# Supplementary material for: Fast Cylindrical Fitting Method Using Point Cloud’s Normals Estimation
Source: Hindawi journal article supplement (doi:10.1155/2018/8904653), 2018-12-12
Supplement: f1 [file 8904653.f1.zip]

Archive with 15 entries (13 files):
- 8904653_SupplDesc.docx
- MATLAB code/
- MATLAB code/Measuring code.m
- MATLAB code/Straightness error.m
- MATLAB code/testtime1.m
- MATLAB code/testtime2.m
- Point data/
- Point data/normal.txt
- Point data/picking_list_end.txt.txt
- Point data/picking_list_front.txt.txt
- Point data/pipe1.txt
- Point data/pipe2.txt
- Point data/Point cloud1.txt
- Point data/Point cloud2.txt
- Point data/Point cloud3.txt
