# Supplementary material for: Fast Cylindrical Fitting Method Using Point Cloud’s Normals Estimation
Source: Hindawi journal article supplement (doi:10.1155/2018/8904653), 2018-12-12
Supplement: f1 [file 8904653.f1.zip › 8904653_SupplDesc.docx]

Dear Editors and Reviewers:

Thank you very much for your letter and accepting our manuscript entitled “Fast Cylindrical Fitting Method Using Point Cloud’s Normals Estimation” (ID: 8904653).

For the supplementary materials, the ***Straightness error.m*** is the main program of the MATLAB, and all the calculations and drawings are done with it. The ***picking_list_front.txt*** is the pipe mouth data, and the ***picking_list_end.txt*** is the pipe wall data. The ***Point cloud1.txt***, ***Point cloud2.txt*** and ***Point cloud3.txt*** are three measurements of point cloud data. The ***normal.txt*** is the front-end point cloud data, the ***pipe1.txt*** is the first set of pipeline point cloud data, and the ***pipe2.txt*** is the second set of pipeline point cloud data. The ***Measuring code.m*** is MATLAB code for measuring the radius and direction vector of the cylinder and the number of iterations. The ***testtime1.m*** is the MATLAB code for measuring the time used in this paper, the ***testtime2.m*** is the MATLAB code for measuring the time used in the reference [13].

Personally, I think they shouldn’t be included in the manuscript. Because the point data is large and the MATLAB code is relatively long. Also, they are just supplementary materials to support the data in the manuscript.

Once again, thank you very much for your comments and suggestions.
