# Supplementary material for: Fast Cylindrical Fitting Method Using Point Cloud’s Normals Estimation
Source: Hindawi journal article supplement (doi:10.1155/2018/8904653), 2018-12-12
Supplement: f1 [file 8904653.f1.zip › MATLAB code/testtime1.m]

clear;
clc
load('pipe1.mat');
data=pipe1;
nx=length(data);
p0=0;
C=zeros(3,3);
P11=zeros(3,nx);
for i=1:nx
idx=knnsearch(data,data(2,:),'k',21);
  for j=2:21
    p0=data(idx(j),:)+p0;
  end
  p0=p0/20;
  for j=2:21
     C=C+(data(idx(j))-p0)'*(data(idx(j))-p0);
  end
  C=C/20;
  [V,D]=eig(C);
  for j=1:3
   if D(j,j)==min(D);
   P11(:,i)=V(:,j);
   end
  end
 p0=0;
C=zeros(3,3);
end
P1=data;
%nx=length(P1);
P=P11';
%P1=load('pipe1.txt');
nn=length(P1);
n=length(P);
Normal_x=P(1:n,1);
Normal_y=P(1:n,2);
Normal_z=P(1:n,3);
A=zeros(2,2);
b=zeros(2,1);
for i=1:n
 A(1,1)=A(1,1)+Normal_x(i)*Normal_x(i);
 A(1,2)=A(1,2)+Normal_x(i)*Normal_y(i);
  A(2,1)=A(2,1)+Normal_x(i)*Normal_y(i);
 % A(1,3)=A(1,3)+Normal_x(i)*Normal_z(i);
   A(2,2)=A(2,2)+Normal_y(i)*Normal_y(i);
   b(1)=b(1)+Normal_x(i)*Normal_z(i);
    b(2)=b(2)+Normal_y(i)*Normal_z(i);
   % A(2,3)=A(2,3)+Normal_z(i)*Normal_y(i);
   %  A(3,3)=A(3,3)+Normal_z(i)*Normal_z(i);
end
b(1)=-b(1);
b(2)=-b(2);
%A(3,1)=A(1,3);
%A(3,2)=A(2,3);
x=A\b;
Plane=zeros(4,1);
Plane(1)=x(1);
Plane(2)=x(2);
Plane(3)=1;
Plane(4)=0;
dd=zeros(nn,1);
for i=1:nn
dd(i)=abs(Plane(1)*P1(i,1)+Plane(2)*P1(i,2)+Plane(3)*P1(i,3)+Plane(4))/sqrt(Plane(1)^2+Plane(2)^2+Plane(3)^2);
end

P2=zeros(nn,3);
Normal=[Plane(1),Plane(2),Plane(3)];
for i=1:nn
choice1=P1(i,:)+dd(i)*Normal/sqrt(Plane(1)^2+Plane(2)^2+Plane(3)^2);
choice2=P1(i,:)-dd(i)*Normal/sqrt(Plane(1)^2+Plane(2)^2+Plane(3)^2);
if abs(Plane(1)*choice1(1)+Plane(2)*choice1(2)+Plane(3)*choice1(3)+Plane(4))>abs(Plane(1)*choice2(1)+Plane(2)*choice2(2)+Plane(3)*choice2(3)+Plane(4))
P2(i,:)=choice2;
else
  P2(i,:)=choice1;  
end
end    

l=Plane(1)/sqrt(Plane(1)*Plane(1)+Plane(2)*Plane(2)+Plane(3)*Plane(3));
m=Plane(2)/sqrt(Plane(1)*Plane(1)+Plane(2)*Plane(2)+Plane(3)*Plane(3));
n=Plane(3)/sqrt(Plane(1)*Plane(1)+Plane(2)*Plane(2)+Plane(3)*Plane(3));

R=[1-l^2/(1+n),-l*m/(1+n),-l;-l*m/(1+n),1-m^2/(1+n),-m;l,m,n]; 
P3=(R*P1')';
X=[P3(:,1),P3(:,2)];
y=zeros(nn,1);
bb=[rand(1)*100 rand(1) rand(1)];
fun=inline('X(:,1).^2+X(:,2).^2+a(1)*X(:,1)+a(2)*X(:,2)+a(3)','a','X');
a=nlinfit(X,y,fun,bb);
X1=-a(1)/2;
Y1=-a(2)/2;
R0=sqrt(a(1)^2+a(2)^2-4*a(3))/2;
Z1=sum(P3(:,3))/nn;
Center0=R\[X1;Y1;Z1];
X0=Center0(1);
Y0=Center0(2);
Z0=Center0(3);
P1=1000*P1;
X0=1000*X0;
Y0=1000*Y0;
Z0=1000*Z0;
R0=1000*R0;
