# Supplementary material for: Fast Cylindrical Fitting Method Using Point Cloud’s Normals Estimation
Source: Hindawi journal article supplement (doi:10.1155/2018/8904653), 2018-12-12
Supplement: f1 [file 8904653.f1.zip › MATLAB code/testtime2.m]

load('pipe1.mat');
data=pipe1;
nx=length(data);

m1=180;
m2=720;
pi=3.1415926;
fi0=0;
for i=1:m1-1
    Sz0=sin(pi*i/2/m1);
    num=round(m2*cos(pi*i/2/m1));
  for j=1:num
      Sx0=cos(pi*i/2/m1)*cos(2*pi*j/num);
      Sy0=cos(pi*i/2/m1)*sin(2*pi*j/num);
      S=[Sx0,Sy0,Sz0];
S=S/sqrt(Sx0^2+Sy0^2+Sz0^2);
l=S(1);
m=S(2);
n=S(3);
R=[1-l^2/(1+n),-l*m/(1+n),-l;-l*m/(1+n),1-m^2/(1+n),-m;l,m,n]; 
data1=R*data';
fi=0;
T=zeros(3,3);
b=zeros(3,1);
for k=1:nx
          T(1,1)=T(1,1)+data1(1,k)^2;
          T(1,2)=T(1,2)+data1(1,k)*data1(2,k);
          T(1,3)=T(1,3)+data1(1,k);
           T(2,1)=T(2,1)+data1(1,k)*data1(2,k);
            T(2,2)=T(2,2)+data1(2,k)*data1(2,k);
             T(2,3)=T(2,3)+data1(2,k);
              T(3,1)=T(3,1)+data1(1,k);
              T(3,2)=T(3,2)+data1(2,k);
              T(3,3)=T(3,3)+1;
              b(1)=b(1)+data1(1,k)^3+data1(1,k)*data1(2,k)^2;
               b(2)=b(2)+data1(2,k)^3+data1(2,k)*data1(1,k)^2;
                b(3)=b(3)+data1(1,k)^2+data1(2,k)^2;
end
A=-inv(T)*b;
for kk=1:nx
    fi=fi+(data1(1,kk)^2+data1(2,kk)^2+A(1)*data1(1,kk)+A(2)*data1(2,kk)+A(3))^2;
end 
if i==1&&j==1
    S0=S;
    fi0=fi;
    A0=A;
else
    if fi<fi0
        S0=S;
        fi0=fi;
        A0=A;
    end
end
end
end
l=S0(1);
m=S0(2);
n=S0(3);
R=[1-l^2/(1+n),-l*m/(1+n),-l;-l*m/(1+n),1-m^2/(1+n),-m;l,m,n]; 
data1=R*data';
Plane=zeros(3,1);
Plane(1)=l/n;
Plane(2)=m/n;
Plane(3)=1;
X1=-A0(1)/2;
Y1=-A0(2)/2;
R0=sqrt(A0(1)^2+A0(2)^2-4*A0(3))/2;
Z1=sum(data1(3,:))/nx;
Center0=R\[X1;Y1;Z1];
X0=Center0(1);
Y0=Center0(2);
Z0=Center0(3);
