# Supplementary material for: Fast Cylindrical Fitting Method Using Point Cloud’s Normals Estimation
Source: Hindawi journal article supplement (doi:10.1155/2018/8904653), 2018-12-12
Supplement: f1 [file 8904653.f1.zip › Point data/normal.txt]

0.779913 0.00579394 -0.625861 
0.777423 0.0133622 -0.628836 
0.782198 -0.00795504 -0.622979 
0.777934 0.0200824 -0.628025 
0.781296 -0.0162614 -0.623948 
0.779035 0.0039798 -0.626968 
0.783123 -0.0260685 -0.62132 
0.780182 0.00176901 -0.62555 
0.786745 -0.0560494 -0.614728 
0.77704 0.0176128 -0.629205 
0.78152 -0.0157918 -0.62368 
0.775738 0.0286813 -0.630403 
0.784703 -0.0362742 -0.61881 
0.799978 -0.0963656 -0.59224 
0.779848 0.010225 -0.625885 
0.772047 0.0441991 -0.634027 
0.798151 -0.074088 -0.597885 
0.784074 -0.0144627 -0.620499 
0.774899 0.0328797 -0.631229 
0.80923 -0.144142 -0.569535 
0.794931 -0.0456035 -0.604984 
0.812735 -0.104039 -0.573269 
0.781162 0.00379501 -0.624317 
0.779099 0.0215432 -0.62653 
0.772748 0.0406254 -0.633411 
0.818215 -0.182225 -0.545269 
0.794938 -0.0296903 -0.605964 
0.807174 -0.0866756 -0.583915 
0.775849 0.034286 -0.629987 
0.820755 -0.140852 -0.553644 
0.783671 0.0139416 -0.62102 
0.808268 -0.0662691 -0.585074 
0.814126 -0.1204 -0.568069 
0.820952 -0.216759 -0.528255 
0.791596 -0.0128266 -0.610911 
0.772404 0.0389628 -0.633936 
0.826011 -0.180561 -0.533951 
0.817094 -0.106819 -0.566522 
0.779835 0.0216191 -0.625612 
0.80542 -0.048799 -0.590693 
0.826697 -0.252634 -0.502741 
0.823903 -0.154176 -0.545357 
0.773904 0.0381514 -0.632153 
0.791254 -0.00781324 -0.611438 
0.831592 -0.219717 -0.510078 
0.813476 -0.0854153 -0.575292 
0.800194 -0.0309906 -0.59894 
0.822105 -0.126249 -0.555162 
0.779392 0.0299486 -0.62582 
0.830544 -0.19035  -0.523415 
0.786486 0.00824511 -0.617553 
0.830514 -0.288004 -0.476759 
0.831709 -0.248804 -0.496343 
0.774626 0.0409955 -0.631089 
0.83033 -0.162042 -0.533193 
0.810249 -0.0682957 -0.582093 
0.793608 -0.0222825 -0.608021 
0.823851 -0.125289 -0.552786 
0.785869 0.00816522 -0.618339 
0.778324 0.0300037 -0.627146 
0.836843 -0.227488 -0.497939 
0.829642 -0.32163 -0.456343 
0.770983 0.0466815 -0.635143 
0.837437 -0.204907 -0.506668 
0.835113 -0.298269 -0.462192 
0.790905 -0.00794547 -0.611887 
0.816845 -0.101873 -0.567791 
0.807017 -0.055052 -0.587956 
0.83518 -0.161142 -0.52584 
0.83878 -0.26438 -0.475974 
0.772459 0.0446067 -0.633496 
0.78609 0.0128838 -0.617978 
0.802434 -0.0424926 -0.595226 
0.829807 -0.357251 -0.428709 
0.778954 0.0316992 -0.626279 
0.841699 -0.241617 -0.482871 
0.834384 -0.336025 -0.43691 
0.83003 -0.139637 -0.539955 
0.838166 -0.192918 -0.510157 
0.816857 -0.0938617 -0.569152 
0.790039 -0.00157931 -0.613055 
0.841835 -0.297315 -0.450463 
0.774901 0.0385341 -0.630907 
0.812213 -0.0799707 -0.577854 
0.78344 0.013704 -0.621317 
0.776343 0.0352081 -0.629326 
0.83612 -0.178393 -0.518728 
0.831211 -0.384808 -0.401263 
0.845263 -0.283616 -0.452871 
0.825281 -0.131514 -0.549195 
0.842438 -0.229085 -0.487666 
0.805418 -0.0508939 -0.590518 
0.786979 0.00450154 -0.616963 
0.838058 -0.361369 -0.408745 
0.84141 -0.333574 -0.425156 
0.820678 -0.117036 -0.559276 
0.841965 -0.213798 -0.495363 
0.832165 -0.165605 -0.529222 
0.798719 -0.0340613 -0.600739 
0.775734 0.032776 -0.630208 
0.8471 -0.26872 -0.458487 
0.784705 0.0146043 -0.619698 
0.846431 -0.319954 -0.425656 
0.814449 -0.0843273 -0.574075 
0.823351 -0.426132 -0.374839 
0.828947 -0.152904 -0.538022 
0.83314 -0.398302 -0.383709 
0.780604 0.0234236 -0.624587 
0.844617 -0.247734 -0.474606 
0.789183 -0.00321873 -0.614149 
0.812176 -0.0756803 -0.578483 
0.840223 -0.202769 -0.502901 
0.840242 -0.367332 -0.398825 
0.823895 -0.121189 -0.553634 
0.847405 -0.30175 -0.436866 
0.845932 -0.345267 -0.406435 
0.777068 0.0306515 -0.62867 
0.821132 -0.452121 -0.348323 
0.803345 -0.0456147 -0.593764 
0.773453 0.0365113 -0.632801 
0.838379 -0.193524 -0.509577 
0.78767 0.00572907 -0.616071 
0.833225 -0.423117 -0.35596 
0.844449 -0.249936 -0.473749 
0.832689 -0.156326 -0.531217 
0.846417 -0.292199 -0.445194 
0.819843 -0.106848 -0.562531 
0.837758 -0.398512 -0.373296 
0.775033 0.034156 -0.630996 
0.798905 -0.0338816 -0.600502 
0.84815 -0.342148 -0.404446 
0.814508 -0.0895874 -0.573193 
0.839545 -0.229005 -0.492667 
0.844336 -0.373991 -0.383703 
0.814516 -0.484006 -0.319845 
0.831712 -0.151622 -0.534103 
0.846961 -0.323599 -0.42183 
0.787246 0.00504351 -0.616618 
0.83917 -0.190089 -0.509568 
0.773489 0.0350219 -0.632841 
0.825809 -0.454874 -0.333361 
0.808992 -0.0726368 -0.583314 
0.845863 -0.291353 -0.446799 
0.833542 -0.430724 -0.345955 
0.78276 0.0125961 -0.622196 
0.77734 0.027517 -0.628478 
0.821959 -0.123845 -0.555919 
0.844509 -0.265155 -0.465292 
0.798371 -0.0327077 -0.601277 
0.84087 -0.406349 -0.357518 
0.833981 -0.177925 -0.52232 
0.846152 -0.366406 -0.387005 
0.842799 -0.235232 -0.484102 
0.848905 -0.323234 -0.418186 
0.81777 -0.104871 -0.56591 
0.831509 -0.154691 -0.533539 
0.806889 -0.515471 -0.288479 
0.77763 0.0238305 -0.62827 
0.795166 -0.0153397 -0.606198 
0.846027 -0.345627 -0.405931 
0.820551 -0.484623 -0.303045 
0.810212 -0.0704725 -0.581885 
0.84443 -0.39502 -0.361798 
0.84625 -0.299051 -0.440942 
0.826 -0.46537 -0.318049 
0.77903 0.0206882 -0.626646 
0.836534 -0.439676 -0.32695 
0.846458 -0.267275 -0.460513 
0.83892 -0.215033 -0.499974 
0.786604 0.000636079 -0.617458 
0.807112 -0.0545573 -0.587872 
0.825007 -0.139866 -0.547541 
0.836735 -0.191124 -0.513173 
0.820788 -0.109605 -0.56062 
0.844715 -0.381219 -0.37567 
0.774739 0.0285905 -0.631634 
0.84742 -0.353519 -0.39611 
0.793837 -0.547536 -0.264626 
0.84237 -0.252858 -0.475894 
0.794864 -0.0218476 -0.606395 
0.776725 0.0183029 -0.629574 
0.816122 -0.498349 -0.292563 
0.810059 -0.52159 -0.267859 
0.833965 -0.173465 -0.523843 
0.818947 -0.0921168 -0.566428 
0.846565 -0.331964 -0.416087 
0.785467 -0.00342977 -0.618894 
0.846494 -0.299358 -0.440264 
0.839636 -0.432743 -0.328246 
0.831233 -0.466032 -0.303092 
0.841417 -0.228342 -0.489772 
0.828578 -0.141455 -0.541709 
0.811652 -0.071313 -0.579772 
0.84154 -0.409329 -0.352506 
0.844955 -0.382534 -0.373789 
0.844369 -0.284005 -0.454293 
0.780012 -0.583733 -0.225472 
0.799675 -0.0316935 -0.599596 
0.824342 -0.122716 -0.55263 
0.838131 -0.214123 -0.501686 
0.78462 0.00302845 -0.61997 
0.836897 -0.183038 -0.515849 
0.846644 -0.268764 -0.459303 
0.844885 -0.358644 -0.396919 
0.797009 -0.551853 -0.245431 
0.846792 -0.331568 -0.41594 
0.808399 -0.527553 -0.261109 
0.819974 -0.506653 -0.266354 
0.779587 0.0191174 -0.626002 
0.817965 -0.0974216 -0.566959 
0.83145 -0.46242 -0.307992 
0.808597 -0.0560556 -0.585687 
0.842638 -0.410911 -0.348013 
0.77618 0.0265972 -0.62995 
0.832969 -0.165891 -0.527867 
0.843458 -0.254358 -0.47316 
0.836095 -0.439602 -0.32817 
0.798762 -0.0259376 -0.601088 
0.846228 -0.319897 -0.426103 
0.823643 -0.497586 -0.272068 
0.768821 -0.610015 -0.191822 
0.842093 -0.212546 -0.495685 
0.785313 0.00233919 -0.619094 
0.848542 -0.295747 -0.43876 
0.784252 -0.583389 -0.211203 
0.846312 -0.362282 -0.390523 
0.840507 -0.401709 -0.363564 
0.826507 -0.13635 -0.546163 
0.797961 -0.556173 -0.232228 
0.822035 -0.102724 -0.560094 
0.792434 -0.00970545 -0.60988 
0.80671 -0.0537028 -0.588503 
0.807544 -0.539473 -0.238417 
0.784392 0.00739402 -0.620221 
0.839738 -0.196998 -0.505995 
0.846417 -0.284272 -0.450297 
0.827182 -0.485502 -0.282945 
0.834719 -0.444767 -0.324696 
0.844696 -0.354747 -0.400804 
0.846102 -0.256686 -0.467144 
0.835771 -0.170545 -0.521921 
0.817532 -0.0900684 -0.568796 
0.75228 -0.638875 -0.160977 
0.782385 0.0136274 -0.622646 
0.848261 -0.328403 -0.415457 
0.841116 -0.401815 -0.362033 
0.789338 -0.00679433 -0.613921 
0.804801 -0.042897 -0.591993 
0.771833 -0.609626 -0.180636 
0.835341 -0.430948 -0.341306 
0.814797 -0.525595 -0.244655 
0.828467 -0.138424 -0.542661 
0.783794 -0.587446 -0.201431 
0.843015 -0.238581 -0.482083 
0.798701 -0.561793 -0.215558 
0.828409 -0.476468 -0.294477 
0.843777 -0.382145 -0.376837 
0.814878 -0.079883 -0.574102 
0.845994 -0.315986 -0.429472 
0.839922 -0.206707 -0.501799 
0.785733 0.00491665 -0.618546 
0.84925 -0.28995 -0.441253 
0.800672 -0.032434 -0.598225 
0.834348 -0.171793 -0.523785 
0.816812 -0.517809 -0.254347 
0.822979 -0.112607 -0.556799 
0.736932 -0.661875 -0.137308 
0.846433 -0.362625 -0.389941 
0.830717 -0.467334 -0.302505 
0.783614 0.00934352 -0.621178 
0.789628 -0.00623965 -0.613555 
0.84577 -0.269596 -0.460426 
0.837675 -0.427709 -0.339656 
0.762557 -0.629461 -0.149282 
0.808468 -0.0575034 -0.585725 
0.804566 -0.549908 -0.224221 
0.832203 -0.156472 -0.531934 
0.845577 -0.352923 -0.400555 
0.789737 -0.585244 -0.18386 
0.768661 -0.618832 -0.16189 
0.845413 -0.252374 -0.470727 
0.839817 -0.207171 -0.501785 
0.823998 -0.111644 -0.555484 
0.838165 -0.420242 -0.347672 
0.785667 0.000131129 -0.61865 
0.81841 -0.512904 -0.259102 
0.845463 -0.327714 -0.421658 
0.842013 -0.394183 -0.368286 
0.80377 -0.0428724 -0.593394 
0.832199 -0.461344 -0.307581 
0.718737 -0.687258 -0.105327 
0.746746 -0.653169 -0.125465 
0.781176 0.0167274 -0.624087 
0.806249 -0.546841 -0.225669 
0.818061 -0.090631 -0.567946 
0.79426 -0.575466 -0.19491 
0.823115 -0.494312 -0.279531 
0.793744 -0.010899 -0.608155 
0.846531 -0.304449 -0.436687 
0.842888 -0.23145 -0.485768 
0.832251 -0.151489 -0.533301 
0.835929 -0.190039 -0.514886 
0.843413 -0.379198 -0.380608 
0.809945 -0.0703579 -0.582271 
0.847591 -0.358232 -0.391484 
0.756509 -0.639342 -0.137606 
0.833377 -0.453504 -0.315938 
0.787126 0.00483504 -0.616773 
0.771465 -0.617801 -0.152198 
0.845202 -0.288272 -0.450036 
0.799952 -0.0290678 -0.599359 
0.794113 -0.57607 -0.193721 
0.790079 -0.00784193 -0.612955 
0.827723 -0.143924 -0.542366 
0.808267 -0.54275 -0.228313 
0.836468 -0.430084 -0.339631 
0.842677 -0.224324 -0.489463 
0.698337 -0.711539 -0.0777049 
0.845669 -0.3381 -0.412956 
0.782509 -0.600946 -0.16292 
0.824186 -0.492084 -0.280304 
0.811403 -0.530092 -0.246227 
0.721769 -0.686988 -0.0842366 
0.822303 -0.115269 -0.557253 
0.798359 -0.0215806 -0.601795 
0.786224 0.0122443 -0.61782 
0.741077 -0.664066 -0.0991057 
0.813738 -0.0722245 -0.576727 
0.846399 -0.270685 -0.458628 
0.839196 -0.191182 -0.509116 
0.846378 -0.3182 -0.427075 
0.825919 -0.480962 -0.294166 
0.837965 -0.409636 -0.360572 
0.789397 -0.00336957 -0.613874 
0.843804 -0.381017 -0.377917 
0.832511 -0.457257 -0.312797 
0.795302 -0.573253 -0.197168 
0.755352 -0.645266 -0.114345 
0.783626 -0.598028 -0.168203 
0.834137 -0.178379 -0.521917 
0.803319 -0.0438263 -0.593934 
0.843439 -0.369286 -0.390178 
0.816547 -0.522478 -0.245496 
0.821798 -0.106226 -0.559789 
0.847319 -0.238408 -0.474565 
0.830408 -0.150566 -0.536425 
0.688783 -0.723499 -0.0461193 
0.784537 0.0149151 -0.619903 
0.790583 0.00601398 -0.612325 
0.848282 -0.304117 -0.43351 
0.702796 -0.709637 -0.0499299 
0.803885 -0.554084 -0.21624 
0.845778 -0.266895 -0.461981 
0.848716 -0.344058 -0.401629 
0.765667 -0.628672 -0.13611 
0.797485 -0.0218291 -0.602944 
0.835617 -0.439107 -0.330046 
0.723099 -0.686879 -0.0729683 
0.737073 -0.670157 -0.087258 
0.819386 -0.509023 -0.263631 
0.814218 -0.079712 -0.57506 
0.841537 -0.217486 -0.494486 
0.839817 -0.413156 -0.352151 
0.794107 -0.0130726 -0.607637 
0.823496 -0.492123 -0.282256 
0.80513 -0.0413665 -0.591654 
0.780499 -0.603225 -0.164136 
0.829855 -0.144239 -0.539013 
0.837064 -0.186436 -0.514359 
0.843797 -0.396157 -0.36203 
0.658014 -0.752846 -0.0155071 
0.848416 -0.335641 -0.409312 
0.768623 -0.624743 -0.137533 
0.787169 -0.590465 -0.17809 
0.746239 -0.65796 -0.10107 
0.8462 -0.302725 -0.438524 
0.825728 -0.477372 -0.300483 
0.802419 -0.556153 -0.216373 
0.846241 -0.37763 -0.375861 
0.789651 0.00305203 -0.613549 
0.824477 -0.129346 -0.550915 
0.845398 -0.271154 -0.460194 
0.835201 -0.447339 -0.319887 
0.690916 -0.722329 -0.0296144 
0.801155 -0.0301261 -0.597698 
0.816971 -0.0909332 -0.569465 
0.706008 -0.706627 -0.0472359 
0.792644 -0.00909727 -0.609617 
0.720232 -0.691701 -0.0530619 
0.810453 -0.535698 -0.237053 
0.757678 -0.642216 -0.116113 
0.834494 -0.176995 -0.521817 
0.843039 -0.223656 -0.489146 
0.843491 -0.252585 -0.47405 
0.814087 -0.522959 -0.252538 
0.84819 -0.335484 -0.409909 
0.790434 -0.583728 -0.185677 
0.836083 -0.435689 -0.333378 
0.787062 0.0113943 -0.616768 
0.671304 -0.741177 -0.00279558 
0.845464 -0.376431 -0.378802 
0.811363 -0.063564 -0.581077 
0.774445 -0.615082 -0.148017 
0.81751 -0.510909 -0.265797 
0.800036 -0.0264171 -0.59937 
0.733397 -0.676193 -0.0699429 
0.832418 -0.161082 -0.53022 
0.840656 -0.413245 -0.350038 
0.829387 -0.4774 -0.290183 
0.642074 -0.766543 0.0123599 
0.825913 -0.119719 -0.55094 
0.840546 -0.209882 -0.499431 
0.791976 -0.000254066 -0.610552 
0.847662 -0.302717 -0.435697 
0.763449 -0.632437 -0.131033 
0.79762 -0.566584 -0.206845 
0.738874 -0.668126 -0.0875919 
0.821525 -0.0974216 -0.561787 
0.808425 -0.054884 -0.586035 
0.831039 -0.465431 -0.304546 
0.687106 -0.726436 -0.0132728 
0.848767 -0.331394 -0.412035 
0.797248 -0.0123891 -0.603525 
0.703931 -0.709907 -0.0226679 
0.847371 -0.361776 -0.388691 
0.847192 -0.288741 -0.445976 
0.844702 -0.252004 -0.472199 
0.837878 -0.191257 -0.511255 
0.801059 -0.556256 -0.221096 
0.747591 -0.656372 -0.101408 
0.789559 0.00464654 -0.613657 
0.841953 -0.410418 -0.350245 
0.778749 -0.607287 -0.157329 
0.834026 -0.160076 -0.527992 
0.821036 -0.508391 -0.259689 
0.616422 -0.786124 0.0451025 
0.714804 -0.697905 -0.0445458 
0.835544 -0.442993 -0.324998 
0.801081 -0.026586 -0.597966 
0.650585 -0.759008 0.0254178 
0.787225 0.0141476 -0.616504 
0.819256 -0.0879896 -0.566636 
0.808576 -0.538412 -0.237314 
0.785467 -0.593403 -0.175822 
0.794273 -0.00615841 -0.607529 
0.762833 -0.633717 -0.128403 
0.663227 -0.748232 0.0167074 
0.84214 -0.236968 -0.484404 
0.846845 -0.330607 -0.416597 
0.824285 -0.493857 -0.276874 
0.827035 -0.140208 -0.544384 
0.845098 -0.389694 -0.36599 
0.812102 -0.061653 -0.580249 
0.722657 -0.688558 -0.0604619 
0.790851 -0.58343 -0.184834 
0.846408 -0.364725 -0.388033 
0.839908 -0.196501 -0.505908 
0.685174 -0.728355 0.00594556 
0.730758 -0.678593 -0.0741905 
0.825792 -0.484351 -0.288913 
0.845422 -0.283608 -0.452579 
0.801132 -0.0228732 -0.59805 
0.846655 -0.271496 -0.457673 
0.746505 -0.657925 -0.0993211 
0.836351 -0.445393 -0.319597 
0.626275 -0.777614 0.0556452 
0.592441 -0.801867 0.077607 
0.799028 -0.563487 -0.209849 
0.827261 -0.12172 -0.548473 
0.792227 0.000964542 -0.610226 
0.762348 -0.63326 -0.133448 
0.78756 0.0143888 -0.616071 
0.697622 -0.716299 -0.0154855 
0.843528 -0.226427 -0.487023 
0.789857 0.00847359 -0.613233 
0.836111 -0.172901 -0.520599 
0.807123 -0.541975 -0.234128 
0.847753 -0.322345 -0.4212 
0.844155 -0.361976 -0.395445 
0.661401 -0.749427 0.0301164 
0.839223 -0.423373 -0.341262 
0.808586 -0.0513625 -0.586133 
0.643395 -0.764016 0.0481899 
0.819469 -0.0990296 -0.564504 
0.830345 -0.471007 -0.297791 
0.772834 -0.616063 -0.152297 
0.800938 -0.019081 -0.598443 
0.811647 -0.528627 -0.248562 
0.840616 -0.409219 -0.354829 
0.845881 -0.256161 -0.467833 
0.832177 -0.154615 -0.532518 
0.75116 -0.651143 -0.108494 
0.818793 -0.510139 -0.263317 
0.703333 -0.710297 -0.0283132 
0.843286 -0.209011 -0.495159 
0.601374 -0.794638 0.0830695 
0.731988 -0.677866 -0.0684968 
0.716166 -0.69641 -0.0460416 
0.783942 -0.595329 -0.17612 
0.79423 -0.572675 -0.203079 
0.845476 -0.300809 -0.44123 
0.672409 -0.739926 0.0193797 
0.789437 0.0084002 -0.613774 
0.558242 -0.820399 0.123735 
0.787107 0.0134879 -0.616669 
0.834181 -0.454946 -0.311717 
0.841561 -0.394575 -0.368898 
0.820068 -0.0880226 -0.565455 
0.804393 -0.0375418 -0.59291 
0.828777 -0.139611 -0.541884 
0.616767 -0.783133 0.0793871 
0.796256 -0.0044345 -0.604944 
0.822366 -0.501475 -0.26877 
0.846662 -0.3511 -0.399866 
0.757944 -0.640667 -0.122748 
0.839302 -0.192306 -0.508518 
0.846115 -0.25802 -0.466385 
0.848475 -0.333559 -0.410888 
0.799942 -0.55984 -0.216037 
0.836428 -0.438098 -0.32933 
0.64436 -0.762357 0.0601008 
0.735189 -0.673435 -0.0773456 
0.683867 -0.72959 0.00490162 
0.798885 -0.0162663 -0.601264 
0.813268 -0.0719369 -0.577425 
0.845977 -0.291881 -0.446239 
0.768371 -0.624384 -0.140537 
0.8085 -0.539997 -0.233948 
0.789723 0.0062114 -0.613433 
0.829558 -0.128572 -0.543417 
0.573597 -0.810107 0.121299 
0.782852 -0.598657 -0.169563 
0.838122 -0.174067 -0.516965 
0.697571 -0.716289 -0.0180277 
0.845444 -0.232341 -0.480877 
0.836927 -0.427513 -0.34174 
0.708217 -0.705408 -0.0287727 
0.826194 -0.488056 -0.281435 
0.740563 -0.666046 -0.0891533 
0.528399 -0.835499 0.150785 
0.844952 -0.326056 -0.423961 
0.843587 -0.388253 -0.370972 
0.793119 -0.0027824 -0.609061 
0.809006 -0.0528483 -0.58542 
0.650191 -0.758021 0.0515325 
0.591673 -0.798458 0.1113 
0.829876 -0.471822 -0.297809 
0.789385 -0.584968 -0.186235 
0.82362 -0.108776 -0.556612 
0.62234 -0.778002 0.0860617 
0.812052 -0.530113 -0.244033 
0.845089 -0.363519 -0.392018 
0.751164 -0.651165 -0.108334 
0.78519 0.018396 -0.618982 
0.842172 -0.218512 -0.492949 
0.846375 -0.285755 -0.449437 
0.715956 -0.696343 -0.050137 
0.835251 -0.161675 -0.525563 
0.767165 -0.625592 -0.141749 
0.796822 -0.569168 -0.202787 
0.677073 -0.735709 0.0174734 
0.800017 -0.0281708 -0.599315 
0.832119 -0.456996 -0.314216 
0.659032 -0.751224 0.0365996 
0.788303 0.00276526 -0.615281 
0.554495 -0.819023 0.147431 
0.791595 -0.00181638 -0.611044 
0.845496 -0.320192 -0.427334 
0.837729 -0.428548 -0.338461 
0.821365 -0.0940505 -0.562596 
0.831383 -0.13967 -0.537861 
0.505996 -0.841962 0.187268 
0.688031 -0.72568 -0.00132447 
0.725669 -0.68541 -0.0601554 
0.845996 -0.263858 -0.463325 
0.841633 -0.19853 -0.502234 
0.817996 -0.51586 -0.254503 
0.840993 -0.395853 -0.368823 
0.566061 -0.812006 0.142203 
0.77655 -0.610324 -0.156444 
0.624991 -0.776153 0.0835075 
0.810149 -0.0513105 -0.583974 
0.75605 -0.6432 -0.121171 
0.734274 -0.674079 -0.080377 
0.821796 -0.502566 -0.268475 
0.804416 -0.55315 -0.216655 
0.59078 -0.797234 0.124083 
0.844962 -0.351246 -0.403318 
0.785993 -0.591512 -0.179801 
0.796588 -0.0173539 -0.604274 
0.8271 -0.486027 -0.282281 
0.843964 -0.252669 -0.473163 
0.69675 -0.717067 -0.0188023 
0.519901 -0.834646 0.18185 
0.847063 -0.302785 -0.436812 
0.838476 -0.182828 -0.513353 
0.789591 0.00119358 -0.613632 
0.829494 -0.132789 -0.542501 
0.844172 -0.38165 -0.376453 
0.807647 -0.0504772 -0.587502 
0.630059 -0.772839 0.0758028 
0.670844 -0.741074 0.0278941 
0.830256 -0.465636 -0.306362 
0.654712 -0.754607 0.0438243 
0.805993 -0.548537 -0.222449 
0.838038 -0.427077 -0.339556 
0.82153 -0.0923624 -0.562635 
0.755722 -0.643293 -0.12271 
0.471721 -0.854111 0.219027 
0.598727 -0.792613 0.115283 
0.538419 -0.825683 0.168379 
0.736548 -0.671326 -0.0825727 
0.789699 -0.585565 -0.183001 
0.704581 -0.708974 -0.0303628 
0.847158 -0.338233 -0.409783 
0.84401 -0.238609 -0.480326 
0.570304 -0.808265 0.146493 
0.846295 -0.287551 -0.448441 
0.786826 0.00685245 -0.617136 
0.792758 -0.00953964 -0.609462 
0.810075 -0.536369 -0.236827 
0.814843 -0.0765631 -0.574604 
0.713278 -0.699597 -0.0424219 
0.769445 -0.622557 -0.142749 
0.839351 -0.413268 -0.353127 
0.680247 -0.732917 0.00983494 
0.845747 -0.371771 -0.382752 
0.836107 -0.165424 -0.52303 
0.842481 -0.217105 -0.493042 
0.803901 -0.0398505 -0.593427 
0.816279 -0.518272 -0.255114 
0.494506 -0.843464 0.209839 
0.824527 -0.491369 -0.280556 
0.829487 -0.133671 -0.542295 
0.776755 -0.610911 -0.153103 
0.848415 -0.317877 -0.423256 
0.739414 -0.66714 -0.0905019 
0.605261 -0.789308 0.103213 
0.443253 -0.864217 0.238025 
0.792502 -0.579717 -0.189391 
0.631128 -0.77181 0.0773759 
0.830789 -0.46689 -0.30299 
0.650471 -0.75787 0.0501925 
0.79137 -0.0108699 -0.61124 
0.574451 -0.805508 0.145474 
0.846405 -0.273205 -0.457118 
0.509627 -0.836747 0.200339 
0.687772 -0.725926 -0.00110202 
0.754062 -0.647309 -0.111271 
0.539872 -0.822041 0.18107 
0.721484 -0.690231 -0.0551492 
0.786534 0.00723925 -0.617505 
0.800752 -0.561422 -0.208813 
0.814112 -0.0700267 -0.576471 
0.83966 -0.202587 -0.503914 
0.841594 -0.402888 -0.359724 
0.821828 -0.106124 -0.559765 
0.848818 -0.342946 -0.402362 
0.837481 -0.168567 -0.519817 
0.834317 -0.448276 -0.320879 
0.695307 -0.718597 -0.0128644 
0.847314 -0.364087 -0.386651 
0.799063 -0.0294339 -0.600526 
0.844841 -0.258066 -0.468664 
0.782883 -0.599868 -0.165084 
0.848722 -0.301597 -0.434408 
0.465169 -0.852374 0.238905 
0.790271 -0.00435113 -0.612743 
0.654637 -0.754701 0.0433121 
0.579475 -0.803263 0.137756 
0.807029 -0.545643 -0.225783 
0.824205 -0.49564 -0.273909 
0.818047 -0.519417 -0.246992 
0.759861 -0.638692 -0.121176 
0.831209 -0.138972 -0.538311 
0.413794 -0.86995 0.268256 
0.73714 -0.670884 -0.0808641 
0.547641 -0.817738 0.177183 
0.603836 -0.789885 0.10707 
0.72332 -0.68789 -0.0601262 
0.624336 -0.776543 0.0847602 
0.479688 -0.846673 0.230312 
0.810415 -0.062666 -0.582495 
0.793604 -0.0128512 -0.608298 
0.836664 -0.436474 -0.330884 
0.844093 -0.399639 -0.357485 
0.820944 -0.10453 -0.56136 
0.849722 -0.334246 -0.40774 
0.787053 -0.590677 -0.177901 
0.664698 -0.746649 0.0263106 
0.513618 -0.831274 0.212557 
0.843218 -0.238375 -0.481831 
0.8487 -0.293376 -0.440044 
0.697622 -0.716221 -0.0187242 
0.841381 -0.208024 -0.498802 
0.765771 -0.628494 -0.136344 
0.826412 -0.482851 -0.289652 
0.673962 -0.738579 0.0166334 
0.795228 -0.574263 -0.194511 
0.844463 -0.373201 -0.384191 
0.805326 -0.0405591 -0.591444 
0.741437 -0.66515 -0.0885797 
0.787791 0.00292325 -0.615935 
0.43701 -0.858638 0.267886 
0.837475 -0.181614 -0.515414 
0.381169 -0.876197 0.29494 
0.550482 -0.816347 0.174779 
0.846465 -0.266667 -0.460853 
0.574575 -0.805762 0.143564 
0.633822 -0.770399 0.0689552 
0.813392 -0.527407 -0.245428 
0.771303 -0.619296 -0.146846 
0.831093 -0.147869 -0.536115 
0.803864 -0.553917 -0.216746 
0.848011 -0.332797 -0.412461 
0.794775 -0.0185186 -0.606622 
0.817353 -0.105282 -0.566437 
0.830416 -0.46849 -0.30154 
0.481514 -0.843772 0.237052 
0.704442 -0.709261 -0.026674 
0.813997 -0.0684201 -0.576825 
0.838924 -0.435333 -0.326638 
0.598453 -0.792765 0.115663 
0.450842 -0.854601 0.257677 
0.716975 -0.695011 -0.0539221 
0.747024 -0.657002 -0.101509 
0.680974 -0.732271 0.00727946 
0.516132 -0.830284 0.210327 
0.843276 -0.403053 -0.355576 
0.845194 -0.245891 -0.474537 
0.398824 -0.86823 0.295155 
0.818697 -0.511687 -0.260598 
0.638789 -0.767216 0.0576867 
0.650946 -0.757974 0.0417777 
0.840507 -0.222774 -0.493882 
0.778471 -0.605576 -0.165108 
0.84889 -0.316567 -0.423286 
0.79959 -0.0340891 -0.599578 
0.847844 -0.366061 -0.383615 
0.825194 -0.126447 -0.550514 
0.610695 -0.785229 0.102315 
0.75397 -0.646981 -0.113776 
0.837487 -0.185369 -0.514055 
0.789768 -0.00546102 -0.613381 
0.791279 -0.582491 -0.185962 
0.349209 -0.87918 0.324185 
0.847937 -0.27923 -0.450592 
0.521626 -0.829366 0.200149 
0.8074 -0.0515469 -0.587749 
0.542196 -0.821594 0.176088 
0.831446 -0.468707 -0.298349 
0.569438 -0.808145 0.150472 
0.730108 -0.679873 -0.0686755 
0.802015 -0.554778 -0.221345 
0.818148 -0.101156 -0.56604 
0.485959 -0.840588 0.239282 
0.840548 -0.433311 -0.325147 
0.821559 -0.500459 -0.273097 
0.420769 -0.860712 0.286579 
0.703576 -0.71008 -0.0277063 
0.843374 -0.399216 -0.359648 
0.679135 -0.733928 0.0112449 
0.786008 0.00525256 -0.618193 
0.450501 -0.851482 0.268379 
0.766184 -0.628807 -0.132531 
0.847985 -0.343391 -0.403738 
0.660769 -0.750092 0.02732 
0.834762 -0.174067 -0.522373 
0.620224 -0.779227 0.0901554 
0.796928 -0.0256703 -0.603528 
0.368525 -0.871107 0.324596 
0.842725 -0.22326 -0.489867 
0.791162 -0.00436804 -0.611591 
0.320054 -0.881502 0.347158 
0.741876 -0.66463 -0.0888063 
0.84569 -0.263354 -0.464169 
0.707047 -0.70626 -0.0357921 
0.806701 -0.542755 -0.233774 
0.499328 -0.836944 0.224043 
0.848522 -0.315692 -0.424675 
0.580427 -0.802622 0.137489 
0.791824 -0.58046 -0.189949 
0.801713 -0.0338786 -0.596748 
0.631564 -0.772292 0.0684965 
0.844899 -0.375016 -0.381456 
0.772661 -0.615931 -0.153704 
0.826855 -0.142581 -0.544042 
0.814644 -0.0964046 -0.571893 
0.388869 -0.865792 0.314937 
0.832273 -0.465698 -0.300743 
0.543073 -0.820233 0.179693 
0.812316 -0.0668961 -0.579368 
0.792781 -0.011455 -0.609399 
0.837752 -0.430594 -0.335798 
0.455901 -0.848834 0.267647 
0.840007 -0.206078 -0.501916 
0.512098 -0.833019 0.209368 
0.592545 -0.796068 0.123149 
0.821411 -0.505099 -0.264875 
0.414164 -0.858558 0.302235 
0.849025 -0.297233 -0.436818 
0.746287 -0.658474 -0.0973002 
0.682521 -0.730864 0.001927 
0.849539 -0.346913 -0.397411 
0.338187 -0.873469 0.35026 
0.654708 -0.754675 0.0427012 
0.284541 -0.883251 0.372699 
0.723009 -0.688507 -0.0567014 
0.810411 -0.53149 -0.24648 
0.765116 -0.630814 -0.129114 
0.841188 -0.415642 -0.345896 
0.845363 -0.257079 -0.468266 
0.639438 -0.766607 0.0585966 
0.800294 -0.0257056 -0.599057 
0.7801 -0.604026 -0.163089 
0.834157 -0.183784 -0.520006 
0.794324 -0.574987 -0.196062 
0.468029 -0.845633 0.25662 
0.691335 -0.722473 -0.00940542 
0.60738 -0.788021 0.100562 
0.822328 -0.132987 -0.553255 
0.711283 -0.701627 -0.0423736 
0.55193 -0.816161 0.171043 
0.48698 -0.840959 0.235877 
0.843838 -0.381485 -0.377368 
0.350424 -0.87063 0.345262 
0.810078 -0.0621196 -0.583023 
0.843361 -0.24034 -0.480603 
0.847755 -0.292662 -0.442336 
0.8483 -0.335651 -0.409543 
0.830812 -0.471364 -0.295918 
0.424752 -0.856189 0.294154 
0.303436 -0.877817 0.370627 
0.800439 -0.560199 -0.213248 
0.385406 -0.861631 0.330233 
0.569569 -0.807255 0.154694 
0.732342 -0.677216 -0.0710838 
0.514813 -0.831646 0.208164 
0.819962 -0.509346 -0.261206 
0.820868 -0.112681 -0.559892 
0.834583 -0.450008 -0.317748 
0.832197 -0.162874 -0.530019 
0.747546 -0.655872 -0.104915 
0.255762 -0.879387 0.401578 
0.588127 -0.798192 0.130369 
0.662124 -0.748527 0.0360455 
0.76657 -0.628353 -0.132449 
0.841414 -0.21677 -0.495009 
0.619751 -0.779657 0.0896833 
0.796374 -0.0165893 -0.604577 
0.809714 -0.538935 -0.232191 
0.84142 -0.411897 -0.349791 
0.780682 -0.603624 -0.161782 
0.442361 -0.852442 0.278673 
0.637025 -0.767862 0.0677295 
0.848298 -0.326706 -0.416717 
0.846866 -0.367053 -0.384825 
0.805224 -0.0491319 -0.590932 
0.692117 -0.721587 -0.0168883 
0.845113 -0.281168 -0.454673 
0.792267 -0.0117934 -0.610061 
0.490529 -0.839411 0.234029 
0.714362 -0.698819 -0.0365762 
0.668721 -0.743256 0.0195724 
0.838665 -0.203462 -0.505217 
0.525591 -0.827273 0.198429 
0.318174 -0.870752 0.374909 
0.271895 -0.87608 0.398193 
0.816487 -0.0851306 -0.571054 
0.45809 -0.849564 0.261524 
0.829297 -0.15507 -0.536862 
0.353631 -0.86761 0.349568 
0.388601 -0.862645 0.323779 
0.220195 -0.877109 0.426842 
0.802464 -0.561132 -0.202936 
0.82185 -0.504958 -0.263781 
0.789377 -0.586339 -0.181908 
0.787423 -0.00248098 -0.616408 
0.73112 -0.678365 -0.0726999 
0.831025 -0.471146 -0.295665 
0.745682 -0.659289 -0.0964207 
0.767728 -0.626269 -0.135577 
0.595534 -0.79427 0.120311 
0.844147 -0.253259 -0.47252 
0.83687 -0.440416 -0.325089 
0.842562 -0.403429 -0.35684 
0.826541 -0.131286 -0.547352 
0.845067 -0.370114 -0.385847 
0.81144 -0.532566 -0.240705 
0.555789 -0.814854 0.164657 
0.845633 -0.319883 -0.427293 
0.612555 -0.784392 0.097492 
0.53845 -0.823054 0.180703 
0.404792 -0.860328 0.309804 
0.714118 -0.698605 -0.0445686 
0.836543 -0.18506 -0.515702 
0.796236 -0.0221954 -0.604579 
0.232777 -0.876453 0.421479 
0.80234 -0.0362743 -0.595764 
0.811898 -0.0786132 -0.578482 
0.493572 -0.838357 0.231396 
0.842236 -0.240065 -0.482709 
0.6421 -0.764276 0.0599086 
0.671139 -0.741123 0.0175635 
0.287136 -0.871015 0.398604 
0.426684 -0.854894 0.295123 
0.320108 -0.868638 0.378151 
0.357626 -0.863629 0.355314 
0.464462 -0.846168 0.261292 
0.689551 -0.724213 -0.00593244 
0.845328 -0.34894 -0.404551 
0.774178 -0.614896 -0.15017 
0.191069 -0.870633 0.453311 
0.789303 -0.00535877 -0.613981 
0.749361 -0.653838 -0.104662 
0.823384 -0.114996 -0.55571 
0.786906 -0.592573 -0.172152 
0.845087 -0.302156 -0.441055 
0.836936 -0.434225 -0.333148 
0.841073 -0.22388 -0.492416 
0.731302 -0.678516 -0.0693868 
0.845087 -0.396375 -0.358768 
0.594245 -0.795627 0.117689 
0.831684 -0.164341 -0.530371 
0.80061 -0.562553 -0.206297 
0.824574 -0.497094 -0.270139 
0.621966 -0.778563 0.0836527 
0.652887 -0.756044 0.0462239 
0.830046 -0.476138 -0.290374 
0.792713 -0.0157648 -0.609392 
0.506151 -0.834497 0.217775 
0.384634 -0.860339 0.334476 
0.560433 -0.813249 0.156657 
0.811887 -0.531652 -0.241216 
0.250757 -0.870769 0.422945 
0.205246 -0.871481 0.445416 
0.711591 -0.701716 -0.0351167 
0.795911 -0.0273943 -0.604793 
0.69473 -0.719101 -0.0156239 
0.844334 -0.379283 -0.378476 
0.845822 -0.276291 -0.456343 
0.81414 -0.0717501 -0.576219 
0.530636 -0.825299 0.193149 
0.756915 -0.642726 -0.118246 
0.846529 -0.334533 -0.414096 
0.816888 -0.0948216 -0.568949 
0.839929 -0.423702 -0.339111 
0.804119 -0.0449271 -0.592768 
0.398731 -0.859788 0.319026 
0.288768 -0.867435 0.405178 
0.185321 -0.866157 0.464143 
0.838226 -0.202733 -0.506237 
0.830403 -0.153016 -0.53574 
0.429516 -0.855078 0.290443 
0.469065 -0.844955 0.256961 
0.324611 -0.865786 0.380845 
0.67077 -0.741406 0.0196041 
0.741026 -0.666246 -0.0836501 
0.788737 -0.00727772 -0.614688 
0.843683 -0.25449 -0.472689 
0.76839 -0.6252 -0.136757 
0.83044 -0.468608 -0.301289 
0.786531 -0.592352 -0.174607 
0.803454 -0.556026 -0.212831 
0.569899 -0.808348 0.147609 
0.592587 -0.796525 0.11995 
0.504943 -0.834601 0.220168 
0.337821 -0.866866 0.366634 
0.631646 -0.772072 0.0702038 
0.217246 -0.868046 0.44643 
0.715937 -0.696501 -0.048169 
0.821243 -0.510057 -0.255739 
0.794264 -0.0270066 -0.606972 
0.848127 -0.311418 -0.428601 
0.844728 -0.369102 -0.387553 
0.842732 -0.233016 -0.485291 
0.649612 -0.758561 0.0508954 
0.182612 -0.864632 0.468043 
0.257817 -0.867086 0.426254 
0.814869 -0.527998 -0.239179 
0.790075 -0.0169104 -0.612777 
0.839732 -0.412903 -0.352649 
0.174033 -0.861693 0.476653 
0.474679 -0.846134 0.242357 
0.83504 -0.18979 -0.516419 
0.835286 -0.452235 -0.312698 
0.676809 -0.736113 0.00814324 
0.82738 -0.132518 -0.545785 
0.532457 -0.825583 0.186823 
0.604804 -0.789132 0.107161 
0.802368 -0.0376288 -0.595643 
0.354175 -0.865873 0.353304 
0.75245 -0.650061 -0.106014 
0.818576 -0.0950372 -0.566482 
0.294258 -0.866466 0.403297 
0.432441 -0.852939 0.292386 
0.773648 -0.615845 -0.149008 
0.689971 -0.723812 -0.00600162 
0.80993 -0.0655929 -0.582847 
0.74178 -0.66436 -0.0915818 
0.38913 -0.862558 0.323376 
0.845409 -0.296517 -0.444254 
0.848739 -0.342426 -0.402971 
0.173306 -0.860693 0.47872 
0.789321 -0.587012 -0.17997 
0.840209 -0.219583 -0.495814 
0.837599 -0.44199 -0.32105 
0.82261 -0.502628 -0.265853 
0.833151 -0.166628 -0.527346 
0.565395 -0.810191 0.154654 
0.500111 -0.837763 0.219184 
0.314879 -0.865084 0.390488 
0.841132 -0.403027 -0.360646 
0.800909 -0.562132 -0.206283 
0.718867 -0.692733 -0.0578877 
0.448868 -0.851479 0.27111 
0.650787 -0.757806 0.0469738 
0.219817 -0.865086 0.450895 
0.163569 -0.858508 0.486013 
0.185059 -0.861105 0.473552 
0.536753 -0.823631 0.183107 
0.845559 -0.27231 -0.459214 
0.476953 -0.845426 0.240355 
0.620045 -0.779102 0.09244 
0.367098 -0.863771 0.345165 
0.793232 -0.0210087 -0.608557 
0.697293 -0.716629 -0.0150157 
0.826187 -0.130805 -0.548002 
0.798822 -0.0348835 -0.600555 
0.248923 -0.864388 0.436887 
0.758151 -0.642377 -0.112061 
0.843357 -0.38417 -0.375715 
0.809332 -0.538724 -0.234006 
0.794927 -0.0299914 -0.605964 
0.575034 -0.805317 0.144225 
0.398787 -0.859029 0.320994 
0.167388 -0.859207 0.483472 
0.326656 -0.866307 0.377899 
0.774889 -0.614038 -0.150013 
0.846922 -0.331473 -0.415751 
0.826188 -0.485127 -0.28647 
0.84549 -0.257469 -0.467821 
0.8397 -0.206007 -0.502459 
0.162792 -0.85741 0.488209 
0.596918 -0.794316 0.112915 
0.819134 -0.10963 -0.563029 
0.735939 -0.671813 -0.0840304 
0.835883 -0.439756 -0.328504 
0.808486 -0.0642931 -0.584993 
0.663023 -0.748144 0.0260883 
0.16052 -0.855805 0.491763 
0.26589 -0.865535 0.424442 
0.833433 -0.160718 -0.528733 
0.454692 -0.850052 0.265833 
0.501729 -0.836384 0.220748 
0.789436 -0.586035 -0.18263 
0.722666 -0.688655 -0.0592294 
0.84596 -0.307652 -0.435548 
0.420114 -0.856582 0.299619 
0.764827 -0.631405 -0.127939 
0.843186 -0.373633 -0.386568 
0.701828 -0.711828 -0.0271737 
0.828041 -0.475588 -0.296925 
0.372253 -0.862461 0.342912 
0.622508 -0.778053 0.0843639 
0.18564 -0.857502 0.479821 
0.792554 -0.0168153 -0.609569 
0.796493 -0.569837 -0.2022 
0.811242 -0.531199 -0.244365 
0.672395 -0.740019 0.0160096 
0.477059 -0.844333 0.243961 
0.282897 -0.865142 0.414124 
0.643423 -0.76295 0.0625683 
0.843769 -0.242296 -0.478901 
0.840601 -0.422579 -0.338848 
0.53277 -0.825295 0.187201 
0.795571 -0.0292162 -0.605155 
0.322728 -0.867887 0.377649 
0.215072 -0.861907 0.459195 
0.163988 -0.856566 0.489289 
0.157411 -0.854151 0.495629 
0.827929 -0.1382 -0.543539 
0.844905 -0.295351 -0.445986 
0.159884 -0.855846 0.491898 
0.80362 -0.0481672 -0.59319 
0.738317 -0.669537 -0.0812907 
0.571313 -0.807393 0.147369 
0.837941 -0.20103 -0.507387 
0.602624 -0.790172 0.111681 
0.81852 -0.0983614 -0.565995 
0.771519 -0.619393 -0.145296 
0.841477 -0.408157 -0.354011 
0.830574 -0.465339 -0.305952 
0.68601 -0.72759 0.00159231 
0.552692 -0.816922 0.164836 
0.814571 -0.519772 -0.257509 
0.503949 -0.836826 0.21391 
0.846386 -0.343169 -0.407265 
0.152962 -0.853798 0.497626 
0.301483 -0.8656 0.399805 
0.42487 -0.855499 0.295985 
0.720578 -0.690885 -0.058704 
0.377248 -0.862277 0.33788 
0.231592 -0.864162 0.446755 
0.812346 -0.0794575 -0.577738 
0.800907 -0.559512 -0.213291 
0.785676 -0.593403 -0.17489 
0.444334 -0.851892 0.277211 
0.699457 -0.714257 -0.0244393 
0.834804 -0.18374 -0.518981 
0.791061 -0.0160871 -0.611526 
0.845115 -0.239406 -0.477981 
0.845752 -0.281936 -0.453008 
0.792841 -0.0221685 -0.609025 
0.648677 -0.759496 0.0488376 
0.748092 -0.656841 -0.0944369 
0.477172 -0.844102 0.244537 
0.756469 -0.644647 -0.110383 
0.334272 -0.865892 0.372146 
0.149124 -0.852387 0.501196 
0.817789 -0.508565 -0.269411 
0.847256 -0.329972 -0.416264 
0.171556 -0.855315 0.488881 
0.254583 -0.863914 0.434558 
0.84205 -0.389593 -0.373053 
0.826427 -0.137816 -0.545917 
0.618586 -0.780115 0.0936589 
0.394531 -0.860723 0.321716 
0.801198 -0.0450288 -0.596703 
0.575643 -0.80527 0.142043 
0.830412 -0.455362 -0.321032 
0.803529 -0.551908 -0.223021 
0.147331 -0.851814 0.502698 
0.199295 -0.857433 0.474436 
0.596127 -0.793708 0.12108 
0.315205 -0.865946 0.388308 
0.507833 -0.835086 0.211513 
0.809367 -0.0663237 -0.583547 
0.157905 -0.850916 0.501008 
0.822121 -0.115076 -0.557561 
0.681515 -0.731779 0.00604796 
0.273447 -0.864159 0.42244 
0.455068 -0.849628 0.266543 
0.722147 -0.689119 -0.0601643 
0.775743 -0.612963 -0.149995 
0.147674 -0.851787 0.502644 
0.663528 -0.747469 0.0319459 
0.631704 -0.771114 0.079576 
0.840484 -0.214826 -0.49743 
0.787602 -0.589271 -0.180117 
0.821681 -0.49644 -0.27998 
0.421747 -0.856119 0.298648 
0.799073 -0.0392731 -0.59995 
0.542325 -0.821345 0.176853 
0.845155 -0.375245 -0.380663 
0.83366 -0.180742 -0.521865 
0.702597 -0.711097 -0.0264181 
0.832678 -0.441005 -0.334905 
0.795643 -0.0272717 -0.605151 
0.844898 -0.284596 -0.452938 
0.527179 -0.827324 0.193951 
0.488672 -0.840152 0.235253 
0.346667 -0.86588 0.360658 
0.810331 -0.53563 -0.23762 
0.845886 -0.317422 -0.428626 
0.219105 -0.860721 0.459513 
0.760773 -0.638396 -0.116941 
0.843322 -0.250439 -0.475488 
0.792768 -0.577803 -0.194068 
0.824473 -0.483799 -0.293569 
0.818833 -0.0977966 -0.565639 
0.738892 -0.668844 -0.0817732 
0.729845 -0.680227 -0.0679583 
0.390799 -0.859548 0.329324 
0.829032 -0.150669 -0.538521 
0.364306 -0.863686 0.34832 
0.148786 -0.850348 0.504748 
0.836576 -0.424401 -0.346446 
0.844655 -0.356218 -0.399583 
0.432671 -0.854287 0.288078 
0.277999 -0.86425 0.419271 
0.779905 -0.606852 -0.153228 
0.806007 -0.0619408 -0.588656 
0.313362 -0.867926 0.385367 
0.462974 -0.846177 0.263892 
0.638161 -0.767514 0.0606029 
0.68704 -0.726605 0.00458924 
0.166727 -0.853282 0.494077 
0.572121 -0.806667 0.148209 
0.234954 -0.86159 0.449954 
0.7976 -0.0274329 -0.602563 
0.709454 -0.703747 -0.037615 
0.144688 -0.848698 0.508701 
0.839564 -0.22421 -0.494836 
0.81247 -0.525908 -0.25162 
0.597537 -0.793706 0.113933 
0.550209 -0.817643 0.1695 
0.845303 -0.314408 -0.431985 
0.825923 -0.473205 -0.306477 
0.840594 -0.406049 -0.358505 
0.652031 -0.757012 0.0422779 
0.835172 -0.187054 -0.517203 
0.800767 -0.0366839 -0.597851 
0.796499 -0.56819 -0.20676 
0.151539 -0.851054 0.502735 
0.183814 -0.855187 0.484631 
0.498937 -0.837404 0.223195 
0.812134 -0.0794483 -0.578036 
0.763937 -0.633653 -0.122 
0.611676 -0.785137 0.0970123 
0.401145 -0.85865 0.319065 
0.522487 -0.828079 0.203204 
0.845539 -0.346254 -0.406414 
0.827222 -0.133808 -0.545709 
0.815584 -0.51557 -0.262699 
0.842612 -0.39172 -0.36954 
0.844634 -0.293407 -0.447779 
0.477029 -0.843621 0.24647 
0.318528 -0.868182 0.380526 
0.781212 -0.602104 -0.164858 
0.742814 -0.66394 -0.0860891 
0.844804 -0.262175 -0.466443 
0.283182 -0.865883 0.412377 
0.688432 -0.725298 -0.00198443 
0.82979 -0.457124 -0.320134 
0.574093 -0.805914 0.144635 
0.436591 -0.85352 0.284415 
0.205415 -0.858944 0.469063 
0.801648 -0.556746 -0.217704 
0.233736 -0.862322 0.449187 
0.71578 -0.697161 -0.0403167 
0.136578 -0.847959 0.512164 
0.34872 -0.864087 0.362972 
0.805754 -0.0615054 -0.589048 
0.724491 -0.686936 -0.0568502 
0.66222 -0.748515 0.0344901 
0.839471 -0.217998 -0.497761 
0.802735 -0.0410739 -0.59492 
0.833722 -0.172222 -0.52464 
0.820171 -0.501032 -0.276201 
0.15672 -0.851 0.501236 
0.630749 -0.772281 0.0757473 
0.785647 -0.593705 -0.173992 
0.821382 -0.11092 -0.559489 
0.14244 -0.848492 0.509679 
0.834181 -0.438022 -0.335081 
0.767486 -0.628045 -0.128551 
0.544782 -0.819595 0.177414 
0.163061 -0.853052 0.495695 
0.403464 -0.859881 0.312764 
0.845788 -0.331878 -0.417732 
0.532811 -0.823533 0.194694 
0.843584 -0.253014 -0.473655 
0.438842 -0.852611 0.283677 
0.806356 -0.545608 -0.228261 
0.580742 -0.802338 0.137811 
0.841926 -0.387708 -0.375291 
0.370004 -0.864058 0.341322 
0.800807 -0.0336219 -0.597978 
0.746968 -0.658787 -0.0896629 
0.815558 -0.0920992 -0.5713 
0.803924 -0.0504189 -0.592591 
0.325467 -0.86459 0.382824 
0.4903 -0.839415 0.234496 
0.838866 -0.421395 -0.344574 
0.476669 -0.844194 0.245199 
0.282253 -0.8651 0.414651 
0.823785 -0.486914 -0.290334 
0.797787 -0.0247112 -0.602432 
0.695274 -0.718692 -0.00870288 
0.608683 -0.786663 0.103276 
0.830403 -0.164698 -0.532265 
0.667833 -0.743784 0.0279941 
0.790852 -0.582663 -0.187234 
0.84304 -0.363798 -0.396149 
0.208368 -0.860195 0.465454 
0.633122 -0.770959 0.0691282 
0.24093 -0.860001 0.449834 
0.175568 -0.854939 0.488114 
0.846101 -0.303614 -0.438101 
0.813194 -0.527565 -0.245745 
0.84092 -0.215706 -0.496311 
0.723354 -0.688371 -0.0538918 
0.141097 -0.848138 0.51064 
0.705227 -0.708415 -0.0283353 
0.771384 -0.621217 -0.138042 
0.548231 -0.818474 0.171882 
0.827243 -0.474383 -0.301049 
0.130115 -0.845337 0.518146 
0.837184 -0.194438 -0.511191 
0.813088 -0.0830356 -0.576189 
0.59045 -0.796928 0.127569 
0.376787 -0.861946 0.339236 
0.405484 -0.859857 0.310206 
0.450942 -0.849642 0.273421 
0.147991 -0.849177 0.506948 
0.826945 -0.137255 -0.545274 
0.804019 -0.0450414 -0.592896 
0.334392 -0.865206 0.373632 
0.753292 -0.650145 -0.0993054 
0.505552 -0.834824 0.217912 
0.796671 -0.570684 -0.199086 
0.844982 -0.289594 -0.449602 
0.843801 -0.248138 -0.475844 
0.778978 -0.607571 -0.155086 
0.83912 -0.411697 -0.355504 
0.796549 -0.0225663 -0.604153 
0.643861 -0.762959 0.0577637 
0.281043 -0.864721 0.416259 
0.832487 -0.452888 -0.319153 
0.616398 -0.781873 0.0934267 
0.845863 -0.341016 -0.41015 
0.674058 -0.738371 0.0213095 
0.799571 -0.0290899 -0.599867 
0.824126 -0.119001 -0.553765 
0.81657 -0.517037 -0.256682 
0.250131 -0.86406 0.436847 
0.809852 -0.0726819 -0.582114 
0.730649 -0.679352 -0.0680607 
0.520573 -0.829702 0.20149 
0.840032 -0.399598 -0.366971 
0.691602 -0.722254 -0.0059521 
0.800357 -0.559754 -0.214719 
0.156442 -0.852127 0.499406 
0.172697 -0.855145 0.488777 
0.561504 -0.812711 0.155606 
0.468246 -0.845891 0.255369 
0.20025 -0.860098 0.469181 
0.754837 -0.646617 -0.110029 
0.844283 -0.369798 -0.387859 
0.132155 -0.845695 0.517044 
0.83337 -0.176857 -0.523656 
0.821868 -0.501086 -0.271007 
0.417685 -0.856816 0.302332 
0.585535 -0.800078 0.130478 
0.839132 -0.233868 -0.491084 
0.704106 -0.709818 -0.0198308 
0.845214 -0.325674 -0.423733 
0.339822 -0.86501 0.369159 
0.376046 -0.861824 0.340367 
0.136748 -0.846468 0.514579 
0.834885 -0.44282 -0.32692 
0.497705 -0.837112 0.227008 
0.799598 -0.0283946 -0.599864 
0.300339 -0.867372 0.396816 
0.441118 -0.853215 0.278278 
0.806321 -0.0493028 -0.589419 
0.818118 -0.0999238 -0.566302 
0.783148 -0.597968 -0.170628 
0.622911 -0.778153 0.0803782 
0.806187 -0.545984 -0.227957 
0.844712 -0.283345 -0.454068 
0.832249 -0.155106 -0.532263 
0.762798 -0.634381 -0.125299 
0.64987 -0.758409 0.0498587 
0.827024 -0.483919 -0.2861 
0.2552 -0.865621 0.430782 
0.536835 -0.822748 0.186799 
0.568422 -0.809202 0.148623 
0.733357 -0.675867 -0.0734244 
0.138882 -0.849435 0.509089 
0.213829 -0.861561 0.460424 
0.798243 -0.025704 -0.601787 
0.838846 -0.416757 -0.350216 
0.671303 -0.740766 0.0248842 
0.844138 -0.263169 -0.46709 
0.82613 -0.132517 -0.547676 
0.787611 -0.58795 -0.184349 
0.46601 -0.846327 0.258003 
0.167794 -0.855673 0.489561 
0.158053 -0.851989 0.499132 
0.804268 -0.0393329 -0.592964 
0.84354 -0.353714 -0.404136 
0.837061 -0.211437 -0.504602 
0.709145 -0.704261 -0.033591 
0.840492 -0.396565 -0.369201 
0.808648 -0.0599711 -0.585229 
0.68363 -0.729785 0.00807662 
0.81197 -0.531436 -0.241411 
0.600943 -0.79157 0.110837 
0.766426 -0.627328 -0.138028 
0.340351 -0.865878 0.366627 
0.413712 -0.858498 0.303025 
0.385133 -0.861107 0.331914 
0.504063 -0.836188 0.216126 
0.793073 -0.575961 -0.198253 
0.835339 -0.18617 -0.517251 
0.737621 -0.670012 -0.0836592 
0.845527 -0.322376 -0.425626 
0.547808 -0.817842 0.176182 
0.305547 -0.866173 0.395457 
0.817778 -0.51233 -0.262216 
0.267508 -0.867246 0.41991 
0.627803 -0.774419 0.0783516 
0.802002 -0.0350561 -0.596292 
0.825857 -0.481472 -0.293503 
0.442829 -0.852417 0.278006 
0.131261 -0.845812 0.517081 
0.221573 -0.863806 0.452487 
0.84224 -0.381191 -0.381215 
0.18465 -0.859754 0.47616 
0.567102 -0.810292 0.147723 
0.819157 -0.0980209 -0.565132 
0.834128 -0.447107 -0.322996 
0.842762 -0.25552 -0.473774 
0.806042 -0.0534126 -0.589443 
0.713989 -0.699027 -0.0397469 
0.833566 -0.162831 -0.527877 
0.687787 -0.725911 0.001585 
0.47519 -0.843796 0.249406 
0.137642 -0.848287 0.511336 
0.647624 -0.759497 0.0612072 
0.774281 -0.614 -0.153276 
0.845099 -0.301697 -0.441346 
0.799094 -0.563878 -0.208544 
0.743635 -0.661407 -0.0977143 
0.800282 -0.0350566 -0.598598 
0.828914 -0.14289 -0.540818 
0.154525 -0.850992 0.50193 
0.836072 -0.430122 -0.340555 
0.843192 -0.367989 -0.391933 
0.516874 -0.830154 0.209011 
0.603195 -0.789823 0.11107 
0.718156 -0.693732 -0.0546714 
0.353116 -0.864809 0.356951 
0.309898 -0.867377 0.389385 
0.840998 -0.218675 -0.494877 
0.660559 -0.749594 0.0420765 
0.384889 -0.862426 0.328759 
0.815678 -0.0878341 -0.571799 
0.801987 -0.0414225 -0.595903 
0.413489 -0.857512 0.306105 
0.819823 -0.505782 -0.268467 
0.234331 -0.864471 0.444723 
0.574375 -0.806731 0.138849 
0.780518 -0.600839 -0.17258 
0.805189 -0.548203 -0.226152 
0.445398 -0.851277 0.277395 
0.256604 -0.864935 0.431326 
0.749889 -0.652252 -0.110606 
0.536747 -0.82347 0.183846 
0.185562 -0.856516 0.48161 
0.132948 -0.847151 0.514451 
0.48355 -0.841252 0.241815 
0.835445 -0.415012 -0.360273 
0.838834 -0.205991 -0.50391 
0.690802 -0.723037 -0.00308831 
0.843966 -0.294003 -0.448647 
0.845967 -0.251637 -0.470126 
0.798323 -0.0288488 -0.601538 
0.618952 -0.779682 0.0948388 
0.72551 -0.684998 -0.0664357 
0.142989 -0.848714 0.509154 
0.844468 -0.338675 -0.414938 
0.824734 -0.48551 -0.289988 
0.833119 -0.457252 -0.311181 
0.668627 -0.743087 0.0275463 
0.841577 -0.392392 -0.371182 
0.825039 -0.134415 -0.548856 
0.156772 -0.852128 0.4993 
0.835638 -0.178612 -0.519429 
0.808288 -0.0622309 -0.585489 
0.639004 -0.765668 0.0736655 
0.756462 -0.64179 -0.125982 
0.422014 -0.856706 0.296578 
0.316744 -0.867501 0.383555 
0.784031 -0.595176 -0.176244 
0.279401 -0.867184 0.412223 
0.349872 -0.863452 0.363373 
0.794189 -0.57443 -0.198227 
0.454171 -0.848764 0.270794 
0.843367 -0.32602 -0.427134 
0.549111 -0.818605 0.168415 
0.707382 -0.70601 -0.0340748 
0.504887 -0.835412 0.217201 
0.807321 -0.539982 -0.238017 
0.58771 -0.798991 0.127318 
0.196325 -0.858991 0.472853 
0.376778 -0.863789 0.334525 
0.492599 -0.83959 0.228988 
0.807454 -0.0532039 -0.587527 
0.226145 -0.860479 0.456545 
0.765339 -0.627599 -0.142742 
0.84435 -0.244157 -0.476928 
0.731719 -0.676662 -0.0819461 
0.142385 -0.849024 0.508806 
0.8196 -0.10486 -0.563259 
0.842156 -0.380475 -0.382115 
0.832824 -0.445166 -0.328987 
0.846818 -0.289605 -0.446126 
0.81355 -0.524038 -0.252034 
0.57186 -0.807506 0.144606 
0.801152 -0.0415233 -0.597018 
0.130633 -0.847492 0.514482 
0.673748 -0.738707 0.0193605 
0.644962 -0.761999 0.05815 
0.709359 -0.703851 -0.0374697 
0.836158 -0.42208 -0.350269 
0.799155 -0.0328353 -0.600227 
0.612678 -0.783874 0.100829 
0.738871 -0.666978 -0.0959685 
0.153793 -0.852386 0.499786 
0.83239 -0.174266 -0.526079 
0.246603 -0.863584 0.439784 
0.840552 -0.218367 -0.49577 
0.515964 -0.831909 0.204229 
0.823507 -0.490105 -0.285714 
0.688993 -0.72475 -0.00507264 
0.797645 -0.566918 -0.205833 
0.418726 -0.856099 0.302925 
0.82661 -0.140945 -0.544841 
0.462286 -0.848665 0.257018 
0.842145 -0.365566 -0.396426 
0.767755 -0.623345 -0.1483 
0.281225 -0.867394 0.410535 
0.81328 -0.075417 -0.576965 
0.314243 -0.866692 0.387422 
0.717382 -0.694881 -0.0500258 
0.346427 -0.86498 0.363039 
0.382824 -0.862416 0.331187 
0.847225 -0.326593 -0.418983 
0.804802 -0.0544545 -0.59104 
0.135091 -0.848314 0.51197 
0.538376 -0.822457 0.183616 
0.838216 -0.408036 -0.361803 
0.196782 -0.855461 0.479023 
0.779799 -0.603153 -0.167689 
0.800935 -0.0393961 -0.597454 
0.747844 -0.654839 -0.109151 
0.587079 -0.798813 0.131282 
0.625981 -0.774958 0.0871055 
0.844111 -0.284197 -0.454652 
0.804074 -0.551412 -0.222284 
0.480753 -0.841457 0.246631 
0.144198 -0.850403 0.505986 
0.816211 -0.515131 -0.261611 
0.827877 -0.471335 -0.304078 
0.83255 -0.455554 -0.315168 
0.844124 -0.255067 -0.471589 
0.822995 -0.124903 -0.554147 
0.123837 -0.845777 0.518965 
0.802792 -0.0450219 -0.594556 
0.43187 -0.854953 0.287305 
0.563072 -0.811535 0.156081 
0.837584 -0.212564 -0.503259 
0.653565 -0.755115 0.0515124 
0.163444 -0.855276 0.49172 
0.690963 -0.722856 -0.00706902 
0.845612 -0.316703 -0.429697 
0.244474 -0.862929 0.44225 
0.720751 -0.69094 -0.055867 
0.211195 -0.860265 0.464048 
0.752621 -0.64793 -0.117255 
0.840582 -0.392917 -0.372877 
0.356886 -0.865393 0.351749 
0.835502 -0.182439 -0.518316 
0.667714 -0.744013 0.02455 
0.843987 -0.36842 -0.389812 
0.508771 -0.833443 0.215696 
0.279141 -0.866639 0.413543 
0.38769 -0.862542 0.325143 
0.69297 -0.720761 -0.0172345 
0.809397 -0.0652604 -0.583624 
0.834641 -0.439419 -0.332093 
0.831717 -0.159868 -0.531685 
0.783193 -0.595485 -0.178905 
0.135434 -0.848229 0.51202 
0.448271 -0.851099 0.273284 
0.3138 -0.864708 0.392185 
0.731454 -0.677621 -0.0761921 
0.801915 -0.0443143 -0.595792 
0.490848 -0.840549 0.229227 
0.793975 -0.574412 -0.199134 
0.765676 -0.627925 -0.139468 
0.600094 -0.791265 0.11742 
0.539858 -0.821547 0.183342 
0.819635 -0.102104 -0.563713 
0.628527 -0.773514 0.0814257 
0.146959 -0.851219 0.503815 
0.8198 -0.506265 -0.267627 
0.841632 -0.249365 -0.479033 
0.805498 -0.547705 -0.226257 
0.12708 -0.846404 0.517157 
0.17216 -0.855142 0.488972 
0.845608 -0.351488 -0.401751 
0.845139 -0.292658 -0.447316 
0.563444 -0.8114 0.155441 
0.825007 -0.484531 -0.290848 
0.70227 -0.711346 -0.0283561 
0.83789 -0.42368 -0.344145 
0.840287 -0.221471 -0.494842 
0.670609 -0.74141 0.024403 
0.418947 -0.857525 0.298554 
0.741065 -0.66471 -0.0947822 
0.459454 -0.849183 0.260367 
0.404643 -0.860678 0.309028 
0.2023 -0.859073 0.470178 
0.240283 -0.862858 0.444679 
0.357837 -0.865175 0.35132 
0.811333 -0.0662687 -0.580816 
0.845965 -0.328214 -0.42026 
0.840765 -0.400338 -0.364477 
0.770988 -0.61903 -0.149597 
0.829961 -0.150828 -0.537044 
0.642417 -0.763796 0.0625768 
0.31417 -0.865675 0.389749 
0.132413 -0.848515 0.512337 
0.681876 -0.731424 0.00793449 
0.71454 -0.698201 -0.0441486 
0.273657 -0.864264 0.42209 
0.510845 -0.832022 0.216279 
0.835649 -0.196283 -0.512996 
0.750589 -0.651296 -0.111489 
0.793501 -0.576048 -0.196277 
0.81904 -0.105476 -0.563957 
0.542128 -0.820848 0.179738 
0.596966 -0.793114 0.120841 
0.808205 -0.0599824 -0.585838 
0.151638 -0.853519 0.498509 
0.483329 -0.841997 0.239654 
0.827213 -0.471213 -0.306067 
0.186081 -0.856468 0.481494 
0.805254 -0.547795 -0.226907 
0.817207 -0.512672 -0.263324 
0.843631 -0.285592 -0.454668 
0.826696 -0.137327 -0.545632 
0.576186 -0.804439 0.144526 
0.774992 -0.611797 -0.158403 
0.840617 -0.389202 -0.376676 
0.431034 -0.855653 0.286475 
0.724252 -0.686974 -0.0593823 
0.842435 -0.256698 -0.473718 
0.130049 -0.847244 0.515039 
0.612687 -0.783791 0.101422 
0.360213 -0.866966 0.344408 
0.84577 -0.325251 -0.422948 
0.685036 -0.728508 -0.000980961 
0.138751 -0.849958 0.508251 
0.829956 -0.456807 -0.320156 
0.844339 -0.364186 -0.393013 
0.837605 -0.431066 -0.335559 
0.238968 -0.863108 0.444904 
0.840287 -0.232996 -0.48952 
0.642867 -0.763739 0.0585132 
0.278707 -0.867542 0.411938 
0.203307 -0.859567 0.46884 
0.450855 -0.850773 0.270027 
0.315609 -0.86816 0.383 
0.696925 -0.716986 -0.0150612 
0.756322 -0.643753 -0.116443 
0.397534 -0.860227 0.319338 
0.817631 -0.0842699 -0.569542 
0.734397 -0.674268 -0.077616 
0.79528 -0.571759 -0.201549 
0.835693 -0.194147 -0.513736 
0.818674 -0.505449 -0.272571 
0.161392 -0.853636 0.495235 
0.543633 -0.819498 0.181346 
0.811866 -0.0722697 -0.579353 
0.654677 -0.754742 0.0419834 
0.765121 -0.630161 -0.132241 
0.511282 -0.833736 0.208507 
0.833432 -0.163882 -0.527763 
0.780604 -0.600297 -0.174071 
0.804606 -0.549247 -0.225691 
0.48703 -0.839224 0.241879 
0.61554 -0.782421 0.0944847 
0.838295 -0.419147 -0.348679 
0.823645 -0.115474 -0.555224 
0.575168 -0.805359 0.143455 
0.712608 -0.700593 -0.0368713 
0.130688 -0.848698 0.512477 
0.172006 -0.854705 0.48979 
0.807137 -0.0623496 -0.587062 
0.845071 -0.354425 -0.400297 
0.846669 -0.31335 -0.430074 
0.843534 -0.288027 -0.453311 
0.331206 -0.867887 0.370235 
0.843787 -0.267169 -0.46545 
0.248291 -0.863576 0.438849 
0.823444 -0.486555 -0.291897 
0.363553 -0.86322 0.350259 
0.666948 -0.744676 0.0252495 
0.136777 -0.851761 0.505761 
0.420362 -0.855893 0.301234 
0.208229 -0.860974 0.464074 
0.84112 -0.397352 -0.366917 
0.584866 -0.800219 0.132595 
0.715413 -0.697133 -0.0467877 
0.462717 -0.847252 0.260877 
0.280407 -0.865107 0.415886 
0.735453 -0.672747 -0.0807446 
0.406356 -0.859625 0.309711 
0.841199 -0.230723 -0.489031 
0.830049 -0.463229 -0.310545 
0.832731 -0.152258 -0.532332 
0.795442 -0.57257 -0.198582 
0.805189 -0.0521313 -0.590722 
0.133577 -0.848149 0.51264 
0.808296 -0.536383 -0.242799 
0.547755 -0.818313 0.174151 
0.767157 -0.626636 -0.137107 
0.782135 -0.598741 -0.172549 
0.616197 -0.782446 0.0898871 
0.817489 -0.0944387 -0.568149 
0.677009 -0.735899 0.0105695 
0.512263 -0.831785 0.213822 
0.689886 -0.723882 -0.00724911 
0.83894 -0.203842 -0.504606 
0.748555 -0.654738 -0.104797 
0.14502 -0.850309 0.505909 
0.483297 -0.84198 0.23978 
0.812618 -0.079319 -0.577374 
0.369084 -0.864319 0.341657 
0.808828 -0.0665891 -0.584262 
0.176515 -0.855451 0.486874 
0.256374 -0.863046 0.435229 
0.8426 -0.386619 -0.374901 
0.630992 -0.77264 0.0698344 
0.844636 -0.349442 -0.405562 
0.813148 -0.521123 -0.259271 
0.291059 -0.867779 0.402797 
0.825864 -0.128191 -0.549105 
0.433427 -0.8538 0.288385 
0.591278 -0.795783 0.130844 
0.212679 -0.859539 0.464715 
0.842615 -0.300997 -0.446542 
0.832284 -0.448561 -0.325724 
0.325818 -0.865903 0.379545 
0.844837 -0.315875 -0.431826 
0.824748 -0.489791 -0.282659 
0.845791 -0.269522 -0.460429 
0.555745 -0.814415 0.166962 
0.796889 -0.566859 -0.208899 
0.461153 -0.847763 0.261984 
0.717089 -0.695143 -0.0505921 
0.838967 -0.183285 -0.512387 
0.693702 -0.720107 -0.0149723 
0.140141 -0.850501 0.506961 
0.768654 -0.623494 -0.142919 
0.187888 -0.857869 0.478288 
0.39511 -0.86096 0.320369 
0.159826 -0.852434 0.497808 
0.83564 -0.430825 -0.340729 
0.643866 -0.763444 0.0508971 
0.845874 -0.250682 -0.470803 
0.835615 -0.153777 -0.527351 
0.781248 -0.600664 -0.169866 
0.268517 -0.865075 0.423727 
0.525224 -0.827642 0.197857 
0.727189 -0.683104 -0.0675652 
0.749062 -0.653717 -0.107519 
0.827537 -0.476774 -0.296428 
0.823183 -0.105278 -0.55793 
0.343824 -0.864375 0.366935 
0.534506 -0.824097 0.187531 
0.59027 -0.797886 0.122308 
0.802496 -0.551902 -0.226725 
0.485006 -0.84175 0.237121 
0.214531 -0.858946 0.464961 
0.842394 -0.383757 -0.378289 
0.436372 -0.852816 0.286852 
0.367087 -0.863412 0.346075 
0.668695 -0.743149 0.0240238 
0.809487 -0.0659497 -0.583423 
0.815995 -0.0838588 -0.571944 
0.84214 -0.222608 -0.491167 
0.845025 -0.351531 -0.402937 
0.609413 -0.786823 0.0975958 
0.836799 -0.42105 -0.349978 
0.813339 -0.526021 -0.24856 
0.286259 -0.867467 0.406887 
0.830352 -0.140981 -0.539109 
0.14198 -0.850589 0.5063 
0.673078 -0.739423 0.0148359 
0.564162 -0.810748 0.156237 
0.649351 -0.759077 0.0463249 
0.168212 -0.853064 0.49395 
0.695193 -0.718499 -0.0216003 
0.844546 -0.318747 -0.430281 
0.40809 -0.858147 0.311524 
0.731427 -0.677712 -0.0756391 
0.784757 -0.591845 -0.184054 
0.458512 -0.848262 0.264987 
0.846883 -0.297818 -0.440561 
0.830635 -0.461858 -0.31102 
0.197773 -0.858321 0.473467 
0.763231 -0.631992 -0.134405 
0.83903 -0.192649 -0.508837 
0.754376 -0.646129 -0.115902 
0.619068 -0.781086 0.0816079 
0.313191 -0.865088 0.391834 
0.227672 -0.86258 0.451799 
0.710175 -0.702989 -0.0381741 
0.541347 -0.82061 0.183145 
0.818971 -0.510903 -0.261274 
0.846714 -0.281289 -0.451611 
0.492553 -0.838593 0.23271 
0.8247 -0.0987163 -0.556889 
0.259851 -0.86393 0.431397 
0.146236 -0.848958 0.507824 
0.829947 -0.132761 -0.541814 
0.331135 -0.864681 0.377725 
0.374652 -0.863973 0.336431 
0.786734 -0.587153 -0.190527 
0.844253 -0.257137 -0.470232 
0.1685 -0.85392 0.492371 
0.833236 -0.449458 -0.322034 
0.803262 -0.55324 -0.22067 
0.842264 -0.38661 -0.375665 
0.681915 -0.731413 0.00523615 
0.574007 -0.805931 0.144883 
0.504483 -0.836092 0.215515 
0.817643 -0.0870166 -0.569112 
0.824581 -0.492878 -0.277737 
0.838999 -0.416333 -0.350354 
0.134297 -0.847417 0.513663 
0.81194 -0.0665571 -0.579934 
0.815895 -0.0761082 -0.573169 
0.735485 -0.672468 -0.082759 
0.42188 -0.855295 0.300811 
0.774108 -0.614248 -0.153154 
0.835718 -0.177546 -0.519666 
0.845645 -0.357705 -0.396147 
0.194418 -0.859666 0.472414 
0.844769 -0.235869 -0.480344 
0.458415 -0.848181 0.265414 
0.655115 -0.754197 0.0448364 
0.580654 -0.803426 0.13171 
0.405368 -0.857925 0.315661 
0.275477 -0.86525 0.418872 
0.623236 -0.77787 0.0805959 
0.713747 -0.698644 -0.0496166 
0.634474 -0.770681 0.0591118 
0.803297 -0.550044 -0.228398 
0.845153 -0.333451 -0.417765 
0.689114 -0.724556 -0.0118794 
0.550053 -0.817026 0.172949 
0.750036 -0.652135 -0.110298 
0.149815 -0.849243 0.506301 
0.849351 -0.310863 -0.426576 
0.172512 -0.854415 0.490118 
0.228809 -0.861138 0.453969 
0.300961 -0.864326 0.402942 
0.82655 -0.479218 -0.295236 
0.82953 -0.129728 -0.543186 
0.843885 -0.208981 -0.49415 
0.822455 -0.103676 -0.559302 
0.772573 -0.613845 -0.16225 
0.742552 -0.663016 -0.095011 
0.595606 -0.795684 0.110189 
0.339709 -0.864615 0.370187 
0.511127 -0.833119 0.211336 
0.371066 -0.863404 0.341824 
0.835163 -0.167553 -0.52386 
0.812136 -0.52975 -0.244539 
0.847125 -0.290202 -0.445154 
0.472579 -0.845524 0.248511 
0.833142 -0.447498 -0.324993 
0.430926 -0.853352 0.293418 
0.659571 -0.750796 0.0356642 
0.195152 -0.856432 0.477953 
0.787075 -0.588212 -0.185794 
0.843495 -0.392976 -0.366178 
0.812023 -0.0680139 -0.579648 
0.845989 -0.268785 -0.460497 
0.813471 -0.0720064 -0.577131 
0.837226 -0.424086 -0.345259 
0.141303 -0.849696 0.507986 
0.236255 -0.863788 0.445032 
0.758472 -0.639375 -0.126175 
0.715277 -0.697342 -0.045745 
0.818501 -0.0875206 -0.5678 
0.156444 -0.850257 0.502582 
0.846824 -0.36448 -0.387355 
0.564093 -0.8109 0.155694 
0.452366 -0.849159 0.272569 
0.81775 -0.509994 -0.266816 
0.670192 -0.741887 0.0211339 
0.400344 -0.859222 0.318531 
0.692667 -0.721098 -0.015174 
0.842223 -0.206094 -0.498182 
0.266023 -0.86475 0.425957 
0.168536 -0.853801 0.492564 
0.522341 -0.829108 0.199349 
0.830095 -0.148828 -0.537395 
0.619429 -0.780347 0.0858251 
0.636114 -0.768881 0.0646547 
0.79193 -0.57699 -0.199822 
0.377409 -0.863054 0.335709 
0.305921 -0.866128 0.395265 
0.568907 -0.80979 0.143473 
0.84779 -0.344462 -0.403235 
0.845759 -0.24215 -0.475453 
0.146474 -0.850148 0.50576 
0.828101 -0.478835 -0.29149 
0.800745 -0.558467 -0.216614 
0.536377 -0.823155 0.186319 
0.739023 -0.668243 -0.0854225 
0.480362 -0.843385 0.240737 
0.827389 -0.12371 -0.547835 
0.336277 -0.86441 0.373781 
0.204256 -0.859198 0.469105 
0.759826 -0.635407 -0.137554 
0.592923 -0.796751 0.116747 
0.679161 -0.733924 0.00976704 
0.724343 -0.687009 -0.057841 
0.835514 -0.443462 -0.324434 
0.848163 -0.323781 -0.419268 
0.774527 -0.612399 -0.158353 
0.811692 -0.0721344 -0.579614 
0.849615 -0.301227 -0.432917 
0.838231 -0.188307 -0.511771 
0.695088 -0.71863 -0.0205726 
0.154381 -0.851434 0.501225 
0.844135 -0.389926 -0.367959 
0.422457 -0.855511 0.299384 
0.805865 -0.54408 -0.233577 
0.81624 -0.0813422 -0.571958 
0.178417 -0.856717 0.483945 
0.840016 -0.423981 -0.338546 
0.844157 -0.238349 -0.480197 
0.217692 -0.862866 0.45615 
0.847239 -0.368663 -0.382458 
0.649444 -0.758914 0.0476664 
0.82317 -0.112535 -0.556531 
0.819348 -0.509385 -0.263052 
0.451997 -0.849152 0.273205 
0.273521 -0.864758 0.421164 
0.742468 -0.662861 -0.0967289 
0.393975 -0.859215 0.326395 
0.61119 -0.785542 0.096796 
0.345822 -0.865245 0.362984 
0.54728 -0.819785 0.168632 
0.778927 -0.603271 -0.171278 
0.305515 -0.863116 0.402108 
0.486828 -0.841405 0.234597 
0.834096 -0.16139 -0.527481 
0.374844 -0.861455 0.342618 
0.846283 -0.286124 -0.449375 
0.150635 -0.849803 0.505118 
0.160311 -0.85346 0.495889 
0.237815 -0.864078 0.443636 
0.809686 -0.0697136 -0.582708 
0.682903 -0.730504 0.00278595 
0.56613 -0.810595 0.149776 
0.788597 -0.585506 -0.187876 
0.509531 -0.833999 0.211717 
0.137073 -0.847786 0.512318 
0.82757 -0.478299 -0.293866 
0.654201 -0.755002 0.0446411 
0.722838 -0.688786 -0.0554925 
0.625739 -0.775828 0.0808781 
0.704301 -0.709402 -0.0266153 
0.846256 -0.358713 -0.393923 
0.586831 -0.800104 0.124352 
0.816393 -0.0845681 -0.571271 
0.756419 -0.642005 -0.125139 
0.190751 -0.857727 0.477408 
0.829477 -0.146376 -0.539019 
0.810281 -0.534978 -0.239253 
0.848045 -0.334261 -0.411205 
0.793023 -0.575267 -0.200455 
0.4591 -0.848112 0.264448 
0.833609 -0.457238 -0.309887 
0.843035 -0.231178 -0.485643 
0.819698 -0.100856 -0.563847 
0.840803 -0.200719 -0.502755 
0.422493 -0.856503 0.296481 
0.747118 -0.656862 -0.101721 
0.516923 -0.831243 0.204516 
0.848182 -0.27393 -0.453376 
0.148024 -0.850701 0.504378 
0.842671 -0.405756 -0.353932 
0.314079 -0.865055 0.391196 
0.267007 -0.862839 0.429205 
0.836964 -0.432472 -0.335349 
0.161076 -0.854815 0.493301 
0.813208 -0.0794455 -0.576525 
0.816967 -0.513051 -0.263332 
0.201809 -0.860637 0.467522 
0.725972 -0.684644 -0.0650131 
0.764633 -0.628216 -0.14381 
0.340708 -0.866242 0.365435 
0.390268 -0.860515 0.327421 
0.685731 -0.727852 -0.00204474 
0.844621 -0.387021 -0.369906 
0.847462 -0.318091 -0.425001 
0.625937 -0.77623 0.0752931 
0.835805 -0.178156 -0.519317 
0.658399 -0.751992 0.0319268 
0.363012 -0.862264 0.353162 
0.241499 -0.860121 0.449299 
0.590271 -0.798479 0.118369 
0.476705 -0.844274 0.244856 
0.796288 -0.566964 -0.210895 
0.53602 -0.823772 0.184613 
0.56271 -0.811904 0.155466 
0.772969 -0.614386 -0.158266 
0.828646 -0.136003 -0.543 
0.141845 -0.849847 0.507583 
0.152032 -0.852441 0.50023 
0.704541 -0.709132 -0.027445 
0.290317 -0.862777 0.413922 
0.816957 -0.0914792 -0.569397 
0.430757 -0.853552 0.293083 
0.847458 -0.363201 -0.38717 
0.846552 -0.268148 -0.459833 
0.821285 -0.49761 -0.279061 
0.806891 -0.542714 -0.233213 
0.180192 -0.855515 0.485411 
0.84255 -0.235166 -0.484569 
0.81149 -0.0736397 -0.579708 
0.489342 -0.840005 0.234386 
0.780143 -0.601579 -0.171696 
0.598204 -0.793763 0.109969 
0.830584 -0.465038 -0.306383 
0.743724 -0.660767 -0.101299 
0.810695 -0.0703531 -0.581226 
0.45087 -0.849906 0.272719 
0.816249 -0.085862 -0.571284 
0.635798 -0.769356 0.0620696 
0.308835 -0.865618 0.394115 
0.841644 -0.215716 -0.495078 
0.729009 -0.680511 -0.0738294 
0.847645 -0.299458 -0.437976 
0.51376 -0.830814 0.214007 
0.20658 -0.857715 0.470797 
0.397562 -0.859975 0.319979 
0.836581 -0.430307 -0.33907 
0.705884 -0.707314 -0.0378846 
0.250813 -0.861794 0.440913 
0.141153 -0.849835 0.507796 
0.658798 -0.751623 0.0323756 
0.814289 -0.0830689 -0.574485 
0.846725 -0.353849 -0.397301 
0.335295 -0.863463 0.376839 
0.163926 -0.853744 0.494216 
0.835554 -0.180064 -0.519063 
0.562468 -0.812245 0.15456 
0.367873 -0.862856 0.346625 
0.815632 -0.51668 -0.260358 
0.68095 -0.732327 0.00205238 
0.754513 -0.64488 -0.121817 
0.838863 -0.419155 -0.3473 
0.827242 -0.1381 -0.544609 
0.138048 -0.848259 0.511272 
0.785065 -0.591863 -0.182679 
0.533257 -0.825551 0.184668 
0.847842 -0.327372 -0.417123 
0.790561 -0.579693 -0.197405 
0.619067 -0.780231 0.0894229 
0.188318 -0.855914 0.48161 
0.216562 -0.858431 0.464971 
0.820881 -0.109612 -0.560481 
0.573903 -0.806489 0.142167 
0.143976 -0.84965 0.507313 
0.841183 -0.402286 -0.361355 
0.458068 -0.848936 0.263592 
0.6398 -0.766246 0.0593495 
0.841604 -0.207921 -0.498469 
0.280089 -0.863021 0.420411 
0.845873 -0.276019 -0.456412 
0.767169 -0.626742 -0.136547 
0.844184 -0.251403 -0.473444 
0.806902 -0.544393 -0.229228 
0.810621 -0.0724436 -0.581073 
0.824045 -0.493075 -0.278974 
0.709018 -0.70397 -0.041473 
0.409969 -0.858767 0.307319 
0.740838 -0.66506 -0.0940969 
0.831387 -0.465806 -0.303019 
0.483445 -0.841987 0.239456 
0.511168 -0.832759 0.212651 
0.305202 -0.864922 0.398449 
0.688371 -0.725296 -0.00950069 
0.726969 -0.682654 -0.0741579 
0.592469 -0.797069 0.116883 
0.845946 -0.319454 -0.426994 
0.812616 -0.0779205 -0.577568 
0.162936 -0.85243 0.496806 
0.255 -0.861967 0.438165 
0.818736 -0.0962793 -0.56604 
0.37026 -0.862262 0.345559 
0.332013 -0.86574 0.374516 
0.652973 -0.756499 0.0365565 
0.833829 -0.17906 -0.522175 
0.192179 -0.854986 0.481733 
0.386752 -0.860937 0.33047 
0.834216 -0.449704 -0.319139 
0.429383 -0.854853 0.291302 
0.536358 -0.822971 0.187188 
0.84444 -0.387083 -0.370254 
0.815827 -0.517586 -0.257935 
0.765544 -0.626287 -0.147336 
0.617525 -0.781211 0.0915065 
0.830283 -0.141051 -0.539198 
0.788703 -0.584642 -0.190108 
0.215571 -0.858087 0.466064 
0.145832 -0.850497 0.505358 
0.837363 -0.432958 -0.333723 
0.847817 -0.34964 -0.398696 
0.843051 -0.244932 -0.478824 
0.818229 -0.0968041 -0.566683 
0.74522 -0.658251 -0.106549 
0.177339 -0.852697 0.491385 
0.77726 -0.606345 -0.167968 
0.551447 -0.817049 0.16834 
0.68708 -0.726498 -0.0110067 
0.638477 -0.767192 0.0613533 
0.841099 -0.206538 -0.499895 
0.663043 -0.748246 0.0224069 
0.811681 -0.0765877 -0.579058 
0.845439 -0.278901 -0.455464 
0.823533 -0.494544 -0.277883 
0.455097 -0.849222 0.267784 
0.518113 -0.829384 0.209001 
0.847354 -0.307527 -0.432919 
0.703674 -0.709268 -0.0422105 
0.272421 -0.865653 0.420039 
0.306371 -0.864192 0.399135 
0.829105 -0.127628 -0.54433 
0.563596 -0.811862 0.152446 
0.592042 -0.797231 0.117937 
0.802447 -0.553869 -0.222055 
0.47875 -0.84411 0.241404 
0.723099 -0.687481 -0.0670614 
0.394767 -0.860186 0.322861 
0.839435 -0.419068 -0.34602 
0.245822 -0.861287 0.444698 
0.333438 -0.86416 0.376891 
0.194237 -0.855036 0.480818 
0.752381 -0.647907 -0.11891 
0.844508 -0.384623 -0.372655 
0.827229 -0.479427 -0.292987 
0.834173 -0.171327 -0.524216 
0.357398 -0.863344 0.356236 
0.796092 -0.570921 -0.200716 
0.429659 -0.85456 0.291753 
0.814763 -0.52399 -0.248183 
0.817137 -0.0902185 -0.56934 
0.614091 -0.783661 0.0936291 
0.67246 -0.740099 0.00707683 
0.645352 -0.76225 0.0499551 
0.831058 -0.459299 -0.313666 
0.821871 -0.11147 -0.558662 
0.811278 -0.0772794 -0.579531 
0.846416 -0.345013 -0.405643 
0.845476 -0.275138 -0.457679 
0.730622 -0.678204 -0.0789393 
0.207823 -0.857229 0.471135 
0.519613 -0.830319 0.201429 
0.845166 -0.247361 -0.473822 
0.149959 -0.850076 0.504859 
0.830389 -0.162033 -0.533103 
0.779555 -0.60254 -0.170998 
0.491602 -0.838817 0.233907 
0.443911 -0.852651 0.275554 
0.761824 -0.634532 -0.130356 
0.840998 -0.20874 -0.499149 
0.596892 -0.794078 0.114721 
0.175599 -0.853412 0.490768 
0.270488 -0.863274 0.42614 
0.687016 -0.726572 -0.0100833 
0.56881 -0.809101 0.147687 
0.841103 -0.411142 -0.351435 
0.812827 -0.0816754 -0.576751 
0.157259 -0.851615 0.500022 
0.70758 -0.705314 -0.0431639 
0.845389 -0.303342 -0.439659 
0.819647 -0.506359 -0.267916 
0.533843 -0.825134 0.184839 
0.800128 -0.559606 -0.215953 
0.30005 -0.866317 0.39933 
0.391969 -0.861918 0.321649 
0.834466 -0.443987 -0.326408 
0.624815 -0.776308 0.0833831 
0.358801 -0.864061 0.353072 
0.24312 -0.86196 0.444879 
0.828408 -0.139966 -0.542356 
0.649969 -0.758616 0.0451974 
0.736922 -0.669709 -0.0918459 
0.185502 -0.854657 0.484923 
0.324936 -0.863834 0.384977 
0.844927 -0.379689 -0.376743 
0.415993 -0.858341 0.300333 
0.817985 -0.0957077 -0.567221 
0.837724 -0.200641 -0.507899 
0.823063 -0.49684 -0.275169 
0.792014 -0.579818 -0.191114 
0.458391 -0.849121 0.262434 
0.710474 -0.70203 -0.0487808 
0.846631 -0.340437 -0.409045 
0.810953 -0.533301 -0.240717 
0.819149 -0.10767 -0.563385 
0.491984 -0.839634 0.230143 
0.844376 -0.248683 -0.474537 
0.57179 -0.807517 0.144821 
0.764698 -0.628498 -0.142227 
0.659474 -0.751243 0.0269772 
0.846567 -0.286055 -0.448885 
0.591534 -0.79722 0.120533 
0.744199 -0.660112 -0.102075 
0.812339 -0.0768104 -0.578104 
0.206719 -0.85772 0.470726 
0.177082 -0.853459 0.490152 
0.778228 -0.606634 -0.162345 
0.830403 -0.470544 -0.298361 
0.624802 -0.77708 0.0759567 
0.841082 -0.415798 -0.345967 
0.836693 -0.181749 -0.516635 
0.685755 -0.727771 -0.00948055 
0.262036 -0.86409 0.429751 
0.151812 -0.851266 0.502294 
0.719939 -0.691507 -0.0592095 
0.834784 -0.440717 -0.330006 
0.508443 -0.834473 0.212466 
0.383513 -0.86167 0.332328 
0.542407 -0.821452 0.1761 
0.810411 -0.0700885 -0.581654 
0.84536 -0.326567 -0.422754 
0.829316 -0.141956 -0.540447 
0.800921 -0.561628 -0.207604 
0.323294 -0.866991 0.379221 
0.842745 -0.237942 -0.482871 
0.428525 -0.856066 0.288992 
0.29127 -0.866569 0.405241 
0.344847 -0.86482 0.364921 
0.234959 -0.861408 0.450301 
0.464032 -0.847719 0.256994 
0.815225 -0.523973 -0.246699 
0.843956 -0.378578 -0.380023 
0.166679 -0.851739 0.496749 
0.812406 -0.0799532 -0.577584 
0.183707 -0.855802 0.483586 
0.594425 -0.796103 0.113488 
0.692509 -0.721154 -0.0191858 
0.641007 -0.765417 0.0569715 
0.831253 -0.46295 -0.307728 
0.746677 -0.656212 -0.108903 
0.518055 -0.831141 0.202049 
0.82396 -0.111583 -0.555553 
0.816087 -0.0971655 -0.569703 
0.789151 -0.5864 -0.182691 
0.724 -0.685896 -0.0732864 
0.821067 -0.50501 -0.266109 
0.84118 -0.408006 -0.35489 
0.625256 -0.776929 0.0737324 
0.398991 -0.85991 0.318373 
0.779165 -0.604265 -0.16663 
0.666005 -0.745725 0.0182011 
0.837859 -0.184071 -0.513917 
0.845272 -0.361677 -0.393327 
0.845327 -0.290185 -0.448569 
0.208337 -0.8585 0.468586 
0.838754 -0.217849 -0.499034 
0.756187 -0.642177 -0.12566 
0.804691 -0.552326 -0.217736 
0.558119 -0.813815 0.16189 
0.84552 -0.273541 -0.458554 
0.699349 -0.714053 -0.0322478 
0.475866 -0.844946 0.244169 
0.171573 -0.853002 0.492899 
0.546434 -0.819513 0.172653 
0.358282 -0.863922 0.353939 
0.150799 -0.85066 0.503625 
0.814668 -0.0881616 -0.573187 
0.287426 -0.868835 0.403127 
0.437815 -0.852677 0.285061 
0.846204 -0.323953 -0.423075 
0.835598 -0.43973 -0.329263 
0.246668 -0.863327 0.440251 
0.57765 -0.804239 0.139716 
0.602698 -0.791339 0.102657 
0.827844 -0.139068 -0.543447 
0.316163 -0.865342 0.388875 
0.730256 -0.678695 -0.0780934 
0.67617 -0.73673 0.00488233 
0.824469 -0.491478 -0.280537 
0.186874 -0.856116 0.481814 
0.843299 -0.252955 -0.474194 
0.493293 -0.839499 0.227824 
0.645679 -0.761863 0.0516126 
0.829786 -0.469363 -0.301916 
0.214149 -0.86134 0.460689 
0.402412 -0.859531 0.315072 
0.163438 -0.851878 0.497585 
0.812203 -0.532422 -0.238439 
0.794041 -0.578706 -0.186006 
0.520617 -0.830355 0.198667 
0.842086 -0.392955 -0.369428 
0.708471 -0.704481 -0.0421436 
0.815463 -0.0829614 -0.572833 
0.74191 -0.662704 -0.101945 
0.448617 -0.851255 0.272225 
0.763607 -0.631698 -0.133644 
0.833771 -0.17674 -0.523057 
0.17294 -0.854397 0.489997 
0.820151 -0.11281 -0.560915 
0.627021 -0.774776 0.0810383 
0.845644 -0.360463 -0.39364 
0.840547 -0.222056 -0.494138 
0.364829 -0.864609 0.345472 
0.252839 -0.864116 0.435174 
0.6809 -0.732376 -0.000597686 
0.8485 -0.29693 -0.438042 
0.77844 -0.607753 -0.157056 
0.840202 -0.418332 -0.345048 
0.578143 -0.804641 0.135291 
0.190803 -0.857556 0.477694 
0.652325 -0.756865 0.0403416 
0.80139 -0.55861 -0.213846 
0.534112 -0.824971 0.184788 
0.322787 -0.867975 0.377396 
0.606291 -0.788733 0.101542 
0.17004 -0.852969 0.493489 
0.823961 -0.128201 -0.551953 
0.818541 -0.0965081 -0.566283 
0.843261 -0.251383 -0.475098 
0.71166 -0.70099 -0.046402 
0.282366 -0.866368 0.411919 
0.463796 -0.847307 0.258775 
0.726174 -0.684222 -0.0671625 
0.844742 -0.336656 -0.416022 
0.216763 -0.859621 0.462673 
0.412851 -0.85797 0.305681 
0.830776 -0.461023 -0.31188 
0.490587 -0.840103 0.231412 
0.815277 -0.519635 -0.255543 
0.692313 -0.721509 -0.011321 
0.821231 -0.502592 -0.270151 
0.549823 -0.818817 0.165022 
0.512966 -0.833172 0.206615 
0.846689 -0.285353 -0.4491 
0.746315 -0.657099 -0.10599 
0.368609 -0.865203 0.339929 
0.176021 -0.85501 0.487826 
0.839391 -0.212848 -0.500119 
0.658832 -0.751746 0.0286003 
0.842009 -0.411673 -0.348634 
0.835116 -0.178412 -0.520337 
0.782464 -0.600895 -0.163325 
0.623213 -0.777347 0.0856571 
0.291287 -0.867052 0.404194 
0.760031 -0.637326 -0.127153 
0.805529 -0.550241 -0.219903 
0.844376 -0.366326 -0.390941 
0.821635 -0.119055 -0.557443 
0.843077 -0.392252 -0.367913 
0.816949 -0.0909675 -0.56949 
0.336915 -0.865023 0.371783 
0.580854 -0.802796 0.134636 
0.243699 -0.86378 0.441016 
0.788226 -0.589397 -0.176951 
0.416612 -0.85816 0.299993 
0.200285 -0.859124 0.470948 
0.824858 -0.487879 -0.285628 
0.832513 -0.451664 -0.320815 
0.844736 -0.326399 -0.424128 
0.690305 -0.723425 -0.0116289 
0.733441 -0.675232 -0.078267 
0.46409 -0.847114 0.258879 
0.670448 -0.741765 0.0168726 
0.18499 -0.859036 0.477322 
0.556104 -0.815799 0.158808 
0.81498 -0.0849066 -0.573235 
0.842192 -0.257574 -0.473675 
0.708766 -0.704429 -0.03782 
0.630344 -0.773154 0.0699899 
0.818534 -0.11006 -0.563816 
0.596164 -0.794567 0.115115 
0.370522 -0.864831 0.338793 
0.213051 -0.861771 0.460391 
0.171109 -0.854651 0.490198 
0.829508 -0.155969 -0.536274 
0.481292 -0.842738 0.241142 
0.518772 -0.830277 0.203752 
0.764934 -0.62961 -0.135891 
0.846674 -0.290268 -0.445968 
0.814894 -0.525701 -0.244103 
0.303446 -0.865059 0.399491 
0.838397 -0.21393 -0.501322 
0.257073 -0.864359 0.432199 
0.439072 -0.852782 0.282807 
0.84736 -0.354172 -0.395656 
0.341725 -0.86498 0.36747 
0.828686 -0.478623 -0.290173 
0.845673 -0.317235 -0.429185 
0.171162 -0.855929 0.487944 
0.791083 -0.583196 -0.184582 
0.743811 -0.661054 -0.0987586 
0.812398 -0.0785166 -0.577792 
0.529184 -0.827366 0.188229 
0.381164 -0.863245 0.330941 
0.805731 -0.551005 -0.217233 
0.676661 -0.736243 0.00877012 
0.206275 -0.86143 0.4641 
0.839017 -0.426939 -0.337304 
0.817949 -0.09867 -0.566766 
0.827565 -0.143393 -0.542747 
0.844792 -0.240629 -0.477937 
0.643644 -0.76373 0.0493964 
0.774498 -0.615009 -0.148042 
0.83301 -0.444348 -0.32962 
0.71361 -0.698953 -0.047174 
0.841128 -0.397751 -0.366466 
0.572129 -0.807541 0.143338 
0.837121 -0.19464 -0.511218 
0.226122 -0.863868 0.450113 
0.599362 -0.792809 0.110542 
0.815225 -0.520831 -0.253265 
0.483326 -0.843036 0.23598 
0.188101 -0.859064 0.476054 
0.696373 -0.717527 -0.0148489 
0.450658 -0.851127 0.269239 
0.845315 -0.345365 -0.407633 
0.729373 -0.680904 -0.0662172 
0.750207 -0.65282 -0.104953 
0.816174 -0.0906863 -0.570645 
0.551323 -0.817664 0.165735 
0.824022 -0.126714 -0.552206 
0.847847 -0.284226 -0.447629 
0.259936 -0.864823 0.429552 
0.830115 -0.469031 -0.301527 
0.307401 -0.867334 0.391453 
0.402976 -0.860503 0.311679 
0.653093 -0.756186 0.0406553 
0.339377 -0.865541 0.368324 
0.81484 -0.0856456 -0.573325 
0.177957 -0.857734 0.482312 
0.6208 -0.779457 0.0839894 
0.582463 -0.802305 0.130552 
0.833217 -0.179414 -0.523029 
0.777493 -0.607014 -0.164435 
0.8462 -0.32603 -0.421485 
0.823482 -0.115732 -0.555412 
0.417519 -0.857054 0.301887 
0.816535 -0.51179 -0.267096 
0.84315 -0.239339 -0.481472 
0.235803 -0.864506 0.443876 
0.206276 -0.860613 0.465614 
0.499242 -0.839048 0.21623 
0.755013 -0.645536 -0.115059 
0.841958 -0.3935 -0.369141 
0.789471 -0.585452 -0.184339 
0.80319 -0.554101 -0.218763 
0.67081 -0.741432 0.0170986 
0.837408 -0.427054 -0.341134 
0.278124 -0.86641 0.414706 
0.698029 -0.715849 -0.01777 
0.191457 -0.858482 0.475766 
0.731884 -0.677365 -0.0743121 
0.516602 -0.832703 0.199316 
0.831943 -0.456265 -0.315743 
0.355326 -0.866471 0.350674 
0.828885 -0.154894 -0.537548 
0.457962 -0.850197 0.259683 
0.821144 -0.101885 -0.561553 
0.84091 -0.221738 -0.493663 
0.305241 -0.865405 0.397369 
0.70665 -0.706946 -0.029542 
0.549419 -0.818469 0.168067 
0.844377 -0.373231 -0.384353 
0.182603 -0.857542 0.480913 
0.845707 -0.349128 -0.403595 
0.845819 -0.283751 -0.451747 
0.805656 -0.548354 -0.224114 
0.627266 -0.775575 0.0708594 
0.593921 -0.796193 0.115474 
0.76303 -0.633664 -0.127492 
0.474909 -0.845661 0.243556 
0.210926 -0.861333 0.462185 
0.826086 -0.483039 -0.290269 
0.431685 -0.854086 0.290146 
0.816029 -0.0919101 -0.570656 
0.846977 -0.31136 -0.430913 
0.826044 -0.142861 -0.545199 
0.820343 -0.503495 -0.271165 
0.81275 -0.0809283 -0.576964 
0.676298 -0.736519 0.0126878 
0.738635 -0.669214 -0.0810627 
0.526067 -0.828551 0.191721 
0.789423 -0.585384 -0.184765 
0.388099 -0.862314 0.325259 
0.234427 -0.863548 0.446463 
0.32315 -0.866827 0.379716 
0.642684 -0.764144 0.0551523 
0.838789 -0.424385 -0.341072 
0.838529 -0.198092 -0.507571 
0.844038 -0.249228 -0.474853 
0.771594 -0.619182 -0.145796 
0.197297 -0.858365 0.473586 
0.270596 -0.864083 0.424428 
0.566796 -0.810711 0.146597 
0.602426 -0.791434 0.103515 
0.81152 -0.531867 -0.241977 
0.824244 -0.127246 -0.551752 
0.483462 -0.843888 0.232634 
0.169043 -0.854741 0.490757 
0.715552 -0.697168 -0.0440732 
0.353119 -0.865575 0.355087 
0.820715 -0.10611 -0.561398 
0.829652 -0.460509 -0.31561 
0.188579 -0.85706 0.479463 
0.253071 -0.864512 0.434252 
0.845261 -0.353505 -0.40071 
0.845034 -0.288772 -0.450033 
0.745645 -0.659859 -0.0927398 
0.816575 -0.0939543 -0.569541 
0.685897 -0.727688 -0.00392932 
0.833701 -0.172095 -0.524716 
0.842238 -0.230623 -0.487287 
0.722217 -0.689772 -0.0511651 
0.839609 -0.407398 -0.359282 
0.651599 -0.75737 0.0425488 
0.393878 -0.860586 0.322882 
0.843177 -0.384673 -0.375605 
0.426855 -0.858084 0.285458 
0.757129 -0.643415 -0.113018 
0.848366 -0.30435 -0.433182 
0.794287 -0.574196 -0.198511 
0.499848 -0.83792 0.219186 
0.292639 -0.866746 0.403873 
0.216356 -0.860056 0.462054 
0.534419 -0.825868 0.179832 
0.824886 -0.490055 -0.281797 
0.576665 -0.805939 0.133866 
0.453389 -0.851215 0.264333 
0.817236 -0.512782 -0.263022 
0.618028 -0.781532 0.0851422 
0.819792 -0.100685 -0.563741 
0.66785 -0.743979 0.0217222 
0.831914 -0.146195 -0.5353 
0.77698 -0.609368 -0.158031 
0.318313 -0.867054 0.383267 
0.839095 -0.210509 -0.501603 
0.197039 -0.859079 0.472397 
0.810841 -0.53492 -0.237482 
0.833971 -0.452995 -0.315101 
0.364183 -0.863607 0.348645 
0.844857 -0.27007 -0.461821 
0.220936 -0.861719 0.456758 
0.512277 -0.83401 0.204939 
0.846992 -0.338253 -0.410109 
0.799162 -0.562904 -0.210901 
0.726782 -0.684092 -0.0616886 
0.252389 -0.862525 0.438577 
0.189552 -0.856747 0.47964 
0.827465 -0.139838 -0.543826 
0.760979 -0.636772 -0.124227 
0.623593 -0.777878 0.0776979 
0.548898 -0.819159 0.1664 
0.586351 -0.800504 0.124035 
0.695285 -0.718513 -0.0177891 
0.841916 -0.385828 -0.377246 
0.739696 -0.667599 -0.0846175 
0.404509 -0.860797 0.308871 
0.459317 -0.850117 0.257545 
0.704331 -0.709409 -0.025627 
0.293948 -0.867284 0.401762 
0.840462 -0.411304 -0.352779 
0.332824 -0.868213 0.368014 
0.643387 -0.76345 0.0565418 
0.779212 -0.604724 -0.164737 
0.821535 -0.111487 -0.559152 
0.836983 -0.187895 -0.513959 
0.84634 -0.309283 -0.433651 
0.843971 -0.247229 -0.476016 
0.835441 -0.436873 -0.333437 
0.814742 -0.0837163 -0.573749 
0.824798 -0.487979 -0.28563 
0.42238 -0.857393 0.294061 
0.260742 -0.864416 0.429882 
0.203886 -0.858653 0.470261 
0.667343 -0.744411 0.0224823 
0.52696 -0.827928 0.191956 
0.484963 -0.842713 0.233764 
0.369308 -0.865616 0.338115 
0.816835 -0.51725 -0.255407 
0.72433 -0.686782 -0.0606303 
0.818116 -0.101292 -0.566062 
0.833499 -0.15528 -0.530253 
0.556697 -0.815339 0.15909 
0.187681 -0.856092 0.481541 
0.841441 -0.228257 -0.489772 
0.593775 -0.796549 0.113762 
0.845908 -0.286264 -0.449991 
0.211522 -0.858634 0.466911 
0.806849 -0.54182 -0.235428 
0.799931 -0.56293 -0.207895 
0.765355 -0.628585 -0.138246 
0.842203 -0.376713 -0.385722 
0.846473 -0.348506 -0.402526 
0.741197 -0.665136 -0.0906655 
0.3036 -0.866913 0.395333 
0.786363 -0.590559 -0.18131 
0.829974 -0.467 -0.305048 
0.499812 -0.838201 0.218187 
0.619696 -0.780248 0.0847918 
0.426503 -0.857295 0.288341 
0.818877 -0.108783 -0.563566 
0.8285 -0.143857 -0.541195 
0.707459 -0.705806 -0.036594 
0.232696 -0.861138 0.451989 
0.649464 -0.758849 0.0484132 
0.343552 -0.866135 0.363017 
0.840534 -0.403651 -0.361343 
0.817013 -0.0967202 -0.568449 
0.680604 -0.73264 0.00398727 
0.567701 -0.810248 0.145652 
0.379064 -0.86455 0.329945 
0.529555 -0.826813 0.189612 
0.268677 -0.866647 0.4204 
0.846917 -0.32069 -0.424134 
0.839535 -0.205004 -0.503145 
0.835941 -0.442629 -0.324472 
0.453322 -0.850399 0.267059 
0.728218 -0.682488 -0.0625161 
0.844245 -0.262095 -0.467501 
0.204552 -0.857537 0.472004 
0.751845 -0.650078 -0.110127 
0.770254 -0.621172 -0.144409 
0.816546 -0.518556 -0.253678 
0.668438 -0.743037 0.03296 
0.397073 -0.861871 0.315453 
0.59239 -0.79698 0.117885 
0.187892 -0.856868 0.480077 
0.471495 -0.845953 0.24911 
0.845425 -0.347204 -0.40584 
0.50144 -0.837033 0.218935 
0.35174 -0.865584 0.356432 
0.816166 -0.0870554 -0.571222 
0.708548 -0.70451 -0.0403039 
0.1827 -0.856304 0.483077 
0.843915 -0.238244 -0.480674 
0.238103 -0.861515 0.448441 
0.817862 -0.10467 -0.565814 
0.623536 -0.777452 0.0822879 
0.836156 -0.173707 -0.520259 
0.8059 -0.543386 -0.235067 
0.782627 -0.597165 -0.175751 
0.795007 -0.570909 -0.205005 
0.842728 -0.381606 -0.379718 
0.827047 -0.134367 -0.545838 
0.311689 -0.867133 0.388496 
0.686766 -0.726878 0.000669022 
0.846582 -0.308449 -0.433771 
0.205325 -0.859477 0.468124 
0.569037 -0.810141 0.140957 
0.539292 -0.823637 0.175459 
0.828713 -0.474429 -0.296904 
0.822974 -0.495024 -0.278683 
0.273075 -0.865914 0.419073 
0.835582 -0.441862 -0.326436 
0.421179 -0.857313 0.296013 
0.730913 -0.678532 -0.0732152 
0.840635 -0.407659 -0.356577 
0.755254 -0.645723 -0.112402 
0.640605 -0.765156 0.0645121 
0.774313 -0.613634 -0.154572 
0.840731 -0.210748 -0.498754 
0.82241 -0.118199 -0.55648 
0.600206 -0.792063 0.111307 
0.362399 -0.866315 0.343753 
0.439798 -0.854254 0.277178 
0.312309 -0.869721 0.382164 
0.476635 -0.843956 0.246086 
0.847032 -0.279704 -0.451999 
0.663969 -0.747206 0.0287791 
0.712693 -0.700052 -0.044683 
0.198015 -0.857483 0.474882 
0.845676 -0.347599 -0.404977 
0.509462 -0.834488 0.20995 
0.244133 -0.863199 0.441913 
0.820916 -0.105269 -0.561262 
0.207514 -0.861825 0.462813 
0.544478 -0.821817 0.167809 
0.834466 -0.170066 -0.52416 
0.688837 -0.724905 -0.0041407 
0.805982 -0.543863 -0.233681 
0.738711 -0.668353 -0.0872415 
0.387742 -0.862048 0.326387 
0.841887 -0.376594 -0.386528 
0.186519 -0.857409 0.479645 
0.827273 -0.474215 -0.301229 
0.81857 -0.0959097 -0.566343 
0.568414 -0.809633 0.146286 
0.327842 -0.867976 0.373011 
0.782885 -0.597249 -0.17431 
0.84634 -0.254541 -0.467886 
0.833579 -0.445524 -0.32658 
0.821588 -0.113648 -0.558639 
0.845519 -0.320125 -0.427338 
0.759748 -0.638274 -0.124054 
0.618997 -0.77988 0.0928933 
0.796644 -0.567249 -0.208774 
0.840226 -0.407035 -0.35825 
0.277204 -0.867184 0.413702 
0.642765 -0.76394 0.0570008 
0.830277 -0.144059 -0.538411 
0.818318 -0.506482 -0.27172 
0.20029 -0.859367 0.470502 
0.446936 -0.851196 0.275163 
0.478477 -0.844764 0.239654 
0.671512 -0.740758 0.0186816 
0.507701 -0.836048 0.208001 
0.84078 -0.225745 -0.492066 
0.811953 -0.529054 -0.246646 
0.411807 -0.858356 0.306007 
0.772239 -0.617797 -0.148234 
0.694 -0.719795 -0.0160927 
0.217198 -0.862641 0.45681 
0.715196 -0.697448 -0.0453913 
0.593765 -0.796027 0.117402 
0.84605 -0.350054 -0.402073 
0.845886 -0.290463 -0.447334 
0.243847 -0.864659 0.439208 
0.543612 -0.820946 0.174741 
0.33979 -0.868587 0.360693 
0.738337 -0.669101 -0.0846314 
0.193581 -0.858732 0.474453 
0.842371 -0.37963 -0.382482 
0.293414 -0.867606 0.401458 
0.823553 -0.114084 -0.555649 
0.843827 -0.249135 -0.475277 
0.835488 -0.183293 -0.518037 
0.829095 -0.13813 -0.541776 
0.720702 -0.691199 -0.0532266 
0.570544 -0.808791 0.142608 
0.834125 -0.442293 -0.329564 
0.530528 -0.827039 0.185868 
0.651735 -0.75705 0.0460047 
0.370547 -0.863063 0.343246 
0.830559 -0.468609 -0.300961 
0.62614 -0.775267 0.0831238 
0.817897 -0.0952877 -0.567419 
0.782076 -0.597931 -0.175599 
0.796732 -0.567287 -0.208337 
0.183162 -0.857338 0.481065 
0.488376 -0.840778 0.233627 
0.822277 -0.497979 -0.275459 
0.198763 -0.861204 0.467783 
0.67619 -0.73662 0.0126108 
0.451426 -0.851451 0.266919 
0.7586 -0.640239 -0.120916 
0.257557 -0.867287 0.426002 
0.838845 -0.412098 -0.355689 
0.411739 -0.859689 0.302332 
0.826716 -0.128178 -0.547823 
0.84469 -0.338491 -0.414635 
0.194139 -0.859595 0.472659 
0.30739 -0.867694 0.390663 
0.841739 -0.215462 -0.495026 
0.845489 -0.284281 -0.452032 
0.772515 -0.618567 -0.14351 
0.693503 -0.720318 -0.0139516 
0.745677 -0.659072 -0.0979285 
0.599617 -0.79193 0.115351 
0.810202 -0.532893 -0.244127 
0.822839 -0.107787 -0.557959 
0.547544 -0.819483 0.169246 
0.214466 -0.862576 0.458221 
0.338707 -0.868251 0.362515 
0.804367 -0.548637 -0.228018 
0.501933 -0.837326 0.216675 
0.844462 -0.324019 -0.426493 
0.724371 -0.686978 -0.0578522 
0.379001 -0.86305 0.333922 
0.459677 -0.84936 0.259393 
0.832319 -0.175329 -0.525836 
0.240103 -0.8642 0.442165 
0.844697 -0.373127 -0.383748 
0.83573 -0.438471 -0.330603 
0.827818 -0.471099 -0.304604 
0.78382 -0.595368 -0.176533 
0.845268 -0.255881 -0.469092 
0.624826 -0.776449 0.0819765 
0.700359 -0.713395 -0.0237606 
0.654114 -0.755005 0.0458505 
0.57647 -0.804767 0.141537 
0.514895 -0.831993 0.206568 
0.188606 -0.858227 0.477362 
0.675835 -0.736927 0.0136398 
0.828748 -0.146973 -0.539978 
0.840717 -0.206681 -0.500478 
0.273917 -0.867043 0.41618 
0.84018 -0.399719 -0.3665 
0.202842 -0.86237 0.463867 
0.418548 -0.86002 0.291863 
0.819955 -0.503936 -0.271517 
0.314278 -0.868189 0.384028 
0.754778 -0.646027 -0.113845 
0.602706 -0.789884 0.113267 
0.77331 -0.61611 -0.149666 
0.471692 -0.846691 0.246214 
0.195758 -0.861894 0.46778 
0.827044 -0.119704 -0.549244 
0.789789 -0.582435 -0.192362 
0.819762 -0.0853743 -0.566306 
0.729392 -0.68083 -0.0667637 
0.847644 -0.294083 -0.441605 
0.845203 -0.24365 -0.475675 
0.24271 -0.866003 0.437184 
0.822023 -0.102628 -0.56013 
0.844201 -0.357075 -0.399778 
0.810979 -0.531612 -0.244339 
0.738037 -0.669577 -0.0834763 
0.347293 -0.866504 0.358549 
0.216908 -0.865049 0.452372 
0.62772 -0.774429 0.0789115 
0.545308 -0.81985 0.174601 
0.38732 -0.864555 0.320198 
0.834421 -0.431372 -0.343015 
0.830739 -0.462737 -0.309429 
0.704389 -0.709226 -0.028883 
0.53059 -0.826099 0.189829 
0.496031 -0.837782 0.228199 
0.802682 -0.552491 -0.224624 
0.847787 -0.32967 -0.415421 
0.652889 -0.756153 0.0443788 
0.424622 -0.857536 0.290393 
0.577052 -0.804737 0.139321 
0.83057 -0.145286 -0.537629 
0.680748 -0.732506 0.00413603 
0.837912 -0.192772 -0.51063 
0.822155 -0.101684 -0.560108 
0.823002 -0.49252 -0.283005 
0.272495 -0.867993 0.415133 
0.841614 -0.39762 -0.365493 
0.772551 -0.617639 -0.147264 
0.847545 -0.279723 -0.451024 
0.187428 -0.858824 0.476751 
0.755887 -0.644003 -0.117878 
0.318124 -0.866763 0.384081 
0.842732 -0.220592 -0.491063 
0.608097 -0.78696 0.104464 
0.204113 -0.863415 0.461359 
0.252333 -0.865639 0.432432 
0.221389 -0.863813 0.452564 
0.827165 -0.119481 -0.549111 
0.710271 -0.702938 -0.0373287 
0.555236 -0.815053 0.165537 
0.354731 -0.86713 0.349645 
0.813293 -0.523495 -0.253984 
0.659483 -0.750727 0.0386305 
0.440112 -0.856106 0.270895 
0.468914 -0.84462 0.258333 
0.396796 -0.862764 0.313354 
0.194014 -0.86163 0.46899 
0.78836 -0.584819 -0.190986 
0.835804 -0.427838 -0.344074 
0.84586 -0.363289 -0.390566 
0.837243 -0.182851 -0.515354 
0.829895 -0.461089 -0.31412 
0.632546 -0.771255 0.0710672 
0.505339 -0.83491 0.218077 
0.739506 -0.668022 -0.0829301 
0.825037 -0.111402 -0.553988 
0.683106 -0.730299 0.00549844 
0.846193 -0.320713 -0.425558 
0.584119 -0.800129 0.136374 
0.724092 -0.686906 -0.0620496 
0.844885 -0.268721 -0.462557 
0.830308 -0.139506 -0.539562 
0.778893 -0.604868 -0.165713 
0.820293 -0.0904218 -0.56475 
0.803226 -0.552851 -0.221773 
0.822316 -0.492002 -0.285884 
0.841425 -0.387696 -0.376425 
0.51925 -0.830779 0.200465 
0.230708 -0.864114 0.447303 
0.320659 -0.868358 0.378328 
0.272035 -0.86654 0.418456 
0.207862 -0.863184 0.460117 
0.841045 -0.211994 -0.497697 
0.60566 -0.788888 0.104073 
0.359552 -0.8657 0.348262 
0.795003 -0.572157 -0.201511 
0.756651 -0.642418 -0.121569 
0.407281 -0.86091 0.304888 
0.662691 -0.748155 0.033234 
0.554556 -0.815607 0.165083 
0.479448 -0.842141 0.246835 
0.637355 -0.767712 0.0663013 
0.249019 -0.864477 0.436656 
0.813942 -0.51928 -0.260474 
0.838127 -0.422162 -0.345431 
0.822694 -0.0952497 -0.560448 
0.845503 -0.244632 -0.474637 
0.690922 -0.722879 -0.00852312 
0.845802 -0.314724 -0.430775 
0.836936 -0.171448 -0.519753 
0.745078 -0.660295 -0.0941769 
0.831245 -0.456684 -0.316973 
0.703766 -0.709918 -0.0269977 
0.28852 -0.867067 0.406142 
0.827417 -0.118642 -0.548912 
0.43546 -0.854036 0.2846 
0.844282 -0.35954 -0.39739 
0.194276 -0.861691 0.468771 
0.5784 -0.803863 0.138774 
0.804707 -0.546676 -0.2315 
0.535836 -0.823084 0.188181 
0.721817 -0.689314 -0.0618513 
0.370617 -0.865131 0.337921 
0.825247 -0.48816 -0.28402 
0.328799 -0.867878 0.372396 
0.761991 -0.633262 -0.135458 
0.216381 -0.864885 0.452939 
0.612468 -0.784127 0.100139 
0.487706 -0.841049 0.234049 
0.842135 -0.215923 -0.494151 
0.843446 -0.386984 -0.372615 
0.780146 -0.603806 -0.163682 
0.845374 -0.301586 -0.440895 
0.834696 -0.154555 -0.528579 
0.663846 -0.747266 0.0300531 
0.823299 -0.112372 -0.556373 
0.641536 -0.764759 0.059788 
0.236588 -0.864461 0.443545 
0.405401 -0.86009 0.309668 
0.831792 -0.457193 -0.314795 
0.790248 -0.580985 -0.194844 
0.555439 -0.815718 0.161527 
0.448394 -0.850803 0.274002 
0.844075 -0.250194 -0.474278 
0.839579 -0.419383 -0.345291 
0.25443 -0.865261 0.431959 
0.812808 -0.525668 -0.251031 
0.84559 -0.349807 -0.403253 
0.507997 -0.834084 0.215041 
0.296674 -0.869441 0.39504 
0.820608 -0.0964551 -0.563293 
0.204926 -0.863378 0.461068 
0.581027 -0.802713 0.134389 
0.701459 -0.712019 -0.0313691 
0.739242 -0.66705 -0.0925525 
0.686799 -0.726847 0.000931375 
0.843959 -0.284566 -0.454705 
0.338197 -0.867614 0.364513 
0.461216 -0.847106 0.263991 
0.726418 -0.684177 -0.0649551 
0.845289 -0.335095 -0.416169 
0.540474 -0.82167 0.180958 
0.825975 -0.488062 -0.282066 
0.82992 -0.132634 -0.541887 
0.839785 -0.191802 -0.50791 
0.372414 -0.863766 0.339436 
0.616581 -0.781836 0.0925261 
0.269242 -0.867539 0.418193 
0.804857 -0.547079 -0.230023 
0.780338 -0.60233 -0.168141 
0.667297 -0.7443 0.0270526 
0.844351 -0.381058 -0.376651 
0.640513 -0.765414 0.0623233 
0.219992 -0.863615 0.453621 
0.233023 -0.86466 0.445042 
0.791644 -0.575865 -0.204155 
0.761516 -0.634685 -0.13141 
0.846869 -0.242154 -0.47347 
0.307543 -0.867238 0.391555 
0.815017 -0.516934 -0.261776 
0.558925 -0.813369 0.161348 
0.749406 -0.652733 -0.111041 
0.825904 -0.121736 -0.550511 
0.833817 -0.449624 -0.320292 
0.510626 -0.833662 0.210402 
0.406383 -0.860106 0.308334 
0.845964 -0.315265 -0.430061 
0.837804 -0.165044 -0.520427 
0.840848 -0.410483 -0.352813 
0.466841 -0.846478 0.255996 
0.583862 -0.801435 0.129639 
0.711404 -0.701445 -0.0433452 
0.819752 -0.0938382 -0.564979 
0.847408 -0.277485 -0.45266 
0.822656 -0.10308 -0.559117 
0.843314 -0.22236 -0.489262 
0.623413 -0.777277 0.0848313 
0.686012 -0.727581 -0.00374686 
0.23845 -0.865216 0.44107 
0.208645 -0.863818 0.458569 
0.804189 -0.548004 -0.230156 
0.826044 -0.483729 -0.289235 
0.339546 -0.865733 0.367715 
0.427376 -0.854689 0.294715 
0.844011 -0.370339 -0.387937 
0.378165 -0.86266 0.33587 
0.275151 -0.868467 0.41238 
0.536256 -0.82377 0.183937 
0.22317 -0.862457 0.454272 
0.780656 -0.601275 -0.170425 
0.725024 -0.685117 -0.0703905 
0.483436 -0.841765 0.240253 
0.648381 -0.759193 0.0568179 
0.833343 -0.147777 -0.532636 
0.835105 -0.443754 -0.325086 
0.763249 -0.631688 -0.135721 
0.559723 -0.813205 0.1594 
0.66724 -0.744412 0.0253257 
0.815736 -0.516532 -0.260326 
0.595787 -0.794907 0.114716 
0.791282 -0.579699 -0.194476 
0.840033 -0.202997 -0.503126 
0.307334 -0.866486 0.393379 
0.845556 -0.344661 -0.40773 
0.824885 -0.10978 -0.554539 
0.841913 -0.401341 -0.360705 
0.84765 -0.274066 -0.454289 
0.745951 -0.65821 -0.101568 
0.84754 -0.315501 -0.426773 
0.437038 -0.853478 0.283854 
0.514082 -0.83297 0.204645 
0.693184 -0.720592 -0.0155893 
0.708089 -0.705042 -0.0390623 
0.622961 -0.777625 0.084965 
0.820268 -0.100668 -0.563051 
0.216284 -0.86247 0.457565 
0.24581 -0.866022 0.435411 
0.225435 -0.862799 0.452502 
0.391236 -0.860744 0.325661 
0.730596 -0.67819 -0.0793001 
0.808969 -0.537654 -0.237692 
0.82885 -0.476207 -0.293657 
0.540726 -0.82192 0.179061 
0.837361 -0.42776 -0.340365 
0.344489 -0.865013 0.364802 
0.828928 -0.136846 -0.542358 
0.272515 -0.867092 0.416998 
0.816169 -0.0875064 -0.571148 
0.569108 -0.809003 0.14707 
0.457395 -0.84781 0.268344 
0.818539 -0.0913805 -0.567136 
0.846859 -0.256394 -0.46593 
0.839313 -0.191098 -0.508955 
0.64277 -0.763825 0.0584642 
0.4883 -0.840455 0.234945 
0.762528 -0.631099 -0.142355 
0.819182 -0.106423 -0.563573 
0.79189 -0.577412 -0.198759 
0.668834 -0.742995 0.0248937 
0.819999 -0.504321 -0.270669 
0.840528 -0.39001 -0.376039 
0.594757 -0.795522 0.115796 
0.362332 -0.863621 0.350533 
0.774 -0.612897 -0.159 
0.407517 -0.857332 0.314502 
0.220195 -0.862987 0.454717 
0.816194 -0.0883608 -0.570981 
0.845722 -0.348267 -0.404308 
0.305207 -0.866533 0.394928 
0.845701 -0.232203 -0.480492 
0.748219 -0.654256 -0.110086 
0.716663 -0.695519 -0.0514509 
0.510553 -0.833245 0.212225 
0.848504 -0.318862 -0.422337 
0.227865 -0.863814 0.449335 
0.826487 -0.12188 -0.549603 
0.687929 -0.725758 -0.00535889 
0.807775 -0.540584 -0.235092 
0.831462 -0.465055 -0.303964 
0.838333 -0.176041 -0.515952 
0.847859 -0.293732 -0.441426 
0.620235 -0.779623 0.0865762 
0.206934 -0.861401 0.463861 
0.573871 -0.806401 0.142794 
0.246571 -0.865742 0.435539 
0.839241 -0.418649 -0.346998 
0.543829 -0.820353 0.176836 
0.421601 -0.856323 0.298267 
0.779279 -0.602302 -0.17308 
0.725813 -0.684829 -0.0648406 
0.820913 -0.0988435 -0.562434 
0.844035 -0.224662 -0.486963 
0.798811 -0.564543 -0.207828 
0.605422 -0.789367 0.101805 
0.456963 -0.848669 0.266357 
0.674219 -0.738394 0.0142414 
0.646608 -0.761048 0.0520019 
0.820093 -0.504926 -0.269254 
0.370078 -0.864222 0.340827 
0.261832 -0.866303 0.425398 
0.327732 -0.865875 0.377958 
0.223988 -0.864198 0.450545 
0.833521 -0.150237 -0.531668 
0.698814 -0.714983 -0.0213987 
0.844693 -0.38008 -0.376874 
0.520242 -0.829277 0.204077 
0.482989 -0.840775 0.244579 
0.834966 -0.447232 -0.320648 
0.84674 -0.275513 -0.455108 
0.825435 -0.118961 -0.55182 
0.847702 -0.350365 -0.398304 
0.756327 -0.641709 -0.127197 
0.548492 -0.818405 0.171376 
0.811122 -0.530114 -0.247103 
0.744691 -0.659469 -0.102644 
0.21172 -0.861842 0.460873 
0.841188 -0.20651 -0.499756 
0.573542 -0.806562 0.143204 
0.780945 -0.59929 -0.176003 
0.228738 -0.864674 0.447233 
0.622783 -0.777969 0.0830946 
0.848073 -0.325136 -0.418401 
0.296424 -0.865786 0.403173 
0.340761 -0.865477 0.367194 
0.845283 -0.256937 -0.468487 
0.707178 -0.706165 -0.0350822 
0.391911 -0.860278 0.32608 
0.731611 -0.676989 -0.0801931 
0.84051 -0.408364 -0.356065 
0.493217 -0.838472 0.231736 
0.651852 -0.757035 0.0445803 
0.796768 -0.567605 -0.207328 
0.764067 -0.630185 -0.13809 
0.823906 -0.111152 -0.555719 
0.238138 -0.864441 0.442756 
0.422909 -0.855551 0.298631 
0.821465 -0.497696 -0.278377 
0.831193 -0.142999 -0.537279 
0.837342 -0.184069 -0.514759 
0.447323 -0.848675 0.282229 
0.820402 -0.103226 -0.562392 
0.66567 -0.745832 0.0248635 
0.602355 -0.790692 0.109429 
0.519636 -0.830011 0.202632 
0.265253 -0.865456 0.425001 
0.848658 -0.312376 -0.42685 
0.844344 -0.388645 -0.368834 
0.220007 -0.863852 0.453163 
0.835864 -0.442621 -0.324682 
0.8258 -0.483005 -0.291137 
0.846797 -0.244783 -0.472247 
0.714885 -0.697225 -0.0530743 
0.353584 -0.864452 0.357352 
0.582213 -0.802298 0.131707 
0.303576 -0.866576 0.396089 
0.811697 -0.530681 -0.24398 
0.623952 -0.77708 0.0826468 
0.548736 -0.81819 0.171621 
0.687539 -0.726124 -0.00582699 
0.847149 -0.294283 -0.442422 
0.782494 -0.596371 -0.179011 
0.771225 -0.6192 -0.147657 
0.799245 -0.559094 -0.220502 
0.817906 -0.095152 -0.56743 
0.460912 -0.847244 0.264079 
0.846073 -0.374926 -0.378935 
0.743009 -0.661948 -0.0988106 
0.826518 -0.126193 -0.548584 
0.843934 -0.223968 -0.487456 
0.730276 -0.6787 -0.0778602 
0.530601 -0.825327 0.193125 
0.381972 -0.862847 0.331049 
0.841038 -0.420789 -0.339987 
0.838078 -0.17881 -0.515414 
0.22715 -0.863832 0.449663 
0.492435 -0.839393 0.230059 
0.24137 -0.864493 0.4409 
0.278661 -0.86587 0.415473 
0.419178 -0.85678 0.300364 
0.848885 -0.342671 -0.402456 
0.6473 -0.760339 0.0537343 
0.320887 -0.864929 0.385914 
0.603047 -0.790745 0.105149 
0.6963 -0.717439 -0.0211614 
0.822134 -0.10889 -0.558783 
0.846823 -0.278808 -0.452942 
0.665136 -0.746326 0.0243199 
0.556586 -0.814373 0.164343 
0.819725 -0.506614 -0.267196 
0.836262 -0.451413 -0.311274 
0.788181 -0.585519 -0.189571 
0.75023 -0.651422 -0.113157 
0.216124 -0.862707 0.457195 
0.826108 -0.478628 -0.297422 
0.820427 -0.104847 -0.562055 
0.842841 -0.209211 -0.495832 
0.836101 -0.168677 -0.522 
0.849108 -0.324421 -0.416852 
0.713787 -0.698852 -0.0459722 
0.577494 -0.804626 0.138125 
0.506611 -0.834422 0.216992 
0.351588 -0.863976 0.360459 
0.255418 -0.86445 0.432999 
0.426736 -0.855842 0.292286 
0.841537 -0.413163 -0.34801 
0.617089 -0.781949 0.0880675 
0.76633 -0.627412 -0.138172 
0.465197 -0.847408 0.255911 
0.797706 -0.563405 -0.215034 
0.846506 -0.262615 -0.463099 
0.815255 -0.0905791 -0.571975 
0.287623 -0.864945 0.41127 
0.533907 -0.82368 0.191035 
0.217243 -0.86321 0.455713 
0.808595 -0.53785 -0.23852 
0.81701 -0.0955247 -0.568656 
0.234555 -0.864208 0.445117 
0.848311 -0.314195 -0.426205 
0.674795 -0.737888 0.0131462 
0.846737 -0.381304 -0.371005 
0.384521 -0.860637 0.333837 
0.832757 -0.149607 -0.533042 
0.734616 -0.673344 -0.0833521 
0.317756 -0.866729 0.384463 
0.721169 -0.689847 -0.0634502 
0.836046 -0.445756 -0.31989 
0.841344 -0.205253 -0.500012 
0.753648 -0.646095 -0.120733 
0.644423 -0.762597 0.0562613 
0.599103 -0.792637 0.113148 
0.69724 -0.716513 -0.0215979 
0.56139 -0.812414 0.15756 
0.77552 -0.611835 -0.155652 
0.254481 -0.864859 0.432734 
0.475122 -0.843777 0.249599 
0.81558 -0.519249 -0.255363 
0.826442 -0.125235 -0.548918 
0.846826 -0.358955 -0.392475 
0.845786 -0.246844 -0.472985 
0.819264 -0.109835 -0.5628 
0.784656 -0.593053 -0.180563 
0.827674 -0.485155 -0.282102 
0.395226 -0.86174 0.31812 
0.433372 -0.853727 0.288685 
0.848511 -0.297667 -0.437519 
0.236492 -0.864642 0.443245 
0.214414 -0.863249 0.456978 
0.350265 -0.863509 0.362859 
0.621394 -0.778565 0.0877832 
0.584204 -0.800727 0.132444 
0.507375 -0.834372 0.215393 
0.533906 -0.824121 0.189126 
0.707438 -0.705761 -0.0378478 
0.817349 -0.101798 -0.567078 
0.838167 -0.185614 -0.512858 
0.839553 -0.433297 -0.327727 
0.653196 -0.755884 0.0444431 
0.22315 -0.864252 0.450858 
0.848227 -0.348276 -0.399017 
0.284043 -0.865519 0.412548 
0.824144 -0.121656 -0.553161 
0.737388 -0.669814 -0.0872225 
0.792338 -0.576656 -0.199169 
0.755446 -0.644836 -0.116132 
0.846465 -0.282713 -0.451189 
0.668719 -0.743298 0.0179703 
0.803736 -0.54942 -0.228355 
0.444912 -0.851061 0.278833 
0.828076 -0.479329 -0.290746 
0.315048 -0.864844 0.390883 
0.842699 -0.236051 -0.483879 
0.83458 -0.16091 -0.526863 
0.771215 -0.617968 -0.152781 
0.844059 -0.396946 -0.360553 
0.476633 -0.843743 0.246817 
0.3606 -0.864203 0.350885 
0.56099 -0.812717 0.15742 
0.405267 -0.859484 0.311523 
0.596229 -0.793766 0.120194 
0.250383 -0.864276 0.436275 
0.262251 -0.865404 0.426966 
0.847469 -0.331786 -0.414385 
0.720962 -0.690285 -0.0610037 
0.687999 -0.725682 -0.00654271 
0.817501 -0.516481 -0.254833 
0.232644 -0.863282 0.447907 
0.62011 -0.779728 0.0865327 
0.508005 -0.834338 0.214036 
0.821818 -0.120671 -0.556824 
0.757878 -0.639157 -0.130768 
0.832025 -0.15087 -0.533829 
0.840333 -0.425515 -0.335824 
0.578987 -0.803257 0.139831 
0.538766 -0.821812 0.185354 
0.846819 -0.268062 -0.459392 
0.847108 -0.374939 -0.3766 
0.742522 -0.663095 -0.094684 
0.816027 -0.098283 -0.569596 
0.373792 -0.862793 0.340394 
0.832254 -0.466976 -0.29881 
0.77784 -0.60595 -0.166704 
0.323695 -0.864788 0.383879 
0.790457 -0.580189 -0.196362 
0.839203 -0.222226 -0.496341 
0.408721 -0.858467 0.309808 
0.281763 -0.863444 0.418418 
0.645615 -0.762126 0.0484148 
0.448794 -0.850316 0.274856 
0.847992 -0.323113 -0.420128 
0.700256 -0.713503 -0.023553 
0.847148 -0.365313 -0.385858 
0.482946 -0.841138 0.243413 
0.819578 -0.509432 -0.262242 
0.598464 -0.792926 0.114494 
0.804096 -0.549962 -0.225766 
0.232502 -0.864149 0.446306 
0.822079 -0.114181 -0.557808 
0.827753 -0.134374 -0.544765 
0.629438 -0.773572 0.0734458 
0.72374 -0.686738 -0.0677608 
0.838192 -0.200648 -0.507123 
0.667324 -0.744476 0.0208369 
0.749516 -0.653346 -0.10661 
0.245649 -0.863767 0.439958 
0.509662 -0.832921 0.21561 
0.846078 -0.257339 -0.466828 
0.256042 -0.862966 0.435583 
0.548784 -0.818206 0.171388 
0.846731 -0.304038 -0.436585 
0.332352 -0.865373 0.375062 
0.227757 -0.862793 0.451348 
0.296026 -0.865633 0.403791 
0.833522 -0.45673 -0.310869 
0.840189 -0.412411 -0.352137 
0.683963 -0.729508 -0.0035712 
0.761123 -0.635615 -0.129172 
0.579454 -0.803312 0.137562 
0.822782 -0.49725 -0.275268 
0.778682 -0.605324 -0.165038 
0.531753 -0.825429 0.18949 
0.835918 -0.180387 -0.518365 
0.368595 -0.863923 0.343185 
0.709242 -0.703722 -0.0418587 
0.820106 -0.108588 -0.561814 
0.415207 -0.857544 0.303681 
0.824284 -0.128255 -0.551459 
0.847259 -0.353073 -0.396851 
0.449381 -0.85034 0.273823 
0.809004 -0.539834 -0.232577 
0.836676 -0.440289 -0.32576 
0.792526 -0.578066 -0.194276 
0.72443 -0.686329 -0.0644427 
0.599557 -0.792721 0.110116 
0.849358 -0.288761 -0.441823 
0.842286 -0.239982 -0.482662 
0.644634 -0.76262 0.0534548 
0.476596 -0.844542 0.244144 
0.268989 -0.864492 0.424617 
0.839709 -0.40403 -0.362834 
0.763041 -0.632233 -0.134353 
0.233419 -0.863569 0.44695 
0.343154 -0.865828 0.364125 
0.8228 -0.123485 -0.554754 
0.848826 -0.335442 -0.408624 
0.81869 -0.109446 -0.563709 
0.825255 -0.486921 -0.286116 
0.30888 -0.864683 0.396127 
0.617515 -0.781618 0.0880279 
0.248818 -0.863764 0.438179 
0.830124 -0.159885 -0.534163 
0.549185 -0.818993 0.166273 
0.57466 -0.806381 0.139697 
0.811475 -0.532362 -0.241035 
0.745033 -0.660048 -0.0962407 
0.682216 -0.731148 0.00190072 
0.656079 -0.753759 0.037522 
0.496038 -0.838674 0.224884 
0.378863 -0.861925 0.33697 
0.847243 -0.273537 -0.455365 
0.84069 -0.219927 -0.494846 
0.79862 -0.566225 -0.20395 
0.708165 -0.705033 -0.0378289 
0.422488 -0.855377 0.299723 
0.528956 -0.826114 0.194272 
0.251627 -0.863779 0.436544 
0.77803 -0.606396 -0.164172 
0.726987 -0.68302 -0.0705261 
0.821178 -0.116954 -0.55856 
0.82988 -0.468898 -0.30238 
0.847832 -0.321263 -0.421867 
0.841065 -0.391872 -0.372888 
0.44984 -0.850319 0.273134 
0.82916 -0.152628 -0.537772 
0.838163 -0.427229 -0.339054 
0.74934 -0.653641 -0.106032 
0.271887 -0.865119 0.421481 
0.225083 -0.863179 0.451952 
0.348082 -0.863457 0.365078 
0.817448 -0.515574 -0.256831 
0.692059 -0.721736 -0.0123292 
0.766662 -0.626777 -0.139212 
0.838314 -0.196308 -0.508618 
0.588525 -0.79938 0.120955 
0.305127 -0.863774 0.400988 
0.470777 -0.845423 0.252248 
0.843091 -0.249799 -0.476233 
0.545755 -0.820451 0.170326 
0.800111 -0.560005 -0.214981 
0.623635 -0.777627 0.0798486 
0.38616 -0.86246 0.327174 
0.820927 -0.113016 -0.559739 
0.844076 -0.375057 -0.383234 
0.235756 -0.862518 0.447751 
0.839954 -0.416982 -0.347279 
0.569357 -0.809196 0.145033 
0.782318 -0.59785 -0.174797 
0.661162 -0.749661 0.0295329 
0.848595 -0.311961 -0.427277 
0.819337 -0.111634 -0.562339 
0.836207 -0.182547 -0.517141 
0.257707 -0.864076 0.432389 
0.827307 -0.141083 -0.543745 
0.244832 -0.863653 0.440636 
0.711251 -0.701415 -0.0462374 
0.846371 -0.277641 -0.454501 
0.820333 -0.506423 -0.265689 
0.830584 -0.462413 -0.310329 
0.497977 -0.838054 0.2229 
0.630812 -0.772515 0.0727881 
0.42645 -0.854891 0.295469 
0.725851 -0.684418 -0.0686453 
0.526459 -0.827717 0.194231 
0.807732 -0.545871 -0.222697 
0.352839 -0.865986 0.354364 
0.74801 -0.655486 -0.104013 
0.315544 -0.865449 0.38914 
0.825697 -0.128965 -0.549174 
0.841676 -0.241401 -0.483019 
0.844587 -0.363589 -0.393034 
0.266781 -0.86404 0.426923 
0.441709 -0.852008 0.281027 
0.598827 -0.793148 0.111008 
0.685856 -0.727727 -0.00391244 
0.768784 -0.623789 -0.140916 
0.472049 -0.844679 0.252362 
0.78927 -0.585574 -0.184813 
0.668638 -0.743294 0.0208993 
0.547645 -0.818511 0.173564 
0.839044 -0.406204 -0.361944 
0.394942 -0.860454 0.321931 
0.833503 -0.167925 -0.526379 
0.825868 -0.492273 -0.274971 
0.839728 -0.212412 -0.499738 
0.732434 -0.676324 -0.078265 
0.833242 -0.453747 -0.315947 
0.286639 -0.863706 0.414549 
0.808414 -0.540496 -0.23309 
0.84779 -0.315419 -0.426338 
0.248103 -0.864428 0.437275 
0.237631 -0.86276 0.446292 
0.572783 -0.807458 0.14118 
0.845818 -0.278153 -0.455218 
0.754878 -0.646006 -0.113289 
0.604233 -0.789891 0.104763 
0.844783 -0.351819 -0.403194 
0.636062 -0.769251 0.0606484 
0.364917 -0.86244 0.35076 
0.835979 -0.438201 -0.330331 
0.825599 -0.129396 -0.54922 
0.491674 -0.841212 0.224985 
0.258992 -0.864196 0.431379 
0.829952 -0.149248 -0.537498 
0.519475 -0.831339 0.197537 
0.705592 -0.707892 -0.0320734 
0.325378 -0.866948 0.377531 
0.776621 -0.610713 -0.154566 
0.840313 -0.399635 -0.366286 
0.694432 -0.719209 -0.0224095 
0.82292 -0.121709 -0.554968 
0.792975 -0.577019 -0.195548 
0.443418 -0.851648 0.279422 
0.838174 -0.198855 -0.50786 
0.406794 -0.859893 0.308385 
0.827539 -0.480944 -0.289609 
0.81347 -0.527573 -0.244812 
0.84332 -0.250968 -0.475211 
0.538831 -0.823595 0.177066 
0.466424 -0.848867 0.248743 
0.66594 -0.745433 0.0292167 
0.265188 -0.864889 0.426196 
0.823321 -0.104306 -0.55791 
0.296254 -0.864858 0.405283 
0.643521 -0.763968 0.0472524 
0.716618 -0.695488 -0.0524885 
0.738318 -0.66961 -0.0806777 
0.847593 -0.306993 -0.432829 
0.61727 -0.781507 0.0906839 
0.79889 -0.566159 -0.203073 
0.836863 -0.177086 -0.517977 
0.574624 -0.806686 0.138078 
0.841797 -0.385094 -0.37826 
0.783868 -0.598174 -0.166549 
0.384215 -0.860757 0.33388 
0.236307 -0.862768 0.44698 
0.847102 -0.350822 -0.399176 
0.755726 -0.644618 -0.115523 
0.826997 -0.143305 -0.543636 
0.24543 -0.863222 0.441148 
0.838493 -0.428352 -0.336815 
0.815727 -0.519577 -0.254222 
0.82876 -0.474008 -0.297446 
0.521353 -0.830549 0.195907 
0.846521 -0.288023 -0.447711 
0.825618 -0.131151 -0.548775 
0.328427 -0.866846 0.375117 
0.268157 -0.866388 0.421263 
0.581171 -0.802858 0.132891 
0.497224 -0.838705 0.222134 
0.673277 -0.739273 0.013199 
0.842093 -0.243152 -0.481412 
0.341008 -0.865687 0.36647 
0.551857 -0.817874 0.162899 
0.447608 -0.851342 0.273613 
0.823745 -0.119648 -0.554192 
0.416622 -0.857671 0.301375 
0.250824 -0.863681 0.437199 
0.800717 -0.561738 -0.208092 
0.687819 -0.725836 -0.00820925 
0.614891 -0.783588 0.0888708 
0.833072 -0.453408 -0.316877 
0.718183 -0.693775 -0.0537562 
0.841323 -0.212434 -0.497038 
0.763246 -0.633497 -0.127034 
0.820188 -0.0878977 -0.565302 
0.834123 -0.166337 -0.5259 
0.739899 -0.667296 -0.0852393 
0.839538 -0.418478 -0.346486 
0.819096 -0.50856 -0.265423 
0.462316 -0.85009 0.252211 
0.290757 -0.866664 0.405405 
0.639355 -0.766816 0.0567277 
0.843035 -0.385491 -0.375084 
0.783892 -0.596911 -0.170912 
0.845865 -0.345286 -0.40656 
0.380029 -0.861575 0.336552 
0.844496 -0.280033 -0.456518 
0.846263 -0.324453 -0.422574 
0.695642 -0.718028 -0.0227607 
0.23826 -0.863096 0.445306 
0.829067 -0.150872 -0.538411 
0.802289 -0.556463 -0.21606 
0.788972 -0.58838 -0.177009 
0.563297 -0.811764 0.154062 
0.591353 -0.798013 0.116094 
0.49334 -0.840427 0.224274 
0.527554 -0.828021 0.189919 
0.253779 -0.863974 0.434909 
0.823503 -0.104264 -0.557649 
0.768521 -0.625617 -0.134086 
0.246757 -0.863656 0.439555 
0.263198 -0.866127 0.424913 
0.821525 -0.500895 -0.272398 
0.837288 -0.206851 -0.506123 
0.747143 -0.657573 -0.0968234 
0.664615 -0.74682 0.0233875 
0.833474 -0.454896 -0.313673 
0.719998 -0.691674 -0.0564774 
0.827205 -0.138218 -0.544636 
0.413155 -0.857684 0.306075 
0.353761 -0.863247 0.36008 
0.310785 -0.865625 0.392562 
0.61572 -0.782843 0.0896907 
0.844795 -0.253362 -0.471307 
0.477714 -0.844976 0.240426 
0.653763 -0.755706 0.0387748 
0.436381 -0.855773 0.277892 
0.845196 -0.376333 -0.379497 
0.806931 -0.544507 -0.228854 
0.53864 -0.823921 0.176128 
0.845661 -0.315071 -0.430799 
0.838161 -0.41897 -0.349212 
0.836236 -0.176485 -0.519194 
0.825819 -0.483938 -0.289529 
0.70381 -0.709726 -0.0306741 
0.596911 -0.794626 0.110755 
0.679511 -0.73365 0.00467784 
0.818492 -0.0888081 -0.567613 
0.275172 -0.866934 0.415578 
0.566995 -0.811049 0.143935 
0.377844 -0.861452 0.339315 
0.732236 -0.677139 -0.0728969 
0.789783 -0.584689 -0.185424 
0.830254 -0.149828 -0.53687 
0.842286 -0.248884 -0.478133 
0.845579 -0.290605 -0.447823 
0.84472 -0.36493 -0.391503 
0.6352 -0.769264 0.0689393 
0.77547 -0.611997 -0.155262 
0.501971 -0.837025 0.217747 
0.241825 -0.864196 0.441233 
0.834623 -0.449509 -0.31835 
0.814466 -0.524817 -0.247413 
0.751223 -0.65217 -0.101675 
0.319829 -0.865288 0.385988 
0.250547 -0.865046 0.434651 
0.410587 -0.857667 0.309558 
0.349209 -0.865797 0.358397 
0.825008 -0.108008 -0.554704 
0.259746 -0.864111 0.431097 
0.68521 -0.728333 -0.00429514 
0.796724 -0.568391 -0.205335 
0.545665 -0.820729 0.169277 
0.443126 -0.855066 0.269262 
0.839046 -0.224431 -0.495613 
0.758347 -0.640437 -0.12145 
0.509817 -0.834999 0.207033 
0.470406 -0.845842 0.251533 
0.236605 -0.862288 0.447748 
0.645717 -0.761731 0.0530531 
0.827325 -0.141713 -0.543554 
0.826307 -0.483736 -0.288474 
0.840543 -0.413811 -0.34964 
0.844496 -0.352376 -0.403308 
0.57847 -0.804809 0.132875 
0.703932 -0.709578 -0.0312847 
0.844834 -0.28547 -0.452506 
0.817329 -0.515505 -0.257346 
0.816746 -0.0851814 -0.570676 
0.603817 -0.789998 0.106339 
0.834409 -0.185416 -0.519021 
0.846551 -0.323842 -0.422466 
0.732431 -0.676418 -0.0774891 
0.819975 -0.0913479 -0.565063 
0.277643 -0.867703 0.412317 
0.801344 -0.559098 -0.212736 
0.654599 -0.755058 0.0372469 
0.778129 -0.606472 -0.163421 
0.377829 -0.862857 0.335743 
0.842974 -0.398431 -0.361452 
0.836237 -0.441592 -0.32512 
0.71522 -0.69777 -0.0397056 
0.318204 -0.86582 0.386136 
0.842617 -0.259043 -0.472116 
0.241081 -0.863353 0.443285 
0.54728 -0.819758 0.168763 
0.406287 -0.860516 0.307317 
0.623586 -0.777083 0.0853342 
0.839571 -0.207061 -0.502242 
0.827583 -0.135671 -0.544701 
0.52013 -0.8306 0.198916 
0.688176 -0.725521 -0.00579324 
0.743437 -0.662269 -0.0932825 
0.816737 -0.0866965 -0.57046 
0.483856 -0.84251 0.236771 
0.250539 -0.864714 0.435315 
0.846677 -0.321013 -0.424368 
0.262656 -0.864787 0.427967 
0.763946 -0.631614 -0.132101 
0.58063 -0.803466 0.131576 
0.807167 -0.545501 -0.225632 
0.342847 -0.864718 0.36704 
0.829769 -0.472701 -0.296712 
0.440834 -0.854959 0.27333 
0.66416 -0.747104 0.0269735 
0.781522 -0.600527 -0.169086 
0.844157 -0.383933 -0.374158 
0.816192 -0.0850611 -0.571485 
0.818191 -0.51118 -0.263171 
0.817489 -0.0903253 -0.568818 
0.279343 -0.866301 0.414114 
0.82334 -0.11066 -0.556655 
0.846148 -0.357946 -0.394853 
0.83717 -0.438817 -0.326476 
0.844631 -0.294204 -0.447261 
0.450614 -0.852256 0.265718 
0.627603 -0.774972 0.0743817 
0.835074 -0.182388 -0.519024 
0.550948 -0.818174 0.16446 
0.69812 -0.71574 -0.0185494 
0.379603 -0.861855 0.336316 
0.597364 -0.793296 0.117632 
0.843087 -0.247025 -0.477686 
0.789037 -0.585492 -0.186066 
0.810447 -0.535874 -0.236675 
0.520163 -0.830209 0.200455 
0.724913 -0.686212 -0.0601274 
0.719168 -0.693349 -0.0454322 
0.404142 -0.860021 0.311502 
0.831117 -0.163662 -0.531469 
0.839223 -0.42235 -0.342528 
0.749129 -0.654934 -0.099338 
0.486609 -0.842629 0.230624 
0.239437 -0.863465 0.443958 
0.765921 -0.62721 -0.141325 
0.315032 -0.865807 0.388759 
0.250732 -0.863829 0.436958 
0.844575 -0.351276 -0.404101 
0.842268 -0.238726 -0.483317 
0.336253 -0.867129 0.367453 
0.830901 -0.466965 -0.302568 
0.81882 -0.0911153 -0.566773 
0.639862 -0.766404 0.0565841 
0.844076 -0.27542 -0.460086 
0.668068 -0.743679 0.025028 
0.263989 -0.863958 0.42882 
0.814821 -0.081083 -0.574015 
0.791898 -0.580735 -0.188797 
0.605106 -0.789202 0.104916 
0.82136 -0.101197 -0.561361 
0.566374 -0.810323 0.150326 
0.847572 -0.330703 -0.415039 
0.527149 -0.82863 0.188379 
0.821694 -0.504648 -0.264856 
0.817329 -0.0920095 -0.568778 
0.842324 -0.396637 -0.364924 
0.460279 -0.8498 0.256871 
0.699707 -0.714205 -0.017931 
0.732812 -0.676891 -0.0693129 
0.416331 -0.858597 0.29913 
0.550207 -0.817722 0.169121 
0.275705 -0.867097 0.414885 
0.828058 -0.145517 -0.541428 
0.676195 -0.736624 0.0120403 
0.819854 -0.0957571 -0.564508 
0.776168 -0.61092 -0.156013 
0.846812 -0.31344 -0.429726 
0.754587 -0.646696 -0.111276 
0.493692 -0.839351 0.227505 
0.841573 -0.214418 -0.495762 
0.81234 -0.530637 -0.241925 
0.376681 -0.861527 0.340415 
0.83285 -0.454753 -0.315533 
0.797881 -0.567314 -0.203814 
0.842916 -0.260268 -0.470906 
0.846004 -0.378369 -0.375652 
0.613545 -0.784117 0.0933982 
0.308278 -0.86719 0.391083 
0.817766 -0.0945441 -0.567732 
0.577962 -0.80359 0.142139 
0.248374 -0.863786 0.438387 
0.235812 -0.862762 0.447252 
0.838577 -0.429242 -0.335469 
0.836072 -0.192275 -0.513823 
0.825786 -0.136826 -0.547134 
0.639849 -0.76582 0.064131 
0.822745 -0.497645 -0.274665 
0.288166 -0.867576 0.405305 
0.706544 -0.706833 -0.034405 
0.760161 -0.638307 -0.121328 
0.336991 -0.865555 0.370476 
0.776873 -0.608009 -0.163686 
0.427697 -0.856525 0.288861 
0.256507 -0.864419 0.432417 
0.845587 -0.363829 -0.390656 
0.846364 -0.299908 -0.440139 
0.735979 -0.672683 -0.0763692 
0.821367 -0.111038 -0.559488 
0.457337 -0.848895 0.264992 
0.523194 -0.829138 0.196973 
0.498819 -0.838197 0.220468 
0.843319 -0.246047 -0.47778 
0.381802 -0.864283 0.327478 
0.677573 -0.735356 0.0121101 
0.79969 -0.563006 -0.208616 
0.650271 -0.758202 0.0477139 
0.543444 -0.820772 0.176074 
0.582081 -0.801891 0.134729 
0.818869 -0.0953212 -0.56601 
0.623487 -0.777346 0.0836498 
0.811163 -0.530641 -0.245833 
0.832563 -0.16685 -0.528205 
0.239893 -0.863265 0.4441 
0.715721 -0.696882 -0.0458121 
0.689347 -0.724401 -0.00660803 
0.838453 -0.41162 -0.357162 
0.826547 -0.481939 -0.290783 
0.842378 -0.226827 -0.488824 
0.844951 -0.356252 -0.398926 
0.264698 -0.864724 0.426834 
0.784431 -0.595239 -0.174237 
0.83254 -0.462682 -0.304633 
0.846892 -0.32825 -0.418361 
0.745216 -0.660226 -0.0935676 
0.347348 -0.867143 0.356949 
0.846057 -0.291855 -0.446103 
0.838079 -0.206092 -0.505123 
0.807873 -0.545191 -0.223849 
0.288172 -0.865381 0.409968 
0.762165 -0.633817 -0.131832 
0.248721 -0.86416 0.437453 
0.462758 -0.847999 0.258364 
0.430128 -0.854637 0.290835 
0.394659 -0.861968 0.318208 
0.588905 -0.799045 0.12132 
0.302499 -0.868264 0.393208 
0.828893 -0.146178 -0.539971 
0.55215 -0.816978 0.166369 
0.627374 -0.774739 0.0786173 
0.650079 -0.75788 0.0549106 
0.841414 -0.395056 -0.368718 
0.835768 -0.440031 -0.328427 
0.821145 -0.111888 -0.559645 
0.523846 -0.827988 0.200053 
0.816347 -0.5183 -0.254839 
0.494517 -0.839482 0.225219 
0.767412 -0.625319 -0.141616 
0.694744 -0.719135 -0.0132681 
0.724912 -0.686478 -0.0570134 
0.817147 -0.102843 -0.567181 
0.249066 -0.865209 0.435177 
0.845818 -0.27648 -0.456235 
0.849286 -0.316072 -0.422861 
0.262892 -0.865302 0.426779 
0.357767 -0.866688 0.347642 
0.815128 -0.0991588 -0.570731 
0.785524 -0.592295 -0.17927 
0.834368 -0.18324 -0.519859 
0.66387 -0.747002 0.0355593 
0.436172 -0.854439 0.282289 
0.233606 -0.863042 0.447868 
0.844811 -0.358938 -0.396809 
0.593832 -0.795442 0.120976 
0.472963 -0.845212 0.248843 
0.747097 -0.657308 -0.098954 
0.843144 -0.258593 -0.471421 
0.707205 -0.706364 -0.0301775 
0.556489 -0.815786 0.157522 
0.824135 -0.494247 -0.276624 
0.842484 -0.386 -0.375799 
0.309834 -0.86841 0.387126 
0.816729 -0.102914 -0.56777 
0.386965 -0.864064 0.321949 
0.803163 -0.553212 -0.221099 
0.817924 -0.115161 -0.563683 
0.24524 -0.864184 0.439368 
0.829073 -0.47181 -0.300055 
0.835416 -0.42669 -0.346434 
0.674972 -0.737576 0.0198651 
0.839167 -0.211599 -0.501023 
0.524736 -0.828754 0.19447 
0.631407 -0.771504 0.0781388 
0.815885 -0.516555 -0.259815 
0.830159 -0.159665 -0.534175 
0.730192 -0.679977 -0.0667217 
0.78911 -0.583511 -0.191885 
0.272954 -0.867954 0.414911 
0.773369 -0.615683 -0.151111 
0.84675 -0.310949 -0.431655 
0.326053 -0.867509 0.375656 
0.567112 -0.810365 0.147281 
0.488403 -0.841531 0.230842 
0.75054 -0.651437 -0.110993 
0.254432 -0.866357 0.429756 
0.444071 -0.852558 0.275582 
0.597074 -0.793976 0.114476 
0.83212 -0.456454 -0.315002 
0.844494 -0.247877 -0.474749 
0.246899 -0.865413 0.436005 
0.844555 -0.358014 -0.398186 
0.68954 -0.724213 -0.00711351 
0.533952 -0.825074 0.184789 
0.640798 -0.764899 0.0656337 
0.836614 -0.196473 -0.511347 
0.845135 -0.292544 -0.447397 
0.839098 -0.417205 -0.349077 
0.816535 -0.108959 -0.56692 
0.39678 -0.861282 0.317424 
0.346844 -0.867673 0.356149 
0.710289 -0.70306 -0.0345792 
0.258694 -0.867379 0.425125 
0.818352 -0.117075 -0.562666 
0.76004 -0.638342 -0.121896 
0.28166 -0.867719 0.409551 
0.495992 -0.839996 0.219997 
0.82868 -0.15135 -0.538872 
0.775904 -0.611193 -0.156257 
0.651651 -0.756923 0.0491797 
0.843341 -0.38864 -0.371127 
0.672198 -0.740015 0.0229915 
0.813694 -0.523145 -0.253422 
0.576386 -0.805235 0.139194 
0.456816 -0.850503 0.2607 
0.787437 -0.586167 -0.190662 
0.840637 -0.223618 -0.49328 
0.543249 -0.821309 0.174162 
0.733175 -0.675563 -0.0779027 
0.799446 -0.563717 -0.207628 
0.82199 -0.498027 -0.276227 
0.832442 -0.446059 -0.328741 
0.844671 -0.341237 -0.412418 
0.313862 -0.868406 0.383877 
0.414973 -0.859408 0.298689 
0.603648 -0.789215 0.112905 
0.806064 -0.54566 -0.229164 
0.264726 -0.869148 0.417734 
0.6957 -0.71826 -0.0102224 
0.845861 -0.277341 -0.455632 
0.293304 -0.868329 0.399973 
0.508245 -0.834025 0.214683 
0.847154 -0.318626 -0.425216 
0.837978 -0.416265 -0.352868 
0.247771 -0.866159 0.434025 
0.761117 -0.635279 -0.130848 
0.842993 -0.259923 -0.47096 
0.714128 -0.698636 -0.0439209 
0.828558 -0.149407 -0.539602 
0.835098 -0.186949 -0.517359 
0.364322 -0.864724 0.34572 
0.743998 -0.661738 -0.0925794 
0.824553 -0.485571 -0.290403 
0.465813 -0.848133 0.252366 
0.581003 -0.80334 0.130695 
0.247784 -0.867392 0.431549 
0.613669 -0.783437 0.0981689 
0.42405 -0.856939 0.292979 
0.777909 -0.60727 -0.161497 
0.67551 -0.737103 0.0191022 
0.843087 -0.383213 -0.377297 
0.544448 -0.820322 0.175068 
0.647988 -0.759424 0.0581997 
0.242189 -0.865193 0.439074 
0.841334 -0.219776 -0.493817 
0.26929 -0.869174 0.414753 
0.517926 -0.830977 0.203049 
0.326575 -0.866823 0.376783 
0.831974 -0.447812 -0.327542 
0.694373 -0.719526 -0.0113098 
0.846517 -0.320123 -0.425358 
0.37613 -0.863605 0.335727 
0.629697 -0.773029 0.0768583 
0.479034 -0.843619 0.242555 
0.809882 -0.537923 -0.233942 
0.835553 -0.169721 -0.522538 
0.253577 -0.867768 0.427408 
0.842945 -0.363474 -0.396649 
0.841028 -0.407414 -0.355929 
0.725439 -0.685735 -0.0592099 
0.746344 -0.658694 -0.0953558 
0.827946 -0.472352 -0.302305 
0.845209 -0.294545 -0.445942 
0.843867 -0.258516 -0.470168 
0.43278 -0.856361 0.281688 
0.78686 -0.589673 -0.182037 
0.762354 -0.633712 -0.131242 
0.814792 -0.519713 -0.256928 
0.285598 -0.868902 0.404282 
0.583983 -0.80038 0.135483 
0.793991 -0.576434 -0.193139 
0.822735 -0.127633 -0.553911 
0.563327 -0.811505 0.155311 
0.394242 -0.861772 0.319252 
0.243504 -0.865998 0.436753 
0.839784 -0.210467 -0.500467 
0.673795 -0.738632 0.0205978 
0.831277 -0.157652 -0.533034 
0.486238 -0.840869 0.237725 
0.649857 -0.758052 0.0551625 
0.520639 -0.829123 0.203691 
0.333437 -0.867451 0.369255 
0.82193 -0.499996 -0.272828 
0.705991 -0.707496 -0.0320361 
0.245607 -0.86667 0.434235 
0.840633 -0.395225 -0.370315 
0.595993 -0.793981 0.119939 
0.276201 -0.869171 0.410189 
0.255424 -0.868329 0.425163 
0.724219 -0.686303 -0.067046 
0.772179 -0.617613 -0.149309 
0.844221 -0.356915 -0.399878 
0.829634 -0.158724 -0.535271 
0.627346 -0.774176 0.0841946 
0.406017 -0.860949 0.306458 
0.297327 -0.868331 0.396986 
0.797638 -0.568475 -0.201519 
0.445748 -0.853561 0.269709 
0.831577 -0.451385 -0.323621 
0.825521 -0.474185 -0.306046 
0.846333 -0.293573 -0.44445 
0.837443 -0.182273 -0.515233 
0.353457 -0.864542 0.357261 
0.556934 -0.814173 0.164155 
0.49842 -0.837299 0.22474 
0.682895 -0.730485 0.00681715 
0.60929 -0.786061 0.104276 
0.845044 -0.317354 -0.430334 
0.803007 -0.553864 -0.220035 
0.742312 -0.663867 -0.0908432 
0.525967 -0.827189 0.197782 
0.837054 -0.428081 -0.340717 
0.842458 -0.247432 -0.478583 
0.831018 -0.155542 -0.534056 
0.651079 -0.757578 0.0466057 
0.811543 -0.530844 -0.244136 
0.709998 -0.703186 -0.0378482 
0.729092 -0.680406 -0.0739757 
0.841283 -0.376642 -0.387793 
0.78099 -0.601808 -0.166979 
0.28218 -0.868866 0.406751 
0.840121 -0.220103 -0.495733 
0.845789 -0.276899 -0.456036 
0.455833 -0.850208 0.263368 
0.832059 -0.163806 -0.529949 
0.569597 -0.808265 0.149219 
0.75564 -0.644262 -0.118043 
0.326047 -0.867002 0.376831 
0.368834 -0.864923 0.340395 
0.82237 -0.496944 -0.277044 
0.409126 -0.860881 0.302489 
0.629947 -0.772873 0.0763869 
0.843904 -0.352085 -0.404799 
0.303127 -0.867555 0.394288 
0.508692 -0.833688 0.214936 
0.258644 -0.869103 0.421621 
0.691717 -0.722139 -0.0065146 
0.770011 -0.620522 -0.148441 
0.537126 -0.822555 0.186814 
0.785289 -0.593456 -0.176439 
0.661539 -0.749093 0.0350027 
0.251491 -0.867794 0.428587 
0.580717 -0.802958 0.134261 
0.713556 -0.699335 -0.0420416 
0.837943 -0.412363 -0.357502 
0.846172 -0.327477 -0.420418 
0.827313 -0.476139 -0.298068 
0.603027 -0.789718 0.112714 
0.290366 -0.86888 0.400918 
0.830697 -0.167436 -0.53095 
0.266613 -0.869027 0.416784 
0.460978 -0.849353 0.257099 
0.340673 -0.866692 0.3644 
0.83071 -0.1492 -0.53634 
0.839204 -0.191317 -0.509052 
0.425478 -0.85585 0.294089 
0.845405 -0.377542 -0.377825 
0.847 -0.275963 -0.454351 
0.381297 -0.862246 0.333383 
0.791486 -0.579269 -0.194929 
0.673829 -0.738619 0.0199058 
0.831036 -0.460628 -0.31177 
0.736998 -0.670599 -0.0844409 
0.544674 -0.819419 0.178557 
0.809709 -0.53422 -0.242858 
0.844446 -0.233854 -0.481896 
0.633452 -0.77006 0.0758024 
0.800702 -0.556575 -0.221589 
0.843885 -0.355872 -0.401515 
0.51056 -0.832473 0.215214 
0.846262 -0.304872 -0.436913 
0.753841 -0.646768 -0.115817 
0.305258 -0.868156 0.391309 
0.769187 -0.622899 -0.142647 
0.82071 -0.502448 -0.271995 
0.718568 -0.693252 -0.055342 
0.689511 -0.724192 -0.0109564 
0.836746 -0.1912 -0.513126 
0.477219 -0.843618 0.24611 
0.832402 -0.159221 -0.530807 
0.272215 -0.868402 0.41446 
0.436272 -0.854647 0.281503 
0.577784 -0.804069 0.140137 
0.616011 -0.782352 0.0919539 
0.256439 -0.869502 0.422144 
0.556083 -0.814693 0.164459 
0.832667 -0.446451 -0.327637 
0.392972 -0.860864 0.323242 
0.839985 -0.416285 -0.34804 
0.842635 -0.22932 -0.487215 
0.64044 -0.765359 0.063741 
0.846199 -0.271899 -0.458277 
0.673513 -0.739033 0.014521 
0.344341 -0.866405 0.361623 
0.770096 -0.620252 -0.149134 
0.288746 -0.870222 0.399174 
0.510113 -0.832786 0.215065 
0.312858 -0.867934 0.38576 
0.833243 -0.160835 -0.528998 
0.821404 -0.497353 -0.27917 
0.84156 -0.390837 -0.372858 
0.701353 -0.712333 -0.0261988 
0.811398 -0.534846 -0.235739 
0.59347 -0.795565 0.121944 
0.843847 -0.366519 -0.391902 
0.78714 -0.587511 -0.187728 
0.836421 -0.181293 -0.517236 
0.652131 -0.75675 0.0453401 
0.750705 -0.652176 -0.105399 
0.847803 -0.30544 -0.433516 
0.73411 -0.674039 -0.082175 
0.437503 -0.85303 0.284483 
0.798577 -0.562381 -0.21448 
0.404505 -0.858627 0.314857 
0.826636 -0.477743 -0.297378 
0.481087 -0.841869 0.244565 
0.266339 -0.869465 0.416046 
0.358028 -0.865032 0.351477 
0.844923 -0.249921 -0.472911 
0.531203 -0.82415 0.196469 
0.554846 -0.814668 0.168709 
0.715752 -0.696702 -0.04801 
0.841279 -0.201785 -0.50153 
0.845462 -0.339718 -0.41205 
0.833629 -0.449174 -0.321412 
0.612574 -0.784403 0.0972876 
0.274195 -0.868992 0.411909 
0.777703 -0.607856 -0.160277 
0.292917 -0.867997 0.400976 
0.68068 -0.73257 0.00412254 
0.755426 -0.642953 -0.126269 
0.811019 -0.531693 -0.24403 
0.843731 -0.384007 -0.375042 
0.412619 -0.857984 0.305955 
0.323531 -0.866443 0.380268 
0.835843 -0.43461 -0.33538 
0.650028 -0.758765 0.0417016 
0.846783 -0.284717 -0.449326 
0.567481 -0.808958 0.153468 
0.622242 -0.778075 0.086105 
0.583654 -0.801049 0.132921 
0.837336 -0.168204 -0.52017 
0.487355 -0.839759 0.239353 
0.373017 -0.861975 0.343305 
0.697108 -0.716737 -0.018139 
0.732036 -0.676762 -0.078211 
0.282687 -0.86886 0.406412 
0.839033 -0.178965 -0.513805 
0.796101 -0.567374 -0.210497 
0.840424 -0.199995 -0.503676 
0.838024 -0.411548 -0.358251 
0.444496 -0.851622 0.277784 
0.530581 -0.82509 0.194192 
0.845131 -0.242627 -0.476326 
0.825418 -0.479608 -0.297761 
0.780901 -0.601079 -0.169995 
0.81566 -0.512969 -0.267508 
0.30289 -0.867441 0.39472 
0.847787 -0.340928 -0.406234 
0.76036 -0.6362 -0.130774 
0.718213 -0.694125 -0.0485873 
0.845665 -0.373188 -0.381552 
0.628026 -0.774383 0.0769061 
0.270498 -0.868946 0.414443 
0.330387 -0.86713 0.372733 
0.657009 -0.75307 0.0350112 
0.493623 -0.837618 0.233948 
0.417445 -0.856006 0.304948 
0.741252 -0.66427 -0.0963903 
0.844551 -0.222196 -0.487199 
0.377257 -0.862994 0.336033 
0.677837 -0.735155 0.00913437 
0.848553 -0.276883 -0.450882 
0.838964 -0.185251 -0.511684 
0.830372 -0.463971 -0.308566 
0.290135 -0.867965 0.40306 
0.586616 -0.800165 0.124971 
0.456212 -0.849523 0.264918 
0.79939 -0.558065 -0.222574 
0.765507 -0.627924 -0.140392 
0.537154 -0.822868 0.185349 
0.848505 -0.330167 -0.413556 
0.558674 -0.813099 0.163564 
0.832141 -0.448104 -0.326717 
0.306525 -0.869283 0.387801 
0.839169 -0.412941 -0.353942 
0.694817 -0.719002 -0.0162855 
0.844801 -0.371286 -0.385302 
0.805189 -0.544662 -0.23455 
0.634844 -0.769941 0.0645223 
0.781825 -0.598573 -0.174528 
0.838277 -0.179912 -0.514707 
0.81945 -0.506533 -0.26819 
0.278512 -0.868574 0.40989 
0.341233 -0.866056 0.365387 
0.603943 -0.790026 0.105409 
0.739981 -0.666151 -0.0931166 
0.84472 -0.215896 -0.489732 
0.461353 -0.847981 0.260925 
0.710685 -0.702098 -0.0445526 
0.499156 -0.836811 0.224925 
0.83429 -0.160805 -0.527354 
0.848296 -0.312381 -0.427564 
0.849074 -0.258775 -0.460554 
0.29521 -0.868257 0.398724 
0.41863 -0.855406 0.305008 
0.658778 -0.75163 0.0326212 
0.788022 -0.586215 -0.188079 
0.83778 -0.167969 -0.51953 
0.386315 -0.862399 0.327154 
0.560227 -0.813545 0.155853 
0.749553 -0.652889 -0.109117 
0.845952 -0.359831 -0.393557 
0.822874 -0.495705 -0.27777 
0.316373 -0.868161 0.382367 
0.284612 -0.867981 0.406946 
0.834792 -0.4417 -0.328669 
0.61458 -0.783042 0.0955864 
0.671129 -0.741227 0.0129771 
0.843256 -0.204496 -0.497092 
0.843744 -0.39815 -0.359962 
0.767382 -0.624802 -0.144039 
0.346399 -0.86714 0.357877 
0.722298 -0.688749 -0.0625284 
0.838039 -0.183004 -0.514005 
0.534531 -0.823716 0.189126 
0.503695 -0.835265 0.220508 
0.69343 -0.720368 -0.0149942 
0.827418 -0.477433 -0.295699 
0.431287 -0.854638 0.289112 
0.850282 -0.29264 -0.437472 
0.635131 -0.769491 0.0670291 
0.575408 -0.805783 0.14007 
0.847718 -0.251647 -0.466956 
0.792459 -0.575605 -0.201712 
0.470517 -0.84322 0.259986 
0.838991 -0.187781 -0.510717 
0.294462 -0.867228 0.401508 
0.837256 -0.427526 -0.340917 
0.751731 -0.649682 -0.1132 
0.847191 -0.346497 -0.402749 
0.537181 -0.823241 0.183603 
0.810642 -0.534715 -0.238618 
0.329382 -0.866605 0.374839 
0.734672 -0.67328 -0.0833666 
0.843534 -0.387139 -0.372254 
0.771681 -0.616837 -0.154987 
0.799316 -0.560144 -0.217561 
0.287314 -0.868379 0.404188 
0.836585 -0.172566 -0.519949 
0.845737 -0.233848 -0.47963 
0.650353 -0.758054 0.0489417 
0.587997 -0.799221 0.124522 
0.379019 -0.86302 0.333977 
0.672616 -0.739795 0.0170976 
0.700759 -0.712904 -0.026555 
0.398904 -0.859762 0.31888 
0.84793 -0.287009 -0.44569 
0.828732 -0.475261 -0.295517 
0.605604 -0.78876 0.105366 
0.811531 -0.529343 -0.247415 
0.313415 -0.866615 0.388264 
0.354988 -0.864068 0.356889 
0.777435 -0.605291 -0.170932 
0.43571 -0.852623 0.288427 
0.838347 -0.177036 -0.51559 
0.549543 -0.817703 0.171361 
0.849567 -0.332829 -0.40922 
0.715876 -0.696137 -0.0539859 
0.475145 -0.845014 0.245335 
0.496064 -0.838478 0.225557 
0.759519 -0.638484 -0.124374 
0.839592 -0.426624 -0.33627 
0.627062 -0.775141 0.0771391 
0.843016 -0.21722 -0.492076 
0.847469 -0.266087 -0.45934 
0.817997 -0.512462 -0.261272 
0.832822 -0.459163 -0.309155 
0.32929 -0.866183 0.375894 
0.732679 -0.675882 -0.079785 
0.562514 -0.811763 0.156905 
0.849045 -0.317378 -0.422368 
0.683269 -0.730153 0.00446421 
0.844128 -0.391183 -0.366639 
0.291866 -0.868484 0.400687 
0.455362 -0.848611 0.269267 
0.787618 -0.587826 -0.184712 
0.701971 -0.711518 -0.0312898 
0.839486 -0.195073 -0.507158 
0.652144 -0.756641 0.0469335 
0.607655 -0.787139 0.105681 
0.50937 -0.834877 0.208619 
0.30102 -0.867636 0.395721 
0.407663 -0.857423 0.314065 
0.317805 -0.866609 0.384695 
0.84127 -0.412834 -0.349045 
0.799405 -0.562759 -0.210368 
0.761607 -0.634591 -0.131336 
0.377116 -0.861166 0.340848 
0.743249 -0.66254 -0.0928494 
0.575291 -0.80514 0.14419 
0.846211 -0.25263 -0.469153 
0.819397 -0.50583 -0.269674 
0.834132 -0.451156 -0.317304 
0.848574 -0.305506 -0.431958 
0.341535 -0.865031 0.367526 
0.662017 -0.748864 0.0306157 
0.834684 -0.163989 -0.525747 
0.846706 -0.373023 -0.379398 
0.807277 -0.54405 -0.228722 
0.470885 -0.846215 0.249374 
0.424462 -0.854989 0.298037 
0.710857 -0.701793 -0.0465656 
0.767498 -0.623339 -0.149651 
0.839295 -0.191168 -0.508958 
0.623873 -0.777322 0.0809486 
0.532601 -0.825317 0.187584 
0.844654 -0.233861 -0.481527 
0.678028 -0.735015 0.00556871 
0.3116 -0.866904 0.389079 
0.325573 -0.866568 0.378236 
0.54925 -0.818068 0.170555 
0.437601 -0.852839 0.284906 
0.826043 -0.483653 -0.289367 
0.576418 -0.805144 0.139592 
0.837259 -0.17801 -0.517019 
0.484486 -0.842957 0.233872 
0.83369 -0.167003 -0.526375 
0.290831 -0.867851 0.402805 
0.84583 -0.36263 -0.391244 
0.782233 -0.598675 -0.172337 
0.834205 -0.448846 -0.320373 
0.743368 -0.661016 -0.102283 
0.724666 -0.685821 -0.0671523 
0.597784 -0.793901 0.111247 
0.812971 -0.533137 -0.234186 
0.841697 -0.222986 -0.491755 
0.842473 -0.405858 -0.354286 
0.692694 -0.721058 -0.0157894 
0.374911 -0.863813 0.336556 
0.502896 -0.836798 0.216483 
0.849156 -0.297434 -0.436425 
0.31334 -0.865961 0.389782 
0.639368 -0.766207 0.0643113 
0.655959 -0.754058 0.0333924 
0.345483 -0.865718 0.36218 
0.794734 -0.574132 -0.196904 
0.847917 -0.348 -0.399917 
0.817903 -0.51715 -0.252171 
0.828727 -0.475941 -0.294436 
0.751608 -0.650085 -0.111693 
0.764658 -0.6293 -0.138852 
0.705641 -0.707505 -0.0388252 
0.839764 -0.203379 -0.503421 
0.394364 -0.859949 0.323982 
0.413477 -0.856017 0.310275 
0.836744 -0.437244 -0.329662 
0.524775 -0.8279 0.197973 
0.847225 -0.28663 -0.447273 
0.459378 -0.848683 0.262124 
0.32332 -0.866429 0.38048 
0.549271 -0.818728 0.167289 
0.843278 -0.395486 -0.363967 
0.846052 -0.259289 -0.465795 
0.290696 -0.865634 0.407644 
0.836583 -0.19288 -0.512764 
0.614051 -0.783418 0.0959012 
0.723257 -0.68731 -0.0671082 
0.667857 -0.744042 0.0191804 
0.832528 -0.161148 -0.530027 
0.572588 -0.807077 0.144115 
0.798392 -0.566261 -0.204742 
0.687951 -0.725639 -0.0130586 
0.848848 -0.334537 -0.409319 
0.471432 -0.845988 0.249111 
0.780268 -0.603574 -0.163955 
0.633393 -0.770844 0.0679246 
0.842461 -0.241077 -0.48181 
0.819852 -0.508213 -0.263749 
0.308747 -0.865102 0.395315 
0.429859 -0.853731 0.293879 
0.489777 -0.839233 0.236233 
0.845321 -0.378508 -0.377046 
0.589303 -0.798346 0.123962 
0.358533 -0.862242 0.35776 
0.839813 -0.421922 -0.341608 
0.735749 -0.672195 -0.0826292 
0.831407 -0.466079 -0.302543 
0.528757 -0.826497 0.193181 
0.747082 -0.655999 -0.107399 
0.710569 -0.702316 -0.0429492 
0.646364 -0.761449 0.0490832 
0.806337 -0.546612 -0.22591 
0.847397 -0.325959 -0.419129 
0.834846 -0.176668 -0.521365 
0.320428 -0.86503 0.386068 
0.785471 -0.592345 -0.17934 
0.294972 -0.86575 0.404314 
0.833228 -0.165859 -0.527467 
0.838989 -0.215018 -0.499865 
0.667293 -0.744573 0.0181878 
0.848227 -0.293989 -0.440548 
0.754307 -0.645291 -0.120916 
0.823463 -0.498588 -0.270773 
0.381004 -0.860808 0.33741 
0.60823 -0.78746 0.0998153 
0.545851 -0.819781 0.173224 
0.499921 -0.837514 0.220568 
0.438233 -0.852946 0.283611 
0.834764 -0.454594 -0.310666 
0.847182 -0.373859 -0.377507 
0.314559 -0.865525 0.389767 
0.840102 -0.419417 -0.343975 
0.809226 -0.538476 -0.234939 
0.689333 -0.724309 -0.0139932 
0.715412 -0.696528 -0.0550864 
0.560606 -0.813351 0.155503 
0.842938 -0.251633 -0.475538 
0.402976 -0.857871 0.318852 
0.356968 -0.864806 0.353107 
0.649457 -0.759219 0.0423259 
0.840045 -0.203238 -0.50301 
0.846808 -0.27112 -0.457614 
0.730663 -0.678139 -0.0791075 
0.833546 -0.176781 -0.523402 
0.305704 -0.865266 0.397316 
0.765425 -0.627849 -0.141172 
0.46254 -0.847364 0.260826 
0.790638 -0.583498 -0.185531 
0.84852 -0.351603 -0.395461 
0.621485 -0.779136 0.0818726 
0.586767 -0.79964 0.127595 
0.331813 -0.863854 0.37902 
0.413984 -0.857095 0.306603 
0.512389 -0.833942 0.204934 
0.84835 -0.327223 -0.416205 
0.823052 -0.492666 -0.282606 
0.835239 -0.447213 -0.319963 
0.741311 -0.664553 -0.0939495 
0.695496 -0.718098 -0.0249123 
0.834777 -0.16817 -0.524276 
0.841732 -0.412711 -0.348075 
0.770408 -0.618948 -0.152886 
0.315536 -0.865466 0.389109 
0.663052 -0.748218 0.0230558 
0.297335 -0.865143 0.40388 
0.809175 -0.536981 -0.238511 
0.838845 -0.192067 -0.509361 
0.625556 -0.776748 0.0730908 
0.792834 -0.576971 -0.19626 
0.468051 -0.846404 0.254026 
0.849401 -0.304544 -0.431013 
0.373439 -0.861169 0.344866 
0.532607 -0.826063 0.184253 
0.842885 -0.248733 -0.477155 
0.306182 -0.86571 0.395979 
0.433438 -0.853266 0.289945 
0.560411 -0.813036 0.157836 
0.712727 -0.700026 -0.0445409 
0.486911 -0.841315 0.234748 
0.593868 -0.795981 0.1172 
0.842936 -0.403159 -0.356261 
0.828219 -0.478407 -0.291857 
0.652304 -0.756814 0.0416185 
0.844464 -0.278675 -0.457406 
0.846508 -0.352458 -0.398996 
0.800866 -0.561713 -0.207585 
0.815425 -0.520061 -0.254203 
0.334969 -0.865437 0.372579 
0.841271 -0.228849 -0.489787 
0.383044 -0.860366 0.336226 
0.676734 -0.736204 0.00584855 
0.83359 -0.16894 -0.525915 
0.699047 -0.714582 -0.0265798 
0.7446 -0.660156 -0.0988221 
0.776683 -0.609145 -0.160326 
0.728551 -0.681611 -0.0679648 
0.321247 -0.866072 0.38304 
0.601623 -0.791697 0.106144 
0.834598 -0.451748 -0.315228 
0.755782 -0.643264 -0.122492 
0.440627 -0.852363 0.281647 
0.399566 -0.859512 0.318727 
0.83233 -0.163364 -0.529659 
0.510617 -0.834259 0.208046 
0.569593 -0.809331 0.143344 
0.819062 -0.508857 -0.264956 
0.837163 -0.188669 -0.513384 
0.847216 -0.342907 -0.405759 
0.62569 -0.776296 0.0766629 
0.845856 -0.270342 -0.459828 
0.529597 -0.826908 0.189076 
0.838606 -0.434926 -0.327992 
0.309161 -0.866159 0.392668 
0.844036 -0.39667 -0.36091 
0.847919 -0.322502 -0.420745 
0.683251 -0.730177 -0.00312933 
0.479299 -0.844374 0.239383 
0.333044 -0.866156 0.372633 
0.826668 -0.479628 -0.29424 
0.653948 -0.755593 0.0378306 
0.779263 -0.604589 -0.164988 
0.708763 -0.704225 -0.0415019 
0.460983 -0.847469 0.263229 
0.803347 -0.550399 -0.227363 
0.611155 -0.786048 0.0928319 
0.837501 -0.183579 -0.514675 
0.845119 -0.252209 -0.471344 
0.577148 -0.805233 0.136013 
0.844562 -0.227805 -0.484583 
0.75967 -0.637313 -0.129355 
0.724127 -0.686286 -0.0681972 
0.407531 -0.858077 0.312447 
0.351936 -0.865144 0.357305 
0.78586 -0.591196 -0.181417 
0.31957 -0.866682 0.383063 
0.540656 -0.822643 0.175928 
0.741807 -0.664594 -0.0896554 
0.659949 -0.750771 0.0284633 
0.8084 -0.541048 -0.231854 
0.689421 -0.724288 -0.0102908 
0.845203 -0.383767 -0.371961 
0.840295 -0.424071 -0.337741 
0.500503 -0.836479 0.223157 
0.633509 -0.77087 0.0665298 
0.821274 -0.502342 -0.270484 
0.833846 -0.173783 -0.523928 
0.848801 -0.308981 -0.429032 
0.369299 -0.863053 0.344614 
0.833177 -0.46531 -0.298835 
0.433035 -0.854129 0.288 
0.840261 -0.20838 -0.500538 
0.764187 -0.632359 -0.127045 
0.831288 -0.170506 -0.529044 
0.845718 -0.363185 -0.39097 
0.312191 -0.866735 0.388983 
0.707965 -0.705111 -0.0400363 
0.581003 -0.804241 0.125026 
0.55113 -0.818496 0.162236 
0.605823 -0.788993 0.102314 
0.846309 -0.288571 -0.447759 
0.834243 -0.17833 -0.521763 
0.303752 -0.865829 0.397587 
0.478526 -0.842574 0.247146 
0.840278 -0.416354 -0.347249 
0.813337 -0.528983 -0.242198 
0.516413 -0.831745 0.20376 
0.670006 -0.742064 0.0208272 
0.830621 -0.162016 -0.532746 
0.790923 -0.580839 -0.192528 
0.327755 -0.866747 0.375935 
0.455482 -0.850103 0.264313 
0.838345 -0.198541 -0.5077 
0.773564 -0.615906 -0.149192 
0.824776 -0.49159 -0.279435 
0.834102 -0.45288 -0.314918 
0.638413 -0.767331 0.060276 
0.846256 -0.343698 -0.407091 
0.693169 -0.720639 -0.0140117 
0.844302 -0.243288 -0.477458 
0.382066 -0.862141 0.332775 
0.738577 -0.668785 -0.0850343 
0.721422 -0.689764 -0.0614578 
0.798757 -0.56588 -0.204369 
0.346275 -0.866096 0.360516 
0.845618 -0.275608 -0.457133 
0.314714 -0.867357 0.385547 
0.399954 -0.860741 0.3149 
0.528396 -0.827565 0.189563 
0.831917 -0.165196 -0.52974 
0.553147 -0.817583 0.159957 
0.832213 -0.175544 -0.525933 
0.646976 -0.760768 0.051516 
0.841497 -0.408443 -0.353635 
0.779121 -0.605048 -0.163976 
0.6095 -0.786852 0.0968127 
0.480996 -0.842794 0.241539 
0.834795 -0.448997 -0.318618 
0.744556 -0.660405 -0.0974803 
0.8425 -0.227598 -0.488254 
0.825656 -0.487772 -0.283497 
0.671332 -0.740972 0.016533 
0.425218 -0.856503 0.292561 
0.576138 -0.805893 0.136384 
0.815726 -0.526494 -0.239572 
0.362395 -0.864784 0.34759 
0.844322 -0.383593 -0.374135 
0.75997 -0.63862 -0.120869 
0.848394 -0.336617 -0.408554 
0.696284 -0.717481 -0.020259 
0.299223 -0.866563 0.399418 
0.801311 -0.557172 -0.217853 
0.838038 -0.190564 -0.511251 
0.454653 -0.850358 0.264918 
0.321368 -0.867939 0.378689 
0.308256 -0.867032 0.39145 
0.845475 -0.276667 -0.456758 
0.720035 -0.691601 -0.0568982 
0.491966 -0.840685 0.226313 
0.833528 -0.177923 -0.523044 
0.622131 -0.778705 0.0810648 
0.840164 -0.212174 -0.499106 
0.829925 -0.47192 -0.297518 
0.783785 -0.597255 -0.170199 
0.586831 -0.800399 0.122436 
0.526343 -0.829199 0.188126 
0.375161 -0.863155 0.337962 
0.649471 -0.758973 0.04633 
0.763685 -0.632633 -0.128689 
0.843737 -0.378716 -0.380372 
0.344192 -0.867537 0.359042 
0.815093 -0.523337 -0.248479 
0.70292 -0.710749 -0.0272106 
0.543988 -0.821526 0.170801 
0.788468 -0.585895 -0.187206 
0.677567 -0.735386 0.0104792 
0.848469 -0.317218 -0.423642 
0.391882 -0.862517 0.320147 
0.833687 -0.170211 -0.525351 
0.83471 -0.185032 -0.518674 
0.728339 -0.681869 -0.0676593 
0.847546 -0.273548 -0.454794 
0.428875 -0.856962 0.285801 
0.832055 -0.455609 -0.316393 
0.312266 -0.86886 0.384152 
0.743139 -0.663158 -0.089246 
0.599529 -0.792807 0.109645 
0.823034 -0.501496 -0.266679 
0.836283 -0.430146 -0.340006 
0.463771 -0.847761 0.25733 
0.844531 -0.368077 -0.388955 
0.804035 -0.554615 -0.214313 
0.768197 -0.62559 -0.136054 
0.326819 -0.869465 0.370431 
0.629913 -0.773319 0.072019 
0.838478 -0.208643 -0.50341 
0.557731 -0.814908 0.157672 
0.356135 -0.865967 0.351096 
0.846096 -0.252375 -0.469498 
0.491845 -0.840441 0.227481 
0.845493 -0.319029 -0.428208 
0.654998 -0.75479 0.0356359 
0.519367 -0.831028 0.199124 
0.708125 -0.705091 -0.0374815 
0.678425 -0.734659 0.00388789 
0.827405 -0.481322 -0.289362 
0.840382 -0.413822 -0.350014 
0.834766 -0.182338 -0.519536 
0.434485 -0.856249 0.279394 
0.575769 -0.805369 0.140966 
0.371917 -0.864006 0.339369 
0.606204 -0.789222 0.0982144 
0.74921 -0.655071 -0.097812 
0.792109 -0.580671 -0.188109 
0.777777 -0.60803 -0.159254 
0.845945 -0.352266 -0.400357 
0.808951 -0.542939 -0.225422 
0.836514 -0.192681 -0.512951 
0.632645 -0.771632 0.0659084 
0.390329 -0.862426 0.322282 
0.329517 -0.869135 0.368812 
0.461768 -0.848529 0.258396 
0.353272 -0.865909 0.35412 
0.811616 -0.533248 -0.238592 
0.832527 -0.177414 -0.524808 
0.752487 -0.650056 -0.105785 
0.842337 -0.402129 -0.358832 
0.83356 -0.454232 -0.314406 
0.845212 -0.292051 -0.447574 
0.526216 -0.829189 0.188529 
0.660481 -0.750081 0.0338133 
0.723929 -0.687751 -0.0540806 
0.492568 -0.839697 0.228659 
0.819232 -0.511027 -0.260211 
0.312605 -0.868875 0.383842 
0.683463 -0.729983 -0.00199804 
0.845276 -0.341325 -0.411102 
0.587435 -0.799245 0.126995 
0.834635 -0.191449 -0.51646 
0.845733 -0.256483 -0.467923 
0.548482 -0.818873 0.169155 
0.403817 -0.860472 0.310678 
0.833858 -0.445991 -0.325227 
0.832131 -0.173686 -0.52668 
0.609273 -0.787095 0.0962667 
0.432913 -0.856388 0.281399 
0.797897 -0.572069 -0.189995 
0.731885 -0.678052 -0.0677482 
0.7619 -0.635484 -0.125174 
0.84005 -0.231513 -0.49063 
0.825571 -0.486569 -0.285803 
0.703453 -0.710241 -0.0266786 
0.338886 -0.868315 0.362195 
0.843396 -0.388055 -0.371614 
0.773968 -0.6159 -0.14711 
0.370479 -0.864098 0.340705 
0.634562 -0.770282 0.0632118 
0.843571 -0.329948 -0.423701 
0.459773 -0.849789 0.257811 
0.499198 -0.838904 0.216891 
0.835202 -0.193959 -0.514605 
0.667194 -0.744535 0.0228172 
0.735893 -0.672907 -0.0752159 
0.844343 -0.2988 -0.444751 
0.554608 -0.816239 0.161751 
0.800195 -0.562078 -0.209179 
0.837746 -0.42858 -0.33838 
0.347411 -0.865473 0.360919 
0.835752 -0.184955 -0.51702 
0.381645 -0.862344 0.332732 
0.583859 -0.801381 0.129988 
0.322572 -0.868102 0.377289 
0.827111 -0.479185 -0.293716 
0.842664 -0.216593 -0.492956 
0.520435 -0.830077 0.2003 
0.80953 -0.540046 -0.230244 
0.402534 -0.861918 0.308323 
0.8162 -0.518977 -0.253931 
0.740621 -0.666409 -0.0859101 
0.428261 -0.855596 0.290771 
0.609337 -0.787271 0.0944126 
0.467204 -0.848831 0.247399 
0.840534 -0.392037 -0.373911 
0.843314 -0.264845 -0.467631 
0.780895 -0.603987 -0.159381 
0.844628 -0.357809 -0.398217 
0.643612 -0.763399 0.0546346 
0.710347 -0.702884 -0.0368915 
0.68194 -0.731393 0.00470503 
0.834116 -0.179998 -0.521393 
0.833521 -0.454859 -0.313601 
0.75876 -0.640631 -0.117794 
0.527901 -0.827657 0.190536 
0.784772 -0.595349 -0.172318 
0.839093 -0.208224 -0.502558 
0.692182 -0.721705 -0.00504125 
0.353238 -0.866059 0.353786 
0.845239 -0.340817 -0.411601 
0.380255 -0.862111 0.33492 
0.557014 -0.815615 0.156547 
0.838998 -0.420851 -0.344916 
0.842655 -0.250207 -0.47679 
0.619524 -0.780608 0.0827096 
0.71951 -0.692873 -0.0472541 
0.438205 -0.855005 0.277386 
0.585389 -0.801028 0.125195 
0.483984 -0.843347 0.233508 
0.343396 -0.866162 0.363102 
0.652913 -0.756278 0.0418138 
0.847097 -0.310733 -0.431128 
0.768688 -0.626105 -0.130813 
0.398512 -0.86088 0.316345 
0.743806 -0.662493 -0.0886295 
0.838042 -0.196619 -0.508947 
0.837979 -0.435303 -0.329093 
0.789006 -0.584745 -0.188531 
0.358997 -0.865739 0.348736 
0.82694 -0.483755 -0.286621 
0.806132 -0.546356 -0.227257 
0.727259 -0.683833 -0.0588775 
0.816155 -0.519293 -0.253429 
0.843962 -0.237928 -0.480748 
0.836826 -0.197286 -0.510686 
0.568266 -0.810414 0.142486 
0.494738 -0.839303 0.225397 
0.527789 -0.827989 0.189401 
0.833745 -0.178235 -0.522592 
0.840118 -0.413517 -0.351007 
0.453889 -0.850991 0.264195 
0.841887 -0.385054 -0.378099 
0.628793 -0.774083 0.0735844 
0.830929 -0.468945 -0.299411 
0.411385 -0.859518 0.303299 
0.594664 -0.795827 0.114163 
0.666293 -0.745213 0.026683 
0.698555 -0.715321 -0.0183343 
0.84633 -0.348772 -0.402597 
0.339227 -0.863985 0.372096 
0.770987 -0.620601 -0.142942 
0.846756 -0.29709 -0.441295 
0.377465 -0.863198 0.335275 
0.749289 -0.65529 -0.0957128 
0.840116 -0.226346 -0.492922 
0.777126 -0.609902 -0.155226 
0.634468 -0.769923 0.0683293 
0.682141 -0.731129 0.0115977 
0.363254 -0.865229 0.34558 
0.542226 -0.822457 0.171915 
0.845887 -0.271153 -0.459293 
0.836214 -0.431815 -0.338056 
0.793961 -0.574139 -0.199978 
0.500366 -0.837896 0.218093 
0.722427 -0.688882 -0.059512 
0.467518 -0.847161 0.252477 
0.702515 -0.711256 -0.0242355 
0.836274 -0.185585 -0.51595 
0.838657 -0.207125 -0.503739 
0.814997 -0.521136 -0.25337 
0.420489 -0.859322 0.291128 
0.844165 -0.335679 -0.417978 
0.842758 -0.379596 -0.381662 
0.63876 -0.766799 0.0632753 
0.385609 -0.863083 0.32618 
0.569716 -0.809404 0.142443 
0.329126 -0.863956 0.381125 
0.752054 -0.65027 -0.107535 
0.805544 -0.549889 -0.220728 
0.59846 -0.793249 0.112255 
0.821853 -0.500874 -0.271445 
0.835392 -0.180804 -0.519067 
0.843941 -0.252653 -0.473212 
0.839495 -0.414768 -0.351021 
0.830223 -0.466222 -0.305561 
0.514709 -0.833373 0.201404 
0.837107 -0.203595 -0.507741 
0.780852 -0.603199 -0.162546 
0.548091 -0.819447 0.167639 
0.611286 -0.785188 0.0990425 
0.709229 -0.704237 -0.0323275 
0.430567 -0.857183 0.282575 
0.654915 -0.754361 0.0450091 
0.473238 -0.845948 0.2458 
0.399606 -0.861256 0.313931 
0.84517 -0.305038 -0.438906 
0.6836 -0.729856 0.000747291 
0.760482 -0.637499 -0.123541 
0.335487 -0.864184 0.375014 
0.726804 -0.683681 -0.0658541 
0.359703 -0.866641 0.345756 
0.835685 -0.442403 -0.325439 
0.845966 -0.333938 -0.415724 
0.842305 -0.249821 -0.47761 
0.82419 -0.490757 -0.28261 
0.66567 -0.745523 0.0328453 
0.621519 -0.778272 0.0894797 
0.569567 -0.808089 0.150286 
0.839258 -0.195669 -0.507306 
0.787133 -0.587856 -0.186676 
0.843384 -0.380655 -0.379217 
0.804225 -0.549844 -0.225598 
0.838584 -0.410456 -0.358193 
0.846952 -0.285275 -0.448653 
0.488353 -0.842417 0.227693 
0.32055 -0.864909 0.386239 
0.835753 -0.186819 -0.516349 
0.519598 -0.831451 0.19674 
0.44054 -0.854032 0.276684 
0.763511 -0.632034 -0.132602 
0.692476 -0.721351 -0.0113859 
0.364057 -0.866008 0.342773 
0.7331 -0.675735 -0.0771211 
0.815078 -0.522972 -0.249296 
0.709964 -0.703074 -0.0404672 
0.826019 -0.481473 -0.293047 
0.543331 -0.820253 0.178819 
0.83558 -0.186883 -0.516606 
0.576237 -0.80542 0.13874 
0.397388 -0.862433 0.313516 
0.62823 -0.774095 0.0781264 
0.839752 -0.220173 -0.496327 
0.844435 -0.272909 -0.460924 
0.833953 -0.441132 -0.331549 
0.775683 -0.612146 -0.153601 
0.845946 -0.366351 -0.387509 
0.331793 -0.865166 0.376035 
0.321061 -0.866845 0.381444 
0.738287 -0.668359 -0.0907108 
0.847013 -0.316571 -0.427026 
0.591595 -0.797106 0.120987 
0.793092 -0.576066 -0.197871 
0.371766 -0.864933 0.337167 
0.414804 -0.859638 0.298263 
0.6428 -0.763294 0.0647311 
0.838695 -0.196754 -0.507817 
0.454096 -0.851826 0.26113 
0.666238 -0.745069 0.0316177 
0.693677 -0.720242 -0.00796415 
0.717741 -0.694445 -0.05093 
0.821091 -0.504418 -0.267155 
0.842722 -0.260564 -0.471091 
0.489199 -0.842023 0.227335 
0.84751 -0.352992 -0.396388 
0.515052 -0.832202 0.205332 
0.837542 -0.415522 -0.354775 
0.328193 -0.866872 0.375263 
0.829189 -0.468655 -0.304645 
0.840269 -0.217064 -0.496822 
0.747102 -0.656406 -0.104743 
0.836737 -0.195774 -0.511414 
0.556967 -0.814739 0.161205 
0.608092 -0.786412 0.108536 
0.803173 -0.554848 -0.216924 
0.834479 -0.44261 -0.328238 
0.756779 -0.643379 -0.115539 
0.778039 -0.606155 -0.165018 
0.423333 -0.857821 0.291431 
0.724263 -0.686521 -0.0642778 
0.808133 -0.536628 -0.2428 
0.672848 -0.739292 0.0268786 
0.844176 -0.316857 -0.4324 
0.700494 -0.713383 -0.0198333 
0.383602 -0.863446 0.327583 
0.644713 -0.761676 0.0647715 
0.52357 -0.828644 0.198049 
0.622418 -0.777422 0.0906103 
0.842872 -0.243964 -0.479633 
0.460347 -0.850186 0.255468 
0.56636 -0.810289 0.150558 
0.835195 -0.185004 -0.517903 
0.352054 -0.865712 0.35581 
0.316445 -0.865754 0.387728 
0.823311 -0.498707 -0.271018 
0.766049 -0.629129 -0.131782 
0.844218 -0.38577 -0.372126 
0.837508 -0.200327 -0.50838 
0.84362 -0.295929 -0.448031 
0.386923 -0.86417 0.321716 
0.489222 -0.841678 0.228562 
0.784548 -0.592466 -0.182945 
0.84405 -0.352043 -0.404531 
0.576157 -0.80496 0.141715 
0.729621 -0.679568 -0.0764245 
0.826889 -0.474512 -0.301815 
0.837264 -0.193169 -0.511542 
0.838103 -0.42038 -0.347656 
0.709172 -0.704081 -0.036673 
0.680691 -0.732474 0.011927 
0.812551 -0.52894 -0.244916 
0.319626 -0.867905 0.380236 
0.840232 -0.23054 -0.490776 
0.419427 -0.857532 0.297859 
0.844783 -0.280062 -0.455968 
0.652845 -0.755543 0.0542869 
0.82201 -0.495582 -0.280532 
0.528585 -0.826448 0.193857 
0.833989 -0.450345 -0.318829 
0.791799 -0.578233 -0.196727 
0.739648 -0.667529 -0.0855896 
0.591291 -0.7962 0.128222 
0.622218 -0.777855 0.0882395 
0.354916 -0.866192 0.351776 
0.767552 -0.625215 -0.141315 
0.45569 -0.849253 0.266675 
0.843463 -0.255033 -0.472787 
0.844914 -0.344795 -0.408946 
0.83758 -0.198768 -0.508873 
0.752999 -0.649548 -0.105262 
0.843516 -0.376638 -0.382916 
0.498264 -0.838306 0.221305 
0.801354 -0.560865 -0.207993 
0.839221 -0.203591 -0.50424 
0.394472 -0.861851 0.318756 
0.321216 -0.867895 0.378919 
0.685541 -0.728031 -0.00196058 
0.716062 -0.696404 -0.0477142 
0.656598 -0.753016 0.0429755 
0.548784 -0.818451 0.170217 
0.364935 -0.864732 0.345052 
0.421467 -0.855911 0.299638 
0.845634 -0.326895 -0.421952 
0.841349 -0.40894 -0.353412 
0.465994 -0.847377 0.25456 
0.565599 -0.810655 0.151445 
0.814821 -0.523271 -0.249508 
0.827275 -0.478041 -0.295116 
0.719827 -0.691915 -0.0557003 
0.845905 -0.288631 -0.448483 
0.777663 -0.607445 -0.162021 
0.627474 -0.774432 0.0808181 
0.800776 -0.559 -0.215121 
0.596008 -0.794204 0.118383 
0.842088 -0.242283 -0.481858 
0.692104 -0.721668 -0.0136951 
0.496662 -0.838575 0.223873 
0.837626 -0.435705 -0.329459 
0.842419 -0.369563 -0.392114 
0.753786 -0.647027 -0.114728 
0.822231 -0.498988 -0.273765 
0.786432 -0.591148 -0.179079 
0.836137 -0.202408 -0.509809 
0.665574 -0.745821 0.0275928 
0.320877 -0.868153 0.378614 
0.731769 -0.677674 -0.0726127 
0.394218 -0.862813 0.316459 
0.523461 -0.828218 0.200108 
0.635789 -0.768583 0.071086 
0.375376 -0.865155 0.332565 
0.838428 -0.216382 -0.500216 
0.842097 -0.275485 -0.46366 
0.578021 -0.803011 0.145142 
0.424543 -0.856519 0.293492 
0.475934 -0.845218 0.243093 
0.844097 -0.363499 -0.394169 
0.353891 -0.865212 0.355203 
0.845144 -0.326499 -0.423238 
0.84013 -0.401101 -0.365102 
0.831713 -0.468714 -0.297591 
0.535718 -0.824114 0.183961 
0.670939 -0.741323 0.0167685 
0.706454 -0.707148 -0.0294046 
0.759364 -0.638381 -0.125841 
0.737209 -0.670458 -0.0837192 
0.84121 -0.238433 -0.485299 
0.600015 -0.791611 0.115471 
0.802291 -0.552792 -0.225277 
0.837183 -0.435616 -0.3307 
0.812128 -0.527275 -0.249859 
0.769832 -0.622323 -0.141678 
0.786952 -0.587862 -0.187415 
0.64082 -0.765433 0.0588338 
0.295812 -0.865901 0.403374 
0.712407 -0.700557 -0.0411825 
0.403744 -0.859789 0.312656 
0.442014 -0.852407 0.279332 
0.347407 -0.866372 0.358759 
0.846317 -0.30847 -0.434275 
0.686239 -0.727375 0.00128651 
0.550087 -0.817529 0.170443 
0.367076 -0.865421 0.341031 
0.483066 -0.84208 0.239893 
0.821695 -0.502696 -0.268539 
0.607968 -0.787668 0.0997694 
0.83083 -0.464708 -0.306215 
0.575457 -0.804553 0.146778 
0.838173 -0.213237 -0.501992 
0.508669 -0.833572 0.215437 
0.30623 -0.866057 0.395181 
0.310481 -0.869655 0.383798 
0.840353 -0.236822 -0.487568 
0.839187 -0.396108 -0.372644 
0.651102 -0.757662 0.0448774 
0.738946 -0.668004 -0.087919 
0.844184 -0.35743 -0.399497 
0.292993 -0.866218 0.404748 
0.719693 -0.692259 -0.0531084 
0.846048 -0.280198 -0.453533 
0.457823 -0.848466 0.265527 
0.772895 -0.615078 -0.155924 
0.408768 -0.859947 0.305614 
0.838968 -0.21943 -0.49798 
0.836594 -0.425018 -0.345645 
0.753936 -0.64681 -0.114963 
0.789206 -0.582742 -0.19382 
0.663964 -0.747101 0.0315129 
0.82217 -0.496878 -0.277756 
0.844961 -0.265875 -0.46406 
0.618753 -0.780548 0.0888285 
0.371968 -0.863999 0.339332 
0.520569 -0.829087 0.204019 
0.831489 -0.45535 -0.31825 
0.480379 -0.841956 0.245654 
0.691632 -0.722104 -0.0144986 
0.582111 -0.80219 0.132807 
0.337754 -0.866033 0.368658 
0.797825 -0.561903 -0.218494 
0.808872 -0.536316 -0.241021 
0.843156 -0.348979 -0.409025 
0.840057 -0.212372 -0.499203 
0.552216 -0.816337 0.169265 
0.325361 -0.863669 0.384988 
0.845088 -0.317942 -0.429812 
0.84142 -0.395292 -0.368451 
0.722024 -0.689136 -0.0614275 
0.627036 -0.775433 0.0743571 
0.421724 -0.857327 0.295195 
0.778494 -0.605998 -0.163445 
0.671148 -0.741066 0.0195452 
0.840931 -0.224353 -0.492444 
0.758952 -0.638342 -0.128496 
0.699328 -0.714342 -0.0255847 
0.825139 -0.4862 -0.287671 
0.454489 -0.849648 0.267467 
0.493006 -0.839049 0.230093 
0.737171 -0.670743 -0.0817458 
0.557534 -0.813913 0.163402 
0.844663 -0.257242 -0.469437 
0.389942 -0.863026 0.321139 
0.811748 -0.527879 -0.249817 
0.643393 -0.763183 0.0599753 
0.836633 -0.422287 -0.348882 
0.846896 -0.29965 -0.439291 
0.589779 -0.798229 0.122437 
0.843543 -0.381595 -0.377916 
0.523605 -0.828026 0.200523 
0.345598 -0.865868 0.36171 
0.785749 -0.590955 -0.182673 
0.839621 -0.214817 -0.498889 
0.424986 -0.856838 0.291916 
0.833458 -0.450203 -0.320414 
0.313955 -0.863654 0.394377 
0.764915 -0.62993 -0.13451 
0.648185 -0.759785 0.0508203 
0.798959 -0.564379 -0.207705 
0.292082 -0.866016 0.405839 
0.815106 -0.520037 -0.255273 
0.741551 -0.664319 -0.0937138 
0.604771 -0.788833 0.109518 
0.844507 -0.3594 -0.397037 
0.703785 -0.709711 -0.0315741 
0.676268 -0.736603 0.00884651 
0.84781 -0.282433 -0.448832 
0.843688 -0.246397 -0.476949 
0.391095 -0.861161 0.324725 
0.461542 -0.846793 0.264424 
0.566004 -0.809714 0.154931 
0.719811 -0.692334 -0.0504572 
0.538089 -0.821305 0.189523 
0.82862 -0.477032 -0.292967 
0.614716 -0.782926 0.0956649 
0.838562 -0.417554 -0.349947 
0.802044 -0.553172 -0.225223 
0.496942 -0.838174 0.224753 
0.356286 -0.862384 0.35966 
0.845504 -0.344411 -0.40805 
0.3082 -0.864802 0.396397 
0.770868 -0.618925 -0.150646 
0.746674 -0.656192 -0.109044 
0.686263 -0.727322 -0.00672969 
0.846673 -0.26843 -0.459445 
0.843753 -0.386404 -0.372521 
0.657362 -0.752569 0.0389305 
0.723922 -0.687095 -0.061947 
0.432311 -0.854402 0.288278 
0.843952 -0.243666 -0.477883 
0.833969 -0.445128 -0.326124 
0.576097 -0.805124 0.141022 
0.847394 -0.314944 -0.427475 
0.316415 -0.863637 0.392445 
0.627927 -0.774092 0.0805511 
0.5083 -0.833499 0.216586 
0.819924 -0.505945 -0.267851 
0.804836 -0.547221 -0.229755 
0.406082 -0.85965 0.309999 
0.839182 -0.212313 -0.500696 
0.780662 -0.601025 -0.171275 
0.53943 -0.821892 0.183055 
0.363509 -0.862648 0.351709 
0.462043 -0.847308 0.261888 
0.590505 -0.797109 0.126183 
0.791863 -0.580099 -0.19089 
0.827501 -0.475023 -0.299323 
0.700588 -0.713316 -0.0188715 
0.843374 -0.379315 -0.380578 
0.752198 -0.649113 -0.113362 
0.663874 -0.747422 0.0251384 
0.725162 -0.685263 -0.0674868 
0.549087 -0.817792 0.172395 
0.835359 -0.435111 -0.335937 
0.845362 -0.346414 -0.406645 
0.631926 -0.771883 0.0697567 
0.512074 -0.832295 0.212286 
0.819336 -0.506463 -0.268673 
0.417147 -0.856225 0.304741 
0.322735 -0.864393 0.385573 
0.708 -0.705479 -0.0321767 
0.84666 -0.313521 -0.429966 
0.439274 -0.851931 0.285048 
0.476484 -0.843109 0.249259 
0.767569 -0.625812 -0.13855 
0.793054 -0.574945 -0.201254 
0.601329 -0.791375 0.110131 
0.846196 -0.245276 -0.473066 
0.808859 -0.536237 -0.24124 
0.678029 -0.734959 0.0105608 
0.830867 -0.45939 -0.31404 
0.844357 -0.214457 -0.490988 
0.367768 -0.86247 0.347694 
0.562543 -0.812095 0.155073 
0.846697 -0.289888 -0.446171 
0.73512 -0.672882 -0.0826331 
0.839704 -0.414037 -0.351383 
0.484905 -0.841734 0.237385 
0.846378 -0.272103 -0.457826 
0.639171 -0.766847 0.0583603 
0.771919 -0.616821 -0.153864 
0.300874 -0.863934 0.403847 
0.521073 -0.828905 0.203471 
0.708222 -0.704742 -0.0419415 
0.610796 -0.785319 0.101007 
0.798923 -0.56164 -0.215131 
0.344378 -0.863117 0.369369 
0.446419 -0.851009 0.276574 
0.845489 -0.345065 -0.407527 
0.749839 -0.652538 -0.109255 
0.844781 -0.225398 -0.485325 
0.843552 -0.388999 -0.37027 
0.823462 -0.485866 -0.292992 
0.576818 -0.804614 0.140988 
0.41391 -0.857139 0.306581 
0.687855 -0.725841 -0.00330208 
0.658765 -0.75123 0.0410147 
0.540301 -0.82106 0.184215 
0.813661 -0.526082 -0.247373 
0.49362 -0.838879 0.229391 
0.833174 -0.447211 -0.325305 
0.305105 -0.864434 0.399582 
0.312307 -0.864819 0.393132 
0.84562 -0.263553 -0.464183 
0.779984 -0.602255 -0.170042 
0.846897 -0.327907 -0.418621 
0.61825 -0.780866 0.0895243 
0.713791 -0.6984 -0.0523452 
0.368431 -0.861955 0.348272 
0.841013 -0.414973 -0.347124 
0.818483 -0.51187 -0.26091 
0.424633 -0.855558 0.296153 
0.845996 -0.242042 -0.475086 
0.729933 -0.67942 -0.0747382 
0.757618 -0.641393 -0.120951 
0.847545 -0.307877 -0.432296 
0.690526 -0.723153 -0.0149854 
0.666665 -0.744852 0.0274525 
0.464662 -0.844834 0.265225 
0.842533 -0.212258 -0.49506 
0.843373 -0.220391 -0.490051 
0.582071 -0.802198 0.132935 
0.802055 -0.555857 -0.218472 
0.843468 -0.37537 -0.384263 
0.548577 -0.817817 0.173892 
0.632572 -0.771002 0.0735396 
0.284469 -0.865749 0.411773 
0.470466 -0.845082 0.253964 
0.335801 -0.86314 0.377132 
0.784206 -0.591905 -0.186199 
0.502198 -0.834882 0.22532 
0.764867 -0.628327 -0.142073 
0.589894 -0.798106 0.122687 
0.389291 -0.862445 0.323484 
0.697592 -0.716036 -0.0256502 
0.430576 -0.85424 0.291338 
0.824074 -0.490627 -0.283174 
0.81955 -0.507417 -0.266207 
0.845717 -0.359269 -0.394573 
0.846163 -0.234459 -0.478579 
0.841772 -0.407148 -0.354472 
0.516451 -0.830862 0.207237 
0.740726 -0.66604 -0.0878398 
0.644206 -0.762682 0.0575763 
0.670671 -0.741569 0.0165929 
0.710335 -0.702378 -0.0457125 
0.84622 -0.264128 -0.462761 
0.849122 -0.297792 -0.436248 
0.833343 -0.457609 -0.310055 
0.557 -0.814713 0.161223 
0.802295 -0.555254 -0.219126 
0.847062 -0.337183 -0.410844 
0.302106 -0.863913 0.402972 
0.842779 -0.214826 -0.493532 
0.606811 -0.787801 0.105595 
0.749506 -0.653983 -0.1027 
0.845119 -0.231472 -0.481866 
0.355217 -0.865471 0.353242 
0.721959 -0.689182 -0.061677 
0.286348 -0.865602 0.410777 
0.476232 -0.843301 0.249093 
0.78633 -0.589432 -0.18508 
0.404311 -0.85971 0.312139 
0.45026 -0.849167 0.276011 
0.652158 -0.756765 0.0446829 
0.82697 -0.480278 -0.292325 
0.842085 -0.3903 -0.372235 
0.769045 -0.620782 -0.15231 
0.564507 -0.811024 0.15353 
0.673805 -0.73876 0.0148451 
0.520324 -0.829916 0.201253 
0.805127 -0.545659 -0.232436 
0.695973 -0.717911 -0.0150354 
0.839793 -0.204712 -0.502833 
0.84744 -0.329715 -0.416093 
0.295613 -0.864367 0.406795 
0.618643 -0.780233 0.0922915 
0.845175 -0.259757 -0.467125 
0.833547 -0.452138 -0.317444 
0.425973 -0.854542 0.297161 
0.845432 -0.374904 -0.380385 
0.573897 -0.806885 0.139927 
0.49233 -0.838568 0.233269 
0.847831 -0.314337 -0.427054 
0.815216 -0.520662 -0.253641 
0.75114 -0.649526 -0.117915 
0.788146 -0.584746 -0.192088 
0.835347 -0.436118 -0.334659 
0.305274 -0.863923 0.400555 
0.730991 -0.67842 -0.0734725 
0.773825 -0.612409 -0.161711 
0.841408 -0.215161 -0.49572 
0.358487 -0.864197 0.353059 
0.631218 -0.771766 0.0770775 
0.844624 -0.226406 -0.485129 
0.536072 -0.824061 0.183167 
0.654555 -0.755255 0.0338603 
0.701137 -0.712645 -0.0233281 
0.445827 -0.851444 0.276189 
0.590899 -0.797563 0.121374 
0.823773 -0.489536 -0.285924 
0.84681 -0.238066 -0.475645 
0.848119 -0.294472 -0.440432 
0.293082 -0.864318 0.408726 
0.336942 -0.864556 0.372844 
0.805396 -0.547212 -0.227808 
0.840042 -0.417102 -0.346923 
0.675668 -0.737064 0.0144621 
0.461391 -0.847377 0.262813 
0.401256 -0.859444 0.31678 
0.710174 -0.70298 -0.0383624 
0.819473 -0.50999 -0.261484 
0.793169 -0.573778 -0.204112 
0.84026 -0.206583 -0.501285 
0.496785 -0.837607 0.227198 
0.734936 -0.672914 -0.0839986 
0.756416 -0.642656 -0.12177 
0.545247 -0.81971 0.175447 
0.846703 -0.372361 -0.380056 
0.632023 -0.771839 0.0693605 
0.429287 -0.853646 0.294959 
0.842108 -0.22098 -0.491956 
0.600876 -0.792214 0.106509 
0.847167 -0.343447 -0.405403 
0.508823 -0.833951 0.2136 
0.845464 -0.232732 -0.480653 
0.774461 -0.61238 -0.158748 
0.832735 -0.456383 -0.313475 
0.567776 -0.809344 0.150311 
0.654091 -0.755236 0.0422286 
0.302367 -0.867021 0.396042 
0.679846 -0.733337 0.00502777 
0.84797 -0.329701 -0.415024 
0.80978 -0.534499 -0.242005 
0.354463 -0.864168 0.35717 
0.840304 -0.206483 -0.501252 
0.83906 -0.412197 -0.355066 
0.714997 -0.697271 -0.0509298 
0.463882 -0.847483 0.258042 
0.847695 -0.291778 -0.443033 
0.761228 -0.633819 -0.137132 
0.525194 -0.826702 0.201829 
0.690901 -0.722874 -0.0104006 
0.636245 -0.768786 0.0644979 
0.78236 -0.597583 -0.175519 
0.820185 -0.510568 -0.258103 
0.429099 -0.853238 0.29641 
0.396643 -0.859701 0.321851 
0.607063 -0.788159 0.101388 
0.842762 -0.233507 -0.485002 
0.732317 -0.676363 -0.0790268 
0.577418 -0.804537 0.138957 
0.846133 -0.278789 -0.454242 
0.798303 -0.566257 -0.205099 
0.835833 -0.446562 -0.319322 
0.444583 -0.850721 0.280394 
0.698588 -0.715272 -0.0189967 
0.660013 -0.750295 0.0379489 
0.332581 -0.866396 0.37249 
0.748215 -0.654446 -0.108975 
0.843122 -0.382326 -0.378115 
0.537968 -0.822453 0.184828 
0.720048 -0.69091 -0.0646021 
0.295946 -0.864762 0.405713 
0.848452 -0.319808 -0.421726 
0.469107 -0.844637 0.25793 
0.839921 -0.414617 -0.350179 
0.30025 -0.867093 0.397491 
0.844346 -0.252515 -0.472563 
0.486771 -0.840549 0.237763 
0.823895 -0.493428 -0.278793 
0.360658 -0.863993 0.351342 
0.612651 -0.784816 0.0933942 
0.845266 -0.369954 -0.385564 
0.550396 -0.818358 0.165393 
0.639571 -0.766544 0.057964 
0.808482 -0.54062 -0.232565 
0.783148 -0.597512 -0.172217 
0.389722 -0.85958 0.330515 
0.764322 -0.630384 -0.135749 
0.800438 -0.561403 -0.21006 
0.581039 -0.802982 0.132718 
0.67031 -0.741807 0.0201659 
0.495516 -0.838629 0.226199 
0.700908 -0.712596 -0.0305833 
0.839447 -0.212509 -0.500168 
0.828228 -0.477404 -0.293468 
0.733164 -0.675545 -0.0781639 
0.835863 -0.444217 -0.322497 
0.840855 -0.225517 -0.492042 
0.843454 -0.239751 -0.480733 
0.846984 -0.316064 -0.427459 
0.813102 -0.527856 -0.245427 
0.428575 -0.854173 0.294468 
0.74965 -0.652861 -0.108616 
0.676189 -0.7367 0.00650216 
0.410679 -0.85764 0.30951 
0.846641 -0.361476 -0.390557 
0.292464 -0.866809 0.403865 
0.619316 -0.78074 0.0830169 
0.841488 -0.217837 -0.494414 
0.369855 -0.86161 0.347615 
0.59004 -0.798387 0.120129 
0.841244 -0.405033 -0.358129 
0.29257 -0.865178 0.407271 
0.508735 -0.834419 0.211974 
0.786019 -0.59073 -0.182241 
0.645723 -0.761723 0.0531094 
0.556253 -0.814772 0.163492 
0.766812 -0.626599 -0.139186 
0.71303 -0.699548 -0.047122 
0.837709 -0.429323 -0.337529 
0.521377 -0.830259 0.197071 
0.844972 -0.310001 -0.435799 
0.45096 -0.850569 0.270496 
0.797078 -0.567352 -0.206826 
0.844708 -0.275046 -0.45915 
0.468779 -0.846625 0.251937 
0.818777 -0.515311 -0.2531 
0.83076 -0.470542 -0.297368 
0.68217 -0.731187 -0.00313088 
0.377514 -0.861214 0.340285 
0.841271 -0.242996 -0.482924 
0.624509 -0.776893 0.0801601 
0.839492 -0.221408 -0.496217 
0.647181 -0.760967 0.0456744 
0.754333 -0.646603 -0.11352 
0.842823 -0.22153 -0.490483 
0.787937 -0.589502 -0.177884 
0.846645 -0.357325 -0.39435 
0.692126 -0.721586 -0.0166215 
0.593576 -0.795903 0.119191 
0.563406 -0.812271 0.150963 
0.842176 -0.400193 -0.361365 
0.803502 -0.552704 -0.22114 
0.724539 -0.686108 -0.0655746 
0.416753 -0.856114 0.305592 
0.477622 -0.844781 0.241292 
0.847909 -0.341892 -0.405166 
0.844417 -0.265206 -0.465431 
0.764564 -0.630066 -0.135864 
0.52294 -0.828853 0.198839 
0.713933 -0.698521 -0.0486614 
0.82107 -0.505432 -0.265298 
0.839594 -0.418322 -0.346539 
0.659457 -0.751123 0.0305008 
0.83392 -0.45922 -0.306094 
0.339466 -0.864008 0.371823 
0.369485 -0.864418 0.340973 
0.775436 -0.611713 -0.156546 
0.839337 -0.215152 -0.499222 
0.491509 -0.84005 0.22964 
0.625555 -0.77647 0.0759981 
0.441025 -0.852079 0.281882 
0.847119 -0.313223 -0.42928 
0.413833 -0.859322 0.300512 
0.73509 -0.672967 -0.0822083 
0.789801 -0.586349 -0.180025 
0.59846 -0.793355 0.111511 
0.748759 -0.653832 -0.108923 
0.80636 -0.545652 -0.22814 
0.563429 -0.811903 0.152845 
0.671713 -0.740665 0.0147247 
0.355332 -0.863462 0.358013 
0.531136 -0.826331 0.187274 
0.841376 -0.395489 -0.368342 
0.837694 -0.210353 -0.504004 
0.825391 -0.488122 -0.283667 
0.638501 -0.767273 0.0600666 
0.845699 -0.373519 -0.381151 
0.684108 -0.729379 -0.00111308 
0.841379 -0.414174 -0.347189 
0.84287 -0.235342 -0.483925 
0.847172 -0.304997 -0.435059 
0.846243 -0.34902 -0.402564 
0.830727 -0.457249 -0.317515 
0.44966 -0.850459 0.272993 
0.571812 -0.80779 0.143197 
0.49801 -0.837443 0.225113 
0.709505 -0.703735 -0.0368767 
0.792579 -0.577432 -0.195938 
0.846499 -0.26821 -0.459894 
0.313195 -0.866652 0.388359 
0.386293 -0.863388 0.32456 
0.775779 -0.612391 -0.152133 
0.760177 -0.63738 -0.126005 
0.322098 -0.866761 0.38076 
0.837843 -0.217784 -0.500589 
0.808128 -0.544064 -0.225662 
0.600882 -0.79211 0.107253 
0.314291 -0.867333 0.385947 
0.413469 -0.860215 0.298452 
0.644899 -0.762599 0.050478 
0.456769 -0.848981 0.265696 
0.8413 -0.228893 -0.489717 
0.816105 -0.516875 -0.258481 
0.531063 -0.825923 0.189268 
0.846712 -0.328036 -0.418892 
0.504224 -0.834957 0.220467 
0.824958 -0.48518 -0.289903 
0.712847 -0.699659 -0.0482315 
0.606322 -0.78905 0.0988642 
0.730194 -0.67946 -0.0717714 
0.841437 -0.235224 -0.48647 
0.354379 -0.865274 0.354565 
0.778906 -0.606338 -0.160184 
0.837854 -0.22566 -0.497069 
0.685584 -0.727964 -0.00656247 
0.660105 -0.750425 0.0335219 
0.842229 -0.402252 -0.358948 
0.848964 -0.294654 -0.438678 
0.542683 -0.821193 0.176457 
0.790164 -0.584247 -0.185194 
0.334 -0.868289 0.366766 
0.56784 -0.810259 0.145045 
0.847043 -0.267763 -0.459153 
0.837268 -0.432843 -0.334109 
0.386176 -0.862375 0.327379 
0.620023 -0.780096 0.0837977 
0.467151 -0.844281 0.262601 
0.838789 -0.227484 -0.494655 
0.362872 -0.865563 0.345144 
0.844182 -0.39391 -0.363582 
0.425669 -0.856824 0.290961 
0.761562 -0.636801 -0.120449 
0.662574 -0.748628 0.0234941 
0.74245 -0.663581 -0.0918073 
0.805753 -0.54617 -0.229044 
0.832403 -0.461267 -0.307144 
0.694623 -0.719133 -0.0185962 
0.845327 -0.362427 -0.392515 
0.509038 -0.8335 0.214845 
0.816773 -0.515832 -0.258454 
0.848342 -0.333932 -0.41086 
0.713585 -0.699259 -0.0428064 
0.840862 -0.237029 -0.486588 
0.799574 -0.564959 -0.203725 
0.847141 -0.251976 -0.467826 
0.780682 -0.603513 -0.162198 
0.576072 -0.805807 0.137172 
0.636708 -0.768315 0.0655279 
0.398691 -0.861102 0.315513 
0.435364 -0.854166 0.284357 
0.47504 -0.844938 0.245799 
0.823984 -0.492096 -0.280877 
0.593825 -0.796445 0.114222 
0.321706 -0.86811 0.378009 
0.763805 -0.632694 -0.127669 
0.543004 -0.82106 0.17609 
0.51451 -0.833024 0.203348 
0.848819 -0.312456 -0.42647 
0.332815 -0.870265 0.363144 
0.727789 -0.682561 -0.0665809 
0.837946 -0.423125 -0.34469 
0.666873 -0.744799 0.0235511 
0.613723 -0.783996 0.0932403 
0.308664 -0.869149 0.386402 
0.646292 -0.761402 0.0507261 
0.843519 -0.250404 -0.475156 
0.330788 -0.868875 0.368288 
0.73927 -0.667946 -0.0855985 
0.832641 -0.45998 -0.308427 
0.697062 -0.716772 -0.0184998 
0.808009 -0.543755 -0.226829 
0.845139 -0.373422 -0.382487 
0.365585 -0.865593 0.342193 
0.782655 -0.59958 -0.167196 
0.403559 -0.860412 0.311178 
0.472204 -0.845018 0.250934 
0.840257 -0.409047 -0.355877 
0.550668 -0.81783 0.167087 
0.745017 -0.660003 -0.0966718 
0.452724 -0.850165 0.268813 
0.797472 -0.567359 -0.205284 
0.848144 -0.346257 -0.400946 
0.840635 -0.242805 -0.484126 
0.818388 -0.51477 -0.255448 
0.677731 -0.735262 0.0084507 
0.762023 -0.635843 -0.122573 
0.566402 -0.810626 0.148573 
0.823195 -0.492911 -0.28176 
0.84798 -0.306351 -0.432526 
0.42779 -0.855657 0.291284 
0.62022 -0.779848 0.084645 
0.701483 -0.712239 -0.025232 
0.305084 -0.867461 0.392983 
0.843952 -0.276445 -0.4597 
0.839425 -0.239976 -0.487624 
0.585699 -0.800692 0.125897 
0.647581 -0.760544 0.0470209 
0.508413 -0.836235 0.205494 
0.831792 -0.455698 -0.316957 
0.805016 -0.548394 -0.226303 
0.848674 -0.335877 -0.408582 
0.480819 -0.844545 0.235707 
0.717517 -0.694917 -0.0475358 
0.373489 -0.862568 0.341294 
0.452462 -0.851524 0.264924 
0.835196 -0.440722 -0.328956 
0.841941 -0.397392 -0.364986 
0.770438 -0.62154 -0.141824 
0.781622 -0.600529 -0.168616 
0.840484 -0.238937 -0.486308 
0.743707 -0.662369 -0.0903745 
0.402686 -0.857131 0.321201 
0.798397 -0.566291 -0.20464 
0.814386 -0.521171 -0.255258 
0.678841 -0.73425 0.00726319 
0.347349 -0.866029 0.359642 
0.545906 -0.819992 0.172044 
0.839661 -0.243444 -0.485493 
0.625048 -0.77658 0.0789868 
0.597387 -0.794287 0.110618 
0.321346 -0.867806 0.379011 
0.429271 -0.85587 0.288466 
0.823875 -0.487031 -0.28988 
0.731494 -0.67802 -0.0721498 
0.655037 -0.754616 0.0384747 
0.520001 -0.831749 0.194403 
0.841736 -0.258188 -0.474151 
0.846423 -0.317369 -0.427604 
0.697629 -0.716238 -0.0178091 
0.842347 -0.280136 -0.460408 
0.562865 -0.81192 0.15482 
0.756189 -0.644095 -0.115415 
0.839167 -0.4253 -0.338997 
0.842408 -0.391181 -0.370575 
0.477738 -0.844901 0.240641 
0.377497 -0.859638 0.344265 
0.450849 -0.852152 0.265655 
0.845933 -0.372438 -0.381691 
0.802879 -0.556251 -0.214406 
0.398617 -0.85892 0.321497 
0.817283 -0.512104 -0.264192 
0.847457 -0.339218 -0.408347 
0.566148 -0.810844 0.148353 
0.432922 -0.855395 0.284391 
0.830971 -0.467105 -0.30216 
0.604617 -0.789545 0.105155 
0.777381 -0.608921 -0.157775 
0.679691 -0.733383 0.0130324 
0.631421 -0.772281 0.0699313 
0.706676 -0.706865 -0.0308299 
0.840353 -0.240925 -0.485554 
0.769702 -0.621935 -0.144066 
0.656173 -0.753658 0.0378953 
0.791914 -0.581927 -0.185024 
0.344123 -0.865535 0.363906 
0.839034 -0.42479 -0.339965 
0.839777 -0.250706 -0.481582 
0.520343 -0.831701 0.193693 
0.495372 -0.839581 0.222959 
0.312602 -0.867356 0.387263 
0.846206 -0.312259 -0.431776 
0.72955 -0.680328 -0.070074 
0.53541 -0.824346 0.18382 
0.807854 -0.542298 -0.230836 
0.840191 -0.25604 -0.478041 
0.754982 -0.645464 -0.11566 
0.61654 -0.781989 0.0915014 
0.371355 -0.860885 0.34781 
0.825223 -0.488948 -0.28273 
0.832451 -0.453849 -0.317879 
0.3968 -0.862389 0.314381 
0.680894 -0.732356 0.00614386 
0.844138 -0.303604 -0.441877 
0.839782 -0.405628 -0.360877 
0.447318 -0.851086 0.274879 
0.582142 -0.802376 0.131539 
0.738069 -0.669039 -0.087406 
0.631854 -0.772122 0.0677438 
0.847307 -0.346346 -0.402635 
0.542231 -0.821401 0.176879 
0.70859 -0.70467 -0.0366055 
0.79385 -0.575817 -0.195543 
0.42317 -0.856616 0.295189 
0.354045 -0.861626 0.363665 
0.654302 -0.755099 0.0414099 
0.811153 -0.532366 -0.242111 
0.840638 -0.248434 -0.481257 
0.775337 -0.611583 -0.157542 
0.845226 -0.281662 -0.454158 
0.841256 -0.382892 -0.381684 
0.765696 -0.629106 -0.133922 
0.488519 -0.84212 0.228438 
0.693563 -0.720323 -0.0102592 
0.448267 -0.852187 0.269878 
0.61368 -0.784021 0.0933184 
0.337219 -0.864646 0.372385 
0.822721 -0.491152 -0.286183 
0.835712 -0.431324 -0.339919 
0.588368 -0.799203 0.122873 
0.845243 -0.332626 -0.41824 
0.362044 -0.863392 0.351396 
0.841726 -0.262405 -0.471848 
0.831397 -0.460766 -0.310603 
0.501532 -0.837181 0.218161 
0.842868 -0.271377 -0.464681 
0.721076 -0.690699 -0.0546314 
0.796789 -0.567744 -0.206867 
0.744865 -0.660244 -0.0961903 
0.661191 -0.749454 0.0338399 
0.545537 -0.821115 0.167807 
0.817943 -0.51578 -0.254834 
0.780634 -0.603164 -0.163717 
0.634696 -0.769628 0.0695295 
0.399161 -0.861488 0.313861 
0.517597 -0.832017 0.199601 
0.726977 -0.683733 -0.0633456 
0.416084 -0.857743 0.301912 
0.846207 -0.308445 -0.434505 
0.839556 -0.422981 -0.34093 
0.844102 -0.38739 -0.370703 
0.46256 -0.847353 0.260829 
0.698406 -0.71547 -0.0182109 
0.556603 -0.815631 0.157922 
0.61353 -0.783644 0.097383 
0.67523 -0.737332 0.0201419 
0.348599 -0.864539 0.36201 
0.760355 -0.636838 -0.127663 
0.845883 -0.278721 -0.45475 
0.802491 -0.55719 -0.213419 
0.58826 -0.79911 0.123989 
0.36703 -0.864185 0.3442 
0.847335 -0.285716 -0.447649 
0.844015 -0.3629 -0.394895 
0.822779 -0.491944 -0.28465 
0.752254 -0.650287 -0.106018 
0.638979 -0.766359 0.0663291 
0.831279 -0.46044 -0.3114 
0.786112 -0.592507 -0.175965 
0.474048 -0.845045 0.247339 
0.434086 -0.85448 0.285366 
0.840237 -0.414253 -0.349851 
0.843403 -0.272571 -0.463008 
0.705467 -0.708238 -0.0267428 
0.816265 -0.514732 -0.262225 
0.84312 -0.268689 -0.465785 
0.520579 -0.829496 0.202322 
0.729556 -0.680494 -0.0683742 
0.387386 -0.862338 0.326044 
0.680124 -0.732975 0.0134138 
0.809676 -0.537986 -0.23451 
0.763912 -0.63111 -0.134678 
0.564485 -0.810905 0.154241 
0.488847 -0.840786 0.232612 
0.643636 -0.763033 0.0592667 
0.844479 -0.34976 -0.405615 
0.840461 -0.395536 -0.370375 
0.707775 -0.705552 -0.0353762 
0.791199 -0.583772 -0.182249 
0.617061 -0.781678 0.0906386 
0.326647 -0.867348 0.375512 
0.355845 -0.866558 0.349929 
0.589648 -0.798766 0.119536 
0.528124 -0.827478 0.190694 
0.847102 -0.332924 -0.414223 
0.833415 -0.45007 -0.320713 
0.843365 -0.285191 -0.455412 
0.74928 -0.655146 -0.0967676 
0.685877 -0.727718 0.00034289 
0.341107 -0.867853 0.361216 
0.657893 -0.75175 0.045257 
0.769491 -0.621849 -0.145561 
0.403541 -0.859482 0.31376 
0.442976 -0.853444 0.274599 
0.818485 -0.509291 -0.265905 
0.731393 -0.677969 -0.073636 
0.57017 -0.808501 0.145712 
0.844468 -0.280967 -0.455996 
0.797852 -0.570607 -0.194524 
0.842239 -0.380438 -0.38197 
0.320489 -0.867064 0.381427 
0.489937 -0.839848 0.233701 
0.846155 -0.319918 -0.426233 
0.628632 -0.773462 0.0811028 
0.414822 -0.858907 0.300334 
0.845027 -0.278102 -0.456715 
0.809901 -0.537224 -0.235479 
0.837376 -0.42844 -0.339471 
0.822367 -0.497826 -0.275468 
0.715449 -0.69719 -0.0453704 
0.369917 -0.863452 0.342946 
0.536321 -0.82465 0.179758 
0.691048 -0.722778 -0.0067372 
0.748484 -0.65504 -0.10341 
0.33915 -0.866238 0.366891 
0.774349 -0.614987 -0.148909 
0.59325 -0.796146 0.119191 
0.459467 -0.850433 0.256231 
0.843131 -0.360897 -0.398603 
0.664583 -0.746432 0.0341693 
0.844773 -0.288562 -0.450656 
0.82711 -0.476823 -0.297539 
0.313426 -0.86624 0.389091 
0.494391 -0.839423 0.225716 
0.838168 -0.418764 -0.349443 
0.339949 -0.869429 0.358509 
0.574455 -0.805413 0.145983 
0.845915 -0.313093 -0.431742 
0.829668 -0.461562 -0.314026 
0.797372 -0.568012 -0.203864 
0.72853 -0.6814 -0.0702768 
0.437725 -0.85468 0.27914 
0.781752 -0.600257 -0.168986 
0.806038 -0.54128 -0.239411 
0.375279 -0.863672 0.336507 
0.758037 -0.64054 -0.122831 
0.629697 -0.772944 0.0777137 
0.603112 -0.790153 0.109151 
0.673656 -0.738695 0.0227638 
0.539913 -0.823452 0.174417 
0.717347 -0.695227 -0.0455271 
0.509098 -0.834355 0.211356 
0.694857 -0.719062 -0.0111314 
0.841512 -0.358659 -0.404007 
0.322691 -0.86695 0.379827 
0.845068 -0.295172 -0.445795 
0.403347 -0.860238 0.311933 
0.643386 -0.763133 0.0606732 
0.811188 -0.527929 -0.251526 
0.845576 -0.301479 -0.440581 
0.460008 -0.849617 0.25796 
0.836895 -0.408913 -0.363865 
0.833287 -0.450368 -0.320626 
0.766956 -0.627273 -0.135302 
0.702389 -0.711415 -0.023191 
0.819763 -0.502022 -0.275613 
0.738787 -0.66813 -0.0882961 
0.31753 -0.865508 0.387388 
0.572605 -0.806893 0.145078 
0.346495 -0.868123 0.355392 
0.650516 -0.75772 0.0518624 
0.467177 -0.84825 0.249436 
0.544722 -0.82085 0.171706 
0.781806 -0.601099 -0.165707 
0.598267 -0.792427 0.118895 
0.370362 -0.863737 0.341746 
0.79398 -0.575202 -0.196819 
0.845785 -0.343889 -0.407906 
0.435604 -0.855756 0.279159 
0.822051 -0.491276 -0.287888 
0.84483 -0.287571 -0.451182 
0.835125 -0.433827 -0.338171 
0.509807 -0.834558 0.208831 
0.84088 -0.38342 -0.381983 
0.804346 -0.54733 -0.23121 
0.718033 -0.694056 -0.0521108 
0.668856 -0.743064 0.0220859 
0.326628 -0.866139 0.378309 
0.746279 -0.657824 -0.101659 
0.317251 -0.866219 0.386026 
0.611178 -0.78531 0.0987439 
0.846155 -0.309707 -0.433708 
0.402665 -0.862066 0.307738 
0.574581 -0.805265 0.146305 
0.47827 -0.845692 0.236775 
0.847073 -0.327021 -0.418957 
0.65536 -0.753984 0.0448502 
0.620953 -0.779357 0.0837804 
0.684564 -0.728947 0.00310764 
0.342159 -0.865114 0.366749 
0.836122 -0.424663 -0.347219 
0.760767 -0.636514 -0.126818 
0.542304 -0.821468 0.176341 
0.51874 -0.830456 0.203103 
0.699783 -0.714122 -0.0182473 
0.809935 -0.531598 -0.247807 
0.436713 -0.855975 0.276746 
0.828888 -0.46907 -0.304826 
0.84363 -0.377119 -0.382191 
0.72829 -0.681946 -0.0673979 
0.314033 -0.865489 0.390273 
0.368279 -0.864186 0.34286 
0.778265 -0.606692 -0.161951 
0.79136 -0.581157 -0.189753 
0.844998 -0.361473 -0.394102 
0.813263 -0.519732 -0.261692 
0.845274 -0.313149 -0.432956 
0.590389 -0.796857 0.128297 
0.817113 -0.504424 -0.279075 
0.416122 -0.85842 0.29993 
0.751393 -0.651144 -0.106866 
0.319256 -0.865118 0.386843 
0.83036 -0.457903 -0.317533 
0.482623 -0.842153 0.240527 
0.551325 -0.817031 0.168822 
0.838721 -0.414679 -0.352972 
0.447769 -0.852833 0.268661 
0.711616 -0.701615 -0.0365935 
0.850184 -0.324585 -0.414526 
0.325435 -0.865999 0.379655 
0.636608 -0.768195 0.067874 
0.796462 -0.567176 -0.209663 
0.659499 -0.750956 0.033563 
0.730078 -0.679341 -0.0740406 
0.594405 -0.794807 0.12233 
0.374353 -0.865136 0.333765 
0.563561 -0.810614 0.159071 
0.75695 -0.64111 -0.12651 
0.509101 -0.833124 0.216149 
0.673417 -0.739117 0.0146852 
0.341105 -0.864292 0.369658 
0.61192 -0.783999 0.1044 
0.846993 -0.325707 -0.420141 
0.805555 -0.543387 -0.236244 
0.833244 -0.447848 -0.324247 
0.690185 -0.723627 -0.00302788 
0.842049 -0.389895 -0.372741 
0.776921 -0.607971 -0.1636 
0.42328 -0.857402 0.29274 
0.819659 -0.500079 -0.279429 
0.352014 -0.865165 0.357176 
0.63798 -0.767287 0.0652028 
0.710322 -0.702498 -0.0440372 
0.811729 -0.528272 -0.249048 
0.843629 -0.318898 -0.431965 
0.841645 -0.383098 -0.380617 
0.485638 -0.841879 0.235362 
0.522193 -0.828163 0.20362 
0.456042 -0.850124 0.263276 
0.84703 -0.33252 -0.414693 
0.7869 -0.589757 -0.181592 
0.738349 -0.668387 -0.0899989 
0.568059 -0.808715 0.152609 
0.392303 -0.863413 0.3172 
0.825905 -0.481775 -0.292872 
0.797237 -0.568782 -0.202241 
0.320312 -0.867129 0.381429 
0.836652 -0.435362 -0.332376 
0.724622 -0.686639 -0.058745 
0.69158 -0.722187 -0.0127537 
0.841471 -0.377418 -0.386629 
0.652497 -0.756304 0.0474404 
0.527519 -0.826139 0.198034 
0.760376 -0.636854 -0.127456 
0.609498 -0.78613 0.102525 
0.4217 -0.856273 0.298271 
0.582566 -0.802107 0.131309 
0.491771 -0.839159 0.232321 
0.743043 -0.661938 -0.0986142 
0.36432 -0.865584 0.343563 
0.336155 -0.866615 0.368753 
0.666128 -0.745496 0.0225592 
0.454272 -0.849498 0.268311 
0.801453 -0.556263 -0.219648 
0.816237 -0.514748 -0.262283 
0.767255 -0.625655 -0.140983 
0.836385 -0.428184 -0.342226 
0.621587 -0.77866 0.0855481 
0.312747 -0.867566 0.386676 
0.670962 -0.741183 0.0213725 
0.840063 -0.409651 -0.35564 
0.391683 -0.862226 0.321172 
0.702669 -0.710945 -0.0285172 
0.8075 -0.541704 -0.233452 
0.829241 -0.468529 -0.304697 
0.536494 -0.82278 0.187635 
0.780566 -0.601076 -0.171537 
0.502634 -0.834196 0.226883 
0.721391 -0.689698 -0.0625497 
0.844832 -0.365955 -0.390303 
0.822963 -0.496275 -0.276483 
0.556082 -0.814281 0.166491 
0.324113 -0.867615 0.377088 
0.842757 -0.392542 -0.368336 
0.425601 -0.8559 0.293768 
0.576576 -0.804712 0.141419 
0.846358 -0.355413 -0.396686 
0.787217 -0.587395 -0.18777 
0.681624 -0.731688 0.00466802 
0.638908 -0.767064 0.0583888 
0.832166 -0.454234 -0.318073 
0.600965 -0.791143 0.113725 
0.749708 -0.652528 -0.1102 
0.506811 -0.833744 0.219117 
0.842389 -0.333024 -0.423646 
0.45479 -0.849647 0.266958 
0.706038 -0.707338 -0.034392 
0.349292 -0.867944 0.353083 
0.737515 -0.670297 -0.0822973 
0.76498 -0.62911 -0.137937 
0.316636 -0.86713 0.384482 
0.430099 -0.854414 0.291533 
0.806222 -0.542253 -0.236577 
0.811656 -0.528701 -0.248375 
0.794836 -0.57263 -0.200825 
0.644478 -0.763133 0.0477146 
0.393513 -0.86041 0.323794 
0.472713 -0.844087 0.2531 
0.617333 -0.781081 0.0938732 
0.825164 -0.490254 -0.280635 
0.307811 -0.867208 0.391411 
0.845891 -0.353959 -0.398976 
0.683213 -0.730219 0.000222852 
0.524936 -0.827758 0.198139 
0.546702 -0.818231 0.177807 
0.770169 -0.619777 -0.150719 
0.718664 -0.69337 -0.0525488 
0.842781 -0.389876 -0.371101 
0.484932 -0.839393 0.245481 
0.660593 -0.750049 0.0323025 
0.835309 -0.438084 -0.332177 
0.837413 -0.420689 -0.348941 
0.831331 -0.459542 -0.312587 
0.566824 -0.81019 0.149343 
0.404822 -0.858065 0.31598 
0.630845 -0.772069 0.077097 
0.738186 -0.667801 -0.0955206 
0.590696 -0.796716 0.127756 
0.437977 -0.852183 0.286286 
0.493907 -0.837908 0.232307 
0.308899 -0.868032 0.388717 
0.779469 -0.603406 -0.168314 
0.697551 -0.716185 -0.0223899 
0.367846 -0.86365 0.344672 
0.726907 -0.683166 -0.0699333 
0.81003 -0.53052 -0.249798 
0.791772 -0.576325 -0.202351 
0.822396 -0.488208 -0.292093 
0.63825 -0.767024 0.0656587 
0.842998 -0.360385 -0.399346 
0.520466 -0.829278 0.203502 
0.801729 -0.554824 -0.222263 
0.751016 -0.650358 -0.114059 
0.384173 -0.860559 0.334438 
0.661655 -0.749344 0.0263824 
0.601473 -0.791457 0.108747 
0.544464 -0.819995 0.176542 
0.328041 -0.869246 0.369865 
0.451257 -0.849665 0.272829 
0.67558 -0.737239 0.0083924 
0.782076 -0.597389 -0.177438 
0.832212 -0.446182 -0.329157 
0.838147 -0.422293 -0.345222 
0.499252 -0.836086 0.227392 
0.81434 -0.519718 -0.258348 
0.829921 -0.466605 -0.305795 
0.845218 -0.379881 -0.375894 
0.701634 -0.712011 -0.0273826 
0.322308 -0.868444 0.376727 
0.759498 -0.637059 -0.131601 
0.842138 -0.360922 -0.400674 
0.558952 -0.812783 0.164183 
0.396422 -0.859937 0.321493 
0.465662 -0.846448 0.258232 
0.585215 -0.800412 0.129861 
0.423769 -0.855238 0.298308 
0.728824 -0.681257 -0.068587 
0.611281 -0.785373 0.0975936 
0.844275 -0.377659 -0.380227 
0.637279 -0.768074 0.0627573 
0.338226 -0.868195 0.363098 
0.711648 -0.701279 -0.0420065 
0.769704 -0.621598 -0.145506 
0.681734 -0.731585 0.00476533 
0.802371 -0.553422 -0.223438 
0.736775 -0.670817 -0.0846564 
0.820492 -0.498324 -0.280118 
0.314832 -0.869438 0.380734 
0.789214 -0.583687 -0.19092 
0.378135 -0.86256 0.336161 
0.507475 -0.835477 0.210826 
0.651768 -0.757263 0.041833 
0.592216 -0.796307 0.123188 
0.833606 -0.445435 -0.326633 
0.836196 -0.42678 -0.344434 
0.428559 -0.855107 0.291771 
0.618921 -0.780377 0.0891518 
0.523448 -0.828574 0.198665 
0.813801 -0.525493 -0.248162 
0.743752 -0.660516 -0.102718 
0.778518 -0.605225 -0.16617 
0.478464 -0.842214 0.248494 
0.3906 -0.85944 0.32984 
0.555562 -0.815603 0.161684 
0.843694 -0.379934 -0.379251 
0.69221 -0.721585 -0.0126312 
0.753762 -0.646681 -0.116818 
0.81973 -0.500196 -0.279009 
0.444454 -0.851407 0.278508 
0.710742 -0.701975 -0.0455689 
0.786962 -0.587611 -0.188161 
0.799646 -0.560492 -0.215443 
0.632565 -0.771176 0.0717574 
0.826511 -0.473436 -0.304529 
0.354536 -0.864993 0.355093 
0.591363 -0.797159 0.121769 
0.657577 -0.752488 0.0367966 
0.475142 -0.844363 0.247571 
0.56897 -0.808455 0.15058 
0.76507 -0.628294 -0.141116 
0.834537 -0.443584 -0.326774 
0.817846 -0.514705 -0.257308 
0.837204 -0.429595 -0.338432 
0.369894 -0.862319 0.34581 
0.726781 -0.683202 -0.0708889 
0.338614 -0.868399 0.36225 
0.6992 -0.714602 -0.0215206 
0.390122 -0.86157 0.32481 
0.524923 -0.827528 0.199132 
0.668981 -0.742899 0.0237785 
0.778699 -0.603362 -0.171996 
0.502071 -0.835591 0.222961 
0.380927 -0.861176 0.336558 
0.607229 -0.788002 0.101616 
0.842703 -0.387957 -0.373284 
0.840246 -0.415498 -0.34835 
0.735831 -0.671368 -0.0884192 
0.633527 -0.77071 0.0681834 
0.804092 -0.549146 -0.227758 
0.843979 -0.397848 -0.359745 
0.843737 -0.381813 -0.377262 
0.565851 -0.810294 0.152432 
0.439453 -0.85208 0.284326 
0.744435 -0.659986 -0.101167 
0.677963 -0.735044 0.00873507 
0.541083 -0.821369 0.180506 
0.408477 -0.857113 0.313854 
0.820552 -0.500799 -0.27549 
0.826827 -0.480252 -0.292771 
0.789731 -0.58431 -0.186832 
0.767214 -0.624546 -0.146031 
0.835029 -0.446295 -0.321788 
0.699332 -0.714282 -0.0271304 
0.464751 -0.846831 0.258618 
0.581225 -0.80254 0.134558 
0.642749 -0.764 0.0563726 
0.35022 -0.864954 0.359445 
0.81538 -0.525248 -0.243453 
0.377933 -0.859686 0.343665 
0.718963 -0.69245 -0.0600393 
0.608228 -0.787137 0.102343 
0.682798 -0.730598 0.00359815 
0.511523 -0.832919 0.211164 
0.542872 -0.820791 0.177744 
0.749524 -0.652793 -0.109885 
0.366124 -0.861829 0.351003 
0.843913 -0.394489 -0.363578 
0.481431 -0.843608 0.237801 
0.792256 -0.577285 -0.197669 
0.766849 -0.625224 -0.145044 
0.844381 -0.390263 -0.367037 
0.411272 -0.858056 0.307563 
0.656398 -0.753397 0.0391697 
0.723889 -0.686705 -0.0664909 
0.62546 -0.7761 0.0804248 
0.364009 -0.862509 0.351535 
0.843187 -0.388214 -0.371922 
0.700314 -0.71331 -0.0273699 
0.802721 -0.555596 -0.216685 
0.842715 -0.416563 -0.341038 
0.582836 -0.802005 0.130728 
0.430634 -0.853344 0.293868 
0.819409 -0.505517 -0.270226 
0.826237 -0.481599 -0.292224 
0.548822 -0.818066 0.171935 
0.732337 -0.676156 -0.0805955 
0.774327 -0.613133 -0.156481 
0.835146 -0.450502 -0.315562 
0.751727 -0.649609 -0.113643 
0.810708 -0.530385 -0.247879 
0.684248 -0.729232 0.00509303 
0.512023 -0.833151 0.209026 
0.842353 -0.386238 -0.375848 
0.449344 -0.850707 0.272739 
0.358793 -0.863079 0.355476 
0.627821 -0.77477 0.0746484 
0.382919 -0.86173 0.332858 
0.474877 -0.844831 0.246481 
0.660415 -0.750335 0.0291649 
0.595102 -0.7958 0.112056 
0.844364 -0.412747 -0.341599 
0.559724 -0.813115 0.159851 
0.706692 -0.706407 -0.0396894 
0.836145 -0.445265 -0.320313 
0.844249 -0.404858 -0.351189 
0.52361 -0.828513 0.198491 
0.78134 -0.600803 -0.168948 
0.757253 -0.640418 -0.128194 
0.637371 -0.768073 0.0618142 
0.398422 -0.85868 0.32238 
0.841895 -0.395122 -0.367547 
0.821178 -0.505853 -0.264157 
0.828982 -0.482077 -0.283532 
0.344582 -0.866069 0.362199 
0.68439 -0.729108 0.00342639 
0.79335 -0.578927 -0.188254 
0.725361 -0.684929 -0.0687228 
0.567428 -0.809682 0.149804 
0.452468 -0.851082 0.266332 
0.413668 -0.857073 0.307092 
0.801457 -0.559026 -0.2125 
0.843303 -0.397922 -0.361245 
0.711245 -0.701342 -0.0474376 
0.524192 -0.828762 0.195897 
0.80983 -0.534343 -0.242185 
0.482334 -0.842178 0.241019 
0.363234 -0.861604 0.354542 
0.742335 -0.663375 -0.0941933 
0.768751 -0.624137 -0.139551 
0.595727 -0.794681 0.116579 
0.65597 -0.753954 0.0354595 
0.837267 -0.446426 -0.315733 
0.842942 -0.394477 -0.365837 
0.611165 -0.785485 0.0974157 
0.369628 -0.862262 0.346236 
0.488903 -0.840006 0.235293 
0.8416 -0.39774 -0.365393 
0.356416 -0.862742 0.358669 
0.539524 -0.821586 0.184147 
0.690954 -0.722754 -0.0144469 
0.775464 -0.612093 -0.154914 
0.831535 -0.468644 -0.298197 
0.750714 -0.651281 -0.110731 
0.637705 -0.767711 0.0628673 
0.427466 -0.855822 0.291276 
0.569107 -0.808721 0.14862 
0.724756 -0.686279 -0.0612359 
0.826285 -0.491198 -0.27564 
0.81636 -0.518124 -0.255155 
0.37673 -0.861877 0.339473 
0.447562 -0.851411 0.273472 
0.84212 -0.408268 -0.352352 
0.36343 -0.862849 0.351298 
0.617936 -0.781167 0.0890667 
0.66096 -0.749797 0.0305994 
0.705108 -0.708197 -0.0357701 
0.498302 -0.83741 0.224587 
0.800635 -0.56009 -0.2128 
0.7898 -0.584227 -0.186803 
0.392582 -0.860179 0.325532 
0.840926 -0.438057 -0.317725 
0.750348 -0.651305 -0.113048 
0.541745 -0.821061 0.179919 
0.580111 -0.803491 0.133693 
0.455384 -0.849276 0.267124 
0.67019 -0.742083 0.0125652 
0.510602 -0.83369 0.210348 
0.72833 -0.681656 -0.0698524 
0.778067 -0.608566 -0.155753 
0.687606 -0.726032 -0.00871121 
0.363795 -0.863759 0.348674 
0.84127 -0.421744 -0.338227 
0.830612 -0.472151 -0.295224 
0.366507 -0.864873 0.343025 
0.470472 -0.846381 0.24959 
0.592236 -0.797093 0.117897 
0.761838 -0.635157 -0.127193 
0.813974 -0.523607 -0.25156 
0.63185 -0.771723 0.0721771 
0.708787 -0.704136 -0.0425777 
0.736107 -0.671526 -0.0848476 
0.548012 -0.818542 0.172255 
0.820243 -0.508116 -0.262714 
0.409016 -0.858181 0.310211 
0.610668 -0.786282 0.0940455 
0.35806 -0.863205 0.355908 
0.800202 -0.563626 -0.204946 
0.482748 -0.841677 0.241938 
0.787816 -0.58823 -0.182568 
0.389839 -0.863431 0.320176 
0.642248 -0.7646 0.0538897 
0.835201 -0.447551 -0.31959 
0.662289 -0.748773 0.0266866 
0.689031 -0.724634 -0.0118781 
0.565917 -0.810295 0.152185 
0.838991 -0.414245 -0.352839 
0.424466 -0.854771 0.298656 
0.839866 -0.40814 -0.357837 
0.742397 -0.66276 -0.0979623 
0.709738 -0.702885 -0.0471655 
0.502086 -0.83644 0.219721 
0.447015 -0.850916 0.275898 
0.366861 -0.864259 0.344193 
0.826891 -0.479393 -0.293996 
0.363474 -0.863149 0.350516 
0.757138 -0.640698 -0.12747 
0.807456 -0.545896 -0.223635 
0.514442 -0.8321 0.207267 
0.574545 -0.807189 0.135444 
0.347947 -0.864096 0.363692 
0.749403 -0.654162 -0.102305 
0.837898 -0.412583 -0.357353 
0.60921 -0.7867 0.0998322 
0.473601 -0.844652 0.249529 
0.667994 -0.744034 0.0140524 
0.81817 -0.514572 -0.256541 
0.719097 -0.692285 -0.0603314 
0.531038 -0.826465 0.186958 
0.771595 -0.619425 -0.144755 
0.453468 -0.850414 0.266762 
0.35315 -0.864363 0.357998 
0.688645 -0.724915 -0.0163243 
0.634543 -0.770117 0.0653882 
0.385335 -0.862629 0.327702 
0.793726 -0.576528 -0.193945 
0.5922 -0.797223 0.117195 
0.782209 -0.601121 -0.163716 
0.824361 -0.485273 -0.291443 
0.804355 -0.550406 -0.223754 
0.546885 -0.819763 0.170019 
0.400031 -0.859803 0.317355 
0.646398 -0.761381 0.0496887 
0.42876 -0.855098 0.291501 
0.477724 -0.844232 0.243007 
0.672516 -0.739988 0.0118279 
0.73072 -0.678727 -0.0733325 
0.699577 -0.714095 -0.0257098 
0.746732 -0.657788 -0.0985201 
0.835108 -0.434236 -0.337688 
0.819229 -0.506552 -0.268829 
0.609587 -0.786745 0.0971354 
0.4973 -0.838497 0.222747 
0.831321 -0.467055 -0.301273 
0.569676 -0.809556 0.141731 
0.399334 -0.86156 0.313444 
0.797543 -0.568116 -0.202902 
0.376564 -0.863039 0.336695 
0.714297 -0.698323 -0.0460952 
0.591119 -0.797606 0.120013 
0.515334 -0.832492 0.203442 
0.835851 -0.420754 -0.352589 
0.431874 -0.855703 0.285057 
0.76297 -0.634959 -0.121257 
0.835898 -0.421162 -0.35199 
0.679156 -0.733954 0.0076808 
0.650647 -0.758298 0.0405349 
0.621515 -0.779 0.0829385 
0.783615 -0.597501 -0.170118 
0.566838 -0.810958 0.145059 
0.521868 -0.830162 0.196178 
0.443797 -0.852411 0.276477 
0.747462 -0.65751 -0.0947684 
0.801068 -0.558701 -0.214809 
0.725931 -0.684589 -0.0660511 
0.402024 -0.858894 0.317297 
0.693146 -0.720658 -0.0141515 
0.808028 -0.541512 -0.232066 
0.767703 -0.62702 -0.132208 
0.350875 -0.865042 0.358593 
0.81934 -0.512542 -0.256872 
0.712888 -0.699858 -0.0446126 
0.389869 -0.860963 0.326718 
0.538799 -0.823986 0.175335 
0.468057 -0.846236 0.254574 
0.376401 -0.86191 0.339755 
0.591077 -0.797221 0.122748 
0.653988 -0.755464 0.0396594 
0.625072 -0.776811 0.076483 
0.83526 -0.42693 -0.346513 
0.489367 -0.840641 0.232041 
0.830661 -0.460615 -0.312789 
0.835271 -0.437837 -0.332598 
0.834313 -0.434562 -0.339231 
0.835606 -0.424911 -0.348157 
0.356123 -0.865353 0.352621 
0.789662 -0.586113 -0.181399 
0.695716 -0.718013 -0.0208948 
0.821688 -0.500268 -0.273059 
0.669111 -0.742875 0.0206781 
0.834586 -0.432259 -0.341493 
0.750363 -0.652974 -0.102858 
0.569227 -0.80882 0.147616 
0.412437 -0.857046 0.308817 
0.603867 -0.790018 0.105904 
0.543811 -0.821303 0.172429 
0.812209 -0.533687 -0.235574 
0.495297 -0.839672 0.22278 
0.737089 -0.671746 -0.0738768 
0.434864 -0.855621 0.280723 
0.392867 -0.861843 0.320754 
0.765606 -0.629947 -0.130437 
0.797027 -0.568278 -0.204471 
0.625941 -0.776419 0.0732911 
0.673934 -0.738623 0.0157418 
0.70271 -0.710832 -0.0302708 
0.459971 -0.849839 0.257294 
0.810246 -0.531947 -0.246035 
0.6071 -0.788455 0.098841 
0.644069 -0.763026 0.0544655 
0.516715 -0.832565 0.199602 
0.786665 -0.589607 -0.183089 
0.395993 -0.862356 0.315487 
0.473838 -0.84507 0.247658 
0.833125 -0.434656 -0.34202 
0.826178 -0.48278 -0.290435 
0.714729 -0.698188 -0.0411936 
0.57389 -0.807176 0.138264 
0.541558 -0.822603 0.173318 
0.412199 -0.858814 0.304188 
0.371029 -0.863149 0.342507 
0.831216 -0.460736 -0.311132 
0.748138 -0.65668 -0.09519 
0.733385 -0.675829 -0.0734972 
0.832725 -0.439488 -0.336777 
0.681684 -0.731637 0.00372137 
0.830661 -0.442512 -0.337914 
0.774949 -0.611907 -0.158189 
0.799079 -0.56177 -0.214213 
0.549737 -0.818295 0.167878 
0.484861 -0.842879 0.233378 
0.375257 -0.863806 0.336187 
0.815172 -0.519419 -0.25632 
0.620703 -0.779746 0.0819986 
0.427758 -0.856412 0.289106 
0.45561 -0.85031 0.263425 
0.653824 -0.755309 0.0449754 
0.513434 -0.834059 0.20182 
0.789718 -0.586416 -0.180173 
0.759051 -0.64022 -0.118156 
0.709148 -0.704225 -0.0342917 
0.574981 -0.806912 0.135241 
0.355221 -0.866903 0.34971 
0.83233 -0.450244 -0.323276 
0.389342 -0.86216 0.324181 
0.593012 -0.79687 0.115476 
0.808713 -0.539679 -0.233944 
0.635706 -0.769031 0.0668485 
0.818652 -0.510999 -0.262088 
0.684815 -0.728709 0.00341499 
0.66256 -0.748357 0.0312384 
0.774684 -0.612703 -0.156398 
0.82881 -0.472957 -0.298973 
0.522891 -0.830427 0.192291 
0.399083 -0.862656 0.310736 
0.551508 -0.818753 0.159631 
0.726729 -0.683989 -0.0634345 
0.485936 -0.842504 0.232495 
0.80152 -0.556986 -0.217561 
0.711845 -0.701211 -0.0397411 
0.457499 -0.851846 0.255054 
0.687928 -0.72574 -0.00747452 
0.374663 -0.865054 0.33363 
0.831615 -0.450481 -0.324782 
0.643125 -0.763559 0.0580297 
0.757695 -0.641393 -0.120471 
0.59524 -0.795994 0.109921 
0.426783 -0.856246 0.291032 
0.808074 -0.537568 -0.24091 
0.78445 -0.591792 -0.185528 
0.386558 -0.863195 0.324757 
0.491286 -0.842191 0.222154 
0.560072 -0.814758 0.149964 
0.74624 -0.658648 -0.0964786 
0.582274 -0.802225 0.131879 
0.801035 -0.557957 -0.216857 
0.774647 -0.613531 -0.153303 
0.623187 -0.77767 0.0828726 
0.828291 -0.456367 -0.325058 
0.531068 -0.827117 0.183967 
0.831882 -0.4658 -0.301666 
0.696967 -0.716927 -0.0159029 
0.666455 -0.744924 0.030425 
0.722345 -0.689239 -0.056273 
0.707332 -0.706203 -0.0309593 
0.450341 -0.851615 0.268225 
0.823312 -0.496964 -0.274197 
0.471663 -0.847896 0.242088 
0.504742 -0.836265 0.214234 
0.404084 -0.861851 0.306479 
0.378577 -0.862966 0.334616 
0.371016 -0.864175 0.339925 
0.603409 -0.790053 0.108233 
0.63668 -0.768705 0.0610744 
0.434652 -0.853281 0.288078 
0.757639 -0.640876 -0.123539 
0.787109 -0.588544 -0.184595 
0.388786 -0.862609 0.323653 
0.532374 -0.826143 0.184569 
0.740775 -0.665773 -0.0894336 
0.582743 -0.801489 0.134263 
0.728303 -0.682158 -0.0650731 
0.548802 -0.817648 0.173978 
0.67624 -0.736507 0.0160225 
0.826384 -0.469879 -0.310328 
0.813218 -0.525271 -0.250533 
0.614505 -0.783382 0.0932505 
0.480338 -0.842884 0.242532 
0.644953 -0.761874 0.0598533 
0.370107 -0.864321 0.340545 
0.690035 -0.723754 -0.00569886 
0.794476 -0.572563 -0.202433 
0.826082 -0.466023 -0.316875 
0.503554 -0.836761 0.21509 
0.824596 -0.485986 -0.289584 
0.773488 -0.615706 -0.150404 
0.39875 -0.861015 0.315677 
0.707445 -0.706331 -0.0248523 
0.438293 -0.855075 0.27703 
0.421047 -0.854476 0.304288 
0.759641 -0.637837 -0.126921 
0.585387 -0.800511 0.128468 
0.658502 -0.751577 0.0388147 
0.741617 -0.664208 -0.0939801 
0.556909 -0.813995 0.165121 
0.48682 -0.841151 0.235524 
0.797953 -0.565179 -0.209387 
0.620255 -0.779162 0.0904988 
0.785576 -0.592014 -0.179972 
0.671533 -0.74058 0.0241982 
0.521266 -0.830672 0.195618 
0.715117 -0.698173 -0.0340915 
0.815451 -0.521104 -0.251972 
0.562364 -0.811532 0.158627 
0.44705 -0.851884 0.272837 
0.803097 -0.554907 -0.217056 
0.719292 -0.693217 -0.0455019 
0.823209 -0.475854 -0.30966 
0.383357 -0.863397 0.327997 
0.595833 -0.794321 0.118474 
0.82074 -0.492378 -0.289739 
0.493871 -0.839659 0.225975 
0.677299 -0.735539 0.0157535 
0.399727 -0.85996 0.317313 
0.409623 -0.859335 0.306189 
0.636765 -0.767729 0.0715778 
0.746576 -0.65788 -0.0990881 
0.766631 -0.626126 -0.142281 
0.813913 -0.518755 -0.261608 
0.695423 -0.71859 -0.00401668 
0.753408 -0.647613 -0.113905 
0.729003 -0.681118 -0.0680566 
0.518682 -0.830962 0.201174 
0.569504 -0.807781 0.152169 
0.779322 -0.603849 -0.167402 
0.544603 -0.819103 0.180213 
0.463907 -0.847716 0.257232 
0.65793 -0.751763 0.0445025 
0.598548 -0.791723 0.122132 
0.634659 -0.769462 0.0716648 
0.374891 -0.863202 0.338141 
0.435357 -0.854069 0.284657 
0.699574 -0.714366 -0.0166833 
0.490983 -0.840156 0.230376 
0.809339 -0.535147 -0.242051 
0.801815 -0.558812 -0.211712 
0.820344 -0.495078 -0.286242 
0.816235 -0.51206 -0.267496 
0.578499 -0.803452 0.140724 
0.408026 -0.860047 0.306322 
0.712104 -0.701025 -0.0383576 
0.660018 -0.750184 0.0399918 
0.785877 -0.591406 -0.180656 
0.610644 -0.78473 0.106365 
0.731216 -0.678792 -0.0675608 
0.747012 -0.656579 -0.104291 
0.674596 -0.73784 0.0226468 
0.45482 -0.850419 0.264437 
0.516233 -0.831107 0.206795 
0.371572 -0.865893 0.33491 
0.7605 -0.636543 -0.128266 
0.429048 -0.855312 0.290446 
0.624474 -0.776263 0.0862968 
0.525322 -0.827845 0.196748 
0.802271 -0.558979 -0.209531 
0.585334 -0.799067 0.137387 
0.680765 -0.732482 0.00543161 
0.710952 -0.702211 -0.0380357 
0.816364 -0.5076 -0.275487 
0.481441 -0.842963 0.240056 
0.791416 -0.580216 -0.192382 
0.767348 -0.626392 -0.137154 
0.552567 -0.816143 0.169056 
0.389522 -0.864003 0.319018 
0.631738 -0.771454 0.0759302 
0.810262 -0.534133 -0.2412 
0.413053 -0.859628 0.300709 
0.68999 -0.723789 -0.00649607 
0.814076 -0.517972 -0.262651 
0.653347 -0.755257 0.0521944 
0.445958 -0.853364 0.269982 
0.739827 -0.667332 -0.0855768 
0.73235 -0.677043 -0.0726387 
0.377772 -0.864219 0.332286 
0.778116 -0.60843 -0.156036 
0.585897 -0.799479 0.132507 
0.437081 -0.85408 0.281971 
0.489015 -0.839513 0.236819 
0.664809 -0.746472 0.0284325 
0.749322 -0.653477 -0.107159 
0.389548 -0.863032 0.321602 
0.803373 -0.550232 -0.227677 
0.521686 -0.829353 0.200043 
0.706157 -0.707457 -0.0291116 
0.555726 -0.815037 0.163961 
0.797227 -0.565292 -0.211836 
0.812874 -0.523537 -0.255235 
0.60298 -0.78989 0.111751 
0.761486 -0.635518 -0.127498 
0.388653 -0.863703 0.320885 
0.628253 -0.773631 0.0824195 
0.456713 -0.849605 0.263789 
0.399164 -0.863224 0.30905 
0.665776 -0.745572 0.0294079 
0.811018 -0.532687 -0.241856 
0.373879 -0.864893 0.334924 
0.812047 -0.526692 -0.251347 
0.724511 -0.686219 -0.0647063 
0.564917 -0.810121 0.156758 
0.685777 -0.727802 -0.00381166 
0.782669 -0.598648 -0.170441 
0.523638 -0.827694 0.201806 
0.386741 -0.862974 0.325125 
0.764153 -0.631274 -0.132527 
0.582373 -0.801309 0.136917 
0.639706 -0.765886 0.0647657 
0.730715 -0.67886 -0.0721489 
0.419438 -0.859113 0.293251 
0.704481 -0.709305 -0.0243422 
0.378639 -0.863998 0.331873 
0.810956 -0.533906 -0.239362 
0.497257 -0.837198 0.227675 
0.463931 -0.847153 0.259037 
0.74624 -0.657385 -0.10474 
0.596266 -0.794051 0.118113 
0.786251 -0.590179 -0.183025 
0.537574 -0.822496 0.185782 
0.391086 -0.863679 0.317978 
0.39446 -0.864315 0.312027 
0.433359 -0.854591 0.286137 
0.688807 -0.724941 -0.00237325 
0.706242 -0.70724 -0.0321715 
0.769638 -0.623606 -0.137014 
0.612396 -0.784172 0.100224 
0.798713 -0.561619 -0.215968 
0.810922 -0.533696 -0.239945 
0.640827 -0.764963 0.0646029 
0.551828 -0.816543 0.169541 
0.384604 -0.863329 0.326716 
0.497848 -0.838272 0.222366 
0.809065 -0.532925 -0.247799 
0.808961 -0.5329 -0.248195 
0.382938 -0.863493 0.328235 
0.712878 -0.699545 -0.0494262 
0.727464 -0.682565 -0.0699991 
0.652918 -0.756315 0.0410613 
0.741485 -0.664858 -0.0903555 
0.77395 -0.614105 -0.154522 
0.459584 -0.847092 0.266867 
0.575483 -0.804596 0.146439 
0.509981 -0.833004 0.21453 
0.405463 -0.860513 0.30841 
0.53163 -0.823552 0.197815 
0.797574 -0.566302 -0.207793 
0.687519 -0.726166 0.00109791 
0.552629 -0.815825 0.170382 
0.585983 -0.7993 0.133205 
0.389482 -0.863506 0.320408 
0.438305 -0.852031 0.286238 
0.605092 -0.788206 0.112226 
0.661856 -0.74896 0.0317288 
0.633653 -0.770169 0.0729604 
0.693627 -0.720177 -0.0150831 
0.753217 -0.64804 -0.112735 
0.380694 -0.863877 0.329832 
0.785367 -0.591097 -0.183854 
0.4852 -0.839933 0.243091 
0.8086 -0.535068 -0.244679 
0.406599 -0.85922 0.310512 
0.452336 -0.848101 0.275893 
0.736659 -0.670396 -0.0888929 
0.72169 -0.689397 -0.0624174 
0.805487 -0.542972 -0.23743 
0.613117 -0.783308 0.102549 
0.533303 -0.823364 0.19406 
0.501879 -0.834038 0.229125 
0.550506 -0.816332 0.174771 
0.442182 -0.850383 0.285173 
0.806234 -0.545626 -0.228646 
0.760878 -0.634902 -0.13403 
0.803427 -0.557715 -0.208467 
0.374366 -0.864209 0.336144 
0.644655 -0.762411 0.0561221 
0.659817 -0.750812 0.0303803 
0.804125 -0.551904 -0.220872 
0.690576 -0.723231 -0.00646236 
0.581271 -0.802116 0.136869 
0.419362 -0.855174 0.304652 
0.571488 -0.805951 0.15442 
0.39036 -0.861003 0.326026 
0.677397 -0.7355 0.0131848 
0.784649 -0.59154 -0.18549 
0.767726 -0.624048 -0.14547 
0.619573 -0.779365 0.0933719 
0.738604 -0.668119 -0.0898963 
0.534933 -0.822914 0.191465 
0.470597 -0.842697 0.261534 
0.4388 -0.851025 0.288462 
0.706806 -0.706229 -0.0408195 
0.723049 -0.68832 -0.058444 
0.498588 -0.836031 0.229046 
0.785564 -0.590226 -0.185804 
0.801709 -0.558724 -0.212345 
0.696093 -0.717824 -0.0135496 
0.628548 -0.773734 0.0791403 
0.801029 -0.555552 -0.222968 
0.427794 -0.852547 0.300258 
0.53623 -0.823388 0.185712 
0.650962 -0.757518 0.0491447 
0.38949 -0.861039 0.326969 
0.557434 -0.81322 0.167155 
0.811138 -0.535326 -0.235543 
0.674704 -0.737913 0.0160805 
0.808024 -0.540944 -0.233404 
0.734444 -0.674281 -0.0770519 
0.576516 -0.804435 0.143226 
0.800322 -0.5604 -0.213159 
0.59094 -0.797835 0.119372 
0.443355 -0.850833 0.281991 
0.470774 -0.84276 0.261013 
0.755119 -0.644454 -0.120307 
0.700833 -0.712695 -0.0299791 
0.495823 -0.836535 0.233172 
0.712 -0.700875 -0.0427883 
0.778434 -0.605055 -0.167181 
0.771164 -0.618188 -0.152149 
0.682427 -0.730922 0.00680473 
0.425736 -0.854384 0.297955 
0.625747 -0.775699 0.0820445 
0.738654 -0.668147 -0.0892753 
0.505518 -0.836635 0.210936 
0.789436 -0.584292 -0.188134 
0.465233 -0.844399 0.26561 
0.635334 -0.769034 0.0702648 
0.723462 -0.687682 -0.0608023 
0.565791 -0.810292 0.152669 
0.599406 -0.792539 0.112227 
0.658435 -0.751946 0.0322474 
0.754414 -0.646373 -0.114288 
0.439154 -0.851017 0.287946 
0.805646 -0.546602 -0.228387 
0.687503 -0.726143 -0.00747052 
0.520038 -0.829914 0.201997 
0.792954 -0.572835 -0.20757 
0.573896 -0.806069 0.144559 
0.395182 -0.861671 0.31836 
0.477174 -0.844272 0.243945 
0.770933 -0.6186 -0.151644 
0.741918 -0.66379 -0.0945536 
0.437512 -0.854073 0.281321 
0.699374 -0.714467 -0.0203221 
0.670022 -0.742123 0.0179783 
0.75888 -0.638516 -0.128056 
0.807718 -0.54539 -0.223924 
0.606317 -0.788674 0.101854 
0.418608 -0.855723 0.304146 
0.528596 -0.827075 0.191136 
0.716041 -0.696128 -0.0518772 
0.48354 -0.843234 0.234832 
0.638085 -0.767612 0.060167 
0.579599 -0.803838 0.133831 
0.54618 -0.818954 0.176072 
0.44891 -0.85026 0.274841 
0.422498 -0.855807 0.29848 
0.67129 -0.741109 0.0113039 
0.61727 -0.781652 0.0894338 
0.742119 -0.663618 -0.0941823 
0.755869 -0.642958 -0.123563 
0.4076 -0.857791 0.313141 
0.499594 -0.83727 0.222224 
0.698064 -0.71577 -0.0195112 
0.746306 -0.657319 -0.104685 
0.414667 -0.857188 0.305417 
0.555874 -0.815495 0.161162 
0.515286 -0.831957 0.205736 
0.721929 -0.689603 -0.0571403 
0.456044 -0.848885 0.267244 
0.581257 -0.802848 0.132574 
0.761757 -0.634295 -0.131894 
0.644647 -0.762623 0.0532673 
0.438371 -0.854526 0.278598 
0.618611 -0.781255 0.083434 
0.421117 -0.857269 0.296225 
0.763499 -0.631428 -0.135529 
0.597271 -0.794468 0.109943 
0.660841 -0.749862 0.0315621 
0.526596 -0.826171 0.200348 
0.472969 -0.844468 0.251345 
0.41567 -0.857996 0.301764 
0.553406 -0.817141 0.161314 
0.404526 -0.858711 0.314601 
0.802057 -0.56198 -0.202198 
0.780936 -0.599791 -0.174327 
0.697455 -0.716285 -0.0221857 
0.802785 -0.55609 -0.215176 
0.682809 -0.73057 0.00627002 
0.490298 -0.839913 0.232707 
0.80018 -0.555461 -0.226222 
0.743367 -0.661897 -0.0964274 
0.731271 -0.678222 -0.072512 
0.800158 -0.555254 -0.226805 
0.799591 -0.558053 -0.22188 
0.422292 -0.857129 0.294956 
0.804188 -0.549915 -0.225554 
0.408147 -0.857368 0.313585 
0.800932 -0.563342 -0.202863 
0.778451 -0.60338 -0.173051 
0.528919 -0.826281 0.193659 
0.597546 -0.794179 0.110539 
0.558923 -0.813789 0.159226 
0.412919 -0.857272 0.307544 
0.654325 -0.755505 0.0327212 
0.624991 -0.776326 0.0818821 
0.490509 -0.840019 0.231882 
0.428338 -0.853252 0.297469 
0.69774 -0.715922 -0.0247945 
0.462643 -0.846897 0.262157 
0.411904 -0.857409 0.308521 
0.798605 -0.566883 -0.20217 
0.531923 -0.82516 0.190183 
0.79464 -0.579722 -0.180193 
0.682701 -0.73069 -0.0033012 
0.668384 -0.743571 0.0191126 
0.726637 -0.684888 -0.0541001 
0.709107 -0.704076 -0.0379946 
0.634055 -0.769968 0.0715763 
0.753127 -0.648135 -0.112787 
0.775801 -0.611609 -0.155136 
0.799258 -0.569701 -0.191384 
0.578241 -0.803608 0.140897 
0.404008 -0.858945 0.31463 
0.504008 -0.83462 0.222229 
0.639087 -0.76686 0.0591108 
0.590502 -0.797378 0.124486 
0.544866 -0.819855 0.175952 
0.736935 -0.670935 -0.0822972 
0.466901 -0.846768 0.254927 
0.763392 -0.632869 -0.129268 
0.607824 -0.787282 0.103616 
0.426217 -0.854471 0.297018 
0.436465 -0.850869 0.292437 
0.683343 -0.730072 -0.00613335 
0.409732 -0.858642 0.307985 
0.789409 -0.588018 -0.176261 
0.800138 -0.559703 -0.215665 
0.439649 -0.85294 0.281428 
0.706532 -0.707229 -0.0252772 
0.776004 -0.613152 -0.147862 
0.692937 -0.720877 -0.0132197 
0.51047 -0.832898 0.213778 
0.723581 -0.688409 -0.0502377 
0.616847 -0.78139 0.0945012 
0.56405 -0.810752 0.156616 
0.443673 -0.852252 0.277165 
0.627054 -0.775434 0.0742036 
0.423747 -0.855442 0.297756 
0.524801 -0.827192 0.20084 
0.644396 -0.762828 0.0533653 
0.751803 -0.651563 -0.101279 
0.566684 -0.810806 0.146506 
0.704302 -0.709512 -0.0234893 
0.407107 -0.858557 0.31168 
0.668694 -0.743254 0.0205337 
0.59286 -0.796885 0.116152 
0.793157 -0.577473 -0.193459 
0.435779 -0.854808 0.28178 
0.793505 -0.574092 -0.201912 
0.756995 -0.641583 -0.123815 
0.690656 -0.723136 -0.00822517 
0.476213 -0.843993 0.246774 
0.490625 -0.839416 0.233812 
0.411781 -0.858419 0.305866 
0.715108 -0.697991 -0.0378056 
0.781483 -0.604593 -0.154114 
0.523385 -0.82887 0.197592 
0.425132 -0.856111 0.29383 
0.649506 -0.758465 0.053608 
0.599546 -0.792739 0.110047 
0.765632 -0.630274 -0.128692 
0.603617 -0.790994 0.0998704 
0.494137 -0.837751 0.232383 
0.43409 -0.855915 0.281027 
0.542494 -0.821211 0.176954 
0.68549 -0.728074 0.00337558 
0.733474 -0.675639 -0.0743481 
0.783474 -0.594669 -0.180381 
0.746627 -0.658671 -0.0932793 
0.480426 -0.843196 0.24127 
0.438942 -0.856171 0.272585 
0.794052 -0.576378 -0.193053 
0.423697 -0.85749 0.291876 
0.777596 -0.608727 -0.157468 
0.693536 -0.720397 -0.00592154 
0.63456 -0.770225 0.0639336 
0.539416 -0.824384 0.171526 
0.758553 -0.641511 -0.114284 
0.604231 -0.790169 0.102653 
0.415447 -0.858524 0.300566 
0.656488 -0.753678 0.0315102 
0.639087 -0.767194 0.0546051 
0.732491 -0.676968 -0.0719118 
0.48609 -0.840958 0.237708 
0.441761 -0.854576 0.273031 
0.512693 -0.832668 0.209308 
0.790936 -0.584123 -0.182263 
0.462549 -0.847825 0.25931 
0.788281 -0.586245 -0.186896 
0.6889 -0.724856 0.000655119 
0.596149 -0.79526 0.110305 
0.542688 -0.823664 0.164519 
0.74063 -0.666725 -0.0833328 
0.763532 -0.633497 -0.125301 
0.633203 -0.771879 0.0570711 
0.527452 -0.829593 0.183221 
0.580631 -0.803782 0.129624 
0.612665 -0.785098 0.0908981 
0.408561 -0.85914 0.308148 
0.651572 -0.757375 0.0428578 
0.786295 -0.590633 -0.181366 
0.472104 -0.844833 0.251744 
0.780067 -0.601869 -0.171023 
0.715117 -0.697594 -0.0443895 
0.806198 -0.558901 -0.194098 
0.582604 -0.803059 0.125178 
0.438121 -0.855171 0.277004 
0.494378 -0.839981 0.223654 
0.54704 -0.82059 0.165468 
0.77991 -0.599456 -0.17998 
0.671817 -0.740189 0.0279669 
0.45937 -0.848689 0.262119 
0.838629 -0.470475 -0.274509 
0.620897 -0.779589 0.0820278 
0.531281 -0.826445 0.186357 
0.718251 -0.693196 -0.0599619 
0.432152 -0.856557 0.282054 
0.676332 -0.736549 0.00838612 
0.778306 -0.603019 -0.174952 
0.423654 -0.85833 0.289459 
0.591308 -0.797411 0.120374 
0.46508 -0.847897 0.254501 
0.64686 -0.760309 0.0591824 
0.746321 -0.658632 -0.0959565 
0.768829 -0.624589 -0.13708 
0.70188 -0.711653 -0.0302405 
0.543351 -0.82255 0.167874 
0.568399 -0.809601 0.146521 
0.493911 -0.840297 0.223502 
0.837566 -0.471273 -0.276378 
0.435955 -0.854917 0.281175 
0.604504 -0.789011 0.109714 
0.773122 -0.618647 -0.13985 
0.529947 -0.828481 0.181039 
0.455263 -0.847716 0.272237 
0.720605 -0.690801 -0.0593454 
0.83979 -0.470284 -0.271268 
0.773092 -0.618698 -0.139791 
0.752548 -0.647971 -0.117493 
0.838845 -0.47319 -0.269129 
0.684183 -0.72928 0.00665446 
0.804072 -0.566415 -0.180671 
0.76816 -0.625245 -0.137836 
0.64104 -0.764105 0.0721839 
0.701351 -0.712213 -0.0293182 
0.6146 -0.783046 0.0954224 
0.838568 -0.476976 -0.263243 
0.575375 -0.805376 0.142523 
0.497484 -0.839011 0.220388 
0.654113 -0.754236 0.057142 
0.453344 -0.848711 0.272339 
0.429775 -0.856276 0.286505 
0.564206 -0.810307 0.158347 
0.765867 -0.629157 -0.132698 
0.730094 -0.679799 -0.0695418 
0.83335 -0.487479 -0.260562 
0.770941 -0.622349 -0.135394 
0.60151 -0.790919 0.112393 
0.837319 -0.476903 -0.267322 
0.685789 -0.727785 -0.00466623 
0.464843 -0.845523 0.262703 
0.447701 -0.850155 0.27713 
0.621101 -0.77671 0.104668 
0.696351 -0.717514 -0.0164361 
0.524737 -0.828687 0.194754 
0.650923 -0.756988 0.0571668 
0.760807 -0.636552 -0.126389 
0.492371 -0.841247 0.223327 
0.830275 -0.486598 -0.271785 
0.768209 -0.627063 -0.129026 
0.838607 -0.477107 -0.262882 
0.744992 -0.658895 -0.104139 
0.562611 -0.810028 0.165298 
0.600532 -0.790713 0.118887 
0.621999 -0.776455 0.101173 
0.679441 -0.733454 0.0201188 
0.563632 -0.810591 0.158938 
0.442701 -0.85083 0.283025 
0.462287 -0.845202 0.268188 
0.767919 -0.628672 -0.122769 
0.445915 -0.850473 0.279028 
0.507541 -0.835173 0.211868 
0.822142 -0.487222 -0.294445 
0.725458 -0.685365 -0.063139 
0.675298 -0.737348 0.0170776 
0.487179 -0.841732 0.232688 
0.740264 -0.666527 -0.0880373 
0.511874 -0.832832 0.210653 
0.710855 -0.702797 -0.0275916 
0.837404 -0.48472 -0.252587 
0.625073 -0.775833 0.0858284 
0.549066 -0.815046 0.185004 
0.556873 -0.812898 0.170559 
0.459578 -0.84753 0.265482 
0.608018 -0.785051 0.118358 
0.445824 -0.850838 0.278058 
0.661218 -0.748998 0.0423385 
0.749844 -0.654008 -0.100041 
0.836589 -0.488841 -0.247293 
0.702699 -0.711322 -0.0153377 
0.712857 -0.699907 -0.0443301 
0.470982 -0.846101 0.249579 
0.718633 -0.693169 -0.0555326 
0.664834 -0.746017 0.0381345 
0.453713 -0.848512 0.272344 
0.756089 -0.646816 -0.0997937 
0.531381 -0.822573 0.202503 
0.601676 -0.790612 0.113664 
0.537434 -0.822038 0.188198 
0.455268 -0.84905 0.268039 
0.822601 -0.478166 -0.30771 
0.718735 -0.69208 -0.0666704 
0.650459 -0.757206 0.0595173 
0.706402 -0.706881 -0.0362578 
0.687482 -0.726201 0.000858281 
0.467975 -0.84871 0.246355 
0.8259 -0.50383 -0.25307 
0.648364 -0.759343 0.0549732 
0.746809 -0.657964 -0.0967489 
0.528908 -0.824154 0.202552 
0.589557 -0.79754 0.127877 
0.832361 -0.497592 -0.244085 
0.705 -0.707833 -0.0441381 
0.52702 -0.827246 0.194715 
0.453867 -0.849434 0.269195 
0.705697 -0.707222 -0.042769 
0.47214 -0.846739 0.245188 
0.639464 -0.76562 0.0700814 
0.728972 -0.680635 -0.0730427 
0.440721 -0.852934 0.279764 
0.578094 -0.806035 0.126943 
0.637859 -0.766863 0.0711147 
0.573437 -0.805703 0.148368 
0.690366 -0.723303 -0.0150999 
0.451749 -0.851456 0.266355 
0.801985 -0.572142 -0.171678 
0.508782 -0.833141 0.216835 
0.472646 -0.846926 0.243561 
0.821063 -0.516017 -0.244095 
0.688757 -0.724659 -0.0219553 
0.62176 -0.777714 0.0926 
0.560637 -0.814177 0.151003 
0.780961 -0.608052 -0.142733 
0.72265 -0.688624 -0.0597852 
0.640054 -0.766144 0.0579093 
0.630633 -0.772569 0.0737508 
0.565984 -0.812246 0.141132 
0.508563 -0.833749 0.215004 
0.681029 -0.732229 0.00634553 
0.582293 -0.803715 0.122384 
0.470951 -0.846885 0.246965 
0.675896 -0.736994 0.00221797 
0.462403 -0.849856 0.252842 
0.611534 -0.784889 0.0998768 
0.80214 -0.528184 -0.278553 
0.546462 -0.819812 0.171134 
0.620268 -0.779276 0.0894259 
0.708976 -0.704754 -0.0259866 
0.448738 -0.852106 0.269351 
0.554831 -0.816726 0.1585 
0.509363 -0.834183 0.211396 
0.633633 -0.770939 0.0645257 
0.505825 -0.834984 0.216664 
0.56402 -0.813911 0.139392 
0.664683 -0.746596 0.0281179 
0.47967 -0.843408 0.242034 
0.71484 -0.698642 -0.0300516 
0.665979 -0.745459 0.0276153 
0.604235 -0.788634 0.113825 
0.537533 -0.82278 0.184638 
0.623852 -0.777717 0.0772303 
0.536234 -0.825734 0.174972 
0.550378 -0.820005 0.157084 
0.479186 -0.844284 0.239926 
0.780679 -0.597364 -0.183567 
0.654613 -0.754827 0.0414451 
0.49915 -0.836761 0.225121 
0.692773 -0.721155 0.000639131 
0.597976 -0.791174 0.128329 
0.738234 -0.669949 -0.0786038 
0.710901 -0.702886 -0.0239219 
0.813086 -0.504439 -0.290571 
0.660739 -0.749683 0.0374183 
0.531116 -0.825371 0.191518 
0.776395 -0.609201 -0.161509 
0.533347 -0.826083 0.182009 
0.549512 -0.816768 0.17586 
0.692536 -0.721371 0.00419386 
0.618526 -0.780639 0.0896005 
0.477933 -0.844481 0.241725 
0.509832 -0.833062 0.214661 
0.590842 -0.794297 0.141416 
0.702691 -0.711314 -0.0160778 
0.632434 -0.771215 0.0724949 
0.703126 -0.711044 -0.00551981 
0.498255 -0.838474 0.220689 
0.524233 -0.829304 0.193479 
0.786925 -0.562248 -0.254217 
0.687312 -0.726342 0.00544523 
0.535315 -0.824039 0.185466 
0.506388 -0.83589 0.2118 
0.646106 -0.760913 0.0596447 
0.580785 -0.800321 0.148913 
0.701679 -0.712393 -0.0119571 
0.503591 -0.836354 0.216584 
0.518009 -0.830284 0.205657 
0.576197 -0.802989 0.152334 
0.497217 -0.838939 0.221263 
0.618407 -0.780178 0.0943104 
0.563358 -0.809408 0.165788 
0.514673 -0.832816 0.20379 
0.76597 -0.62463 -0.152077 
0.690515 -0.723315 -0.00194869 
0.625964 -0.775149 0.0855195 
0.503166 -0.836138 0.218398 
0.560188 -0.810111 0.172945 
0.630526 -0.773647 0.0625105 
0.513087 -0.832187 0.210252 
0.740023 -0.665778 -0.0954239 
0.68309 -0.730159 0.0159728 
0.495619 -0.838917 0.2249 
0.552315 -0.814167 0.179111 
0.608488 -0.786181 0.107987 
0.514347 -0.831231 0.210955 
0.527228 -0.824949 0.203691 
0.613534 -0.784384 0.0912 
0.72988 -0.679911 -0.0706821 
0.544071 -0.819697 0.179116 
0.603966 -0.78963 0.108209 
0.667201 -0.744146 0.0330162 
0.516756 -0.829971 0.210024 
0.492114 -0.839936 0.228761 
0.603913 -0.791937 0.0901423 
0.721273 -0.690845 -0.0499837 
0.534064 -0.824538 0.186848 
0.56183 -0.813432 0.150584 
0.590398 -0.797941 0.121325 
0.657331 -0.752501 0.0407148 
0.669652 -0.742316 0.0231007 
0.593205 -0.79901 0.0984476 
0.514305 -0.830625 0.21343 
0.52766 -0.827319 0.192663 
0.700081 -0.713927 -0.0139211 
0.762252 -0.634484 -0.128069 
0.575816 -0.806048 0.136831 
0.645185 -0.761151 0.0662164 
0.650671 -0.757731 0.0497085 
0.508893 -0.833836 0.213882 
0.519195 -0.830831 0.20039 
0.697726 -0.7162 -0.01538 
0.524825 -0.829237 0.19216 
0.810321 -0.540284 -0.226878 
0.808366 -0.541456 -0.231018 
0.816632 -0.522941 -0.244224 
0.504816 -0.834891 0.21936 
0.817697 -0.519416 -0.24815 
0.798141 -0.567152 -0.20325 
0.556682 -0.813922 0.166239 
0.635976 -0.767791 0.0776629 
0.817708 -0.519421 -0.248103 
0.788574 -0.583103 -0.195299 
0.573603 -0.807483 0.137666 
0.510239 -0.833176 0.213246 
0.78298 -0.60364 -0.150202 
0.819663 -0.51764 -0.245358 
0.642436 -0.763816 0.0621448 
0.819882 -0.518189 -0.243462 
0.519734 -0.831428 0.196481 
0.681464 -0.731631 0.0179761 
0.826679 -0.509615 -0.238524 
0.557898 -0.813512 0.164161 
0.778441 -0.613065 -0.134838 
0.612501 -0.783398 0.1055 
0.77901 -0.600721 -0.179661 
0.82876 -0.508601 -0.233413 
0.487517 -0.838944 0.241867 
0.757648 -0.645936 -0.0934637 
0.680668 -0.732262 0.0219817 
0.556134 -0.816211 0.156574 
0.828765 -0.508618 -0.233359 
0.523142 -0.82975 0.194519 
0.769093 -0.622755 -0.143783 
0.766167 -0.634961 -0.0990576 
0.610613 -0.784059 0.111372 
0.558115 -0.814348 0.159198 
0.543671 -0.821477 0.172036 
0.49458 -0.837168 0.23354 
0.833958 -0.510028 -0.210678 
0.811389 -0.538035 -0.228399 
0.507731 -0.833901 0.216377 
0.531482 -0.826969 0.183439 
0.547676 -0.820019 0.166193 
0.662003 -0.747978 0.0477627 
0.757694 -0.647546 -0.0811374 
0.75497 -0.642179 -0.132762 
0.587041 -0.798227 0.134966 
0.835886 -0.510965 -0.200525 
0.748534 -0.656929 -0.0902248 
0.541395 -0.823521 0.169421 
0.66434 -0.74625 0.0419858 
0.495797 -0.838617 0.225625 
0.579297 -0.803729 0.135777 
0.748116 -0.660216 -0.0666133 
0.504799 -0.835362 0.217599 
0.497531 -0.83721 0.227029 
0.741075 -0.664134 -0.0986645 
0.832807 -0.512803 -0.208483 
0.552276 -0.817611 0.162798 
0.657442 -0.75078 0.0640289 
0.576455 -0.805664 0.136402 
0.662741 -0.747825 0.0391501 
0.723413 -0.68835 -0.0533662 
0.501505 -0.836888 0.219343 
0.51665 -0.83426 0.192569 
0.718194 -0.69326 -0.0599013 
0.644424 -0.761112 0.0736634 
0.564171 -0.811755 0.15088 
0.569976 -0.809617 0.140168 
0.70935 -0.70401 -0.0345386 
0.499209 -0.838672 0.217759 
0.522211 -0.830721 0.192866 
0.830568 -0.523898 -0.188912 
0.830572 -0.523898 -0.188895 
0.823896 -0.534471 -0.188512 
0.705978 -0.70675 -0.045818 
0.62815 -0.772399 0.0939551 
0.822292 -0.53463 -0.194954 
0.654331 -0.755788 0.0251977 
0.501675 -0.83841 0.213052 
0.842464 -0.512206 -0.167028 
0.524769 -0.829373 0.191724 
0.694855 -0.718861 -0.0203801 
0.81962 -0.54012 -0.191033 
0.56694 -0.811634 0.140816 
0.620219 -0.778872 0.0932009 
0.68977 -0.723781 -0.0189287 
0.794231 -0.57814 -0.186952 
0.80454 -0.564855 -0.183455 
0.521405 -0.830032 0.197949 
0.562108 -0.813012 0.151809 
0.680961 -0.732319 0.00104145 
0.77337 -0.611129 -0.168583 
0.765214 -0.631507 -0.125085 
0.610853 -0.78387 0.111384 
0.545386 -0.820858 0.169548 
0.675755 -0.737053 0.0103514 
0.48031 -0.842174 0.24504 
0.571721 -0.807278 0.146413 
0.769784 -0.630026 -0.102473 
0.869679 -0.4799 -0.115561 
0.731083 -0.681134 -0.0396783 
0.665961 -0.745194 0.0343719 
0.761161 -0.644173 -0.0753372 
0.605948 -0.788457 0.105651 
0.523948 -0.830288 0.189998 
0.664686 -0.746398 0.0329168 
0.573176 -0.806604 0.144429 
0.758706 -0.647272 -0.0735104 
0.654921 -0.754371 0.0447475 
0.599327 -0.793237 0.107621 
0.746806 -0.662886 -0.0535005 
0.572248 -0.805111 0.155975 
0.655183 -0.75399 0.0472733 
0.562399 -0.810784 0.162285 
0.744044 -0.66553 -0.0588976 
0.633918 -0.769774 0.0747986 
0.585194 -0.799837 0.13345 
0.742696 -0.668347 -0.0414175 
0.571045 -0.806116 0.155189 
0.650447 -0.757449 0.0564847 
0.547008 -0.819546 0.170667 
0.741336 -0.670087 -0.0374825 
0.582447 -0.802178 0.131402 
0.629164 -0.772696 0.0842231 
0.566317 -0.808655 0.159253 
0.724985 -0.688565 -0.0165819 
0.638667 -0.766431 0.0684716 
0.588341 -0.79986 0.118657 
0.611261 -0.784215 0.106615 
0.573126 -0.807073 0.141983 
0.567508 -0.808722 0.154606 
0.722152 -0.691576 -0.0147561 
0.633764 -0.769535 0.0784745 
0.573472 -0.807207 0.139807 
0.686714 -0.726755 0.0158553 
0.56561 -0.809821 0.155804 
0.600201 -0.791714 0.113788 
0.56491 -0.810614 0.154215 
0.614906 -0.782169 0.100511 
0.568472 -0.809653 0.145949 
0.683249 -0.729961 0.0180926 
0.561383 -0.81188 0.160311 
0.600538 -0.792308 0.107715 
0.567156 -0.810071 0.148725 
0.63338 -0.771899 0.0547964 
0.596786 -0.795724 0.103293 
0.568037 -0.80944 0.148798 
0.632197 -0.77268 0.0573871 
0.584325 -0.802131 0.123085 
0.589289 -0.800107 0.112104 
0.553494 -0.816609 0.16369 
0.564346 -0.811703 0.150506 
0.620246 -0.780695 0.0762234 
0.552323 -0.817825 0.161563 
0.61481 -0.78374 0.088088 
0.580603 -0.805019 0.121837 
0.561199 -0.813264 0.15381 
0.607561 -0.788787 0.0931961 
0.579958 -0.805402 0.122376 
0.557909 -0.8148 0.157604 
0.601242 -0.792499 0.10224 
0.573102 -0.808971 0.13084 
0.556169 -0.816099 0.157031 
0.601143 -0.792503 0.102794 
0.572381 -0.809756 0.129134 
0.555556 -0.816493 0.15715 
0.595822 -0.794734 0.115734 
0.577996 -0.806022 0.127471 
0.595839 -0.794725 0.115709 
0.562555 -0.813575 0.14706 
0.567756 -0.810313 0.145072 
0.589296 -0.797905 0.126795 
0.562727 -0.813579 0.146384 
0.589363 -0.797867 0.126729 
0.568168 -0.809762 0.146528 
0.585191 -0.799025 0.138241 
0.56815 -0.809772 0.146543 
0.585218 -0.79901 0.138212 
0.568282 -0.808772 0.151469 
0.585227 -0.799005 0.138201 
0.585221 -0.799008 0.138211 
0.585218 -0.79901 0.138213 
0.58519 -0.799025 0.138244 
0.585146 -0.79905 0.138288 
0.568187 -0.80882 0.151571 
0.585157 -0.799044 0.138276 
0.585164 -0.799039 0.138271 
