# Supplementary material for: Fast Cylindrical Fitting Method Using Point Cloud’s Normals Estimation
Source: Hindawi journal article supplement (doi:10.1155/2018/8904653), 2018-12-12
Supplement: f1 [file 8904653.f1.zip › Point data/picking_list_end.txt.txt]

0	-6.537724018097	-12.481484413147	4.351709842682
1	-6.514091014862	-12.433705329895	4.288211822510
2	-6.541515827179	-12.509859085083	4.371719837189
3	-6.555324077606	-12.561409950256	4.385055065155
4	-6.576291561127	-12.614782333374	4.380855083466
5	-6.531957149506	-12.443681716919	4.305160522461
6	-6.520045757294	-12.425647735596	4.220055103302
7	-6.539380550385	-12.436738014221	4.175376415253
8	-6.571972370148	-12.448909759521	4.138448715210
9	-6.596277713776	-12.635567665100	4.371385574341
