# Supplementary material for: Fast Cylindrical Fitting Method Using Point Cloud’s Normals Estimation
Source: Hindawi journal article supplement (doi:10.1155/2018/8904653), 2018-12-12
Supplement: f1 [file 8904653.f1.zip › Point data/picking_list_front.txt.txt]

0	-12.264316558838	-12.700171470642	2.661045074463
1	-12.285295486450	-12.728738784790	2.744786262512
2	-12.294242858887	-12.771678924561	2.783245086670
3	-12.298055648804	-12.836645126343	2.808834552765
4	-12.295356750488	-12.884001731873	2.809059619904
5	-12.300872802734	-12.935876846313	2.792524576187
6	-12.281660079956	-12.962183952332	2.771153926849
7	-12.231781005859	-12.965010643005	2.541133880615
8	-12.255176544189	-12.702762603760	2.628322839737
9	-12.243814468384	-12.715733528137	2.586986541748
10	-12.235918045044	-12.801059722900	2.507078170776
11	-12.223356246948	-12.871555328369	2.500948667526
12	-12.229505538940	-12.938449859619	2.521759986877
13	-12.272933959961	-12.985865592957	2.735430717468
