# Supplementary material for: Fast Cylindrical Fitting Method Using Point Cloud’s Normals Estimation
Source: Hindawi journal article supplement (doi:10.1155/2018/8904653), 2018-12-12
Supplement: f1 [file 8904653.f1.zip › Point data/pipe1.txt]

-3.7757773 -3.1319137 -1.4090218
-3.7735630 -3.1073118 -1.4003103
-3.7601731 -3.1556647 -1.3934202
-3.7574769 -3.1009230 -1.3818071
-3.7475166 -3.1793821 -1.3808246
-3.7504628 -3.1355108 -1.3796919
-3.7389216 -3.2017403 -1.3709040
-3.7334958 -3.1545890 -1.3617673
-3.7327679 -3.2266576 -1.3610214
-3.7350874 -3.1230565 -1.3603404
-3.7296003 -3.1791987 -1.3576417
-3.7313267 -3.0992369 -1.3530264
-3.7239267 -3.2049172 -1.3507235
-3.7253744 -3.2518578 -1.3486240
-3.7216647 -3.1400522 -1.3457226
-3.7314807 -3.0595278 -1.3447171
-3.7165737 -3.2271811 -1.3395763
-3.7140651 -3.1768074 -1.3382160
-3.7140419 -3.1035601 -1.3335184
-3.7180420 -3.2794741 -1.3332663
-3.7092315 -3.2007951 -1.3312612
-3.7111655 -3.2517900 -1.3285432
-3.7058415 -3.1563755 -1.3277745
-3.7069695 -3.1276410 -1.3276911
-3.7082121 -3.0807210 -1.3232099
-3.7138133 -3.3058323 -1.3198313
-3.6988731 -3.1783934 -1.3188520
-3.7020670 -3.2279592 -1.3187756
-3.6981952 -3.1030109 -1.3143131
-3.7039420 -3.2721677 -1.3132723
-3.6915283 -3.1315617 -1.3089663
-3.6924901 -3.2017986 -1.3086356
-3.6968907 -3.2493270 -1.3077191
-3.7106900 -3.3289554 -1.3066268
-3.6882724 -3.1578443 -1.3055191
-3.6931497 -3.0739191 -1.3052491
-3.6999198 -3.2944733 -1.3010372
-3.6864419 -3.2254737 -1.2975839
-3.6823565 -3.1057481 -1.2960220
-3.6802715 -3.1854514 -1.2934012
-3.7081171 -3.3495613 -1.2930699
-3.6894302 -3.2682358 -1.2922283
-3.6834405 -3.0527465 -1.2904684
-3.6757889 -3.1415470 -1.2895420
-3.6969463 -3.3193955 -1.2871339
-3.6750022 -3.2094158 -1.2833525
-3.6712922 -3.1645316 -1.2831855
-3.6792477 -3.2440607 -1.2828156
-3.6729566 -3.0812727 -1.2826530
-3.6868090 -3.2960539 -1.2794909
-3.6682288 -3.1189562 -1.2794830
-3.7066700 -3.3706821 -1.2793906
-3.6946075 -3.3422873 -1.2741398
-3.6692746 -3.0403283 -1.2729690
-3.6756315 -3.2664331 -1.2718685
-3.6642074 -3.1853004 -1.2717305
-3.6597387 -3.1450291 -1.2688068
-3.6667242 -3.2295301 -1.2676872
-3.6593738 -3.0996042 -1.2675420
-3.6608355 -3.0674422 -1.2666632
-3.6843897 -3.3185798 -1.2663763
-3.7086630 -3.3946429 -1.2661838
-3.6618179 -3.0157964 -1.2605761
-3.6734152 -3.2904285 -1.2598606
-3.6937970 -3.3637535 -1.2587921
-3.6516626 -3.1239640 -1.2587156
-3.6565482 -3.2055786 -1.2576477
-3.6526274 -3.1676926 -1.2574281
-3.6616656 -3.2511913 -1.2544948
-3.6822541 -3.3397073 -1.2521625
-3.6532743 -3.0241456 -1.2514494
-3.6464061 -3.0861835 -1.2508793
-3.6440745 -3.1455356 -1.2478313
-3.7058056 -3.4109268 -1.2470571
-3.6449880 -3.0463242 -1.2460871
-3.6709157 -3.3134079 -1.2459236
-3.6957803 -3.3873746 -1.2457850
-3.6509908 -3.2285646 -1.2441982
-3.6594114 -3.2744789 -1.2432661
-3.6441481 -3.1875937 -1.2429453
-3.6378562 -3.1115380 -1.2409497
-3.6805856 -3.3595554 -1.2362600
-3.6432236 -2.9922447 -1.2339877
-3.6355530 -3.1652692 -1.2338337
-3.6328452 -3.0687143 -1.2336737
-3.6360256 -3.0217248 -1.2320973
-3.6473953 -3.2513756 -1.2315790
-3.7061194 -3.4309124 -1.2311784
-3.6688755 -3.3341512 -1.2306685
-3.6381667 -3.2072714 -1.2300637
-3.6573128 -3.2970052 -1.2299218
-3.6291295 -3.1365110 -1.2284863
-3.6255010 -3.0926829 -1.2247112
-3.6922535 -3.4054708 -1.2244516
-3.6818045 -3.3815783 -1.2221043
-3.6296509 -3.1859797 -1.2215831
-3.6458666 -3.2744354 -1.2200879
-3.6359930 -3.2334172 -1.2193415
-3.6204131 -3.1163327 -1.2176083
-3.6241579 -3.0019586 -1.2158968
-3.6553889 -3.3170913 -1.2154807
-3.6182480 -3.0619590 -1.2153216
-3.6679387 -3.3543974 -1.2149640
-3.6213408 -3.1569126 -1.2147919
-3.7079723 -3.4504385 -1.2140984
-3.6257085 -3.2119619 -1.2094776
-3.6943720 -3.4263855 -1.2090159
-3.6148142 -3.0384554 -1.2089188
-3.6445631 -3.2968154 -1.2073506
-3.6105406 -3.0850800 -1.2059824
-3.6117657 -3.1368729 -1.2040804
-3.6323061 -3.2579656 -1.2040284
-3.6789659 -3.3970961 -1.2030797
-3.6147064 -3.1767674 -1.2018969
-3.6549740 -3.3392458 -1.2004604
-3.6677359 -3.3738300 -1.1996124
-3.6079733 -3.0146555 -1.1987258
-3.7100699 -3.4684947 -1.1969102
-3.6041733 -3.1111569 -1.1966917
-3.6135414 -2.9602342 -1.1952062
-3.6208826 -3.2360314 -1.1938756
-3.5998514 -3.0653819 -1.1919948
-3.6970605 -3.4469368 -1.1915312
-3.6315544 -3.2833114 -1.1913912
-3.6121108 -3.2041048 -1.1908232
-3.6416024 -3.3170281 -1.1901672
-3.6036026 -3.1580496 -1.1889746
-3.6815950 -3.4177386 -1.1883246
-3.6005145 -2.9817690 -1.1859220
-3.5953919 -3.0888037 -1.1858826
-3.6548799 -3.3599610 -1.1843945
-3.5972193 -3.1338569 -1.1842663
-3.6182678 -3.2577699 -1.1804881
-3.6655652 -3.3906430 -1.1803904
-3.7136434 -3.4866469 -1.1797314
-3.6012549 -3.1848224 -1.1790821
-3.6435013 -3.3384592 -1.1784052
-3.5872680 -3.0503550 -1.1761314
-3.6069763 -3.2232763 -1.1760526
-3.5946450 -2.9589306 -1.1756754
-3.6995949 -3.4651650 -1.1735281
-3.5873339 -3.1109782 -1.1730976
-3.6279750 -3.3031584 -1.1729396
-3.6842639 -3.4373573 -1.1721225
-3.5833038 -3.0239428 -1.1704923
-3.5857170 -2.9927424 -1.1695965
-3.5889163 -3.1540825 -1.1684872
-3.6181575 -3.2808310 -1.1684587
-3.5812699 -3.0793290 -1.1678677
-3.6695300 -3.4118757 -1.1668081
-3.5956266 -3.2046291 -1.1643145
-3.6495315 -3.3720327 -1.1632081
-3.6040666 -3.2456579 -1.1615943
-3.6296385 -3.3262221 -1.1600408
-3.5797314 -3.1310209 -1.1593654
-3.5865858 -3.1781342 -1.1590941
-3.7172484 -3.5046101 -1.1588878
-3.5763251 -2.9682615 -1.1562177
-3.5716171 -3.0556057 -1.1560405
-3.6375382 -3.3508474 -1.1560343
-3.7037955 -3.4839781 -1.1556731
-3.5732456 -3.0992185 -1.1551022
-3.6564019 -3.3966839 -1.1529366
-3.6151625 -3.2991153 -1.1510796
-3.6844050 -3.4530648 -1.1510720
-3.5694612 -2.9930603 -1.1510351
-3.6727170 -3.4310146 -1.1509726
-3.6043128 -3.2673566 -1.1504981
-3.5917224 -3.2246765 -1.1503560
-3.5671159 -3.0288031 -1.1493268
-3.5655020 -3.0773234 -1.1466116
-3.5738765 -3.1527243 -1.1461001
-3.5814206 -3.1979262 -1.1437645
-3.5661062 -3.1196064 -1.1417791
-3.6398222 -3.3730474 -1.1400657
-3.5673698 -2.9272962 -1.1397280
-3.6246127 -3.3395089 -1.1387714
-3.7218085 -3.5219803 -1.1385546
-3.5910690 -3.2467018 -1.1382039
-3.5573650 -3.0481411 -1.1375566
-3.5605198 -2.9678707 -1.1374554
-3.6907474 -3.4727782 -1.1369925
-3.7063967 -3.4990195 -1.1364844
-3.5718998 -3.1759739 -1.1362237
-3.5584403 -3.0971387 -1.1343616
-3.6136303 -3.3183431 -1.1336737
-3.5542892 -3.0134148 -1.1336094
-3.6015404 -3.2867898 -1.1333860
-3.6577060 -3.4157541 -1.1328203
-3.6728236 -3.4455189 -1.1307336
-3.5784055 -3.2182836 -1.1303454
-3.5606415 -3.1421719 -1.1284890
-3.5507640 -3.0736903 -1.1266081
-3.6434512 -3.3942128 -1.1253809
-3.6250903 -3.3586160 -1.1221514
-3.5876329 -3.2643567 -1.1218109
-3.7310108 -3.5420616 -1.1210814
-3.5443765 -3.0357241 -1.1207619
-3.5513560 -3.1169898 -1.1205640
-3.5670080 -3.1969031 -1.1201514
-3.5424606 -2.9972225 -1.1178589
-3.5582584 -3.1674254 -1.1172599
-3.5775087 -3.2412430 -1.1171287
-3.6134587 -3.3369856 -1.1170377
-3.7107946 -3.5142188 -1.1170060
-3.6001354 -3.3050676 -1.1165810
-3.6948846 -3.4902901 -1.1165450
-3.6813350 -3.4694878 -1.1145203
-3.5415106 -2.9557348 -1.1140192
-3.5438494 -3.0944209 -1.1139981
-3.6580801 -3.4312908 -1.1126308
-3.5378884 -3.0591858 -1.1104960
-3.6305082 -3.3806312 -1.1099867
-3.5434680 -2.9030749 -1.1089379
-3.5472236 -3.1438519 -1.1075621
-3.5654049 -3.2184566 -1.1073485
-3.6442059 -3.4098723 -1.1068523
-3.5333251 -3.0184859 -1.1063728
-3.5860664 -3.2839963 -1.1047419
-3.6671574 -3.4530898 -1.1019389
-3.7399022 -3.5604564 -1.1017678
-3.5527919 -3.1865966 -1.1011536
-3.5294133 -2.9727710 -1.1011379
-3.5753275 -3.2598486 -1.1011260
-3.7202724 -3.5344274 -1.1006108
-3.6003677 -3.3245169 -1.1004479
-3.6151399 -3.3576874 -1.0999700
-3.5365351 -3.1134352 -1.0990686
-3.6998542 -3.5065621 -1.0965927
-3.5303676 -3.0840438 -1.0961052
-3.5238233 -2.9995251 -1.0945432
-3.5251337 -3.0404709 -1.0943997
-3.6843154 -3.4842890 -1.0941148
-3.5229463 -2.9500233 -1.0916674
-3.5419946 -3.1647984 -1.0916487
-3.5628085 -3.2403148 -1.0904871
-3.6505168 -3.4327565 -1.0893996
-3.6292015 -3.3944604 -1.0893630
-3.5864418 -3.3050556 -1.0886375
-3.5513461 -3.2100659 -1.0871515
-3.5332027 -3.1401885 -1.0863490
-3.5213052 -3.0634881 -1.0862884
-3.7483153 -3.5758155 -1.0838401
-3.5188217 -2.9251525 -1.0836172
-3.5728021 -3.2770228 -1.0835334
-3.6017012 -3.3440770 -1.0834054
-3.5141764 -2.9746637 -1.0820519
-3.5148420 -3.0210459 -1.0820023
-3.7268251 -3.5489598  -1.0814309
-3.6155983 -3.3743249 -1.0809859
-3.6687455 -3.4663285 -1.0808112
-3.5218983 -3.1008634 -1.0801626
-3.7086194 -3.5256140 -1.0793521
-3.5398060 -3.1866926 -1.0786810
-3.6884380 -3.4988576 -1.0746237
-3.6362901 -3.4167692 -1.0745836
-3.5880672 -3.3241451 -1.0735984
-3.5101514 -3.0453777 -1.0732760
-3.5587517 -3.2569571 -1.0713911
-3.5283441 -3.1591957 -1.0713098
-3.5066191 -2.9445538 -1.0712667
-3.5487807 -3.2285870 -1.0711454
-3.5057425 -2.9953058 -1.0711266
-3.5201202 -3.1241716 -1.0704047
-3.6535611 -3.4479437 -1.0701042
-3.5117315 -3.0801276 -1.0695110
-3.7593777 -3.5919957 -1.0678559
-3.5742610 -3.2989553 -1.0677427
-3.6213103 -3.3963459 -1.0652368
-3.5047081 -2.9093300 -1.0646018
-3.4997179 -2.9680414 -1.0636931
-3.5372357 -3.2064096 -1.0633640
-3.6010065 -3.3601526 -1.0632548
-3.7347958 -3.5636034 -1.0627466
-3.5000782 -3.0211295 -1.0615665
-3.6710796 -3.4793908 -1.0594700
-3.5091603 -3.1054963 -1.0591753
-3.5619397 -3.2796467 -1.0589303
-3.6973429 -3.5165143 -1.0587858
-3.7179670 -3.5435449 -1.0584342
-3.5263206 -3.1834831 -1.0564868
-3.5149947 -3.1436195 -1.0556470
-3.4994314 -3.0644105 -1.0546635
-3.5872746 -3.3404059 -1.0538132
-3.4928197 -2.9290384 -1.0532001
-3.6392464 -3.4337787 -1.0528661
-3.5454563 -3.2456083 -1.0528575
-3.5751950 -3.3172017 -1.0516918
-3.4909955 -2.9959505 -1.0514595
-3.6081434 -3.3826764 -1.0499994
-3.7700580 -3.6065201 -1.0489749
-3.7466173 -3.5802731 -1.0489049
-3.4933291 -2.8844899 -1.0488077
-3.6562127 -3.4621114 -1.0487054
-3.4922372 -3.0418699 -1.0481449
-3.6818740 -3.4989956 -1.0476855
-3.6244644 -3.4127209 -1.0470467
-3.4859496 -2.9577619 -1.0459034
-3.5335797 -3.2233807 -1.0455363
-3.5143182 -3.1653208 -1.0443173
-3.4964402 -3.0913459 -1.0434839
-3.5027258 -3.1230372 -1.0430066
-3.5608221 -3.2963977 -1.0410939
-3.4849702 -3.0195105 -1.0409716
-3.5484983 -3.2687981 -1.0403192
-3.7264311 -3.5580490 -1.0399273
-3.5932300 -3.3630260 -1.0395491
-3.4829719 -2.9105121 -1.0394066
-3.7054425 -3.5326363 -1.0388556
-3.5204836 -3.1979912 -1.0373430
-3.4784162 -2.9792565 -1.0358883
-3.6672954 -3.4830222 -1.0356393
-3.4778133 -2.9349622 -1.0349531
-3.4858743 -3.0697013 -1.0330132
-3.6433570 -3.4498401 -1.0320179
-3.5740341 -3.3322078 -1.0319241
-3.5016083 -3.1461266 -1.0315879
-3.7805488 -3.6197248 -1.0313352
-3.5344062 -3.2452009 -1.0308797
-3.6900959 -3.5151605 -1.0306906
-3.6099509 -3.3979482 -1.0305559
-3.6292910 -3.4303397 -1.0282682
-3.7579675 -3.5958633 -1.0281897
-3.4780730 -3.0429490 -1.0274738
-3.4702870 -2.9570129 -1.0257388
-3.4745615 -2.8783451 -1.0251500
-3.7391346 -3.5752289 -1.0243799
-3.4715018 -3.0035444 -1.0242854
-3.5075175 -3.1803172 -1.0241991
-3.4887735 -3.1130389 -1.0238746
-3.5202148 -3.2189334 -1.0224611
-3.5960400 -3.3795625 -1.0216174
-3.5596051 -3.3116865 -1.0215258
-3.4676002 -2.9162447 -1.0213264
-3.5454541 -3.2825948 -1.0203506
-3.5802055 -3.3534394 -1.0186950
-3.6538430 -3.4705280 -1.0184066
-3.7134027 -3.5467533 -1.0183323
-3.6743424 -3.4984399 -1.0172490
-3.4795056 -3.0895603 -1.0171005
-3.4626633 -2.9792552 -1.0145638
-3.5334015 -3.2627585 -1.0130766
-3.6159175 -3.4166392 -1.0129124
-3.4659215 -3.0274037 -1.0125095
-3.4885210 -3.1407491 -1.0114319
-3.4710733 -3.0650919 -1.0112501
-3.7898038 -3.6303559 -1.0112206
-3.4629651 -2.8606419 -1.0108052
-3.4596426 -2.8910792 -1.0097832
-3.5072895 -3.2013717 -1.0093112
-3.7694884 -3.6096372 -1.0091022
-3.6349715 -3.4469231 -1.0089323
-3.4948016 -3.1662736 -1.0088062
-3.5210211 -3.2388491 -1.0082938
-3.6950936 -3.5267771 -1.0080047
-3.4562636 -2.9415453 -1.0079489
-3.5642714 -3.3317638 -1.0077021
-3.7487524 -3.5879021 -1.0058959
-3.7284686 -3.5661877 -1.0043421
-3.6004396 -3.3967728 -1.0040327
-3.4566284 -3.0004642 -1.0036374
-3.4774998 -3.1189394 -1.0026672
-3.5465534 -3.3016153 -1.0025016
-3.4507593 -2.9167104 -1.0003373
-3.5842204 -3.3724901 -0.9989363
-3.4501421 -2.9631441 -0.9987584
-3.6609401 -3.4861428 -0.9986339
-3.4592071 -3.0462998 -0.9980942
-3.4658834 -3.0855918 -0.9964823
-3.5340680 -3.2810881 -0.9956176
-3.8071297 -3.6477874 -0.9951285
-3.5078256 -3.2222624 -0.9950672
-3.6797309 -3.5109103 -0.9941274
-3.6449116 -3.4662960 -0.9938854
-3.7099658 -3.5471006 -0.9930492
-3.4923196 -3.1843073 -0.9927641
-3.5701229 -3.3526962 -0.9924938
-3.6207138 -3.4325949 -0.9924773
-3.5219806 -3.2586550 -0.9918508
-3.4456307 -2.8733034 -0.9917411
-3.4498761 -3.0226450 -0.9896284
-3.4798330 -3.1529532 -0.9890404
-3.5516087 -3.3222693 -0.9879502
-3.7775466 -3.6188639 -0.9872568
-3.4405626 -2.9414301 -0.9871750
-3.4431880 -2.9892006 -0.9864363
-3.7583208 -3.5997968 -0.9857079
-3.4390882 -2.8993332 -0.9854076
-3.7376466 -3.5781918 -0.9852320
-3.6046100 -3.4124478 -0.9845419
-3.6923261 -3.5284038 -0.9829165
-3.4528794 -3.0647653 -0.9828160
-3.4631037 -3.1079671 -0.9827370
-3.4696805 -3.1319034 -0.9823050
-3.5909376 -3.3925160 -0.9820212
-3.4948538 -3.2067816 -0.9814066
-3.6310013 -3.4519326 -0.9789420
-3.5367735 -3.3017552 -0.9782001
-3.4369170 -2.8443931 -0.9781542
-3.7938784 -3.6346795 -0.9772683
-3.5078387 -3.2418649 -0.9772128
-3.4344063 -2.9649700 -0.9769016
-3.6541182 -3.4834674 -0.9753698
-3.5765384 -3.3732946 -0.9751993
-3.4306256 -2.9222270 -0.9748768
-3.7202705 -3.5606344 -0.9747729
-3.4434509 -3.0433967 -0.9744604
-3.5229716 -3.2777537 -0.9737178
-3.5578174 -3.3428333 -0.9735171
-3.8172865 -3.6559353 -0.9731731
-3.4367533 -3.0109151 -0.9729033
-3.4519075 -3.0870405 -0.9726928
-3.4294952 -2.8728460 -0.9722524
-3.4768904 -3.1705297 -0.9720440
-3.6697965 -3.5037599 -0.9720110
-3.6130125 -3.4307158 -0.9691296
-3.7038455 -3.5437103 -0.9662696
-3.4291201 -2.9879850 -0.9661426
-3.4249080 -2.9455725 -0.9656705
-3.5428296 -3.3216929 -0.9651703
-3.7688359 -3.6108836 -0.9646716
-3.4820158 -3.1942797 -0.9646256
-3.4227776 -2.8964507 -0.9646082
-3.7474729 -3.5897361 -0.9645523
-3.4935465 -3.2243510 -0.9629177
-3.4643142 -3.1483122 -0.9624673
-3.4544293 -3.1186726 -0.9621234
-3.4398137 -3.0647681 -0.9614448
-3.5960996 -3.4094136 -0.9613194
-3.6838024 -3.5221921 -0.9608683
-3.4215794 -2.8510325 -0.9600243
-3.5087050 -3.2610058 -0.9591460
-3.6376544 -3.4668433 -0.9587828
-3.4292897 -3.0279735 -0.9570531
-3.5623591 -3.3604903 -0.9559498
-3.8323345 -3.6673353 -0.9559231
-3.7301067 -3.5727069 -0.9557807
-3.5251593 -3.2960859 -0.9557652
-3.4160984 -2.9205121 -0.9554794
-3.8033216 -3.6425148 -0.9548978
-3.4187943 -2.8272294 -0.9547667
-3.4186908 -2.9677712 -0.9541519
-3.5804087 -3.3893455 -0.9533365
-3.6211404 -3.4471355 -0.9521135
-3.4133057 -2.8753737 -0.9516421
-3.6567713 -3.4921307 -0.9516365
-3.7849546 -3.6258863 -0.9515560
-3.4403781 -3.0919018 -0.9509225
-3.4668896 -3.1752533 -0.9490404
-3.5479085 -3.3411365 -0.9479524
-3.4192542 -3.0055002 -0.9477559
-3.4952100 -3.2432882 -0.9473363
-3.4100515 -2.9423988 -0.9453122
-3.7124719 -3.5549549 -0.9450136
-3.6060550 -3.4292099 -0.9449894
-3.4800844 -3.2128476 -0.9443521
-3.4262438 -3.0518997 -0.9441957
-3.7584444 -3.6010486 -0.9428418
-3.6934260 -3.5350908 -0.9427071
-3.5334027 -3.3199121 -0.9423211
-3.4499295 -3.1377733 -0.9422895
-3.4057052 -2.9010730 -0.9421393
-3.4419509 -3.1144277 -0.9417225
-3.6724661 -3.5119947 -0.9411078
-3.5117526 -3.2816498 -0.9411076
-3.8178932 -3.6538220 -0.9389198
-3.8502878 -3.6795149 -0.9384014
-3.5879970 -3.4067332 -0.9380334
-3.4093286 -2.9845610 -0.9373774
-3.4020911 -2.8556130 -0.9368769
-3.6411846 -3.4765797 -0.9365766
-3.4070488 -2.8016651 -0.9365680
-3.7411059 -3.5844256 -0.9359220
-3.4270935 -3.0755426 -0.9358839
-3.4029398 -2.8305641 -0.9358613
-3.4157978 -3.0284838 -0.9357689
-3.5665911 -3.3766535 -0.9357037
-3.4540857 -3.1626448 -0.9326752
-3.4662126 -3.1937388 -0.9316874
-3.7756746 -3.6166863 -0.9310219
-3.4969350 -3.2613007 -0.9304741
-3.3978109 -2.9216438 -0.9304625
-3.7982268 -3.6365280 -0.9303332
-3.4012123 -2.9608133 -0.9302428
-3.5187057 -3.3020179 -0.9297885
-3.6204003 -3.4525741 -0.9284823
-3.3941600 -2.8802713 -0.9274864
-3.5509859 -3.3569954 -0.9267872
-3.4822018 -3.2343425 -0.9264256
-3.4283698 -3.0987935 -0.9264230
-3.4052449 -3.0063958 -0.9258294
-3.6553831 -3.4950821 -0.9256130
-3.5375168 -3.3365103 -0.9251129
-3.7236729 -3.5677233 -0.9245576
-3.4147568 -3.0574705 -0.9228252
-3.8343208 -3.6651269 -0.9222082
-3.6822473 -3.5252672 -0.9220555
-3.7036679 -3.5477094 -0.9220236
-3.5976657 -3.4251568 -0.9220139
-3.5748440 -3.3947119 -0.9204364
-3.4359916 -3.1310837 -0.9201802
-3.7579691 -3.6002319 -0.9180455
-3.3886421 -2.8217301 -0.9180304
-3.8676867 -3.6893201 -0.9178851
-3.3933232 -2.7821332 -0.9174200
-3.5038811 -3.2839464 -0.9172811
-3.4686455 -3.2145754 -0.9171211
-3.3900669 -2.9434231 -0.9169459
-3.3863786 -2.9005298 -0.9164594
-3.3952125 -2.9847229 -0.9161398
-3.8147325 -3.6488625 -0.9149611
-3.3846946 -2.8514468 -0.9147940
-3.5230880 -3.3195050 -0.9133348
-3.4524314 -3.1818275 -0.9132900
-3.6351176 -3.4736969 -0.9130523
-3.4020405 -3.0316179 -0.9125062
-3.4154813 -3.0823357 -0.9123185
-3.4406147 -3.1544470 -0.9117458
-3.5601554 -3.3775569 -0.9111406
-3.4853001 -3.2540934 -0.9102826
-3.7859461 -3.6245647 -0.9098785
-3.6667527 -3.5097154 -0.9094523
-3.7406835 -3.5842902 -0.9090258
-3.3781022 -2.8754490 -0.9063827
-3.3804190 -2.9220520 -0.9060592
-3.4206606 -3.1093810 -0.9054682
-3.6104560 -3.4457479 -0.9053956
-3.5404289 -3.3512701 -0.9041721
-3.3787308 -2.8029173 -0.9038527
-3.3841486 -2.9662610 -0.9035500
-3.8498694 -3.6738462 -0.9033440
-3.5860815 -3.4156081 -0.9027927
-3.3903845 -3.0062321 -0.9020452
-3.7153097 -3.5603876 -0.9016869
-3.4027802 -3.0585837 -0.9016122
-3.4720270 -3.2349302 -0.9016057
-3.6939980 -3.5389218 -0.9012194
-3.5084425 -3.3017740 -0.9009211
-3.6498037 -3.4924653 -0.8994146
-3.8850211 -3.6978011 -0.8993853
-3.4263529 -3.1353612 -0.8979083
-3.4549524 -3.2029715 -0.8977974
-3.3711441 -2.8353277 -0.8969828
-3.3720206 -2.9002062 -0.8964314
-3.7704394 -3.6102466 -0.8958878
-3.8297363 -3.6580244 -0.8958383
-3.4921690 -3.2770941 -0.8955128
-3.5705380 -3.3975351 -0.8953710
-3.3750654 -2.9436213 -0.8947501
-3.8022274 -3.6362139 -0.8936493
-3.5254558 -3.3334225 -0.8930023
-3.4370290 -3.1687116 -0.8922517
-3.6254038 -3.4660459 -0.8918516
-3.3749098 -2.7545413 -0.8917795
-3.3898744 -3.0334203 -0.8913120
-3.4073115 -3.0927727 -0.8905062
-3.6762317 -3.5217374 -0.8893807
-3.3788125 -2.9886273 -0.8893329
-3.5966270 -3.4326048 -0.8887062
-3.5490173 -3.3701564 -0.8882155
-3.7311896 -3.5751982 -0.8879368
-3.3637474 -2.8624503 -0.8876873
-3.4768456 -3.2547152 -0.8872347
-3.7530953 -3.5948427 -0.8871419
-3.3660811 -2.7887762 -0.8870920
-3.8667069 -3.6830971 -0.8870640
-3.3603909 -2.8165896 -0.8837885
-3.4118798 -3.1172494 -0.8829095
-3.4593537 -3.2251954 -0.8828933
-3.3641122 -2.9225074 -0.8824377
-3.3696782 -2.9643566 -0.8820320
-3.9031205 -3.7056574 -0.8817655
-3.7035460 -3.5491388 -0.8806150
-3.6599766 -3.5055317 -0.8803822
-3.3946609 -3.0720561 -0.8802248
-3.3782956 -3.0120754 -0.8799991
-3.5114599 -3.3180988 -0.8798181
-3.4408823 -3.1898421 -0.8795062
-3.8455762 -3.6665874 -0.8792588
-3.5799475 -3.4140649 -0.8789704
-3.7856176 -3.6213216 -0.8789234
-3.3582350 -2.8868125 -0.8785436
-3.6110451 -3.4516807 -0.8783068
-3.6401173 -3.4842169 -0.8780825
-3.4981550 -3.2978614 -0.8774163
-3.5346013 -3.3537124 -0.8771094
-3.8190168 -3.6469750 -0.8768258
-3.4206946 -3.1470203 -0.8766100
-3.5595391 -3.3889400 -0.8743233
-3.3527286 -2.8411826 -0.8729683
-3.4827747 -3.2748231 -0.8725986
-3.3833138 -3.0478840 -0.8725540
-3.6876273 -3.5339045 -0.8700134
-3.8840076 -3.6906306 -0.8696363
-3.3993595 -3.1014699 -0.8692276
-3.3657187 -2.9874520 -0.8686031
-3.3500924 -2.7913653 -0.8684927
-3.3578679 -2.9463241 -0.8682519
-3.4276506 -3.1722694 -0.8681039
-3.3484865 -2.8665453 -0.8677632
-3.7686957 -3.6064332 -0.8674578
-3.7197422 -3.5641214 -0.8674181
-3.4641132 -3.2459157 -0.8668013
-3.7437099 -3.5852569 -0.8663446
-3.5197224 -3.3365768 -0.8663422
-3.4461336 -3.2125139 -0.8657867
-3.3509484 -2.9107687 -0.8657172
-3.5966092 -3.4373569 -0.8647420
-3.9211908 -3.7121004 -0.8638169
-3.8020188 -3.6322382 -0.8634058
-3.8640037 -3.6760177 -0.8633648
-3.6244800 -3.4689424 -0.8630585
-3.5441392 -3.3722197 -0.8624162
-3.6695416 -3.5167357 -0.8607680
-3.4036385 -3.1243462 -0.8604566
-3.3711086 -3.0293088 -0.8601649
-3.8348384 -3.6555021 -0.8592997
-3.3822928 -3.0685518 -0.8590931
-3.3449943 -2.7628760 -0.8588109
-3.3406057 -2.8182676 -0.8579331
-3.5025807 -3.3142001 -0.8571777
-3.3430345 -2.8894001 -0.8571383
-3.6503150 -3.4970881 -0.8570268
-3.5710649 -3.4082050 -0.8569517
-3.4325699 -3.1937779 -0.8559350
-3.7022119 -3.5477615 -0.8550090
-3.4144126 -3.1559103 -0.8548964
-3.3530898 -2.9679770 -0.8548145
-3.3615561 -3.0078034 -0.8538906
-3.3375448 -2.8480876 -0.8530942
-3.4880707 -3.2942880 -0.8526996
-3.9026110 -3.6981825 -0.8525816
-3.4702930 -3.2657080 -0.8520872
-3.3443184 -2.9301256 -0.8516446
-3.5553695 -3.3902690 -0.8496010
-3.3863160 -3.0938078 -0.8494449
-3.6099135 -3.4547536 -0.8494063
-3.7843648 -3.6167969 -0.8489227
-3.9408366 -3.7189605 -0.8488923
-3.5290266 -3.3563925 -0.8487235
-3.7570139 -3.5948483 -0.8480707
-3.4503646 -3.2336256 -0.8480029
-3.7316866 -3.5739191 -0.8476678
-3.3326825 -2.7966144 -0.8469413
-3.8195118 -3.6420110 -0.8459984
-3.3695306 -3.0511683 -0.8451809
-3.8816403 -3.6831693 -0.8442681
-3.6850436 -3.5315856 -0.8441550
-3.5844477 -3.4271524 -0.8432174
-3.8532780 -3.6645516 -0.8431115
-3.6340426 -3.4813083 -0.8429523
-3.3324679 -2.7444014 -0.8425769
-3.5113384 -3.3336859 -0.8416968
-3.3304206 -2.8713533 -0.8414262
-3.3494186 -2.9888860 -0.8411763
-3.4175529 -3.1763744 -0.8406743
-3.3333931 -2.9056497 -0.8405636
-3.3902757 -3.1159436 -0.8398197
-3.3406567 -2.9529986 -0.8396570
-3.4360474 -3.2133535 -0.8392868
-3.6613287 -3.5089394 -0.8389149
-3.4001842 -3.1407653 -0.8382196
-3.3255317 -2.8294788 -0.8382175
-3.3583207 -3.0282341 -0.8378099
-3.5404835 -3.3746048 -0.8372310
-3.3733512 -3.0760765 -0.8364307
-3.9234331 -3.7053028 -0.8355194
-3.3234693 -2.7678031 -0.8340584
-3.7148785 -3.5583996 -0.8337447
-3.8032451 -3.6282724 -0.8336974
-3.4917902 -3.3088491 -0.8333358
-3.4563076 -3.2529818 -0.8329362
-3.4747590 -3.2833003 -0.8326623
-3.5685909 -3.4102236 -0.8323733
-3.3303166 -2.9290135 -0.8302034
-3.9581863 -3.7220338 -0.8297795
-3.5985250 -3.4445873 -0.8296256
-3.8382229 -3.6514377 -0.8289416
-3.7727493 -3.6047995 -0.8286288
-3.6185133 -3.4663075 -0.8283304
-3.7454404 -3.5835025 -0.8283112
-3.9037536 -3.6919834 -0.8281362
-3.3186692 -2.8542372 -0.8278083
-3.3166616 -2.7959925 -0.8271268
-3.4223551 -3.1967051 -0.8268889
-3.4041551 -3.1615420 -0.8255156
-3.3210393 -2.8910053 -0.8251355
-3.3768953 -3.1002516 -0.8250990
-3.5195278 -3.3505383 -0.8250371
-3.6967554 -3.5419184 -0.8248345
-3.8702867 -3.6709064 -0.8241268
-3.3448102 -3.0082421 -0.8239559
-3.3600683 -3.0573000 -0.8236456
-3.6458550 -3.4946874 -0.8236277
-3.3358888 -2.9753067 -0.8236211
-3.5514901 -3.3917393 -0.8223822
-3.4413507 -3.2341056 -0.8220710
-3.6752231 -3.5224516 -0.8217562
-3.5025888 -3.3295684 -0.8187406
-3.3851786 -3.1268656 -0.8185561
-3.3099474 -2.8195449 -0.8184584
-3.5823614 -3.4283068 -0.8180365
-3.3123811 -2.7459649 -0.8179948
-3.9406334 -3.7089795 -0.8175381
-3.3260050 -2.9520724 -0.8163841
-3.9820240 -3.7287461 -0.8160677
-3.8211736 -3.6371426 -0.8157152
-3.3467285 -3.0307804 -0.8149854
-3.7922597 -3.6170715 -0.8143719
-3.7270028 -3.5669200 -0.8141019
-3.4607385 -3.2702266 -0.8136880
-3.5323701 -3.3703887 -0.8132548
-3.3162459 -2.9144668 -0.8125359
-3.4788099 -3.2977308 -0.8123550
-3.3639812 -3.0835771 -0.8120512
-3.3043587 -2.7790874 -0.8113192
-3.3086357 -2.8703924 -0.8108987
-3.4276048 -3.2172413 -0.8108611
-3.8913012 -3.6798582 -0.8105864
-3.6312882 -3.4805508 -0.8100506
-3.3054547 -2.8434227 -0.8098156
-3.4093747 -3.1850647 -0.8095900
-3.7613073 -3.5935057 -0.8092198
-3.9203760 -3.6955267 -0.8089708
-3.6058158 -3.4546751 -0.8080124
-3.5664312 -3.4119482 -0.8076949
-3.6594779 -3.5078899 -0.8076051
-3.8556893 -3.6577950 -0.8073449
-3.3913353 -3.1514805 -0.8065757
-3.3317850 -2.9978254 -0.8062630
-3.9620989 -3.7149812 -0.8042212
-3.4464414 -3.2524198 -0.8040088
-3.7082125 -3.5505088 -0.8036401
-3.6867889 -3.5322000 -0.8020223
-3.3219387 -2.9721076 -0.8013854
-3.5106172 -3.3457123 -0.8013563
-3.3484951 -3.0567923 -0.8012206
-3.2965477 -2.8000484 -0.8010876
-3.3711768 -3.1132028 -0.8009718
-3.3047443 -2.8922572 -0.8005071
-3.7439918 -3.5791760 -0.7999996
-3.5440365 -3.3873727 -0.7995799
-3.3123295 -2.9366947 -0.7994627
-3.2958895 -2.7422573 -0.7986012
-3.4891317 -3.3181964 -0.7982269
-4.0013225 -3.7304554 -0.7972222
-3.3336461 -3.0203199 -0.7969833
-3.8363544 -3.6429115 -0.7967202
-3.2941438 -2.8266768 -0.7963593
-3.8117876 -3.6264964 -0.7949900
-3.4143329 -3.2048185 -0.7939826
-3.7803986 -3.6047579 -0.7939772
-3.5811755 -3.4300514 -0.7935730
-3.4648155 -3.2854496 -0.7935122
-3.2954329 -2.8590640 -0.7934978
-3.8777473 -3.6671616 -0.7932854
-3.3958567 -3.1716653 -0.7929708
-3.4322415 -3.2357778 -0.7926584
-3.9412887 -3.7008234 -0.7925421
-3.6186192 -3.4687050 -0.7925135
-3.3770667 -3.1348620 -0.7916126
-3.6447470 -3.4940404 -0.7915373
-3.2952881 -2.6875614 -0.7909778
-3.9088129 -3.6835658 -0.7904654
-3.5243646 -3.3658566 -0.7900438
-3.3522149 -3.0799946 -0.7896730
-3.6712068 -3.5178989 -0.7879808
-3.3006416 -2.9154458 -0.7879202
-3.7272112 -3.5643091 -0.7876590
-3.2857491 -2.7668700 -0.7872552
-3.9801309 -3.7170734 -0.7871184
-3.3091278 -2.9592536 -0.7852721
-3.2865287 -2.7183936 -0.7847605
-4.0217574 -3.7333213 -0.7844448
-3.5562553 -3.4037328 -0.7843585
-3.3194178 -2.9966612 -0.7841265
-3.6004040 -3.4507148 -0.7838437
-3.4500147 -3.2675620 -0.7838018
-3.8558103 -3.6516135 -0.7837746
-3.3350806 -3.0438471 -0.7835632
-3.7627351 -3.5904593 -0.7832665
-3.4756267 -3.3047493 -0.7831231
-3.2819591 -2.7946032 -0.7821381
-3.6996209 -3.5416032 -0.7820032
-3.3574424 -3.1027033 -0.7809388
-3.4997000 -3.3373720 -0.7805088
-3.2898146 -2.8845741 -0.7796486
-3.2829135 -2.8438379 -0.7784734
-3.9601062 -3.7041650 -0.7770196
-3.4002859 -3.1908614 -0.7767644
-3.7962406 -3.6123048 -0.7766570
-3.2793386 -2.8192992 -0.7764455
-3.2776064 -2.7400390 -0.7763884
-3.3815224 -3.1567856 -0.7760963
-3.8940299 -3.6709090 -0.7754519
-3.2976231 -2.9386226 -0.7749325
-3.8275347 -3.6319220 -0.7749291
-3.7444282 -3.5757583 -0.7746936
-3.4189912 -3.2236008 -0.7746927
-3.9291851 -3.6885945 -0.7745936
-3.3225587 -3.0223242 -0.7744939
-3.5393294 -3.3863465 -0.7740921
-3.6309589 -3.4809513 -0.7734450
-3.3381733 -3.0660888 -0.7723745
-4.0028454 -3.7205588 -0.7723387
-3.6573416 -3.5050255 -0.7716556
-4.0426816 -3.7357051 -0.7716426
-3.5702581 -3.4203771 -0.7716080
-3.4343715 -3.2495798 -0.7705624
-3.5130400 -3.3557632 -0.7704924
-3.3644529 -3.1277367 -0.7695890
-3.3063117 -2.9816108 -0.7689991
-3.6827630 -3.5264919 -0.7683552
-3.2703457 -2.7641202 -0.7677197
-3.4851709 -3.3220858 -0.7675391
-3.2867515 -2.9098548 -0.7675153
-3.4618816 -3.2909162 -0.7675094
-3.8745053 -3.6576612 -0.7674516
-3.6127931 -3.4637954 -0.7673476
-3.7152257 -3.5523975 -0.7664313
-3.2772237 -2.8653527 -0.7656392
-3.5869118 -3.4381980 -0.7654869
-3.7797474 -3.5986476 -0.7648073
-3.8492125 -3.6419030 -0.7624728
-3.3436638 -3.0901230 -0.7620318
-3.9838079 -3.7086297 -0.7620106
-3.2674908 -2.8011659 -0.7619961
-3.2952130 -2.9604230 -0.7607595
-3.3093769 -3.0057027 -0.7602616
-3.3247664 -3.0479791 -0.7598304
-3.3869284 -3.1782126 -0.7595482
-3.9126098 -3.6753045 -0.7594301
-4.0242191 -3.7233596 -0.7591798
-3.4447950 -3.2704546 -0.7586730
-3.9479204 -3.6917288 -0.7586404
-3.7605714 -3.5842424 -0.7584299
-3.5527559 -3.4030199 -0.7582795
-3.8132163 -3.6190178 -0.7579206
-3.4046188 -3.2092804 -0.7578524
-3.2680668 -2.8403011 -0.7575603
-3.3695673 -3.1485183 -0.7562925
-3.2755711 -2.8903842 -0.7562797
-3.5253601 -3.3729013 -0.7559294
-4.0644233 -3.7352409 -0.7558196
-3.7341585 -3.5648355 -0.7547430
-3.6442512 -3.4924973 -0.7546741
-3.4983219 -3.3415854 -0.7542444
-3.2846858 -2.9371097 -0.7538399
-3.6997284 -3.5386573 -0.7529578
-3.2589129 -2.7410185 -0.7528674
-3.4212867 -3.2376953 -0.7528237
-3.3505135 -3.1144655 -0.7517214
-3.4718816 -3.3092301 -0.7516580
-3.8917398 -3.6617587 -0.7506313
-3.6678427 -3.5127237 -0.7504718
-3.3122220 -3.0299539 -0.7494404
-3.3304407 -3.0738269 -0.7491528
-3.2564801 -2.7787079 -0.7489742
-3.5991282 -3.4508059 -0.7481743
-3.2949555 -2.9846868 -0.7470677
-3.2560365 -2.7131953 -0.7466430
-3.8354038 -3.6293961 -0.7466297
-3.5751759 -3.4275453 -0.7464454
-3.6272750 -3.4770808 -0.7458427
-3.2741364 -2.9148130 -0.7455691
-3.7939766 -3.6037430 -0.7454598
-4.0061621 -3.7105282 -0.7454072
-4.0440272 -3.7232845 -0.7446610
-3.2562065 -2.8145741 -0.7445810
-3.8653321 -3.6457078 -0.7443593
-3.2634917 -2.8689599 -0.7438467
-3.9716476 -3.6960878 -0.7436553
-3.9335999 -3.6794613 -0.7430424
-4.0869780 -3.7353868 -0.7430216
-3.4314745 -3.2579211 -0.7413121
-3.3915528 -3.1966412 -0.7412346
-3.4559586 -3.2912206 -0.7411892
-3.2558013 -2.6552146 -0.7403894
-3.5387548 -3.3899704 -0.7403604
-3.3736745 -3.1667140 -0.7403472
-3.5121567 -3.3607123 -0.7392281
-3.4839359 -3.3273636 -0.7391609
-3.7181330 -3.5506198 -0.7390344
-3.2829298 -2.9606594 -0.7390114
-3.3556872 -3.1352762 -0.7381077
-3.3360428 -3.0967383 -0.7377594
-3.2548487 -2.8430897 -0.7372757
-3.3173147 -3.0562907 -0.7369280
-3.4078060 -3.2245016 -0.7364541
-3.7501572 -3.5728477 -0.7362917
-3.2986493 -3.0106426 -0.7362672
-3.6850929 -3.5254258 -0.7359597
-3.7739003 -3.5886084 -0.7359578
-3.9118552 -3.6665501 -0.7358239
-3.5594378 -3.4119971 -0.7353333
-3.2620187 -2.8914324 -0.7343866
-3.2444812 -2.7331449 -0.7341469
-4.0655037 -3.7241541 -0.7331268
-3.2438205 -2.7592385 -0.7329754
-3.2456076 -2.7932011 -0.7324427
-3.8198589 -3.6160570 -0.7313987
-3.2716624 -2.9372871 -0.7308905
-3.6512290 -3.4971404 -0.7307968
-3.6115207 -3.4623300 -0.7301314
-4.0267495 -3.7104894 -0.7295715
-3.8857053 -3.6511021 -0.7280276
-3.9908825 -3.6971498 -0.7279882
-3.9572650 -3.6838392 -0.7279097
-3.8520375 -3.6334076 -0.7278983
-3.5862707 -3.4388112 -0.7273076
-3.3029536 -3.0329528 -0.7270434
-3.4672296 -3.3097340 -0.7260179
-4.1095279 -3.7320318 -0.7259133
-3.2406818 -2.6733016 -0.7256188
-3.4965731 -3.3450086 -0.7252605
-3.2435290 -2.8228244 -0.7251634
-3.4426255 -3.2788011 -0.7242161
-3.2841313 -2.9880624 -0.7239633
-3.3412263 -3.1183729 -0.7239376
-3.2615595 -2.9159510 -0.7238748
-3.5238695 -3.3755183 -0.7237995
-3.3208358 -3.0773058 -0.7235191
-3.7028941 -3.5370181 -0.7232673
-3.2494489 -2.8649021 -0.7232112
-3.4179995 -3.2453396 -0.7228814
-3.3779650 -3.1840626 -0.7225237
-3.6693924 -3.5113124 -0.7221879
-3.6301159 -3.4784831 -0.7215483
-3.3609399 -3.1563800 -0.7213088
-3.2359876 -2.6908664 -0.7209725
-3.8026161 -3.6027535 -0.7204630
-3.9314014 -3.6696238 -0.7204241
-3.7359542 -3.5598088 -0.7201771
-3.3932948 -3.2098066 -0.7199637
-4.0488345 -3.7115691 -0.7177418
-4.0868200 -3.7213654 -0.7164407
-3.5476578 -3.4012589 -0.7164400
-3.2305056 -2.7252174 -0.7159583
-3.5706515 -3.4239644 -0.7158074
-3.3065623 -3.0547258 -0.7151589
-3.2697197 -2.9598795 -0.7149524
-3.2317302 -2.7770818 -0.7148769
-3.7655066 -3.5784549 -0.7146624
-3.4812651 -3.3292432 -0.7143436
-3.2866109 -3.0102638 -0.7135580
-3.2331791 -2.8031585 -0.7135144
-3.3271485 -3.0991517 -0.7133524
-3.2289310 -2.7527630 -0.7132188
-3.9051112 -3.6550982 -0.7130166
-4.0104184 -3.6972434 -0.7129772
-4.1299942 -3.7290122 -0.7129049
-3.2475522 -2.8871974 -0.7124639
-3.2384543 -2.8437153 -0.7120451
-3.8722792 -3.6385808 -0.7118389
-3.8364720 -3.6198083 -0.7116730
-3.9751006 -3.6836332 -0.7107937
-3.6004571 -3.4517667 -0.7100820
-3.5080218 -3.3599909 -0.7099637
-3.2298292 -2.6447639 -0.7095615
-3.2589539 -2.9373580 -0.7087686
-3.4544254 -3.2980241 -0.7084991
-3.3464340 -3.1389202 -0.7079002
-3.4282629 -3.2644323 -0.7078569
-3.4037276 -3.2305067 -0.7074733
-3.7190763 -3.5457236 -0.7072453
-3.6874354 -3.5228712 -0.7060817
-3.7864580 -3.5892531 -0.7058514
-3.9535951 -3.6732071 -0.7058450
-3.6447477 -3.4898116 -0.7058022
-4.0682232 -3.7094493 -0.7029979
-3.5319900 -3.3859390 -0.7028754
-3.3649678 -3.1732497 -0.7028155
-3.2195770 -2.7043440 -0.7027724
-3.2712696 -2.9820172 -0.7025390
-3.2913912 -3.0334123 -0.7024556
-3.2491024 -2.9159559 -0.7023479
-3.6189254 -3.4676241 -0.7015607
-4.1069008 -3.7177147 -0.7014967
-4.0318495 -3.6984375 -0.7013285
-3.3806829 -3.1993934 -0.7007312
-3.2184277 -2.6779049 -0.7002341
-3.3092170 -3.0741110 -0.7000849
-4.1579112 -3.7260911 -0.7000787
-3.8170352 -3.6054814 -0.6994695
-3.2355987 -2.8693292 -0.6994436
-3.3327980 -3.1207548 -0.6982961
-3.5831007 -3.4357871 -0.6982120
-3.2258962 -2.8244395 -0.6979694
-3.7494494 -3.5641513 -0.6978600
-3.6677253 -3.5069206 -0.6974513
-3.2159140 -2.7349979 -0.6972190
-3.9330919 -3.6612902 -0.6970833
-3.4684694 -3.3172555 -0.6965299
-3.2195553 -2.7877164 -0.6964982
-3.9974380 -3.6850553 -0.6960652
-3.8566090 -3.6254379 -0.6957358
-3.4393367 -3.2825863 -0.6951077
-3.5605916 -3.4147837 -0.6945394
-3.2155035 -2.7605488 -0.6941617
-3.4898276 -3.3417665 -0.6939916
-3.8938795 -3.6425748 -0.6936273
-3.2583510 -2.9603704 -0.6934406
-3.2748668 -3.0046835 -0.6922145
-4.1363539 -3.7178303 -0.6921631
-3.4134891 -3.2494862 -0.6920779
-3.2358186 -2.8919618 -0.6905128
-3.3190949 -3.1011279 -0.6902928
-3.3505584 -3.1566559 -0.6900819
-3.2244796 -2.8473328 -0.6893938
-3.7058194 -3.5330106 -0.6887039
-3.7715660 -3.5758259 -0.6883748
-3.9724572 -3.6725412 -0.6881117
-3.2957695 -3.0572149 -0.6876369
-3.3905248 -3.2191494 -0.6873585
-3.5143604 -3.3689444 -0.6868573
-3.8380535 -3.6127792 -0.6864561
-3.6046214 -3.4544099 -0.6862765
-4.0522283 -3.6962965 -0.6859100
-4.1791490 -3.7197751 -0.6857097
-4.0894930 -3.7050534 -0.6856817
-3.7323695 -3.5501375 -0.6847905
-3.2453212 -2.9354615 -0.6847573
-3.7995221 -3.5912255 -0.6846480
-3.6368440 -3.4809790 -0.6845643
-3.9157873 -3.6485500 -0.6838217
-3.2056460 -2.6617189 -0.6836812
-3.5432521 -3.3981369 -0.6835762
-3.2136265 -2.8078237 -0.6834037
-3.2044964 -2.7165610 -0.6829145
-4.0231502 -3.6861759 -0.6819870
-3.4542155 -3.3032565 -0.6818248
-3.2801440 -3.0301697 -0.6805501
-3.3672451 -3.1878330 -0.6802278
-3.2017705 -2.6888417 -0.6797159
-3.6867831 -3.5180535 -0.6794488
-3.8775090 -3.6297551 -0.6792824
-4.1154808 -3.7064518 -0.6792762
-3.9502093 -3.6603210 -0.6790737
-3.4252735 -3.2683231 -0.6790180
-3.2599241 -2.9844538 -0.6788940
-3.3344943 -3.1362525 -0.6788637
-3.2347020 -2.9136929 -0.6782364
-3.2231466 -2.8722405 -0.6777168
-4.1563326 -3.7119383 -0.6775372
-3.6565248 -3.4954873 -0.6770390
-3.2055914 -2.7822534 -0.6767838
-3.4772143 -3.3301831 -0.6767020
-3.3029207 -3.0807985 -0.6765445
-3.2003287 -2.7464841 -0.6750810
-3.5758923 -3.4285593 -0.6745443
-4.2046364 -3.7139727 -0.6743444
-4.0025684 -3.6756904 -0.6737280
-3.2116964 -2.8331642 -0.6736611
-3.8202400 -3.5992093 -0.6733502
-3.7571740 -3.5632223 -0.6731896
-3.4006964 -3.2383306 -0.6722221
-3.4989410 -3.3539592 -0.6721848
-3.2465453 -2.9581352 -0.6719574
-3.8578531 -3.6175506 -0.6710521
-3.4385863 -3.2867724 -0.6702011
-3.2660521 -3.0097530 -0.6699541
-3.5261442 -3.3818432 -0.6699395
-3.3200558 -3.1169251 -0.6694994
-3.9005466 -3.6363700 -0.6693967
-3.6210490 -3.4666646 -0.6691493
-4.0713381 -3.6917328 -0.6688590
-3.1950770 -2.6386334 -0.6687738
-3.3775824 -3.2076342 -0.6686084
-3.3524731 -3.1705130 -0.6681062
-3.5586307 -3.4126958 -0.6677886
-3.7874833 -3.5789814 -0.6659630
-3.9808600 -3.6650318 -0.6655734
-3.5954629 -3.4453233 -0.6655557
-3.2221460 -2.8959215 -0.6650710
-3.2889287 -3.0627117 -0.6649672
-3.7197505 -3.5375268 -0.6649039
-3.1901939 -2.6693638 -0.6645019
-3.9324647 -3.6472337 -0.6643984
-4.0430593 -3.6822739 -0.6638805
-4.0996821 -3.6945691 -0.6637874
-4.1836657 -3.7057895 -0.6635925
-3.1993015 -2.8031046 -0.6630726
-3.2337453 -2.9356128 -0.6630228
-4.1342731 -3.6995662 -0.6628804
-3.1889411 -2.7097634 -0.6625007
-3.4629372 -3.3161827 -0.6621086
-3.6750600 -3.5064169 -0.6610937
-3.2085906 -2.8542900 -0.6610646
-3.6425384 -3.4827751 -0.6608038
-3.1922663 -2.7669364 -0.6602594
-3.4131128 -3.2580021 -0.6587241
-3.2756432 -3.0409605 -0.6586331
-3.3056965 -3.0989490 -0.6582982
-3.5421387 -3.3973283 -0.6582044
-3.6980239 -3.5216013 -0.6581253
-3.3367635 -3.1509604 -0.6577730
-3.7422220 -3.5499856 -0.6574216
-3.2475440 -2.9794270 -0.6573247
-4.1589008 -3.6988256 -0.6571266
-3.9573598 -3.6529449 -0.6567082
-3.8404054 -3.6037790 -0.6566852
-3.4851344 -3.3410222 -0.6561002
-3.8837536 -3.6237935 -0.6560905
-4.0228463 -3.6719286 -0.6548035
-3.1852850 -2.7392884 -0.6546970
-3.3610331 -3.1889980 -0.6546022
-3.3867316 -3.2249085 -0.6541423
-3.8079503 -3.5864478 -0.6538771
-3.5122477 -3.3685088 -0.6532405
-3.1978896 -2.8302897 -0.6522690
-3.1821805 -2.6228437 -0.6515971
-3.2096322 -2.8792499 -0.6515649
-3.2212286 -2.9174831 -0.6508312
-3.1795252 -2.6519683 -0.6506322
-3.5743285 -3.4259490 -0.6501602
-3.4477430 -3.3007374 -0.6501560
-3.7679967 -3.5633110 -0.6501535
-3.4274377 -3.2773476 -0.6497972
-3.9165129 -3.6347639 -0.6494676
-4.1182201 -3.6883673 -0.6483222
-3.3218365 -3.1321081 -0.6483089
-3.2343956 -2.9582076 -0.6480010
-4.0682242 -3.6791771 -0.6477425
-3.9988760 -3.6616027 -0.6474463
-3.2589626 -3.0165473 -0.6473926
-3.1866016 -2.7892294 -0.6473433
-3.6111485 -3.4562752 -0.6469490
-3.8631988 -3.6112262 -0.6467783
-3.1766876 -2.6959621 -0.6465908
-3.6591761 -3.4923027 -0.6455279
-3.2877452 -3.0762639 -0.6442505
-3.3456933 -3.1707487 -0.6441582
-4.1828101 -3.6912150 -0.6429803
-4.0456502 -3.6709935 -0.6423733
-3.6308176 -3.4709531 -0.6422402
-3.9419236 -3.6408710 -0.6419439
-3.7269423 -3.5364467 -0.6417364
-3.1742422 -2.7195854 -0.6415417
-4.0917064 -3.6801374 -0.6415196
-3.1780019 -2.7592327 -0.6415196
-3.5276293 -3.3837981 -0.6412035
-3.9774740 -3.6519954 -0.6410975
-3.7910264 -3.5732186 -0.6407292
-3.4712165 -3.3275564 -0.6406636
-3.3988936 -3.2448158 -0.6404755
-4.1413118 -3.6860941 -0.6404696
-3.5561750 -3.4095638 -0.6402197
-3.5921527 -3.4404416 -0.6401211
-3.1962723 -2.8549925 -0.6396189
-3.3718306 -3.2094984 -0.6394019
-3.3079160 -3.1144569 -0.6390885
-3.8278079 -3.5914787 -0.6387430
-3.1696065 -2.6718984 -0.6385138
-3.6867257 -3.5100015 -0.6384909
-3.2444146 -2.9936230 -0.6378349
-3.1853395 -2.8152216 -0.6376170
-3.4968499 -3.3540812 -0.6374775
-3.2722749 -3.0530187 -0.6363703
-3.1669589 -2.6375193 -0.6354547
-3.2077282 -2.9025575 -0.6353920
-3.7075189 -3.5226480 -0.6352625
-3.7515387 -3.5496975 -0.6349844
-3.9004606 -3.6220294 -0.6344502
-3.3292909 -3.1507836 -0.6343607
-3.2202179 -2.9387562 -0.6343568
-4.0186204 -3.6589138 -0.6317811
-3.4150293 -3.2659577 -0.6313953
-3.1963178 -2.8771132 -0.6296031
-3.3569457 -3.1924702 -0.6288673
-3.2939415 -3.0968036 -0.6287365
-3.1667172 -2.7397488 -0.6284580
-3.4374528 -3.2922725 -0.6280847
-3.4563481 -3.3126865 -0.6279036
-3.8508963 -3.5984288 -0.6278788
-3.1722770 -2.7805659 -0.6277914
-3.8798271 -3.6107826 -0.6277774
-4.1207325 -3.6757136 -0.6276403
-3.2589629 -3.0338451 -0.6273883
-3.2294531 -2.9707340 -0.6272682
-3.8102755 -3.5786689 -0.6267838
-3.9615353 -3.6400444 -0.6266098
-3.3827501 -3.2273795 -0.6263850
-3.1610230 -2.6928274 -0.6261144
-3.9252363 -3.6277710 -0.6261101
-3.7757929 -3.5604994 -0.6257365
-3.5712813 -3.4219018 -0.6253740
-3.5143810 -3.3711097 -0.6253006
-4.0701138 -3.6663595 -0.6252754
-3.6494988 -3.4817923 -0.6245263
-3.9975542 -3.6494220 -0.6242880
-3.1601364 -2.6156850 -0.6241681
-3.4824380 -3.3403613 -0.6233160
-4.1592740 -3.6760343 -0.6232335
-3.1823490 -2.8413697 -0.6226736
-3.3135523 -3.1320392 -0.6222524
-3.6154134 -3.4563597 -0.6220857
-3.6711555 -3.4961851 -0.6220733
-3.2075235 -2.9224360 -0.6214079
-3.2771938 -3.0727159 -0.6208736
-3.2459572 -3.0132806 -0.6205448
-3.5449473 -3.3988975 -0.6203259
-3.1720284 -2.8040079 -0.6197354
-3.1552705 -2.6591030 -0.6196882
-3.3410412 -3.1738953 -0.6195399
-4.0981164 -3.6673441 -0.6194900
-4.0415472 -3.6574378 -0.6193609
-3.7263864 -3.5300399 -0.6176986
-3.1563052 -2.7172458 -0.6169450
-3.3978625 -3.2486647 -0.6154454
-3.5915068 -3.4370619 -0.6152425
-3.8319497 -3.5846719 -0.6145434
-3.6979788 -3.5118734 -0.6142199
-3.2153215 -2.9525191 -0.6135584
-3.1588101 -2.7578896 -0.6131855
-3.2993791 -3.1144946 -0.6129545
-3.2313266 -2.9904002 -0.6121048
-3.1939586 -2.8989205 -0.6115371
-3.7539283 -3.5441165 -0.6113688
-3.9069111 -3.6143434 -0.6110927
-3.3672567 -3.2114592 -0.6109382
-3.4238742 -3.2794535 -0.6107191
-3.1835626 -2.8698288 -0.6099509
-3.9469067 -3.6272276 -0.6098543
-3.4987299 -3.3565092 -0.6097720
-3.2626725 -3.0543412 -0.6095046
-3.6334221 -3.4674638 -0.6092902
-3.7941658 -3.5646188 -0.6091194
-4.0162407 -3.6460399 -0.6089519
-3.3246652 -3.1542814 -0.6088729
-3.9819569 -3.6371677 -0.6087664
-3.4676212 -3.3260304 -0.6082813
-4.1411841 -3.6650203 -0.6078998
-3.8697712 -3.5985919 -0.6077314
-3.1471071 -2.6847789 -0.6075834
-3.4463642 -3.3041355 -0.6074127
-3.5281205 -3.3833833 -0.6070910
-3.1691048 -2.8254372 -0.6068253
-3.1444135 -2.6409921 -0.6061234
-3.1595554 -2.7864039 -0.6060520
-3.2828643 -3.0919322 -0.6050969
-4.0790866 -3.6558816 -0.6050411
-3.5608674 -3.4114570 -0.6045577
-3.3513614 -3.1927058 -0.6040250
-3.1489950 -2.7372070 -0.6031349
-4.1159559 -3.6592530 -0.6031016
-3.2471629 -3.0312770 -0.6017830
-3.3817281 -3.2318389 -0.6015633
-3.6611105 -3.4848286 -0.6006491
-4.0551597 -3.6491020 -0.6002549
-3.8155175 -3.5715880 -0.5998436
-3.1968570 -2.9235432 -0.5995638
-3.6825157 -3.4984326 -0.5990851
-3.1714067 -2.8503665 -0.5990523
-3.7759194 -3.5517576 -0.5984698
-3.3083444 -3.1346097 -0.5981868
-3.6167200 -3.4536223 -0.5979629
-3.2179064 -2.9749723 -0.5979292
-3.8507194 -3.5865524 -0.5977396
-3.1370969 -2.6189327 -0.5971995
-3.4084916 -3.2639439 -0.5971230
-3.1413689 -2.7086826 -0.5970869
-3.1378164 -2.6641715 -0.5969651
-3.8915675 -3.6023283 -0.5965738
-3.7156318 -3.5179768 -0.5961221
-3.2337595 -3.0095428 -0.5960834
-3.7384283 -3.5308030 -0.5955774
-3.9286478 -3.6145514 -0.5954571
-3.2682517 -3.0733562 -0.5950524
-3.1373499 -2.5861261 -0.5949054
-3.4830233 -3.3414813 -0.5948694
-3.5796439 -3.4251069 -0.5941036
-3.1474563 -2.7666827 -0.5932248
-3.5127236 -3.3689395 -0.5929874
-3.3330804 -3.1719312 -0.5928907
-3.2032245 -2.9467611 -0.5928724
-4.0005812 -3.6335077 -0.5928626
-3.5450471 -3.3971271 -0.5918488
-3.9672970 -3.6242975 -0.5918144
-4.0324536 -3.6394519 -0.5910996
-3.1805334 -2.8926352 -0.5900532
-3.2904430 -3.1117636 -0.5895661
-3.1555029 -2.8139249 -0.5893201
-3.4324609 -3.2909088 -0.5892819
-4.1014440 -3.6475607 -0.5871428
-3.4563199 -3.3156396 -0.5868175
-3.3637917 -3.2130068 -0.5867264
-3.6430888 -3.4694528 -0.5857362
-3.2523856 -3.0518365 -0.5855743
-4.1425174 -3.6490919 -0.5854550
-3.1473416 -2.7896846 -0.5852643
-3.1308194 -2.6900652 -0.5849980
-3.5987882 -3.4382695 -0.5849363
-3.8344768 -3.5741352 -0.5840019
-3.7994715 -3.5582563 -0.5839645
-3.7611093 -3.5391441 -0.5834216
-4.0776437 -3.6422888 -0.5833199
-3.1366733 -2.7439182 -0.5832477
-3.1267226 -2.6435362 -0.5831962
-3.8718727 -3.5890265 -0.5831793
-3.3927041 -3.2479671 -0.5828459
-3.6994860 -3.5048396 -0.5827453
-3.3178608 -3.1549233 -0.5822630
-3.1676085 -2.8687774 -0.5813053
-3.1572619 -2.8368933 -0.5807008
-3.3444602 -3.1905509 -0.5806964
-3.2183893 -2.9917939 -0.5804257
-3.1275155 -2.5619475 -0.5802412
-3.5287620 -3.3825185 -0.5798566
-3.9118520 -3.6016877 -0.5795569
-3.2372130 -3.0287608 -0.5793829
-3.5631116 -3.4104771 -0.5791822
-3.1832520 -2.9141771 -0.5790667
-3.4966489 -3.3542555 -0.5784968
-3.1225602 -2.6068035 -0.5783627
-3.1297078 -2.7192433 -0.5782479
-3.2744931 -3.0926320 -0.5782463
-3.9467681 -3.6115531 -0.5780620
-3.1232912 -2.6671694 -0.5773178
-3.4168777 -3.2754227 -0.5770732
-3.6660026 -3.4825784 -0.5769356
-3.2043188 -2.9659555 -0.5765849
-3.4717595 -3.3313414 -0.5754141
-3.2999716 -3.1321218 -0.5752553
-4.0507045 -3.6329261 -0.5746518
-4.0189295 -3.6270061 -0.5741549
-3.6230383 -3.4536129 -0.5740835
-3.7273703 -3.5183082 -0.5740189
-3.9855519 -3.6192927 -0.5735980
-3.3767297 -3.2311501 -0.5734852
-3.1901091 -2.9381280 -0.5725046
-4.1192590 -3.6394015 -0.5722386
-3.1345248 -2.7689895 -0.5722013
-3.2600411 -3.0726408 -0.5721119
-3.7820175 -3.5449611 -0.5700015
-3.5834898 -3.4244540 -0.5682608
-3.1417654 -2.8081718 -0.5681640
-3.4446755 -3.3046592 -0.5675867
-3.1679081 -2.8897665 -0.5675046
-3.8573240 -3.5764785 -0.5668481
-3.8174988 -3.5601242 -0.5668001
-4.0962713 -3.6334248 -0.5664922
-3.2224704 -3.0114591 -0.5657859
-3.6872171 -3.4928407 -0.5655431
-3.1134403 -2.5869768 -0.5653540
-3.8925485 -3.5884393 -0.5652410
-3.7483481 -3.5264862 -0.5649820
-3.1123443 -2.6330784 -0.5648166
-3.1162811 -2.6894700 -0.5647583
-3.3257643 -3.1708380 -0.5646671
-3.5460546 -3.3954364 -0.5641749
-3.2839342 -3.1133230 -0.5641641
-3.1542196 -2.8570666 -0.5636224
-3.1226180 -2.7389584 -0.5629359
-3.3569924 -3.2099343 -0.5626783
-3.5142111 -3.3688643 -0.5626136
-3.2407422 -3.0460771 -0.5625598
-3.9294017 -3.5983413 -0.5619425
-3.6446074 -3.4652646 -0.5617165
-3.6064411 -3.4397798 -0.5611163
-3.3994905 -3.2582243 -0.5610659
-4.0703037 -3.6268205 -0.5606043
-3.9661914 -3.6073447 -0.5601057
-3.1089837 -2.5602478 -0.5589048
-3.2059283 -2.9846729 -0.5589012
-3.4857405 -3.3436663 -0.5588088
-3.1437667 -2.8330682 -0.5587315
-3.1156763 -2.7138257 -0.5586254
-3.3091028 -3.1506609 -0.5577367
-3.7133545 -3.5055388 -0.5576145
-4.0054135 -3.6147950 -0.5574159
-4.0359641 -3.6198116 -0.5570637
-3.1059622 -2.6083402 -0.5563475
-3.1716477 -2.9131136 -0.5560677
-3.1286049 -2.7862782 -0.5559153
-3.4270956 -3.2873685 -0.5556838
-3.1904641 -2.9556574 -0.5556804
-3.1072015 -2.6566588 -0.5554943
-3.4600738 -3.3196446 -0.5552146
-3.2658047 -3.0901634 -0.5551143
-3.5647888 -3.4084382 -0.5543282
-3.3393450 -3.1907155 -0.5532165
-3.8398177 -3.5636729 -0.5529853
-3.7689335 -3.5324396 -0.5526947
-3.8010848 -3.5474416 -0.5524367
-3.6678908 -3.4776419 -0.5520883
-3.2938171 -3.1323109 -0.5515058
-3.1197203 -2.7609521 -0.5510072
-3.3809739 -3.2392041 -0.5501218
-3.1541907 -2.8776987 -0.5492156
-3.6264192 -3.4506447 -0.5489897
-3.8768018 -3.5754557 -0.5489002
-3.2483555 -3.0663825 -0.5486699
-3.9100979 -3.5859312 -0.5482790
-3.5307629 -3.3810799 -0.5471606
-3.0977875 -2.5828807 -0.5466340
-3.2260039 -3.0304288 -0.5462817
-3.7345490 -3.5132192 -0.5460076
-4.0944751 -3.6195166 -0.5457652
-3.9479076 -3.5948935 -0.5455847
-3.1765428 -2.9355645 -0.5454835
-3.9850619 -3.6030969 -0.5445792
-3.5936071 -3.4275768 -0.5444872
-3.1015686 -2.6820057 -0.5443688
-3.2101872 -3.0040248 -0.5441100
-3.1303980 -2.8169920 -0.5440630
-3.0965755 -2.6276032 -0.5439716
-3.4117108 -3.2724745 -0.5426479
-3.1089177 -2.7354072 -0.5425860
-3.4441521 -3.3047750 -0.5422288
-3.6951355 -3.4907481 -0.5419015
-4.0605957 -3.6136661 -0.5417352
-3.5012331 -3.3563221 -0.5416853
-3.3192289 -3.1684011 -0.5413627
-3.1415290 -2.8542831 -0.5411641
-3.2776695 -3.1137103 -0.5403901
-3.3612563 -3.2187458 -0.5398717
-3.0940406 -2.5554377 -0.5397725
-3.1016381 -2.7091629 -0.5385778
-4.0174763 -3.6055823 -0.5382557
-3.1914662 -2.9731791 -0.5378910
-3.1586917 -2.9031424 -0.5373865
-3.6464453 -3.4606902 -0.5372354
-3.5497942 -3.3947845 -0.5367307
-3.3945623 -3.2552400 -0.5366304
-3.8225078 -3.5497605 -0.5365336
-3.8571711 -3.5625985 -0.5359238
-3.1153282 -2.7801256 -0.5358715
-3.4747972 -3.3329412 -0.5356128
-3.7874975 -3.5344759 -0.5349066
-3.0920186 -2.6602563 -0.5342878
-3.0871696 -2.6032242 -0.5337436
-3.7567429 -3.5198161 -0.5335445
-3.2339052 -3.0512922 -0.5331260
-3.9304101 -3.5835615 -0.5324999
-3.5746379 -3.4120912 -0.5323884
-3.2993761 -3.1457819 -0.5320291
-3.2563697 -3.0863195 -0.5320072
-3.7174759 -3.4994823 -0.5314733
-3.8970900 -3.5733076 -0.5309151
-3.3443406 -3.2009239 -0.5306246
-3.6135227 -3.4380650 -0.5303333
-3.9705528 -3.5911315 -0.5286893
-4.0822203 -3.6071877 -0.5285048
-3.6755984 -3.4757213 -0.5283174
-3.1774716 -2.9533604 -0.5280407
-3.1045269 -2.7564097 -0.5280056
-3.4287191 -3.2900760 -0.5278679
-3.1284991 -2.8374047 -0.5278149
-3.1172839 -2.8038696 -0.5277633
-3.0846162 -2.5319887 -0.5274711
-3.5199040 -3.3703856 -0.5273388
-3.3756117 -3.2361392 -0.5265266
-4.0431422 -3.6021284 -0.5264954
-3.1437372 -2.8800498 -0.5259973
-3.2148644 -3.0237410 -0.5257046
-3.1978029 -2.9948855 -0.5245882
-3.4581239 -3.3174363 -0.5243292
-3.1614896 -2.9236060 -0.5241032
-3.0892756 -2.6917389 -0.5240071
-3.9970889 -3.5933752 -0.5231255
-3.0955843 -2.7312203 -0.5227066
-3.0811647 -2.6370569 -0.5223422
-3.4917702 -3.3464839 -0.5211668
-3.3261886 -3.1816007 -0.5209617
-3.7389898 -3.5067362 -0.5208700
-3.8416822 -3.5502746 -0.5207721
-3.2847807 -3.1301912 -0.5201130
-3.8765091 -3.5614303 -0.5194627
-3.8094166 -3.5373259 -0.5191310
-3.2665597 -3.1058857 -0.5185850
-3.7004186 -3.4866702 -0.5185751
-3.1319847 -2.8600338 -0.5185187
-3.5958434 -3.4236569 -0.5184607
-3.4059551 -3.2678780 -0.5174912
-3.6355672 -3.4488701 -0.5172815
-3.2414139 -3.0704049 -0.5166805
-3.5404106 -3.3843639 -0.5161606
-3.9523085 -3.5799296 -0.5153782
-3.7746754 -3.5212582 -0.5152236
-3.6593714 -3.4624454 -0.5147076
-3.0738485 -2.6100625 -0.5145588
-3.9201280 -3.5712872 -0.5142680
-3.3097821 -3.1632589 -0.5141287
-3.1040125 -2.7851369 -0.5140587
-3.3569025 -3.2171985 -0.5140358
-4.0225977 -3.5915958 -0.5138607
-3.0774231 -2.6592989 -0.5133657
-3.1483365 -2.9053623 -0.5131861
-3.1825831 -2.9751151 -0.5131025
-3.1153834 -2.8228810 -0.5125718
-3.2228910 -3.0444143 -0.5121870
-3.5641378 -3.4009274 -0.5119670
-3.0704546 -2.5506394 -0.5111837
-4.0632063 -3.5937969 -0.5106223
-3.4428127 -3.3030484 -0.5103323
-3.4733443 -3.3300284 -0.5097735
-3.3891860 -3.2514816 -0.5096109
-3.1646571 -2.9433360 -0.5093793
-3.0701570 -2.5174951 -0.5081360
-3.5086096 -3.3590694 -0.5079868
-3.3386163 -3.1978914 -0.5071427
-3.9801992 -3.5807320 -0.5069364
-3.0821225 -2.7128421 -0.5068684
-3.8989857 -3.5618835 -0.5068302
-3.0912836 -2.7539312 -0.5067579
-3.6176676 -3.4349952 -0.5056003
-3.1999183 -3.0105423 -0.5055730
-3.4220874 -3.2837230 -0.5052862
-3.2515257 -3.0898391 -0.5047303
-3.7228692 -3.4932106 -0.5046892
-3.0750296 -2.6855726 -0.5041695
-3.6822648 -3.4719878 -0.5038364
-3.1351800 -2.8852501 -0.5037157
-3.2940878 -3.1464956 -0.5034448
-3.8607033 -3.5482096 -0.5025840
-3.0665983 -2.6305920 -0.5024098
-3.8283655 -3.5369775 -0.5018026
-3.3722247 -3.2346652 -0.5012714
-3.7950606 -3.5240608 -0.5008771
-3.7559076 -3.5073154 -0.5008585
-3.1186669 -2.8488737 -0.5003696
-3.0612197 -2.5859835 -0.4999431
-4.0434457 -3.5847645 -0.4994726
-3.5854646 -3.4126157 -0.4993711
-3.1510021 -2.9249260 -0.4982470
-3.9399974 -3.5673984 -0.4982374
-3.2707606 -3.1184498 -0.4977446
-3.0617115 -2.5224441 -0.4974503
-3.3209451 -3.1797341 -0.4971282
-3.5275409 -3.3719872 -0.4970925
-3.4918962 -3.3442424 -0.4968430
-3.1004829 -2.8050888 -0.4961078
-3.2305602 -3.0634047 -0.4958793
-3.6488304 -3.4509303 -0.4955911
-4.0041479 -3.5774345 -0.4953213
-3.2092386 -3.0316496 -0.4947130
-3.1844936 -2.9909368 -0.4943400
-3.1700225 -2.9649809 -0.4942366
-3.0907427 -2.7789137 -0.4938797
-3.0633489 -2.6557280 -0.4937607
-4.0771346 -3.5828664 -0.4936910
-3.0562749 -2.5611603 -0.4927892
-3.7053012 -3.4804157 -0.4926477
-3.5528912 -3.3894890 -0.4925919
-3.0789191 -2.7385439 -0.4922363
-3.4570495 -3.3147964 -0.4919458
-3.9640569 -3.5687844 -0.4917414
-3.4048998 -3.2674437 -0.4913292
-3.1062687 -2.8302472 -0.4898752
-3.8843218 -3.5490105 -0.4897442
-3.3557894 -3.2185637 -0.4895230
-3.9173428 -3.5572604 -0.4891327
-3.3049195 -3.1624894 -0.4887617
-3.1365490 -2.9045803 -0.4875060
-3.7764751 -3.5106125 -0.4867347
-3.0681817 -2.7088956 -0.4863280
-3.4344680 -3.2945067 -0.4862850
-3.1216697 -2.8733148 -0.4858408
-3.6047969 -3.4221376 -0.4858322
-3.8464669 -3.5351608 -0.4848484
-3.7402979 -3.4941114 -0.4848426
-3.3879057 -3.2510741 -0.4846983
-3.0522315 -2.6098146 -0.4846678
-3.1561907 -2.9465473 -0.4844142
-3.0612222 -2.6822607 -0.4841627
-3.2556850 -3.1024568 -0.4840332
-4.0283405 -3.5728850 -0.4837084
-3.6737506 -3.4611535 -0.4836510
-3.8139243 -3.5233773 -0.4830835
-3.3355202 -3.1977187 -0.4830065
-3.0483470 -2.5364543 -0.4827809
-3.6300260 -3.4364943 -0.4827442
-3.2401766 -3.0818005 -0.4825656
-3.2824958 -3.1368073 -0.4824840
-3.5109730 -3.3571424 -0.4819499
-3.5725978 -3.4003288 -0.4816706
-3.0519780 -2.6340640 -0.4810725
-3.4770977 -3.3307016 -0.4810470
-3.9857412 -3.5659371 -0.4809639
-3.1934291 -3.0138269 -0.4803065
-3.0785251 -2.7633151 -0.4797314
-3.2160657 -3.0491586 -0.4781798
-4.0619411 -3.5706525 -0.4772416
-3.9466462 -3.5565798 -0.4763528
-3.1083928 -2.8532377 -0.4761084
-3.0872745 -2.7979285 -0.4757005
-3.5386523 -3.3761215 -0.4754502
-3.1715839 -2.9807650 -0.4749053
-3.3714355 -3.2354259 -0.4747907
-3.1411440 -2.9255627 -0.4746053
-3.0654082 -2.7314759 -0.4732020
-3.4193400 -3.2804750 -0.4727402
-3.6944335 -3.4679953 -0.4722496
-3.3153440 -3.1769029 -0.4722310
-3.6540861 -3.4470304 -0.4721346
-3.7201989 -3.4800775 -0.4718060
-3.9043488 -3.5444948 -0.4716600
-3.8723256 -3.5362811 -0.4715770
-3.7605822 -3.4968890 -0.4695855
-3.0391876 -2.5817251 -0.4693401
-3.0943857 -2.8269189 -0.4689339
-3.1229949 -2.8930736 -0.4688611
-3.2679142 -3.1220228 -0.4688063
-3.0480949 -2.6638742 -0.4687998
-3.4500364 -3.3069460 -0.4677338
-3.7961430 -3.5099799 -0.4676729
-4.0135558 -3.5609803 -0.4674919
-3.4002907 -3.2631759 -0.4672275
-3.3469385 -3.2114089 -0.4664407
-3.8349539 -3.5225682 -0.4663905
-3.5911548 -3.4087397 -0.4661672
-3.0532985 -2.6992310 -0.4659330
-3.2936064 -3.1534085 -0.4658208
-3.2267406 -3.0692905 -0.4654808
-3.0386541 -2.6156207 -0.4650054
-3.5591485 -3.3880279 -0.4648430
-3.4976617 -3.3443742 -0.4642578
-3.0339414 -2.5543606 -0.4639928
-3.9691273 -3.5528238 -0.4634447
-3.6192945 -3.4250017 -0.4634282
-3.1565628 -2.9621783 -0.4632571
-3.9284576 -3.5452422 -0.4631177
-3.2008998 -3.0333382 -0.4628846
-3.1790461 -3.0004582 -0.4619985
-3.0738499 -2.7802386 -0.4617458
-3.0392817 -2.6422386 -0.4609585
-3.5233999 -3.3626326 -0.4608146
-3.2480088 -3.0991095 -0.4606805
-3.1101686 -2.8740547 -0.4600019
-3.6749949 -3.4540586 -0.4595571
-3.3293597 -3.1935622 -0.4595531
-3.0640445 -2.7534693 -0.4595185
-4.0515106 -3.5569831 -0.4576349
-3.4767208 -3.3274140 -0.4569893
-3.7422070 -3.4840452 -0.4569772
-3.0813766 -2.8106028 -0.4556627
-3.3822938 -3.2463187 -0.4554942
-3.9955670 -3.5506709 -0.4547590
-3.1407835 -2.9395779 -0.4544695
-3.0960038 -2.8480745 -0.4544456
-3.1282092 -2.9161002 -0.4542886
-3.8568912 -3.5229545 -0.4537517
-3.0514440 -2.7207649 -0.4537516
-3.4331102 -3.2914995 -0.4532413
-3.8169132 -3.5104565 -0.4531006
-3.8944859 -3.5319075 -0.4526595
-3.6433436 -3.4352989 -0.4525276
-3.7806483 -3.4976039 -0.4524367
-3.3649155 -3.2297682 -0.4513811
-3.2794825 -3.1395715 -0.4513150
-3.7071530 -3.4665178 -0.4512103
-3.0260710 -2.5932415 -0.4509062
-3.3062668 -3.1696921 -0.4506512
-3.2117240 -3.0535425 -0.4505728
-3.0401993 -2.6858862 -0.4495157
-3.1645777 -2.9839222 -0.4491991
-3.9524155 -3.5410193 -0.4486330
-3.5454330 -3.3750129 -0.4480452
-3.0221180 -2.5682429 -0.4474481
-3.4145994 -3.2752466 -0.4474178
-3.2588136 -3.1160037 -0.4465917
-3.5759522 -3.3943834 -0.4464874
-3.0330216 -2.6616083 -0.4461735
-3.2328464 -3.0836098 -0.4458129
-3.1871140 -3.0205519 -0.4453618
-3.6062930 -3.4122394 -0.4452990
-3.4600412 -3.3129371 -0.4451297
-3.1141845 -2.8970834 -0.4440715
-3.0242658 -2.6177262 -0.4440437
-3.5104038 -3.3499248 -0.4426014
-3.3408367 -3.2065159 -0.4424872
-4.0310683 -3.5449340 -0.4424426
-3.9218540 -3.5318773 -0.4419853
-3.0159518 -2.5382253 -0.4415400
-3.0830922 -2.8315483 -0.4415050
-3.0683651 -2.7949436 -0.4414981
-3.0592758 -2.7703413 -0.4411400
-3.7624309 -3.4855399 -0.4407640
-3.0503998 -2.7435967 -0.4406599
-3.8393390 -3.5107916 -0.4399809
-3.1478757 -2.9617710 -0.4392408
-3.7296578 -3.4717489 -0.4391000
-3.3963971 -3.2588952 -0.4390301
-3.9797740 -3.5388644 -0.4388504
-3.6650558 -3.4416180 -0.4381176
-3.8760530 -3.5195645 -0.4377556
-3.0974683 -2.8687759 -0.4369678
-3.4889117 -3.3335130 -0.4367337
-3.3197724 -3.1853950 -0.4366392
-3.6299337 -3.4228025 -0.4364980
-3.8022890 -3.4977049 -0.4364225
-3.2920230 -3.1557265 -0.4362656
-3.6871869 -3.4516063 -0.4360047
-3.0381245 -2.7115061 -0.4355082
-3.1278844 -2.9299754 -0.4343650
-3.0213177 -2.6415620 -0.4339129
-3.1975142 -3.0402516 -0.4336701
-3.0113981 -2.4870354 -0.4334965
-4.0044767 -3.5375860 -0.4334391
-3.1726139 -3.0043241 -0.4329390
-3.5300411 -3.3613435 -0.4319624
-3.2447919 -3.1024072 -0.4309640
-3.2177571 -3.0682301 -0.4309010
-3.4450768 -3.2990804 -0.4305438
-3.0110132 -2.5832055 -0.4303591
-3.3759357 -3.2400774 -0.4301219
-3.5621442 -3.3814658 -0.4295264
-3.3574296 -3.2229220 -0.4290656
-3.0268457 -2.6835903 -0.4284626
-3.2681118 -3.1303725 -0.4283876
-3.9482973 -3.5280055 -0.4281501
-3.5919518 -3.3987058 -0.4268996
-3.0057489 -2.5551024 -0.4265380
-3.7090677 -3.4579936 -0.4264275
-3.0042861 -2.5200832 -0.4257965
-3.9049046 -3.5189092 -0.4253434
-3.8239213 -3.4989056 -0.4252925
-3.0837472 -2.8500822 -0.4252312
-3.4225420 -3.2803347 -0.4246712
-3.0682763 -2.8154926 -0.4246441
-3.1558812 -2.9824559 -0.4244553
-3.7822609 -3.4853805 -0.4244296
-3.0095474 -2.6081619 -0.4237115
-3.6502347 -3.4291308 -0.4232300
-3.4727230 -3.3192033 -0.4224080
-3.8593735 -3.5070186 -0.4223729
-3.0455991 -2.7601491 -0.4219048
-3.1105002 -2.9070350 -0.4218057
-3.7496176 -3.4723357 -0.4215828
-3.0537988 -2.7848790 -0.4206524
-3.1339701 -2.9492918 -0.4204565
-3.0367792 -2.7362644 -0.4202712
-3.5043317 -3.3411795 -0.4195047
-3.1812130 -3.0224068 -0.4190620
-3.6141518 -3.4087934 -0.4188899
-3.3044783 -3.1709824 -0.4185585
-3.0155296 -2.6616032 -0.4183759
-3.3336546 -3.2003128 -0.4183552
-3.9746084 -3.5246726 -0.4182379
-3.2299018 -3.0874175 -0.4168092
-3.8826108 -3.5088300 -0.4155729
-3.6757089 -3.4385892 -0.4151212
-3.9300778 -3.5171872 -0.4149677
-3.0965529 -2.8855266 -0.4149290
-3.4027363 -3.2632792 -0.4148795
-3.0252208 -2.7104288 -0.4135751
-3.0068336 -2.6332781 -0.4134824
-3.2039136 -3.0552584 -0.4132170
-3.8043686 -3.4870600 -0.4132026
-3.5445827 -3.3662836 -0.4128903
-3.2855539 -3.1516221 -0.4126705
-3.2537934 -3.1166106 -0.4124920
-3.1200445 -2.9314057 -0.4110548
-2.9963395 -2.5749232 -0.4105485
-3.7292700 -3.4598223 -0.4104914
-3.5242441 -3.3523376 -0.4099195
-3.4560808 -3.3050114 -0.4097187
-3.1653994 -3.0036861 -0.4094121
-3.5787345 -3.3859998 -0.4093333
-3.8429359 -3.4955220 -0.4087251
-3.0704068 -2.8374522 -0.4087206
-3.6354009 -3.4164864 -0.4081231
-3.6985494 -3.4461273 -0.4078912
-3.3683407 -3.2328494 -0.4076971
-2.9905852 -2.5015905 -0.4076589
-2.9911114 -2.5412779 -0.4072353
-3.0137228 -2.6837640 -0.4068098
-3.0551165 -2.8061573 -0.4057870
-3.4355186 -3.2886758 -0.4056073
-3.0812833 -2.8645168 -0.4046573
-3.1423731 -2.9715919 -0.4044041
-3.7704334 -3.4717415 -0.4041166
-2.9968139 -2.6131396 -0.4034873
-3.9548664 -3.5132309 -0.4034598
-3.3489090 -3.2149957 -0.4028770
-3.4871180 -3.3260562 -0.4026905
-3.3872386 -3.2490939 -0.4024424
-3.9107545 -3.5063719 -0.4020145
-3.3187306 -3.1863648 -0.4018646
-3.0399419 -2.7739772 -0.4008073
-3.6593887 -3.4256523 -0.4007761
-3.2706908 -3.1369777 -0.4001500
-3.1874716 -3.0374822 -0.4001462
-3.6025321 -3.3966033 -0.3999799
-3.0303546 -2.7498472 -0.3999477
-3.1006003 -2.9045697 -0.3997546
-3.8680967 -3.4966714 -0.3995482
-3.2156782 -3.0735687 -0.3994418
-3.0015359 -2.6535279 -0.3979579
-3.2387420 -3.1015675 -0.3979486
-3.4177255 -3.2737376 -0.3973404
-3.7495482 -3.4614562 -0.3969443
-3.8239491 -3.4842143 -0.3967866
-3.2971602 -3.1650143 -0.3958663
-3.5081838 -3.3385300 -0.3952481
-3.1258177 -2.9501681 -0.3949238
-3.0190288 -2.7247380 -0.3944086
-3.5631804 -3.3723303 -0.3930468
-2.9826319 -2.5605273 -0.3927418
-3.7924577 -3.4732302 -0.3925420
-3.9366888 -3.5030386 -0.3909272
-2.9856948 -2.5948186 -0.3909238
-3.7202679 -3.4478123 -0.3906772
-3.6832700 -3.4325455 -0.3904863
-3.1720040 -3.0200910 -0.3901990
-3.0095015 -2.7026052 -0.3900758
-3.8909487 -3.4957234 -0.3898488
-3.0855335 -2.8834357 -0.3897192
-3.1521555 -2.9925540 -0.3894185
-3.0572061 -2.8274380 -0.3892463
-3.3344967 -3.2015048 -0.3887560
-3.4695771 -3.3109771 -0.3886948
-3.5391257 -3.3568196 -0.3886228
-2.9764299 -2.5298056 -0.3880339
-3.1085361 -2.9255297 -0.3879296
-3.0682660 -2.8520822 -0.3878158
-3.9712648 -3.5041932 -0.3874731
-2.9755689 -2.4687195 -0.3873758
-2.9743470 -2.4991318 -0.3871481
-3.2554925 -3.1218705 -0.3869504
-3.6228528 -3.4030776 -0.3868990
-3.1992537 -3.0566022 -0.3868548
-2.9897035 -2.6322722 -0.3864393
-3.0423028 -2.7971993 -0.3864280
-3.8500337 -3.4851251 -0.3863860
-2.9996051 -2.6759680 -0.3855273
-3.5882995 -3.3842829 -0.3844617
-3.3628792 -3.2269707 -0.3844392
-3.4480840 -3.2950132 -0.3842975
-3.6468202 -3.4133887 -0.3829314
-3.7691788 -3.4611832 -0.3822362
-3.4032428 -3.2607312 -0.3818832
-3.2804135 -3.1487936 -0.3811656
-3.3819366 -3.2429620 -0.3793023
-3.1368691 -2.9745704 -0.3791611
-3.0265236 -2.7675905 -0.3788906
-3.3106208 -3.1790089 -0.3788655
-3.4902053 -3.3228526 -0.3785951
-3.2225454 -3.0861873 -0.3785392
-3.9174134 -3.4928301 -0.3783374
-3.0171254 -2.7437408 -0.3782524
-3.8729518 -3.4848857 -0.3771860
-3.8116183 -3.4703479 -0.3767591
-3.7415622 -3.4489632 -0.3760999
-3.0913747 -2.9034258 -0.3760687
-2.9732334 -2.5754202 -0.3760124
-2.9879962 -2.6557836 -0.3748415
-2.9686003 -2.5505181 -0.3745685
-3.1826119 -3.0385450 -0.3745292
-3.2406021 -3.1071212 -0.3741600
-3.4262056 -3.2773283 -0.3741415
-3.7045979 -3.4346111 -0.3740267
-3.5232769 -3.3432643 -0.3736858
-3.6717604 -3.4204960 -0.3727305
-2.9765448 -2.6103764 -0.3724037
-3.1181596 -2.9497691 -0.3713415
-3.0051201 -2.7204162 -0.3711678
-3.5579773 -3.3631259 -0.3711624
-3.0719832 -2.8723956 -0.3708944
-3.6077690 -3.3897188 -0.3707408
-3.3475819 -3.2128739 -0.3706669
-3.8348689 -3.4726645 -0.3700926
-3.1591010 -3.0093045 -0.3692932
-3.0438581 -2.8177396 -0.3692836
-2.9616018 -2.4539241 -0.3692782
-2.9956503 -2.6954347 -0.3686477
-2.9597629 -2.4810105 -0.3683936
-3.0555568 -2.8430213 -0.3683753
-3.9484379 -3.4895337 -0.3682185
-3.7908982 -3.4604757 -0.3681930
-3.2070801 -3.0701893 -0.3672326
-3.2662310 -3.1350790 -0.3666647
-2.9603283 -2.5233060 -0.3664136
-3.8975898 -3.4825715 -0.3663467
-3.0292505 -2.7882996 -0.3663174
-3.4617982 -3.3010302 -0.3646969
-3.5791958 -3.3729009 -0.3645639
-3.1013713 -2.9266528 -0.3644946
-3.3274998 -3.1948763 -0.3640107
-3.6306277 -3.3986772 -0.3638867
-3.2944576 -3.1635705 -0.3636193
-2.9758764 -2.6349490 -0.3626504
-3.7630905 -3.4492211 -0.3617952
-3.8578391 -3.4726185 -0.3612722
-3.5054697 -3.3287307 -0.3599925
-2.9652153 -2.5918999 -0.3598790
-3.3947029 -3.2514266 -0.3598753
-3.3667283 -3.2288392 -0.3598128
-3.1438607 -2.9917479 -0.3596546
-3.6540100 -3.4075933 -0.3594551
-3.7246785 -3.4354647 -0.3594241
-3.4425121 -3.2865043 -0.3586421
-3.0139674 -2.7608143 -0.3586062
-2.9835578 -2.6750241 -0.3579754
-3.9262859 -3.4800779 -0.3568014
-3.0774616 -2.8916233 -0.3565775
-3.1271528 -2.9696324 -0.3564104
-3.4821578 -3.3127929 -0.3563706
-3.2270719 -3.0947409 -0.3558318
-3.5413933 -3.3492431 -0.3554625
-2.9575952 -2.5654146 -0.3550634
-3.6901095 -3.4206471 -0.3550137
-3.8146642 -3.4597479 -0.3549639
-3.1899655 -3.0523126 -0.3548691
-3.4165120 -3.2669911 -0.3536899
-3.3111579 -3.1797159 -0.3532884
-3.2513181 -3.1208867 -0.3531701
-3.0591661 -2.8618024 -0.3527826
-3.0025866 -2.7390389 -0.3527500
-3.1698514 -3.0279729 -0.3526628
-2.9462247 -2.4605537 -0.3511820
-2.9926641 -2.7139023 -0.3510692
-2.9642390 -2.6161839 -0.3505228
-3.2794011 -3.1492525 -0.3499743
-3.8840808 -3.4702811 -0.3496629
-3.0306090 -2.8084647 -0.3493020
-3.5978116 -3.3771814 -0.3485786
-3.1098975 -2.9473146 -0.3485384
-2.9458045 -2.4983514 -0.3484049
-3.8413636 -3.4613813 -0.3472750
-3.0421797 -2.8336998 -0.3470447
-2.9715828 -2.6545693 -0.3467499
-3.7904669 -3.4492202 -0.3466983
-3.0168915 -2.7815070 -0.3460162
-3.3417133 -3.2067448 -0.3459448
-2.9472397 -2.5357232 -0.3458817
-3.0873926 -2.9141349 -0.3457825
-3.5651763 -3.3593951 -0.3457653
-3.7457724 -3.4357811 -0.3457426
-3.2110154 -3.0785259 -0.3439115
-3.6204078 -3.3863111 -0.3438657
-3.3817962 -3.2392330 -0.3433020
-3.6723907 -3.4083028 -0.3423149
-3.4579103 -3.2934734 -0.3409271
-3.1524347 -3.0092662 -0.3409115
-3.7113961 -3.4223141 -0.3407038
-3.5251613 -3.3352999 -0.3404210
-2.9514209 -2.5861522 -0.3397440
-3.6429131 -3.3949484 -0.3396635
-2.9794035 -2.6933380 -0.3394661
-3.9072670 -3.4666105 -0.3389660
-3.8645683 -3.4604834 -0.3386834
-3.7698014 -3.4392277 -0.3383069
-2.9367814 -2.4233847 -0.3380628
-3.2943586 -3.1638203 -0.3371242
-3.4347160 -3.2770045 -0.3369579
-3.1344641 -2.9867173 -0.3368043
-3.4989104 -3.3187764 -0.3365893
-3.9509783 -3.4674248 -0.3363471
-3.0640492 -2.8812997 -0.3358314
-3.3252746 -3.1918920 -0.3353475
-3.2372950 -3.1079559 -0.3353135
-3.3633601 -3.2236414 -0.3352417
-3.2632770 -3.1341235 -0.3351076
-3.0014368 -2.7574862 -0.3349727
-3.4047967 -3.2554377 -0.3342667
-2.9336297 -2.4807764 -0.3339120
-3.1797832 -3.0446442 -0.3337099
-3.8196431 -3.4490541 -0.3336506
-2.9423361 -2.5604913 -0.3334196
-3.0965041 -2.9343924 -0.3325805
-2.9894806 -2.7308067 -0.3324813
-3.1195677 -2.9681672 -0.3319659
-3.5495299 -3.3466358 -0.3318135
-3.0467625 -2.8535849 -0.3317698
-2.9587503 -2.6402791 -0.3316187
-2.9348343 -2.5176675 -0.3306534
-2.9512435 -2.6124252 -0.3302970
-3.5838128 -3.3636316 -0.3297239
-3.1956395 -3.0633308 -0.3292286
-3.4800333 -3.3051057 -0.3286677
-2.9669334 -2.6730599 -0.3285609
-3.8865448 -3.4572864 -0.3284882
-3.0175207 -2.7997121 -0.3284494
-3.6924274 -3.4096872 -0.3280608
-3.7320471 -3.4228102 -0.3278646
-3.0279335 -2.8221715 -0.3266551
-3.8445975 -3.4493562 -0.3254733
-2.9270600 -2.4566779 -0.3251361
-3.0733327 -2.9026201 -0.3249891
-3.7939788 -3.4381893 -0.3242829
-3.2213148 -3.0921538 -0.3240712
-3.1624295 -3.0258847 -0.3234322
-3.6618035 -3.3961269 -0.3233757
-3.6090562 -3.3734568 -0.3233633
-3.2779623 -3.1484633 -0.3220308
-3.0041734 -2.7776176 -0.3213384
-2.9757318 -2.7102097 -0.3207062
-3.3457354 -3.2081951 -0.3204970
-2.9377043 -2.5808725 -0.3201162
-3.3086548 -3.1764215 -0.3195556
-3.6331389 -3.3826780 -0.3194612
-3.7570332 -3.4257391 -0.3190326
-3.3904139 -3.2425005 -0.3189249
-3.5188962 -3.3255124 -0.3187098
-3.1051030 -2.9525717 -0.3186545
-3.4517777 -3.2843568 -0.3173712
-3.4217154 -3.2641096 -0.3172435
-3.1429416 -3.0032283 -0.3171329
-2.9288703 -2.5438869 -0.3169822
-3.9107165 -3.4520067 -0.3167211
-3.8677308 -3.4470168 -0.3160263
-3.2495114 -3.1212929 -0.3159475
-3.7141044 -3.4109675 -0.3150128
-2.9212182 -2.4982613 -0.3145329
-3.5665972 -3.3496944 -0.3139935
-2.9880142 -2.7487743 -0.3137735
-2.9541618 -2.6586856 -0.3134213
-3.0509700 -2.8728139 -0.3125360
-3.0828007 -2.9230661 -0.3123118
-3.8199306 -3.4368997 -0.3121453
-2.9452062 -2.6317498 -0.3117688
-2.9162154 -2.4258939 -0.3117515
-3.4984022 -3.3117810 -0.3114149
-3.1264866 -2.9841705 -0.3112537
-3.3706076 -3.2264528 -0.3112410
-3.0326391 -2.8420913 -0.3108871
-3.1814704 -3.0505818 -0.3101329
-2.9151832 -2.4011787 -0.3100341
-3.5400467 -3.3345455 -0.3098572
-2.9158952 -2.4744720 -0.3098012
-3.3264661 -3.1912562 -0.3095665
-3.6825695 -3.3976346 -0.3094456
-2.9368877 -2.6061717 -0.3094148
-3.2040822 -3.0753834 -0.3084676
-2.9607002 -2.6862067 -0.3082809
-3.4719055 -3.2949091 -0.3078236
-3.7809610 -3.4255681 -0.3067424
-3.5922712 -3.3595942 -0.3065622
-3.0136512 -2.8101769 -0.3063807
-3.2333291 -3.1056867 -0.3062635
-3.7365738 -3.4128192 -0.3052670
-3.8912461 -3.4425462 -0.3043760
-3.2931966 -3.1621755 -0.3043376
-2.9106162 -2.4502017 -0.3037764
-2.9747354 -2.7288921 -0.3029808
-3.6510710 -3.3827014 -0.3026537
-3.8453635 -3.4356455 -0.3025949
-2.9235023 -2.5663097 -0.3024198
-3.4071698 -3.2515278 -0.3024102
-3.6212636 -3.3703784 -0.3018478
-3.0604204 -2.8940667 -0.3018008
-3.2639540 -3.1354559 -0.3012972
-3.1553781 -3.0222281 -0.3002484
-3.0010595 -2.7901974 -0.2999830
-2.9156834 -2.5326051 -0.2996315
-3.9276344 -3.4409940 -0.2995656
-3.1110640 -2.9675407 -0.2993192
-3.4376164 -3.2711266 -0.2992661
-2.9633870 -2.7077285 -0.2972946
-3.0951337 -2.9467847 -0.2964497
-3.3436502 -3.2038752 -0.2962915
-3.8030887 -3.4243061 -0.2962591
-3.7609062 -3.4145765 -0.2956348
-2.9085005 -2.5049323 -0.2947921
-3.3866392 -3.2356022 -0.2943603
-3.8705018 -3.4334006 -0.2937937
-2.9859773 -2.7635067 -0.2937779
-3.5199030 -3.3188081 -0.2936088
-3.3125989 -3.1782889 -0.2935775
-2.9235311 -2.5907196 -0.2933855
-3.7026068 -3.3964777 -0.2933188
-2.9414419 -2.6525128 -0.2931962
-3.1365141 -3.0010779 -0.2926274
-2.9322027 -2.6241593 -0.2926108
-3.0714211 -2.9145885 -0.2923725
-2.9002870 -2.4087775 -0.2923222
-3.0372853 -2.8614702 -0.2921790
-3.2159118 -3.0890315 -0.2920417
-3.5615328 -3.3391140 -0.2912228
-3.1701516 -3.0407012 -0.2906308
-3.0179005 -2.8292569 -0.2902971
-3.4902651 -3.3011985 -0.2901936
-3.4592467 -3.2826355 -0.2898185
-3.6732265 -3.3850397 -0.2896045
-3.2468858 -3.1193820 -0.2891224
-3.1898104 -3.0623351 -0.2890820
-3.3638425 -3.2178735 -0.2878973
-2.9482691 -2.6805954 -0.2878489
-2.8970306 -2.4337703 -0.2876224
-3.8285975 -3.4237036 -0.2874091
-3.7257118 -3.4004469 -0.2870330
-2.8998983 -2.4813730 -0.2867467
-3.6069366 -3.3581411 -0.2863147
-3.6391586 -3.3707244 -0.2851346
-3.2792692 -3.1492489 -0.2850485
-2.9099792 -2.5546991 -0.2842858
-3.7845565 -3.4135187 -0.2840905
-3.5837482 -3.3468151 -0.2837643
-3.0028227 -2.8069376 -0.2820828
-3.5417288 -3.3262933 -0.2820719
-3.4221505 -3.2571165 -0.2813001
-2.9702184 -2.7418152 -0.2812338
-3.0463847 -2.8821760 -0.2807096
-3.1195847 -2.9833986 -0.2791597
-3.3301436 -3.1909635 -0.2788124
-2.9002960 -2.5232750 -0.2785562
-3.0830826 -2.9367361 -0.2779427
-3.7495972 -3.4020590 -0.2778896
-3.8522985 -3.4208171 -0.2773994
-2.9887380 -2.7836037 -0.2773259
-2.9513612 -2.7027825 -0.2765251
-2.9185522 -2.6084747 -0.2765128
-2.8905614 -2.4600047 -0.2764435
-3.1514506 -3.0220385 -0.2756575
-3.8093945 -3.4132507 -0.2752146
-3.1017856 -2.9623564 -0.2750911
-3.4020889 -3.2424432 -0.2746675
-3.2297600 -3.1036297 -0.2746281
-3.2973916 -3.1642651 -0.2741558
-2.9091748 -2.5799625 -0.2741382
-3.2616952 -3.1330620 -0.2739362
-2.8852554 -2.4153904 -0.2739215
-2.9272311 -2.6418404 -0.2738081
-3.0244512 -2.8504257 -0.2738019
-3.5098193 -3.3070831 -0.2734713
-3.4425495 -3.2681925 -0.2734303
-2.9349774 -2.6652405 -0.2725235
-3.2046768 -3.0787275 -0.2723159
-3.6911752 -3.3823594 -0.2718938
-3.6594367 -3.3719768 -0.2715682
-2.8920726 -2.5014850 -0.2715456
-3.3822263 -3.2280782 -0.2714850
-3.3506324 -3.2054697 -0.2712575
-3.0575364 -2.9034295 -0.2707302
-3.4774864 -3.2882393 -0.2705347
-3.1780026 -3.0516334 -0.2701294
-3.5677122 -3.3337614 -0.2682048
-2.9750981 -2.7639635 -0.2680516
-3.7153097 -3.3875636 -0.2678977
-3.6272700 -3.3584668 -0.2676454
-3.7721978 -3.4012855 -0.2669988
-3.1337979 -3.0034410 -0.2668045
-2.9558047 -2.7244474 -0.2663204
-3.0072511 -2.8260041 -0.2655168
-2.8954588 -2.5441827 -0.2646783
-3.5999901 -3.3455917 -0.2628017
-3.0694855 -2.9232199 -0.2626285
-3.5322975 -3.3149442 -0.2625135
-3.0339915 -2.8719856 -0.2617315
-2.8780661 -2.4419259 -0.2616818
-3.3167418 -3.1783867 -0.2613188
-3.2444625 -3.1173287 -0.2609441
-3.2773375 -3.1460377 -0.2601427
-2.9905451 -2.8003055 -0.2592947
-2.8793987 -2.4726605 -0.2589861
-2.8744160 -2.3795317 -0.2584855
-2.9379182 -2.6910490 -0.2583986
-2.9139986 -2.6275547 -0.2577960
-3.1621954 -3.0361738 -0.2577396
-3.7401029 -3.3885139 -0.2572996
-3.4238200 -3.2525861 -0.2572712
-2.9050636 -2.6007568 -0.2568445
-3.8488250 -3.4072137 -0.2567230
-2.8856816 -2.5213174 -0.2566259
-3.0861412 -2.9476542 -0.2564926
-3.4604683 -3.2745018 -0.2561206
-3.4977451 -3.2951915 -0.2560100
-3.1128303 -2.9807996 -0.2554989
-2.8952569 -2.5676378 -0.2554760
-3.3367317 -3.1927970 -0.2551504
-3.7982567 -3.3992018 -0.2550251
-3.6792567 -3.3701302 -0.2543507
-3.2182437 -3.0926591 -0.2541035
-3.3684518 -3.2152302 -0.2538961
-2.9608322 -2.7473606 -0.2537224
-2.8705390 -2.4041937 -0.2531307
-3.8233021 -3.4014725 -0.2529034
-3.1902735 -3.0656563 -0.2526662
-2.9193482 -2.6514140 -0.2519353
-3.0139951 -2.8449186 -0.2514114
-3.3997661 -3.2356146 -0.2509624
-3.0455124 -2.8936914 -0.2509240
-3.6463372 -3.3577528 -0.2508056
-3.5557851 -3.3217069 -0.2505978
-2.9766241 -2.7812072 -0.2500790
-3.3000918 -3.1642162 -0.2500458
-3.5826171 -3.3325643 -0.2486197
-3.7029921 -3.3738552 -0.2479493
-2.8754733 -2.4989571 -0.2474664
-3.2612214 -3.1316893 -0.2474425
-3.1422731 -3.0159377 -0.2463568
-3.7621186 -3.3871693 -0.2462114
-3.6191602 -3.3458863 -0.2458752
-2.9408512 -2.7124105 -0.2451419
-3.5199780 -3.3023868 -0.2438483
-2.8642720 -2.4307718 -0.2429729
-2.8823090 -2.5454759 -0.2429088
-2.9989250 -2.8252908 -0.2427175
-3.0580893 -2.9142930 -0.2425961
-3.4804559 -3.2814670 -0.2419356
-3.1740918 -3.0500283 -0.2415788
-2.9244170 -2.6784248 -0.2411315
-3.0231704 -2.8648514 -0.2410114
-2.8655983 -2.4596698 -0.2407440
-3.4419627 -3.2590905 -0.2396234
-2.8914857 -2.5888210 -0.2389655
-3.3527729 -3.2015228 -0.2389230
-3.0967062 -2.9650391 -0.2386552
-3.2335379 -3.1068989 -0.2384657
-2.9004925 -2.6192686 -0.2382176
-3.3234315 -3.1801970 -0.2378683
-3.1244697 -2.9975557 -0.2374480
-2.8575252 -2.3894295 -0.2371140
-3.7265434 -3.3739148 -0.2367377
-3.7868533 -3.3858503 -0.2363281
-3.0748771 -2.9384863 -0.2363231
-2.9830786 -2.8018707 -0.2362269
-3.2832850 -3.1491943 -0.2360777
-2.9481685 -2.7366070 -0.2355789
-2.8726862 -2.5240903 -0.2350542
-3.2039801 -3.0794858 -0.2346046
-3.6647049 -3.3557569 -0.2345904
-3.8361536 -3.3914004 -0.2343930
-3.1566000 -3.0325567 -0.2337871
-2.9599126 -2.7614946 -0.2337655
-3.4184504 -3.2434204 -0.2335225
-3.5420987 -3.3089217 -0.2330817
-3.3804031 -3.2190388 -0.2330068
-2.8539677 -2.3519913 -0.2319444
-2.9069366 -2.6470500 -0.2309475
-2.8624496 -2.4848179 -0.2308758
-3.0336230 -2.8844961 -0.2304396
-3.6018216 -3.3324006 -0.2302210
-2.8795904 -2.5658041 -0.2299105
-3.5008633 -3.2880506 -0.2298712
-3.6394413 -3.3450930 -0.2290901
-3.5756759 -3.3213460 -0.2279572
-3.6906206 -3.3597563 -0.2276685
-3.4633894 -3.2676128 -0.2273460
-3.0064364 -2.8452928 -0.2271931
-2.9273422 -2.7005192 -0.2268364
-3.8118947 -3.3835512 -0.2268161
-2.8492861 -2.3660062 -0.2266935
-3.7533577 -3.3740541 -0.2265236
-3.3065613 -3.1661417 -0.2263344
-3.1873581 -3.0637706 -0.2257882
-3.2497034 -3.1203860 -0.2251330
-2.9683911 -2.7834775 -0.2245393
-3.1083243 -2.9816944 -0.2233551
-3.4014314 -3.2300533 -0.2225301
-2.8507967 -2.4465321 -0.2217995
-2.8479501 -2.4219452 -0.2210640
-3.0463770 -2.9054619 -0.2208859
-3.1401160 -3.0165270 -0.2206265
-2.9884114 -2.8198677 -0.2205886
-2.9349291 -2.7229206 -0.2204245
-3.2683852 -3.1356398 -0.2203120
-3.5232593 -3.2955388 -0.2202252
-3.0611807 -2.9255108 -0.2199801
-3.2191012 -3.0934919 -0.2199197
-2.8597643 -2.5082603 -0.2197185
-2.9102504 -2.6697582 -0.2189105
-2.8872819 -2.6097669 -0.2188613
-3.7157386 -3.3613941 -0.2187669
-2.8665611 -2.5413831 -0.2187359
-3.0850315 -2.9553137 -0.2177170
-3.0177597 -2.8667063 -0.2172885
-3.3421906 -3.1902418 -0.2172743
-2.8786269 -2.5868596 -0.2169848
-3.1681617 -3.0454395 -0.2165791
-3.4419367 -3.2524213 -0.2161547
-3.7844079 -3.3726601 -0.2153056
-3.3666865 -3.2061009 -0.2152682
-3.5594021 -3.3090268 -0.2144144
-3.8360047 -3.3772979 -0.2143158
-2.8400619 -2.3859207 -0.2137233
-3.6238590 -3.3323311 -0.2131901
-3.4833939 -3.2735163 -0.2130092
-2.8938941 -2.6363917 -0.2129109
-2.9442254 -2.7475451 -0.2127529
-3.6664340 -3.3449177 -0.2123694
-3.3232856 -3.1760536 -0.2117221
-3.2898306 -3.1514071 -0.2116768
-2.8466409 -2.4689755 -0.2107528
-3.5933289 -3.3202622 -0.2097011
-3.1232453 -2.9998957 -0.2095828
-3.2006776 -3.0764417 -0.2091237
-2.9740874 -2.8031298 -0.2090509
-3.7426325 -3.3612641 -0.2082338
-2.8672156 -2.5659960 -0.2078869
-3.4198668 -3.2374382 -0.2077404
-3.2354604 -3.1072017 -0.2070509
-2.9546869 -2.7711375 -0.2060729
-3.6919482 -3.3486364 -0.2060458
-3.5074408 -3.2829186 -0.2060354
-3.8131327 -3.3699243 -0.2059157
-2.9949975 -2.8378074 -0.2055686
-3.0280733 -2.8857098 -0.2050664
-3.3877643 -3.2171160 -0.2048478
-2.9130890 -2.6906000 -0.2047481
-3.1520707 -3.0301745 -0.2042895
-2.8319532 -2.3635279 -0.2042340
-3.0960497 -2.9708576 -0.2026389
-3.4627296 -3.2594591 -0.2024508
-3.0715467 -2.9425840 -0.2018239
-2.8450853 -2.4924249 -0.2015392
-3.7673362 -3.3613494 -0.2013922
-2.8347547 -2.4270792 -0.2012128
-3.2569620 -3.1245454 -0.2009773
-2.8977554 -2.6603571 -0.2002840
-2.8519282 -2.5275070 -0.1994850
-3.5406006 -3.2951724 -0.1993378
-3.6471813 -3.3327297 -0.1991299
-3.1825844 -3.0597658 -0.1989887
-2.8745675 -2.6033577 -0.1989776
-3.0489347 -2.9152546 -0.1983854
-2.9226477 -2.7164353 -0.1983469
-3.3068330 -3.1616813 -0.1968923
-3.7181415 -3.3489959 -0.1957851
-3.2178592 -3.0915313 -0.1952185
-3.0062713 -2.8584991 -0.1952145
-3.3535094 -3.1930736 -0.1947870
-3.5755707 -3.3071027 -0.1945809
-3.2761733 -3.1387229 -0.1941916
-3.7925786 -3.3593786 -0.1932910
-2.8320996 -2.4512428 -0.1930910
-2.8245362 -2.3864259 -0.1926586
-2.8536356 -2.5508264 -0.1923402
-3.1353826 -3.0138716 -0.1921908
-3.6153570 -3.3195614 -0.1921312
-3.4425016 -3.2455125 -0.1918770
-3.1107414 -2.9885392 -0.1910264
-2.8797835 -2.6279018 -0.1909066
-3.6775056 -3.3364879 -0.1903665
-3.4867629 -3.2670312 -0.1895768
-2.9381830 -2.7527326 -0.1893275
-3.4070149 -3.2246770 -0.1891296
-2.9764561 -2.8170048 -0.1888652
-3.1657106 -3.0440008 -0.1886952
-2.9612860 -2.7928862 -0.1886601
-3.3329766 -3.1781805 -0.1880976
-3.3749423 -3.2049967 -0.1874839
-2.8599829 -2.5797206 -0.1873557
-3.0825216 -2.9580257 -0.1864903
-3.5238100 -3.2826239 -0.1859493
-3.7505522 -3.3491213 -0.1859377
-2.8391770 -2.5134639 -0.1840202
-3.1998727 -3.0751654 -0.1836181
-2.9092414 -2.7019810 -0.1831961
-2.8310766 -2.4813995 -0.1830122
-3.0312955 -2.8969011 -0.1827056
-3.2455651 -3.1134196 -0.1817940
-3.5961114 -3.3081704 -0.1816992
-3.0585663 -2.9310711 -0.1814384
-2.9911680 -2.8423641 -0.1812584
-2.8847843 -2.6513154 -0.1812546
-2.8201452 -2.4272415 -0.1807230
-2.8951459 -2.6754701 -0.1803660
-2.8141842 -2.3680249 -0.1803211
-3.5569225 -3.2935889 -0.1802250
-3.2928253 -3.1487361 -0.1794236
-3.6372343 -3.3198678 -0.1794203
-3.0157113 -2.8776689 -0.1783916
-3.4680652 -3.2541068 -0.1782894
-3.7021588 -3.3356598 -0.1782428
-2.9457101 -2.7730408 -0.1781887
-2.9222157 -2.7318394 -0.1775936
-2.8657574 -2.6109359 -0.1762121
-3.1497783 -3.0288656 -0.1753631
-3.0972695 -2.9756430 -0.1749800
-3.4270391 -3.2317635 -0.1748728
-3.1811831 -3.0582261 -0.1745953
-3.7307695 -3.3387614 -0.1740863
-3.3166450 -3.1643012 -0.1740382
-2.8079849 -2.3416653 -0.1739453
-2.8406042 -2.5413315 -0.1737199
-3.1241511 -3.0039191 -0.1726222
-3.2271193 -3.0978222 -0.1725764
-2.8113522 -2.4048843 -0.1721330
-3.2663759 -3.1282864 -0.1720743
-3.5079874 -3.2703717 -0.1719472
-3.6637571 -3.3229152 -0.1718520
-3.7843061 -3.3444071 -0.1718137
-2.8193802 -2.4589990 -0.1714556
-3.3952032 -3.2130492 -0.1712366
-3.3591533 -3.1911344 -0.1708762
-3.0432047 -2.9147622 -0.1700868
-2.8461939 -2.5676515 -0.1688816
-2.9636343 -2.8065740 -0.1680236
-3.5790419 -3.2959746 -0.1674538
-2.8258900 -2.5004187 -0.1673980
-3.6183025 -3.3081763 -0.1672971
-3.4484561 -3.2405063 -0.1671739
-2.8709180 -2.6351898 -0.1661405
-3.5404710 -3.2813172 -0.1659506
-2.9313603 -2.7562810 -0.1653587
-2.8533481 -2.5923721 -0.1652302
-3.7587896 -3.3371997 -0.1646992
-2.9997079 -2.8603086 -0.1641561
-3.0700148 -2.9470704 -0.1640968
-2.7997928 -2.2961690 -0.1622231
-3.3384432 -3.1760162 -0.1619267
-3.4891054 -3.2578339 -0.1615699
-2.9768029 -2.8289818 -0.1614913
-3.1649016 -3.0434583 -0.1612386
-3.6869093 -3.3225941 -0.1612239
-2.8953832 -2.6931754 -0.1610604
-2.7994059 -2.3638855 -0.1605681
-2.8076988 -2.4359321 -0.1598578
-2.8281079 -2.5252152 -0.1596670
-3.2026426 -3.0762267 -0.1592768
-3.0231176 -2.8920849 -0.1592187
-2.9064834 -2.7158801 -0.1591692
-3.1092292 -2.9895646 -0.1589119
-2.8806342 -2.6654154 -0.1580906
-3.2850848 -3.1395723 -0.1580011
-2.8153189 -2.4806405 -0.1579482
-3.6471694 -3.3112865 -0.1576018
-3.2473158 -3.1119013 -0.1573530
-2.9485981 -2.7888153 -0.1568964
-3.3797403 -3.1999292 -0.1563050
-3.7146621 -3.3250421 -0.1556682
-3.1374316 -3.0175936 -0.1555582
-3.4142667 -3.2190133 -0.1553814
-2.8560026 -2.6141297 -0.1536125
-3.0873394 -2.9673807 -0.1531548
-3.0546412 -2.9312570 -0.1531025
-2.7921513 -2.3398366 -0.1526654
-3.3075307 -3.1536027 -0.1524349
-2.7990236 -2.4139781 -0.1522688
-2.8325950 -2.5530619 -0.1522176
-3.6026271 -3.2960099 -0.1518558
-2.9172061 -2.7400058 -0.1517803
-3.5610917 -3.2825954 -0.1515488
-3.4693346 -3.2447330 -0.1505691
-3.1815635 -3.0576682 -0.1500116
-3.5225765 -3.2674486 -0.1499384
-2.7885873 -2.3154781 -0.1487857
-3.7429432 -3.3247766 -0.1482889
-3.2203392 -3.0897619 -0.1481372
-3.2662979 -3.1243964 -0.1474190
-2.8032918 -2.4577970 -0.1467144
-3.0076117 -2.8759559 -0.1465716
-2.8391941 -2.5804022 -0.1462546
-2.7919446 -2.3896727 -0.1458746
-3.4426683 -3.2303041 -0.1458692
-2.9337889 -2.7711111 -0.1458666
-2.8154075 -2.5095663 -0.1456166
-3.6281200 -3.2999950 -0.1455800
-3.6682863 -3.3097605 -0.1452598
-3.3579310 -3.1840143 -0.1451210
-3.0386863 -2.9142517 -0.1450869
-2.8676770 -2.6494509 -0.1450608
-2.9862828 -2.8481983 -0.1447617
-2.9621193 -2.8143425 -0.1447250
-3.1548531 -3.0337895 -0.1408769
-2.8827416 -2.6843669 -0.1405770
-3.5838553 -3.2845539 -0.1405078
-3.1209985 -3.0022748 -0.1403351
-3.6961209 -3.3126105 -0.1401666
-3.0706488 -2.9509492 -0.1397781
-3.3331172 -3.1673162 -0.1393222
-2.8942411 -2.7073841 -0.1391878
-3.4987026 -3.2531588 -0.1387895
-2.7933442 -2.4337177 -0.1387468
-3.3984015 -3.2051849 -0.1386243
-2.7829730 -2.3630345 -0.1380030
-2.8031922 -2.4825590 -0.1369773
-3.5454248 -3.2694821 -0.1350364
-3.1007674 -2.9825775 -0.1348287
-3.2936113 -3.1407885 -0.1346863
-2.8539021 -2.6299053 -0.1342119
-3.7250505 -3.3136110 -0.1341907
-2.8426303 -2.6036078 -0.1340941
-2.8187758 -2.5410519 -0.1338332
-2.9476702 -2.7980073 -0.1336909
-3.1978659 -3.0703421 -0.1334671
-3.2409941 -3.1038857 -0.1334024
-3.0221212 -2.8967429 -0.1333061
-3.3776812 -3.1921195 -0.1331532
-3.6512539 -3.2983494 -0.1316230
-2.9047852 -2.7310884 -0.1311513
-3.4213533 -3.2144821 -0.1302704
-2.7743870 -2.3230252 -0.1301532
-2.8255967 -2.5662785 -0.1299784
-2.7834444 -2.4110875 -0.1298018
-2.9173554 -2.7531302 -0.1296078
-2.7738472 -2.2745951 -0.1290835
-3.1385693 -3.0189166 -0.1289070
-3.0492909 -2.9287210 -0.1287131
-3.3146787 -3.1530010 -0.1280348
-2.9714528 -2.8337344 -0.1279466
-3.4614312 -3.2325899 -0.1278631
-3.6138729 -3.2866361 -0.1274581
-3.5203943 -3.2568287 -0.1268557
-3.1768822 -3.0525457 -0.1266893
-2.8682431 -2.6673482 -0.1259855
-2.7903348 -2.4582732 -0.1258479
-2.8024146 -2.5045062 -0.1253627
-2.9948758 -2.8649653 -0.1253396
-3.6745298 -3.2990971 -0.1242101
-3.5676179 -3.2714145 -0.1240964
-3.2650718 -3.1190878 -0.1237502
-3.2157192 -3.0834884 -0.1234833
-2.9320313 -2.7795255 -0.1228463
-2.7751037 -2.3848018 -0.1225981
-3.3565116 -3.1767951 -0.1215612
-3.7466843 -3.3079865 -0.1212260
-3.0835443 -2.9657156 -0.1206934
-3.4838361 -3.2392334 -0.1200168
-2.7683427 -2.3509042 -0.1192441
-2.8812253 -2.6974190 -0.1189699
-3.7018162 -3.3009037 -0.1189135
-3.5919796 -3.2762010 -0.1186445
-2.8296003 -2.5907098 -0.1181619
-2.8058870 -2.5288550 -0.1172721
-3.0334861 -2.9125484 -0.1171018
-2.7636136 -2.3025835 -0.1164254
-3.1118685 -2.9939277 -0.1157480
-2.7781184 -2.4308412 -0.1155800
-2.7911667 -2.4847338 -0.1155582
-3.0649192 -2.9469117 -0.1153078
-2.8534762 -2.6468318 -0.1152227
-3.1583875 -3.0360961 -0.1151140
-3.4426778 -3.2192616 -0.1148415
-2.8408422 -2.6209082 -0.1148264
-3.4059038 -3.2014774 -0.1147225
-3.0089371 -2.8847715 -0.1139611
-2.8122509 -2.5526564 -0.1133401
-2.9513928 -2.8113575 -0.1131745
-3.3341104 -3.1613921 -0.1131283
-3.5429552 -3.2581806 -0.1127018
-3.6338692 -3.2837437 -0.1126358
-3.2940389 -3.1359775 -0.1108974
-2.8915352 -2.7210473 -0.1106649
-3.2367644 -3.0968942 -0.1097718
-3.3813692 -3.1871540 -0.1094425
-2.9051300 -2.7444597 -0.1092278
-3.1933542 -3.0641587 -0.1089972
-2.7595125 -2.3307550 -0.1087276
-3.1290264 -3.0098186 -0.1082422
-2.7692167 -2.4065161 -0.1081281
-2.9765522 -2.8463937 -0.1077003
-3.5053661 -3.2425219 -0.1075149
-2.7773090 -2.4535298 -0.1058577
-3.6636359 -3.2861401 -0.1054452
-2.9178869 -2.7661479 -0.1046907
-2.8675608 -2.6826913 -0.1041340
-3.4646414 -3.2247294 -0.1038783
-2.7922448 -2.5102857 -0.1036483
-3.6118613 -3.2735788 -0.1035834
-3.3155359 -3.1477231 -0.1030043
-2.8157789 -2.5754292 -0.1025547
-2.9363483 -2.7940804 -0.1025112
-3.0495157 -2.9318486 -0.1020109
-3.5790425 -3.2637313 -0.1017724
-3.6882511 -3.2879847 -0.1015772
-2.7593429 -2.3824282 -0.1012524
-2.9933481 -2.8689814 -0.1000510
-3.1747854 -3.0485108 -0.0997779
-3.2619333 -3.1124679 -0.0995196
-3.2197921 -3.0829324 -0.0994078
-3.0955088 -2.9783691 -0.0991601
-2.8272175 -2.6064490 -0.0987525
-3.0198766 -2.9001364 -0.0985643
-3.4251684 -3.2051207 -0.0984428
-3.3611819 -3.1722972 -0.0966160
-3.0761546 -2.9594395 -0.0959576
-3.5265590 -3.2448541 -0.0957598
-2.8397564 -2.6361340 -0.0952185
-3.4869280 -3.2301959 -0.0951613
-3.1483103 -3.0261676 -0.0947806
-2.9601608 -2.8290217 -0.0947450
-2.7517388 -2.3539910 -0.0946913
-2.7653701 -2.4313752 -0.0946794
-2.7966125 -2.5364288 -0.0946424
-2.7775476 -2.4788283 -0.0946400
-2.8518348 -2.6607686 -0.0943666
-2.7448247 -2.2650852 -0.0932207
-2.8761272 -2.7055658 -0.0927748
-3.3985383 -3.1898908 -0.0916840
-3.5569028 -3.2521983 -0.0914845
-3.6399429 -3.2730827 -0.0909808
-3.1156578 -2.9972015 -0.0908612
-3.2860140 -3.1260466 -0.0901782
-3.3341235 -3.1550026 -0.0891405
-3.4493434 -3.2123788 -0.0890310
-2.8917723 -2.7337734 -0.0881819
-3.0350307 -2.9178847 -0.0874949
-2.7411817 -2.3050181 -0.0859671
-2.7528017 -2.3996973 -0.0851966
-3.2450791 -3.0981153 -0.0848266
-3.6705967 -3.2749283 -0.0845677
-2.7651835 -2.4551180 -0.0845577
-3.1996821 -3.0660469 -0.0841569
-2.7786919 -2.5014689 -0.0841200
-3.6030671 -3.2609009 -0.0839328
-2.9040300 -2.7545436 -0.0837786
-2.9223994 -2.7811622 -0.0833833
-2.9756969 -2.8511518 -0.0833121
-2.8128202 -2.5900030 -0.0830285
-2.8026847 -2.5661838 -0.0829605
-3.0053230 -2.8859721 -0.0823689
-3.5085019 -3.2320765 -0.0821198
-2.9429779 -2.8098990 -0.0813285
-2.8584108 -2.6821442 -0.0810251
-3.3078209 -3.1371972 -0.0800375
-3.1650690 -3.0386576 -0.0797427
-3.3809321 -3.1773043 -0.0795203
-2.7392154 -2.3335693 -0.0794930
-2.7437647 -2.3733219 -0.0787991
-3.0572575 -2.9414031 -0.0787947
-3.5799614 -3.2519627 -0.0783201
-3.1329198 -3.0119064 -0.0777882
-3.4730817 -3.2172633 -0.0771960
-2.8221742 -2.6162134 -0.0767171
-2.7326915 -2.2809742 -0.0761952
-3.0881772 -2.9715226 -0.0757161
-3.2254702 -3.0829413 -0.0754001
-3.4289433 -3.1979989 -0.0751707
-3.2672228 -3.1106437 -0.0750405
-3.5388075 -3.2385138 -0.0749641
-2.7837970 -2.5284857 -0.0749601
-2.7518300 -2.4268194 -0.0745282
-2.8397357 -2.6524779 -0.0744300
-3.3549999 -3.1620978 -0.0737395
-3.0202489 -2.9034289 -0.0733928
-2.7655146 -2.4796765 -0.0726692
-3.6261073 -3.2594137 -0.0720265
-2.9887294 -2.8688464 -0.0711182
-2.9585140 -2.8327037 -0.0705994
-2.8752193 -2.7166772 -0.0698648
-3.1055583 -2.9874726 -0.0694979
-3.4033844 -3.1840530 -0.0686156
-3.1868055 -3.0538964 -0.0674882
-3.6523026 -3.2618078 -0.0674170
-3.3284991 -3.1455034 -0.0670139
-2.7886058 -2.5514643 -0.0662973
-3.2912143 -3.1236452 -0.0661950
-3.4533680 -3.2044868 -0.0656974
-2.7235586 -2.2572263 -0.0653093
-3.0424650 -2.9271107 -0.0652137
-3.6849325 -3.2648550 -0.0646167
-2.7516920 -2.4496651 -0.0640767
-3.5622950 -3.2397314 -0.0639794
-2.7250180 -2.3021824 -0.0638926
-3.1492409 -3.0242521 -0.0637916
-2.7383918 -2.3959223 -0.0637631
-2.8908977 -2.7438774 -0.0631429
-2.9290109 -2.7973545 -0.0627232
-2.9086167 -2.7695944 -0.0626388
-2.7995772 -2.5813266 -0.0622174
-2.7295935 -2.3536778 -0.0620504
-3.4920418 -3.2174165 -0.0619454
-3.0715239 -2.9558104 -0.0612988
-2.7701984 -2.5116001 -0.0607518
-3.6018612 -3.2478993 -0.0606761
-3.2082438 -3.0682422 -0.0604925
-3.2460077 -3.0937981 -0.0604778
-2.8456029 -2.6728398 -0.0599463
-2.8583882 -2.6947135 -0.0595748
-3.5203137 -3.2250539 -0.0590461
-2.8250944 -2.6367567 -0.0584120
-3.3770625 -3.1677474 -0.0569976
-3.0053834 -2.8889975 -0.0569933
-2.8082207 -2.6052982 -0.0568509
-2.9705945 -2.8502613 -0.0563695
-3.1221931 -3.0010951 -0.0550921
-2.9432724 -2.8176315 -0.0545262
-2.7385051 -2.4218153 -0.0544202
-2.7197825 -2.3237163 -0.0536807
-3.1694810 -3.0390035 -0.0535689
-3.4252613 -3.1878562 -0.0526088
-3.3488389 -3.1519788 -0.0523513
-3.4732960 -3.2059696 -0.0514654
-3.3110835 -3.1314443 -0.0514482
-2.7536227 -2.4788709 -0.0512607
-3.0892691 -2.9720617 -0.0511037
-3.0273977 -2.9126627 -0.0510578
-3.6306590 -3.2482257 -0.0509848
-2.7752796 -2.5383185 -0.0501252
-3.2743271 -3.1093212 -0.0499237
-3.5428669 -3.2271226 -0.0498998
-2.7121516 -2.2721149 -0.0494946
-3.5810096 -3.2365959 -0.0486669
-3.2284799 -3.0794618 -0.0483138
-2.7254328 -2.3811825 -0.0477218
-3.0564144 -2.9414374 -0.0472862
-2.8735111 -2.7252458 -0.0469802
-2.9863275 -2.8695997 -0.0466793
-3.3995890 -3.1741251 -0.0463584
-2.7849571 -2.5651057 -0.0459459
-3.6644757 -3.2495329 -0.0449381
-2.8315282 -2.6577616 -0.0445809
-2.7070909 -2.2447422 -0.0440028
-3.1951911 -3.0558454 -0.0430065
-3.4489588 -3.1932912 -0.0427873
-2.9142609 -2.7838111 -0.0426094
-2.7395672 -2.4491671 -0.0425392
-2.8121654 -2.6247107 -0.0416195
-2.7092717 -2.3053336 -0.0414588
-2.7574861 -2.5038882 -0.0413033
-2.9549282 -2.8346070 -0.0410559
-3.1386839 -3.0132974 -0.0408896
-2.8912528 -2.7533873 -0.0405162
-2.7945103 -2.5907934 -0.0403391
-3.5052579 -3.2112501 -0.0401016
-3.1065582 -2.9865865 -0.0394443
-2.7136416 -2.3510668 -0.0382271
-2.8444667 -2.6837235 -0.0380514
-3.6077216 -3.2361475 -0.0375755
-3.3308780 -3.1378219 -0.0374881
-3.2939828 -3.1177392 -0.0371213
-3.0724019 -2.9564488 -0.0367295
-3.2576365 -3.0956042 -0.0360355
-2.7241096 -2.4095929 -0.0355056
-2.8580584 -2.7066892 -0.0350181
-3.3668551 -3.1549004 -0.0349539
-2.9286626 -2.8043302 -0.0347255
-3.0393547 -2.9252304 -0.0337623
-3.5649156 -3.2241687 -0.0334414
-3.0133964 -2.8996262 -0.0333638
-3.1586103 -3.0278337 -0.0332894
-2.7621653 -2.5268212 -0.0325775
-2.7408488 -2.4716717 -0.0318333
-3.5296450 -3.2139966 -0.0310412
-3.2135145 -3.0659851 -0.0306638
-3.4281748 -3.1796159 -0.0297424
-2.9712407 -2.8549087 -0.0296887
-3.6392676 -3.2365857 -0.0292191
-2.7704231 -2.5500163 -0.0289975
-3.4725990 -3.1952598 -0.0288946
-2.6970625 -2.2832878 -0.0286084
-2.7270814 -2.4337165 -0.0285968
-2.7108249 -2.3726589 -0.0271131
-2.7029949 -2.3313592 -0.0270710
-2.9969395 -2.8829645 -0.0267871
-3.1800883 -3.0422794 -0.0262328
-2.7985707 -2.6105767 -0.0261162
-3.2382343 -3.0809643 -0.0260697
-3.0891775 -2.9707753 -0.0259796
-3.3921313 -3.1628803 -0.0254685
-2.8154495 -2.6422150 -0.0250131
-3.1223124 -2.9983638 -0.0248289
-2.6922492 -2.2285849 -0.0243726
-2.8997395 -2.7700715 -0.0238408
-2.8749104 -2.7363119 -0.0237738
-3.6714248 -3.2376045 -0.0236482
-3.2773749 -3.1040784 -0.0233941
-2.8311799 -2.6700300 -0.0228889
-3.5905316 -3.2240846 -0.0228537
-3.0576485 -2.9424671 -0.0220046
-3.3154101 -3.1248532 -0.0219161
-2.9403983 -2.8213822 -0.0214160
-3.4952845 -3.1987676 -0.0206894
-2.7777211 -2.5737198 -0.0205530
-3.3509165 -3.1417594 -0.0193333
-2.6938363 -2.3077772 -0.0192894
-2.7472911 -2.5062640 -0.0192147
-3.6202004 -3.2264518 -0.0179639
-3.4521487 -3.1833243 -0.0177643
-2.7111692 -2.3985439 -0.0176421
-2.7277062 -2.4553141 -0.0172132
-2.9138335 -2.7899735 -0.0167896
-3.0257410 -2.9124890 -0.0162976
-2.9555073 -2.8396390 -0.0161080
-3.1449671 -3.0148306 -0.0154347
-2.8431033 -2.6930609 -0.0147945
-2.6855423 -2.2618632 -0.0143973
-3.1984490 -3.0523377 -0.0134698
-3.5548237 -3.2110505 -0.0131700
-3.4129800 -3.1665778 -0.0125928
-2.8581643 -2.7164647 -0.0125357
-3.2585016 -3.0900497 -0.0116018
-2.7348093 -2.4844360 -0.0110751
-2.9816729 -2.8682346 -0.0110210
-3.3769531 -3.1506694 -0.0106844
-3.2979344 -3.1118634 -0.0105703
-2.6962555 -2.3534514 -0.0103864
-3.5199906 -3.2005897 -0.0102073
-2.7540100 -2.5324490 -0.0100080
-2.7836648 -2.5947977 -0.0095171
-2.8018185 -2.6282771 -0.0093785
-2.8857542 -2.7561368 -0.0093759
-2.7131481 -2.4236567 -0.0092203
-3.1066898 -2.9841986 -0.0090833
-3.0090861 -2.8963798 -0.0088476
-3.0731211 -2.9558985 -0.0083842
-3.1664642 -3.0291369 -0.0080457
-3.2278352 -3.0699841 -0.0070108
-3.6447736 -3.2232281 -0.0062734
-3.0434407 -2.9292285 -0.0053078
-2.6879138 -2.3279878 -0.0051678
-2.6989839 -2.3814104 -0.0049219
-3.4762033 -3.1851293 -0.0048285
-2.7619451 -2.5552761 -0.0043897
-3.5805840 -3.2112055 -0.0035056
-3.3323828 -3.1273897 -0.0034999
-2.8151333 -2.6547490 -0.0034755
-3.4373784 -3.1704392 -0.0008740
-2.9262021 -2.8083247 -0.0006127
-3.1286939 -3.0001353 0.0006954
-2.8988805 -2.7757817 0.0009633
-3.2796876 -3.0984887 0.0010856
-3.6087180 -3.2130580 0.0011511
-2.6775213 -2.2843228 0.0013715
-2.8710493 -2.7397009 0.0019319
-2.6716096 -2.1980558 0.0019886
-2.9660154 -2.8528885 0.0027030
-2.7152598 -2.4496319 0.0028272
-2.7011881 -2.4067582 0.0035160
-3.5001511 -3.1879959 0.0036265
-2.6717191 -2.2470518 0.0037939
-2.7370442 -2.5078088 0.0039271
-2.8273641 -2.6778485 0.0042159
-2.9445079 -2.8301361 0.0043214
-3.3968462 -3.1527865 0.0048798
-3.5440145 -3.1984852 0.0051487
-3.0919216 -2.9705190 0.0051909
-3.1877206 -3.0412198 0.0055567
-3.3560736 -3.1351421 0.0056179
-2.7679805 -2.5768016 0.0063352
-2.7871133 -2.6130486 0.0067055
-2.9945773 -2.8825725 0.0072406
-3.2103500 -3.0558821 0.0074499
-3.2456748 -3.0773111 0.0080331
-2.8443153 -2.7048372 0.0081332
-2.7218477 -2.4766583 0.0088594
-3.0591712 -2.9429335 0.0092963
-3.3146114 -3.1140319 0.0093940
-3.1513530 -3.0153088 0.0095289
-2.6750251 -2.3084664 0.0096168
-3.0236026 -2.9105850 0.0102995
-2.6831066 -2.3539974 0.0109388
-2.6646951 -2.2193367 0.0117397
-2.8014906 -2.6408743 0.0120301
-3.4597444 -3.1715356 0.0127549
-2.7458761 -2.5372976 0.0130553
-2.8847691 -2.7613155 0.0144642
-2.7019939 -2.4293564 0.0145023
-3.6301240 -3.2074479 0.0145603
-2.9101501 -2.7925146 0.0150183
-3.4189051 -3.1568699 0.0152965
-2.6861803 -2.3787533 0.0160526
-3.1128774 -2.9859728 0.0161588
-3.5659649 -3.1965582 0.0168084
-3.4831264 -3.1762088 0.0173207
-3.5258922 -3.1871715 0.0179587
-2.6632041 -2.2652113 0.0182138
-2.9782553 -2.8667269 0.0185837
-3.1719953 -3.0278532 0.0190128
-3.3794146 -3.1399885 0.0192933
-2.8131484 -2.6630927 0.0196417
-3.0416008 -2.9268619 0.0201830
-3.2961916 -3.1012801 0.0202156
-3.2669839 -3.0857187 0.0205179
-3.3359806 -3.1202719 0.0207694
-3.5993358 -3.1996681 0.0212084
-2.8562554 -2.7261874 0.0218201
-2.7546686 -2.5632378 0.0219344
-2.7239049 -2.4971066 0.0220033
-2.6717167 -2.3337205 0.0223316
-2.7728020 -2.5976937 0.0224114
-3.0759033 -2.9559139 0.0227516
-3.2280352 -3.0628401 0.0231203
-2.9298041 -2.8160499 0.0233241
-2.6571937 -2.2398819 0.0237016
-3.0087598 -2.8964635 0.0238035
-2.7079508 -2.4600423 0.0240127
-3.1350931 -3.0009799 0.0251845
-2.9522078 -2.8404637 0.0253785
-2.6898510 -2.4107837 0.0256140
-2.6617015 -2.2920316 0.0259692
-2.8702296 -2.7457937 0.0263030
-2.6528650 -2.1758335 0.0269338
-2.8279865 -2.6885635 0.0269637
-2.7867261 -2.6253987 0.0282381
-2.7315954 -2.5211041 0.0284988
-3.1998489 -3.0438352 0.0288451
-3.5053920 -3.1763029 0.0288525
-3.4012830 -3.1438828 0.0297294
-3.4482898 -3.1594997 0.0304282
-3.5482941 -3.1850009 0.0306671
-2.6724782 -2.3611912 0.0316099
-3.0970511 -2.9716057 0.0317670
-3.3615876 -3.1272596 0.0317987
-2.8406233 -2.7088047 0.0329913
-2.8950535 -2.7781098 0.0331443
-3.3176719 -3.1072622 0.0335772
-3.0271295 -2.9135175 0.0343899
-3.1544979 -3.0126019 0.0345840
-3.2480297 -3.0710735 0.0347898
-3.0588601 -2.9406558 0.0354748
-3.4716548 -3.1638837 0.0354826
-2.7997430 -2.6502984 0.0355046
-2.7405525 -2.5466513 0.0355230
-2.6462193 -2.2041567 0.0359197
-2.6774426 -2.3896542 0.0363827
-2.9906005 -2.8797143 0.0369708
-2.6943969 -2.4421291 0.0375408
-2.6591868 -2.3197369 0.0378118
-2.9131235 -2.7996975 0.0383416
-2.7587221 -2.5834771 0.0385893
-2.9668850 -2.8562640 0.0387613
-3.4236425 -3.1477293 0.0389790
-2.6485564 -2.2630335 0.0391365
-3.2847651 -3.0893197 0.0391680
-2.7094291 -2.4818196 0.0392185
-3.5731371 -3.1843363 0.0398420
-3.1212385 -2.9881953 0.0411399
-2.8138809 -2.6741841 0.0419440
-3.1771934 -3.0259733 0.0433387
-2.9380191 -2.8271665 0.0436067
-3.3430722 -3.1144182 0.0444997
-2.7731707 -2.6122606 0.0446249
-3.3824529 -3.1304469 0.0447298
-2.8770043 -2.7588027 0.0456717
-3.5291920 -3.1727522 0.0457346
-3.0821077 -2.9580376 0.0461137
-3.2239995 -3.0540505 0.0464221
-2.6598063 -2.3459692 0.0464661
-2.7167429 -2.5065838 0.0465365
-2.8552011 -2.7321540 0.0466020
-2.6821893 -2.4207859 0.0466133
-2.6483550 -2.2931117 0.0466959
-3.0123607 -2.8996645 0.0486827
-2.6382620 -2.2280273 0.0491980
-3.0418206 -2.9252283 0.0497937
-3.4955096 -3.1623667 0.0506559
-3.3051983 -3.0951534 0.0511631
-2.7452588 -2.5676723 0.0514390
-2.8280162 -2.6976748 0.0514459
-3.1407547 -2.9999022 0.0517279
-3.2684378 -3.0766262 0.0520290
-2.6646810 -2.3759083 0.0520300
-2.7265033 -2.5318372 0.0522323
-3.4529223 -3.1500281 0.0522955
-2.7863466 -2.6376428 0.0527344
-2.6960578 -2.4655453 0.0528387
-3.1973669 -3.0360651 0.0536609
-3.4064457 -3.1349272 0.0538271
-2.6311629 -2.1927138 0.0544709
-3.5514754 -3.1713740 0.0555851
-3.1071986 -2.9755090 0.0563413
-2.9526199 -2.8430127 0.0567820
-2.9016850 -2.7892429 0.0570124
-2.9795282 -2.8692679 0.0581984
-2.6693676 -2.4022460 0.0587162
-3.3626180 -3.1166241 0.0588070
-3.2453235 -3.0621879 0.0592052
-2.9217449 -2.8113453 0.0593557
-2.6843282 -2.4453624 0.0600236
-3.1613866 -3.0118938 0.0600578
-2.7586088 -2.5971037 0.0603707
-2.6353179 -2.2647809 0.0604359
-2.6441670 -2.3161193 0.0606056
-3.3292479 -3.1022488 0.0608757
-3.0631171 -2.9416057 0.0609558
-3.4304977 -3.1389601 0.0613197
-2.7986142 -2.6600049 0.0614557
-2.8415464 -2.7186042 0.0619732
-2.9971184 -2.8854365 0.0625317
-2.7019380 -2.4902028 0.0634678
-3.0269833 -2.9115447 0.0643147
-3.5181826 -3.1600094 0.0648017
-3.4767495 -3.1499665 0.0649096
-2.8139787 -2.6829404 0.0651248
-2.8653782 -2.7490628 0.0652555
-2.6513460 -2.3591548 0.0669473
-3.3883723 -3.1221335 0.0677405
-2.7716131 -2.6217174 0.0677474
-3.1267385 -2.9871065 0.0680587
-2.8839564 -2.7713445 0.0680753
-2.6259766 -2.2380854 0.0681438
-2.7315882 -2.5542124 0.0681449
-3.1823372 -3.0230935 0.0686344
-3.2907509 -3.0818178 0.0686860
-2.6719468 -2.4244993 0.0690337
-2.6344068 -2.2934334 0.0690703
-2.7106212 -2.5141192 0.0694095
-3.2255080 -3.0478564 0.0702438
-3.0909253 -2.9613353 0.0702687
-2.9367350 -2.8277644 0.0703338
-2.6192321 -2.1651891 0.0714588
-2.6563855 -2.3881368 0.0741711
-2.6175562 -2.1931762 0.0745525
-2.6403803 -2.3365100 0.0748800
-3.0485346 -2.9283113 0.0750853
-2.9641008 -2.8547729 0.0751609
-3.4568613 -3.1394523 0.0752466
-3.5415650 -3.1583414 0.0753210
-2.7835480 -2.6444870 0.0762305
-2.7425820 -2.5790635 0.0764983
-3.3495277 -3.1041747 0.0767266
-3.2632352 -3.0655850 0.0771250
-2.6869197 -2.4709446 0.0772166
-3.3125497 -3.0886522 0.0772256
-3.4148005 -3.1261216 0.0774618
-3.1478115 -2.9990484 0.0775604
-3.4982701 -3.1481632 0.0779519
-2.8247789 -2.7018191 0.0787403
-2.9070377 -2.7976546 0.0794174
-3.2040724 -3.0332362 0.0798679
-3.0123274 -2.8980747 0.0800414
-2.6218032 -2.2660994 0.0808459
-2.7167935 -2.5359040 0.0811704
-2.8488678 -2.7325165 0.0815505
-3.1107385 -2.9731736 0.0817288
-2.9849222 -2.8740318 0.0824894
-2.7566373 -2.6060117 0.0829288
-3.0718643 -2.9450486 0.0847500
-2.8016946 -2.6730896 0.0848868
-2.6278612 -2.3101961 0.0856998
-3.3764238 -3.1101489 0.0858965
-2.6720316 -2.4463703 0.0860208
-2.6119926 -2.2203758 0.0860776
-2.6929691 -2.4927464 0.0863415
-2.6437122 -2.3708642 0.0868322
-2.8719013 -2.7603778 0.0874384
-2.6583219 -2.4132481 0.0874912
-3.2451437 -3.0528038 0.0876023
-3.1681681 -3.0094099 0.0876630
-2.9484783 -2.8399350 0.0881912
-2.9244129 -2.8163844 0.0889130
-3.0313486 -2.9130115 0.0892900
-2.6042033 -2.1723799 0.0902639
-3.5201412 -3.1452239 0.0903881
-3.4360492 -3.1257818 0.0907674
-3.4772350 -3.1362245 0.0911144
-3.2855023 -3.0711285 0.0911427
-2.8894826 -2.7803698 0.0915551
-2.7682407 -2.6280867 0.0919616
-2.7269088 -2.5614402 0.0919894
-3.1298602 -2.9839420 0.0921136
-2.7027549 -2.5184657 0.0932618
-3.3354029 -3.0915350 0.0933939
-2.6094553 -2.2444846 0.0943301
-3.4006123 -3.1132206 0.0951451
-2.6008920 -2.1126293 0.0952505
-3.0936572 -2.9587478 0.0952608
-3.2237305 -3.0389937 0.0956981
-2.5996560 -2.1473666 0.0960600
-2.6316614 -2.3486620 0.0962789
-2.6153399 -2.2885955 0.0978888
-3.0004551 -2.8868506 0.0980247
-3.1886253 -3.0189132 0.0981743
-2.8359062 -2.7202365 0.0983167
-2.6005399 -2.1956438 0.0983266
-2.7869748 -2.6575680 0.0983293
-2.9701082 -2.8603156 0.0986408
-2.7410892 -2.5894858 0.0989935
-2.6762194 -2.4692477 0.0992201
-3.0558419 -2.9307513 0.1001655
-3.3081445 -3.0776567 0.1002854
-2.8137196 -2.6935180 0.1009224
-3.2651390 -3.0576336 0.1015772
-3.4998917 -3.1349860 0.1020571
-2.5931675 -2.1223392 0.1028036
-2.6589768 -2.4337489 0.1029204
-3.3622159 -3.0970503 0.1030527
-2.6222479 -2.3272768 0.1031565
-2.8555840 -2.7445176 0.1032249
-2.9051602 -2.7975765 0.1045124
-3.1556047 -2.9975363 0.1048949
-2.6448770 -2.4008398 0.1050369
-3.4565424 -3.1234572 0.1056277
-2.5982466 -2.2208476 0.1060582
-2.9366205 -2.8289817 0.1075641
-2.7544778 -2.6142923 0.1075957
-2.7098666 -2.5414689 0.1076408
-2.6045548 -2.2676266 0.1084119
-2.6333912 -2.3739781 0.1085638
-3.0180905 -2.9006906 0.1087194
-3.5341041 -3.1367542 0.1087636
-3.0751707 -2.9434880 0.1088540
-3.4235019 -3.1130189 0.1089508
-2.6832571 -2.4927157 0.1090534
-3.1133589 -2.9691569 0.1096382
-3.2443158 -3.0442065 0.1112518
-2.7984325 -2.6773855 0.1122802
-2.8783007 -2.7704793 0.1123370
-2.5879286 -2.1642419 0.1126728
-2.6110621 -2.3074125 0.1128590
-2.7721471 -2.6420645 0.1130137
-3.0383723 -2.9156487 0.1132648
-3.2106255 -3.0264284 0.1138490
-2.9547740 -2.8457742 0.1139939
-2.9854684 -2.8729059 0.1142833
-2.7261842 -2.5740278 0.1149772
-3.2891619 -3.0634832 0.1150929
-3.3915970 -3.1008589 0.1152165
-3.3306107 -3.0800845 0.1155995
-3.4791879 -3.1228956 0.1160577
-2.5952584 -2.2446192 0.1161952
-2.9196002 -2.8126106 0.1169973
-2.6619682 -2.4558759 0.1172234
-3.1345314 -2.9814209 0.1173012
-3.1776624 -3.0072856 0.1174313
-2.6920668 -2.5165402 0.1179574
-2.6208524 -2.3523409 0.1190841
-2.5865237 -2.2011136 0.1191796
-2.6460096 -2.4226945 0.1204692
-2.8246338 -2.7118530 0.1207140
-3.0946567 -2.9542348 0.1218184
-2.7382266 -2.5965467 0.1220605
-2.8434231 -2.7336763 0.1224156
-3.5163161 -3.1255315 0.1227656
-2.6001963 -2.2870759 0.1227702
-3.0612567 -2.9308225 0.1243649
-2.7834344 -2.6612820 0.1247579
-3.4443584 -3.1101460 0.1249434
-3.0053424 -2.8884008 0.1254892
-2.6324497 -2.3947239 0.1255571
-3.3550994 -3.0843031 0.1255929
-3.3105343 -3.0679337 0.1260359
-2.6096848 -2.3293013 0.1261221
-2.8933336 -2.7867785 0.1262668
-3.2637163 -3.0479151 0.1262840
-2.8611788 -2.7534400 0.1266257
-2.6684666 -2.4779343 0.1270791
-3.1549469 -2.9906586 0.1288058
-2.9701549 -2.8588677 0.1294699
-2.7582749 -2.6287503 0.1296581
-2.8092360 -2.6951247 0.1297277
-2.5768024 -2.1810220 0.1298588
-3.4149678 -3.1001250 0.1300025
-3.2309195 -3.0311858 0.1301394
-2.7103948 -2.5566047 0.1306177
-2.5815618 -2.2240232 0.1316772
-2.5892731 -2.2632306 0.1318787
-3.1989537 -3.0144051 0.1326501
-2.5723090 -2.1514321 0.1330118
-2.9426890 -2.8345316 0.1335964
-3.0264168 -2.9036399 0.1336086
-3.1203593 -2.9682664 0.1338739
-3.3794115 -3.0876498 0.1343987
-2.6199004 -2.3732973 0.1346097
-2.6483588 -2.4430551 0.1349703
-3.4705520 -3.1101266 0.1354061
-2.6783044 -2.5036660 0.1355063
-2.6959204 -2.5354037 0.1359926
-2.5983661 -2.3105353 0.1366391
-2.8768616 -2.7711548 0.1376891
-3.2881571 -3.0537859 0.1380079
-3.0465005 -2.9175886 0.1386798
-3.3352454 -3.0707356 0.1398791
-2.7238291 -2.5821505 0.1399136
-2.9902061 -2.8748746 0.1400024
-3.0803409 -2.9407656 0.1401459
-2.9108857 -2.8047933 0.1406229
-2.6085740 -2.3510167 0.1413506
-2.7692726 -2.6475723 0.1418474
-2.7938651 -2.6791772 0.1423734
-2.7417568 -2.6099431 0.1423975
-2.5637020 -2.1147016 0.1424751
-3.1774406 -2.9995059 0.1427772
-2.6360202 -2.4234073 0.1433285
-2.8310108 -2.7228551 0.1446792
-2.5693890 -2.2015847 0.1448497
-2.5874699 -2.2892117 0.1450753
-2.8484235 -2.7419778 0.1452230
-3.1017090 -2.9537050 0.1452661
-3.2527986 -3.0356871 0.1456118
-2.6546980 -2.4658485 0.1458088
-2.5767536 -2.2469112 0.1460749
-3.4393402 -3.0974861 0.1462617
-3.1414913 -2.9780813 0.1468912
-3.4023889 -3.0876344 0.1471144
-3.3590658 -3.0749051 0.1476998
-3.2175687 -3.0178144 0.1491228
-2.6228692 -2.4006296 0.1493365
-2.9579394 -2.8472813 0.1493465
-3.3133394 -3.0586213 0.1493523
-3.0091870 -2.8883685 0.1503918
-2.8944191 -2.7891849 0.1505013
-2.5611010 -2.1732364 0.1511096
-2.5961426 -2.3305603 0.1519986
-2.9277595 -2.8205135 0.1526632
-3.0642442 -2.9274573 0.1530684
-2.7009957 -2.5533189 0.1531541
-2.6654843 -2.4929172 0.1536401
-2.7530102 -2.6296511 0.1537663
-2.8090187 -2.6995549 0.1539260
-3.4836396 -3.1013750 0.1547462
-2.6820580 -2.5226481 0.1549185
-2.5552555 -2.1452492 0.1556534
-2.5760888 -2.2695893 0.1558686
-2.5663252 -2.2255899 0.1558946
-2.6089682 -2.3728169 0.1567429
-2.8643838 -2.7597568 0.1574166
-3.0316128 -2.9036847 0.1577188
-3.1207378 -2.9623537 0.1578479
-3.2744154 -3.0399255 0.1580265
-3.3831532 -3.0766858 0.1583726
-3.1958204 -3.0038106 0.1589451
-2.6385658 -2.4444281 0.1593326
-2.9785506 -2.8632374 0.1596367
-2.7808018 -2.6673336 0.1601096
-3.1609731 -2.9849705 0.1603295
-2.7278129 -2.5967490 0.1604369
-2.5842979 -2.3104899 0.1616392
-2.5491559 -2.0731689 0.1619153
-3.3355110 -3.0601452 0.1628239
-3.0876661 -2.9404748 0.1636205
-3.4620454 -3.0923575 0.1637046
-2.7109940 -2.5740183 0.1641405
-2.5470820 -2.1065471 0.1642827
-3.4233654 -3.0835589 0.1644202
-2.5966973 -2.3514043 0.1645771
-2.9112134 -2.8052090 0.1654598
-2.6253107 -2.4219267 0.1655421
-3.2395046 -3.0220702 0.1655611
-2.5549944 -2.2026956 0.1668637
-2.8231130 -2.7172634 0.1674368
-3.2977513 -3.0448574 0.1675378
-2.8399933 -2.7352727 0.1675738
-2.6511191 -2.4761884 0.1676929
-2.5641096 -2.2501154 0.1679330
-2.7947425 -2.6856883 0.1685269
-2.9462491 -2.8359282 0.1687605
-2.9967363 -2.8761564 0.1697526
-2.8823285 -2.7781008 0.1698424
-3.0498700 -2.9140732 0.1701949
-2.7641850 -2.6492710 0.1708530
-3.3633422 -3.0644368 0.1712152
-3.1409285 -2.9706399 0.1716829
-2.6889526 -2.5441488 0.1724028
-2.5468930 -2.1783136 0.1729587
-2.6091425 -2.3927936 0.1729874
-2.5715989 -2.2894424 0.1732507
-2.5408276 -2.1281562 0.1733751
-2.7392000 -2.6172933 0.1738151
-2.6686265 -2.5113434 0.1739108
-3.2164318 -3.0084364 0.1740040
-3.1801204 -2.9906995 0.1744285
-2.5845543 -2.3318730 0.1748542
-3.4027152 -3.0730330 0.1751906
-3.4905823 -3.0895264 0.1760896
-3.2619619 -3.0272302 0.1763316
-2.9654740 -2.8509822 0.1763982
-3.0168361 -2.8898649 0.1767956
-3.1065433 -2.9488870 0.1769370
-3.0710188 -2.9268699 0.1773943
-2.8549450 -2.7515246 0.1790626
-2.5334690 -2.0864788 0.1799312
-2.5518830 -2.2300064 0.1806425
-2.6349966 -2.4548883 0.1811069
-2.9273349 -2.8188950 0.1813365
-3.4419781 -3.0779571 0.1814465
-2.5965453 -2.3722468 0.1815944
-3.3221165 -3.0465397 0.1822192
-2.5375875 -2.1556564 0.1827130
-2.8096434 -2.7044952 0.1832097
-2.7218543 -2.5970247 0.1840274
-2.7806229 -2.6718465 0.1843717
-2.5727735 -2.3125256 0.1845901
-2.8987053 -2.7935670 0.1854914
-2.6983947 -2.5642547 0.1856328
-3.1622563 -2.9773170 0.1864513
-2.6550113 -2.4958753 0.1867472
-3.2870740 -3.0319079 0.1879441
-2.5556695 -2.2631187 0.1880595
-2.5415225 -2.2038358 0.1880720
-2.7508643 -2.6366253 0.1881002
-2.6118261 -2.4139640 0.1884263
-3.1267367 -2.9575236 0.1885019
-3.2430950 -3.0142429 0.1890140
-3.0349436 -2.9001536 0.1892870
-3.2010397 -2.9954405 0.1894346
-2.9847501 -2.8642485 0.1898798
-3.3785340 -3.0590727 0.1899333
-3.3501156 -3.0512405 0.1899643
-2.5839477 -2.3511772 0.1903485
-2.8280481 -2.7248577 0.1907785
-2.8723522 -2.7687571 0.1911546
-2.6752797 -2.5320909 0.1919872
-3.4195310 -3.0677610 0.1920846
-2.9502765 -2.8372786 0.1926970
-3.0898437 -2.9348690 0.1927539
-2.5263875 -2.1282971 0.1939776
-2.7648986 -2.6555632 0.1945490
-2.5328466 -2.1797417 0.1948013
-2.6198188 -2.4361499 0.1949758
-3.0051639 -2.8782061 0.1951511
-3.0570663 -2.9135573 0.1951646
-2.5590123 -2.2881257 0.1954424
-2.5993015 -2.3929750 0.1954533
-2.7941056 -2.6890301 0.1955026
-2.5209352 -2.0729871 0.1972521
-3.2236586 -3.0020520 0.1986552
-2.6394592 -2.4757973 0.1987533
-2.7341634 -2.6181219 0.1992219
-3.2666772 -3.0193660 0.1992541
-2.7080875 -2.5839362 0.2002666
-2.5431473 -2.2432156 0.2003453
-3.1830031 -2.9830805 0.2004504
-3.3078003 -3.0327133 0.2009264
-2.9147948 -2.8069872 0.2015604
-3.1462493 -2.9642028 0.2020005
-2.5704735 -2.3318170 0.2023086
-2.8464849 -2.7442859 0.2033308
-2.5865471 -2.3724891 0.2040061
-3.1106403 -2.9438695 0.2040929
-2.6600285 -2.5134090 0.2041664
-2.9694528 -2.8506643 0.2045994
-2.6849340 -2.5526177 0.2047437
-3.4018924 -3.0560608 0.2058655
-2.5146471 -2.1049279 0.2069773
-2.5217504 -2.1617050 0.2071017
-2.9351059 -2.8235492 0.2072669
-2.8108647 -2.7084863 0.2073505
-2.5329121 -2.2191232 0.2076454
-2.8866884 -2.7821444 0.2079396
-2.7765534 -2.6715469 0.2088717
-3.3698816 -3.0467380 0.2089467
-3.0758290 -2.9220515 0.2091206
-2.5456166 -2.2705584 0.2099035
-3.3376954 -3.0374075 0.2103418
-3.0250427 -2.8889867 0.2105061
-2.5584011 -2.3110030 0.2108949
-3.2493695 -3.0070346 0.2121207
-3.4289537 -3.0574836 0.2122723
-3.2871738 -3.0205273 0.2122774
-2.6243479 -2.4570077 0.2124156
-2.5995839 -2.4100202 0.2128107
-2.8634838 -2.7608538 0.2134156
-2.7511510 -2.6426783 0.2136386
-2.9925377 -2.8658833 0.2143837
-2.6450598 -2.4948224 0.2146730
-2.7191271 -2.6034406 0.2147288
-3.0470491 -2.9024392 0.2154978
-2.5222081 -2.1928339 0.2156519
-3.2061622 -2.9873445 0.2164284
-2.8263099 -2.7248501 0.2168190
-2.5054216 -2.0805414 0.2173324
-3.1683973 -2.9699481 0.2174059
-2.5116291 -2.1410113 0.2176580
-2.5707095 -2.3518038 0.2185046
-3.1303246 -2.9501820 0.2191264
-2.6681064 -2.5336376 0.2191381
-2.6082483 -2.4320254 0.2192565
-2.6941855 -2.5715447 0.2203871
-2.7963528 -2.6943416 0.2207217
-2.9543237 -2.8368876 0.2210866
-2.5465058 -2.2923721 0.2216192
-2.5309369 -2.2438871 0.2219538
-2.9021925 -2.7950132 0.2220429
-3.0986812 -2.9320017 0.2223531
-3.3098499 -3.0224453 0.2235569
-2.5852146 -2.3894870 0.2235913
-2.7356749 -2.6264637 0.2248778
-3.3909456 -3.0426792 0.2252842
-3.2296684 -2.9934983 0.2257554
-2.5030882 -2.1167087 0.2257830
-2.5580851 -2.3311332 0.2268950
-2.4977998 -2.0574510 0.2270585
-2.6291491 -2.4752209 0.2277159
-3.2681039 -3.0068570 0.2278401
-2.9248979 -2.8130487 0.2282080
-3.3553367 -3.0324654 0.2285063
-2.5091843 -2.1716522 0.2290296
-3.0127670 -2.8769422 0.2291674
-2.9773525 -2.8523782 0.2295345
-2.6528145 -2.5151403 0.2296455
-2.7634592 -2.6594879 0.2298331
-2.8502256 -2.7484583 0.2303713
-2.8798821 -2.7751766 0.2312206
-3.0684087 -2.9117918 0.2313116
-3.1899376 -2.9746527 0.2314548
-2.5343499 -2.2727284 0.2315588
-2.5174248 -2.2151521 0.2316640
-2.6773173 -2.5526474 0.2334080
-2.8127090 -2.7121842 0.2343629
-3.1494300 -2.9547015 0.2344327
-3.0350243 -2.8902830 0.2346156
-3.3337643 -3.0231599 0.2354627
-2.7057173 -2.5916965 0.2354769
-2.7823141 -2.6809323 0.2360697
-2.4934211 -2.0966758 0.2364247
-2.6110875 -2.4502015 0.2368993
-2.5452729 -2.3110980 0.2375416
-2.5705648 -2.3712354 0.2377339
-3.1183782 -2.9378475 0.2378060
-2.4992890 -2.1477846 0.2379757
-2.5902061 -2.4118303 0.2380207
-2.7475109 -2.6429634 0.2388365
-3.2931281 -3.0094367 0.2392720
-3.4172014 -3.0393912 0.2394105
-3.2141901 -2.9813616 0.2400893
-2.6378361 -2.4964712 0.2403000
-2.8324374 -2.7316518 0.2405324
-2.7207097 -2.6116471 0.2406739
-2.5059466 -2.1940959 0.2421161
-2.9438596 -2.8261312 0.2423199
-3.2527911 -2.9944533 0.2427673
-3.0886795 -2.9202078 0.2431303
-2.5167589 -2.2366536 0.2432319
-2.9979633 -2.8640973 0.2435243
-2.6627564 -2.5356907 0.2436410
-2.9118182 -2.8009687 0.2448523
-3.1728681 -2.9621115 0.2449345
-2.4842463 -2.0739591 0.2459077
-2.5563471 -2.3482936 0.2462926
-3.3795421 -3.0282438 0.2464803
-2.5769198 -2.3932648 0.2476345
-2.9654797 -2.8408079 0.2476614
-2.6891172 -2.5733096 0.2477946
-2.8639270 -2.7607351 0.2484119
-2.5324129 -2.2934398 0.2492436
-2.4806837 -2.0419462 0.2498403
-2.4959486 -2.1705056 0.2501732
-3.3153883 -3.0103738 0.2501875
-2.4880388 -2.1284241 0.2503050
-3.3531860 -3.0200749 0.2503452
-2.7957644 -2.6961688 0.2504555
-2.5205341 -2.2614048 0.2504939
-2.6216553 -2.4764601 0.2511441
-2.5960772 -2.4320048 0.2512626
-3.0533709 -2.8974776 0.2513533
-2.8905575 -2.7831605 0.2519461
-3.1372070 -2.9420896 0.2534453
-2.7685551 -2.6682026 0.2536027
-3.0198780 -2.8761022 0.2536268
-2.6480221 -2.5183601 0.2545012
-3.1965023 -2.9680357 0.2553636
-2.7334229 -2.6295998 0.2556493
-3.2340930 -2.9821915 0.2556530
-2.4798048 -2.1001457 0.2565156
-2.5038228 -2.2186464 0.2565481
-2.5436995 -2.3307715 0.2575359
-3.2816835 -2.9967644 0.2577218
-3.1086371 -2.9259621 0.2582281
-2.9287670 -2.8123306 0.2595073
-2.8194873 -2.7197162 0.2595668
-2.7030090 -2.5944045 0.2595739
-3.0743646 -2.9072781 0.2596019
-2.6712091 -2.5531349 0.2597397
-2.8473440 -2.7454721 0.2598549
-2.9858843 -2.8521688 0.2622817
-2.5587059 -2.3684151 0.2623489
-3.1588342 -2.9486793 0.2626411
-2.4831631 -2.1484173 0.2633184
-2.6049455 -2.4551962 0.2635640
-2.4928603 -2.1933701 0.2640666
-2.7500468 -2.6494563 0.2643888
-2.5807016 -2.4135873 0.2648362
-3.2571621 -2.9854650 0.2650957
-2.6332984 -2.5008045 0.2652428
-2.5195208 -2.2811212 0.2659407
-3.3364080 -3.0076081 0.2659800
-3.3707689 -3.0149103 0.2665192
-2.9525535 -2.8283786 0.2669022
-2.5052432 -2.2433871 0.2680549
-2.7177492 -2.6136521 0.2683698
-2.9081125 -2.7954113 0.2686146
-2.5305542 -2.3130490 0.2692635
-2.8742855 -2.7682523 0.2697587
-3.1812396 -2.9556287 0.2699472
-2.5678857 -2.3933687 0.2702045
-2.4677278 -2.0794161 0.2704240
-3.0390709 -2.8837140 0.2709871
-3.3076012 -2.9973955 0.2709984
-2.4725676 -2.1192342 0.2712130
-3.0075546 -2.8642156 0.2712547
-2.7824211 -2.6839313 0.2714024
-3.2146449 -2.9680244 0.2715632
-2.6859953 -2.5762100 0.2720902
-2.5455191 -2.3507040 0.2731524
-2.8019871 -2.7032546 0.2736030
-2.4621110 -2.0494680 0.2739729
-2.6547143 -2.5355430 0.2742248
-3.0938867 -2.9129245 0.2752137
-2.4803623 -2.1714202 0.2754208
-3.1273002 -2.9292144 0.2760100
-2.5897327 -2.4372264 0.2764800
-2.6180935 -2.4829056 0.2767025
-2.4903497 -2.2132248 0.2782400
-2.9727984 -2.8398202 0.2791491
-3.0597906 -2.8935399 0.2793497
-2.8338979 -2.7327684 0.2797788
-3.2816230 -2.9854070 0.2799588
-2.4561890 -2.0254339 0.2800877
-3.2374599 -2.9717997 0.2804683
-2.8572039 -2.7531999 0.2806939
-2.7634254 -2.6652076 0.2810416
-2.7319463 -2.6317538 0.2811406
-2.5054113 -2.2646314 0.2813748
-2.8915808 -2.7810533 0.2828076
-2.6397908 -2.5174588 0.2829662
-2.4692494 -2.1423290 0.2830300
-2.9371880 -2.8146518 0.2832581
-2.5325439 -2.3333509 0.2842190
-2.6685143 -2.5568269 0.2844564
-3.1507960 -2.9366697 0.2848139
-3.3593238 -3.0017455 0.2853109
-2.5167866 -2.2982947 0.2856138
-2.7029560 -2.5996031 0.2860653
-2.4593868 -2.1008175 0.2865967
-3.3268542 -2.9936949 0.2869068
-2.5496037 -2.3716999 0.2877726
-2.6024522 -2.4638231 0.2880321
-2.5740648 -2.4174822 0.2881613
-2.9928894 -2.8510036 0.2881702
-2.4919197 -2.2379202 0.2894278
-2.4530797 -2.0679540 0.2896544
-3.1985916 -2.9537675 0.2897977
-3.2622794 -2.9747524 0.2902967
-2.9188149 -2.8002576 0.2905098
-3.0217869 -2.8681177 0.2906157
-2.8168376 -2.7171308 0.2913532
-2.4767815 -2.1948040 0.2922552
-3.1756210 -2.9436954 0.2933448
-2.9572915 -2.8265164 0.2935125
-3.0799282 -2.8998246 0.2937472
-2.4471437 -2.0442925 0.2942431
-3.1103497 -2.9143531 0.2945100
-3.3033043 -2.9837658 0.2947015
-2.6257242 -2.5015011 0.2948242
-2.7894134 -2.6914543 0.2951975
-2.8753459 -2.7664545 0.2960450
-2.5580705 -2.3939909 0.2962602
-2.7461891 -2.6485852 0.2963975
-2.4668365 -2.1666309 0.2964426
-2.6860702 -2.5816633 0.2968682
-2.4423930 -2.0049930 0.2971174
-2.4568812 -2.1259535 0.2973451
-2.7175034 -2.6179150 0.2986223
-2.5365879 -2.3544480 0.2988143
-2.5873424 -2.4459868 0.2993151
-3.0475771 -2.8806610 0.2996742
-3.2281713 -2.9595148 0.2997769
-2.8443966 -2.7407461 0.3003411
-2.5190833 -2.3198824 0.3006818
-2.6531638 -2.5414031 0.3008189
-2.5030217 -2.2836333 0.3018897
-3.1350554 -2.9230402 0.3024745
-2.4785373 -2.2199224 0.3030616
-2.4922527 -2.2587110 0.3036644
-2.7708051 -2.6739002 0.3038528
-3.3483548 -2.9884005 0.3043414
-2.4456045 -2.0946504 0.3064185
-2.6105515 -2.4844683 0.3069606
-2.6370893 -2.5216907 0.3071651
-2.9346684 -2.8083665 0.3073946
-2.8974525 -2.7822373 0.3074667
-3.0093019 -2.8560890 0.3077515
-2.9773612 -2.8364427 0.3084218
-3.2822111 -2.9707343 0.3086699
-2.4349011 -2.0285505 0.3091152
-2.6700211 -2.5647814 0.3105905
-3.3214370 -2.9791131 0.3107977
-3.2556375 -2.9623898 0.3110050
-2.5714659 -2.4263266 0.3111081
-2.4530863 -2.1473529 0.3112294
-2.6977395 -2.5976076 0.3114557
-2.8040342 -2.7053003 0.3117443
-2.5440554 -2.3792208 0.3118877
-2.7312942 -2.6339741 0.3119242
-2.4365244 -2.0604707 0.3119806
-3.0984048 -2.9024838 0.3121506
-3.1572231 -2.9284378 0.3121899
-3.1971415 -2.9433531 0.3123139
-2.8622008 -2.7542525 0.3129008
-2.4639854 -2.1911875 0.3129370
-3.0303768 -2.8666642 0.3135870
-2.8245612 -2.7231488 0.3136411
-3.0674331 -2.8862842 0.3150273
-2.5060100 -2.3059790 0.3159490
-2.5952008 -2.4660373 0.3161228
-2.9548403 -2.8199907 0.3173025
-2.4793909 -2.2431343 0.3176043
-2.5205870 -2.3382392 0.3177290
-2.4425671 -2.1192319 0.3181665
-2.5568375 -2.4060951 0.3187146
-2.7525839 -2.6563709 0.3191772
-2.8815812 -2.7682007 0.3199901
-2.7854426 -2.6880019 0.3202392
-2.4258236 -1.9964431 0.3204605
-3.2220759 -2.9472568 0.3211542
-2.9164036 -2.7931847 0.3219248
-3.1222989 -2.9094970 0.3222089
-2.7115205 -2.6143552 0.3226318
-2.6204342 -2.5044085 0.3229822
-2.4322073 -2.0825264 0.3233151
-2.4521216 -2.1716755 0.3240106
-2.4663022 -2.2167054 0.3242151
-2.4930681 -2.2854390 0.3245026
-2.8431039 -2.7377331 0.3249742
-2.6449319 -2.5373998 0.3249786
-2.9968510 -2.8442144 0.3250014
-3.3024125 -2.9668793 0.3255971
-2.5304213 -2.3637595 0.3257886
-2.5781505 -2.4445480 0.3258647
-2.6823583 -2.5822774 0.3261226
-3.1795592 -2.9309309 0.3266448
-3.2727785 -2.9581679 0.3284622
-3.0864374 -2.8904613 0.3296375
-3.1452592 -2.9162115 0.3297741
-2.4205590 -2.0263368 0.3302466
-3.2452300 -2.9492635 0.3303959
-2.7681448 -2.6716338 0.3311053
-2.6047283 -2.4854226 0.3311922
-2.9396823 -2.8069937 0.3315169
-3.0497700 -2.8716309 0.3320467
-2.4397178 -2.1432311 0.3322243
-2.6602622 -2.5578299 0.3323751
-2.9745472 -2.8289010 0.3327753
-3.0201428 -2.8554980 0.3328261
-3.3268396 -2.9676395 0.3331037
-2.8139176 -2.7128445 0.3332348
-2.4213737 -2.0608837 0.3332974
-2.5429047 -2.3912221 0.3339624
-2.5063665 -2.3232778 0.3343181
-2.4803820 -2.2662730 0.3343416
-2.8984245 -2.7784994 0.3345644
-2.7381005 -2.6427172 0.3348771
-2.4537289 -2.1965472 0.3350054
-2.5619043 -2.4244240 0.3369578
-2.4123937 -1.9308951 0.3381434
-2.8629917 -2.7516633 0.3386917
-2.4262652 -2.1029672 0.3390039
-2.4665877 -2.2381523 0.3390680
-2.6965452 -2.5998546 0.3394174
-2.4105691 -1.9923420 0.3394983
-3.2058681 -2.9334316 0.3396488
-2.5887174 -2.4662220 0.3399865
-2.7964084 -2.6972714 0.3409494
-2.6281700 -2.5198894 0.3409749
-3.1076290 -2.8957337 0.3410521
-2.4937113 -2.3031708 0.3411703
-2.5162895 -2.3487308 0.3413613
-2.7193657 -2.6243415 0.3440462
-3.1675316 -2.9179219 0.3450069
-2.4386359 -2.1665667 0.3454244
-3.2965304 -2.9542077 0.3455808
-2.9243009 -2.7937683 0.3459252
-3.0723354 -2.8778961 0.3460975
-2.8324637 -2.7271031 0.3461314
-2.4269192 -2.1262910 0.3462692
-2.4101568 -2.0434836 0.3467184
-2.9590582 -2.8158135 0.3471812
-2.7532201 -2.6577654 0.3472552
-2.6724963 -2.5742809 0.3475295
-2.4042499 -1.9542292 0.3476583
-2.9931647 -2.8359330 0.3479220
-3.2628031 -2.9445743 0.3484815
-2.4536237 -2.2176489 0.3488813
-3.2296130 -2.9352517 0.3494617
-2.6448250 -2.5428347 0.3497730
-2.8821932 -2.7641305 0.3498285
-2.5727470 -2.4470464 0.3500751
-3.1327416 -2.9024636 0.3503932
-2.5254120 -2.3723428 0.3514816
-3.0371985 -2.8587359 0.3515731
-2.7790622 -2.6815865 0.3527405
-2.6113360 -2.5016596 0.3533467
-2.4800371 -2.2852612 0.3534173
-2.3979777 -1.9158702 0.3539244
-2.5445432 -2.4060651 0.3553043
-2.3987049 -1.9791875 0.3561505
-3.1914607 -2.9207057 0.3565366
-2.4002488 -2.0210183 0.3566744
-2.4660844 -2.2576346 0.3569444
-2.5014961 -2.3323085 0.3570462
-2.4410110 -2.1938749 0.3572298
-3.0170392 -2.8464269 0.3572930
-2.8150246 -2.7118078 0.3575392
-2.4117439 -2.0923200 0.3575582
-2.9080014 -2.7803064 0.3581770
-2.7345315 -2.6398849 0.3587013
-3.0936368 -2.8828523 0.3587346
-2.8526146 -2.7409436 0.3596195
-2.4245639 -2.1476427 0.3602879
-2.5944904 -2.4813228 0.3606934
-2.5578464 -2.4294639 0.3610439
-2.9433422 -2.8025015 0.3615758
-2.6866868 -2.5913072 0.3627021
-2.7046083 -2.6104278 0.3629201
-3.0598517 -2.8659112 0.3633718
-2.4036357 -2.0675118 0.3634015
-2.4887440 -2.3121384 0.3636565
-2.6568490 -2.5590389 0.3638540
-2.9786597 -2.8232622 0.3639545
-3.2808481 -2.9400637 0.3648164
-2.6285980 -2.5260521 0.3648567
-3.1527288 -2.9032217 0.3657230
-3.2514371 -2.9324705 0.3663089
-2.4532051 -2.2375300 0.3663909
-2.4139035 -2.1240746 0.3667374
-3.1165977 -2.8889821 0.3668533
-2.5093848 -2.3534844 0.3670850
-2.3886947 -1.9543175 0.3672588
-2.7950247 -2.6944072 0.3677415
-2.4280584 -2.1723610 0.3679984
-2.7646952 -2.6681174 0.3681925
-3.2138603 -2.9214020 0.3684931
-2.3851597 -1.8997760 0.3694944
-2.5792529 -2.4637946 0.3703291
-2.8355711 -2.7265860 0.3706702
-2.3892552 -2.0037068 0.3712126
-2.8745732 -2.7549158 0.3716016
-2.4420375 -2.2167039 0.3721300
-2.9258173 -2.7886263 0.3734463
-2.5280860 -2.3889302 0.3734902
-2.3820380 -1.9144480 0.3736242
-2.4675520 -2.2775534 0.3738824
-2.9992895 -2.8316654 0.3744829
-2.7199887 -2.6260459 0.3746938
-2.6707835 -2.5756931 0.3752693
-3.0410803 -2.8526356 0.3753163
-2.8953542 -2.7684386 0.3754519
-3.1825669 -2.9082688 0.3758638
-2.3913738 -2.0484598 0.3762280
-2.7467456 -2.6514537 0.3769725
-2.3814540 -1.9790577 0.3782481
-2.6025516 -2.4970293 0.3783158
-2.4308609 -2.1963484 0.3791822
-2.6409910 -2.5431348 0.3794425
-2.9627065 -2.8096229 0.3794482
-2.4013922 -2.1030131 0.3796493
-2.5407090 -2.4120861 0.3798394
-3.0787479 -2.8680490 0.3800314
-2.4927970 -2.3324002 0.3803714
-2.5643384 -2.4466823 0.3809297
-2.4116467 -2.1439420 0.3809835
-2.4547429 -2.2570292 0.3811536
-2.8159054 -2.7098265 0.3826613
-3.1378897 -2.8899540 0.3834758
-2.3752931 -1.9417098 0.3835308
-2.8581224 -2.7411745 0.3838033
-3.2337121 -2.9185675 0.3839591
-3.2944715 -2.9323504 0.3839890
-2.4738139 -2.2995722 0.3841118
-2.3926894 -2.0794843 0.3846299
-2.3823431 -2.0268199 0.3851493
-2.7812367 -2.6815281 0.3852943
-2.5113442 -2.3685609 0.3865818
-3.1627575 -2.8965181 0.3868690
-2.6945906 -2.6014693 0.3868989
-2.6185767 -2.5185159 0.3873368
-3.1061209 -2.8759277 0.3885637
-2.5875043 -2.4803509 0.3886026
-3.0211648 -2.8381114 0.3888102
-3.2089099 -2.9092705 0.3892872
-2.4419856 -2.2367462 0.3895017
-2.4153939 -2.1698468 0.3900778
-2.6557245 -2.5611575 0.3921311
-2.3739956 -2.0035392 0.3923711
-2.9861513 -2.8191629 0.3924056
-2.9145698 -2.7769126 0.3932190
-2.9427165 -2.7943366 0.3932651
-2.3983579 -2.1233860 0.3936766
-3.0600317 -2.8545176 0.3943192
-2.7320718 -2.6376840 0.3944163
-2.5503350 -2.4320278 0.3945510
-2.7633937 -2.6657024 0.3950148
-2.8837745 -2.7564269 0.3955952
-2.8411403 -2.7268491 0.3956999
-2.3677327 -1.9658934 0.3959845
-2.7990558 -2.6948537 0.3968114
-2.5220751 -2.3911914 0.3969243
-2.3786959 -2.0512519 0.3973118
-3.2598874 -2.9173405 0.3976076
-2.6783011 -2.5854751 0.3983306
-2.7094395 -2.6164932 0.3992169
-2.4543042 -2.2730987 0.3993727
-2.4946930 -2.3481865 0.3993988
-2.3883180 -2.0992214 0.3998812
-2.4287563 -2.2169417 0.3999130
-3.1841334 -2.8966585 0.4005853
-2.5691999 -2.4599650 0.4007700
-2.4779604 -2.3198736 0.4010238
-2.4173960 -2.1912622 0.4014661
-2.6309658 -2.5351925 0.4022269
-3.0873368 -2.8621778 0.4036799
-2.4020125 -2.1520877 0.4039270
-2.3794445 -2.0757636 0.4047189
-2.5340859 -2.4126679 0.4048761
-3.1488212 -2.8832771 0.4049206
-2.6029602 -2.5033584 0.4049467
-3.2292471 -2.9060758 0.4052502
-2.9683157 -2.8054517 0.4058417
-3.0086243 -2.8262105 0.4058865
-3.0406947 -2.8410054 0.4068632
-2.8245467 -2.7129925 0.4070789
-3.1237260 -2.8742152 0.4071420
-2.3658015 -2.0213705 0.4084733
-2.8679014 -2.7430021 0.4087890
-2.7821994 -2.6801119 0.4101498
-2.7488068 -2.6521753 0.4104713
-2.4378074 -2.2482634 0.4105691
-2.4610535 -2.2951110 0.4108538
-2.3591500 -1.9920573 0.4110682
-2.9014951 -2.7645669 0.4112807
-2.5081922 -2.3766692 0.4116366
-2.9298165 -2.7817302 0.4117845
-2.5834198 -2.4813145 0.4135809
-2.6939156 -2.6016009 0.4137551
-2.6480360 -2.5551039 0.4149866
-2.3526494 -1.9530230 0.4150336
-3.2048135 -2.8944883 0.4153046
-2.3890491 -2.1322858 0.4155359
-2.4036605 -2.1737915 0.4158063
-3.1702578 -2.8842505 0.4173208
-3.0622375 -2.8462229 0.4179064
-2.3483740 -1.9254734 0.4183476
-2.5529448 -2.4435747 0.4184809
-2.3638947 -2.0443620 0.4186261
-2.7309222 -2.6359539 0.4187396
-2.9915851 -2.8135543 0.4187553
-3.2672235 -2.9057814 0.4194442
-2.4156113 -2.2081366 0.4194873
-2.8081459 -2.6990673 0.4197417
-2.9508809 -2.7914666 0.4203280
-2.6148265 -2.5196867 0.4205044
-2.3797568 -2.1103576 0.4205688
-2.6663820 -2.5744495 0.4206962
-2.8489657 -2.7277466 0.4212323
-2.4810872 -2.3378597 0.4217450
-2.4244688 -2.2314370 0.4230835
-3.1067245 -2.8607351 0.4240921
-2.3429302 -1.9024424 0.4241623
-3.0263650 -2.8281940 0.4243121
-2.5185251 -2.3980252 0.4249275
-2.3479749 -1.9753178 0.4249984
-3.2433865 -2.8981042 0.4250440
-2.4676268 -2.3170291 0.4250676
-2.4418569 -2.2692349 0.4252854
-2.7120071 -2.6188488 0.4254677
-2.3649414 -2.0689372 0.4260675
-2.8859323 -2.7510584 0.4263249
-2.7649150 -2.6645227 0.4264337
-2.4944483 -2.3619605 0.4268171
-2.3509059 -2.0104919 0.4276924
-2.6319692 -2.5392972 0.4277951
-2.5366945 -2.4250162 0.4279688
-3.1422626 -2.8703605 0.4280941
-2.5660821 -2.4634967 0.4287104
-2.3908517 -2.1577800 0.4289069
-3.0851766 -2.8501207 0.4301700
-2.8300925 -2.7127019 0.4315800
-2.9212219 -2.7712139 0.4319240
-2.5979999 -2.5022430 0.4321006
-3.1906740 -2.8817745 0.4324280
-2.9718286 -2.7988384 0.4328609
-2.7915056 -2.6844290 0.4334995
-2.4496525 -2.2912428 0.4348947
-2.3665379 -2.0944313 0.4352306
-3.2210161 -2.8875032 0.4354711
-2.4017409 -2.1937710 0.4358302
-2.6798519 -2.5883098 0.4359746
-2.8673133 -2.7368096 0.4361027
-2.7472157 -2.6487562 0.4367974
-2.3496447 -2.0339026 0.4371049
-2.3780982 -2.1334827 0.4372950
-2.4279709 -2.2516561 0.4374931
-2.3336751 -1.9243323 0.4381791
-3.0106204 -2.8151543 0.4388208
-3.0497206 -2.8327879 0.4390324
-2.6482406 -2.5572426 0.4397629
-3.1678705 -2.8717751 0.4398269
-2.3348901 -1.9532550 0.4403417
-2.5790602 -2.4818884 0.4403872
-3.1235741 -2.8578820 0.4418251
-2.9027733 -2.7573370 0.4430114
-2.3385576 -1.9960767 0.4430729
-2.5485935 -2.4449178 0.4431196
-2.7259868 -2.6302946 0.4431473
-2.4078498 -2.2159814 0.4439138
-2.6968299 -2.6041861 0.4439272
-2.4815021 -2.3504596 0.4441180
-2.8135684 -2.6988889 0.4443100
-2.9450704 -2.7807332 0.4454470
-2.5238719 -2.4129509 0.4459168
-2.3500389 -2.0571111 0.4461830
-2.8481942 -2.7220446 0.4463360
-2.6132696 -2.5212289 0.4466175
-2.5089616 -2.3930119 0.4477569
-2.4641692 -2.3255626 0.4486369
-2.4341703 -2.2722604 0.4487153
-2.3875990 -2.1746284 0.4491926
-3.0725520 -2.8368664 0.4499286
-2.9897125 -2.8017342 0.4500248
-2.7745804 -2.6691547 0.4502907
-2.4932943 -2.3710346 0.4503314
-3.1478833 -2.8606026 0.4508818
-2.6640527 -2.5731177 0.4510774
-2.3632891 -2.1126784 0.4512662
-3.1027248 -2.8466146 0.4513600
-2.8848652 -2.7439548 0.4525989
-2.3768783 -2.1521306 0.4528905
-2.4141438 -2.2374483 0.4533639
-3.2085098 -2.8747060 0.4535817
-2.5612922 -2.4632400 0.4536514
-2.3531565 -2.0858820 0.4540963
-2.6329337 -2.5422319 0.4543886
-2.3278264 -1.9746448 0.4547093
-2.3347612 -2.0178765 0.4553994
-3.0293061 -2.8174293 0.4555184
-2.5913160 -2.4980988 0.4558341
-2.4489865 -2.3044481 0.4560091
-2.9245236 -2.7662470 0.4560773
-2.7965337 -2.6842646 0.4577218
-3.1860260 -2.8666956 0.4583583
-2.7569876 -2.6544919 0.4583714
-2.9654661 -2.7871640 0.4586633
-2.5353300 -2.4321975 0.4603411
-2.6818225 -2.5899626 0.4607101
-2.3940773 -2.2023267 0.4612028
-2.8322521 -2.7082387 0.4615286
-2.7113153 -2.6164048 0.4619085
-3.2332664 -2.8745681 0.4624495
-2.3367573 -2.0446343 0.4629298
-3.1298126 -2.8489141 0.4641473
-2.8663101 -2.7296412 0.4643021
-3.0558912 -2.8239434 0.4655531
-2.4199721 -2.2586491 0.4659206
-2.6487655 -2.5587285 0.4663463
-2.3639474 -2.1363306 0.4666218
-3.0112915 -2.8052352 0.4668522
-2.7360827 -2.6366185 0.4668870
-2.9067787 -2.7527898 0.4674479
-2.4760390 -2.3537949 0.4676535
-2.3232808 -2.0000262 0.4690894
-3.1665919 -2.8562959 0.4691324
-2.3762055 -2.1717886 0.4709425
-2.4010259 -2.2258870 0.4709546
-2.6094917 -2.5194664 0.4709615
-2.5750973 -2.4822412 0.4713205
-2.4323110 -2.2842204 0.4713584
-2.3503440 -2.1062802 0.4715715
-2.3392830 -2.0727680 0.4717367
-2.9429614 -2.7710261 0.4718625
-2.5121422 -2.4053715 0.4719923
-2.5493680 -2.4529675 0.4722961
-2.4592230 -2.3298624 0.4724932
-3.0912504 -2.8329875 0.4727040
-2.7827898 -2.6716806 0.4735946
-2.4968759 -2.3857863 0.4737159
-2.3070218 -1.9070321 0.4742334
-2.8155203 -2.6944278 0.4745105
-2.9870755 -2.7915234 0.4747640
-3.2117205 -2.8629936 0.4749600
-2.3244526 -2.0257866 0.4766642
-2.6665093 -2.5755840 0.4773465
-2.3118067 -1.9694879 0.4773598
-2.8890046 -2.7398048 0.4783653
-2.6962572 -2.6023451 0.4784745
-2.8504795 -2.7163665 0.4785360
-3.0392505 -2.8119796 0.4789183
-2.4426291 -2.3065052 0.4796785
-2.6255878 -2.5363654 0.4797794
-3.1870331 -2.8539263 0.4821872
-2.3828745 -2.1989622 0.4831180
-2.7600708 -2.6534082 0.4832741
-3.1199218 -2.8364870 0.4833027
-3.1506433 -2.8447414 0.4833161
-2.5928021 -2.5027829 0.4834275
-2.5261730 -2.4265449 0.4835200
-2.3625782 -2.1543471 0.4840216
-2.3025623 -1.9381452 0.4855612
-2.7213525 -2.6228422 0.4856320
-2.9632698 -2.7761004 0.4864534
-3.0725411 -2.8205129 0.4864924
-2.4816118 -2.3689118 0.4870123
-2.9248814 -2.7567798 0.4870698
-2.4045687 -2.2454565 0.4872222
-2.4178848 -2.2698995 0.4878961
-2.3368303 -2.0934067 0.4886754
-2.3092983 -1.9961922 0.4890167
-3.0106734 -2.7959097 0.4897723
-2.7986253 -2.6795229 0.4906255
-2.8725293 -2.7265849 0.4907412
-2.6479652 -2.5584170 0.4909490
-2.7423546 -2.6387028 0.4914328
-2.3447772 -2.1192778 0.4918099
-2.4662413 -2.3488473 0.4918642
-2.5595944 -2.4678284 0.4926005
-2.8339313 -2.7024108 0.4926543
-2.3899077 -2.2221990 0.4932042
-2.3198634 -2.0469861 0.4939503
-2.2927980 -1.9172274 0.4940327
-2.6812900 -2.5883478 0.4945291
-2.4497312 -2.3252530 0.4949285
-2.6094438 -2.5208164 0.4952466
-2.5763203 -2.4864659 0.4953593
-2.3668549 -2.1760653 0.4954304
-2.5022577 -2.3995197 0.4956596
-3.0990129 -2.8241620 0.4958374
-2.3107341 -2.0210565 0.4961950
-2.3256431 -2.0727416 0.4968512
-2.9043948 -2.7428327 0.4970496
-2.2977044 -1.9599103 0.4980280
-2.7792291 -2.6646749 0.4983270
-2.5400975 -2.4463422 0.4992072
-3.0327100 -2.8002303 0.4998560
-2.9851836 -2.7811367 0.5003689
-2.4268149 -2.2924566 0.5005343
-2.9458654 -2.7627199 0.5005796
-2.7061632 -2.6089281 0.5006320
-2.3495581 -2.1429359 0.5011302
-3.0564119 -2.8074328 0.5024348
-2.8541600 -2.7126414 0.5024579
-3.1440973 -2.8324932 0.5035069
-2.6251804 -2.5368701 0.5049359
-2.5156315 -2.4188448 0.5049438
-2.8172942 -2.6888242 0.5051786
-2.4867320 -2.3822247 0.5068238
-2.6625502 -2.5711851 0.5082951
-3.1694567 -2.8353784 0.5085149
-2.7622662 -2.6507249 0.5089086
-2.5933544 -2.5053818 0.5089360
-2.3711770 -2.1977555 0.5091544
-2.3315021 -2.1082926 0.5092640
-2.4020153 -2.2564674 0.5095538
-2.7307995 -2.6273766 0.5096449
-3.0808881 -2.8117732 0.5097985
-2.2850072 -1.9366433 0.5099616
-3.1207316 -2.8230229 0.5102386
-2.8868848 -2.7291955 0.5110919
-3.0066031 -2.7852467 0.5111810
-2.2787134 -1.8890923 0.5113575
-2.2925754 -1.9805893 0.5114404
-2.9259788 -2.7488839 0.5128698
-2.3539052 -2.1653602 0.5131984
-2.3117519 -2.0587158 0.5141866
-2.9692061 -2.7684443 0.5142894
-2.4685894 -2.3604187 0.5144762
-2.6431581 -2.5536265 0.5144936
-2.3885021 -2.2354075 0.5146369
-2.5528646 -2.4633898 0.5164229
-2.7977280 -2.6734146 0.5165611
-2.4352378 -2.3137467 0.5174211
-2.2975021 -2.0185802 0.5180953
-2.6911055 -2.5949164 0.5181513
-2.4488393 -2.3342327 0.5184500
-2.3362671 -2.1306493 0.5184817
-2.8401680 -2.6998150 0.5185544
-2.3184070 -2.0867814 0.5199993
-2.5284009 -2.4366804 0.5200900
-3.0430601 -2.7944944 0.5211367
-2.5020677 -2.4056710 0.5213320
-2.4117841 -2.2795449 0.5213811
-2.5727695 -2.4853101 0.5219213
-2.6093918 -2.5219222 0.5223553
-2.2804576 -1.9583513 0.5226440
-2.8679294 -2.7149378 0.5229140
-2.2736128 -1.9162407 0.5232263
-3.1024924 -2.8109484 0.5240853
-2.9074285 -2.7356185 0.5244411
-2.7480274 -2.6374788 0.5253614
-2.7100001 -2.6092019 0.5253817
-3.1396029 -2.8193706 0.5254297
-2.7780082 -2.6583032 0.5258128
-2.3748463 -2.2184335 0.5260070
-2.9497426 -2.7552047 0.5266635
-2.3574726 -2.1859455 0.5272828
-2.2857370 -1.9967405 0.5285449
-2.6732438 -2.5792084 0.5288144
-2.2981944 -2.0433010 0.5294705
-2.6276077 -2.5391267 0.5298318
-2.9909918 -2.7709795 0.5304638
-2.4866577 -2.3888685 0.5305245
-3.0701020 -2.7982971 0.5306698
-2.8212624 -2.6850799 0.5309736
-3.0238819 -2.7829350 0.5316372
-2.2644370 -1.8935124 0.5326642
-2.3979653 -2.2628448 0.5326777
-2.3403517 -2.1557548 0.5338012
-2.5887579 -2.5021171 0.5351964
-2.4218994 -2.3019443 0.5352419
-2.7300149 -2.6229210 0.5352456
-2.3230241 -2.1181549 0.5353225
-2.4583954 -2.3535952 0.5364684
-2.2690413 -1.9399296 0.5369614
-2.6540991 -2.5622700 0.5370152
-2.5162493 -2.4256260 0.5382144
-2.3036930 -2.0733041 0.5383373
-2.5406710 -2.4526718 0.5384926
-2.8893865 -2.7215139 0.5392527
-2.4375402 -2.3260225 0.5392752
-2.9300891 -2.7413176 0.5396531
-2.3804785 -2.2384450 0.5407699
-2.8514792 -2.7005326 0.5412472
-3.1191621 -2.8059320 0.5420050
-2.9716110 -2.7585946 0.5420146
-2.2849654 -2.0224857 0.5424333
-2.7966536 -2.6668889 0.5425317
-2.7639716 -2.6451863 0.5425781
-2.5612965 -2.4749951 0.5431867
-2.2710652 -1.9746791 0.5432577
-2.3106826 -2.0973731 0.5434529
-2.3608309 -2.2053084 0.5437956
-2.6977780 -2.5972773 0.5439279
-3.0955004 -2.7984144 0.5440777
-2.4721493 -2.3740884 0.5444408
-3.0512351 -2.7853091 0.5453859
-2.6078866 -2.5205377 0.5468769
-2.4969585 -2.4047721 0.5469392
-2.4051276 -2.2819328 0.5477108
-2.3259606 -2.1384849 0.5483195
-2.9110362 -2.7290786 0.5483444
-3.0073158 -2.7689869 0.5492469
-2.3464694 -2.1821764 0.5498654
-2.6386048 -2.5481164 0.5510259
-2.2870067 -2.0452064 0.5517550
-2.7465005 -2.6309977 0.5530801
-2.6796787 -2.5820223 0.5531067
-2.7182691 -2.6114707 0.5535413
-2.2483217 -1.8808227 0.5536289
-2.8327442 -2.6858382 0.5541382
-2.9498673 -2.7442968 0.5545919
-2.5771372 -2.4914112 0.5553116
-2.5280508 -2.4411066 0.5558304
-3.0770137 -2.7879046 0.5558933
-2.2504160 -1.9079034 0.5567380
-2.4244518 -2.3141080 0.5570234
-2.2586771 -1.9546360 0.5570483
-2.3323660 -2.1602810 0.5571353
-2.8731182 -2.7070638 0.5574180
-2.7824564 -2.6541444 0.5575917
-2.2710677 -2.0045411 0.5576244
-2.3674251 -2.2269714 0.5584374
-2.4483583 -2.3473495 0.5590860
-2.3859171 -2.2576844 0.5593591
-3.0292552 -2.7717317 0.5596317
-2.2973116 -2.0852551 0.5602667
-2.4826321 -2.3904316 0.5605641
-2.5486919 -2.4631089 0.5609821
-2.3122263 -2.1214856 0.5613152
-2.6617776 -2.5669507 0.5615893
-3.1119301 -2.7934020 0.5622771
-2.9854001 -2.7553627 0.5625124
-2.6227992 -2.5338648 0.5634099
-2.8140005 -2.6720688 0.5638393
-2.8971308 -2.7168064 0.5640053
-2.5100281 -2.4229906 0.5645828
-2.2601449 -1.9799628 0.5649930
-2.9300664 -2.7314043 0.5662426
-2.5959305 -2.5091904 0.5666131
-2.2731485 -2.0271578 0.5666920
-2.2474906 -1.9300074 0.5667237
-2.3512042 -2.2042467 0.5674508
-3.0568238 -2.7759392 0.5681371
-2.7001011 -2.5953808 0.5689133
-2.8545243 -2.6934235 0.5692401
-2.4077271 -2.2952677 0.5698363
-2.4627742 -2.3685406 0.5703838
-2.7653571 -2.6400130 0.5707565
-2.2837484 -2.0639527 0.5711456
-2.7346622 -2.6191147 0.5717520
-2.3372123 -2.1830191 0.5741072
-3.0129112 -2.7592497 0.5746654
-2.3161350 -2.1420646 0.5747649
-2.5650741 -2.4801309 0.5750707
-2.2985406 -2.1046414 0.5751210
-2.3932007 -2.2762698 0.5751305
-2.6429111 -2.5502095 0.5752007
-2.4346120 -2.3344411 0.5752846
-2.2365405 -1.9003870 0.5755005
-2.3720601 -2.2442568 0.5761112
-3.0952364 -2.7816071 0.5771099
-2.9606647 -2.7390900 0.5780440
-2.6797339 -2.5789164 0.5783297
-2.4961105 -2.4089675 0.5788707
-2.2472840 -1.9608148 0.5794266
-2.8334063 -2.6786426 0.5799697
-2.5357783 -2.4511255 0.5800391
-2.7989196 -2.6586588 0.5802239
-2.2236172 -1.8235441 0.5829568
-2.2710798 -2.0457325 0.5830185
-2.2562722 -2.0032089 0.5836708
-3.0371531 -2.7625686 0.5837360
-2.8832056 -2.7031664 0.5838794
-2.6103320 -2.5218715 0.5840393
-2.4165481 -2.3128571 0.5841575
-2.2243948 -1.8494088 0.5848599
-2.9138764 -2.7166720 0.5852758
-2.7170997 -2.6045415 0.5853095
-2.4765098 -2.3876639 0.5854051
-2.2848765 -2.0834679 0.5855209
-2.3564295 -2.2238267 0.5857663
-2.9934700 -2.7475757 0.5858081
-3.0732678 -2.7708555 0.5862855
-2.3227827 -2.1649199 0.5867903
-2.6614422 -2.5637025 0.5871565
-2.5840239 -2.4980544 0.5873917
-2.2367726 -1.9387252 0.5876138
-2.3027679 -2.1262345 0.5879407
-2.4489166 -2.3557798 0.5880649
-2.9414612 -2.7269759 0.5891348
-2.5142236 -2.4294547 0.5891825
-2.2244441 -1.8776032 0.5895661
-2.7541583 -2.6285281 0.5896484
-2.7802183 -2.6439633 0.5927683
-2.5523732 -2.4682361 0.5928002
-2.3395960 -2.2001335 0.5932787
-2.8548576 -2.6857546 0.5936435
-2.2587023 -2.0270673 0.5936953
-2.6306437 -2.5384474 0.5938930
-2.6970577 -2.5890864 0.5939038
-2.2439602 -1.9814939 0.5943014
-2.4003569 -2.2948583 0.5961999
-2.8166329 -2.6643538 0.5963096
-2.2244195 -1.9048182 0.5964124
-3.0210420 -2.7502644 0.5985749
-2.3086202 -2.1479796 0.5997209
-2.4621164 -2.3738935 0.5998586
-2.2714461 -2.0675408 0.6000947
-2.7364140 -2.6145262 0.6001439
-2.3711943 -2.2542134 0.6001700
-2.9632263 -2.7300166 0.6006443
-2.4878973 -2.4024619 0.6011292
-2.2860670 -2.1031017 0.6017555
-2.4297168 -2.3355703 0.6019021
-2.3851086 -2.2759117 0.6027775
-3.0568458 -2.7581646 0.6029726
-2.2097916 -1.8397030 0.6030902
-2.2312309 -1.9572021 0.6036536
-2.5987048 -2.5108033 0.6046812
-2.6792260 -2.5742468 0.6052052
-2.8996929 -2.7023983 0.6055848
-2.5708221 -2.4855557 0.6056051
-2.5323840 -2.4493276 0.6056567
-2.8751259 -2.6912919 0.6059166
-2.2458003 -2.0073573 0.6060905
-2.3259517 -2.1844235 0.6063256
-2.6521944 -2.5537876 0.6073893
-2.3563692 -2.2354492 0.6080028
-2.9908602 -2.7363439 0.6080415
-2.9235248 -2.7115678 0.6080822
-2.4121500 -2.3145830 0.6087039
-2.8385918 -2.6720194 0.6093488
-2.2101917 -1.8688396 0.6093968
-2.7190269 -2.6007128 0.6107650
-2.2588166 -2.0493825 0.6110079
-2.5029734 -2.4198636 0.6110798
-2.7956059 -2.6482149 0.6111309
-2.7685295 -2.6322167 0.6114379
-2.4429395 -2.3538175 0.6121074
-2.2941976 -2.1296004 0.6123652
-2.6181865 -2.5263025 0.6146209
-2.2186678 -1.9300893 0.6146239
-2.2324809 -1.9824085 0.6158567
-2.3421483 -2.2176188 0.6173608
-2.3106974 -2.1647937 0.6176232
-2.9474216 -2.7165972 0.6180204
-2.4750061 -2.3906862 0.6186779
-2.6986802 -2.5853531 0.6189921
-2.2465041 -2.0280737 0.6192397
-2.5477189 -2.4641012 0.6197838
-2.2717355 -2.0897019 0.6200764
-3.0351170 -2.7430146 0.6203171
-2.8173244 -2.6571539 0.6206139
-2.3957691 -2.2966209 0.6206895
-2.5186117 -2.4362800 0.6208121
-2.2072479 -1.8948798 0.6214894
-2.5855784 -2.4982504 0.6218729
-2.6369066 -2.5400902 0.6223618
-2.7484244 -2.6169699 0.6224450
-3.0108935 -2.7349092 0.6230070
-2.8593145 -2.6774281 0.6232496
-2.9709688 -2.7222776 0.6235188
-2.2806932 -2.1128695 0.6250927
-2.3699624 -2.2627805 0.6255464
-2.4284280 -2.3392368 0.6260005
-2.8904774 -2.6904508 0.6262179
-2.4556528 -2.3708684 0.6265323
-2.6699754 -2.5638446 0.6269342
-2.2193182 -1.9632560 0.6284946
-2.3274113 -2.1996280 0.6286331
-2.2970310 -2.1477457 0.6290152
-2.2338844 -2.0078288 0.6296510
-2.9160317 -2.6990987 0.6303314
-2.5660970 -2.4807046 0.6303437
-2.1891043 -1.8208003 0.6306745
-2.2581133 -2.0695570 0.6311500
-2.3545250 -2.2431493 0.6315353
-2.7853845 -2.6362046 0.6323019
-2.8389965 -2.6642792 0.6324122
-2.4934055 -2.4114807 0.6327572
-2.4116944 -2.3206100 0.6331700
-2.1948177 -1.8776099 0.6336527
-2.6054224 -2.5139639 0.6340809
-2.7175779 -2.5944426 0.6348749
-2.2092001 -1.9402099 0.6353279
-2.5346928 -2.4520160 0.6363412
-2.9916057 -2.7218051 0.6375522
-2.9443613 -2.7056995 0.6400185
-2.6891335 -2.5746022 0.6402127
-2.8077695 -2.6457795 0.6404655
-2.3076039 -2.1740268 0.6405382
-2.6545664 -2.5503854 0.6406191
-2.1852173 -1.8456347 0.6411227
-2.7635615 -2.6213044 0.6411412
-2.1775157 -1.7965048 0.6416787
-3.0277206 -2.7302575 0.6417823
-2.2442813 -2.0484324 0.6418260
-2.3850375 -2.2891198 0.6418914
-2.2828731 -2.1305706 0.6424401
-2.4420938 -2.3580255 0.6427059
-2.4668561 -2.3849427 0.6428783
-2.6278354 -2.5304120 0.6430601
-2.3363803 -2.2211859 0.6437320
-2.1981486 -1.9175686 0.6437367
-2.2623885 -2.0914299 0.6440364
-2.5132823 -2.4315608 0.6442193
-2.8741609 -2.6761794 0.6444193
-2.7395000 -2.6059242 0.6445362
-2.2207202 -1.9935985 0.6447889
-2.9681911 -2.7107341 0.6458119
-2.5830465 -2.4945634 0.6461974
-2.5524070 -2.4677973 0.6493867
-2.8996631 -2.6844774 0.6497006
-2.3601405 -2.2585014 0.6506990
-2.2312855 -2.0292126 0.6511745
-2.3210693 -2.2018316 0.6521825
-2.2920093 -2.1540552 0.6526330
-2.4224565 -2.3375292 0.6527778
-2.3986254 -2.3091659 0.6533207
-2.4840878 -2.4034495 0.6538870
-2.1850220 -1.8885504 0.6540163
-2.8510266 -2.6616297 0.6550285
-2.8289455 -2.6512263 0.6554104
-2.2691865 -2.1143513 0.6556987
-2.7083954 -2.5838793 0.6557860
-2.2072526 -1.9687253 0.6561008
-2.7832177 -2.6278049 0.6563061
-2.9262160 -2.6914534 0.6570399
-2.6741255 -2.5608239 0.6574273
-2.2457786 -2.0683763 0.6574779
-2.1980161 -1.9430104 0.6576286
-3.0039079 -2.7151101 0.6576648
-2.1761644 -1.8633004 0.6594122
-2.6034398 -2.5095969 0.6597761
-2.4536883 -2.3725481 0.6598770
-2.5329401 -2.4502085 0.6610356
-2.1623586 -1.7660005 0.6614209
-2.6452949 -2.5400017 0.6619183
-2.3420412 -2.2371333 0.6622485
-2.5004901 -2.4198659 0.6632555
-2.2175639 -2.0090398 0.6635237
-2.7591629 -2.6120071 0.6643663
-2.3724697 -2.2791256 0.6649235
-2.5704792 -2.4824487 0.6649609
-2.1855655 -1.9171637 0.6650601
-2.3008133 -2.1763611 0.6655760
-2.9539142 -2.6961671 0.6659729
-2.8052984 -2.6358822 0.6659944
-2.7349682 -2.5972548 0.6667741
-2.2325258 -2.0495022 0.6677042
-2.6237381 -2.5237932 0.6679248
-2.8783553 -2.6684244 0.6679347
-2.2530138 -2.0926412 0.6681877
-2.4346359 -2.3531666 0.6686728
-2.2747014 -2.1340626 0.6696658
-2.6930302 -2.5705437 0.6699922
-2.4089258 -2.3249471 0.6714184
-2.4711779 -2.3914960 0.6717920
-2.5502729 -2.4646883 0.6743597
-2.3242981 -2.2164980 0.6744035
-2.2033293 -1.9876389 0.6747753
-2.1615014 -1.8356417 0.6748120
-2.9112760 -2.6782032 0.6748644
-2.3549169 -2.2591773 0.6750369
-2.9921306 -2.7028949 0.6751752
-2.1538034 -1.7865112 0.6753733
-2.1706537 -1.8840200 0.6756015
-2.5165559 -2.4350942 0.6762266
-2.1928854 -1.9599499 0.6762857
-2.3916436 -2.3057649 0.6764888
-2.2870118 -2.1596203 0.6767151
-2.8434045 -2.6499718 0.6768992
-2.5905420 -2.4968751 0.6795979
-2.6646590 -2.5498625 0.6798981
-2.7147636 -2.5818868 0.6799856
-2.7782433 -2.6172048 0.6807449
-2.2593850 -2.1142918 0.6813299
-2.2185323 -2.0316080 0.6815266
-2.9348139 -2.6826050 0.6818735
-2.2375412 -2.0733697 0.6822990
-2.3091580 -2.1971809 0.6827084
-2.4877236 -2.4082120 0.6835016
-2.4493062 -2.3701122 0.6837828
-2.6407821 -2.5327369 0.6847776
-2.1713480 -1.9075971 0.6856399
-2.8205026 -2.6360555 0.6857539
-2.8663975 -2.6559051 0.6859448
-2.5339173 -2.4500541 0.6862667
-2.1596761 -1.8643746 0.6865342
-2.1779634 -1.9313531 0.6867527
-2.4212007 -2.3409724 0.6868984
-2.1493944 -1.8133860 0.6871627
-2.9644480 -2.6887087 0.6872933
-2.3757556 -2.2887368 0.6873278
-2.7490028 -2.5993928 0.6881125
-2.3389999 -2.2423453 0.6885386
-2.2049955 -2.0078695 0.6888863
-2.5673060 -2.4776049 0.6889852
-2.6100303 -2.5102778 0.6890838
-2.8897948 -2.6638197 0.6892082
-2.7997418 -2.6240387 0.6918831
-2.6865931 -2.5611070 0.6926595
-2.1908826 -1.9781353 0.6934561
-2.2703856 -2.1417061 0.6943608
-2.2444111 -2.0958660 0.6946427
-2.4008821 -2.3193530 0.6954567
-2.4700832 -2.3914910 0.6962733
-2.1383279 -1.7833572 0.6963364
-2.2238730 -2.0573888 0.6966127
-2.3587748 -2.2703059 0.6971866
-2.9204072 -2.6703648 0.6975113
-2.5030590 -2.4223808 0.6989763
-2.9871259 -2.6891445 0.6989791
-2.2934111 -2.1812122 0.6998065
-2.1454826 -1.8387206 0.7001892
-2.5510884 -2.4632673 0.7008480
-2.3217083 -2.2226168 0.7010581
-2.7321360 -2.5860637 0.7011363
-2.1787325 -1.9560373 0.7011605
-2.8407859 -2.6391291 0.7012329
-2.6578181 -2.5406184 0.7012855
-2.1580617 -1.8932935 0.7016818
-2.9489618 -2.6769862 0.7020924
-2.7711686 -2.6063861 0.7020993
-2.6284350 -2.5209601 0.7021102
-2.4362096 -2.3582173 0.7029802
-2.7106322 -2.5731070 0.7034922
-2.5921947 -2.4947108 0.7037783
-2.2111712 -2.0376467 0.7047463
-2.2525955 -2.1177049 0.7051305
-2.5209776 -2.4378248 0.7054532
-2.1645142 -1.9261010 0.7075800
-2.1920270 -1.9977546 0.7076967
-2.3064424 -2.2037479 0.7077824
-2.2772895 -2.1604091 0.7086455
-2.8729504 -2.6485416 0.7088159
-2.1479746 -1.8712305 0.7088272
-2.8182543 -2.6259800 0.7094299
-2.4861063 -2.4066077 0.7095062
-2.1274556 -1.7592576 0.7098590
-2.4525681 -2.3750227 0.7102045
-2.3867376 -2.3061293 0.7107242
-2.3431606 -2.2540434 0.7116005
-2.4126096 -2.3343847 0.7120176
-2.8980482 -2.6557472 0.7125422
-2.5733822 -2.4795290 0.7125628
-2.2300016 -2.0827178 0.7127181
-2.3689880 -2.2863039 0.7137027
-2.7520386 -2.5928575 0.7137261
-2.7952009 -2.6137224 0.7143773
-2.1212044 -1.7362952 0.7147153
-2.6789847 -2.5510419 0.7147193
-2.6125251 -2.5072264 0.7155409
-2.2611712 -2.1387078 0.7168681
-2.1323639 -1.8285009 0.7183287
-2.1780103 -1.9765161 0.7188450
-2.5378576 -2.4509148 0.7200365
-2.1521281 -1.9081051 0.7205120
-2.6478687 -2.5299270 0.7207910
-2.2162407 -2.0615366 0.7208710
-2.9241493 -2.6600214 0.7209385
-2.1983481 -2.0250555 0.7213810
-2.1666622 -1.9526488 0.7224876
-2.4687659 -2.3908527 0.7229196
-2.7006375 -2.5618598 0.7233545
-2.8576044 -2.6363667 0.7234569
-2.2375588 -2.1030010 0.7236817
-2.5044309 -2.4226353 0.7237924
-2.3269246 -2.2368235 0.7242609
-2.4267022 -2.3499552 0.7243175
-2.7245241 -2.5744571 0.7257427
-2.2843980 -2.1786264 0.7259241
-2.5577479 -2.4657625 0.7265111
-2.1211022 -1.8032306 0.7274730
-2.1416602 -1.8865088 0.7275913
-2.5913804 -2.4902643 0.7279938
-2.1323523 -1.8565357 0.7285108
-2.3543936 -2.2717540 0.7289753
-2.3992720 -2.3219247 0.7290309
-2.7735629 -2.5982129 0.7291739
-2.8349355 -2.6247484 0.7300819
-2.3074070 -2.2127942 0.7317481
-2.8811817 -2.6412075 0.7319749
-2.6295042 -2.5153342 0.7321565
-2.3782475 -2.2994283 0.7331215
-2.4871613 -2.4072476 0.7337787
-2.2698259 -2.1608199 0.7341364
-2.4466788 -2.3699829 0.7343570
-2.1819403 -2.0031271 0.7343896
-2.2021689 -2.0449811 0.7347612
-2.6691417 -2.5399270 0.7348447
-2.5211874 -2.4358290 0.7354931
-2.2456270 -2.1236664 0.7355322
-2.1087808 -1.7570436 0.7357122
-2.1522437 -1.9315587 0.7359720
-2.8072667 -2.6106288 0.7366768
-2.2229391 -2.0855269 0.7371459
-2.7444045 -2.5803311 0.7393503
-2.1214455 -1.8368801 0.7394949
-2.3378753 -2.2544138 0.7404858
-2.1025150 -1.7340801 0.7405524
-2.1688413 -1.9798460 0.7413327
-2.9098843 -2.6456002 0.7414460
-2.4132414 -2.3374658 0.7414994
-2.5757480 -2.4765908 0.7427579
-2.6114724 -2.5010949 0.7429213
-2.5441015 -2.4530280 0.7438214
-2.1398310 -1.9087075 0.7438878
-2.1074399 -1.7881375 0.7441672
-2.9472080 -2.6535687 0.7445107
-2.6901659 -2.5497460 0.7449065
-2.1883497 -2.0261889 0.7449189
-2.2555615 -2.1439940 0.7454724
-2.6490104 -2.5247956 0.7458143
-2.4630027 -2.3852440 0.7458757
-2.0948684 -1.7031369 0.7460329
-2.2903090 -2.1941454 0.7460671
-2.8566053 -2.6260410 0.7463415
-2.7141736 -2.5625874 0.7464172
-2.1115636 -1.8159715 0.7473422
-2.3196324 -2.2335086 0.7473661
-2.2310866 -2.1064068 0.7476497
-2.2078202 -2.0666327 0.7482057
-2.5049220 -2.4216279 0.7482101
-2.1553711 -1.9560166 0.7484240
-2.4327669 -2.3567395 0.7494706
-2.1210553 -1.8602370 0.7499283
-2.7863316 -2.5962904 0.7500636
-2.3636699 -2.2858323 0.7503625
-2.3901308 -2.3145515 0.7525163
-2.2752377 -2.1761637 0.7533513
-2.8358594 -2.6153221 0.7534261
-2.1276487 -1.8879807 0.7535829
-2.8920456 -2.6339055 0.7541118
-2.7621859 -2.5829505 0.7562849
-2.6310147 -2.5109276 0.7563131
-2.0882131 -1.7120885 0.7565779
-2.5958667 -2.4877237 0.7572208
-2.0940253 -1.7574665 0.7576907
-2.4809573 -2.4004831 0.7582225
-2.1752859 -2.0109207 0.7585712
-2.3019602 -2.2140434 0.7599708
-2.5249777 -2.4364072 0.7600729
-2.6751831 -2.5365517 0.7607702
-2.1915518 -2.0444813 0.7608440
-2.3476572 -2.2692061 0.7609462
-2.1093456 -1.8391963 0.7612427
-2.2165590 -2.0887176 0.7613441
-2.4485045 -2.3716628 0.7616612
-2.7339305 -2.5674929 0.7616888
-2.5622690 -2.4635186 0.7628196
-2.2401404 -2.1287290 0.7632164
-2.8087141 -2.6003967 0.7635550
-2.1616064 -1.9866631 0.7638259
-2.3298627 -2.2494610 0.7638966
-2.1394006 -1.9355995 0.7651988
-2.4155146 -2.3407099 0.7657833
-2.9566255 -2.6453916 0.7658520
-2.2571016 -2.1554743 0.7671402
-2.0938002 -1.7914461 0.7673353
-2.6993150 -2.5480010 0.7675760
-2.8698525 -2.6201181 0.7680820
-2.9277224 -2.6367676 0.7681354
-2.1149157 -1.8739945 0.7689729
-2.3757883 -2.3010568 0.7694709
-2.6525344 -2.5208423 0.7700678
-2.0814836 -1.7354563 0.7703093
-2.4982734 -2.4141214 0.7705368
-2.0972149 -1.8169988 0.7712009
-2.1992388 -2.0654829 0.7713380
-2.2847364 -2.1949754 0.7718550
-2.5432718 -2.4484361 0.7720704
-2.6154556 -2.4971420 0.7727288
-2.7828252 -2.5856527 0.7734968
-2.4641355 -2.3852709 0.7748342
-2.3128396 -2.2311756 0.7750409
-2.1487209 -1.9690026 0.7751879
-2.8304341 -2.6034882 0.7755223
-2.2255360 -2.1110278 0.7755757
-2.3969322 -2.3230427 0.7757548
-2.5857216 -2.4771090 0.7769630
-2.2694327 -2.1761362 0.7771373
-2.4315765 -2.3559865 0.7774945
-2.1232437 -1.9107748 0.7777166
-2.7548976 -2.5715093 0.7779478
-2.0725697 -1.7021706 0.7780774
-2.0818910 -1.7697877 0.7792798
-2.3605369 -2.2858048 0.7813016
-2.1024438 -1.8571717 0.7820134
-2.7207881 -2.5538871 0.7822215
-2.1793261 -2.0375889 0.7824582
-2.8920345 -2.6197390 0.7824716
-2.3389419 -2.2627972 0.7832450
-2.5178818 -2.4281308 0.7833346
-2.2075133 -2.0867505 0.7841922
-2.1634386 -2.0086492 0.7842831
-2.6754306 -2.5296144 0.7847291
-2.1347232 -1.9490804 0.7850885
-2.2420820 -2.1410018 0.7852276
-2.2956563 -2.2124098 0.7852605
-2.8573276 -2.6077100 0.7858309
-2.4813784 -2.3987921 0.7862977
-2.0838960 -1.8031728 0.7875207
-2.5667257 -2.4621341 0.7876012
-2.8126800 -2.5912822 0.7878118
-2.0924429 -1.8349725 0.7880916
-2.6400339 -2.5084400 0.7881868
-2.1105883 -1.8933131 0.7901340
-2.4470786 -2.3694002 0.7908786
-2.6042160 -2.4860162 0.7911603
-2.3823867 -2.3090365 0.7917430
-2.4136581 -2.3393260 0.7918157
-2.1874347 -2.0583474 0.7928944
-2.1502478 -1.9897067 0.7939782
-2.0667296 -1.7316262 0.7939822
-2.6987713 -2.5387734 0.7944186
-2.5393995 -2.4417973 0.7952841
-2.7722726 -2.5722487 0.7953060
-2.5017879 -2.4142158 0.7956848
-2.3225615 -2.2459068 0.7956856
-2.2545717 -2.1622595 0.7960340
-2.2772910 -2.1917784 0.7963960
-2.1217527 -1.9299739 0.7965163
-2.2279103 -2.1242219 0.7966461
-2.0721390 -1.7826565 0.7989000
-2.4647588 -2.3840555 0.7994891
-2.7421400 -2.5574227 0.8002111
-2.8433725 -2.5952836 0.8020699
-2.6629340 -2.5172888 0.8025081
-2.7960676 -2.5786093 0.8030571
-2.2106727 -2.1015566 0.8033252
-2.0553345 -1.7079237 0.8033284
-2.3060578 -2.2281140 0.8033680
-2.1367233 -1.9702949 0.8033926
-2.1667443 -2.0283107 0.8034058
-2.0936455 -1.8657185 0.8038985
-2.5864620 -2.4715605 0.8043954
-2.4294235 -2.3535552 0.8046439
-2.3553492 -2.2824215 0.8050375
-2.6268095 -2.4963092 0.8051132
-2.1967322 -2.0811926 0.8063644
-2.8731562 -2.6022733 0.8064613
-2.3961140 -2.3229941 0.8084359
-2.1079179 -1.9104835 0.8085732
-2.5199359 -2.4257158 0.8086011
-2.0609944 -1.7585675 0.8093617
-2.0796137 -1.8318747 0.8094353
-2.5595508 -2.4528998 0.8101036
-2.7201760 -2.5434709 0.8103898
-2.1533398 -2.0094558 0.8107088
-2.0469379 -1.6793154 0.8109200
-2.4847252 -2.3989724 0.8111446
-2.6857552 -2.5265016 0.8114665
-2.2378637 -2.1445566 0.8122021
-2.3352924 -2.2621183 0.8122451
-2.2885723 -2.2091925 0.8125115
-2.0700956 -1.8070466 0.8129904
-2.1748329 -2.0493673 0.8136124
-2.3727481 -2.3004430 0.8136555
-2.8227668 -2.5830128 0.8137702
-2.1236918 -1.9520299 0.8140288
-2.2627468 -2.1784732 0.8161197
-2.7619270 -2.5591674 0.8166190
-2.4501570 -2.3707773 0.8167862
-2.0953225 -1.8885706 0.8168342
-2.6476416 -2.5043383 0.8181199
-2.6057888 -2.4802513 0.8187369
-2.0497945 -1.7395466 0.8202098
-2.4119569 -2.3375942 0.8207404
-2.3183380 -2.2445361 0.8214386
-2.0802878 -1.8561643 0.8225124
-2.5405666 -2.4373823 0.8225631
-2.2177083 -2.1201143 0.8232494
-2.1342212 -1.9830376 0.8243219
-2.7926540 -2.5677373 0.8247898
-2.0425104 -1.7139911 0.8248003
-2.7416944 -2.5474346 0.8253122
-2.5065928 -2.4133448 0.8253585
-2.8465027 -2.5842493 0.8259612
-2.1596944 -2.0312667 0.8265862
-2.0557468 -1.7811977 0.8267822
-2.5821576 -2.4636230 0.8269516
-2.1991062 -2.0948032 0.8270253
-2.7050722 -2.5303592 0.8272691
-2.1825409 -2.0695565 0.8274460
-2.3017496 -2.2270450 0.8274589
-2.6706781 -2.5132732 0.8280595
-2.4711486 -2.3863858 0.8285004
-2.6274745 -2.4900555 0.8289896
-2.1082407 -1.9332053 0.8293202
-2.0654754 -1.8242446 0.8299259
-2.2459104 -2.1608038 0.8308803
-2.0966041 -1.9084597 0.8312029
-2.4301643 -2.3528308 0.8314680
-2.3500894 -2.2787285 0.8318493
-2.3855357 -2.3129121 0.8319451
-2.0330390 -1.6883977 0.8320092
-2.1427141 -2.0047035 0.8320991
-2.2739208 -2.1956617 0.8324462
-2.5607887 -2.4483902 0.8351432
-2.2308738 -2.1422539 0.8357758
-2.0426273 -1.7571940 0.8374963
-2.3670565 -2.2953502 0.8375836
-2.7740677 -2.5552240 0.8383316
-2.0830558 -1.8851583 0.8385100
-2.7257664 -2.5353017 0.8391058
-2.5273080 -2.4252159 0.8394873
-2.1146996 -1.9562043 0.8396381
-2.0537246 -1.8048354 0.8409077
-2.4541867 -2.3717272 0.8409524
-2.3301924 -2.2588684 0.8414321
-2.6533709 -2.5002018 0.8415903
-2.4890761 -2.3977777 0.8417220
-2.6037896 -2.4729618 0.8419176
-2.8086102 -2.5642272 0.8432136
-2.4059776 -2.3313141 0.8444706
-2.0686951 -1.8547966 0.8449212
-2.2565940 -2.1775081 0.8450981
-2.6920350 -2.5177659 0.8452979
-2.2867024 -2.2124808 0.8455632
-2.0328842 -1.7362890 0.8460158
-2.1239870 -1.9793370 0.8462573
-2.2122285 -2.1210889 0.8473612
-2.7549728 -2.5432759 0.8481896
-2.1478115 -2.0237283 0.8482729
-2.1862753 -2.0849469 0.8487150
-2.3096707 -2.2381782 0.8490765
-2.1678160 -2.0567864 0.8495039
-2.0410954 -1.7824690 0.8508918
-2.0244873 -1.7133908 0.8516798
-2.5082530 -2.4096423 0.8520558
-2.5861988 -2.4596590 0.8530104
-2.5468220 -2.4353002 0.8530302
-2.0151041 -1.6494445 0.8534292
-2.1003958 -1.9387476 0.8536095
-2.6272793 -2.4823900 0.8539383
-2.0888386 -1.9152827 0.8540095
-2.4373465 -2.3568728 0.8543373
-2.1323237 -2.0011212 0.8555025
-2.6724305 -2.5047022 0.8559588
-2.4737198 -2.3844925 0.8559684
-2.3831706 -2.3103724 0.8565414
-2.3443783 -2.2736461 0.8571651
-2.0704524 -1.8771241 0.8579429
-2.7926601 -2.5522233 0.8580367
-2.2398060 -2.1599475 0.8582576
-2.0513839 -1.8282761 0.8601877
-2.7134683 -2.5213413 0.8604576
-2.2704001 -2.1960282 0.8605914
-2.0292087 -1.7575671 0.8607359
-2.2239934 -2.1405973 0.8613764
-2.4196980 -2.3418178 0.8616753
-2.3641473 -2.2926919 0.8623627
-2.7382398 -2.5302195 0.8637883
-2.5286219 -2.4208803 0.8641013
-2.0395994 -1.8031535 0.8652993
-2.1062111 -1.9603842 0.8654777
-2.1957809 -2.1041309 0.8655005
-2.5698164 -2.4467932 0.8657528
-2.2950702 -2.2240254 0.8668851
-2.6094546 -2.4690190 0.8668988
-2.3246691 -2.2544776 0.8676425
-2.0088260 -1.6806898 0.8680119
-2.0174971 -1.7311295 0.8684755
-2.1520317 -2.0418252 0.8685001
-2.6496756 -2.4892174 0.8685110
-2.0577056 -1.8586475 0.8687804
-2.0747211 -1.8997328 0.8698265
-2.4016114 -2.3259398 0.8698402
-2.6938065 -2.5091235 0.8705497
-2.4911048 -2.3943893 0.8705862
-2.7758091 -2.5402904 0.8712215
-2.2540769 -2.1791972 0.8715815
-2.1710870 -2.0714485 0.8718043
-2.4564456 -2.3692974 0.8718344
-2.1372011 -2.0198322 0.8719836
-1.9997306 -1.6408567 0.8719898
-2.0286663 -1.7801333 0.8723536
-2.0876011 -1.9300418 0.8737557
-2.1158353 -1.9844807 0.8748737
-2.5484755 -2.4306737 0.8769286
-2.0084197 -1.7074160 0.8769307
-2.2074947 -2.1233811 0.8770696
-2.5125598 -2.4071609 0.8786970
-2.4365866 -2.3534883 0.8790149
-2.3096758 -2.2399257 0.8800076
-2.6326399 -2.4767197 0.8805177
-2.3802820 -2.3066645 0.8809813
-2.5886498 -2.4532071 0.8815378
-2.6722038 -2.4953803 0.8815463
-2.0377698 -1.8223342 0.8815610
-2.3422937 -2.2719908 0.8821729
-2.2365785 -2.1609053 0.8827343
-2.7528041 -2.5275180 0.8831254
-2.2798794 -2.2094955 0.8838230
-2.7225248 -2.5152951 0.8845653
-2.0932946 -1.9514478 0.8861417
-2.0444930 -1.8455893 0.8861446
-2.0134103 -1.7570434 0.8866901
-2.1238180 -2.0052484 0.8868553
-2.3615230 -2.2896758 0.8874923
-2.4158328 -2.3360525 0.8880328
-2.4781356 -2.3820622 0.8883167
-1.9960084 -1.6856724 0.8884390
-2.1817834 -2.0929314 0.8887664
-2.0595137 -1.8859418 0.8888193
-2.1543645 -2.0549533 0.8897516
-2.0731464 -1.9145972 0.8897750
-2.0245250 -1.7988028 0.8904277
-2.5679346 -2.4389160 0.8908365
-2.7894295 -2.5351161 0.8909635
-1.9871517 -1.6476071 0.8917111
-2.5326108 -2.4171470 0.8923368
-2.6094954 -2.4607619 0.8935651
-2.2189004 -2.1418091 0.8936973
-2.3265792 -2.2570127 0.8939815
-2.7009326 -2.5025548 0.8944619
-2.2634217 -2.1929071 0.8945755
-2.1343174 -2.0265046 0.8955905
-2.2940506 -2.2251999 0.8960127
-2.1019117 -1.9738889 0.8963074
-2.4988659 -2.3944144 0.8965600
-1.9792496 -1.6167176 0.8970264
-2.4579891 -2.3662613 0.8974550
-2.6543350 -2.4811972 0.8979503
-2.3981955 -2.3205613 0.8983640
-1.9984057 -1.7245928 0.8999981
-2.0119663 -1.7775042 0.9006203
-2.0796904 -1.9372202 0.9007078
-2.1930501 -2.1114319 0.9011974
-2.0454551 -1.8661589 0.9015062
-2.7412347 -2.5142036 0.9025848
-2.7710743 -2.5242059 0.9025983
-2.2458050 -2.1745870 0.9033408
-2.0254560 -1.8198014 0.9037256
-2.4383223 -2.3508502 0.9041833
-2.1635966 -2.0734229 0.9043519
-2.6821532 -2.4909478 0.9045827
-2.6321431 -2.4684737 0.9046708
-2.3764864 -2.3020771 0.9049786
-1.9823148 -1.6713379 0.9052643
-2.5920959 -2.4479968 0.9052960
-2.3471454 -2.2762338 0.9056981
-2.3113600 -2.2426597 0.9065152
-2.2783289 -2.2098015 0.9082991
-2.1119090 -1.9977588 0.9087032
-2.0003868 -1.7528437 0.9091418
-2.5534824 -2.4254761 0.9093349
-2.0328827 -1.8446407 0.9093637
-2.5198551 -2.4049925 0.9096445
-2.0574454 -1.8998300 0.9099846
-2.7207043 -2.5031185 0.9107544
-2.0882463 -1.9593342 0.9109587
-1.9848103 -1.7011266 0.9112252
-2.2282237 -2.1562081 0.9118790
-1.9732656 -1.6475107 0.9121071
-2.4763185 -2.3761087 0.9127112
-2.4150159 -2.3319936 0.9134023
-2.1409768 -2.0446327 0.9146475
-2.0664849 -1.9235292 0.9158092
-2.2094735 -2.1350859 0.9164791
-2.1763218 -2.0944767 0.9167394
-2.6145358 -2.4553937 0.9171720
-2.2582089 -2.1896051 0.9181265
-2.1222504 -2.0191859 0.9187550
-2.3323672 -2.2623357 0.9191483
-2.0104328 -1.8017134 0.9196618
-2.2960961 -2.2279358 0.9209120
-2.6640814 -2.4768924 0.9209507
-2.3618606 -2.2881645 0.9211154
-2.5027631 -2.3915430 0.9214507
-2.3910743 -2.3122815 0.9215577
-1.9876176 -1.7362178 0.9216344
-2.5775288 -2.4346254 0.9218849
-2.4564841 -2.3605206 0.9228217
-1.9572491 -1.5732226 0.9229713
-2.6994955 -2.4899872 0.9230062
-2.7834987 -2.5171977 0.9232780
-2.0979385 -1.9829114 0.9238799
-2.1906098 -2.1141572 0.9252736
-2.0359579 -1.8688605 0.9258538
-1.9695191 -1.6741797 0.9262642
-1.9995769 -1.7797777 0.9266200
-2.6430223 -2.4654368 0.9267105
-2.5376344 -2.4111649 0.9273528
-2.1564393 -2.0712648 0.9277815
-2.0164683 -1.8286093 0.9281927
-2.4364823 -2.3453373 0.9286987
-2.2412666 -2.1727022 0.9294001
-2.0729215 -1.9450687 0.9304135
-1.9527565 -1.5887974 0.9309236
-2.0454183 -1.8942162 0.9314367
-2.2721678 -2.2049422 0.9322798
-2.3131769 -2.2443005 0.9322873
-2.1081600 -2.0039156 0.9329922
-2.7342809 -2.4974251 0.9333035
-1.9707438 -1.7012590 0.9343759
-2.6013534 -2.4426405 0.9355219
-1.9864299 -1.7572543 0.9358081
-2.3473083 -2.2746122 0.9367342
-2.0836309 -1.9672514 0.9371958
-2.4859493 -2.3771417 0.9373161
-2.0546268 -1.9161380 0.9378525
-2.1408622 -2.0535514 0.9378625
-2.2197760 -2.1502255 0.9380061
-2.4107223 -2.3252116 0.9382455
-2.3763781 -2.2985228 0.9390938
-2.6841720 -2.4769569 0.9402699
-2.1735903 -2.0968584 0.9410603
-2.5619429 -2.4209904 0.9415131
-1.9733084 -1.7252149 0.9418429
-2.0028461 -1.8101899 0.9421950
-1.9516043 -1.6303151 0.9424087
-2.2005087 -2.1293494 0.9424361
-2.0190713 -1.8491605 0.9425810
-2.5158996 -2.3943601 0.9425997
-2.1245970 -2.0322403 0.9428544
-1.9553036 -1.6580086 0.9431769
-2.6245907 -2.4507572 0.9435322
-2.7152422 -2.4856733 0.9455686
-2.2941299 -2.2263708 0.9455768
-2.2524913 -2.1856868 0.9466726
-2.3279462 -2.2571310 0.9470459
-2.4577041 -2.3563206 0.9474477
-2.6600118 -2.4646588 0.9475084
-2.5864395 -2.4304854 0.9505463
-1.9898344 -1.7876682 0.9509980
-2.0256026 -1.8711227 0.9512316
-2.5439890 -2.4079443 0.9518350
-2.4287742 -2.3355400 0.9519957
-2.0906497 -1.9863043 0.9522854
-2.0591670 -1.9348656 0.9527623
-2.2354857 -2.1686010 0.9541015
-1.9735511 -1.7487687 0.9546882
-2.1558108 -2.0777118 0.9547424
-2.3615294 -2.2849085 0.9547965
-2.1093732 -2.0153387 0.9548121
-2.3921604 -2.3088460 0.9553689
-1.9580197 -1.7022597 0.9560423
-2.2704283 -2.2038461 0.9564544
-2.4996936 -2.3804545 0.9576913
-2.0349812 -1.8951837 0.9580035
-2.0033415 -1.8293189 0.9588196
-2.1844367 -2.1134476 0.9594976
-2.0696462 -1.9568333 0.9598529
-2.1322343 -2.0485527 0.9602172
-1.9361400 -1.6173905 0.9609793
-2.3098742 -2.2404592 0.9611143
-2.6985384 -2.4726557 0.9612964
-2.2135258 -2.1461343 0.9613383
-2.6086189 -2.4367516 0.9615171
-2.4781760 -2.3661816 0.9618478
-2.3436570 -2.2694751 0.9627460
-2.6395413 -2.4492243 0.9640748
-1.9416052 -1.6538173 0.9641179
-1.9611884 -1.7279957 0.9643768
-2.4115724 -2.3211550 0.9650613
-2.5698607 -2.4167925 0.9660381
-2.5218039 -2.3914052 0.9661845
-1.9905077 -1.8075565 0.9665996
-2.6757122 -2.4624189 0.9665999
-1.9743752 -1.7704132 0.9677314
-2.0090980 -1.8510321 0.9680040
-2.0435850 -1.9175805 0.9681993
-2.4465926 -2.3442089 0.9685153
-2.2870014 -2.2195388 0.9702623
-2.2463261 -2.1808366 0.9721627
-2.1662795 -2.0942134 0.9721692
-2.1972946 -2.1299654 0.9730155
-1.9451640 -1.6895752 0.9730857
-2.3780982 -2.2954429 0.9733220
-2.0920486 -1.9980346 0.9736176
-2.0213832 -1.8812456 0.9736252
-2.0772926 -1.9762461 0.9742498
-2.1457188 -2.0701819 0.9758333
-2.1154309 -2.0313212 0.9759527
-2.3257378 -2.2532964 0.9765391
-2.8047418 -2.4940824 0.9765953
-2.2293711 -2.1640188 0.9778500
-2.5902827 -2.4222715 0.9788506
-2.5482107 -2.4015385 0.9792384
-2.6595038 -2.4502724 0.9799713
-1.9614975 -1.7528639 0.9802125
-2.2635437 -2.1975758 0.9804169
-2.4300781 -2.3307656 0.9810273
-2.6270684 -2.4372290 0.9811623
-2.5057303 -2.3776365 0.9812421
-2.0535925 -1.9421761 0.9813050
-2.3570215 -2.2779566 0.9817876
-2.0297669 -1.9024154 0.9820993
-2.3976930 -2.3082555 0.9829530
-1.9225910 -1.6181475 0.9830984
-2.4700868 -2.3557715 0.9833057
-2.7260787 -2.4699141 0.9840142
-2.6993739 -2.4621430 0.9843967
-1.9329631 -1.6701838 0.9844598
-1.9925740 -1.8307407 0.9846862
-2.3026434 -2.2329188 0.9853266
-2.1797788 -2.1123149 0.9866312
-1.9742985 -1.7928716 0.9870362
-2.8092066 -2.4893106 0.9874767
-2.2123674 -2.1471850 0.9876043
-1.9472828 -1.7227849 0.9880020
-2.5282102 -2.3875040 0.9894551
-2.1277491 -2.0514574 0.9906509
-2.5698058 -2.4081606 0.9906744
-1.9224176 -1.6429307 0.9910348
-2.0012274 -1.8537794 0.9914010
-2.1555474 -2.0858845 0.9927760
-2.0973094 -2.0128240 0.9935325
-2.2797922 -2.2123894 0.9940030
-2.0374082 -1.9228250 0.9942820
-1.9349759 -1.6977372 0.9947219
-2.3390781 -2.2623098 0.9950254
-2.6085004 -2.4236807 0.9952342
-2.4502207 -2.3405383 0.9954222
-2.0114837 -1.8793369 0.9967674
-2.4896744 -2.3640328 0.9967892
-2.2397988 -2.1751835 0.9971116
-2.3761818 -2.2899634 0.9972988
-2.6463657 -2.4379637 0.9974808
-2.0790204 -1.9885565 0.9978263
-2.0624352 -1.9643581 0.9985527
-1.9602017 -1.7736962 0.9991476
-1.9087697 -1.5993716 0.9991526
-2.4152621 -2.3167296 0.9998531
-2.6739697 -2.4464496 1.0001250
-1.9481263 -1.7447932 1.0002909
-1.9780916 -1.8156317 1.0003887
-2.1959112 -2.1312277 1.0007689
-2.3176860 -2.2445164 1.0023173
-2.5488361 -2.3937216 1.0031012
-2.1088172 -2.0312659 1.0045010
-2.2602064 -2.1944545 1.0045977
-1.9099818 -1.6264954 1.0053854
-2.1382091 -2.0677841 1.0067477
-2.2235127 -2.1594668 1.0069416
-2.0199714 -1.9010625 1.0073738
-2.5111058 -2.3726266 1.0074736
-2.4696716 -2.3490352 1.0074811
-2.1692538 -2.1033952 1.0078483
-2.3950657 -2.3011752 1.0087805
-1.9180373 -1.6677406 1.0090747
-2.5859114 -2.4089904 1.0093798
-2.0453527 -1.9431421 1.0094994
-2.2953270 -2.2251390 1.0095925
-1.9851899 -1.8391014 1.0102475
-1.9342233 -1.7203522 1.0103717
-2.3587572 -2.2752106 1.0111908
-1.9648739 -1.7974467 1.0112734
-2.4371157 -2.3280501 1.0124500
-2.6263763 -2.4236860 1.0129926
-2.0881624 -2.0072280 1.0152997
-1.8943011 -1.5835444 1.0168604
-2.5330179 -2.3808311 1.0170314
-1.9939299 -1.8620831 1.0183500
-2.6572089 -2.4327538 1.0185902
-2.1194971 -2.0480221 1.0186298
-2.2761598 -2.2082785 1.0189369
-2.0691595 -1.9822043 1.0191256
-2.7364055 -2.4551761 1.0192158
-2.0293823 -1.9243213 1.0192955
-2.1513138 -2.0847859 1.0196605
-2.3346917 -2.2557052 1.0198483
-1.9481021 -1.7684086 1.0202452
-2.2073632 -2.1440509 1.0209053
-2.2448493 -2.1801644 1.0212019
-1.9204146 -1.6971769 1.0213041
-1.9057713 -1.6474108 1.0213321
-2.5676511 -2.3955156 1.0220297
-2.4947115 -2.3593070 1.0221876
-2.3779073 -2.2866531 1.0223751
-2.1851505 -2.1216340 1.0238590
-2.4131027 -2.3097560 1.0240478
-2.0045595 -1.8842274 1.0250121
-2.3127388 -2.2377808 1.0258738
-1.9702729 -1.8225317 1.0260275
-2.0518141 -1.9607448 1.0263259
-2.4558996 -2.3357261 1.0267466
-2.6040604 -2.4090823 1.0267664
-1.9356397 -1.7461304 1.0275690
-2.6819816 -2.4357871 1.0281880
-2.1004413 -2.0269757 1.0302981
-2.1343236 -2.0675492 1.0313364
-2.2247438 -2.1612497 1.0316780
-1.9071309 -1.6740184 1.0323033
-1.9525154 -1.7906104 1.0325398
-2.2609295 -2.1943552 1.0327777
-2.1679194 -2.1044646 1.0328589
-2.5160631 -2.3668643 1.0328929
-1.8935644 -1.6263528 1.0331076
-1.9797747 -1.8464211 1.0332153
-2.3533757 -2.2671923 1.0336504
-1.9217847 -1.7187151 1.0341601
-2.6433690 -2.4202070 1.0341962
-2.2947702 -2.2223591 1.0346342
-2.4361085 -2.3214170 1.0358585
-2.0131339 -1.9054291 1.0361259
-2.0363708 -1.9430234 1.0361820
-2.5519390 -2.3832360 1.0362460
-1.8790506 -1.5661406 1.0362665
-2.0782234 -2.0002830 1.0371301
-2.3955180 -2.2951638 1.0390724
-2.5863843 -2.3969069 1.0393611
-2.4787382 -2.3446859 1.0411418
-2.3295161 -2.2484431 1.0425041
-2.0622299 -1.9811727 1.0429104
-1.9886681 -1.8688584 1.0430877
-2.2001544 -2.1377760 1.0440208
-1.9368764 -1.7687646 1.0448376
-2.1161944 -2.0500079 1.0450454
-2.2420759 -2.1770452 1.0451393
-2.1510877 -2.0877710 1.0452744
-2.3728231 -2.2782477 1.0464315
-1.9583695 -1.8164554 1.0481774
-1.9221522 -1.7388385 1.0485979
-2.2762006 -2.2061284 1.0492465
-2.4195964 -2.3078957 1.0494097
-1.9992097 -1.8907097 1.0499962
-2.5363241 -2.3707400 1.0499964
-2.6105266 -2.4010474 1.0504709
-2.1798040 -2.1182727 1.0505769
-1.9075847 -1.7039672 1.0508119
-2.5049429 -2.3550809 1.0510638
-2.4583627 -2.3300619 1.0521685
-2.0905028 -2.0199649 1.0522280
-2.0463748 -1.9626858 1.0523846
-2.3115956 -2.2333571 1.0526990
-1.8791106 -1.6155990 1.0530023
-2.0193901 -1.9229416 1.0532272
-2.2176103 -2.1542383 1.0552434
-1.9668520 -1.8391494 1.0565508
-1.8615965 -1.5393347 1.0568271
-2.5672039 -2.3816805 1.0569230
-2.3481447 -2.2590458 1.0572072
-1.8957045 -1.6788401 1.0572768
-2.1342933 -2.0712860 1.0590430
-1.9441926 -1.7977742 1.0598277
-2.4394777 -2.3168944 1.0600036
-1.8850725 -1.6531947 1.0605935
-2.2571542 -2.1894184 1.0611707
-2.0704234 -1.9975848 1.0627461
-2.6895531 -2.4200433 1.0629369
-2.3934492 -2.2883031 1.0629925
-2.1625404 -2.1014900 1.0632553
-2.2934981 -2.2181487 1.0632844
-2.0294286 -1.9426125 1.0649463
-2.5894179 -2.3873280 1.0651134
-2.4775914 -2.3363574 1.0656858
-1.9076324 -1.7234832 1.0658262
-2.1051321 -2.0399384 1.0659147
-1.8606371 -1.5674461 1.0659355
-1.9232223 -1.7596865 1.0662447
-1.9752992 -1.8611268 1.0671481
-2.3284563 -2.2436411 1.0672790
-2.5249812 -2.3587743 1.0682621
-2.1937090 -2.1320156 1.0686980
-2.2335927 -2.1681242 1.0695330
-2.3671896 -2.2693975 1.0704649
-2.0024758 -1.9066754 1.0709722
-2.4138204 -2.2986810 1.0716150
-1.9508485 -1.8205013 1.0719435
-2.6437145 -2.4020386 1.0729824
-2.6169363 -2.3930163 1.0742431
-1.8716876 -1.6351285 1.0742986
-2.0504640 -1.9754811 1.0743997
-1.8938484 -1.6997656 1.0747840
-2.2752813 -2.2027620 1.0749869
-2.1458752 -2.0852072 1.0753362
-2.5509859 -2.3670424 1.0759530
-1.9306809 -1.7846412 1.0760123
-1.9876798 -1.8860564 1.0760908
-2.4987063 -2.3434667 1.0761467
-1.8599538 -1.5974676 1.0762908
-2.1215646 -2.0597869 1.0763396
-2.0864202 -2.0199519 1.0766247
-1.8833105 -1.6743065 1.0779545
-2.1771326 -2.1163747 1.0786763
-2.2102731 -2.1473135 1.0787689
-2.4548427 -2.3198138 1.0796538
-1.8409745 -1.5059353 1.0800735
-1.8472355 -1.5477608 1.0802101
-2.3132066 -2.2299452 1.0805746
-2.0124011 -1.9264870 1.0828383
-1.9075555 -1.7423785 1.0830320
-2.3492556 -2.2547108 1.0830793
-2.2493929 -2.1807774 1.0837972
-2.7195197 -2.4157146 1.0843207
-2.4336883 -2.3063346 1.0853752
-2.5759029 -2.3730605 1.0853945
-2.0351770 -1.9582210 1.0866831
-2.3999753 -2.2859937 1.0876720
-2.0618618 -1.9936011 1.0898607
-2.2952498 -2.2154708 1.0901167
-2.5214697 -2.3487537 1.0903381
-2.1603932 -2.1004557 1.0906619
-2.4818440 -2.3299637 1.0909864
-1.9591260 -1.8468571 1.0911744
-1.9733178 -1.8714022 1.0913560
-1.8942435 -1.7187110 1.0915962
-1.8476172 -1.5800321 1.0916467
-1.9154856 -1.7674715 1.0923498
-2.3795107 -2.2719670 1.0927441
-2.1000904 -2.0378204 1.0927673
-2.2299764 -2.1638300 1.0931794
-2.1943460 -2.1321671 1.0934503
-2.1337676 -2.0739801 1.0935007
-1.8583074 -1.6246396 1.0936324
-1.8697639 -1.6605024 1.0938776
-1.9349446 -1.8076180 1.0946199
-2.3316456 -2.2405725 1.0951498
-1.9962519 -1.9077785 1.0953193
-1.8818100 -1.6953129 1.0954394
-2.6499614 -2.3917418 1.0959984
-1.8335828 -1.5319974 1.0968132
-2.2670443 -2.1935429 1.0981660
-2.0811214 -2.0179282 1.1006088
-1.8366683 -1.5580095 1.1007117
-2.5495100 -2.3559336 1.1010548
-2.1160721 -2.0560970 1.1018559
-2.7045484 -2.4029428 1.1023411
-2.4187390 -2.2928416 1.1025106
-2.0168899 -1.9400238 1.1039982
-2.5023181 -2.3344450 1.1044853
-2.4509664 -2.3095581 1.1047250
-2.2104656 -2.1463075 1.1048406
-1.9440333 -1.8296750 1.1048472
-1.8966620 -1.7390089 1.1049462
-2.0435742 -1.9744755 1.1051382
-2.3142793 -2.2263893 1.1055471
-2.1780041 -2.1173673 1.1056112
-2.3631688 -2.2585716 1.1075635
-1.9819510 -1.8924358 1.1083471
-2.1483603 -2.0893109 1.1086149
-1.8172715 -1.4711165 1.1087500
-1.8693264 -1.6794784 1.1092440
-2.6806210 -2.3926330 1.1095616
-2.2483400 -2.1772342 1.1097369
-1.8440249 -1.6079186 1.1106207
-1.9223203 -1.7959693 1.1120027
-2.4731420 -2.3182738 1.1121330
-1.8815144 -1.7137053 1.1130876
-2.2899291 -2.2078025 1.1131441
-2.3937528 -2.2750403 1.1143679
-1.8576704 -1.6555994 1.1145285
-1.9575914 -1.8578559 1.1146377
-2.0640794 -2.0009800 1.1146476
-2.0021094 -1.9235894 1.1153440
-1.9083394 -1.7722504 1.1154342
-2.6358444 -2.3777621 1.1159900
-2.0942520 -2.0346952 1.1163649
-2.0286216 -1.9583116 1.1163681
-1.8163839 -1.4995739 1.1163873
-2.5277305 -2.3412018 1.1164593
-2.2292922 -2.1612886 1.1181789
-1.8213668 -1.5420124 1.1188225
-2.3332508 -2.2362651 1.1191379
-2.1945452 -2.1315365 1.1196161
-2.1320261 -2.0737336 1.1199152
-2.4370781 -2.2970914 1.1207452
-2.2652935 -2.1887244 1.1230031
-1.9309888 -1.8187551 1.1231612
-1.8298410 -1.5833164 1.1232572
-1.8451517 -1.6341939 1.1240401
-2.7019687 -2.3889148 1.1244429
-2.5581301 -2.3482104 1.1251066
-1.9682024 -1.8786316 1.1253261
-1.8952584 -1.7545594 1.1256807
-2.1623550 -2.1025681 1.1257497
-2.4159225 -2.2842130 1.1257583
-2.4934823 -2.3220585 1.1265025
-2.1140928 -2.0558969 1.1267354
-1.9420793 -1.8401016 1.1275464
-1.9872319 -1.9079098 1.1288553
-1.8037727 -1.4805876 1.1289758
-2.3742149 -2.2595714 1.1292359
-2.0768718 -2.0175712 1.1294519
-2.0497636 -1.9866678 1.1296115
-2.3120589 -2.2199047 1.1296699
-1.8676849 -1.6996594 1.1304193
-2.2138767 -2.1472391 1.1323155
-2.4588150 -2.3037037 1.1327828
-1.8092217 -1.5209159 1.1331279
-2.2470551 -2.1731646 1.1337203
-1.8564947 -1.6771110 1.1341064
-2.3533887 -2.2455367 1.1343320
-1.8171793 -1.5629037 1.1347712
-2.0107354 -1.9409083 1.1355727
-1.9088441 -1.7872256 1.1356689
-2.2875806 -2.2017345 1.1365199
-2.1786734 -2.1170954 1.1367221
-2.6117775 -2.3599853 1.1369973
-2.1456246 -2.0868900 1.1374160
-1.8452309 -1.6542924 1.1384300
-1.9518486 -1.8601751 1.1389645
-2.5160151 -2.3266540 1.1390383
-1.7944126 -1.4562150 1.1392338
-1.8810285 -1.7365351 1.1394895
-2.0961835 -2.0385009 1.1403403
-2.3993764 -2.2705896 1.1411575
-1.8296074 -1.6176130 1.1426329
-2.0256201 -1.9610663 1.1434240
-2.3305464 -2.2291472 1.1437994
-2.1286164 -2.0711276 1.1446958
-2.1977995 -2.1328618 1.1451804
-1.9956292 -1.9244016 1.1457070
-1.9282865 -1.8278925 1.1458670
-2.4422649 -2.2910518 1.1459432
-2.4788605 -2.3079460 1.1459898
-2.2316025 -2.1596192 1.1469063
-1.8049294 -1.5425781 1.1470530
-2.0640230 -2.0057341 1.1472586
-2.2668566 -2.1854398 1.1478812
-1.8192341 -1.5957463 1.1482975
-1.9683927 -1.8888724 1.1499923
-1.8880378 -1.7603477 1.1506039
-2.4210980 -2.2787159 1.1507346
-2.1115973 -2.0547949 1.1514654
-2.1626139 -2.1022517 1.1514759
-2.5427964 -2.3309471 1.1515649
-2.0392929 -1.9790719 1.1523399
-1.8573988 -1.6983862 1.1529663
-2.3092005 -2.2127937 1.1541105
-2.0799970 -2.0232619 1.1541850
-2.6283004 -2.3560316 1.1542443
-1.8308865 -1.6390605 1.1551800
-2.3849974 -2.2580075 1.1561395
-1.8670706 -1.7227727 1.1565450
-2.5976387 -2.3461206 1.1570438
-1.8064120 -1.5703402 1.1581006
-2.3629731 -2.2449152 1.1587289
-1.9091149 -1.8022911 1.1587728
-2.5017811 -2.3120532 1.1599309
-2.2160492 -2.1460501 1.1601600
-1.8427664 -1.6734995 1.1603998
-2.2860182 -2.1960836 1.1605771
-2.1828742 -2.1192418 1.1609583
-1.9366136 -1.8478091 1.1611947
-1.9818923 -1.9106887 1.1612281
-2.4622969 -2.2946938 1.1616530
-2.0082438 -1.9444772 1.1617595
-1.9535053 -1.8727773 1.1623346
-2.2514055 -2.1715937 1.1639763
-2.1424320 -2.0839697 1.1639812
-2.3431671 -2.2311610 1.1661199
-2.0944699 -2.0385961 1.1664331
-1.7754977 -1.4572912 1.1665494
-1.8937494 -1.7818751 1.1670221
-2.0522278 -1.9950898 1.1676011
-1.8743192 -1.7465267 1.1677014
-1.7854440 -1.5122313 1.1684185
-1.7940364 -1.5506078 1.1686158
-1.8172601 -1.6228489 1.1687201
-1.9227196 -1.8296692 1.1694332
-2.4093150 -2.2661651 1.1703143
-2.0260937 -1.9668928 1.1705185
-2.1249209 -2.0678296 1.1722279
-2.4381244 -2.2794427 1.1723823
-1.8297495 -1.6568853 1.1723863
-2.6196297 -2.3436351 1.1733295
-2.2006346 -2.1324587 1.1738336
-1.7753743 -1.4807202 1.1740369
-2.4848723 -2.2993380 1.1740729
-2.2329208 -2.1564971 1.1745952
-1.8461936 -1.6953432 1.1746109
-2.6485543 -2.3497741 1.1746297
-2.3235442 -2.2169738 1.1749301
-1.9679712 -1.8963350 1.1759930
-2.1663557 -2.1040892 1.1763052
-2.2707619 -2.1826325 1.1764691
-1.9943608 -1.9308678 1.1772021
-2.0722775 -2.0168307 1.1772463
-1.8573795 -1.7218423 1.1787823
-2.3028094 -2.2028347 1.1794729
-1.8046948 -1.6018496 1.1803072
-2.3868163 -2.2511180 1.1810686
-1.9407758 -1.8609022 1.1814954
-1.7944342 -1.5759368 1.1822614
-2.3622260 -2.2372624 1.1829235
-1.9045344 -1.8076875 1.1830477
-1.8787068 -1.7660277 1.1834970
-2.1092251 -2.0531962 1.1836033
-2.4645760 -2.2868265 1.1846030
-1.7805215 -1.5324781 1.1847380
-2.1850229 -2.1185585 1.1862114
-1.7624920 -1.4607318 1.1874766
-2.1502689 -2.0897855 1.1877547
-2.0095032 -1.9509941 1.1878259
-1.7697866 -1.5003689 1.1888135
-1.9528183 -1.8805880 1.1896713
-1.8168256 -1.6455383 1.1897973
-2.0874416 -2.0325353 1.1903528
-2.2178259 -2.1430066 1.1904425
-2.2521367 -2.1671086 1.1907325
-1.8322539 -1.6820284 1.1915543
-1.9241113 -1.8413658 1.1922014
-2.0407702 -1.9856966 1.1922885
-2.4203916 -2.2635253 1.1937926
-2.3428867 -2.2234599 1.1938680
-1.8055039 -1.6229106 1.1939250
-1.7820038 -1.5561528 1.1944155
-1.9816789 -1.9190198 1.1948435
-2.2888518 -2.1903369 1.1958423
-2.0596628 -2.0053795 1.1959552
-1.8864038 -1.7857888 1.1964266
-1.8411361 -1.7042594 1.1971554
-2.1299330 -2.0717917 1.1974142
-1.8571303 -1.7368644 1.1979628
-2.4944016 -2.2928331 1.1983288
-2.4455436 -2.2727653 1.1984438
-1.9651262 -1.9001764 1.2006527
-1.7498712 -1.4396363 1.2008739
-2.3232133 -2.2099124 1.2009973
-2.1693055 -2.1042648 1.2014781
-2.3781264 -2.2399079 1.2016401
-1.7894968 -1.5902578 1.2017994
-2.4015108 -2.2511015 1.2028984
-2.0230448 -1.9683008 1.2029822
-1.9392575 -1.8673238 1.2060946
-2.1981497 -2.1260177 1.2061464
-1.9954362 -1.9372811 1.2062459
-1.9074436 -1.8226995 1.2063178
-2.2369925 -2.1533843 1.2065366
-2.1015263 -2.0458240 1.2073886
-2.4732408 -2.2803930 1.2076713
-2.2703520 -2.1754761 1.2082533
-1.8177037 -1.6667884 1.2086798
-1.7392573 -1.4024226 1.2088942
-1.8656920 -1.7581335 1.2103217
-2.1457927 -2.0842538 1.2113303
-1.8058958 -1.6425618 1.2113554
-2.0795557 -2.0254291 1.2144085
-1.8263928 -1.6894409 1.2144514
-1.7543477 -1.4994135 1.2148347
-1.7750267 -1.5712487 1.2153819
-1.7928011 -1.6175348 1.2153898
-1.8426530 -1.7212645 1.2154389
-2.3613214 -2.2265018 1.2155432
-2.2188923 -2.1391864 1.2158164
-2.3065628 -2.1960317 1.2161621
-2.0479363 -1.9948696 1.2163081
-1.9223350 -1.8479954 1.2167132
-1.7640931 -1.5399742 1.2169030
-2.5757696 -2.3083760 1.2172277
-2.4219718 -2.2553242 1.2173006
-1.9525514 -1.8884332 1.2180656
-1.9768627 -1.9180193 1.2190280
-2.5231519 -2.2922305 1.2199734
-1.7343512 -1.4238012 1.2205108
-1.8930639 -1.8075540 1.2206692
-2.1828477 -2.1123226 1.2219472
-2.5469800 -2.2983290 1.2221488
-2.3898454 -2.2382947 1.2228780
-2.1295941 -2.0698378 1.2229610
-2.3415066 -2.2136677 1.2231045
-1.7391837 -1.4576040 1.2235775
-1.8728606 -1.7777868 1.2236451
-2.2554019 -2.1623494 1.2242855
-1.7800975 -1.5965554 1.2243877
-2.2881545 -2.1823981 1.2255477
-1.8503139 -1.7418450 1.2263045
-2.0303476 -1.9778722 1.2264654
-2.1640647 -2.0975236 1.2267064
-2.0048356 -1.9508959 1.2280557
-1.7410176 -1.4820679 1.2291006
-2.4582627 -2.2652251 1.2293158
-1.9370343 -1.8718204 1.2298940
-1.7248675 -1.4032261 1.2300172
-2.0624998 -2.0096375 1.2304138
-2.1005460 -2.0439876 1.2323395
-1.8054698 -1.6618709 1.2326687
-1.7613904 -1.5588657 1.2336840
-2.2379926 -2.1486139 1.2342012
-1.9098433 -1.8369172 1.2349884
-2.4822770 -2.2720649 1.2350202
-2.2066872 -2.1272927 1.2361738
-1.7508569 -1.5323158 1.2366536
-1.8145184 -1.6850118 1.2376962
-2.4102744 -2.2420140 1.2378711
-2.1451725 -2.0815791 1.2379558
-2.3237821 -2.1997056 1.2379910
-1.7258169 -1.4415439 1.2383775
-2.4347678 -2.2520971 1.2387836
-1.7926009 -1.6407568 1.2388779
-2.3691363 -2.2230200 1.2389396
-1.9583245 -1.8999588 1.2391021
-2.0805189 -2.0266033 1.2395990
-1.9856995 -1.9312261 1.2399728
-1.8793839 -1.7954176 1.2402659
-1.8265695 -1.7093850 1.2403162
-2.0457007 -1.9941440 1.2417021
-1.7803061 -1.6166979 1.2417335
-2.2729634 -2.1690228 1.2417700
-1.8594346 -1.7654729 1.2419735
-1.7665005 -1.5836962 1.2431761
-2.0166564 -1.9647926 1.2442247
-1.7276458 -1.4651940 1.2446289
-1.8921077 -1.8156415 1.2448977
-1.7382336 -1.5081997 1.2453479
-1.9221779 -1.8570095 1.2454664
-2.1884083 -2.1126322 1.2458225
-2.1161713 -2.0563434 1.2467287
-2.3910923 -2.2300994 1.2469285
-2.3465102 -2.2082234 1.2479621
-2.3015946 -2.1840709 1.2487015
-1.8345402 -1.7305407 1.2515681
-2.1622663 -2.0925545 1.2516247
-2.5126803 -2.2731535 1.2517083
-1.9437136 -1.8852159 1.2517122
-2.2251175 -2.1360989 1.2535830
-2.2551161 -2.1550588 1.2545704
-1.7487579 -1.5542461 1.2548090
-2.4647268 -2.2566646 1.2551407
-1.9984502 -1.9471189 1.2553411
-1.7966452 -1.6639571 1.2559817
-2.0679275 -2.0148731 1.2571458
-2.1351421 -2.0711583 1.2575752
-2.5369672 -2.2773051 1.2578723
-2.0963361 -2.0395111 1.2579985
-1.7244453 -1.4853576 1.2588302
-2.4796254 -2.2589249 1.2591310
-1.9737014 -1.9204874 1.2591397
-1.8134480 -1.6979076 1.2591564
-2.0322176 -1.9808415 1.2597565
-1.8664242 -1.7843703 1.2601922
-1.7665607 -1.6039923 1.2603542
-2.4197763 -2.2369593 1.2604399
-1.9008805 -1.8335304 1.2617484
-2.3768585 -2.2178473 1.2627506
-2.2865527 -2.1713218 1.2628823
-1.7817315 -1.6395357 1.2630022
-2.2073288 -2.1222011 1.2632791
-1.9571370 -1.9029060 1.2638437
-2.3202733 -2.1895227 1.2639535
-1.8796332 -1.8049331 1.2642041
-1.7535539 -1.5787905 1.2645682
-1.7133148 -1.4586553 1.2651536
-1.8431266 -1.7522034 1.2666458
-2.0511728 -1.9992707 1.2672233
-1.9289877 -1.8702969 1.2673215
-2.1790520 -2.1022878 1.2677569
-1.8215959 -1.7188560 1.2692062
-1.7338578 -1.5339190 1.2695946
-2.3436158 -2.1991980 1.2704243
-2.1161980 -2.0545351 1.2722709
-2.0146657 -1.9641227 1.2724735
-2.5809342 -2.2793943 1.2730077
-1.7231989 -1.5064093 1.2734521
-1.7023985 -1.4348445 1.2743155
-2.1497701 -2.0796212 1.2756299
-2.0808471 -2.0258069 1.2756910
-2.2388843 -2.1393697 1.2758355
-1.7973874 -1.6806933 1.2758890
-1.8535870 -1.7729115 1.2774597
-1.7401910 -1.5611682 1.2778736
-2.2711465 -2.1579755 1.2785683
-1.9866558 -1.9361520 1.2788596
-2.4029596 -2.2221972 1.2794337
-2.3049776 -2.1762089 1.2797844
-1.7843053 -1.6600370 1.2803609
-1.7641266 -1.6193353 1.2805051
-1.9091450 -1.8493088 1.2820854
-1.8884595 -1.8230393 1.2822677
-1.6855755 -1.3747873 1.2828639
-1.9447152 -1.8914268 1.2837662
-2.3647683 -2.2042587 1.2840504
-1.8672694 -1.7950452 1.2841316
-1.8286446 -1.7381894 1.2841669
-2.0334213 -1.9824479 1.2843104
-2.4263798 -2.2288476 1.2848429
-2.1953137 -2.1099574 1.2849285
-1.6903858 -1.4112949 1.2850402
-2.1001750 -2.0405308 1.2862394
-2.1326137 -2.0656027 1.2863374
-2.5028252 -2.2529798 1.2863967
-2.3285937 -2.1858279 1.2864844
-1.8052108 -1.7012143 1.2867855
-1.9613686 -1.9099905 1.2880614
-2.0633902 -2.0091346 1.2882422
-2.2214059 -2.1258141 1.2884421
-1.7005304 -1.4616572 1.2896341
-1.7218252 -1.5299274 1.2910871
-2.0018889 -1.9524824 1.2914503
-1.7082927 -1.4913973 1.2919398
-2.1690180 -2.0900687 1.2919460
-1.9237500 -1.8688672 1.2920601
-1.7693615 -1.6399249 1.2923254
-1.7499536 -1.6005404 1.2948247
-2.2564509 -2.1450363 1.2953826
-2.3905305 -2.2105293 1.2967553
-2.2871572 -2.1612649 1.2970596
-1.7377569 -1.5769082 1.2972681
-1.8412031 -1.7627509 1.2976870
-2.3502828 -2.1916535 1.2996638
-1.8132327 -1.7218348 1.3000242
-1.7257887 -1.5528645 1.3013768
-2.1503877 -2.0757564 1.3014969
-2.3142836 -2.1735165 1.3021037
-1.7827651 -1.6712345 1.3021264
-2.1172633 -2.0515597 1.3024178
-1.8762806 -1.8126623 1.3025438
-2.0205867 -1.9702038 1.3025629
-2.0786467 -2.0212847 1.3030712
-1.9831641 -1.9343965 1.3030841
-1.6711168 -1.3720792 1.3032121
-1.8954342 -1.8372148 1.3032416
-2.0458158 -1.9931087 1.3050105
-1.8555154 -1.7860275 1.3057963
-2.4130642 -2.2143883 1.3073397
-1.7555092 -1.6236295 1.3073892
-1.6781565 -1.4158988 1.3075605
-2.2089460 -2.1135858 1.3078756
-2.2378889 -2.1309781 1.3078825
-2.5192662 -2.2455049 1.3081871
-1.7078696 -1.5177972 1.3082433
-1.9491612 -1.8990673 1.3088530
-2.1883366 -2.1001979 1.3091620
-1.8248514 -1.7449778 1.3095542
-1.6843364 -1.4435690 1.3099767
-1.9103263 -1.8564193 1.3105357
-2.0979334 -2.0361860 1.3107536
-2.3740410 -2.1977239 1.3113929
-1.7911494 -1.6923274 1.3121993
-1.7689222 -1.6535847 1.3125571
-2.3359561 -2.1789846 1.3154200
-2.0029464 -1.9539449 1.3163904
-1.6938054 -1.4897992 1.3166203
-1.7381623 -1.5972419 1.3173391
-2.2780916 -2.1504938 1.3174104
-2.1347801 -2.0620693 1.3175737
-1.9287431 -1.8781733 1.3181137
-2.0619652 -2.0060599 1.3186068
-1.7124186 -1.5417885 1.3188792
-2.1700476 -2.0854357 1.3195137
-1.9650722 -1.9169701 1.3196317
-1.8393608 -1.7690692 1.3211630
-2.3013926 -2.1603687 1.3220157
-2.3964382 -2.2006638 1.3229966
-2.0336510 -1.9818522 1.3231074
-1.8055103 -1.7202688 1.3231966
-1.6589958 -1.3775575 1.3238822
-1.8637217 -1.8024404 1.3243547
-1.6822260 -1.4663156 1.3244336
-1.7229264 -1.5716372 1.3254287
-1.8836784 -1.8272709 1.3257500
-2.2263239 -2.1191614 1.3264560
-1.9843145 -1.9361813 1.3277150
-2.2603438 -2.1375022 1.3282902
-2.0820763 -2.0213167 1.3283571
-2.4313781 -2.2111998 1.3287270
-1.7736632 -1.6728048 1.3288141
-1.7440545 -1.6192281 1.3288733
-2.1155317 -2.0466468 1.3289416
-1.6956353 -1.5128813 1.3293482
-2.3614627 -2.1841954 1.3300885
-1.6599557 -1.4010612 1.3304183
-1.7555247 -1.6414694 1.3309089
-2.2052580 -2.1053394 1.3310507
-1.6700953 -1.4419243 1.3318066
-1.9407591 -1.8927795 1.3336884
-1.8227522 -1.7502207 1.3339731
-1.9038212 -1.8533418 1.3344408
-2.0154983 -1.9650773 1.3361200
-2.1535497 -2.0713377 1.3361218
-1.7855511 -1.6961628 1.3366155
-1.8487048 -1.7872720 1.3374535
-2.0494054 -1.9942975 1.3375550
-2.3197383 -2.1634476 1.3378424
-2.1835837 -2.0895336 1.3410473
-1.9209915 -1.8722034 1.3411260
-2.2887068 -2.1474487 1.3413308
-1.6795668 -1.4863026 1.3418952
-1.7297334 -1.6012528 1.3427741
-1.7091925 -1.5603933 1.3430058
-2.2429481 -2.1239027 1.3440024
-1.9659042 -1.9187363 1.3445056
-2.1354563 -2.0577448 1.3453259
-2.0688203 -2.0090271 1.3455063
-1.9988373 -1.9496545 1.3460063
-2.3841054 -2.1855501 1.3460757
-1.8710288 -1.8164856 1.3466190
-1.6570722 -1.4253386 1.3466603
-1.8060827 -1.7316389 1.3467402
-2.0991037 -2.0312877 1.3471126
-2.3442126 -2.1705780 1.3471549
-1.6680711 -1.4634319 1.3474941
-1.6945622 -1.5309749 1.3475845
-1.7598469 -1.6602480 1.3476135
-1.8890383 -1.8379630 1.3476440
-2.0326906 -1.9790916 1.3498983
-1.7429096 -1.6325874 1.3499595
-1.8314459 -1.7672431 1.3501992
-2.2219879 -2.1093089 1.3523589
-2.2662708 -2.1328421 1.3538355
-1.7154353 -1.5831675 1.3541353
-1.6421160 -1.3852374 1.3549933
-1.9481409 -1.9014299 1.3551518
-1.7713204 -1.6833690 1.3557126
-1.6339012 -1.3544256 1.3565474
-2.1689104 -2.0766719 1.3572054
-1.9078486 -1.8597663 1.3579424
-2.3069606 -2.1498025 1.3588361
-1.9806265 -1.9327114 1.3591978
-1.7864316 -1.7079864 1.3595181
-1.8558684 -1.8013043 1.3598425
-2.1190192 -2.0430395 1.3601407
-2.2013761 -2.0951299 1.3602396
-2.0152624 -1.9633949 1.3617931
-1.6799620 -1.5125138 1.3619007
-1.6967889 -1.5515238 1.3623092
-1.9286416 -1.8818907 1.3628125
-1.8155575 -1.7507668 1.3637048
-2.0516868 -1.9932135 1.3643517
-2.4206373 -2.1899215 1.3650978
-2.3324536 -2.1578877 1.3652515
-2.0817847 -2.0158242 1.3659479
-2.1502037 -2.0628694 1.3662744
-1.6664127 -1.4855451 1.3668220
-1.7224072 -1.6064024 1.3668351
-1.6445577 -1.4254170 1.3688123
-1.8761781 -1.8264945 1.3692559
-1.9624076 -1.9155557 1.3700848
-2.3597861 -2.1664992 1.3709783
-1.9984617 -1.9483476 1.3713485
-1.8398128 -1.7837444 1.3713965
-2.2878025 -2.1366605 1.3714495
-2.2407351 -2.1125457 1.3722554
-1.7554513 -1.6662822 1.3723092
-1.8929358 -1.8456001 1.3729461
-2.1031601 -2.0296074 1.3735952
-1.6280699 -1.3797195 1.3747022
-1.7971804 -1.7295471 1.3750903
-1.6826019 -1.5327796 1.3753158
-2.4309227 -2.1871158 1.3756493
-2.1864652 -2.0821953 1.3768318
-1.6537435 -1.4656959 1.3773131
-2.0301062 -1.9746032 1.3775842
-2.2676744 -2.1246052 1.3776529
-1.6193768 -1.3524818 1.3780354
-1.7731840 -1.6968300 1.3782355
-1.7028392 -1.5775039 1.3788281
-1.7382175 -1.6426637 1.3799748
-1.9145585 -1.8689118 1.3806653
-2.3179019 -2.1460536 1.3810719
-2.1309022 -2.0465326 1.3811590
-1.9440751 -1.8979938 1.3811850
-1.8615259 -1.8117921 1.3818662
-2.3904611 -2.1718096 1.3820200
-1.8243478 -1.7678360 1.3825015
-2.0655992 -2.0012774 1.3831393
-2.2109361 -2.0939472 1.3834856
-1.6651362 -1.5029570 1.3843986
-1.9803076 -1.9317091 1.3844535
-1.6317252 -1.4115446 1.3844969
-1.7209867 -1.6181630 1.3880984
-2.4494853 -2.1855659 1.3884175
-2.1679892 -2.0680096 1.3892755
-1.6879352 -1.5589942 1.3906278
-2.3416860 -2.1516192 1.3906829
-2.0869127 -2.0150508 1.3908510
-1.6401744 -1.4496693 1.3919765
-1.7077990 -1.5977144 1.3923933
-1.7827007 -1.7153704 1.3927588
-1.8794361 -1.8330644 1.3930458
-2.2340963 -2.1027459 1.3936339
-1.8051796 -1.7458371 1.3937028
-1.7560057 -1.6776791 1.3943553
-2.3005458 -2.1336535 1.3944051
-1.8396228 -1.7886724 1.3952277
-2.0144335 -1.9602913 1.3955855
-2.0453687 -1.9842710 1.3960390
-1.9581809 -1.9111893 1.3970625
-2.1147258 -2.0325497 1.3981254
-1.8957286 -1.8505250 1.3985281
-2.1489840 -2.0541930 1.3985584
-1.9304428 -1.8850220 1.3988329
-1.6501601 -1.4845337 1.3990083
-2.3696014 -2.1559044 1.4012521
-1.6181139 -1.3994676 1.4012572
-2.2600711 -2.1121684 1.4017138
-1.9968805 -1.9447758 1.4021738
-1.7398949 -1.6561038 1.4024235
-1.6258902 -1.4261768 1.4035454
-2.2006306 -2.0823776 1.4039622
-1.6706544 -1.5350412 1.4041972
-1.6939321 -1.5809340 1.4051164
-1.8183136 -1.7650425 1.4059930
-1.9117923 -1.8676993 1.4069123
-1.7240005 -1.6342820 1.4078360
-1.8597842 -1.8133338 1.4079441
-2.4140525 -2.1655980 1.4079791
-2.0703621 -2.0000676 1.4089420
-2.3238245 -2.1368666 1.4092186
-1.9754697 -1.9260471 1.4100308
-2.1810342 -2.0692473 1.4117446
-2.0986567 -2.0190576 1.4118538
-1.7921138 -1.7345322 1.4124240
-2.0323989 -1.9720150 1.4126697
-2.2851022 -2.1187119 1.4129573
-1.7690357 -1.7039418 1.4132368
-1.6369327 -1.4682733 1.4135818
-2.2249403 -2.0914848 1.4140484
-1.7055970 -1.6081123 1.4152034
-1.5920904 -1.3305496 1.4153942
-1.6769353 -1.5570498 1.4157155
-2.1330141 -2.0399566 1.4160366
-1.6496686 -1.5031088 1.4193551
-1.7465091 -1.6741389 1.4201558
-1.8822997 -1.8384425 1.4207023
-1.9396474 -1.8937761 1.4207271
-2.3493331 -2.1393727 1.4208604
-1.8337124 -1.7866111 1.4208894
-2.3896549 -2.1520311 1.4210476
-2.0113726 -1.9544092 1.4222627
-1.6058394 -1.3961226 1.4225277
-2.2472753 -2.0989514 1.4233460
-2.0530790 -1.9850885 1.4242019
-2.1623052 -2.0549891 1.4242432
-1.6196392 -1.4393134 1.4243840
-1.9577273 -1.9097899 1.4251270
-1.9905746 -1.9373605 1.4269437
-1.9224284 -1.8777108 1.4271576
-2.3050208 -2.1209139 1.4275728
-1.6566782 -1.5274372 1.4284206
-1.8042324 -1.7532795 1.4284348
-2.0856505 -2.0062506 1.4291088
-2.1167049 -2.0263266 1.4299811
-1.9027745 -1.8590888 1.4300670
-1.7260344 -1.6486313 1.4307348
-2.1992305 -2.0726904 1.4313761
-1.6820894 -1.5775154 1.4316698
-1.6355171 -1.4859219 1.4321904
-1.8576770 -1.8140186 1.4337596
-2.4190637 -2.1544013 1.4339509
-2.2754261 -2.1072041 1.4342039
-1.7787675 -1.7226835 1.4345617
-1.7572180 -1.6948950 1.4350311
-1.6238662 -1.4628196 1.4354368
-1.7087141 -1.6244740 1.4360602
-1.5904882 -1.3717282 1.4368498
-2.0299870 -1.9665048 1.4368841
-1.6945172 -1.6023950 1.4379913
-2.2228898 -2.0818511 1.4381927
-1.8195906 -1.7729422 1.4392963
-2.3645147 -2.1364559 1.4402930
-1.6668759 -1.5569091 1.4414333
-2.1458133 -2.0403908 1.4421356
-2.0693700 -1.9928516 1.4423621
-1.6422981 -1.5091555 1.4425943
-2.1813090 -2.0598703 1.4426676
-1.8735340 -1.8307786 1.4428288
-1.6068039 -1.4296520 1.4431697
-2.3329632 -2.1234168 1.4436809
-1.9730034 -1.9208391 1.4452231
-1.7367511 -1.6698640 1.4452515
-1.9350777 -1.8889459 1.4453306
-1.8375021 -1.7938154 1.4467735
-2.0128059 -1.9519627 1.4478834
-2.2456738 -2.0885114 1.4486666
-2.0500239 -1.9782157 1.4500581
-1.7909446 -1.7417217 1.4502252
-2.1074517 -2.0157513 1.4503958
-1.9127001 -1.8687638 1.4506241
-2.2947762 -2.1076520 1.4508402
-1.9931454 -1.9364059 1.4530943
-1.5886751 -1.3937159 1.4533835
-1.7148081 -1.6415834 1.4533887
-1.6527921 -1.5406625 1.4537093
-1.8937084 -1.8510281 1.4538382
-1.6267557 -1.4892824 1.4546809
-1.7657090 -1.7112275 1.4548246
-2.2015590 -2.0659917 1.4548277
-1.6809933 -1.5907012 1.4559399
-2.2703809 -2.0956183 1.4564508
-1.9563831 -1.9064169 1.4569901
-1.8543485 -1.8121669 1.4579519
-1.6974366 -1.6177211 1.4582997
-1.5659229 -1.3279956 1.4584316
-1.6151136 -1.4666340 1.4584724
-2.1296154 -2.0262778 1.4590711
-2.0886461 -2.0013964 1.4597124
-2.1628053 -2.0444448 1.4603521
-1.5934656 -1.4181786 1.4606737
-1.7463797 -1.6895973 1.4629487
-1.8116918 -1.7674894 1.4631363
-2.0339734 -1.9642030 1.4637802
-2.2240087 -2.0727728 1.4643946
-1.6634614 -1.5655469 1.4648995
-1.7250123 -1.6608149 1.4656079
-2.3281393 -2.1117626 1.4660396
-1.6373597 -1.5202435 1.4673077
-1.8285518 -1.7855899 1.4678395
-1.8705422 -1.8289123 1.4682199
-1.6002106 -1.4424328 1.4684768
-1.9285051 -1.8818476 1.4690634
-2.0694046 -1.9868537 1.4692624
-1.7762670 -1.7279826 1.4704451
-1.9795491 -1.9232268 1.4711103
-2.1858789 -2.0522760 1.4722617
-2.0105565 -1.9463018 1.4723448
-2.1146773 -2.0135444 1.4754423
-1.7965546 -1.7525984 1.4761400
-2.2455066 -2.0770136 1.4762088
-2.2835811 -2.0920764 1.4766706
-1.9070785 -1.8626243 1.4769426
-2.1498319 -2.0319642 1.4774315
-1.7046393 -1.6366270 1.4778487
-1.6717200 -1.5876900 1.4782397
-1.7588385 -1.7084726 1.4786606
-1.6219976 -1.5004679 1.4792588
-1.9502890 -1.8991727 1.4800535
-2.3526639 -2.1120610 1.4802978
-1.8892807 -1.8463301 1.4810310
-1.6095803 -1.4769593 1.4816061
-2.2100551 -2.0599525 1.4818912
-1.8467870 -1.8059701 1.4822783
-1.6871569 -1.6133674 1.4823605
-1.6416643 -1.5393655 1.4824037
-2.0539951 -1.9734471 1.4833110
-1.7331032 -1.6777992 1.4849512
-2.0952620 -1.9986044 1.4862849
-1.8152630 -1.7741038 1.4867074
-1.5858787 -1.4289622 1.4868665
-1.6528675 -1.5619189 1.4870337
-2.0277804 -1.9551933 1.4876474
-2.3124244 -2.0963663 1.4883391
-1.5971704 -1.4571225 1.4892115
-2.1728380 -2.0398177 1.4894485
-1.9971131 -1.9330478 1.4910523
-1.5731687 -1.4046060 1.4915821
-1.7136426 -1.6546554 1.4930811
-1.8660081 -1.8248578 1.4936351
-1.9260080 -1.8780646 1.4940813
-1.6267010 -1.5208896 1.4941823
-1.9689872 -1.9118984 1.4944715
-1.7694547 -1.7246095 1.4948698
-2.0766485 -1.9848688 1.4954891
-1.5369268 -1.3024036 1.4955574
-2.1334278 -2.0176578 1.4956343
-1.8311059 -1.7908462 1.4985772
-2.2502195 -2.0695841 1.4989383
-1.7879947 -1.7458463 1.5000966
-1.7451242 -1.6971549 1.5004837
-2.3418686 -2.0985974 1.5011858
-2.1555708 -2.0268070 1.5016671
-1.6738652 -1.6028205 1.5019070
-1.6612025 -1.5818093 1.5022333
-1.6936555 -1.6303208 1.5024701
-1.9019672 -1.8567834 1.5028420
-2.1999703 -2.0473235 1.5031284
-2.1126739 -2.0040439 1.5034615
-1.9447660 -1.8921652 1.5043007
-1.6382051 -1.5482469 1.5056578
-2.3910667 -2.1074121 1.5064650
-1.5580792 -1.3857756 1.5065817
-1.8510625 -1.8106326 1.5075623
-2.0460982 -1.9627202 1.5075866
-2.0171286 -1.9438237 1.5081365
-1.7276986 -1.6775086 1.5088046
-1.8059810 -1.7661901 1.5092416
-1.5757215 -1.4302414 1.5099486
-2.0940217 -1.9907857 1.5116524
-1.8790706 -1.8362062 1.5129735
-1.6012114 -1.4855687 1.5130200
-1.5879947 -1.4602709 1.5131729
-1.6128612 -1.5079479 1.5133466
-1.9898749 -1.9239638 1.5137734
-2.1775940 -2.0323519 1.5158656
-1.9191396 -1.8701959 1.5168016
-1.7621509 -1.7196581 1.5180157
-1.9667238 -1.9066443 1.5181325
-2.1424521 -2.0147705 1.5181887
-2.0731487 -1.9761733 1.5204067
-2.3646042 -2.0939320 1.5204305
-1.7096528 -1.6573176 1.5207034
-1.8222623 -1.7835407 1.5217786
-2.2269805 -2.0506893 1.5219550
-1.7794385 -1.7392999 1.5224102
-1.6490654 -1.5743069 1.5228122
-1.6790143 -1.6177674 1.5230520
-1.6214474 -1.5317603 1.5249112
-1.8964649 -1.8506094 1.5261148
-1.5368926 -1.3546778 1.5267413
-2.0329658 -1.9498211 1.5267593
-1.6623298 -1.5948406 1.5268332
-1.7394830 -1.6955249 1.5270293
-2.2025172 -2.0388739 1.5276601
-1.8641738 -1.8225117 1.5277725
-1.9378347 -1.8836025 1.5277843
-2.0073745 -1.9329876 1.5287369
-2.2626817 -2.0607731 1.5293613
-2.1112003 -1.9946680 1.5301655
-1.8418686 -1.8022950 1.5302335
-1.6917800 -1.6378391 1.5319012
-1.5885906 -1.4767256 1.5320144
-1.5700558 -1.4415909 1.5321338
-2.0564665 -1.9628141 1.5337727
-1.6350579 -1.5571295 1.5344217
-1.6000097 -1.4993141 1.5350634
-1.5538637 -1.4081154 1.5365959
-1.8082150 -1.7701979 1.5370645
-2.3010753 -2.0691491 1.5371004
-1.7221302 -1.6770682 1.5371033
-1.5117444 -1.2951943 1.5372082
-1.9836582 -1.9148507 1.5374422
-2.1636120 -2.0176022 1.5386361
-2.0894975 -1.9799360 1.5391194
-1.9562638 -1.8952246 1.5403642
-2.1352231 -2.0028118 1.5421042
-1.7660126 -1.7269540 1.5422713
-1.9163083 -1.8648661 1.5431992
-1.5364618 -1.3754140 1.5438281
-1.8825183 -1.8375547 1.5440925
-2.2431582 -2.0464639 1.5451616
-1.7873205 -1.7492668 1.5453298
-1.7043054 -1.6576703 1.5453391
-1.8273516 -1.7887348 1.5461849
-1.6476440 -1.5817688 1.5464373
-1.7485159 -1.7087054 1.5465285
-1.6106127 -1.5251187 1.5483311
-2.3257857 -2.0695670 1.5483736
-1.6666761 -1.6095771 1.5498624
-2.1884302 -2.0237191 1.5503936
-2.0291122 -1.9414568 1.5512006
-1.8559245 -1.8142877 1.5513301
-1.9356991 -1.8787163 1.5516565
-1.5725666 -1.4608488 1.5519486
-1.5584777 -1.4334746 1.5529857
-2.1160312 -1.9889243 1.5543012
-1.8995002 -1.8502864 1.5558534
-2.0066763 -1.9262723 1.5560565
-1.6224558 -1.5486653 1.5561063
-1.7323721 -1.6919519 1.5573984
-1.6795038 -1.6292239 1.5577525
-2.0693195 -1.9629286 1.5578917
-2.1534912 -2.0053422 1.5582852
-1.9716211 -1.9025560 1.5585574
-1.5225682 -1.3611879 1.5599060
-1.8033734 -1.7660311 1.5614072
-1.7153035 -1.6735547 1.5615286
-1.5929443 -1.5064127 1.5644110
-2.0943721 -1.9742682 1.5660580
-1.7675577 -1.7306421 1.5663560
-1.6518324 -1.5950812 1.5665860
-1.6330502 -1.5694067 1.5667487
-1.8727537 -1.8276963 1.5672067
-1.5780409 -1.4816480 1.5677718
-2.2232515 -2.0280140 1.5690429
-1.9171036 -1.8620457 1.5691721
-1.8414752 -1.8009318 1.5695104
-2.0502109 -1.9489809 1.5700310
-1.9522749 -1.8869395 1.5707734
-1.6910024 -1.6470442 1.5720445
-1.5587103 -1.4498900 1.5721726
-1.6034883 -1.5273314 1.5721743
-1.5431236 -1.4207662 1.5725729
-2.1990599 -2.0180767 1.5727426
-1.7460509 -1.7086995 1.5730826
-2.2534506 -2.0366672 1.5731811
-1.7842999 -1.7476998 1.5734467
-2.1311607 -1.9890690 1.5741608
-1.9937405 -1.9136560 1.5748537
-1.8223557 -1.7836442 1.5753228
-1.6641668 -1.6146852 1.5761166
-2.0176341 -1.9279353 1.5776880
-2.1695132 -2.0037665 1.5788342
-1.8925364 -1.8417749 1.5793227
-1.5086576 -1.3492707 1.5794743
-1.5306913 -1.4005745 1.5805489
-1.7246120 -1.6870011 1.5806678
-1.8582294 -1.8141283 1.5816331
-1.6137328 -1.5476555 1.5834076
-1.5190333 -1.3786857 1.5839132
-1.4956916 -1.3232676 1.5841347
-1.9359228 -1.8729417 1.5844705
-2.0777803 -1.9589246 1.5853303
-1.7069960 -1.6683302 1.5854053
-1.8041047 -1.7668103 1.5856785
-1.9727986 -1.8974508 1.5857644
-2.1124567 -1.9760421 1.5859003
-1.5815273 -1.4996788 1.5868337
-1.5630359 -1.4694449 1.5879697
-1.6373144 -1.5827249 1.5883175
-1.6756328 -1.6321502 1.5893127
-1.5435871 -1.4369327 1.5917173
-1.7689255 -1.7330796 1.5918573
-2.0460221 -1.9398480 1.5928867
-1.9117918 -1.8542545 1.5932623
-1.8358094 -1.7943872 1.5935734
-2.2317707 -2.0194038 1.5939886
-1.5921817 -1.5209260 1.5971274
-2.1418010 -1.9849942 1.5974273
-1.7378288 -1.7027069 1.5974462
-1.8781097 -1.8284309 1.5976937
-1.7888849 -1.7524493 1.5982140
-1.9931958 -1.9073786 1.5987462
-1.9562187 -1.8835262 1.5999362
-1.6909115 -1.6518409 1.6002171
-2.1868612 -2.0016029 1.6003358
-1.4970642 -1.3472552 1.6017994
-2.0238860 -1.9242596 1.6024560
-1.6190818 -1.5628529 1.6027894
-1.6591643 -1.6156273 1.6028836
-1.4816175 -1.3109911 1.6031007
-2.0966524 -1.9621144 1.6035925
-1.8170310 -1.7777944 1.6040053
-1.7214355 -1.6862527 1.6053247
-1.8526049 -1.8074061 1.6053543
-2.1681272 -1.9920117 1.6058356
-1.4713893 -1.2868254 1.6063598
-1.7541749 -1.7193102 1.6078169
-1.6027851 -1.5414350 1.6079502
-1.5148895 -1.3912477 1.6085507
-1.8972602 -1.8412635 1.6088635
-2.0736192 -1.9489298 1.6088911
-1.5657810 -1.4855734 1.6092781
-1.5498796 -1.4600656 1.6094878
-1.9356419 -1.8676192 1.6106587
-1.7048829 -1.6690882 1.6110298
-1.6399208 -1.5930590 1.6117898
-1.5322185 -1.4307208 1.6123593
-1.6753029 -1.6368691 1.6163348
-1.5767705 -1.5069674 1.6163440
-1.7741334 -1.7387529 1.6169042
-1.9788509 -1.8940550 1.6170412
-1.4585472 -1.2670470 1.6171305
-2.0472754 -1.9322464 1.6188355
-2.1884645 -1.9937195 1.6191655
-1.8383887 -1.7945389 1.6204686
-2.1154129 -1.9640834 1.6206757
-2.0101192 -1.9112358 1.6206926
-1.7981081 -1.7603802 1.6208385
-1.8757073 -1.8232530 1.6219898
-1.4998287 -1.3736812 1.6223701
-1.9153955 -1.8515851 1.6224193
-1.7339564 -1.7001600 1.6225505
-1.5190998 -1.4130804 1.6238028
-1.4870083 -1.3478735 1.6242301
-1.9594748 -1.8798345 1.6255740
-1.6217935 -1.5737302 1.6257821
-1.6515765 -1.6106744 1.6262000
-1.8160836 -1.7756258 1.6287999
-2.0915497 -1.9503293 1.6290907
-1.4736408 -1.3228713 1.6298785
-1.5523945 -1.4750662 1.6301729
-1.5345109 -1.4463957 1.6311048
-2.2145269 -1.9956788 1.6312149
-1.7589037 -1.7245288 1.6321434
-1.6012701 -1.5489623 1.6329785
-1.6965549 -1.6626156 1.6332037
-1.8977928 -1.8371208 1.6335804
-2.0320282 -1.9193483 1.6341779
-2.0677529 -1.9370385 1.6349952
-1.5822982 -1.5234381 1.6359296
-1.4600243 -1.2968370 1.6362659
-1.7182004 -1.6854444 1.6371153
-1.9396251 -1.8644776 1.6372853
-1.5628902 -1.4957691 1.6381272
-1.9967327 -1.8985660 1.6384781
-2.1750148 -1.9802532 1.6386227
-1.6678205 -1.6322009 1.6392421
-1.6338616 -1.5920291 1.6394284
-1.8614587 -1.8097460 1.6402817
-1.7836818 -1.7469491 1.6404493
-1.5036582 -1.3971165 1.6408674
-1.4486559 -1.2752354 1.6412416
-1.8415664 -1.7942647 1.6445208
-2.1225309 -1.9571368 1.6446791
-1.9773952 -1.8850815 1.6470936
-1.4366654 -1.2509915 1.6481196
-2.1986603 -1.9828486 1.6481205
-1.9198668 -1.8490613 1.6482039
-1.7354849 -1.7031633 1.6487995
-1.6153310 -1.5723060 1.6497156
-1.5123996 -1.4191378 1.6498366
-1.6500021 -1.6136653 1.6509832
-1.8007042 -1.7605972 1.6518262
-2.0513665 -1.9228185 1.6522610
-1.8841435 -1.8238344 1.6525110
-1.6813034 -1.6485255 1.6526619
-1.5239155 -1.4413789 1.6529933
-1.5403133 -1.4679724 1.6532149
-2.0985934 -1.9436798 1.6535557
-2.0206001 -1.9069144 1.6536447
-1.4590165 -1.3166026 1.6547630
-2.1593920 -1.9662762 1.6552493
-1.8226998 -1.7782933 1.6560591
-1.7684630 -1.7327037 1.6560743
-1.7036653 -1.6720242 1.6568636
-1.9581715 -1.8711447 1.6570093
-1.5679214 -1.5113057 1.6588263
-1.5864022 -1.5368649 1.6588633
-2.0753383 -1.9305766 1.6618257
-1.4879705 -1.3826558 1.6620911
-1.6348303 -1.5985705 1.6641451
-1.9045035 -1.8351509 1.6649419
-1.8624929 -1.8065532 1.6653454
-2.0026659 -1.8935038 1.6659611
-1.7496622 -1.7159254 1.6664580
-1.9385934 -1.8565801 1.6669371
-1.6651244 -1.6323119 1.6671430
-1.6001227 -1.5573992 1.6683102
-1.7195719 -1.6880309 1.6693604
-2.1409134 -1.9533501 1.6706900
-1.4658794 -1.3451053 1.6714946
-1.4977485 -1.4067976 1.6716429
-2.1159028 -1.9430987 1.6718835
-1.9805486 -1.8792770 1.6731162
-1.8381498 -1.7876398 1.6741864
-1.6162098 -1.5786516 1.6746293
-1.5244940 -1.4531882 1.6749450
-1.7906334 -1.7504594 1.6751559
-1.6884364 -1.6576821 1.6764957
-1.6486073 -1.6158668 1.6778314
-1.8883236 -1.8218768 1.6779346
-1.5112160 -1.4324857 1.6779837
-2.0422682 -1.9090540 1.6782981
-1.8118493 -1.7667401 1.6793319
-2.1652171 -1.9564632 1.6796575
-1.5548880 -1.5016207 1.6816862
-1.9613069 -1.8661086 1.6819067
-1.5732871 -1.5263815 1.6825452
-2.0654439 -1.9178659 1.6829179
-1.7679062 -1.7309414 1.6830727
-1.4752396 -1.3742935 1.6850923
-1.7390908 -1.7056958 1.6860876
-1.7041925 -1.6737062 1.6875745
-1.8591809 -1.7997912 1.6884139
-1.4233354 -1.2701513 1.6892339
-2.0208046 -1.8948004 1.6895976
-1.4132317 -1.2444339 1.6898081
-1.6321296 -1.5995782 1.6899174
-1.6727718 -1.6425804 1.6899937
-1.9275874 -1.8440551 1.6900682
-1.9977227 -1.8829753 1.6903302
-2.0964651 -1.9274064 1.6911840
-1.4838027 -1.3966993 1.6924140
-2.1326768 -1.9401574 1.6931197
-1.5979885 -1.5606281 1.6931287
-1.5303495 -1.4702924 1.6950609
-1.9077640 -1.8303744 1.6954126
-1.8308928 -1.7786283 1.6967589
-2.1967187 -1.9564387 1.6984473
-1.6145467 -1.5813753 1.6997736
-1.4001379 -1.2252071 1.7000534
-1.7926774 -1.7492948 1.7008049
-1.9501825 -1.8543094 1.7008758
-1.7191963 -1.6875155 1.7009231
-1.4998883 -1.4264605 1.7010942
-1.6565587 -1.6266126 1.7014948
-1.8844547 -1.8140482 1.7021166
-1.5807865 -1.5413216 1.7024930
-1.9739875 -1.8666393 1.7026473
-2.1568810 -1.9422424 1.7030510
-1.6894737 -1.6597295 1.7036492
-1.7569963 -1.7202412 1.7045037
-2.0592954 -1.9055895 1.7049273
-1.5407032 -1.4903931 1.7064559
-1.8128688 -1.7638594 1.7072372
-1.5590377 -1.5147583 1.7076765
-1.4703470 -1.3813257 1.7077917
-1.5128359 -1.4522700 1.7104711
-1.8558778 -1.7929809 1.7122741
-2.0382650 -1.8942814 1.7129263
-1.7382159 -1.7039017 1.7133786
-1.9957259 -1.8742497 1.7142160
-1.9334227 -1.8405908 1.7148297
-1.7052488 -1.6745570 1.7160205
-1.6291333 -1.5998402 1.7163431
-1.6737870 -1.6448436 1.7170485
-1.6006922 -1.5679580 1.7173454
-1.4401701 -1.3327317 1.7179662
-1.4789554 -1.4024883 1.7191034
-1.7778715 -1.7355618 1.7195093
-1.9113582 -1.8263008 1.7201582
-1.4558746 -1.3634690 1.7202548
-1.8338954 -1.7761942 1.7208417
-2.0178842 -1.8820186 1.7215966
-1.5231361 -1.4718784 1.7236874
-2.0741566 -1.9043118 1.7244257
-1.6469317 -1.6186633 1.7254883
-1.7980538 -1.7500228 1.7259998
-1.8879003 -1.8105427 1.7261164
-1.3777089 -1.1976898 1.7275168
-1.9762270 -1.8595996 1.7275913
-1.5735262 -1.5383497 1.7281545
-1.3819181 -1.2118361 1.7285967
-1.6894366 -1.6599205 1.7290430
-1.7235160 -1.6902933 1.7291657
-1.7592156 -1.7197351 1.7293591
-1.5363645 -1.4935669 1.7323833
-1.8175303 -1.7623980 1.7343830
-1.8682626 -1.7960943 1.7353919
-1.9489920 -1.8428588 1.7359628
-1.5887720 -1.5578746 1.7364862
-1.5089369 -1.4548679 1.7366963
-1.6131163 -1.5842866 1.7372841
-1.9996802 -1.8670570 1.7376507
-1.6633180 -1.6354301 1.7386379
-1.4883318 -1.4261405 1.7389259
-1.5543553 -1.5174281 1.7398075
-2.1274484 -1.9149937 1.7404178
-1.4617358 -1.3854659 1.7404622
-1.6313664 -1.6039506 1.7412918
-2.0319953 -1.8802913 1.7420799
-1.8472108 -1.7810168 1.7424234
-1.9289222 -1.8299612 1.7427691
-2.0657877 -1.8926064 1.7442490
-1.7830778 -1.7359642 1.7450485
-1.7085352 -1.6766223 1.7452277
-1.7405523 -1.7032027 1.7454055
-1.3789907 -1.2279186 1.7467499
-1.8996880 -1.8118982 1.7476211
-1.4291429 -1.3345797 1.7481742
-1.4152476 -1.3079399 1.7482805
-1.4027845 -1.2843433 1.7494144
-1.3680619 -1.2058686 1.7498691
-2.1052107 -1.9040925 1.7502772
-1.5176070 -1.4722715 1.7512158
-1.6479567 -1.6204779 1.7515596
-1.4425324 -1.3600803 1.7518258
-1.6837646 -1.6542675 1.7521366
-1.3908470 -1.2618294 1.7521424
-1.5715606 -1.5401094 1.7528339
-1.8029896 -1.7489456 1.7540066
-1.9742267 -1.8496862 1.7541910
-1.7616968 -1.7187928 1.7542135
-1.8307410 -1.7670007 1.7554903
-1.4672452 -1.4028804 1.7576835
-1.8782446 -1.7969002 1.7582375
-1.5954383 -1.5673692 1.7582777
-1.9466013 -1.8342778 1.7589846
-2.0147259 -1.8648941 1.7610005
-1.5394542 -1.5050325 1.7616991
-1.4864006 -1.4342977 1.7635966
-1.7257937 -1.6895487 1.7640296
-1.6681758 -1.6400832 1.7648402
-1.6272266 -1.6009828 1.7655066
-1.9239864 -1.8199739 1.7665048
-1.4509550 -1.3828551 1.7672559
-1.7452249 -1.7041508 1.7699236
-1.6971886 -1.6652317 1.7700451
-1.8538285 -1.7786694 1.7701733
-1.4999151 -1.4550020 1.7702331
-1.9936311 -1.8522766 1.7702684
-1.8980304 -1.8045083 1.7709618
-1.3541900 -1.1969552 1.7712393
-1.4227643 -1.3380399 1.7716953
-1.6096419 -1.5833290 1.7722093
-1.7795650 -1.7290857 1.7722103
-1.8195404 -1.7559358 1.7740401
-1.9657575 -1.8381841 1.7740837
-2.0681399 -1.8797084 1.7743509
-1.4077593 -1.3148867 1.7764825
-1.5620410 -1.5323350 1.7767025
-1.5809828 -1.5541206 1.7770133
-1.3602895 -1.2198967 1.7776790
-1.6424719 -1.6157933 1.7778351
-1.3768994 -1.2572751 1.7779840
-1.5128536 -1.4742226 1.7812079
-1.4669431 -1.4133507 1.7824022
-1.7986698 -1.7402818 1.7835742
-1.8776913 -1.7890674 1.7852988
-2.0373624 -1.8639614 1.7853519
-1.4317880 -1.3620532 1.7858827
-1.7141807 -1.6780511 1.7865818
-1.9395991 -1.8210626 1.7867077
-1.9159722 -1.8091494 1.7868646
-1.6775553 -1.6475802 1.7876319
-1.8402623 -1.7657929 1.7884060
-1.4818642 -1.4369117 1.7887890
-1.5305116 -1.4994229 1.7890185
-1.5970876 -1.5717761 1.7899851
-1.7654108 -1.7160933 1.7904284
-2.0889728 -1.8782383 1.7916569
-1.3829983 -1.2795489 1.7921506
-1.9949467 -1.8432868 1.7930638
-1.7395541 -1.6965535 1.7940092
-1.4423673 -1.3822411 1.7943086
-1.6957009 -1.6621796 1.7958501
-1.4152523 -1.3402108 1.7971889
-1.6295201 -1.6040517 1.7986490
-1.6513726 -1.6237226 1.7991209
-1.4954088 -1.4579603 1.7992323
-1.3989035 -1.3147317 1.8003103
-1.8188105 -1.7497975 1.8005071
-1.9638656 -1.8271573 1.8013217
-1.7843838 -1.7267899 1.8018905
-1.5654655 -1.5396128 1.8025556
-1.8661405 -1.7768517 1.8044071
-1.4526290 -1.4020731 1.8045933
-1.5829067 -1.5580388 1.8052504
-1.8981583 -1.7942390 1.8053429
-1.6108617 -1.5858113 1.8059156
-2.0265306 -1.8506155 1.8062927
-1.3586055 -1.2439308 1.8064840
-1.6707563 -1.6400992 1.8100810
-1.5135480 -1.4823827 1.8103355
-1.7211024 -1.6804379 1.8104500
-1.9250969 -1.8054163 1.8114862
-1.4218379 -1.3599308 1.8120557
-1.4669075 -1.4247412 1.8132837
-1.9868495 -1.8323117 1.8136308
-1.8431205 -1.7610065 1.8139442
-1.7615910 -1.7087235 1.8140401
-1.5288252 -1.5018472 1.8143994
-1.7404507 -1.6935574 1.8185190
-1.4387627 -1.3868357 1.8186367
-1.4836863 -1.4476964 1.8190149
-1.6887164 -1.6541677 1.8190156
-1.3646124 -1.2662555 1.8206125
-1.7994701 -1.7325003 1.8211086
-1.3762790 -1.2880770 1.8214459
-1.5950953 -1.5712577 1.8219313
-1.6305989 -1.6041902 1.8231991
-1.5550367 -1.5309506 1.8246910
-1.5724442 -1.5485671 1.8253407
-1.8839006 -1.7803824 1.8255475
-1.3901316 -1.3162511 1.8268125
-1.8623574 -1.7681418 1.8275891
-1.8219767 -1.7450139 1.8275984
-1.9449510 -1.8082082 1.8282213
-2.0177230 -1.8380112 1.8283269
-2.0546096 -1.8492065 1.8286136
-1.7076916 -1.6677518 1.8287998
-1.6603007 -1.6300674 1.8304805
-1.9111866 -1.7921772 1.8305354
-1.4965515 -1.4661238 1.8309552
-1.4495579 -1.4080829 1.8344326
-1.9726954 -1.8172110 1.8345612
-1.7820734 -1.7184980 1.8355726
-1.5192492 -1.4930858 1.8363588
-1.7283367 -1.6813700 1.8364848
-1.5378434 -1.5127413 1.8373713
-1.7610708 -1.7036101 1.8379750
-1.6104218 -1.5856817 1.8388166
-1.3519331 -1.2592360 1.8410555
-1.3980100 -1.3356517 1.8413961
-1.6820305 -1.6463252 1.8415920
-1.8454104 -1.7546985 1.8416674
-1.6446753 -1.6158657 1.8430725
-2.0381518 -1.8375817 1.8431036
-1.5839113 -1.5607529 1.8432837
-1.4298726 -1.3843110 1.8434098
-1.3297646 -1.2159907 1.8441840
-1.8067144 -1.7311425 1.8446942
-1.3693366 -1.2921857 1.8448745
-1.4631446 -1.4283735 1.8455666
-1.9303485 -1.7946986 1.8477901
-1.5622288 -1.5395017 1.8478720
-1.8760436 -1.7692518 1.8483384
-1.8994455 -1.7800857 1.8495052
-1.4805208 -1.4511438 1.8514566
-1.7022556 -1.6601197 1.8528275
-1.6251544 -1.5983775 1.8533258
-1.5055803 -1.4801643 1.8538136
-1.7427830 -1.6880657 1.8552837
-1.8274838 -1.7404772 1.8564277
-1.4138418 -1.3662391 1.8565673
-1.6616371 -1.6283070 1.8571204
-1.4418524 -1.4046191 1.8578768
-1.5996925 -1.5752089 1.8584787
-1.7743613 -1.7079411 1.8585429
-1.5450375 -1.5226188 1.8592041
-1.3790180 -1.3156453 1.8621018
-1.7218934 -1.6724343 1.8627384
-1.8581074 -1.7548016 1.8633362
-1.3969771 -1.3457312 1.8639148
-1.5275153 -1.5045246 1.8648077
-1.3256291 -1.2256728 1.8656841
-1.9614700 -1.8000007 1.8659767
-1.6827061 -1.6433309 1.8668577
-1.3465261 -1.2645438 1.8669424
-1.7997469 -1.7211628 1.8674406
-1.5828879 -1.5588308 1.8679814
-1.9287813 -1.7849308 1.8702059
-1.8879814 -1.7671273 1.8702285
-1.6422899 -1.6113060 1.8706013
-1.4903736 -1.4657141 1.8706932
-1.4545536 -1.4241544 1.8715324
-1.3575043 -1.2866221 1.8720458
-1.5618317 -1.5395996 1.8731798
-1.4705514 -1.4433612 1.8755515
-1.5102136 -1.4878133 1.8774621
-1.7637454 -1.6966319 1.8775554
-1.7072674 -1.6596338 1.8776806
-1.4240114 -1.3874673 1.8782655
-1.7392076 -1.6807299 1.8796220
-1.8227945 -1.7308087 1.8796944
-1.6077623 -1.5810219 1.8807421
-1.6673172 -1.6299326 1.8826385
-1.6261783 -1.5967209 1.8832980
-1.9798428 -1.7990426 1.8836694
-1.8503905 -1.7441696 1.8837501
-1.5397781 -1.5183041 1.8851950
-1.7880386 -1.7094466 1.8861646
-1.3646193 -1.3056809 1.8872378
-1.3834465 -1.3347756 1.8875324
-1.3213754 -1.2343311 1.8881380
-1.3343660 -1.2588857 1.8902066
-1.6880953 -1.6434173 1.8907588
-1.8730224 -1.7522407 1.8917257
-1.5231557 -1.5022519 1.8925942
-1.5920398 -1.5671340 1.8929994
-1.4051707 -1.3667338 1.8938431
-1.6492443 -1.6140590 1.8947301
-1.4930169 -1.4714229 1.8955708
-1.4612900 -1.4370436 1.8979370
-1.5668861 -1.5441711 1.8980365
-1.8115028 -1.7187365 1.8994452
-1.7557427 -1.6862567 1.9000542
-1.9625964 -1.7849339 1.9017432
-1.4399190 -1.4117364 1.9017752
-1.8363592 -1.7303709 1.9036124
-1.6199779 -1.5902800 1.9065286
-1.7349778 -1.6716793 1.9068823
-1.3707104 -1.3241547 1.9075705
-1.6684941 -1.6264317 1.9077298
-1.5450523 -1.5239136 1.9087059
-1.5072076 -1.4871652 1.9103222
-1.2938246 -1.1994642 1.9104095
-1.7800889 -1.6984833 1.9106170
-1.3844633 -1.3442719 1.9117443
-1.4195147 -1.3898564 1.9120685
-1.7056365 -1.6515707 1.9125554
-1.8814287 -1.7470607 1.9151227
-1.6028421 -1.5748398 1.9166643
-1.3259925 -1.2598315 1.9169944
-1.8565299 -1.7348255 1.9183838
-1.5286621 -1.5082438 1.9188621
-1.3047582 -1.2251865 1.9191981
-1.5802551 -1.5544611 1.9194282
-1.8023959 -1.7074499 1.9205077
-1.4502750 -1.4278086 1.9209844
-1.4700547 -1.4492318 1.9212744
-1.9445610 -1.7698636 1.9213501
-1.3980423 -1.3660010 1.9216268
-1.6489480 -1.6097017 1.9217294
-1.8249975 -1.7184915 1.9233614
-1.7607044 -1.6823779 1.9266121
-1.5599754 -1.5367645 1.9274540
-1.4308923 -1.4061652 1.9276372
-1.9041403 -1.7513412 1.9293631
-1.3415102 -1.2897844 1.9299963
-1.7296533 -1.6622060 1.9305097
-1.4952850 -1.4762876 1.9311017
-1.6902452 -1.6359590 1.9317597
-1.3561258 -1.3134705 1.9320480
-1.2712160 -1.1732716 1.9337254
-1.6211579 -1.5871212 1.9355547
-1.4111053 -1.3851811 1.9368305
-1.8758856 -1.7363479 1.9372241
-1.5928638 -1.5640795 1.9379463
-1.7888251 -1.6944937 1.9385715
-1.8484296 -1.7238332 1.9389384
-1.5442645 -1.5226842 1.9396798
-1.3065975 -1.2409804 1.9409723
-1.9591746 -1.7657707 1.9412465
-1.2793977 -1.1940097 1.9413009
-1.4589082 -1.4392325 1.9421050
-1.6605678 -1.6139591 1.9430805
-1.5119731 -1.4923568 1.9431656
-1.3718003 -1.3371347 1.9435057
-1.7117652 -1.6476152 1.9457667
-1.9038298 -1.7437179 1.9461199
-1.3947425 -1.3680284 1.9476258
-1.6414095 -1.5994408 1.9478877
-1.5731697 -1.5468788 1.9493343
-1.4416896 -1.4216029 1.9513704
-1.8244731 -1.7079638 1.9514215
-1.4842487 -1.4663326 1.9518148
-1.9335465 -1.7515977 1.9525247
-1.2919703 -1.2251344 1.9531551
-1.7370825 -1.6611246 1.9536542
-1.7707243 -1.6799732 1.9536782
-1.4218820 -1.4004473 1.9537198
-1.6091995 -1.5752520 1.9545223
-1.3490247 -1.3112963 1.9568919
-1.6855407 -1.6280487 1.9579852
-1.8741614 -1.7263213 1.9607517
-1.8499402 -1.7157477 1.9625439
-1.7952411 -1.6896941 1.9633198
-1.5013292 -1.4829870 1.9633446
-1.4664972 -1.4487843 1.9641496
-1.3796198 -1.3527168 1.9642411
-1.5905165 -1.5588477 1.9644931
-1.3203738 -1.2726473 1.9645465
-1.2778660 -1.2072377 1.9649133
-1.5574259 -1.5330132 1.9655141
-1.6628201 -1.6107449 1.9676340
-1.8965920 -1.7307167 1.9698484
-1.7224414 -1.6478804 1.9700821
-1.2480481 -1.1601198 1.9712925
-1.2360183 -1.1355257 1.9717553
-1.9244802 -1.7400460 1.9719870
-1.4488395 -1.4315024 1.9731891
-1.4302100 -1.4118879 1.9736901
-1.5260785 -1.5044595 1.9740420
-1.4099773 -1.3898955 1.9740490
-1.3580751 -1.3279342 1.9747370
-1.7590862 -1.6667835 1.9751451
-1.6238667 -1.5822999 1.9753333
-1.7022464 -1.6341965 1.9758757
-1.8363481 -1.7024483 1.9791468
-1.6807302 -1.6192243 1.9816679
-1.3147540 -1.2728428 1.9817762
-1.4884311 -1.4705280 1.9829892
-1.6478438 -1.5971299 1.9836796
-1.6057010 -1.5676980 1.9837489
-1.8644856 -1.7124840 1.9844142
-1.7860983 -1.6770281 1.9860630
-1.5823871 -1.5501539 1.9860640
-1.5098139 -1.4899253 1.9871850
-1.5453877 -1.5204528 1.9877325
-1.4663977 -1.4493008 1.9906076
-1.3775214 -1.3556941 1.9907576
-1.8951168 -1.7203399 1.9918970
-1.3278620 -1.2930704 1.9924217
-1.7215359 -1.6407162 1.9933857
-1.2263094 -1.1353911 1.9945365
-1.8227007 -1.6902307 1.9952632
-1.7476089 -1.6541883 1.9957468
-1.3994524 -1.3811590 1.9963148
-1.4194568 -1.4024167 1.9967725
-1.2488546 -1.1764899 1.9972973
-1.5639583 -1.5343959 1.9973172
-1.6653548 -1.6051013 1.9987658
-1.6973173 -1.6242663 1.9995782
-1.6323226 -1.5831020 2.0002095
-1.7711538 -1.6646817 2.0012088
-1.2603193 -1.1986547 2.0020567
-1.3575755 -1.3344949 2.0030103
-1.2935117 -1.2506485 2.0045476
-1.9353917 -1.7265617 2.0049039
-1.5239214 -1.5009067 2.0049170
-1.4973370 -1.4779398 2.0076288
-1.2715699 -1.2209380 2.0111387
-1.4550619 -1.4397125 2.0112562
-1.5833427 -1.5467289 2.0114798
-1.8075202 -1.6775247 2.0115418
-1.6086414 -1.5648988 2.0116090
-1.8415992 -1.6917017 2.0117140
-1.4774094 -1.4595947 2.0117876
-1.3127508 -1.2801012 2.0119699
-1.3361081 -1.3103093 2.0129102
-1.5424972 -1.5152018 2.0150011
-1.3816458 -1.3641944 2.0152031
-1.6483410 -1.5895166 2.0187143
-1.7156866 -1.6291982 2.0192558
-1.7572522 -1.6516470 2.0195810
-1.4207143 -1.4056885 2.0215112
-1.4019411 -1.3865091 2.0215576
-1.6766642 -1.6064241 2.0219131
-1.2974258 -1.2641932 2.0260448
-1.2787823 -1.2388046 2.0264678
-1.4377362 -1.4230324 2.0267008
-1.5164242 -1.4927537 2.0281807
-1.2496828 -1.1965775 2.0285069
-1.7785344 -1.6568569 2.0300812
-1.6310589 -1.5755298 2.0316738
-1.4907162 -1.4711304 2.0322157
-1.8340189 -1.6793388 2.0338590
-1.5969112 -1.5521216 2.0350706
-1.2036656 -1.1217391 2.0351380
-1.4599513 -1.4438832 2.0362041
-1.2161483 -1.1442825 2.0363160
-1.3716319 -1.3561627 2.0367013
-1.5752170 -1.5365647 2.0378761
-1.2614104 -1.2191895 2.0398252
-1.5518388 -1.5188897 2.0412632
-1.7290199 -1.6293676 2.0414405
-1.7031421 -1.6151124 2.0418253
-1.3324608 -1.3119992 2.0423942
-1.4118181 -1.3980242 2.0428312
-1.6643585 -1.5932773 2.0433587
-1.3903231 -1.3766287 2.0440437
-1.2884913 -1.2592347 2.0485582
-1.3057528 -1.2804221 2.0501826
-1.4316856 -1.4182994 2.0505324
-1.7736886 -1.6467418 2.0521375
-1.5036992 -1.4798931 2.0525679
-1.3522967 -1.3368708 2.0525812
-1.6426906 -1.5769534 2.0547755
-1.2709212 -1.2378270 2.0556750
-1.6850438 -1.6014679 2.0565758
-1.4834092 -1.4626549 2.0598972
-1.3728658 -1.3597524 2.0609967
-1.5753267 -1.5319650 2.0623956
-1.5265647 -1.4960177 2.0629858
-1.4579388 -1.4407215 2.0639298
-1.3185277 -1.3009878 2.0657198
-1.7259854 -1.6193356 2.0658817
-1.2112721 -1.1529420 2.0661272
-1.4087234 -1.3954775 2.0667747
-1.6160433 -1.5573289 2.0685252
-1.2459867 -1.2079236 2.0694086
-1.5563785 -1.5173457 2.0702243
-1.8200267 -1.6576765 2.0711827
-1.6623779 -1.5841287 2.0719528
-1.2794662 -1.2544984 2.0722887
-1.3408091 -1.3264303 2.0725893
-1.7033895 -1.6051687 2.0740728
-1.3919451 -1.3794948 2.0745107
-1.4313229 -1.4171674 2.0755430
-1.2981193 -1.2783842 2.0765809
-1.1954356 -1.1349753 2.0777913
-1.5011192 -1.4754795 2.0783417
-1.7666614 -1.6334632 2.0786585
-1.5974056 -1.5426414 2.0802721
-1.3610831 -1.3494158 2.0826205
-1.6374863 -1.5666298 2.0834069
-1.4664228 -1.4463486 2.0860584
-1.5267623 -1.4933559 2.0880016
-1.5746834 -1.5260980 2.0884880
-1.6858329 -1.5915299 2.0885854
-1.7353610 -1.6148148 2.0890102
-1.4112868 -1.3980600 2.0909857
-1.4848939 -1.4610811 2.0916008
-1.3223483 -1.3091585 2.0920372
-1.2850896 -1.2661818 2.0938684
-1.8065389 -1.6420070 2.0940862
-1.6183543 -1.5521748 2.0945250
-1.3743258 -1.3637001 2.0992894
-1.3049154 -1.2906638 2.1008580
-1.7606969 -1.6214909 2.1014602
-1.5550072 -1.5094362 2.1019987
-1.5924195 -1.5334314 2.1046857
-1.3425813 -1.3316574 2.1052729
-1.6587231 -1.5710887 2.1063966
-1.5148538 -1.4801549 2.1090719
-1.2655504 -1.2464246 2.1096728
-1.4383471 -1.4207236 2.1101629
-1.6839795 -1.5829520 2.1113635
-1.4632954 -1.4416298 2.1113822
-1.7258400 -1.6020894 2.1135202
-1.2579064 -1.2375597 2.1139139
-1.4928063 -1.4638542 2.1144503
-1.4181935 -1.4035919 2.1145726
-1.5734990 -1.5191050 2.1158633
-1.6301874 -1.5526849 2.1171940
-1.7455615 -1.6086102 2.1173265
-1.5396508 -1.4962214 2.1175950
-1.8066213 -1.6312580 2.1178401
-1.1981123 -1.1576581 2.1185417
-1.2321068 -1.2053078 2.1202515
-1.3559910 -1.3469014 2.1209841
-1.1664856 -1.1100035 2.1214026
-1.3846998 -1.3730610 2.1214149
-1.6089784 -1.5391004 2.1215660
-1.1367159 -1.0607136 2.1235231
-1.2925481 -1.2815489 2.1242221
-1.3123434 -1.3015055 2.1244035
-1.1245503 -1.0381645 2.1249878
-1.1484745 -1.0824612 2.1257348
-1.7057618 -1.5880559 2.1265175
-1.1084005 -1.0083451 2.1276419
-1.7735862 -1.6146319 2.1288825
-1.1782949 -1.1330585 2.1294977
-1.2275268 -1.2028321 2.1315565
-1.5574838 -1.5048670 2.1317089
-1.4746076 -1.4471534 2.1327122
-1.5240399 -1.4834003 2.1332713
-1.7317431 -1.5957926 2.1333807
-1.4051748 -1.3911382 2.1343480
-1.4407799 -1.4205251 2.1373458
-1.5929132 -1.5251468 2.1387213
-1.6872391 -1.5732385 2.1409175
-1.3380893 -1.3297628 2.1413597
-1.6239874 -1.5419751 2.1418190
-1.7116545 -1.5842128 2.1427809
-1.1635707 -1.1172839 2.1444818
-1.5427911 -1.4921538 2.1466042
-1.1949020 -1.1641016 2.1466656
-1.3560008 -1.3463923 2.1466974
-1.3779585 -1.3664297 2.1473883
-1.3008974 -1.2920741 2.1478134
-1.3196063 -1.3109200 2.1479495
-1.4239320 -1.4057582 2.1511908
-1.2512588 -1.2376148 2.1520805
-1.2170986 -1.1957064 2.1524371
-1.1746234 -1.1384884 2.1545497
-1.4890519 -1.4543526 2.1547369
-1.7463293 -1.5924628 2.1552319
-1.5654404 -1.5043289 2.1566778
-1.3988573 -1.3845950 2.1569462
-1.4615128 -1.4338020 2.1575296
-1.5216798 -1.4759390 2.1587096
-1.2673667 -1.2571765 2.1599431
-1.6040119 -1.5246104 2.1609699
-1.2354900 -1.2208951 2.1619388
-1.4420743 -1.4187683 2.1624624
-1.6819198 -1.5635711 2.1631066
-1.6595723 -1.5517967 2.1638909
-1.3430419 -1.3344718 2.1658733
-1.7264703 -1.5804373 2.1662820
-1.1847044 -1.1580322 2.1693617
-1.1191253 -1.0572103 2.1696689
-1.6328358 -1.5372670 2.1704519
-1.3077698 -1.3010884 2.1719012
-1.2060424 -1.1868190 2.1723191
-1.3260172 -1.3185525 2.1734562
-1.5494422 -1.4898125 2.1735889
-1.2826938 -1.2746721 2.1741816
-1.4205739 -1.4009090 2.1765567
-1.4835794 -1.4466407 2.1784157
-1.6134532 -1.5228016 2.1842927
-1.3998367 -1.3831952 2.1848114
-1.6748369 -1.5513895 2.1855505
-1.5220438 -1.4696466 2.1871130
-1.3751191 -1.3623375 2.1875052
-1.2267177 -1.2146853 2.1890790
-1.4653942 -1.4314827 2.1900513
-1.2956636 -1.2896066 2.1903078
-1.7303550 -1.5716626 2.1905901
-1.3425050 -1.3341022 2.1918961
-1.4376351 -1.4111752 2.1923429
-1.1522669 -1.1203880 2.1933095
-1.6371089 -1.5302336 2.1945402
-1.1249865 -1.0798326 2.1950279
-1.2093386 -1.1965727 2.1960231
-1.3132643 -1.3064478 2.1972635
-1.5685865 -1.4944092 2.1978084
-1.5445664 -1.4803538 2.1983860
-1.7017434 -1.5567624 2.1989469
-1.2772024 -1.2717107 2.2004682
-1.1782850 -1.1594142 2.2006014
-1.5058318 -1.4563071 2.2033680
-1.6676532 -1.5397775 2.2060202
-1.3621594 -1.3504131 2.2066852
-1.4166206 -1.3927887 2.2067995
-1.1926197 -1.1782215 2.2071949
-1.3962422 -1.3777336 2.2123950
-1.5288871 -1.4664578 2.2150268
-1.6290759 -1.5191107 2.2150514
-1.4777787 -1.4347984 2.2151482
-1.3006522 -1.2950625 2.2156409
-1.2301460 -1.2228091 2.2169762
-1.1452538 -1.1203472 2.2176357
-1.2119767 -1.2032095 2.2192222
-1.5512043 -1.4774640 2.2223163
-1.6054920 -1.5055304 2.2235163
-1.0920139 -1.0434776 2.2250770
-1.6508743 -1.5246987 2.2273414
-1.1588492 -1.1401267 2.2278334
-1.2827406 -1.2775904 2.2280781
-1.3549325 -1.3421899 2.2313636
-1.4624547 -1.4212960 2.2315429
-1.1877282 -1.1781278 2.2333371
-1.3866992 -1.3673009 2.2351962
-1.6930117 -1.5363890 2.2372284
-1.3107770 -1.3039659 2.2384261
-1.3325488 -1.3226890 2.2403516
-1.2184564 -1.2132662 2.2406097
-1.5262474 -1.4576540 2.2411421
-1.5956624 -1.4928511 2.2438321
-1.4848145 -1.4320342 2.2457296
-1.0661006 -1.0129601 2.2468605
-1.5611140 -1.4743867 2.2484295
-1.1045948 -1.0734273 2.2492846
-1.2691551 -1.2659007 2.2515830
-1.3721263 -1.3537007 2.2529372
-1.4354936 -1.3977914 2.2530315
-1.1978702 -1.1915470 2.2535708
-1.1578190 -1.1449121 2.2536566
-1.3343093 -1.3235853 2.2545067
-1.4575859 -1.4132647 2.2545635
-1.4046115 -1.3768375 2.2559883
-1.3533389 -1.3382677 2.2584102
-1.7113304 -1.5331891 2.2586106
-1.3039637 -1.2972975 2.2617274
-1.0720767 -1.0311406 2.2619085
-1.5372107 -1.4567101 2.2646369
-1.1148379 -1.0931218 2.2652912
-1.2196377 -1.2162938 2.2655743
-1.0531399 -1.0039319 2.2672667
-1.3883689 -1.3630007 2.2684286
-1.5937254 -1.4832011 2.2695956
-1.4841815 -1.4249253 2.2704563
-1.4235630 -1.3870521 2.2721829
-1.0835853 -1.0529088 2.2733557
-1.2800443 -1.2748408 2.2739345
-1.5651956 -1.4672537 2.2755050
-0.9524085 -0.8048386 2.2764153
-1.3274556 -1.3162079 2.2765742
-1.4453174 -1.3995610 2.2765780
-1.1993534 -1.1964310 2.2810099
-1.6137391 -1.4855286 2.2843151
-1.2620354 -1.2587574 2.2849800
-1.0659329 -1.0325710 2.2859233
-1.6453963 -1.4973156 2.2860656
-1.3610806 -1.3406630 2.2863043
-1.5326094 -1.4473428 2.2867417
-1.3007982 -1.2929215 2.2880344
-1.1572774 -1.1503545 2.2885576
-1.1233432 -1.1107703 2.2895076
-1.2190864 -1.2173954 2.2902941
-1.4064742 -1.3712524 2.2909611
-1.3856038 -1.3571563 2.2922112
-1.4626267 -1.4066353 2.2936919
-0.9374174 -0.7902623 2.2948938
-1.5861625 -1.4697985 2.2949457
-1.3406191 -1.3243745 2.2957193
-1.0865956 -1.0650518 2.2957905
-1.4271253 -1.3824587 2.2999576
-1.5608295 -1.4566677 2.2999985
-1.1874432 -1.1854660 2.3002972
-0.9506198 -0.8306173 2.3010452
-1.1006139 -1.0859021 2.3020347
-1.1359258 -1.1282398 2.3022172
-0.9251800 -0.7674686 2.3033875
-1.2494286 -1.2474256 2.3048786
-1.0401836 -1.0017564 2.3065965
-1.0707702 -1.0477431 2.3069656
-1.2888229 -1.2815882 2.3075739
-1.2069187 -1.2058733 2.3085983
-1.3132576 -1.2998760 2.3115773
-0.9117145 -0.7429586 2.3129830
-1.3567345 -1.3330349 2.3133518
-1.4489507 -1.3928447 2.3145339
-1.2707916 -1.2648613 2.3149199
-1.5282142 -1.4341908 2.3172433
-1.5795982 -1.4576208 2.3174302
-1.3790995 -1.3477401 2.3184025
-1.1137324 -1.1061045 2.3191282
-1.1609251 -1.1600503 2.3191942
-0.9515634 -0.8506611 2.3194397
-1.0875981 -1.0740853 2.3211749
-1.3369373 -1.3181495 2.3213217
-0.8996042 -0.7216712 2.3232453
-1.2245968 -1.2233781 2.3232488
-1.5062054 -1.4211035 2.3232964
-1.5531586 -1.4437067 2.3243921
-1.2979709 -1.2860975 2.3309352
-1.2003765 -1.2000836 2.3321028
-1.4071909 -1.3619596 2.3341247
-1.2577892 -1.2530430 2.3356485
-1.1006816 -1.0937836 2.3358754
-1.4398585 -1.3816806 2.3359458
-0.8845544 -0.6937618 2.3363783
-1.0730672 -1.0590971 2.3367583
-0.9099826 -0.7760365 2.3394365
-1.1194100 -1.1166829 2.3403396
-1.3741300 -1.3395847 2.3419417
-1.3222984 -1.3027604 2.3443755
-1.2835863 -1.2731746 2.3455792
-1.2162303 -1.2149884 2.3458765
-1.3506712 -1.3226966 2.3463720
-1.5685197 -1.4418503 2.3473729
-1.4972404 -1.4093893 2.3476295
-1.0859869 -1.0783239 2.3477239
-1.5353335 -1.4264279 2.3491686
-1.4167149 -1.3636794 2.3494660
-0.8680591 -0.6644634 2.3501796
-1.1400542 -1.1396277 2.3523047
-1.1988389 -1.1991378 2.3593131
-1.4420530 -1.3758897 2.3609823
-1.1084213 -1.1068124 2.3614361
-1.3961869 -1.3480317 2.3627230
-1.1614125 -1.1623968 2.3634126
-0.9169004 -0.8179632 2.3640320
-1.2697182 -1.2591806 2.3643196
-1.3694681 -1.3311240 2.3656489
-1.3455230 -1.3144110 2.3701813
-1.4914514 -1.3986126 2.3709152
-1.2895422 -1.2743175 2.3716144
-1.5513178 -1.4245599 2.3717726
-1.2204575 -1.2174064 2.3727888
-1.0907660 -1.0886745 2.3731165
-0.9028455 -0.7988243 2.3732065
-1.1608741 -1.1623375 2.3791610
-1.1408400 -1.1423429 2.3791722
-1.4373068 -1.3663640 2.3833500
-1.1149928 -1.1168277 2.3838439
-1.1965976 -1.1962240 2.3839152
-1.5254509 -1.4084197 2.3850168
-1.0763424 -1.0744451 2.3879420
-1.3689477 -1.3250393 2.3894154
-1.2759860 -1.2610386 2.3921254
-1.3409468 -1.3054940 2.3943551
-1.4999384 -1.3920702 2.3969676
-0.8203730 -0.5795509 2.3973895
-1.0959109 -1.0982819 2.3978647
-1.2117723 -1.2083344 2.3986454
-1.1281728 -1.1319270 2.4011056
-1.1577379 -1.1600359 2.4047672
-1.4316971 -1.3565052 2.4056508
-0.8750039 -0.7669784 2.4068201
-1.1941199 -1.1931852 2.4103681
-1.0474514 -1.0448862 2.4115831
-1.3607057 -1.3137803 2.4128250
-1.2863718 -1.2641372 2.4143764
-0.8946416 -0.8189725 2.4148085
-1.1124527 -1.1157435 2.4148209
-1.3311291 -1.2936532 2.4202687
-1.5004970 -1.3837514 2.4209036
-1.0952968 -1.0997539 2.4247261
-1.4218735 -1.3446076 2.4257566
-1.2092165 -1.2037601 2.4263195
-1.0583664 -1.0596564 2.4274425
-1.5592036 -1.4009918 2.4315204
-1.2577099 -1.2400383 2.4341151
-1.1910697 -1.1890377 2.4364207
-1.2811765 -1.2562257 2.4380483
-1.1144035 -1.1188222 2.4399829
-1.4847426 -1.3686496 2.4399888
-0.9680820 -0.9522323 2.4419632
-1.3561181 -1.3028751 2.4432560
-1.4129746 -1.3329850 2.4461159
-0.8815315 -0.8165994 2.4473954
-1.0946509 -1.1006422 2.4494804
-1.2095646 -1.2010440 2.4542207
-1.2678455 -1.2432274 2.4595153
-0.9774502 -0.9694977 2.4605157
-1.0308717 -1.0337960 2.4612990
-1.1641202 -1.1637078 2.4614508
-1.1874779 -1.1832736 2.4616550
-1.2476756 -1.2282645 2.4621277
-1.3488647 -1.2928337 2.4649327
-1.1118547 -1.1169842 2.4654541
-1.2285298 -1.2139013 2.4666986
-1.4114822 -1.3238006 2.4704343
-1.0939453 -1.1002362 2.4770617
-1.4431324 -1.3361224 2.4775440
-1.1998684 -1.1900975 2.4826012
-0.8457432 -0.7763907 2.4835002
-1.2625647 -1.2346861 2.4836029
-1.1792457 -1.1748507 2.4838745
-1.0278548 -1.0340731 2.4864043
-1.5144029 -1.3610159 2.4869569
-1.2432487 -1.2202741 2.4878128
-1.3196004 -1.2689438 2.4883136
-1.1573595 -1.1552670 2.4885601
-1.3404148 -1.2807317 2.4896459
-1.2229524 -1.2063070 2.4899636
-1.1097823 -1.1145723 2.4917361
-1.4048362 -1.3117523 2.4953309
-0.9865761 -0.9898248 2.5013274
-1.0922866 -1.0989829 2.5042328
-1.1908860 -1.1800877 2.5064452
-1.2622714 -1.2286442 2.5077948
-1.1484871 -1.1473338 2.5108402
-1.2407346 -1.2133873 2.5121506
-1.2189284 -1.1989532 2.5137831
-1.3908794 -1.2987662 2.5143645
-0.9115588 -0.8994545 2.5166197
-1.1088933 -1.1127731 2.5182476
-1.3378349 -1.2702377 2.5185793
-1.0535922 -1.0617269 2.5207856
-1.1772176 -1.1674405 2.5239682
-0.9562535 -0.9578869 2.5240032
-0.9903685 -0.9974448 2.5244589
-0.7796094 -0.6755525 2.5265229
-1.0901009 -1.0962027 2.5300415
-1.2604618 -1.2217221 2.5327183
-0.9212233 -0.9175888 2.5331796
-1.2377716 -1.2066903 2.5353884
-1.2137469 -1.1906022 2.5376543
-1.0329949 -1.0425502 2.5385859
-1.1277127 -1.1258731 2.5392069
-1.3882307 -1.2876186 2.5395576
-1.3139926 -1.2483443 2.5457347
-1.1830927 -1.1670420 2.5483072
-0.9841695 -0.9938809 2.5500486
-1.1043212 -1.1060783 2.5518077
-1.0101476 -1.0202117 2.5532477
-1.3355640 -1.2550833 2.5583225
-1.2441205 -1.2052510 2.5587803
-0.8327143 -0.8021283 2.5592079
-1.0263229 -1.0371415 2.5619502
-1.2133369 -1.1842926 2.5631334
-1.2888638 -1.2295131 2.5635285
-1.0870275 -1.0914523 2.5639844
-1.1695720 -1.1545905 2.5654786
-0.9915536 -1.0029261 2.5725127
-1.3185726 -1.2415250 2.5752265
-1.2443296 -1.1989983 2.5829879
-1.1558278 -1.1411036 2.5835406
-1.3405166 -1.2492102 2.5837966
-1.0990071 -1.0988401 2.5873146
-1.1792971 -1.1568468 2.5885724
-1.2229877 -1.1820180 2.5960529
-0.8705505 -0.8689502 2.5962223
-0.9916176 -1.0042465 2.5980939
-1.0836668 -1.0850086 2.6028989
-1.2984856 -1.2217262 2.6029905
-1.1663651 -1.1441734 2.6056637
-1.0503342 -1.0566856 2.6088514
-1.2424563 -1.1896621 2.6115288
-0.8774486 -0.8833647 2.6184285
-0.9898434 -1.0025831 2.6230250
-1.3090609 -1.2195118 2.6256254
-1.1570330 -1.1327732 2.6281094
-1.0867003 -1.0838022 2.6285697
-1.2329658 -1.1778310 2.6328482
-1.2081934 -1.1622889 2.6399148
-1.0469216 -1.0504773 2.6422885
-0.8816938 -0.8931516 2.6430534
-1.1473326 -1.1228042 2.6485056
-1.0725695 -1.0702240 2.6498103
-0.9832976 -0.9963358 2.6514191
-1.2254910 -1.1657512 2.6588548
-1.2976585 -1.1998100 2.6636545
-1.0378298 -1.0424219 2.6648560
-0.8756341 -0.8897800 2.6670919
-1.1608821 -1.1257762 2.6697650
-1.0991280 -1.0850324 2.6713822
-1.0679930 -1.0635574 2.6735334
-0.9850922 -0.9976516 2.6763311
-0.9466268 -0.9619095 2.6812478
-1.0190633 -1.0244095 2.6821305
-1.2228467 -1.1566141 2.6833353
-1.1452515 -1.1119535 2.6863871
-0.8844495 -0.9011726 2.6883167
-0.7973101 -0.8013918 2.6960358
-1.0634079 -1.0562372 2.6972893
-0.9765038 -0.9883173 2.6993417
-0.9573029 -0.9719285 2.7056330
-1.2149614 -1.1443950 2.7064922
-1.1900482 -1.1310547 2.7095721
-0.8770842 -0.8956758 2.7119238
-1.1378580 -1.1008687 2.7125773
-0.6909912 -0.6514875 2.7131080
-0.6756408 -0.6252568 2.7136954
-0.6637573 -0.6041122 2.7164607
-1.2427281 -1.1537250 2.7165634
-0.6515022 -0.5818926 2.7191672
-0.7025572 -0.6747626 2.7196217
-1.0626655 -1.0508709 2.7209411
-0.9672031 -0.9794639 2.7211848
-0.6391171 -0.5594185 2.7221399
-0.7158554 -0.6980783 2.7226922
-1.0308083 -1.0280106 2.7240964
-1.2061862 -1.1337990 2.7266928
-0.7387185 -0.7341321 2.7288134
-0.6242747 -0.5336019 2.7291715
-0.9416786 -0.9565957 2.7345345
-0.6122407 -0.5129901 2.7358618
-1.1313563 -1.0901857 2.7371357
-0.8834934 -0.9030315 2.7378173
-0.5993989 -0.4895225 2.7426550
-1.0552678 -1.0414021 2.7443631
-0.7472794 -0.7505472 2.7452499
-0.9734567 -0.9818959 2.7452515
-0.7239935 -0.7196572 2.7461645
-0.5873730 -0.4683678 2.7498713
-1.2029546 -1.1237296 2.7499470
-0.7808937 -0.7936396 2.7525665
-0.8754161 -0.8954625 2.7594198
-1.0394970 -1.0277940 2.7599572
-0.5742773 -0.4461002 2.7600567
-1.1286919 -1.0822718 2.7606268
-0.7323758 -0.7364615 2.7630040
-0.7541581 -0.7646153 2.7649003
-0.9655844 -0.9733848 2.7667098
-1.0125773 -1.0071290 2.7680162
-1.0630449 -1.0410951 2.7684936
-1.1938719 -1.1112297 2.7719370
-0.5613770 -0.4296777 2.7735421
-0.6423148 -0.6050555 2.7747228
-1.1188821 -1.0701083 2.7823015
-1.0932834 -1.0558666 2.7829782
-1.0454834 -1.0261548 2.7840573
-0.8793238 -0.8987039 2.7857522
-0.7602871 -0.7771223 2.7877247
-0.7303476 -0.7422373 2.7898090
-0.9663935 -0.9707030 2.7914196
-0.5346911 -0.3760627 2.7919711
-0.7477886 -0.7658150 2.8056561
-1.0433475 -1.0188452 2.8087430
-0.8701216 -0.8896931 2.8092011
-1.1244062 -1.0647729 2.8092835
-0.9561918 -0.9593030 2.8144831
-0.7627250 -0.7836339 2.8161448
-1.1086581 -1.0521140 2.8233855
-1.1577319 -1.0744936 2.8249048
-0.7381262 -0.7581437 2.8286041
-0.5643173 -0.4989696 2.8304529
-1.0257439 -1.0020656 2.8317394
-0.8671344 -0.8862254 2.8333728
-0.9532119 -0.9528691 2.8387448
-0.8473373 -0.8676722 2.8390432
-0.7587949 -0.7824418 2.8414351
-1.1007491 -1.0406486 2.8464948
-1.0417054 -1.0069552 2.8509926
-0.7418759 -0.7650592 2.8545535
-0.8652357 -0.8822931 2.8588556
-0.9661675 -0.9571186 2.8613702
-0.9454401 -0.9423246 2.8655140
-0.7595226 -0.7845375 2.8661519
-1.1068231 -1.0345914 2.8719374
-1.0336196 -0.9960599 2.8731934
-0.5529524 -0.5140855 2.8757534
-0.5609043 -0.5294001 2.8767455
-0.5728897 -0.5504505 2.8781016
-0.7400498 -0.7661797 2.8797843
-0.8658003 -0.8802076 2.8830333
-0.5845219 -0.5712331 2.8842605
-0.8041600 -0.8271594 2.8857927
-1.0911473 -1.0219315 2.8867992
-0.5069359 -0.4330583 2.8878147
-1.0186589 -0.9831958 2.8888980
-0.7566426 -0.7832339 2.8919239
-0.5946094 -0.5904684 2.8922336
-0.9422160 -0.9342709 2.8943479
-0.8557357 -0.8698946 2.9036940
-0.7418108 -0.7689655 2.9066190
-0.6024457 -0.6158525 2.9107981
-0.5963247 -0.6002440 2.9124025
-1.0232061 -0.9784047 2.9137569
-0.9333288 -0.9236940 2.9144202
-0.7595181 -0.7862970 2.9181762
-0.6138559 -0.6261084 2.9196506
-0.6268162 -0.6430735 2.9227480
-0.8509538 -0.8633276 2.9272542
-1.0076535 -0.9651321 2.9273505
-0.7414386 -0.7695627 2.9317134
-1.2093702 -1.0467477 2.9333271
-0.9295900 -0.9161692 2.9381150
-0.6126759 -0.6309388 2.9403980
-0.4208398 -0.2834532 2.9449571
-0.6792957 -0.7078073 2.9477826
-0.7552904 -0.7818272 2.9491864
-0.6338782 -0.6576130 2.9518042
-0.8475524 -0.8573856 2.9529733
-1.0083708 -0.9573543 2.9536887
-0.7365353 -0.7648905 2.9569910
-0.9261348 -0.9076939 2.9624297
-0.6169580 -0.6415905 2.9652059
-0.7509852 -0.7768114 2.9739109
-0.8406713 -0.8478330 2.9777998
-0.6357629 -0.6637944 2.9779072
-0.9174281 -0.8971564 2.9841831
-0.7324330 -0.7601609 2.9843644
-0.9417872 -0.9099699 2.9891730
-0.6198054 -0.6486103 2.9900547
-0.7494907 -0.7744869 3.0006301
-0.8363016 -0.8396920 3.0025710
-0.6363012 -0.6670263 3.0030388
-0.9110647 -0.8878925 3.0058729
-0.7294454 -0.7560201 3.0091857
-0.9831345 -0.9259022 3.0096800
-0.6213900 -0.6535426 3.0173811
-0.8288133 -0.8302451 3.0269271
-0.7435419 -0.7664460 3.0285173
-0.9040700 -0.8770168 3.0299133
-0.6356723 -0.6689745 3.0340023
-0.7253029 -0.7510329 3.0353191
-0.7812454 -0.7915570 3.0502349
-0.7407692 -0.7617874 3.0526846
-0.8276956 -0.8238888 3.0528742
-0.8981745 -0.8669866 3.0532842
-0.6227511 -0.6574474 3.0574426
-0.7205108 -0.7443954 3.0644739
-0.8179639 -0.8121740 3.0750718
-0.6327670 -0.6672542 3.0777719
-0.8942276 -0.8564667 3.0787319
-0.7340273 -0.7524737 3.0836014
-0.8547472 -0.8317872 3.0844997
-0.7156840 -0.7372564 3.0909019
-0.8132163 -0.8039731 3.0979100
-0.6178827 -0.6542453 3.1000517
-0.8849820 -0.8448640 3.1009805
-0.7156366 -0.7337743 3.1155232
-0.8059350 -0.7938023 3.1203849
-0.6279456 -0.6618875 3.1255146
-0.7053034 -0.7230155 3.1365737
-0.8007211 -0.7846501 3.1434278
-0.6154217 -0.6502822 3.1434535
-0.7178730 -0.7280793 3.1576461
-0.6985441 -0.7132818 3.1667723
-0.8681319 -0.8131751 3.1668671
-0.7924469 -0.7728995 3.1675884
-0.6209645 -0.6530596 3.1690223
-0.8608627 -0.8063930 3.1775519
-0.6068838 -0.6412134 3.1870803
-0.6980429 -0.7077705 3.1916077
-0.7857332 -0.7629659 3.1918115
-0.6134601 -0.6432006 3.2103727
-0.6909920 -0.6983749 3.2137866
-0.7827003 -0.7520803 3.2183142
-0.6071596 -0.6350731 3.2332016
-0.6841394 -0.6889132 3.2368404
-0.7747176 -0.7392605 3.2462006
-0.5978931 -0.6257768 3.2539768
-0.6762627 -0.6791987 3.2582543
-0.7633602 -0.7276662 3.2658373
-0.5952774 -0.6199718 3.2790059
-0.6693211 -0.6694548 3.2805593
-0.5870816 -0.6102364 3.3009235
-0.6755252 -0.6670570 3.3047283
-0.6600557 -0.6543371 3.3186344
-0.5837403 -0.6036002 3.3241891
-0.6548088 -0.6454596 3.3406799
-0.5756197 -0.5934195 3.3465039
-0.6450668 -0.6322310 3.3667642
-0.5694601 -0.5850871 3.3690360
-0.6418045 -0.6228724 3.3934656
-0.5631336 -0.5752388 3.3935578
-0.6303740 -0.6100072 3.4141225
-0.5593873 -0.5671060 3.4172126
-0.5552696 -0.5589759 3.4410692
-0.5434412 -0.5463484 3.4617192
-0.5422387 -0.5387358 3.4859799
-0.5311381 -0.5276952 3.5064341
-0.5941297 -0.5493092 3.5397362
-0.5082757 -0.4882552 3.5938806
-0.4757436 -0.4370782 3.6947200
