# Supplementary material for: Fast Cylindrical Fitting Method Using Point Cloud’s Normals Estimation
Source: Hindawi journal article supplement (doi:10.1155/2018/8904653), 2018-12-12
Supplement: f1 [file 8904653.f1.zip › Point data/pipe2.txt]

-0.4114024 -0.2737223 2.9564141
-0.4143063 -0.2770458 2.9531227
-0.4154066 -0.2800656 2.9531420
-0.4156461 -0.2773601 2.9507314
-0.4161870 -0.2755325 2.9483623
-0.4170396 -0.2800484 2.9499397
-0.4208398 -0.2834532 2.9449571
-0.4992453 -0.4246153 2.8987492
-0.5010647 -0.4266890 2.8962324
-0.5020435 -0.4302201 2.8968139
-0.5029435 -0.4274598 2.8925179
-0.5041933 -0.4301570 2.8918036
-0.5069359 -0.4330583 2.8878147
-0.5260513 -0.3676956 2.8018582
-0.5281738 -0.3702408 2.7987004
-0.5294868 -0.3688093 2.7951011
-0.5295692 -0.3746970 2.7983024
-0.5304525 -0.3716268 2.7954416
-0.5319023 -0.3735117 2.7943186
-0.5346911 -0.3760627 2.7919711
-0.5579867 -0.4965436 2.8396754
-0.5605694 -0.4976008 2.8359645
-0.5634340 -0.5001086 2.8328679
-0.5643173 -0.4989696 2.8304529
-0.5613770 -0.4296777 2.7735421
-0.5638149 -0.4336060 2.7715734
-0.5645086 -0.4314502 2.7688845
-0.5656888 -0.4371154 2.7704564
-0.5662194 -0.4355701 2.7684153
-0.5669060 -0.4391914 2.7695892
-0.5667864 -0.4325871 2.7653636
-0.5685695 -0.4399104 2.7668713
-0.5700569 -0.4446742 2.7674155
-0.5704358 -0.4398343 2.7632676
-0.5712505 -0.4427997 2.7636986
-0.5742773 -0.4461002 2.7600567
-0.5804822 -0.4625096 2.7597246
-0.5821263 -0.4654717 2.7586255
-0.5840104 -0.4691710 2.7577617
-0.5840632 -0.4672922 2.7560170
-0.5865311 -0.4697928 2.7528073
-0.5871430 -0.4729781 2.7542976
-0.5873730 -0.4683678 2.7498713
-0.5895228 -0.4750280 2.7507731
-0.5910120 -0.4813187 2.7537169
-0.5901648 -0.4736912 2.7482262
-0.5906610 -0.4777423 2.7507766
-0.5914906 -0.4768723 2.7480265
-0.5924260 -0.4814701 2.7506049
-0.5930913 -0.4789973 2.7464870
-0.5943559 -0.4867409 2.7515903
-0.5960861 -0.4876767 2.7484906
-0.5962099 -0.4842485 2.7446272
-0.6000646 -0.4968024 2.7487662
-0.5993989 -0.4895225 2.7426550
-0.6023228 -0.5001178 2.7467004
-0.6053530 -0.5072111 2.7468764
-0.6057996 -0.5047111 2.7430233
-0.6054567 -0.5024089 2.7413569
-0.6075757 -0.5092648 2.7436409
-0.6082074 -0.5123147 2.7454294
-0.6089052 -0.5097720 2.7408248
-0.6087704 -0.5065504 2.7375753
-0.6108811 -0.5132438 2.7396021
-0.6125738 -0.5153183 2.7377334
-0.6122407 -0.5129901 2.7358618
-0.6155339 -0.5243693 2.7411328
-0.6158946 -0.5187866 2.7334251
-0.6183994 -0.5294485 2.7396969
-0.6183640 -0.5263954 2.7360685
-0.6190200 -0.5287906 2.7371757
-0.6212285 -0.5344348 2.7382843
-0.6219183 -0.5333253 2.7349991
-0.6216280 -0.5305183 2.7323771
-0.6213453 -0.5285344 2.7306011
-0.6237432 -0.5390785 2.7372354
-0.6229288 -0.5329821 2.7319205
-0.6242747 -0.5336019 2.7291715
-0.6268715 -0.5442290 2.7354011
-0.6258051 -0.5371018 2.7294950
-0.6266499 -0.5414229 2.7325812
-0.6272532 -0.5392754 2.7284247
-0.6293034 -0.5476017 2.7332176
-0.6290103 -0.5448637 2.7307490
-0.6299973 -0.5501614 2.7344603
-0.6308945 -0.5493321 2.7312112
-0.6305301 -0.5459001 2.7281521
-0.6329933 -0.5546229 2.7319625
-0.6332766 -0.5531229 2.7295760
-0.6330201 -0.5510713 2.7278996
-0.6332014 -0.5492456 2.7253430
-0.6355850 -0.5544872 2.7253327
-0.6361706 -0.5571536 2.7267367
-0.6387067 -0.5654471 2.7297172
-0.6391171 -0.5594185 2.7221399
-0.6411287 -0.5696852 2.7290778
-0.6413682 -0.5679283 2.7263695
-0.6435205 -0.5738909 2.7284010
-0.6438824 -0.5711662 2.7242773
-0.6454189 -0.5761370 2.7266308
-0.6443733 -0.5686000 2.7201293
-0.6460722 -0.5753660 2.7241135
-0.6482768 -0.5823062 2.7274186
-0.6466207 -0.5734199 2.7205157
-0.6486110 -0.5806927 2.7245415
-0.6486898 -0.5786012 2.7218136
-0.6516403 -0.5852357 2.7228273
-0.6528207 -0.5890592 2.7247413
-0.6533560 -0.5915959 2.7266086
-0.6515022 -0.5818926 2.7191672
-0.6533078 -0.5873894 2.7214742
-0.6558855 -0.5959150 2.7258801
-0.6540488 -0.5863171 2.7183341
-0.6560104 -0.5939809 2.7231210
-0.6562247 -0.5925246 2.7206400
-0.6574655 -0.5965342 2.7226765
-0.6582935 -0.6002618 2.7253556
-0.6565430 -0.5906857 2.7175599
-0.6588691 -0.5978622 2.7207966
-0.6606515 -0.6044927 2.7247300
-0.6589088 -0.5949704 2.7171010
-0.6601441 -0.6002176 2.7207090
-0.6612661 -0.5991145 2.7164951
-0.6622019 -0.6030299 2.7189927
-0.6643314 -0.6076122 2.7193774
-0.6637573 -0.6041122 2.7164607
-0.6651427 -0.6065675 2.7160204
-0.6667874 -0.6114329 2.7179380
-0.6688756 -0.6124144 2.7139681
-0.7755354 -0.6751435 2.5329444
-0.7796094 -0.6755525 2.5265229
-0.8123624 -0.5704795 2.4076139
-0.8150865 -0.5745956 2.4046299
-0.8156167 -0.5705870 2.4017505
-0.8165927 -0.5749232 2.4020489
-0.8176220 -0.5798275 2.4025216
-0.8189165 -0.5789727 2.3997603
-0.8203730 -0.5795509 2.3973895
-0.8347152 -0.7635139 2.4914108
-0.8368503 -0.7674902 2.4913212
-0.8379135 -0.7671619 2.4890561
-0.8390793 -0.7713721 2.4909422
-0.8411626 -0.7710630 2.4868233
-0.8413928 -0.7685261 2.4839753
-0.8435183 -0.7725066 2.4838804
-0.8457432 -0.7763907 2.4835002
-0.8599759 -0.6554163 2.3603680
-0.8615984 -0.6580527 2.3588747
-0.8655301 -0.7567201 2.4145916
-0.8634330 -0.6593361 2.3560445
-0.8672573 -0.7592208 2.4136238
-0.8641106 -0.6576068 2.3535175
-0.8648928 -0.6638205 2.3561214
-0.8655680 -0.6609139 2.3528075
-0.8708546 -0.7658747 2.4126378
-0.8680591 -0.6644634 2.3501796
-0.8723565 -0.7616661 2.4072499
-0.8734175 -0.7653263 2.4081683
-0.8750039 -0.7669784 2.4068201
-0.8755099 -0.6837334 2.3465083
-0.8784566 -0.6870524 2.3432372
-0.8800028 -0.6858038 2.3398362
-0.8800610 -0.6916910 2.3430512
-0.8808294 -0.6885200 2.3399241
-0.8930437 -0.8165220 2.4157044
-0.8845544 -0.6937618 2.3363783
-0.8946416 -0.8189725 2.4148085
-0.8913859 -0.7104955 2.3323062
-0.8916910 -0.7077242 2.3293195
-0.8922107 -0.7131263 2.3326440
-0.8925921 -0.7111274 2.3301474
-0.8940095 -0.7155894 2.3306709
-0.8950225 -0.7185625 2.3308842
-0.9022042 -0.8106901 2.3869477
-0.8956868 -0.7142577 2.3258596
-0.8965280 -0.7181095 2.3271463
-0.9048468 -0.8152764 2.3859566
-0.9028455 -0.7988243 2.3732065
-0.9058831 -0.8142401 2.3834196
-0.8996042 -0.7216712 2.3232453
-0.9073753 -0.8199132 2.3848983
-0.9048725 -0.8033587 2.3725411
-0.9085523 -0.8191882 2.3825215
-0.9088290 -0.8157268 2.3794822
-0.9073499 -0.8077769 2.3717139
-0.9104945 -0.8220176 2.3811944
-0.9112630 -0.8200836 2.3787173
-0.9090970 -0.8060555 2.3682261
-0.9044442 -0.7726581 2.3448762
-0.9047668 -0.7702074 2.3436400
-0.9103772 -0.8107500 2.3690987
-0.9133471 -0.8245923 2.3780837
-0.9116942 -0.8087556 2.3660600
-0.9073680 -0.7711137 2.3408489
-0.9081649 -0.7783852 2.3424223
-0.9141008 -0.8149028 2.3662586
-0.9075434 -0.7418403 2.3188342
-0.9099826 -0.7760365 2.3394365
-0.9096001 -0.7566457 2.3243492
-0.9095170 -0.7446262 2.3173886
-0.9169004 -0.8179632 2.3640320
-0.9117145 -0.7429586 2.3129830
-0.9121504 -0.7458398 2.3139761
-0.9123829 -0.7491095 2.3156026
-0.9126579 -0.7621609 2.3225865
-0.9133934 -0.7607422 2.3206791
-0.9136669 -0.7521355 2.3153826
-0.9143030 -0.7635129 2.3206209
-0.9145220 -0.7492644 2.3122011
-0.9158736 -0.7550251 2.3132571
-0.9168969 -0.7579074 2.3129728
-0.9180603 -0.7541639 2.3087384
-0.9186120 -0.7582906 2.3099759
-0.9191675 -0.7679733 2.3155795
-0.9202320 -0.7645825 2.3110938
-0.9215383 -0.7605552 2.3058428
-0.9219024 -0.7650323 2.3081632
-0.9231904 -0.7677386 2.3075814
-0.9235863 -0.7703509 2.3087075
-0.9254696 -0.7720650 2.3061699
-0.9251800 -0.7674686 2.3033875
-0.9265666 -0.7758451 2.3067876
-0.9267628 -0.7739517 2.3049008
-0.9289889 -0.7785466 2.3038405
-0.9285309 -0.7726127 2.3001969
-0.9293875 -0.7811574 2.3051587
-0.9296370 -0.7769401 2.3012231
-0.9314179 -0.7791136 2.2990022
-0.9322524 -0.7863077 2.3032807
-0.9329837 -0.7852520 2.3006775
-0.9343718 -0.7845944 2.2968878
-0.9357777 -0.7875020 2.2961895
-0.9368276 -0.7935046 2.2992640
-0.9405919 -0.8377533 2.3273791
-0.9374174 -0.7902623 2.2948938
-0.9428837 -0.8416796 2.3270512
-0.9429063 -0.8399436 2.3251020
-0.9413148 -0.8210131 2.3094824
-0.9422233 -0.8288378 2.3147684
-0.9450271 -0.8455726 2.3269471
-0.9407754 -0.8008842 2.2963752
-0.9405004 -0.7972681 2.2939249
-0.9412964 -0.7966572 2.2915758
-0.9442645 -0.8330367 2.3144511
-0.9440332 -0.8255605 2.3085307
-0.9465213 -0.8424533 2.3205411
-0.9421166 -0.7999972 2.2926239
-0.9436295 -0.8040760 2.2926589
-0.9490604 -0.8465819 2.3200019
-0.9433734 -0.7951230 2.2849976
-0.9448516 -0.8026494 2.2889665
-0.9454630 -0.8051853 2.2896356
-0.9482017 -0.8335128 2.3079555
-0.9461221 -0.8094484 2.2913424
-0.9479054 -0.8260678 2.3019981
-0.9515634 -0.8506611 2.3194397
-0.9460221 -0.7997091 2.2840051
-0.9472025 -0.8127079 2.2915982
-0.9493107 -0.8284779 2.3015457
-0.9509175 -0.8380613 2.3070029
-0.9482236 -0.8103354 2.2878217
-0.9481041 -0.8081826 2.2864854
-0.9506198 -0.8306173 2.3010452
-0.9495663 -0.8144582 2.2882532
-0.9499432 -0.8177330 2.2901474
-0.9493094 -0.7998172 2.2781644
-0.9507781 -0.8133755 2.2853207
-0.9524085 -0.8048386 2.2764153
-0.9531346 -0.8178765 2.2842521
-1.1020181 -1.0020002 2.1347136
-1.1036291 -1.0052430 2.1340631
-1.1065111 -1.0040710 2.1280410
-1.1084005 -1.0083451 2.1276419
-1.1096173 -1.0168026 2.1336393
-1.1116708 -1.0209956 2.1333162
-1.1122099 -1.0195777 2.1307128
-1.1144084 -1.0198101 2.1260981
-1.1158606 -1.0223149 2.1261824
-1.1184562 -1.0324626 2.1327561
-1.1198902 -1.0350907 2.1325911
-1.1212427 -1.0350803 2.1295271
-1.1225993 -1.0339187 2.1253602
-1.1245503 -1.0381645 2.1249878
-1.2242860 -1.1369088 2.0011398
-1.2263094 -1.1353911 1.9945365
-1.2238302 -1.1194538 1.9799481
-1.2286516 -1.1390533 1.9944093
-1.2264088 -1.1228050 1.9781341
-1.2324486 -1.1413032 1.9890941
-1.2292655 -1.1290081 1.9775589
-1.2301582 -1.1239945 1.9733812
-1.2308824 -1.1322001 1.9770053
-1.2346419 -1.1437208 1.9875943
-1.2320333 -1.1281432 1.9731248
-1.2340748 -1.1321367 1.9724773
-1.2360183 -1.1355257 1.9717553
-1.2394846 -1.1488608 1.9780678
-1.2419021 -1.1523042 1.9781450
-1.2428170 -1.1557588 1.9775067
-1.2447160 -1.1532220 1.9718534
-1.2471341 -1.1566597 1.9719331
-1.2480481 -1.1601198 1.9712925
-1.2671419 -1.1728626 1.9401468
-1.2694531 -1.1730223 1.9364589
-1.2712160 -1.1732716 1.9337254
-1.2804895 -1.1805193 1.9174903
-1.2823857 -1.1845163 1.9173776
-1.2844222 -1.1875740 1.9164880
-1.2847634 -1.1853020 1.9142302
-1.2863293 -1.1912819 1.9165774
-1.2880596 -1.1949438 1.9167961
-1.2872007 -1.1863014 1.9106062
-1.2897575 -1.1977183 1.9164778
-1.2886599 -1.1892420 1.9105187
-1.2903116 -1.1928672 1.9106793
-1.2921742 -1.1964781 1.9105864
-1.2938246 -1.1994642 1.9104095
-1.2957992 -1.2029823 1.9104200
-1.3164697 -1.2151066 1.8721213
-1.3183706 -1.2178909 1.8715365
-1.3202254 -1.2213119 1.8719170
-1.3190848 -1.2139915 1.8648482
-1.3218507 -1.2239327 1.8717410
-1.3206424 -1.2165496 1.8647388
-1.3197581 -1.2040786 1.8521833
-1.3239173 -1.2223891 1.8651576
-1.3213346 -1.2075660 1.8512325
-1.3256291 -1.2256728 1.8656841
-1.3244188 -1.2182919 1.8586808
-1.3273490 -1.2289518 1.8662141
-1.3236197 -1.2114022 1.8509121
-1.3266857 -1.2219997 1.8585186
-1.3251455 -1.2114156 1.8482802
-1.3257195 -1.2087618 1.8453614
-1.3272717 -1.2137586 1.8468124
-1.3272578 -1.2122681 1.8443915
-1.3297646 -1.2159907 1.8441840
-1.3550003 -1.2425402 1.8135287
-1.3588859 -1.2614411 1.8275346
-1.3566060 -1.2454346 1.8130978
-1.3604522 -1.2640136 1.8274100
-1.3528792 -1.2098446 1.7856330
-1.3586055 -1.2439308 1.8064840
-1.3543667 -1.2152010 1.7845236
-1.3550795 -1.2128311 1.7831580
-1.3553356 -1.2102725 1.7813983
-1.3603807 -1.2471774 1.8070386
-1.3541900 -1.1969552 1.7712393
-1.3646124 -1.2662555 1.8206125
-1.3659787 -1.2686946 1.8206366
-1.3579065 -1.2172814 1.7802654
-1.3566307 -1.2015469 1.7702270
-1.3572081 -1.1992924 1.7671806
-1.3588942 -1.2060467 1.7692961
-1.3602895 -1.2198967 1.7776790
-1.3600294 -1.2022997 1.7638215
-1.3607870 -1.2084177 1.7673869
-1.3605613 -1.2046521 1.7646889
-1.3631081 -1.2143184 1.7674808
-1.3626162 -1.2071795 1.7625254
-1.3654173 -1.2187892 1.7665773
-1.3649015 -1.2139267 1.7634150
-1.3649900 -1.2118357 1.7614429
-1.3721627 -1.2579927 1.7907528
-1.3670230 -1.2186750 1.7630060
-1.3677992 -1.2233942 1.7655502
-1.3672062 -1.2164445 1.7607232
-1.3662506 -1.2035795 1.7514500
-1.3760158 -1.2719273 1.7978214
-1.3740684 -1.2613576 1.7896406
-1.3702077 -1.2279913 1.7645352
-1.3700097 -1.2256202 1.7629094
-1.3777185 -1.2752153 1.7983437
-1.3680619 -1.2058686 1.7498691
-1.3755935 -1.2650449 1.7900641
-1.3697834 -1.2213024 1.7594518
-1.3688092 -1.2083118 1.7502989
-1.3769828 -1.2683112 1.7906087
-1.3725314 -1.2317028 1.7630770
-1.3722760 -1.2279482 1.7601924
-1.3754429 -1.2546571 1.7781389
-1.3773108 -1.2624052 1.7844972
-1.3732136 -1.2304958 1.7606314
-1.3719029 -1.2194459 1.7532008
-1.3729281 -1.2259694 1.7570680
-1.3768994 -1.2572751 1.7779840
-1.3788112 -1.2660306 1.7847166
-1.3742669 -1.2337680 1.7614077
-1.3746764 -1.2359984 1.7626639
-1.3719773 -1.2083584 1.7445062
-1.3813166 -1.2762483 1.7916395
-1.3738015 -1.2235412 1.7529813
-1.3804601 -1.2688703 1.7846007
-1.3736874 -1.2172244 1.7476420
-1.3829983 -1.2795489 1.7921506
-1.3738379 -1.2127183 1.7440171
-1.3768083 -1.2400586 1.7621108
-1.3824683 -1.2725164 1.7845167
-1.3769837 -1.2343684 1.7563493
-1.3755278 -1.2210791 1.7472440
-1.3812922 -1.2583127 1.7722720
-1.3787797 -1.2434293 1.7612824
-1.3779513 -1.2367293 1.7565073
-1.3758774 -1.2171511 1.7434702
-1.3772485 -1.2248209 1.7472907
-1.3788896 -1.2340771 1.7522650
-1.3807782 -1.2475113 1.7610689
-1.3766269 -1.2067439 1.7342384
-1.3831680 -1.2625926 1.7718657
-1.3798483 -1.2406830 1.7561228
-1.3781743 -1.2208282 1.7420544
-1.3789907 -1.2279186 1.7467499
-1.3777089 -1.1976898 1.7275168
-1.3824272 -1.2493060 1.7590258
-1.3828363 -1.2516100 1.7604981
-1.3824878 -1.2472763 1.7567813
-1.3823267 -1.2451698 1.7552226
-1.3789792 -1.2114472 1.7330912
-1.3849937 -1.2559063 1.7600708
-1.3846286 -1.2496557 1.7543256
-1.3819181 -1.2118361 1.7285967
-1.3871492 -1.2595295 1.7586931
-1.3862202 -1.2532260 1.7541703
-1.3883952 -1.2606025 1.7567391
-1.3877695 -1.2556844 1.7530681
-1.3893077 -1.2637924 1.7580231
-1.3923966 -1.2808322 1.7698850
-1.3912179 -1.2680164 1.7579415
-1.3943419 -1.2846008 1.7699239
-1.3908470 -1.2618294 1.7521424
-1.3962056 -1.2884587 1.7699282
-1.3932353 -1.2712091 1.7569374
-1.3927800 -1.2658553 1.7519329
-1.3960722 -1.2828031 1.7636099
-1.3951914 -1.2751740 1.7568339
-1.3946602 -1.2691346 1.7511686
-1.3976656 -1.2856651 1.7632116
-1.3972139 -1.2790563 1.7564958
-1.3967102 -1.2729964 1.7508451
-1.4000290 -1.2915753 1.7645994
-1.3991053 -1.2822374 1.7558202
-1.3986880 -1.2770333 1.7506723
-1.4010356 -1.2860569 1.7558111
-1.4007473 -1.2802931 1.7496043
-1.4028519 -1.2898812 1.7558474
-1.4027845 -1.2843433 1.7494144
-1.4047070 -1.2929040 1.7550244
-1.4047948 -1.2882791 1.7493325
-1.4066062 -1.2966905 1.7550506
-1.4066239 -1.2913648 1.7484496
-1.4084105 -1.2997748 1.7544670
-1.4084755 -1.2950180 1.7486076
-1.4103571 -1.3035463 1.7542515
-1.4001379 -1.2252071 1.7000534
-1.4101290 -1.2986796 1.7490652
-1.4120606 -1.3072998 1.7546132
-1.4118621 -1.3014753 1.7484683
-1.4027928 -1.2303041 1.6986513
-1.4137777 -1.3100338 1.7540823
-1.4135886 -1.3050616 1.7486989
-1.4153377 -1.3134553 1.7547272
-1.4170788 -1.3167871 1.7552013
-1.4152476 -1.3079399 1.7482805
-1.4052860 -1.2350763 1.6974354
-1.4053475 -1.2295763 1.6938261
-1.4168730 -1.3114867 1.7485966
-1.4067985 -1.2373944 1.6963142
-1.4185001 -1.3148871 1.7490201
-1.4080663 -1.2347262 1.6923775
-1.4199523 -1.3176576 1.7489511
-1.4217665 -1.3211169 1.7492987
-1.4102888 -1.2409843 1.6926296
-1.4114112 -1.2520987 1.6981600
-1.4146325 -1.2683952 1.7074819
-1.4132317 -1.2444339 1.6898081
-1.4139021 -1.2567195 1.6967370
-1.4161500 -1.2613908 1.6959698
-1.4165214 -1.2565066 1.6918760
-1.4183437 -1.2652245 1.6947591
-1.4188276 -1.2609901 1.6909450
-1.4205257 -1.2696600 1.6938590
-1.4210352 -1.2656055 1.6902340
-1.4233354 -1.2701513 1.6892339
-1.4334558 -1.3277350 1.7253834
-1.4358892 -1.3313357 1.7252955
-1.4394137 -1.3381418 1.7248234
-1.4392170 -1.3333382 1.7206489
-1.4283049 -1.2517360 1.6640115
-1.4407876 -1.3407415 1.7246891
-1.4289427 -1.2433167 1.6570316
-1.4401701 -1.3327317 1.7179662
-1.4301709 -1.2560199 1.6635996
-1.4416764 -1.3360999 1.7183875
-1.4320460 -1.2480622 1.6555690
-1.4322122 -1.2457265 1.6532284
-1.4446706 -1.3424834 1.7186207
-1.4336868 -1.2567893 1.6584149
-1.4334524 -1.2453810 1.6503673
-1.4347044 -1.2531654 1.6540443
-1.4349031 -1.2483224 1.6497185
-1.4359591 -1.2607691 1.6566851
-1.4364536 -1.2554378 1.6519350
-1.4371835 -1.2585013 1.6527144
-1.4366654 -1.2509915 1.6481196
-1.4394882 -1.2611538 1.6499800
-1.4399065 -1.2636064 1.6509332
-1.4395424 -1.2564363 1.6463609
-1.4420320 -1.2624222 1.6457293
-1.4424822 -1.2679960 1.6488149
-1.4432418 -1.2804107 1.6559813
-1.4432880 -1.2667143 1.6461542
-1.4453775 -1.2832057 1.6539514
-1.4444106 -1.2663735 1.6435460
-1.4449135 -1.2729369 1.6474356
-1.4464242 -1.2813109 1.6506304
-1.4542208 -1.3401140 1.6910478
-1.4467049 -1.2763964 1.6463181
-1.4465918 -1.2711866 1.6427144
-1.4562340 -1.3436079 1.6911142
-1.4485871 -1.2850463 1.6491409
-1.4580197 -1.3463960 1.6907657
-1.4486559 -1.2752354 1.6412416
-1.4492485 -1.2782371 1.6425145
-1.4496231 -1.2826083 1.6453202
-1.4500065 -1.2807824 1.6430770
-1.4506723 -1.2895336 1.6485426
-1.4585493 -1.3422817 1.6843014
-1.4508781 -1.2798612 1.6401673
-1.4600005 -1.3447610 1.6842772
-1.4520594 -1.2865263 1.6436712
-1.4589017 -1.3374565 1.6771899
-1.4617521 -1.3481030 1.6847447
-1.4550890 -1.3081187 1.6554841
-1.4534264 -1.2843957 1.6392178
-1.4523964 -1.2726952 1.6317365
-1.4609248 -1.3409408 1.6772628
-1.4543263 -1.2910095 1.6427455
-1.4633461 -1.3507018 1.6845943
-1.4563475 -1.3052202 1.6504847
-1.4570797 -1.3123490 1.6551377
-1.4626951 -1.3437401 1.6769069
-1.4558906 -1.2890426 1.6381442
-1.4563814 -1.2955133 1.6421278
-1.4638220 -1.3466184 1.6781057
-1.4556935 -1.2776378 1.6300949
-1.4583365 -1.3094519 1.6501361
-1.4590165 -1.3166026 1.6547630
-1.4569548 -1.2939885 1.6399284
-1.4654977 -1.3499006 1.6786366
-1.4643284 -1.3425177 1.6716307
-1.4584378 -1.2991915 1.6410323
-1.4583253 -1.2929175 1.6365401
-1.4602379 -1.3132792 1.6497778
-1.4658794 -1.3451053 1.6714946
-1.4586347 -1.2780253 1.6256021
-1.4609483 -1.3099791 1.6454796
-1.4617609 -1.3164772 1.6494513
-1.4600243 -1.2968370 1.6362659
-1.4606736 -1.3034939 1.6402864
-1.4675645 -1.3483802 1.6720318
-1.4585472 -1.2670470 1.6171305
-1.4633583 -1.3139018 1.6438177
-1.4600134 -1.2698856 1.6160554
-1.4629862 -1.3078817 1.6393913
-1.4626770 -1.3019063 1.6349983
-1.4610217 -1.2722847 1.6155375
-1.4612565 -1.2670341 1.6130159
-1.4660745 -1.3252639 1.6481161
-1.4652171 -1.3125751 1.6386632
-1.4650372 -1.3100782 1.6369081
-1.4647850 -1.3063165 1.6344797
-1.4635744 -1.2774915 1.6139988
-1.4637874 -1.2714311 1.6108932
-1.4682684 -1.3279863 1.6463008
-1.4669260 -1.3135715 1.6358918
-1.4643275 -1.2746316 1.6113450
-1.4667919 -1.3099688 1.6330639
-1.4676026 -1.3170987 1.6377180
-1.4650108 -1.2777532 1.6117397
-1.4661258 -1.2824493 1.6125839
-1.4662447 -1.2766546 1.6093109
-1.4688841 -1.3144565 1.6324598
-1.4698736 -1.3208271 1.6362365
-1.4710820 -1.3301223 1.6426607
-1.4711325 -1.3190353 1.6317664
-1.4685534 -1.2865232 1.6107884
-1.4721467 -1.3250542 1.6355257
-1.4688279 -1.2818509 1.6077915
-1.4742846 -1.3347063 1.6401147
-1.4742455 -1.3287780 1.6343501
-1.4736408 -1.3228713 1.6298785
-1.4740974 -1.3262136 1.6322856
-1.4820608 -1.3779445 1.6689367
-1.4713893 -1.2868254 1.6063598
-1.4839326 -1.3804925 1.6685730
-1.4765173 -1.3331931 1.6335138
-1.4761674 -1.3292392 1.6304815
-1.4786586 -1.3377569 1.6329032
-1.4785847 -1.3320865 1.6278330
-1.4791972 -1.3364737 1.6305055
-1.4772931 -1.3202822 1.6178587
-1.4797100 -1.3350516 1.6281117
-1.4808029 -1.3420567 1.6321057
-1.4879705 -1.3826558 1.6620911
-1.4809282 -1.3394771 1.6294025
-1.4897738 -1.3858690 1.6626746
-1.4795455 -1.3233963 1.6169256
-1.4827076 -1.3455787 1.6311292
-1.4792079 -1.3069933 1.6048321
-1.4829322 -1.3402365 1.6258124
-1.4813052 -1.3275250 1.6166659
-1.4846402 -1.3495497 1.6310279
-1.4838226 -1.3436398 1.6269639
-1.4843249 -1.3471555 1.6291454
-1.4878370 -1.3670358 1.6421664
-1.4826445 -1.3245913 1.6117016
-1.4816175 -1.3109911 1.6031007
-1.4865076 -1.3526822 1.6300719
-1.4867811 -1.3506341 1.6272657
-1.4903312 -1.3706102 1.6421076
-1.4870083 -1.3478735 1.6242301
-1.4882979 -1.3564421 1.6301256
-1.4848813 -1.3287732 1.6110253
-1.4839122 -1.3156994 1.6019417
-1.4841195 -1.3114734 1.5984547
-1.4846692 -1.3230807 1.6051023
-1.4900895 -1.3601976 1.6302340
-1.4889000 -1.3519155 1.6240604
-1.4870956 -1.3330481 1.6103201
-1.4858992 -1.3205076 1.6010946
-1.4867294 -1.3272827 1.6047848
-1.4918481 -1.3632044 1.6296929
-1.4906880 -1.3557978 1.6240443
-1.4861754 -1.3153951 1.5971198
-1.4936828 -1.3717780 1.6352966
-1.4865944 -1.3097893 1.5920824
-1.4936065 -1.3670132 1.6297449
-1.4880621 -1.3251172 1.6003773
-1.4896332 -1.3373491 1.6086727
-1.4953049 -1.3751034 1.6357858
-1.4923463 -1.3588526 1.6234589
-1.4884964 -1.3200979 1.5959727
-1.4884611 -1.3140728 1.5916717
-1.4977161 -1.3847332 1.6403727
-1.4953887 -1.3700877 1.6291344
-1.4940893 -1.3625487 1.6235796
-1.4951955 -1.3676478 1.6266904
-1.4899137 -1.3281949 1.5994450
-1.4896971 -1.3250940 1.5973542
-1.4920524 -1.3420344 1.6075637
-1.4989027 -1.3886700 1.6405948
-1.4972910 -1.3739937 1.6290831
-1.4902504 -1.3183854 1.5912222
-1.4957968 -1.3656910 1.6229485
-1.4909721 -1.3250093 1.5947186
-1.4909948 -1.3138653 1.5864249
-1.4925182 -1.3327995 1.5984312
-1.5007506 -1.3878935 1.6373809
-1.4992993 -1.3778060 1.6288257
-1.4984082 -1.3729197 1.6249656
-1.4978122 -1.3696208 1.6225712
-1.4991158 -1.3753652 1.6262703
-1.4924193 -1.3198267 1.5880086
-1.4936207 -1.3299608 1.5933501
-1.4953439 -1.3429121 1.6022778
-1.5036582 -1.3971165 1.6408674
-1.5010540 -1.3809188 1.6282125
-1.4998287 -1.3736812 1.6223701
-1.4933456 -1.3185668 1.5852822
-1.5027593 -1.3891895 1.6340752
-1.5052788 -1.4004462 1.6413551
-1.5016467 -1.3789065 1.6242874
-1.5028529 -1.3845915 1.6283578
-1.4970642 -1.3472552 1.6017994
-1.5044222 -1.3924954 1.6345785
-1.5017468 -1.3769229 1.6216230
-1.4955527 -1.3278798 1.5876873
-1.4956916 -1.3232676 1.5841347
-1.5045946 -1.3875569 1.6278516
-1.5036893 -1.3827125 1.6238058
-1.5036310 -1.3806667 1.6214428
-1.4972833 -1.3301932 1.5857974
-1.5064114 -1.3913376 1.6279251
-1.4977944 -1.3326214 1.5864847
-1.4995902 -1.3455291 1.5954355
-1.5091190 -1.4030720 1.6364663
-1.5052434 -1.3835723 1.6210039
-1.5084901 -1.3951718 1.6276490
-1.5069673 -1.3871271 1.6212701
-1.5075812 -1.3897878 1.6230372
-1.5017658 -1.3499763 1.5945551
-1.5110521 -1.4052263 1.6344572
-1.5006252 -1.3338794 1.5822230
-1.5073670 -1.3832062 1.6149079
-1.5104366 -1.3963676 1.6244315
-1.5038387 -1.3537657 1.5933304
-1.5121150 -1.4019200 1.6272082
-1.5037380 -1.3441157 1.5849097
-1.5043275 -1.3500974 1.5889871
-1.5094605 -1.3861937 1.6141060
-1.5035713 -1.3373780 1.5795667
-1.5135374 -1.4045722 1.6270222
-1.5058256 -1.3582181 1.5927589
-1.5150343 -1.4079787 1.6274485
-1.5059360 -1.3485583 1.5843586
-1.5135340 -1.3986696 1.6196076
-1.5065757 -1.3545272 1.5881257
-1.5061586 -1.3465066 1.5820887
-1.5079064 -1.3625412 1.5919944
-1.5165380 -1.4106911 1.6272010
-1.5124189 -1.3876600 1.6086198
-1.5087212 -1.3589979 1.5875402
-1.5082385 -1.3523262 1.5828453
-1.5099526 -1.3662493 1.5908607
-1.5167955 -1.4049801 1.6196119
-1.5086576 -1.3492707 1.5794743
-1.5148895 -1.3912477 1.6085507
-1.5190998 -1.4130804 1.6238028
-1.5182904 -1.4083519 1.6200666
-1.5171824 -1.4016508 1.6150671
-1.5107953 -1.3627067 1.5863989
-1.5106675 -1.3569052 1.5818455
-1.5197215 -1.4110567 1.6198313
-1.5192708 -1.4056066 1.6149233
-1.5113430 -1.3533971 1.5773478
-1.5083361 -1.2936191 1.5417129
-1.5129708 -1.3670027 1.5856646
-1.5137717 -1.3743374 1.5901115
-1.5212117 -1.4145199 1.6202076
-1.5092084 -1.2964741 1.5414424
-1.5225174 -1.4173500 1.6201257
-1.5135106 -1.3569837 1.5760073
-1.5151373 -1.3713921 1.5851694
-1.5157261 -1.3778150 1.5892061
-1.5117444 -1.2951943 1.5372082
-1.5155032 -1.3614325 1.5754370
-1.5190333 -1.3786857 1.5839132
-1.5197137 -1.3858398 1.5885415
-1.5216568 -1.3891963 1.5877412
-1.5209778 -1.3821641 1.5830018
-1.5237116 -1.3930895 1.5873450
-1.5198299 -1.3587336 1.5632457
-1.5254625 -1.3962126 1.5867644
-1.5249323 -1.3902081 1.5823210
-1.5218524 -1.3632696 1.5625918
-1.5222633 -1.3697714 1.5665335
-1.5272161 -1.3999097 1.5868673
-1.5225682 -1.3611879 1.5599060
-1.5268801 -1.3935592 1.5815207
-1.5240096 -1.3637833 1.5591407
-1.5247766 -1.3744113 1.5654716
-1.5289191 -1.3974620 1.5811187
-1.5250862 -1.3634222 1.5566935
-1.5306913 -1.4005745 1.5805489
-1.5275078 -1.3680690 1.5556058
-1.5324322 -1.4042783 1.5806451
-1.5365488 -1.4294218 1.5988572
-1.5353329 -1.4220428 1.5918536
-1.5300078 -1.3787721 1.5592576
-1.5386183 -1.4324268 1.5980455
-1.5370735 -1.4246662 1.5914288
-1.5386616 -1.4280036 1.5921553
-1.5374453 -1.4204732 1.5852926
-1.5291617 -1.3456727 1.5340311
-1.5283021 -1.2920676 1.5043770
-1.5282455 -1.3019262 1.5096413
-1.5279605 -1.3123742 1.5147985
-1.5311520 -1.3703379 1.5494656
-1.5400615 -1.4305044 1.5921163
-1.5394403 -1.4239350 1.5853827
-1.5306306 -1.3541956 1.5370643
-1.5416494 -1.4338548 1.5925880
-1.5329221 -1.3749403 1.5486995
-1.5299822 -1.3159534 1.5131324
-1.5410604 -1.4265835 1.5851856
-1.5315856 -1.3503462 1.5329108
-1.5311538 -1.2954679 1.5015605
-1.5320024 -1.3460991 1.5294775
-1.5435871 -1.4369327 1.5917173
-1.5312132 -1.3054529 1.5064949
-1.5426707 -1.4298907 1.5856950
-1.5318058 -1.2980081 1.5018389
-1.5312125 -1.3183899 1.5121043
-1.5336455 -1.3584949 1.5347337
-1.5350633 -1.3786834 1.5471978
-1.5441189 -1.4325856 1.5857148
-1.5333749 -1.3063174 1.5033642
-1.5364618 -1.3754140 1.5438281
-1.5415952 -1.4181906 1.5726973
-1.5434736 -1.4259288 1.5790651
-1.5344550 -1.3500365 1.5278249
-1.5341099 -1.2968016 1.4974628
-1.5336230 -1.3171467 1.5077911
-1.5459137 -1.4360514 1.5858134
-1.5341802 -1.3119364 1.5046066
-1.5339595 -1.3196589 1.5084160
-1.5359259 -1.3585322 1.5308876
-1.5431236 -1.4207662 1.5725729
-1.5450088 -1.4285203 1.5789287
-1.5349309 -1.2993984 1.4974223
-1.5466091 -1.4317808 1.5794835
-1.5368926 -1.3546778 1.5267413
-1.5480501 -1.4393854 1.5849520
-1.5359728 -1.3143319 1.5028621
-1.5363294 -1.3121070 1.5012948
-1.5480765 -1.4343435 1.5793814
-1.5495578 -1.4426928 1.5854710
-1.5369268 -1.3024036 1.4955574
-1.5364678 -1.3227440 1.5059052
-1.5383808 -1.3631937 1.5297857
-1.5420906 -1.4027515 1.5551991
-1.5372162 -1.3184042 1.5026825
-1.5469116 -1.4225060 1.5665189
-1.5443190 -1.4065754 1.5548974
-1.5393675 -1.3177333 1.4989659
-1.5461450 -1.4098225 1.5541771
-1.5491281 -1.4262315 1.5663427
-1.5532628 -1.4445588 1.5793023
-1.5454574 -1.3990775 1.5441906
-1.5481522 -1.4136057 1.5539143
-1.5474410 -1.4078411 1.5495967
-1.5548566 -1.4471192 1.5791868
-1.5423484 -1.3235172 1.4969146
-1.5471307 -1.4021216 1.5436195
-1.5541309 -1.4413297 1.5719859
-1.5498251 -1.4174904 1.5541853
-1.5508093 -1.4252752 1.5595115
-1.5492949 -1.4108560 1.5487610
-1.5490958 -1.4058222 1.5437774
-1.5556377 -1.4439492 1.5718220
-1.5531040 -1.4289980 1.5593181
-1.5510600 -1.4147383 1.5490356
-1.5572414 -1.4472605 1.5723395
-1.5549128 -1.4327767 1.5593984
-1.5587103 -1.4498900 1.5721726
-1.5511530 -1.4051253 1.5389237
-1.5530845 -1.4179191 1.5480369
-1.5573657 -1.4425820 1.5651171
-1.5500334 -1.3925184 1.5281511
-1.5565211 -1.4358056 1.5588409
-1.5586351 -1.4456996 1.5660749
-1.5550925 -1.4221584 1.5476725
-1.5568039 -1.4307278 1.5532690
-1.5599980 -1.4482317 1.5660114
-1.5538637 -1.4081154 1.5365959
-1.5513808 -1.3895795 1.5231998
-1.5503631 -1.3769726 1.5136575
-1.5525772 -1.3963783 1.5265654
-1.5584777 -1.4334746 1.5529857
-1.5618603 -1.4515677 1.5664722
-1.5597201 -1.4373229 1.5532946
-1.5539559 -1.3941955 1.5221708
-1.5637404 -1.4543592 1.5658814
-1.5527522 -1.3813432 1.5128606
-1.5617190 -1.4401829 1.5526110
-1.5558461 -1.3972672 1.5212538
-1.5603140 -1.4266521 1.5413265
-1.5548125 -1.3857627 1.5123281
-1.5572924 -1.4010918 1.5216119
-1.5554875 -1.3840550 1.5099265
-1.5558318 -1.3819970 1.5081109
-1.5570173 -1.3944065 1.5162135
-1.5564311 -1.3867095 1.5101777
-1.5627203 -1.4308980 1.5406621
-1.5665639 -1.4553863 1.5581762
-1.5590458 -1.3986183 1.5158849
-1.5684536 -1.4586916 1.5584317
-1.5580792 -1.3857756 1.5065817
-1.5698316 -1.4613238 1.5585048
-1.5579332 -1.3340983 1.4735288
-1.5602061 -1.3904053 1.5058423
-1.5596543 -1.3226787 1.4645494
-1.5597238 -1.3324993 1.4698893
-1.5624335 -1.3949244 1.5048883
-1.5632817 -1.4012410 1.5090399
-1.5725666 -1.4608488 1.5519486
-1.5604017 -1.3390928 1.4708952
-1.5738752 -1.4633170 1.5519487
-1.5716196 -1.4544105 1.5440534
-1.5665078 -1.4186217 1.5173741
-1.5671433 -1.4245969 1.5214586
-1.5752502 -1.4665237 1.5528154
-1.5654716 -1.4057018 1.5081444
-1.5623771 -1.3381461 1.4678852
-1.5700558 -1.4415909 1.5321338
-1.5713856 -1.4499933 1.5381845
-1.5732979 -1.4577111 1.5445672
-1.5631318 -1.3286263 1.4619984
-1.5629039 -1.3437181 1.4698198
-1.5688196 -1.4278368 1.5210886
-1.5681957 -1.4217367 1.5168040
-1.5717135 -1.4448984 1.5326325
-1.5728532 -1.4526234 1.5380171
-1.5675968 -1.4101932 1.5075404
-1.5706311 -1.4317511 1.5210487
-1.5699232 -1.4254819 1.5168554
-1.5746550 -1.4559263 1.5385162
-1.5659229 -1.3279956 1.4584316
-1.5657588 -1.3430668 1.4662952
-1.5680691 -1.4057890 1.5026132
-1.5680864 -1.4001824 1.4978709
-1.5763254 -1.4587189 1.5381811
-1.5718116 -1.4285606 1.5159382
-1.5726158 -1.4356558 1.5206296
-1.5700356 -1.4100304 1.5022508
-1.5716825 -1.4230092 1.5111301
-1.5781450 -1.4621832 1.5382691
-1.5700563 -1.4044225 1.4975122
-1.5755403 -1.4466132 1.5265979
-1.5767648 -1.4542773 1.5320380
-1.5738909 -1.4326950 1.5156895
-1.5796308 -1.4650892 1.5381294
-1.5736564 -1.4263120 1.5103847
-1.5783251 -1.4576187 1.5325115
-1.5721464 -1.4142093 1.5019584
-1.5761030 -1.4424810 1.5201483
-1.5774457 -1.4496922 1.5257024
-1.5759039 -1.4367565 1.5155086
-1.5812522 -1.4685153 1.5385209
-1.5797817 -1.4602665 1.5323281
-1.5757215 -1.4302414 1.5099486
-1.5777423 -1.4454081 1.5196909
-1.5731687 -1.4046060 1.4915821
-1.5825556 -1.4712829 1.5382299
-1.5814798 -1.4636588 1.5327467
-1.5779688 -1.4399598 1.5144775
-1.5793723 -1.4491447 1.5198181
-1.5831132 -1.4664692 1.5323985
-1.5750818 -1.4088701 1.4911953
-1.5811263 -1.4522296 1.5192056
-1.5848724 -1.4701060 1.5326152
-1.5814279 -1.4467980 1.5139806
-1.5829962 -1.4560181 1.5192847
-1.5868107 -1.4737466 1.5327820
-1.5831528 -1.4504270 1.5141531
-1.5848285 -1.4590472 1.5184310
-1.5885906 -1.4767256 1.5320144
-1.5846238 -1.4535202 1.5135901
-1.5881015 -1.4704910 1.5252249
-1.5866033 -1.4628172 1.5184759
-1.5908920 -1.4807769 1.5317858
-1.5864324 -1.4572323 1.5136835
-1.5821593 -1.4267380 1.4916744
-1.5788718 -1.3794029 1.4620155
-1.5898204 -1.4733236 1.5248457
-1.5883821 -1.4656995 1.5181022
-1.5879947 -1.4602709 1.5131729
-1.5801058 -1.3872980 1.4643548
-1.5901893 -1.4691663 1.5184400
-1.5798594 -1.3569436 1.4462244
-1.5897892 -1.4638195 1.5134304
-1.5804009 -1.3625036 1.4481697
-1.5868236 -1.4484082 1.5016308
-1.5811734 -1.3844384 1.4605992
-1.5916929 -1.4723469 1.5190703
-1.5816670 -1.3798687 1.4574066
-1.5819485 -1.3915898 1.4639298
-1.5858787 -1.4289622 1.4868665
-1.5882812 -1.4510258 1.5014760
-1.5915360 -1.4666546 1.5130570
-1.5953317 -1.4848502 1.5261551
-1.5822944 -1.3591594 1.4434598
-1.5941531 -1.4776548 1.5200516
-1.5826413 -1.3623282 1.4445498
-1.5835097 -1.3885918 1.4591046
-1.5829938 -1.3676995 1.4466484
-1.5837468 -1.3840383 1.4558500
-1.5933587 -1.4701612 1.5130872
-1.5877411 -1.4332472 1.4864541
-1.5883517 -1.4404306 1.4910478
-1.5959021 -1.4805958 1.5195714
-1.5949352 -1.4737636 1.5136133
-1.5852653 -1.3924299 1.4586302
-1.5903818 -1.4494713 1.4949099
-1.5901585 -1.4437677 1.4902452
-1.5859118 -1.4050796 1.4643398
-1.5977973 -1.4844886 1.5197838
-1.5860692 -1.3888340 1.4546896
-1.5854676 -1.3674112 1.4426171
-1.5919662 -1.4527720 1.4954158
-1.5965453 -1.4765066 1.5133301
-1.5857299 -1.3616578 1.4393463
-1.5855736 -1.3727893 1.4450961
-1.5882818 -1.4183784 1.4726114
-1.5860617 -1.3641354 1.4400682
-1.5871372 -1.3959668 1.4576911
-1.5921415 -1.4476194 1.4899115
-1.5980643 -1.4799017 1.5137559
-1.5935764 -1.4553543 1.4952910
-1.5990766 -1.4838957 1.5159108
-1.5901573 -1.4226582 1.4722054
-1.5890567 -1.4096821 1.4630275
-1.5879906 -1.3667490 1.4383034
-1.5886751 -1.3937159 1.4533835
-1.6007295 -1.4902109 1.5190097
-1.5937876 -1.4507647 1.4895803
-1.5995537 -1.4826478 1.5134763
-1.5880841 -1.3717130 1.4406317
-1.5925715 -1.4389855 1.4805520
-1.5932999 -1.4449240 1.4847004
-1.5898156 -1.3275429 1.4175765
-1.6012114 -1.4855687 1.5130200
-1.5955920 -1.4543393 1.4895271
-1.5908676 -1.3311821 1.4176195
-1.5931122 -1.4337887 1.4751017
-1.5949094 -1.4480936 1.4843571
-1.5914453 -1.4143586 1.4619181
-1.5903209 -1.3767477 1.4396439
-1.5945611 -1.4424488 1.4796466
-1.5904882 -1.3717282 1.4368498
-1.5971704 -1.4571225 1.4892115
-1.5920690 -1.4104414 1.4581644
-1.6030638 -1.4893280 1.5131150
-1.5920904 -1.3305496 1.4153942
-1.5948205 -1.4373759 1.4740637
-1.5968752 -1.4518702 1.4841007
-1.5934656 -1.4181786 1.4606737
-1.5941571 -1.4148521 1.4576472
-1.5986783 -1.4550739 1.4834176
-1.6061432 -1.4952711 1.5134473
-1.5951663 -1.4225875 1.4601231
-1.5982760 -1.4455947 1.4748125
-1.6006216 -1.4587650 1.4832590
-1.5961101 -1.4185215 1.4562024
-1.5982805 -1.4381759 1.4688545
-1.5993117 -1.4450465 1.4721359
-1.6057661 -1.4854983 1.4996738
-1.5979657 -1.4229329 1.4556612
-1.6002106 -1.4424328 1.4684768
-1.6049555 -1.4779030 1.4928562
-1.5979000 -1.4167073 1.4502218
-1.6012261 -1.4493108 1.4717509
-1.6076681 -1.4884117 1.4989444
-1.6048852 -1.4730249 1.4871246
-1.6068053 -1.4807182 1.4922309
-1.5997457 -1.4265943 1.4545549
-1.6093537 -1.4921159 1.4993781
-1.6030688 -1.4536061 1.4713309
-1.5999027 -1.4212495 1.4495655
-1.6066987 -1.4759396 1.4866664
-1.6085439 -1.4842910 1.4924760
-1.6055374 -1.4632246 1.4759515
-1.6111100 -1.4950305 1.4989275
-1.6085114 -1.4795157 1.4869298
-1.6050011 -1.4571145 1.4703644
-1.6007332 -1.3976241 1.4320010
-1.6020058 -1.4257428 1.4486219
-1.6073010 -1.4662482 1.4751148
-1.6115434 -1.4902756 1.4927674
-1.6128863 -1.4986675 1.4988270
-1.6102086 -1.4822400 1.4864041
-1.6029673 -1.4218941 1.4444827
-1.6041184 -1.4355236 1.4530779
-1.6062184 -1.4542114 1.4653714
-1.6095803 -1.4769593 1.4816061
-1.6129164 -1.4929664 1.4928158
-1.6052996 -1.4423298 1.4564352
-1.6089798 -1.4700658 1.4754422
-1.6120659 -1.4858080 1.4866490
-1.6029844 -1.3905377 1.4244158
-1.6112470 -1.4799533 1.4810815
-1.6144391 -1.4964688 1.4931736
-1.6079791 -1.4582427 1.4651474
-1.6047986 -1.4261658 1.4440809
-1.6036969 -1.4026844 1.4301597
-1.6066402 -1.4393937 1.4514849
-1.6073464 -1.4465346 1.4561210
-1.6137546 -1.4886627 1.4862538
-1.6130504 -1.4836644 1.4812160
-1.6104301 -1.4677457 1.4695852
-1.6161180 -1.4994208 1.4926863
-1.6100037 -1.4622860 1.4649739
-1.6068039 -1.4296520 1.4431697
-1.6058394 -1.3961226 1.4225277
-1.6121787 -1.4707540 1.4690501
-1.6148704 -1.4866246 1.4804613
-1.6065944 -1.4030849 1.4256456
-1.6179597 -1.5031128 1.4925513
-1.6121423 -1.4656931 1.4638034
-1.6112767 -1.4594220 1.4596319
-1.6075149 -1.3945647 1.4188252
-1.6099785 -1.4402530 1.4461984
-1.6106418 -1.4474110 1.4508162
-1.6139463 -1.4745563 1.4691094
-1.6195060 -1.5060707 1.4923513
-1.6082440 -1.4067039 1.4245821
-1.6131903 -1.4626268 1.4589109
-1.6210971 -1.5094126 1.4928278
-1.6120068 -1.4444647 1.4458780
-1.6124999 -1.4509303 1.4498647
-1.6098473 -1.3992602 1.4176610
-1.6151136 -1.4666340 1.4584724
-1.6121768 -1.3375835 1.3840495
-1.6107275 -1.4057718 1.4187696
-1.6222065 -1.5056985 1.4856917
-1.6233410 -1.5081249 1.4859921
-1.6132321 -1.3435260 1.3852606
-1.6219976 -1.5004679 1.4792588
-1.6125507 -1.4048982 1.4156898
-1.6210781 -1.4937320 1.4729498
-1.6247134 -1.5112527 1.4866895
-1.6236071 -1.5038037 1.4797427
-1.6227047 -1.4970326 1.4734668
-1.6261171 -1.5138991 1.4865127
-1.6154378 -1.3435874 1.3813708
-1.6241620 -1.4996753 1.4732890
-1.6162892 -1.3501386 1.3824688
-1.6181813 -1.4580162 1.4424011
-1.6196293 -1.4703073 1.4506305
-1.6266836 -1.5097507 1.4800768
-1.6157714 -1.4109301 1.4130023
-1.6280743 -1.5124217 1.4798772
-1.6171437 -1.4350745 1.4251506
-1.6215641 -1.4742776 1.4505285
-1.6180333 -1.3485482 1.3788055
-1.6194378 -1.4551179 1.4374029
-1.6272030 -1.5056407 1.4736084
-1.6203910 -1.4617306 1.4409341
-1.6295578 -1.5157391 1.4803880
-1.6170458 -1.4085333 1.4079889
-1.6233560 -1.4826269 1.4550126
-1.6262791 -1.4989058 1.4672998
-1.6253237 -1.4913937 1.4604065
-1.6287672 -1.5089989 1.4740737
-1.6192088 -1.3548883 1.3792868
-1.6193768 -1.3524818 1.3780354
-1.6234756 -1.4773978 1.4495854
-1.6181139 -1.3994676 1.4012572
-1.6196392 -1.4393134 1.4243840
-1.6277274 -1.5015525 1.4671186
-1.6252084 -1.4863101 1.4548499
-1.6200534 -1.4350673 1.4209507
-1.6214545 -1.4532968 1.4323524
-1.6220057 -1.4597372 1.4363683
-1.6227427 -1.4660946 1.4404737
-1.6303491 -1.5119346 1.4738834
-1.6269460 -1.4948282 1.4607893
-1.6194093 -1.4131896 1.4068743
-1.6292984 -1.5048836 1.4676097
-1.6252746 -1.4811487 1.4496465
-1.6267557 -1.4892824 1.4546809
-1.6248272 -1.4754587 1.4449587
-1.6285347 -1.4976653 1.4604191
-1.6214403 -1.3552378 1.3755611
-1.6212258 -1.3598047 1.3778030
-1.6209083 -1.3693215 1.3817998
-1.6233864 -1.4567844 1.4314330
-1.6238662 -1.4628196 1.4354368
-1.6309215 -1.5077922 1.4674389
-1.6323454 -1.5157660 1.4736163
-1.6220894 -1.4395711 1.4203395
-1.6268835 -1.4841261 1.4491906
-1.6208951 -1.3802192 1.3860680
-1.6209884 -1.4050506 1.3993806
-1.6209239 -1.4117131 1.4030567
-1.6213886 -1.4213994 1.4086182
-1.6284246 -1.4928351 1.4549374
-1.6265557 -1.4785468 1.4444002
-1.6302648 -1.5012260 1.4607022
-1.6218110 -1.4171532 1.4051839
-1.6247211 -1.4602240 1.4317568
-1.6324885 -1.5111498 1.4679059
-1.6227194 -1.3628470 1.3764460
-1.6257708 -1.4669427 1.4351925
-1.6284973 -1.4877205 1.4494049
-1.6300687 -1.4956412 1.4545942
-1.6319149 -1.5040232 1.4603635
-1.6237641 -1.3602905 1.3737724
-1.6282580 -1.4822999 1.4444576
-1.6228957 -1.4041453 1.3963365
-1.6242580 -1.4433058 1.4188487
-1.6353685 -1.5221228 1.4738424
-1.6235630 -1.3749685 1.3797972
-1.6235631 -1.4214752 1.4047120
-1.6301852 -1.4906367 1.4489600
-1.6243941 -1.3639129 1.3741378
-1.6236602 -1.4168581 1.4016064
-1.6317844 -1.4991277 1.4546517
-1.6278461 -1.4712108 1.4348117
-1.6335746 -1.5074348 1.4607711
-1.6237354 -1.3858131 1.3841855
-1.6265010 -1.4577394 1.4260468
-1.6272692 -1.4640840 1.4301690
-1.6353723 -1.5171973 1.4681566
-1.6367466 -1.5247971 1.4736368
-1.6299010 -1.4853209 1.4439105
-1.6255706 -1.3579377 1.3698618
-1.6317092 -1.4942430 1.4494981
-1.6349290 -1.5099885 1.4606844
-1.6253020 -1.3740961 1.3766367
-1.6333549 -1.5019095 1.4543387
-1.6259417 -1.3690344 1.3735447
-1.6316245 -1.4890443 1.4440482
-1.6258902 -1.4261768 1.4035454
-1.6284881 -1.4619704 1.4256977
-1.6305697 -1.4806653 1.4379804
-1.6373597 -1.5202435 1.4673077
-1.6297912 -1.4747788 1.4337970
-1.6362474 -1.5130604 1.4614390
-1.6333955 -1.4970521 1.4488689
-1.6349492 -1.5054155 1.4549430
-1.6262066 -1.3852820 1.3804073
-1.6261766 -1.4101577 1.3936661
-1.6262749 -1.4219423 1.4000918
-1.6282211 -1.4557161 1.4202637
-1.6390030 -1.5239366 1.4677223
-1.6377928 -1.5157203 1.4612376
-1.6279308 -1.3680317 1.3699591
-1.6364727 -1.5081153 1.4547043
-1.6290700 -1.3497638 1.3614389
-1.6282122 -1.3635911 1.3678488
-1.6273947 -1.4185211 1.3960293
-1.6325799 -1.4848839 1.4376384
-1.6309227 -1.4714893 1.4287925
-1.6351362 -1.5006207 1.4491147
-1.6300928 -1.4598517 1.4199996
-1.6280699 -1.3797195 1.3747022
-1.6284216 -1.3715014 1.3705331
-1.6405460 -1.5265430 1.4675694
-1.6287486 -1.3753111 1.3715414
-1.6380218 -1.5115029 1.4551421
-1.6288747 -1.4317158 1.4017248
-1.6328812 -1.4757268 1.4284335
-1.6300901 -1.3619695 1.3642647
-1.6291210 -1.3908551 1.3785708
-1.6301144 -1.4503177 1.4114761
-1.6372211 -1.5047176 1.4488762
-1.6421074 -1.5291228 1.4672007
-1.6318148 -1.4630920 1.4192953
-1.6394813 -1.5141462 1.4549631
-1.6300917 -1.4235371 1.3941955
-1.6309825 -1.3739095 1.3673408
-1.6389569 -1.5077159 1.4480799
-1.6410561 -1.5174140 1.4555149
-1.6311798 -1.4356847 1.4000118
-1.6335038 -1.4668581 1.4193333
-1.6348620 -1.4799610 1.4280791
-1.6355171 -1.4859219 1.4321904
-1.6322944 -1.4540449 1.4099887
-1.6331673 -1.4609700 1.4144661
-1.6316433 -1.3807784 1.3693298
-1.6404441 -1.5114332 1.4484936
-1.6339012 -1.3544256 1.3565474
-1.6326091 -1.3676527 1.3621750
-1.6317252 -1.4115446 1.3844969
-1.6440504 -1.5283958 1.4614309
-1.6323537 -1.4265590 1.3919979
-1.6322279 -1.4020967 1.3784560
-1.6367857 -1.4834506 1.4271356
-1.6374853 -1.4893918 1.4312689
-1.6329503 -1.3783223 1.3660218
-1.6351485 -1.4650613 1.4142548
-1.6334840 -1.3741924 1.3633037
-1.6328765 -1.4241085 1.3894749
-1.6345300 -1.4584586 1.4094698
-1.6420444 -1.5142177 1.4481726
-1.6455772 -1.5309935 1.4612878
-1.6338403 -1.4361691 1.3953659
-1.6346491 -1.4551038 1.4064363
-1.6335055 -1.4147058 1.3830936
-1.6342603 -1.3861167 1.3675100
-1.6422981 -1.5091555 1.4425943
-1.6369327 -1.4682733 1.4135818
-1.6345611 -1.4171406 1.3825974
-1.6392594 -1.4881106 1.4260591
-1.6351924 -1.4283186 1.3879224
-1.6350691 -1.4076916 1.3765620
-1.6355489 -1.4456750 1.3975155
-1.6438564 -1.5127045 1.4428644
-1.6369548 -1.4587806 1.4050136
-1.6362504 -1.3798124 1.3613710
-1.6362873 -1.4400883 1.3937303
-1.6386761 -1.4720188 1.4136458
-1.6366049 -1.3854280 1.3631979
-1.6453797 -1.5157027 1.4426469
-1.6370485 -1.3910188 1.3650786
-1.6367796 -1.4061177 1.3728782
-1.6366525 -1.4159965 1.3781065
-1.6372915 -1.4492607 1.3965015
-1.6369431 -1.4188047 1.3791361
-1.6376546 -1.4332208 1.3866703
-1.6391849 -1.4631954 1.4044944
-1.6416755 -1.4887376 1.4213266
-1.6426528 -1.4949768 1.4255256
-1.6387515 -1.3792577 1.3576211
-1.6473109 -1.5193482 1.4425514
-1.6380773 -1.4086229 1.3719378
-1.6443786 -1.4980171 1.4246613
-1.6392694 -1.3910769 1.3611970
-1.6437125 -1.4921682 1.4204302
-1.6513661 -1.5380107 1.4538916
-1.6394029 -1.4216191 1.3761588
-1.6401744 -1.4496693 1.3919765
-1.6398748 -1.3968464 1.3629268
-1.6401546 -1.4120976 1.3702627
-1.6458078 -1.5019574 1.4248837
-1.6403343 -1.3946919 1.3609078
-1.6421160 -1.3852374 1.3549933
-1.6454733 -1.4908912 1.4152167
-1.6427284 -1.4542902 1.3909346
-1.6421530 -1.4225915 1.3715714
-1.6479443 -1.5000875 1.4199015
-1.6424784 -1.3972278 1.3583476
-1.6428086 -1.4025006 1.3605534
-1.6511500 -1.5224366 1.4339341
-1.6434467 -1.4008592 1.3584334
-1.6475327 -1.4949702 1.4133856
-1.6496686 -1.5031088 1.4193551
-1.6529187 -1.5256611 1.4345087
-1.6464603 -1.4764749 1.4006316
-1.6574653 -1.5434215 1.4477071
-1.6445577 -1.4254170 1.3688123
-1.6513258 -1.5069621 1.4193636
-1.6543644 -1.5283101 1.4343266
-1.6452173 -1.4283562 1.3690958
-1.6455897 -1.4035535 1.3558439
-1.6457800 -1.4082860 1.3584777
-1.6482660 -1.4801301 1.3995375
-1.6495928 -1.3572459 1.3332107
-1.6465532 -1.4072858 1.3560571
-1.6511571 -1.4957029 1.4082629
-1.6501601 -1.4845337 1.3990083
-1.6475944 -1.4317615 1.3666576
-1.6512350 -1.3570180 1.3309576
-1.6478028 -1.4273609 1.3645612
-1.6485313 -1.4613279 1.3835381
-1.6566782 -1.5274372 1.4284206
-1.6485348 -1.4139067 1.3565240
-1.6480766 -1.4342512 1.3668883
-1.6499324 -1.4727460 1.3896746
-1.6530392 -1.4999797 1.4078602
-1.6583680 -1.5307074 1.4289683
-1.6486111 -1.4097721 1.3529278
-1.6513900 -1.4809576 1.3942648
-1.6492652 -1.4302728 1.3635761
-1.6524510 -1.4888506 1.3982521
-1.6528768 -1.3607327 1.3293646
-1.6516428 -1.4758649 1.3891033
-1.6508111 -1.4653047 1.3818115
-1.6598474 -1.5333383 1.4287986
-1.6533366 -1.4851884 1.3939143
-1.6505374 -1.4329907 1.3626064
-1.6532028 -1.4796690 1.3890834
-1.6544932 -1.4926493 1.3970286
-1.6547422 -1.3640202 1.3273989
-1.6513108 -1.4146795 1.3503853
-1.6515844 -1.4199988 1.3537652
-1.6598757 -1.5298620 1.4220300
-1.6528855 -1.3881279 1.3364780
-1.6571993 -1.5082347 1.4057297
-1.6550514 -1.4888163 1.3928405
-1.6522661 -1.4173356 1.3500961
-1.6616084 -1.5331077 1.4225914
-1.6537435 -1.4656959 1.3773131
-1.6545145 -1.4767501 1.3841085
-1.6644518 -1.5478612 1.4336822
-1.6566780 -1.4969601 1.3962717
-1.6532489 -1.4386274 1.3606368
-1.6589001 -1.5120681 1.4057588
-1.6631086 -1.5357266 1.4224304
-1.6661874 -1.5511307 1.4342193
-1.6570038 -1.4930788 1.3924582
-1.6562349 -1.4801815 1.3832279
-1.6565488 -1.3736616 1.3265128
-1.6541471 -1.4202692 1.3484694
-1.6543793 -1.4248683 1.3512686
-1.6651304 -1.5444733 1.4278588
-1.6554147 -1.3914509 1.3337393
-1.6563161 -1.4703121 1.3762816
-1.6605247 -1.5151356 1.4051651
-1.6665916 -1.5471124 1.4276835
-1.6589707 -1.4973695 1.3920472
-1.6564103 -1.3945362 1.3334388
-1.6580393 -1.4841917 1.3826756
-1.6593661 -1.4921512 1.3866096
-1.6653400 -1.5348994 1.4164919
-1.6682065 -1.5504251 1.4281945
-1.6608011 -1.5045260 1.3947595
-1.6570648 -1.4299278 1.3498062
-1.6589958 -1.3775575 1.3238822
-1.6570722 -1.4253386 1.3466603
-1.6621889 -1.5127019 1.3993998
-1.6611635 -1.5007721 1.3904945
-1.6682741 -1.5458414 1.4224497
-1.6700548 -1.5544387 1.4293599
-1.6670095 -1.5377575 1.4160943
-1.6626503 -1.5078189 1.3940106
-1.6612444 -1.4955492 1.3857666
-1.6588327 -1.3981568 1.3310409
-1.6600596 -1.3806635 1.3229567
-1.6590675 -1.3938153 1.3287703
-1.6606211 -1.4892550 1.3816056
-1.6657420 -1.5300532 1.4094005
-1.6637054 -1.5158896 1.3990612
-1.6698580 -1.5486691 1.4220858
-1.6596930 -1.3966255 1.3289668
-1.6589936 -1.4304258 1.3461164
-1.6632711 -1.5049979 1.3901616
-1.6673351 -1.5333787 1.4098934
-1.6617767 -1.3780229 1.3202963
-1.6599557 -1.4010612 1.3304183
-1.6594192 -1.4351973 1.3481493
-1.6644281 -1.5116332 1.3936840
-1.6618589 -1.4863656 1.3765953
-1.6625622 -1.4927408 1.3806794
-1.6655188 -1.5196043 1.3988369
-1.6632218 -1.4995761 1.3852244
-1.6712851 -1.5512853 1.4219346
-1.6626505 -1.3813138 1.3196489
-1.6688889 -1.5361053 1.4096297
-1.6659181 -1.5154257 1.3940633
-1.6652243 -1.5084886 1.3892244
-1.6727635 -1.5544323 1.4226121
-1.6610801 -1.4354206 1.3449172
-1.6621093 -1.3995823 1.3262763
-1.6651568 -1.3648875 1.3107027
-1.6638086 -1.4906141 1.3762259
-1.6644023 -1.4965958 1.3802987
-1.6651362 -1.5029570 1.3843986
-1.6689298 -1.5321972 1.4045825
-1.6705983 -1.5396195 1.4099357
-1.6673817 -1.5182819 1.3936726
-1.6671047 -1.5125704 1.3890140
-1.6624586 -1.4366163 1.3426915
-1.6624017 -1.4418153 1.3453070
-1.6633138 -1.4744763 1.3638522
-1.6733106 -1.5503057 1.4161535
-1.6658998 -1.4998372 1.3799202
-1.6706544 -1.5350412 1.4041972
-1.6722462 -1.5424753 1.4095676
-1.6652908 -1.3850243 1.3167425
-1.6643777 -1.4813327 1.3671459
-1.6656468 -1.4944674 1.3758416
-1.6748182 -1.5536983 1.4165901
-1.6674623 -1.3682965 1.3079530
-1.6723131 -1.5385047 1.4045546
-1.6739290 -1.5459220 1.4099385
-1.6689450 -1.5157588 1.3879934
-1.6651758 -1.4787334 1.3634670
-1.6680115 -1.3652875 1.3061560
-1.6650245 -1.4054643 1.3241051
-1.6639604 -1.4553070 1.3494970
-1.6644110 -1.4664859 1.3561152
-1.6677714 -1.5036736 1.3795624
-1.6664127 -1.4855451 1.3668220
-1.6668744 -1.4915841 1.3708219
-1.6675662 -1.4979642 1.3749058
-1.6708235 -1.5251278 1.3931642
-1.6752669 -1.5485141 1.4098145
-1.6738567 -1.5412244 1.4042973
-1.6649464 -1.4457462 1.3425582
-1.6685898 -1.3718316 1.3071806
-1.6650985 -1.4376126 1.3380248
-1.6650645 -1.4415599 1.3401283
-1.6654254 -1.4630822 1.3519995
-1.6769353 -1.5570498 1.4157155
-1.6706264 -1.5196943 1.3882332
-1.6671493 -1.4822387 1.3625441
-1.6695928 -1.5070155 1.3787707
-1.6764070 -1.5516995 1.4107246
-1.6658681 -1.4597869 1.3488885
-1.6696645 -1.3691862 1.3046914
-1.6727569 -1.5290933 1.3930602
-1.6667537 -1.4713935 1.3552258
-1.6689178 -1.4950267 1.3699531
-1.6739342 -1.5358815 1.3976997
-1.6754185 -1.5438457 1.4038713
-1.6788291 -1.5607800 1.4158211
-1.6678490 -1.4785008 1.3582633
-1.6724219 -1.5227317 1.3873670
-1.6673448 -1.4674045 1.3515564
-1.6769763 -1.5473309 1.4044987
-1.6689974 -1.4860827 1.3621430
-1.6711168 -1.3720792 1.3032121
-1.6757015 -1.5394695 1.3979291
-1.6746903 -1.5321287 1.3922044
-1.6680711 -1.4634319 1.3474941
-1.6677572 -1.4418763 1.3356461
-1.6678271 -1.4380633 1.3334106
-1.6678872 -1.4471592 1.3382269
-1.6691850 -1.4760280 1.3541530
-1.6784821 -1.5501227 1.4041762
-1.6685324 -1.4593188 1.3439297
-1.6713942 -1.4996845 1.3688732
-1.6800059 -1.5584595 1.4102765
-1.6772463 -1.5422754 1.3976192
-1.6719554 -1.3786028 1.3038253
-1.6700839 -1.4828508 1.3573826
-1.6695402 -1.4718506 1.3505445
-1.6763862 -1.5357711 1.3923775
-1.6813125 -1.5610249 1.4101806
-1.6799884 -1.5535215 1.4046003
-1.6703597 -1.4069212 1.3148133
-1.6714839 -1.4899738 1.3605251
-1.6748244 -1.5218166 1.3815041
-1.6701436 -1.4679371 1.3468881
-1.6700533 -1.4568382 1.3398652
-1.6700575 -1.4470263 1.3345395
-1.6700953 -1.4419243 1.3318066
-1.6731593 -1.5039887 1.3684306
-1.6747142 -1.3644004 1.2955576
-1.6701452 -1.4518727 1.3370075
-1.6764486 -1.5299710 1.3861832
-1.6714333 -1.4799675 1.3528397
-1.6705960 -1.4638327 1.3433144
-1.6826234 -1.5640436 1.4109867
-1.6762273 -1.5254443 1.3820282
-1.6711724 -1.4181250 1.3185272
-1.6722322 -1.4874228 1.3567912
-1.6813653 -1.5562001 1.4043948
-1.6715930 -1.4755319 1.3494789
-1.6743580 -1.3786140 1.3000728
-1.6793598 -1.5421196 1.3926388
-1.6840875 -1.5667242 1.4107732
-1.6782413 -1.5337777 1.3862370
-1.6723823 -1.4724651 1.3458908
-1.6777180 -1.5282546 1.3816851
-1.6750105 -1.5075612 1.3674274
-1.6721290 -1.4614881 1.3391080
-1.6720789 -1.4556577 1.3358410
-1.6731584 -1.4794905 1.3493547
-1.6750696 -1.3853496 1.3009413
-1.6754856 -1.3816930 1.2992556
-1.6724076 -1.4467335 1.3304960
-1.6730605 -1.4125602 1.3128377
-1.6725336 -1.4420351 1.3279276
-1.6736595 -1.4844637 1.3518823
-1.6728311 -1.4682797 1.3423965
-1.6724990 -1.4519442 1.3331462
-1.6858428 -1.5701661 1.4111643
-1.6798867 -1.5373684 1.3864586
-1.6731507 -1.4377262 1.3246269
-1.6758317 -1.5037473 1.3632329
-1.6844446 -1.5625290 1.4046426
-1.6738068 -1.4234812 1.3168428
-1.6778708 -1.3683769 1.2919764
-1.6768121 -1.5118503 1.3670022
-1.6774937 -1.5180545 1.3709201
-1.6740421 -1.4599964 1.3349613
-1.6813818 -1.5400846 1.3862088
-1.6767871 -1.3869258 1.2987837
-1.6859629 -1.5658937 1.4051094
-1.6782459 -1.3713992 1.2920168
-1.6743759 -1.4293375 1.3184754
-1.6743720 -1.4652754 1.3375725
-1.6792224 -1.5259044 1.3758509
-1.6751639 -1.4830727 1.3479940
-1.6748281 -1.4762449 1.3440049
-1.6751065 -1.4720987 1.3408341
-1.6747749 -1.4467365 1.3267128
-1.6758738 -1.4119220 1.3092848
-1.6811922 -1.5350838 1.3811843
-1.6776840 -1.3850669 1.2968887
-1.6779132 -1.5081736 1.3627017
-1.6751162 -1.4562578 1.3311442
-1.6828009 -1.5429363 1.3861189
-1.6799259 -1.3687646 1.2893301
-1.6758677 -1.4228259 1.3135428
-1.6754816 -1.4424185 1.3234399
-1.6795539 -1.5219939 1.3708017
-1.6874691 -1.5685150 1.4049466
-1.6809650 -1.5297154 1.3759005
-1.6762899 -1.4289460 1.3154778
-1.6759277 -1.4644974 1.3343283
-1.6826415 -1.5384868 1.3815940
-1.6782331 -1.3915749 1.2979455
-1.6803444 -1.3718392 1.2892574
-1.6890197 -1.5718590 1.4054317
-1.6767364 -1.4699639 1.3364215
-1.6772698 -1.4815870 1.3430745
-1.6774090 -1.4877103 1.3468907
-1.6777591 -1.4927433 1.3497178
-1.6844342 -1.5465593 1.3863519
-1.6767389 -1.4341922 1.3171175
-1.6799620 -1.5125138 1.3619007
-1.6807254 -1.5191064 1.3657838
-1.6781565 -1.4158988 1.3075605
-1.6826019 -1.5327796 1.3753158
-1.6873883 -1.5623154 1.3965064
-1.6771582 -1.4558962 1.3276688
-1.6772175 -1.4507627 1.3249781
-1.6777035 -1.4615583 1.3294976
-1.6905769 -1.5745762 1.4051745
-1.6785154 -1.4272009 1.3115076
-1.6890244 -1.5656186 1.3970212
-1.6784064 -1.4428107 1.3189356
-1.6807477 -1.3917087 1.2941022
-1.6788455 -1.4745324 1.3353552
-1.6826563 -1.5224882 1.3649553
-1.6791599 -1.4332882 1.3130512
-1.6789915 -1.4392444 1.3161190
-1.6789089 -1.4693030 1.3319819
-1.6795668 -1.4863026 1.3418952
-1.6801801 -1.4974157 1.3486087
-1.6820116 -1.5162225 1.3607703
-1.6879352 -1.5589942 1.3906278
-1.6810440 -1.3978905 1.2954181
-1.6834486 -1.3757648 1.2857827
-1.6906070 -1.5682446 1.3968460
-1.6796145 -1.4609712 1.3261177
-1.6860051 -1.5396447 1.3747867
-1.6894696 -1.5615933 1.3904823
-1.6845041 -1.5263724 1.3645562
-1.6810218 -1.4323928 1.3099607
-1.6806643 -1.4475287 1.3177034
-1.6805453 -1.4670213 1.3277305
-1.6923200 -1.5716363 1.3972723
-1.6826449 -1.3980721 1.2929061
-1.6810344 -1.4786319 1.3338879
-1.6855755 -1.3747873 1.2828639
-1.6821245 -1.4968317 1.3440404
-1.6875582 -1.5429964 1.3752490
-1.6911127 -1.5648896 1.3910044
-1.6814495 -1.4410101 1.3132469
-1.6817166 -1.4383844 1.3114853
-1.6814546 -1.4744091 1.3304299
-1.6821841 -1.4860636 1.3366892
-1.6857587 -1.5235817 1.3594469
-1.6865750 -1.5306727 1.3641401
-1.6926233 -1.5674771 1.3908722
-1.6911634 -1.5603995 1.3851748
-1.6822260 -1.4663156 1.3244336
-1.6840660 -1.4040971 1.2929258
-1.6831863 -1.4835201 1.3329854
-1.6942452 -1.5707902 1.3913808
-1.6846723 -1.5014566 1.3429969
-1.6885581 -1.5397395 1.3679793
-1.6928359 -1.5631779 1.3848508
-1.6876633 -1.5276765 1.3592253
-1.6839875 -1.4796148 1.3288713
-1.6843364 -1.4435690 1.3099767
-1.6844601 -1.4907858 1.3355062
-1.6885556 -1.5341367 1.3632283
-1.6855996 -1.4049436 1.2906555
-1.6957084 -1.5733515 1.3912780
-1.6876597 -1.5222458 1.3543023
-1.6902997 -1.5435521 1.3680265
-1.6946013 -1.5665394 1.3850567
-1.6848909 -1.4718463 1.3225654
-1.6855904 -1.4881522 1.3315305
-1.6870341 -1.4047528 1.2881489
-1.6971874 -1.5764829 1.3919703
-1.6873716 -1.4103396 1.2900074
-1.6917371 -1.5465762 1.3674781
-1.6896581 -1.5264710 1.3539550
-1.6947709 -1.5621492 1.3791243
-1.6962209 -1.5693177 1.3847366
-1.6983385 -1.5788950 1.3922728
-1.6865623 -1.4847988 1.3273406
-1.6885070 -1.5139228 1.3443506
-1.6916042 -1.5351227 1.3578292
-1.6933749 -1.5492421 1.3672762
-1.6979653 -1.5729481 1.3851944
-1.6962901 -1.5648032 1.3789303
-1.6879076 -1.4923557 1.3299566
-1.6891226 -1.4111422 1.2872376
-1.6904871 -1.5180013 1.3441486
-1.6936756 -1.5449293 1.3622714
-1.6993642 -1.5755982 1.3850139
-1.6980795 -1.5681481 1.3793916
-1.6889847 -1.4889766 1.3254283
-1.6935803 -1.5385883 1.3569162
-1.6903858 -1.4112949 1.2850402
-1.6951053 -1.5478941 1.3621300
-1.6907208 -1.4168381 1.2869412
-1.6925595 -1.5267504 1.3479303
-1.6903211 -1.4971742 1.3287009
-1.6912063 -1.5088147 1.3349900
-1.6925260 -1.5213180 1.3430070
-1.6905591 -1.4869691 1.3208743
-1.6967889 -1.5515238 1.3623092
-1.6911249 -1.4935385 1.3243923
-1.6930472 -1.5179447 1.3387626
-1.6945622 -1.5309749 1.3475845
-1.6925584 -1.4183287 1.2843225
-1.6944201 -1.5254792 1.3427186
-1.6931999 -1.5132617 1.3344259
-1.6926689 -1.5020359 1.3274692
-1.6926140 -1.4303910 1.2882238
-1.6988254 -1.5542786 1.3617262
-1.7028392 -1.5775039 1.3788281
-1.6936835 -1.4177345 1.2820283
-1.6930302 -1.4982502 1.3239269
-1.6949912 -1.5220524 1.3385303
-1.6941661 -1.4233908 1.2838568
-1.6963383 -1.5296700 1.3424034
-1.7045990 -1.5807586 1.3793760
-1.6953877 -1.5168445 1.3330840
-1.6933721 -1.4517930 1.2956725
-1.6932108 -1.4577503 1.2987528
-1.6938054 -1.4897992 1.3166203
-1.6940772 -1.4948700 1.3193959
-1.6949920 -1.5061718 1.3255880
-1.6954782 -1.4234264 1.2816512
-1.6956353 -1.5128813 1.3293482
-1.6969631 -1.5261058 1.3379672
-1.6952684 -1.5022174 1.3222041
-1.6982177 -1.5332155 1.3414141
-1.6962779 -1.4264423 1.2816508
-1.6957581 -1.4339917 1.2845628
-1.6957365 -1.4370019 1.2854967
-1.6974968 -1.5212445 1.3325741
-1.6970008 -1.4238540 1.2792361
-1.6955256 -1.4570504 1.2944177
-1.6953082 -1.4622950 1.2969501
-1.6989069 -1.5296150 1.3370140
-1.6972394 -1.5110488 1.3246219
-1.6978772 -1.5173872 1.3284039
-1.6974340 -1.4298487 1.2806506
-1.6976055 -1.5070828 1.3209657
-1.7057713 -1.5735547 1.3654917
-1.7025575 -1.5525893 1.3488772
-1.7095264 -1.5912859 1.3777142
-1.7008983 -1.5340055 1.3365053
-1.6979819 -1.4565256 1.2906447
-1.6978023 -1.4617587 1.2932005
-1.6984211 -1.4997037 1.3142583
-1.6994965 -1.5158884 1.3237557
-1.7000968 -1.5219804 1.3277128
-1.7073694 -1.5765031 1.3650154
-1.6998603 -1.4298648 1.2769013
-1.6995491 -1.4344415 1.2788692
-1.6992024 -1.5044353 1.3157641
-1.7110505 -1.5938648 1.3775866
-1.7044958 -1.5562381 1.3490392
-1.7000171 -1.5120249 1.3195863
-1.6996561 -1.4400997 1.2805406
-1.7089984 -1.5801100 1.3652621
-1.7030740 -1.5377307 1.3350225
-1.7005304 -1.4616572 1.2896341
-1.7005712 -1.4663109 1.2922900
-1.7022912 -1.5257840 1.3261530
-1.7043335 -1.5452715 1.3389679
-1.7057855 -1.5595349 1.3482598
-1.7017930 -1.5196843 1.3218619
-1.7106355 -1.5829162 1.3649195
-1.7015173 -1.5092667 1.3144768
-1.7021535 -1.4371652 1.2755391
-1.7023985 -1.4348445 1.2743155
-1.7023296 -1.5162355 1.3176278
-1.7123246 -1.5863110 1.3653376
-1.7108310 -1.5780042 1.3592013
-1.7141869 -1.5952371 1.3721756
-1.7062590 -1.5487839 1.3380016
-1.7027007 -1.4405894 1.2759708
-1.7037414 -1.5240994 1.3213278
-1.7077640 -1.5577363 1.3432009
-1.7036627 -1.5142303 1.3134844
-1.7094656 -1.5662692 1.3478791
-1.7138673 -1.5890367 1.3650753
-1.7161123 -1.5987534 1.3722306
-1.7044625 -1.5211182 1.3167128
-1.7042097 -1.5096175 1.3099851
-1.7083031 -1.5529591 1.3377034
-1.7091925 -1.5603933 1.3430058
-1.7055490 -1.5275021 1.3204204
-1.7137507 -1.5842884 1.3595084
-1.7155812 -1.5925499 1.3653853
-1.7113407 -1.5701001 1.3475547
-1.7087283 -1.5493593 1.3333111
-1.7053386 -1.4416619 1.2712637
-1.7056022 -1.4469846 1.2733734
-1.7153430 -1.5876991 1.3599198
-1.7060062 -1.5183423 1.3116270
-1.7080188 -1.5378166 1.3244259
-1.7059213 -1.5140148 1.3094371
-1.7073292 -1.5315021 1.3202853
-1.7067624 -1.5248512 1.3152307
-1.7171958 -1.5953366 1.3650721
-1.7057506 -1.4867724 1.2929859
-1.7130819 -1.5730902 1.3470829
-1.7103586 -1.5525007 1.3326991
-1.7116486 -1.5598481 1.3371511
-1.7154353 -1.5831675 1.3541353
-1.7167915 -1.5903929 1.3596943
-1.7188183 -1.5986468 1.3655812
-1.7090723 -1.5348056 1.3195243
-1.7098524 -1.5409113 1.3234918
-1.7078696 -1.5177972 1.3082433
-1.7147242 -1.5766743 1.3475944
-1.7087967 -1.5290293 1.3149329
-1.7120962 -1.5562429 1.3327686
-1.7141262 -1.5710103 1.3428974
-1.7168867 -1.5857883 1.3539778
-1.7200611 -1.6011410 1.3658009
-1.7183911 -1.5938380 1.3600784
-1.7079895 -1.4493874 1.2702118
-1.7133716 -1.5627477 1.3364156
-1.7082927 -1.4913973 1.2919398
-1.7164283 -1.5793629 1.3470886
-1.7109573 -1.5387652 1.3190487
-1.7089620 -1.4530210 1.2706915
-1.7125936 -1.5514863 1.3272483
-1.7105697 -1.5329896 1.3147790
-1.7200537 -1.5966288 1.3597447
-1.7099895 -1.5222559 1.3073156
-1.7160083 -1.5741786 1.3419175
-1.7149944 -1.5664071 1.3365645
-1.7124186 -1.5417885 1.3188792
-1.7180685 -1.5827317 1.3475356
-1.7218112 -1.6001677 1.3600424
-1.7144143 -1.5552027 1.3270226
-1.7099998 -1.5019729 1.2930698
-1.7137733 -1.5486247 1.3222105
-1.7163862 -1.5693827 1.3364087
-1.7124467 -1.5361212 1.3138087
-1.7178695 -1.5779060 1.3420449
-1.7160594 -1.5635116 1.3315492
-1.7195600 -1.5854330 1.3473008
-1.7234596 -1.6029529 1.3597141
-1.7129500 -1.4304339 1.2550825
-1.7159938 -1.5583514 1.3267186
-1.7221964 -1.5959334 1.3536994
-1.7118899 -1.4542035 1.2654589
-1.7195948 -1.5807434 1.3416711
-1.7139730 -1.4275031 1.2530043
-1.7112251 -1.4892461 1.2827548
-1.7123020 -1.5166919 1.2987392
-1.7131243 -1.5277261 1.3055641
-1.7210309 -1.5880432 1.3471522
-1.7142704 -1.5401804 1.3136173
-1.7121922 -1.5057710 1.2915141
-1.7179697 -1.5668605 1.3307390
-1.7153666 -1.5458110 1.3164695
-1.7117858 -1.4797837 1.2767477
-1.7141922 -1.5345811 1.3088602
-1.7163346 -1.5532467 1.3211730
-1.7249796 -1.6056723 1.3594588
-1.7235194 -1.5985971 1.3537684
-1.7129182 -1.5016269 1.2880388
-1.7197968 -1.5762387 1.3358803
-1.7225618 -1.5914183 1.3476002
-1.7211170 -1.5834749 1.3414062
-1.7133148 -1.4586553 1.2651536
-1.7247644 -1.6010221 1.3538091
-1.7162037 -1.5436041 1.3127496
-1.7133574 -1.4981148 1.2851426
-1.7137150 -1.5137360 1.2938330
-1.7177252 -1.5566655 1.3215396
-1.7197554 -1.5705839 1.3308270
-1.7172657 -1.5520174 1.3181763
-1.7158316 -1.5377259 1.3082557
-1.7153401 -1.5314413 1.3040935
-1.7147376 -1.5205559 1.2971530
-1.7226531 -1.5868080 1.3418881
-1.7241550 -1.5943458 1.3474272
-1.7260135 -1.6040629 1.3548498
-1.7137467 -1.4931668 1.2811425
-1.7142121 -1.5103516 1.2908235
-1.7216450 -1.5798323 1.3358078
-1.7157748 -1.4370189 1.2522602
-1.7146888 -1.4653481 1.2658310
-1.7148518 -1.4603384 1.2630245
-1.7143418 -1.4849018 1.2752881
-1.7148711 -1.5062578 1.2872807
-1.7253686 -1.5974061 1.3481912
-1.7180883 -1.5476822 1.3125429
-1.7167081 -1.4340205 1.2502166
-1.7195097 -1.5596496 1.3207178
-1.7155443 -1.5179049 1.2935306
-1.7174920 -1.5414925 1.3082833
-1.7240967 -1.5894518 1.3417098
-1.7191905 -1.5560998 1.3179716
-1.7155735 -1.5020018 1.2834975
-1.7174227 -1.5359230 1.3035035
-1.7159087 -1.4630215 1.2627421
-1.7234006 -1.5827519 1.3353581
-1.7194308 -1.5533683 1.3149697
-1.7170586 -1.5250166 1.2962427
-1.7269291 -1.6001815 1.3478814
-1.7163811 -1.5140443 1.2893727
-1.7160429 -1.4977552 1.2800763
-1.7210924 -1.5627770 1.3204361
-1.7199954 -1.5508410 1.3115488
-1.7165552 -1.4943132 1.2771197
-1.7181348 -1.5321761 1.2992337
-1.7186731 -1.5386273 1.3032435
-1.7238445 -1.5794180 1.3310699
-1.7171080 -1.5100151 1.2857748
-1.7176865 -1.5212922 1.2923026
-1.7212383 -1.5595588 1.3170175
-1.7229264 -1.5716372 1.3254287
-1.7167381 -1.4896895 1.2740304
-1.7286702 -1.6035732 1.3482989
-1.7170162 -1.4848808 1.2710475
-1.7177695 -1.5064747 1.2825352
-1.7228336 -1.4041907 1.2330008
-1.7180292 -1.4661459 1.2605328
-1.7191493 -1.5295178 1.2956409
-1.7207969 -1.5484023 1.3077088
-1.7185078 -1.5184840 1.2888445
-1.7192279 -1.4431891 1.2494510
-1.7216390 -1.5548490 1.3117270
-1.7221876 -1.5590348 1.3144373
-1.7203442 -1.5424683 1.3032583
-1.7245778 -1.5755382 1.3256504
-1.7299695 -1.6060787 1.3482587
-1.7182682 -1.5022927 1.2790515
-1.7200596 -1.4400966 1.2474712
-1.7268284 -1.5894512 1.3349835
-1.7200283 -1.5357188 1.2982674
-1.7259024 -1.5833650 1.3306554
-1.7191628 -1.5145653 1.2851188
-1.7188158 -1.4980875 1.2756038
-1.7235356 -1.5641098 1.3163641
-1.7199005 -1.5256093 1.2915239
-1.7188788 -1.4935954 1.2727810
-1.7310675 -1.6085179 1.3485595
-1.7297334 -1.6012528 1.3427741
-1.7192587 -1.4889994 1.2696076
-1.7248675 -1.4032261 1.2300172
-1.7229341 -1.4204031 1.2368998
-1.7219521 -1.5455486 1.3026558
-1.7261682 -1.5785410 1.3251680
-1.7198961 -1.5103388 1.2813166
-1.7206064 -1.5228728 1.2883623
-1.7235569 -1.5580824 1.3106613
-1.7230755 -1.5521621 1.3061973
-1.7199848 -1.4752326 1.2614590
-1.7277887 -1.5866265 1.3299119
-1.7218808 -1.5399804 1.2978756
-1.7204396 -1.5061803 1.2778192
-1.7218252 -1.5299274 1.2910871
-1.7207211 -1.4717888 1.2585514
-1.7213948 -1.5189468 1.2842645
-1.7208962 -1.5026729 1.2749211
-1.7221406 -1.4494225 1.2470461
-1.7259436 -1.5679819 1.3146988
-1.7257806 -1.4108003 1.2302145
-1.7336035 -1.6131552 1.3475139
-1.7254375 -1.5623223 1.3102941
-1.7294769 -1.5905391 1.3298628
-1.7263822 -1.4082669 1.2287838
-1.7216134 -1.4937753 1.2684598
-1.7221440 -1.5148466 1.2803314
-1.7229280 -1.4460987 1.2446271
-1.7274427 -1.4032327 1.2263825
-1.7225734 -1.4553394 1.2485593
-1.7252459 -1.5566798 1.3055747
-1.7229443 -1.5262948 1.2867377
-1.7221804 -1.4804475 1.2602578
-1.7226741 -1.5106414 1.2768774
-1.7228626 -1.4609688 1.2503405
-1.7236841 -1.5335424 1.2900518
-1.7318691 -1.5996292 1.3349441
-1.7352645 -1.6170096 1.3475244
-1.7228313 -1.4762032 1.2568981
-1.7231989 -1.5064093 1.2734521
-1.7279620 -1.5722796 1.3142802
-1.7257887 -1.5528645 1.3013768
-1.7311678 -1.5935703 1.3293061
-1.7277637 -1.4113619 1.2274958
-1.7275729 -1.5678229 1.3107010
-1.7275433 -1.5659591 1.3088943
-1.7266258 -1.4273724 1.2334655
-1.7333155 -1.6022517 1.3347839
-1.7242926 -1.5193891 1.2797058
-1.7301569 -1.3993642 1.2217179
-1.7274092 -1.5603445 1.3041502
-1.7248981 -1.4548275 1.2448306
-1.7274596 -1.4244339 1.2313077
-1.7258169 -1.4415439 1.2383775
-1.7254849 -1.4468101 1.2408332
-1.7241222 -1.4986935 1.2670922
-1.7250054 -1.4606394 1.2468609
-1.7256126 -1.4522204 1.2427934
-1.7297839 -1.5757042 1.3133898
-1.7287467 -1.4174319 1.2274040
-1.7312494 -1.3970368 1.2196358
-1.7244453 -1.4853576 1.2588302
-1.7319592 -1.5901103 1.3235256
-1.7292471 -1.4142786 1.2260308
-1.7278990 -1.5572734 1.3008576
-1.7259201 -1.5269597 1.2820505
-1.7250408 -1.4810263 1.2555369
-1.7303827 -1.4098829 1.2235433
-1.7255921 -1.4666008 1.2483833
-1.7295935 -1.5703297 1.3084056
-1.7284991 -1.4282326 1.2309897
-1.7293486 -1.5646901 1.3036820
-1.7266213 -1.5230712 1.2782949
-1.7276148 -1.4406350 1.2352432
-1.7322059 -1.5846846 1.3173032
-1.7380521 -1.6172198 1.3418857
-1.7336756 -1.5931045 1.3230415
-1.7317049 -1.5796601 1.3129551
-1.7317436 -1.4079717 1.2211192
-1.7290803 -1.4330568 1.2313251
-1.7272457 -1.4589907 1.2429240
-1.7300115 -1.5615952 1.3000895
-1.7335893 -1.5880859 1.3177070
-1.7312868 -1.4168862 1.2236006
-1.7284153 -1.4471994 1.2363335
-1.7316609 -1.5736975 1.3072673
-1.7276458 -1.4651940 1.2446289
-1.7310687 -1.4203383 1.2246378
-1.7397962 -1.6210326 1.3419317
-1.7351254 -1.5958820 1.3227327
-1.7283486 -1.4579099 1.2407749
-1.7313055 -1.5689013 1.3033424
-1.7333639 -1.4059668 1.2184807
-1.7287466 -1.4528120 1.2381426
-1.7271654 -1.4902696 1.2563367
-1.7285528 -1.5392627 1.2841652
-1.7365901 -1.6034561 1.3279403
-1.7334900 -1.5828116 1.3123269
-1.7350105 -1.3983690 1.2146882
-1.7309429 -1.4321281 1.2282305
-1.7349002 -1.5907994 1.3174616
-1.7363116 -1.5991629 1.3235476
-1.7392105 -1.6146576 1.3352586
-1.7320515 -1.4238838 1.2241966
-1.7334243 -1.5775487 1.3072294
-1.7319895 -1.5652630 1.2989877
-1.7347571 -1.4040211 1.2160639
-1.7382139 -1.6067790 1.3284255
-1.7312983 -1.4358533 1.2287670
-1.7295575 -1.4643414 1.2414895
-1.7304262 -1.4465906 1.2329569
-1.7364023 -1.5941773 1.3178935
-1.7405643 -1.6173294 1.3350609
-1.7332059 -1.5721460 1.3022679
-1.7352236 -1.5865593 1.3123987
-1.7307947 -1.5423224 1.2822507
-1.7347248 -1.4146195 1.2183093
-1.7321305 -1.4396829 1.2285537
-1.7311382 -1.4522777 1.2343127
-1.7301769 -1.4707311 1.2427021
-1.7364889 -1.5893048 1.3124522
-1.7338991 -1.5695364 1.2985913
-1.7298378 -1.4959160 1.2543447
-1.7322043 -1.4446514 1.2296931
-1.7298828 -1.4907183 1.2517180
-1.7313186 -1.4624995 1.2381088
-1.7343512 -1.4238012 1.2205108
-1.7381623 -1.5972419 1.3173391
-1.7349621 -1.5759789 1.3022951
-1.7322912 -1.4491135 1.2312052
-1.7374382 -1.5920593 1.3131974
-1.7365540 -1.5842699 1.3071427
-1.7378828 -1.4050303 1.2118032
-1.7341524 -1.4374490 1.2250079
-1.7413133 -1.6141843 1.3276886
-1.7340057 -1.4410964 1.2261662
-1.7398729 -1.6008624 1.3175344
-1.7357902 -1.5729753 1.2977001
-1.7365552 -1.5790115 1.3017390
-1.7354825 -1.4305275 1.2210117
-1.7336391 -1.4527896 1.2305534
-1.7392573 -1.4024226 1.2088942
-1.7387230 -1.4109772 1.2128384
-1.7338901 -1.4579057 1.2323713
-1.7427938 -1.6167894 1.3275443
-1.7383258 -1.5872454 1.3063398
-1.7338069 -1.4678410 1.2363819
-1.7324845 -1.4996551 1.2513834
-1.7412919 -1.6036447 1.3172231
-1.7440545 -1.6192281 1.3288733
-1.7405381 -1.5985971 1.3132793
-1.7382297 -1.5820596 1.3011698
-1.7329181 -1.4969998 1.2492542
-1.7377569 -1.5769082 1.2972681
-1.7338578 -1.5339190 1.2695946
-1.7345971 -1.5449864 1.2763743
-1.7356122 -1.4510859 1.2265765
-1.7400902 -1.5910809 1.3063634
-1.7376679 -1.4305490 1.2171527
-1.7456343 -1.6217777 1.3287753
-1.7363912 -1.4540134 1.2266545
-1.7371395 -1.4440876 1.2221927
-1.7361774 -1.5534658 1.2794678
-1.7367323 -1.5599060 1.2834847
-1.7413615 -1.5952252 1.3078168
-1.7400342 -1.5859678 1.3011245
-1.7425234 -1.6017360 1.3123332
-1.7394659 -1.5800479 1.2966589
-1.7421574 -1.5978317 1.3087642
-1.7351317 -1.5068770 1.2506944
-1.7387532 -1.4373155 1.2175945
-1.7370344 -1.5496562 1.2752740
-1.7465057 -1.6182791 1.3230283
-1.7352859 -1.5043949 1.2488754
-1.7385304 -1.5629291 1.2826027
-1.7419242 -1.5900491 1.3009120
-1.7411592 -1.5837640 1.2967520
-1.7364919 -1.4780370 1.2346917
-1.7361379 -1.4885133 1.2398053
-1.7358013 -1.5027535 1.2467681
-1.7383602 -1.5577760 1.2787055
-1.7434960 -1.5980248 1.3057579
-1.7447161 -1.6053092 1.3112508
-1.7463293 -1.6130366 1.3166124
-1.7477586 -1.6210028 1.3227820
-1.7391837 -1.4576040 1.2235775
-1.7401049 -1.5668652 1.2828620
-1.7406456 -1.4385565 1.2147855
-1.7428653 -1.5867981 1.2961964
-1.7453074 -1.6035483 1.3077371
-1.7464630 -1.6091515 1.3115386
-1.7386894 -1.5385809 1.2647029
-1.7450689 -1.6011188 1.3051416
-1.7401910 -1.5611682 1.2778736
-1.7378352 -1.5111188 1.2483731
-1.7481902 -1.6167858 1.3167062
-1.7382336 -1.5081997 1.2453479
-1.7392258 -1.4838248 1.2326986
-1.7388378 -1.4941521 1.2378275
-1.7418230 -1.5699254 1.2819410
-1.7389182 -1.4914482 1.2364937
-1.7446302 -1.5906785 1.2961786
-1.7418043 -1.4442596 1.2144565
-1.7480639 -1.6121040 1.3110577
-1.7467342 -1.6048405 1.3052746
-1.7417156 -1.5641605 1.2773510
-1.7411973 -1.5579134 1.2731456
-1.7457423 -1.5974484 1.2995634
-1.7498950 -1.6198147 1.3161515
-1.7400164 -1.5160988 1.2473061
-1.7464569 -1.5938886 1.2955044
-1.7410176 -1.4820679 1.2291006
-1.7524395 -1.6309541 1.3219442
-1.7482662 -1.6078272 1.3047643
-1.7499816 -1.6157562 1.3109620
-1.7432887 -1.5678762 1.2774204
-1.7439585 -1.4439852 1.2109200
-1.7405843 -1.5124058 1.2433983
-1.7430212 -1.5620697 1.2728589
-1.7411291 -1.4929372 1.2334470
-1.7539463 -1.6342377 1.3224855
-1.7417319 -1.4892685 1.2307450
-1.7514454 -1.6183794 1.3108172
-1.7499669 -1.6114656 1.3049497
-1.7483323 -1.5976121 1.2952801
-1.7449738 -1.5710751 1.2767075
-1.7422160 -1.5209693 1.2464180
-1.7523190 -1.6210626 1.3119642
-1.7455683 -1.5777235 1.2805796
-1.7491436 -1.6035373 1.2984730
-1.7447232 -1.5653242 1.2721507
-1.7451608 -1.4508003 1.2113545
-1.7543210 -1.6296079 1.3167736
-1.7433896 -1.4874424 1.2273158
-1.7515162 -1.6143836 1.3045307
-1.7428825 -1.5173822 1.2423478
-1.7537097 -1.6236649 1.3118284
-1.7432634 -1.4982080 1.2321750
-1.7499536 -1.6005404 1.2948247
-1.7504702 -1.6069932 1.2988197
-1.7462404 -1.5690808 1.2721779
-1.7471467 -1.4445642 1.2063145
-1.7441444 -1.4938507 1.2289940
-1.7457858 -1.5631243 1.2680965
-1.7551733 -1.6272427 1.3123683
-1.7560787 -1.6325370 1.3160464
-1.7534921 -1.6178351 1.3048793
-1.7484289 -1.4370227 1.2022771
-1.7456506 -1.5563735 1.2627700
-1.7480177 -1.5823924 1.2794854
-1.7473182 -1.4502799 1.2079379
-1.7445490 -1.5251065 1.2445389
-1.7462220 -1.5535799 1.2592621
-1.7455424 -1.4927832 1.2259720
-1.7555092 -1.6236295 1.3073892
-1.7569623 -1.6302221 1.3118509
-1.7577421 -1.6352484 1.3155367
-1.7551122 -1.6207268 1.3044561
-1.7455425 -1.5223519 1.2405834
-1.7479486 -1.5668628 1.2665998
-1.7498712 -1.4396363 1.2008739
-1.7486010 -1.4570799 1.2084231
-1.7465762 -1.5496727 1.2554762
-1.7475459 -1.5606455 1.2623731
-1.7534631 -1.6073582 1.2943486
-1.7467606 -1.4890017 1.2218064
-1.7593100 -1.6385688 1.3162880
-1.7548518 -1.6160321 1.2988546
-1.7469536 -1.5301681 1.2430267
-1.7567136 -1.6235004 1.3038866
-1.7483788 -1.5580596 1.2586840
-1.7509486 -1.5827849 1.2749870
-1.7589137 -1.6333315 1.3111985
-1.7503630 -1.4507408 1.2034009
-1.7478253 -1.4970379 1.2239528
-1.7500202 -1.5713501 1.2660050
-1.7599176 -1.6363715 1.3122552
-1.7487579 -1.5542461 1.2548090
-1.7581434 -1.6269626 1.3045357
-1.7507580 -1.4566335 1.2049251
-1.7517975 -1.4436477 1.1990859
-1.7515446 -1.4493126 1.2011390
-1.7483934 -1.4888230 1.2184762
-1.7560973 -1.6119465 1.2933494
-1.7569014 -1.6198229 1.2986091
-1.7491960 -1.4943197 1.2205527
-1.7501253 -1.5611824 1.2576969
-1.7528216 -1.5870659 1.2745795
-1.7593541 -1.6296553 1.3045815
-1.7488042 -1.5299370 1.2391315
-1.7615661 -1.6390424 1.3117772
-1.7534732 -1.4414191 1.1959386
-1.7494104 -1.5353978 1.2414253
-1.7512868 -1.5679989 1.2610397
-1.7519857 -1.4633697 1.2054577
-1.7509238 -1.5578227 1.2534711
-1.7498903 -1.5329293 1.2389356
-1.7608027 -1.6328972 1.3049006
-1.7631627 -1.6418575 1.3116708
-1.7534806 -1.4571757 1.2008592
-1.7506512 -1.5484289 1.2464373
-1.7521335 -1.5654073 1.2573572
-1.7597623 -1.6262724 1.2987624
-1.7545833 -1.4469094 1.1958103
-1.7508569 -1.5323158 1.2366536
-1.7531917 -1.5722383 1.2606768
-1.7535539 -1.5787905 1.2645682
-1.7621997 -1.6356305 1.3049050
-1.7515578 -1.4939701 1.2165880
-1.7511646 -1.5354586 1.2379616
-1.7547923 -1.4501525 1.1964166
-1.7542082 -1.4631538 1.2018829
-1.7528224 -1.5621219 1.2530489
-1.7603017 -1.6210705 1.2933082
-1.7639394 -1.6402407 1.3071790
-1.7613709 -1.6292030 1.2983038
-1.7549906 -1.4557382 1.1980514
-1.7520030 -1.5095723 1.2224033
-1.7640176 -1.6386917 1.3043035
-1.7563424 -1.4478074 1.1933560
-1.7529466 -1.5521874 1.2449341
-1.7526689 -1.5406854 1.2382046
-1.7551436 -1.5757554 1.2597390
-1.7553353 -1.5823473 1.2635664
-1.7568894 -1.5953608 1.2724036
-1.7614155 -1.6238535 1.2930032
-1.7536319 -1.5585614 1.2485969
-1.7550020 -1.4700184 1.2026382
-1.7629459 -1.6320913 1.2979007
-1.7568100 -1.4504239 1.1933893
-1.7531734 -1.5376479 1.2353280
-1.7543477 -1.4994135 1.2148347
-1.7589982 -1.6043702 1.2763108
-1.7660331 -1.6424565 1.3043562
-1.7563620 -1.4692970 1.2002787
-1.7645552 -1.6356452 1.2981793
-1.7576723 -1.4562900 1.1939561
-1.7539789 -1.5148851 1.2210368
-1.7587375 -1.5988831 1.2714342
-1.7551203 -1.5567870 1.2442457
-1.7549055 -1.5457223 1.2371618
-1.7603954 -1.6071613 1.2759825
-1.7571200 -1.4724839 1.1999864
-1.7676546 -1.6451535 1.3038753
-1.7583821 -1.4623005 1.1949395
-1.7548785 -1.5260632 1.2248111
-1.7635616 -1.6234682 1.2869483
-1.7648595 -1.6306991 1.2924911
-1.7660754 -1.6383891 1.2979012
-1.7593645 -1.4542925 1.1905689
-1.7558520 -1.5427935 1.2333684
-1.7563347 -1.5532170 1.2394706
-1.7588081 -1.5831423 1.2583660
-1.7593506 -1.5895881 1.2623737
-1.7600629 -1.5959576 1.2664649
-1.7691859 -1.6484247 1.3046649
-1.7619699 -1.6108085 1.2761408
-1.7596529 -1.4574014 1.1912170
-1.7581817 -1.4766769 1.1993260
-1.7568341 -1.5142340 1.2175119
-1.7560277 -1.5339552 1.2271353
-1.7676588 -1.6417189 1.2983967
-1.7573382 -1.5605911 1.2426897
-1.7663665 -1.6342395 1.2927847
-1.7571673 -1.5504893 1.2359273
-1.7621675 -1.6057330 1.2709206
-1.7641266 -1.6193353 1.2805051
-1.7618006 -1.5997512 1.2661441
-1.7637461 -1.6138233 1.2756511
-1.7581170 -1.5575243 1.2390249
-1.7586835 -1.5691377 1.2456831
-1.7607170 -1.5874073 1.2579769
-1.7613380 -1.5938192 1.2620238
-1.7677744 -1.6371526 1.2926360
-1.7576929 -1.5464466 1.2323001
-1.7572698 -1.5309868 1.2235170
-1.7593656 -1.5761371 1.2487599
-1.7656334 -1.6227123 1.2809325
-1.7601619 -1.4764873 1.1961802
-1.7637341 -1.6085427 1.2705793
-1.7594692 -1.5650472 1.2417571
-1.7693615 -1.6399249 1.2923254
-1.7713793 -1.6491047 1.2997586
-1.7636495 -1.6030217 1.2654211
-1.7593967 -1.5543404 1.2343220
-1.7657173 -1.6175257 1.2754591
-1.7624920 -1.4607318 1.1874766
-1.7599171 -1.4956195 1.2030208
-1.7589794 -1.5395121 1.2253021
-1.7633009 -1.5980601 1.2616604
-1.7670629 -1.6253435 1.2807651
-1.7599888 -1.5618691 1.2385509
-1.7596243 -1.5509465 1.2316780
-1.7652461 -1.6120579 1.2708621
-1.7609335 -1.5728446 1.2442302
-1.7602475 -1.5202026 1.2149186
-1.7595427 -1.5352243 1.2219628
-1.7614489 -1.5795917 1.2479532
-1.7612874 -1.4836555 1.1961757
-1.7709694 -1.6432845 1.2927870
-1.7729622 -1.6518616 1.2996963
-1.7601087 -1.5311529 1.2191139
-1.7614894 -1.5695770 1.2411171
-1.7639130 -1.5943666 1.2573482
-1.7645756 -1.6007582 1.2614151
-1.7673728 -1.6206608 1.2751478
-1.7654635 -1.6068904 1.2654151
-1.7613904 -1.5588657 1.2336840
-1.7669275 -1.6148742 1.2702083
-1.7724730 -1.6458439 1.2926817
-1.7619536 -1.5655594 1.2374540
-1.7611573 -1.5390826 1.2213794
-1.7626929 -1.5722892 1.2408288
-1.7629279 -1.5773647 1.2436105
-1.7631747 -1.4827054 1.1931264
-1.7618453 -1.5548388 1.2300294
-1.7671200 -1.6098678 1.2649151
-1.7624879 -1.4983906 1.1999663
-1.7693239 -1.6244950 1.2748348
-1.7658756 -1.5978677 1.2564088
-1.7686272 -1.6186778 1.2705717
-1.7665607 -1.6039923 1.2603542
-1.7621272 -1.5352723 1.2177367
-1.7728151 -1.6414421 1.2865020
-1.7630743 -1.5017463 1.2003030
-1.7659287 -1.4620784 1.1822812
-1.7642521 -1.5800313 1.2433791
-1.7634103 -1.5634262 1.2330131
-1.7640012 -1.5698683 1.2366580
-1.7686213 -1.6134050 1.2651793
-1.7657090 -1.4683816 1.1837918
-1.7706612 -1.6271699 1.2746257
-1.7640319 -1.5597080 1.2291405
-1.7683877 -1.6079983 1.2602173
-1.7744391 -1.6448603 1.2869103
-1.7648588 -1.4904213 1.1928995
-1.7635303 -1.5442665 1.2202489
-1.7678260 -1.6020876 1.2560643
-1.7651443 -1.5770992 1.2395637
-1.7705439 -1.6218494 1.2695830
-1.7649424 -1.5000297 1.1966793
-1.7640931 -1.5399742 1.2169030
-1.7665005 -1.5836962 1.2431761
-1.7722741 -1.6309047 1.2750396
-1.7770560 -1.6541287 1.2931184
-1.7759000 -1.6475089 1.2867266
-1.7661021 -1.4891550 1.1904934
-1.7659374 -1.5736339 1.2354815
-1.7656446 -1.5673125 1.2313725
-1.7678291 -1.4666254 1.1798948
-1.7701175 -1.6111783 1.2595696
-1.7656714 -1.5073889 1.1982869
-1.7723836 -1.6259084 1.2693917
-1.7676857 -1.5813107 1.2381515
-1.7741394 -1.6339985 1.2741321
-1.7663827 -1.5645945 1.2278061
-1.7716886 -1.6149155 1.2596406
-1.7689854 -1.4743736 1.1811008
-1.7672296 -1.5056364 1.1951002
-1.7677558 -1.5721223 1.2305324
-1.7743828 -1.6293473 1.2684732
-1.7710025 -1.4671470 1.1764398
-1.7678561 -1.5118705 1.1964804
-1.7758043 -1.6327037 1.2689286
-1.7692978 -1.4951738 1.1877652
-1.7687567 -1.5687919 1.2258694
-1.7734231 -1.6129688 1.2537617
-1.7787463 -1.6485406 1.2790292
-1.7697866 -1.5003689 1.1888135
-1.7699726 -1.5760922 1.2288068
-1.7771624 -1.6353532 1.2687465
-1.7748387 -1.4496383 1.1665784
-1.7719655 -1.4747507 1.1766335
-1.7784378 -1.6430761 1.2741335
-1.7698705 -1.5112905 1.1930861
-1.7756204 -1.6227045 1.2582607
-1.7734619 -1.4734295 1.1743918
-1.7705358 -1.5175119 1.1944888
-1.7753479 -1.6172244 1.2533771
-1.7773944 -1.6307812 1.2630071
-1.7811542 -1.6541298 1.2799943
-1.7710705 -1.5735399 1.2247414
-1.7787648 -1.6382103 1.2683589
-1.7717323 -1.5002939 1.1854905
-1.7802986 -1.6469502 1.2738309
-1.7754977 -1.4572912 1.1665494
-1.7706737 -1.5323066 1.2009704
-1.7720009 -1.5807266 1.2280633
-1.7720883 -1.5059596 1.1872562
-1.7775339 -1.6258522 1.2573007
-1.7790256 -1.6342736 1.2633302
-1.7817835 -1.6499472 1.2735943
-1.7715990 -1.5552874 1.2111181
-1.7731346 -1.5781166 1.2240609
-1.7725663 -1.5203389 1.1923770
-1.7753743 -1.4807202 1.1740369
-1.7728102 -1.5170125 1.1906081
-1.7725758 -1.5673383 1.2170155
-1.7843053 -1.6600370 1.2803609
-1.7804097 -1.6369066 1.2631634
-1.7793493 -1.6296069 1.2573967
-1.7740512 -1.5851317 1.2271726
-1.7730773 -1.5229647 1.1926615
-1.7831837 -1.6532578 1.2741005
-1.7736142 -1.5742029 1.2202945
-1.7731925 -1.5376457 1.1992629
-1.7758707 -1.5986092 1.2343320
-1.7782251 -1.6182971 1.2479218
-1.7859451 -1.6625568 1.2802786
-1.7817315 -1.6395357 1.2630022
-1.7746248 -1.5059643 1.1830376
-1.7844940 -1.6559088 1.2741919
-1.7809323 -1.6324539 1.2570208
-1.7836269 -1.6482455 1.2684633
-1.7751324 -1.5815592 1.2227624
-1.7740278 -1.5600642 1.2098819
-1.7750263 -1.5116871 1.1847609
-1.7760079 -1.5887724 1.2261234
-1.7761537 -1.4992364 1.1783569
-1.7750267 -1.5712487 1.2153819
-1.7786628 -1.6135675 1.2423512
-1.7806208 -1.6271747 1.2519426
-1.7798869 -1.6214529 1.2475855
-1.7858830 -1.6583851 1.2741731
-1.7848509 -1.6509124 1.2685483
-1.7758634 -1.5779078 1.2188404
-1.7823733 -1.6357844 1.2575038
-1.7776269 -1.6016269 1.2334572
-1.7754703 -1.5242547 1.1893547
-1.7755772 -1.5219229 1.1881582
-1.7751207 -1.5370807 1.1958413
-1.7754630 -1.5429434 1.1979997
-1.7768477 -1.5856600 1.2225154
-1.7759147 -1.5273966 1.1901355
-1.7823036 -1.6308196 1.2521179
-1.7803061 -1.6166979 1.2417335
-1.7837256 -1.6384835 1.2572749
-1.7817073 -1.6253252 1.2475665
-1.7762710 -1.5642339 1.2084787
-1.7778855 -1.5930875 1.2256781
-1.7792100 -1.6055038 1.2337728
-1.7763153 -1.5592795 1.2056117
-1.7865151 -1.6535992 1.2680427
-1.7775421 -1.5130683 1.1813401
-1.7779063 -1.5824075 1.2182361
-1.7888172 -1.6640703 1.2747595
-1.7773871 -1.5722895 1.2118241
-1.7786115 -1.5892643 1.2218586
-1.7838525 -1.6337394 1.2517011
-1.7780531 -1.5179796 1.1823109
-1.7771994 -1.5514821 1.1993231
-1.7820126 -1.6204569 1.2417972
-1.7880797 -1.6573338 1.2684433
-1.7778423 -1.5273244 1.1867847
-1.7776246 -1.5423237 1.1942358
-1.7793011 -1.5058282 1.1756406
-1.7782142 -1.5327652 1.1888046
-1.7779547 -1.5471342 1.1961004
-1.7787165 -1.5793658 1.2145470
-1.7804155 -1.6026296 1.2287476
-1.7904276 -1.6674051 1.2752457
-1.7800975 -1.5965554 1.2243877
-1.7784725 -1.5688017 1.2074122
-1.7785669 -1.5638713 1.2045262
-1.7854063 -1.6365868 1.2513255
-1.7895794 -1.6599203 1.2680489
-1.7864021 -1.4432124 1.1473430
-1.7831052 -1.6176326 1.2367184
-1.7886386 -1.6531102 1.2620790
-1.7796225 -1.5760126 1.2103507
-1.7846038 -1.6264011 1.2421220
-1.7867853 -1.6400711 1.2516620
-1.7796781 -1.5561285 1.1982341
-1.7910783 -1.6633805 1.2687036
-1.7808455 -1.5831359 1.2133956
-1.7822744 -1.6008234 1.2236677
-1.7807768 -1.5184222 1.1776855
-1.7886625 -1.6485647 1.2563180
-1.7901333 -1.6557088 1.2619397
-1.7802401 -1.5467373 1.1921414
-1.7805215 -1.5324781 1.1847380
-1.7807636 -1.5685195 1.2034803
-1.7823997 -1.5056134 1.1711966
-1.7809835 -1.5383835 1.1868663
-1.7810055 -1.5639609 1.2006641
-1.7836577 -1.6095652 1.2281401
-1.7861781 -1.6296012 1.2417355
-1.7817922 -1.5805462 1.2097315
-1.7828464 -1.5971940 1.2196879
-1.7929144 -1.6664385 1.2681101
-1.7888342 -1.6435446 1.2507053
-1.7820038 -1.5561528 1.1944155
-1.7823068 -1.5764859 1.2057259
-1.7830441 -1.5875570 1.2125083
-1.7863854 -1.6245546 1.2361338
-1.7907933 -1.6524792 1.2559527
-1.7844046 -1.6043247 1.2224001
-1.7835409 -1.5091933 1.1703757
-1.7928663 -1.6614551 1.2624799
-1.7946657 -1.6699711 1.2683947
-1.7824684 -1.5518943 1.1910114
-1.7891571 -1.6396368 1.2456484
-1.7830117 -1.5725405 1.2021219
-1.7905994 -1.6473495 1.2507551
-1.7899888 -1.4484993 1.1437504
-1.7830824 -1.5676041 1.1991432
-1.7848832 -1.6015707 1.2192014
-1.7832254 -1.5416172 1.1847095
-1.7897416 -1.4515302 1.1442478
-1.7831728 -1.5379285 1.1829606
-1.7943981 -1.6648579 1.2629055
-1.7861194 -1.6085626 1.2223787
-1.7837993 -1.5289624 1.1769900
-1.7884629 -1.6287422 1.2358182
-1.7904819 -1.6423178 1.2454362
-1.7927817 -1.6557531 1.2551732
-1.7960772 -1.6726306 1.2682028
-1.7843796 -1.5802823 1.2045483
-1.7897746 -1.4589208 1.1460466
-1.7921945 -1.6503135 1.2502648
-1.7898353 -1.4614728 1.1464730
-1.7854440 -1.5122313 1.1684185
-1.7842498 -1.5601418 1.1926697
-1.7936489 -1.6583732 1.2563481
-1.7957594 -1.6675432 1.2629504
-1.7916480 -1.4511768 1.1419980
-1.7849062 -1.5722909 1.1984009
-1.7851135 -1.5773982 1.2011558
-1.7869460 -1.6049860 1.2179505
-1.7878028 -1.6117661 1.2213030
-1.7914657 -1.4588453 1.1437477
-1.7950721 -1.6610100 1.2561798
-1.7937597 -1.6538528 1.2505487
-1.7972658 -1.6703291 1.2626346
-1.7859108 -1.5290543 1.1730479
-1.7859312 -1.5428266 1.1804875
-1.7864927 -1.5847305 1.2036137
-1.7908876 -1.6326516 1.2341570
-1.7932819 -1.6483925 1.2456457
-1.7863073 -1.5340755 1.1754259
-1.7923126 -1.4621341 1.1433246
-1.7926009 -1.6407568 1.2388779
-1.7966452 -1.6639571 1.2559817
-1.7887729 -1.6092440 1.2175618
-1.7893691 -1.6159083 1.2213607
-1.7954448 -1.6568358 1.2500389
-1.7990825 -1.6739953 1.2628084
-1.7950492 -1.6515309 1.2450135
-1.7939005 -1.6439662 1.2394738
-1.7981832 -1.6673003 1.2564615
-1.7944126 -1.4562150 1.1392338
-1.7969883 -1.6596841 1.2496815
-1.7906631 -1.6129030 1.2164728
-1.7911766 -1.6193933 1.2204292
-1.7953088 -1.6466442 1.2392622
-1.7885888 -1.5347010 1.1710588
-1.7945134 -1.4654817 1.1409935
-1.7885911 -1.5393584 1.1737220
-1.7885045 -1.5485007 1.1784428
-1.7894968 -1.5902578 1.2017994
-1.7933417 -1.6332653 1.2294437
-1.7996101 -1.6699591 1.2562704
-1.8010836 -1.6771096 1.2618950
-1.7968094 -1.6552793 1.2450915
-1.7984333 -1.6631332 1.2503275
-1.7890959 -1.5702976 1.1888792
-1.7995587 -1.6654462 1.2504778
-1.7926328 -1.6213268 1.2186185
-1.7931632 -1.6235062 1.2198569
-1.7985094 -1.6581314 1.2444303
-1.7954711 -1.6374272 1.2291541
-1.7928011 -1.6175348 1.2153898
-1.7971302 -1.6455636 1.2338506
-1.8011054 -1.6688097 1.2509362
-1.7912189 -1.5403611 1.1690452
-1.8003516 -1.6619885 1.2447012
-1.8036052 -1.6780991 1.2571396
-1.7951709 -1.6267846 1.2187575
-1.7916312 -1.5741728 1.1860895
-1.7984859 -1.6482202 1.2336612
-1.7916558 -1.5452354 1.1703907
-1.8025866 -1.6714152 1.2507913
-1.8051805 -1.6814541 1.2576092
-1.8017936 -1.6646494 1.2445059
-1.7956269 -1.6249860 1.2158075
-1.7953521 -1.6219368 1.2136031
-1.8010734 -1.6577789 1.2383212
-1.8040996 -1.6740040 1.2506597
-1.7967978 -1.6302228 1.2185887
-1.7941204 -1.5994942 1.1984274
-1.7943857 -1.5947441 1.1954054
-1.8032301 -1.6672252 1.2441223
-1.8024187 -1.6603902 1.2381764
-1.7937981 -1.5460352 1.1670007
-1.7935611 -1.5643390 1.1764149
-1.7975099 -1.6261885 1.2132351
-1.7940364 -1.5506078 1.1686158
-1.7944342 -1.5759368 1.1822614
-1.8046643 -1.6706609 1.2447845
-1.7988531 -1.6339730 1.2179281
-1.8038078 -1.6636508 1.2387311
-1.7963450 -1.6040878 1.1977531
-1.7951744 -1.5885610 1.1880143
-1.7965531 -1.5997073 1.1944227
-1.7992548 -1.6291368 1.2124420
-1.8050188 -1.6662394 1.2388886
-1.8023718 -1.6514056 1.2278515
-1.8007377 -1.6379230 1.2178442
-1.8086409 -1.6833627 1.2514275
-1.7962841 -1.5694838 1.1749572
-1.7964794 -1.5514506 1.1652537
-1.8005040 -1.6324483 1.2129531
-1.7983801 -1.6075207 1.1965451
-1.7967622 -1.5558920 1.1669148
-1.8064310 -1.6688435 1.2384735
-1.8003399 -1.6282502 1.2094334
-1.7975891 -1.5917550 1.1863357
-1.7996275 -1.6206113 1.2039694
-1.8041033 -1.6542664 1.2271719
-1.8054698 -1.6618709 1.2326687
-1.7986978 -1.6035056 1.1928581
-1.8024343 -1.6411142 1.2171842
-1.8021098 -1.6354104 1.2124685
-1.8069058 -1.6651778 1.2331777
-1.8019506 -1.4914755 1.1342788
-1.7981531 -1.5690794 1.1713859
-1.8000586 -1.6115096 1.1963370
-1.8083417 -1.6728494 1.2386006
-1.8015283 -1.6248474 1.2039434
-1.7987333 -1.5744207 1.1735625
-1.8024819 -1.6325268 1.2090454
-1.8041372 -1.6448641 1.2172436
-1.8037727 -1.4805876 1.1289758
-1.8001089 -1.5136092 1.1423158
-1.8011131 -1.6188236 1.1995915
-1.8052477 -1.6526129 1.2226108
-1.8005342 -1.6076890 1.1925446
-1.8082126 -1.6677424 1.2330784
-1.7992650 -1.5559035 1.1627023
-1.8000978 -1.5969926 1.1854297
-1.8039389 -1.6393394 1.2124023
-1.7993882 -1.5611941 1.1652751
-1.8108096 -1.6828475 1.2438799
-1.8099068 -1.6758020 1.2381234
-1.8001913 -1.5824119 1.1758476
-1.8023234 -1.6215457 1.1993130
-1.8067599 -1.6555509 1.2221476
-1.8094398 -1.6703878 1.2331821
-1.8056946 -1.6478340 1.2167494
-1.8125250 -1.6863035 1.2445020
-1.8031098 -1.5047057 1.1361742
-1.8010256 -1.5932874 1.1811335
-1.8036868 -1.6282691 1.2027530
-1.8007599 -1.5742381 1.1698907
-1.8024108 -1.6111990 1.1915428
-1.8113513 -1.6787531 1.2376700
-1.8009447 -1.5790291 1.1724621
-1.8020358 -1.6013831 1.1849214
-1.8058958 -1.6425618 1.2113554
-1.8019202 -1.5365483 1.1493531
-1.8072546 -1.6508745 1.2162270
-1.8139951 -1.6890031 1.2442680
-1.8050919 -1.4974974 1.1314879
-1.8029313 -1.5192195 1.1404346
-1.8016584 -1.5612379 1.1614234
-1.8041781 -1.6253893 1.1989427
-1.8069620 -1.4847516 1.1256128
-1.8129775 -1.6822912 1.2379545
-1.8029102 -1.5975567 1.1807406
-1.8022608 -1.5517597 1.1554408
-1.8024705 -1.5863900 1.1741219
-1.8120021 -1.6762196 1.2336371
-1.8041021 -1.6152069 1.1910249
-1.8155405 -1.6922250 1.2448676
-1.8077649 -1.6465991 1.2111864
-1.8066335 -1.4954759 1.1288016
-1.8037017 -1.5304274 1.1440976
-1.8034629 -1.5344211 1.1460633
-1.8029256 -1.5828714 1.1712366
-1.8045452 -1.5175115 1.1379226
-1.8090001 -1.6546844 1.2162337
-1.8031693 -1.5785553 1.1682699
-1.8045803 -1.6113762 1.1875380
-1.8055039 -1.6229106 1.1939250
-1.8145184 -1.6850118 1.2376962
-1.8061406 -1.6288958 1.1979982
-1.8046948 -1.6018496 1.1803072
-1.8139340 -1.6796683 1.2327012
-1.8064806 -1.5106824 1.1335496
-1.8060110 -1.5152862 1.1354298
-1.8039756 -1.5652039 1.1597188
-1.8094165 -1.6498117 1.2105014
-1.8107324 -1.6578602 1.2155808
-1.8044925 -1.5707715 1.1616444
-1.8049294 -1.5425781 1.1470530
-1.8044618 -1.5518248 1.1515469
-1.8046266 -1.5570759 1.1541712
-1.8165667 -1.6900181 1.2392351
-1.8062836 -1.6154379 1.1869647
-1.8100952 -1.4869466 1.1218633
-1.8051988 -1.5875881 1.1700361
-1.8068300 -1.6199925 1.1889572
-1.8073012 -1.6267731 1.1935338
-1.8079904 -1.6331605 1.1976074
-1.8053036 -1.5831144 1.1671988
-1.8054681 -1.5784149 1.1641839
-1.8159785 -1.6836706 1.2325488
-1.8110594 -1.6535079 1.2106161
-1.8100622 -1.4932146 1.1235003
-1.8084686 -1.5097374 1.1305298
-1.8064145 -1.5360636 1.1421279
-1.8061736 -1.5400581 1.1440956
-1.8065515 -1.6054162 1.1793215
-1.8178992 -1.6925353 1.2391880
-1.8075208 -1.5231445 1.1360905
-1.8125676 -1.6616495 1.2153079
-1.8098506 -1.5014822 1.1260659
-1.8064120 -1.5703402 1.1581006
-1.8084849 -1.6242915 1.1885081
-1.8067103 -1.5754970 1.1604081
-1.8070036 -1.5911554 1.1690603
-1.8067747 -1.5566077 1.1502694
-1.8195107 -1.6958549 1.2396965
-1.8176341 -1.6865629 1.2321235
-1.8125246 -1.6564386 1.2101582
-1.8092217 -1.5209159 1.1331279
-1.8146300 -1.4698165 1.1120881
-1.8073557 -1.5868197 1.1657060
-1.8072923 -1.5620872 1.1522895
-1.8141488 -1.6648777 1.2149010
-1.8124853 -1.4922985 1.1198489
-1.8076982 -1.5831829 1.1629170
-1.8148359 -1.4734293 1.1120236
-1.8087556 -1.5348323 1.1377718
-1.8192463 -1.6899170 1.2325862
-1.8139856 -1.6595131 1.2099099
-1.8090732 -1.5380688 1.1386355
-1.8103715 -1.6277111 1.1876436
-1.8111601 -1.5153802 1.1285473
-1.8088295 -1.5457127 1.1420911
-1.8085429 -1.5554424 1.1467285
-1.8083834 -1.5791118 1.1593596
-1.8125200 -1.6468597 1.2004059
-1.8158723 -1.6685580 1.2147444
-1.8089972 -1.5755346 1.1565651
-1.8192750 -1.6851734 1.2270045
-1.8091659 -1.5619117 1.1490201
-1.8172715 -1.4711165 1.1087500
-1.8105561 -1.6188855 1.1797382
-1.8108719 -1.6249673 1.1836864
-1.8214986 -1.6946053 1.2330928
-1.8158030 -1.6632682 1.2096657
-1.8141562 -1.4972680 1.1188155
-1.8097149 -1.5871819 1.1615398
-1.8141274 -1.6501174 1.1996759
-1.8172091 -1.4740634 1.1089948
-1.8173335 -1.6715407 1.2145604
-1.8123174 -1.6316719 1.1871642
-1.8130154 -1.6380498 1.1912422
-1.8101543 -1.5816183 1.1574992
-1.8209500 -1.6886428 1.2270930
-1.8128914 -1.6283163 1.1829057
-1.8188028 -1.6743421 1.2142257
-1.8111474 -1.5847306 1.1574188
-1.8113527 -1.5606327 1.1446935
-1.8177037 -1.6667884 1.2086798
-1.8158281 -1.6532683 1.1990112
-1.8226266 -1.6914490 1.2267490
-1.8148770 -1.6421750 1.1909856
-1.8128769 -1.6235731 1.1786169
-1.8163839 -1.4995739 1.1163873
-1.8124771 -1.5417819 1.1343456
-1.8116882 -1.5804514 1.1540508
-1.8119290 -1.5662574 1.1465788
-1.8203586 -1.6778371 1.2145536
-1.8241301 -1.6942130 1.2267348
-1.8174329 -1.6570009 1.1991288
-1.8154316 -1.5148316 1.1201777
-1.8168546 -1.6509724 1.1947192
-1.8148453 -1.6323510 1.1823594
-1.8251890 -1.6971851 1.2275735
-1.8168256 -1.6455383 1.1897973
-1.8219612 -1.6806641 1.2141952
-1.8134671 -1.5861388 1.1536715
-1.8138510 -1.5659354 1.1430195
-1.8138101 -1.5903821 1.1554209
-1.8148350 -1.6230111 1.1740267
-1.8154227 -1.6274683 1.1769920
-1.8190628 -1.6599393 1.1986696
-1.8243688 -1.6903958 1.2213096
-1.8186576 -1.6548812 1.1946722
-1.8144728 -1.5722891 1.1447015
-1.8166984 -1.6357624 1.1814987
-1.8265419 -1.6998551 1.2273771
-1.8217883 -1.6744068 1.2074118
-1.8236277 -1.6841672 1.2145283
-1.8179596 -1.6425351 1.1848904
-1.8187357 -1.6496438 1.1895632
-1.8258302 -1.6930639 1.2211072
-1.8150503 -1.5879334 1.1517018
-1.8280913 -1.7028173 1.2271658
-1.8230293 -1.6769453 1.2073351
-1.8204459 -1.6580858 1.1939581
-1.8251168 -1.6868350 1.2143242
-1.8172424 -1.6276211 1.1729868
-1.8272924 -1.6958377 1.2208054
-1.8195307 -1.6465431 1.1850637
-1.8239810 -1.6798295 1.2082681
-1.8189455 -1.5218332 1.1166240
-1.8164364 -1.5953115 1.1528716
-1.8167249 -1.6065388 1.1593902
-1.8172601 -1.6228489 1.1687201
-1.8255406 -1.6851510 1.2112940
-1.8263928 -1.6894409 1.2144514
-1.8222025 -1.6612848 1.1932989
-1.8171793 -1.5629037 1.1347712
-1.8170193 -1.5917490 1.1500594
-1.8288372 -1.6993834 1.2213672
-1.8170984 -1.5777328 1.1424581
-1.8256278 -1.6826613 1.2079040
-1.8177942 -1.6031215 1.1553226
-1.8181286 -1.6143390 1.1618641
-1.8278566 -1.6926270 1.2148161
-1.8251090 -1.6780187 1.2035636
-1.8215446 -1.6498776 1.1839076
-1.8207396 -1.5225887 1.1145263
-1.8196196 -1.6322613 1.1719118
-1.8189279 -1.5472005 1.1252362
-1.8192421 -1.6263310 1.1678319
-1.8184553 -1.5996659 1.1519925
-1.8191047 -1.6114910 1.1584809
-1.8195221 -1.6221393 1.1643262
-1.8241304 -1.6651433 1.1929247
-1.8292403 -1.6953657 1.2148212
-1.8278544 -1.6868700 1.2078079
-1.8200093 -1.6185881 1.1614908
-1.8193046 -1.5767682 1.1382594
-1.8192341 -1.5957463 1.1482975
-1.8196847 -1.6073951 1.1549241
-1.8268896 -1.6810779 1.2029803
-1.8199017 -1.5683196 1.1330391
-1.8215689 -1.6361298 1.1709849
-1.8236601 -1.6541427 1.1832013
-1.8198171 -1.5823421 1.1401792
-1.8308367 -1.6982352 1.2144213
-1.8203677 -1.6032124 1.1510604
-1.8294724 -1.6896299 1.2072473
-1.8213668 -1.5420124 1.1188225
-1.8262137 -1.6685620 1.1920734
-1.8330743 -1.7080966 1.2214344
-1.8217795 -1.6266489 1.1633525
-1.8215283 -1.6104641 1.1539610
-1.8216666 -1.6155750 1.1566989
-1.8219085 -1.6221406 1.1605400
-1.8212079 -1.6002140 1.1477165
-1.8324721 -1.7018023 1.2146977
-1.8306664 -1.6927498 1.2079555
-1.8220737 -1.5529438 1.1228000
-1.8214608 -1.5918675 1.1422987
-1.8219017 -1.6069942 1.1510116
-1.8217744 -1.5820338 1.1366162
-1.8316977 -1.6951254 1.2083144
-1.8221899 -1.5680523 1.1289513
-1.8220477 -1.5875740 1.1389651
-1.8279028 -1.6729235 1.1915733
-1.8291751 -1.6805741 1.1970326
-1.8338847 -1.7045606 1.2144153
-1.8230410 -1.6096166 1.1508803
-1.8225501 -1.5734680 1.1309985
-1.8253146 -1.5281838 1.1095452
-1.8235242 -1.5512097 1.1196883
-1.8234677 -1.6194051 1.1562404
-1.8240498 -1.6305811 1.1620603
-1.8243205 -1.6366995 1.1659173
-1.8236393 -1.5558744 1.1216075
-1.8237144 -1.6148835 1.1530574
-1.8233229 -1.6045161 1.1469149
-1.8242057 -1.5476138 1.1169328
-1.8241504 -1.6264036 1.1593224
-1.8305750 -1.6832443 1.1968269
-1.8352592 -1.7079005 1.2151664
-1.8335189 -1.6981264 1.2077782
-1.8328441 -1.6933182 1.2033480
-1.8252954 -1.6228447 1.1553944
-1.8244142 -1.5732870 1.1277379
-1.8294011 -1.5034503 1.0961082
-1.8250610 -1.5588035 1.1206791
-1.8242667 -1.5922956 1.1377271
-1.8320649 -1.6866026 1.1972792
-1.8242309 -1.5871537 1.1350187
-1.8365746 -1.7104450 1.2150887
-1.8352078 -1.7017297 1.2080169
-1.8260947 -1.6348671 1.1612845
-1.8255115 -1.6144346 1.1496263
-1.8253043 -1.6082539 1.1457948
-1.8259727 -1.5467350 1.1137898
-1.8250235 -1.5781110 1.1291911
-1.8258077 -1.6186770 1.1518951
-1.8266489 -1.6410577 1.1651227
-1.8273274 -1.6474578 1.1692037
-1.8280368 -1.6538322 1.1732915
-1.8307389 -1.6733598 1.1870311
-1.8344421 -1.6962684 1.2031414
-1.8264923 -1.6306738 1.1577921
-1.8379776 -1.7130276 1.2149701
-1.8322539 -1.6820284 1.1915543
-1.8367439 -1.7045569 1.2076601
-1.8319675 -1.6760827 1.1867708
-1.8267983 -1.5568457 1.1169165
-1.8274727 -1.6274040 1.1543521
-1.8291560 -1.6508902 1.1683249
-1.8297495 -1.6568853 1.1723863
-1.8328213 -1.4949220 1.0891426
-1.8290780 -1.5279620 1.1024191
-1.8265658 -1.5916077 1.1333667
-1.8266882 -1.5962316 1.1360842
-1.8281603 -1.6385272 1.1602237
-1.8364003 -1.6994049 1.2024873
-1.8270719 -1.6125873 1.1453135
-1.8337914 -1.6847806 1.1912650
-1.8381161 -1.7078537 1.2081933
-1.8271829 -1.5778845 1.1254902
-1.8287312 -1.5414624 1.1075759
-1.8355073 -1.6926571 1.1961951
-1.8374310 -1.7023365 1.2036447
-1.8279662 -1.6170036 1.1466207
-1.8287877 -1.6353376 1.1566697
-1.8283322 -1.6198993 1.1478535
-1.8286528 -1.5523787 1.1118017
-1.8312905 -1.6600828 1.1720556
-1.8351642 -1.6882030 1.1916545
-1.8393109 -1.7102780 1.2082412
-1.8309588 -1.6548883 1.1681903
-1.8330417 -1.5097845 1.0926049
-1.8370527 -1.6959976 1.1966676
-1.8294516 -1.5480404 1.1086084
-1.8299116 -1.6317923 1.1527053
-1.8405441 -1.7128996 1.2083565
-1.8340197 -1.5068642 1.0904917
-1.8293514 -1.5628962 1.1149402
-1.8342808 -1.6756298 1.1808042
-1.8352624 -1.6830016 1.1861955
-1.8363911 -1.6907286 1.1915951
-1.8298544 -1.6277780 1.1501843
-1.8353139 -1.4980672 1.0864610
-1.8330333 -1.6637789 1.1718279
-1.8353654 -1.5005879 1.0870572
-1.8317320 -1.6515380 1.1635480
-1.8385322 -1.6986361 1.1964917
-1.8400920 -1.7073917 1.2032402
-1.8296074 -1.6176130 1.1426329
-1.8326666 -1.6580974 1.1674704
-1.8308865 -1.6390605 1.1551800
-1.8301087 -1.6199293 1.1436117
-1.8419940 -1.7153807 1.2083258
-1.8324709 -1.5339359 1.0998135
-1.8311889 -1.5471600 1.1054483
-1.8298410 -1.5833164 1.1232572
-1.8317981 -1.6459104 1.1588337
-1.8369506 -1.6861072 1.1856073
-1.8358583 -1.6786974 1.1802164
-1.8416331 -1.7108690 1.2038721
-1.8399747 -1.7018744 1.1970743
-1.8345468 -1.6669258 1.1715405
-1.8384663 -1.6941194 1.1907075
-1.8435468 -1.7185830 1.2091762
-1.8319478 -1.6319495 1.1486213
-1.8337326 -1.6556984 1.1632700
-1.8335828 -1.5319974 1.0968132
-1.8325373 -1.5451653 1.1025954
-1.8317394 -1.6256722 1.1445429
-1.8331983 -1.6497593 1.1591614
-1.8326403 -1.6434128 1.1550587
-1.8344283 -1.6611501 1.1665688
-1.8322895 -1.5539437 1.1063944
-1.8411361 -1.7042594 1.1971554
-1.8386042 -1.6897726 1.1857654
-1.8380358 -1.4992857 1.0829169
-1.8376189 -1.6817457 1.1796816
-1.8401255 -1.6975093 1.1911307
-1.8362270 -1.5166960 1.0895898
-1.8422188 -1.7066244 1.1975233
-1.8316682 -1.6029748 1.1292409
-1.8323746 -1.6231593 1.1407540
-1.8371559 -1.5137674 1.0874606
-1.8361088 -1.6649914 1.1665820
-1.8355721 -1.6590748 1.1624459
-1.8388238 -1.5024181 1.0825176
-1.8344201 -1.6467699 1.1542536
-1.8338942 -1.5520931 1.1029634
-1.8327763 -1.5751108 1.1139963
-1.8380253 -1.6789442 1.1758554
-1.8401889 -1.6928563 1.1854731
-1.8415856 -1.7001283 1.1909739
-1.8453682 -1.7187336 1.2050264
-1.8330322 -1.5898765 1.1205494
-1.8342494 -1.6369581 1.1472258
-1.8338723 -1.6304909 1.1432538
-1.8362658 -1.5376409 1.0948263
-1.8341863 -1.6274610 1.1403179
-1.8431152 -1.7034361 1.1914868
-1.8417219 -1.6962991 1.1858481
-1.8469388 -1.7211748 1.2050238
-1.8378213 -1.6682078 1.1658550
-1.8397994 -1.6820104 1.1753032
-1.8374305 -1.6629598 1.1620365
-1.8362646 -1.6506914 1.1537935
-1.8356657 -1.5511998 1.0998236
-1.8352086 -1.5597365 1.1038158
-1.8346139 -1.5695631 1.1082676
-1.8339995 -1.6077663 1.1279363
-1.8348113 -1.5782697 1.1120109
-1.8444838 -1.7059640 1.1914229
-1.8409745 -1.5059353 1.0800735
-1.8417630 -1.6912686 1.1802446
-1.8459539 -1.7136129 1.1968469
-1.8433259 -1.6990777 1.1855344
-1.8359154 -1.6352201 1.1424791
-1.8395342 -1.5234739 1.0861865
-1.8396594 -1.6721079 1.1658205
-1.8415795 -1.6857373 1.1753986
-1.8366683 -1.5580095 1.1007117
-1.8360291 -1.5719734 1.1071246
-1.8361176 -1.6309683 1.1389597
-1.8379754 -1.6538956 1.1531319
-1.8458349 -1.7084503 1.1913981
-1.8374090 -1.6476317 1.1489406
-1.8360511 -1.5811189 1.1113200
-1.8356504 -1.5955380 1.1185230
-1.8395041 -1.6665723 1.1609948
-1.8432892 -1.6942503 1.1800422
-1.8473120 -1.7163075 1.1966279
-1.8405635 -1.5205716 1.0840794
-1.8448930 -1.7016687 1.1851305
-1.8361370 -1.6120831 1.1264066
-1.8470013 -1.7116128 1.1923314
-1.8378794 -1.6389850 1.1412960
-1.8373379 -1.5751937 1.1063049
-1.8371551 -1.6079821 1.1236970
-1.8487902 -1.7196861 1.1970864
-1.8390437 -1.6517188 1.1490574
-1.8410544 -1.6704614 1.1612941
-1.8462845 -1.7049345 1.1859560
-1.8377799 -1.5795366 1.1076458
-1.8374398 -1.5939380 1.1148851
-1.8451789 -1.6973383 1.1791490
-1.8380567 -1.5902348 1.1122233
-1.8476628 -1.7075194 1.1858367
-1.8383607 -1.6168622 1.1250971
-1.8396039 -1.5637995 1.0981421
-1.8415038 -1.6611265 1.1522580
-1.8427664 -1.6734995 1.1603998
-1.8466946 -1.7007383 1.1795730
-1.8397744 -1.6431539 1.1405771
-1.8408472 -1.6548838 1.1480415
-1.8427449 -1.6679093 1.1556406
-1.8461936 -1.6953432 1.1746109
-1.8504553 -1.7184470 1.1918208
-1.8396414 -1.5773680 1.1035467
-1.8399613 -1.6394526 1.1369960
-1.8394407 -1.6121133 1.1218100
-1.8400326 -1.5847700 1.1064448
-1.8481691 -1.7034717 1.1793096
-1.8407412 -1.5759786 1.1010426
-1.8403062 -1.5955970 1.1108887
-1.8401888 -1.5995637 1.1129380
-1.8401407 -1.6047587 1.1155671
-1.8435006 -1.6653555 1.1519116
-1.8439921 -1.6706158 1.1553821
-1.8475684 -1.6984014 1.1743384
-1.8517524 -1.7211474 1.1916018
-1.8416020 -1.6466373 1.1396576
-1.8409939 -1.5907449 1.1075939
-1.8409199 -1.6208319 1.1234484
-1.8412326 -1.6171057 1.1207374
-1.8422829 -1.6439922 1.1360105
-1.8417225 -1.6329169 1.1292684
-1.8531587 -1.7237934 1.1914251
-1.8456019 -1.6744809 1.1553654
-1.8433967 -1.6508220 1.1393377
-1.8443311 -1.5447335 1.0835808
-1.8452802 -1.6684675 1.1509468
-1.8421542 -1.6093925 1.1148165
-1.8438745 -1.5582581 1.0886650
-1.8479351 -1.6895324 1.1636096
-1.8547403 -1.7275220 1.1918056
-1.8428466 -1.5954753 1.1066958
-1.8434660 -1.5816105 1.0990806
-1.8431777 -1.6255292 1.1222588
-1.8471420 -1.6775899 1.1547308
-1.8538265 -1.7207833 1.1855049
-1.8437310 -1.6374342 1.1286407
-1.8444506 -1.6477298 1.1345098
-1.8435861 -1.6209508 1.1191699
-1.8452309 -1.6542924 1.1384300
-1.8466086 -1.6663012 1.1465338
-1.8472348 -1.6727144 1.1505801
-1.8561743 -1.7301575 1.1916366
-1.8496224 -1.6925758 1.1630483
-1.8552851 -1.7233233 1.1854222
-1.8440249 -1.6079186 1.1106207
-1.8526173 -1.7085729 1.1743071
-1.8443877 -1.6134340 1.1130091
-1.8489348 -1.5292777 1.0725868
-1.8448367 -1.5996228 1.1052982
-1.8451517 -1.6341939 1.1240401
-1.8543355 -1.7166777 1.1790335
-1.8472355 -1.5477608 1.0802101
-1.8565699 -1.7258055 1.1854057
-1.8464885 -1.6520601 1.1340710
-1.8453273 -1.6255128 1.1184412
-1.8465586 -1.5639016 1.0866777
-1.8484535 -1.6698327 1.1455602
-1.8491550 -1.6762136 1.1496452
-1.8514147 -1.6963588 1.1631212
-1.8523747 -1.7041577 1.1684346
-1.8461331 -1.6412145 1.1271384
-1.8471649 -1.6576300 1.1372486
-1.8463097 -1.5819464 1.0946019
-1.8486942 -1.5438116 1.0767904
-1.8481809 -1.5516624 1.0802544
-1.8511686 -1.6908631 1.1582512
-1.8545292 -1.7116548 1.1734240
-1.8558702 -1.7192526 1.1789139
-1.8579289 -1.7288629 1.1864206
-1.8465245 -1.6376337 1.1239081
-1.8463076 -1.6132084 1.1093563
-1.8467373 -1.6184004 1.1116526
-1.8504007 -1.5372418 1.0720070
-1.8486904 -1.5629240 1.0837627
-1.8476172 -1.5800321 1.0916467
-1.8471702 -1.6291676 1.1173843
-1.8510112 -1.6804991 1.1492283
-1.8544405 -1.7071583 1.1676179
-1.8573795 -1.7218423 1.1787823
-1.8489933 -1.6618019 1.1369457
-1.8526741 -1.6943813 1.1585339
-1.8485738 -1.6554220 1.1328790
-1.8516253 -1.6859177 1.1525514
-1.8496697 -1.5499269 1.0773393
-1.8583568 -1.7244357 1.1799858
-1.8602102 -1.7333760 1.1868251
-1.8515833 -1.5331187 1.0695012
-1.8485661 -1.6459062 1.1260045
-1.8485104 -1.6410812 1.1229949
-1.8484664 -1.5868727 1.0924464
-1.8596244 -1.7269030 1.1802441
-1.8544523 -1.6972445 1.1578384
-1.8507704 -1.6653023 1.1359945
-1.8524223 -1.5362840 1.0690143
-1.8491819 -1.6373347 1.1191774
-1.8536446 -1.6899163 1.1524228
-1.8585082 -1.7198076 1.1742852
-1.8503785 -1.6596101 1.1325600
-1.8489671 -1.6174337 1.1070232
-1.8519171 -1.5498197 1.0740657
-1.8509509 -1.5669072 1.0820236
-1.8576888 -1.7130154 1.1680243
-1.8490383 -1.6228591 1.1094299
-1.8503512 -1.6454686 1.1224749
-1.8611694 -1.7296349 1.1799774
-1.8598979 -1.7224261 1.1743976
-1.8542272 -1.5336273 1.0664161
-1.8543064 -1.6874088 1.1486471
-1.8560732 -1.7003224 1.1575908
-1.8502208 -1.5857653 1.0895297
-1.8507965 -1.6412923 1.1190542
-1.8525654 -1.6694945 1.1356663
-1.8537105 -1.5432301 1.0693406
-1.8533910 -1.5478067 1.0713143
-1.8540539 -1.6814821 1.1438241
-1.8558869 -1.6955784 1.1533034
-1.8576655 -1.7084883 1.1622472
-1.8591147 -1.7156494 1.1678559
-1.8521066 -1.6631770 1.1315438
-1.8528743 -1.5564314 1.0746217
-1.8615939 -1.7257521 1.1746191
-1.8629487 -1.7333400 1.1801137
-1.8509178 -1.5923620 1.0905395
-1.8559393 -1.6902820 1.1479287
-1.8512255 -1.6226911 1.1057778
-1.8524739 -1.6493772 1.1212804
-1.8551923 -1.5412188 1.0665989
-1.8554878 -1.6845471 1.1436059
-1.8592039 -1.7118535 1.1626974
-1.8573988 -1.6983862 1.1529663
-1.8512855 -1.6281598 1.1081432
-1.8538852 -1.6674677 1.1311212
-1.8545557 -1.5547782 1.0715540
-1.8545650 -1.6728931 1.1344489
-1.8565530 -1.5393385 1.0641759
-1.8574762 -1.6931842 1.1475029
-1.8653846 -1.7381192 1.1805067
-1.8530398 -1.5914446 1.0875548
-1.8558955 -1.5534869 1.0692043
-1.8535619 -1.5979340 1.0886162
-1.8547268 -1.6541449 1.1200331
-1.8556977 -1.6711221 1.1300161
-1.8564947 -1.6771110 1.1341064
-1.8555688 -1.5633348 1.0719409
-1.8538289 -1.6276858 1.1043537
-1.8535158 -1.6332828 1.1065922
-1.8625418 -1.7183987 1.1624689
-1.8582269 -1.5479552 1.0642344
-1.8662209 -1.7357253 1.1737522
-1.8574840 -1.5611264 1.0688849
-1.8550008 -1.6205784 1.0975119
-1.8640993 -1.7213163 1.1620276
-1.8577385 -1.6754162 1.1296003
-1.8583546 -1.6804921 1.1329411
-1.8554433 -1.6419191 1.1078763
-1.8678119 -1.7382715 1.1736482
-1.8580891 -1.5642711 1.0686832
-1.8561224 -1.6328147 1.1028205
-1.8561202 -1.6375941 1.1045990
-1.8610839 -1.6954294 1.1413063
-1.8601229 -1.6846164 1.1330037
-1.8615965 -1.5393347 1.0568271
-1.8576704 -1.6555994 1.1145285
-1.8699704 -1.7429121 1.1755211
-1.8597017 -1.6789081 1.1283292
-1.8572058 -1.6455043 1.1068815
-1.8656813 -1.7201217 1.1567288
-1.8669476 -1.7277675 1.1621809
-1.8579779 -1.5921547 1.0776573
-1.8580649 -1.6019694 1.0830096
-1.8575836 -1.6262586 1.0954681
-1.8630687 -1.6996609 1.1409477
-1.8618765 -1.6879648 1.1321531
-1.8606371 -1.5674461 1.0659355
-1.8595394 -1.6591411 1.1135754
-1.8670706 -1.7227727 1.1565450
-1.8683398 -1.7304175 1.1619987
-1.8698389 -1.7375531 1.1676312
-1.8585427 -1.6371563 1.1007321
-1.8583074 -1.6246396 1.0936324
-1.8616653 -1.6828250 1.1279224
-1.8684914 -1.7254095 1.1563750
-1.8698509 -1.7330036 1.1618679
-1.8631847 -1.6860427 1.1275476
-1.8638408 -1.6920107 1.1316534
-1.8599538 -1.5974676 1.0762908
-1.8602173 -1.6249447 1.0912894
-1.8602806 -1.6458479 1.1024662
-1.8721705 -1.7430297 1.1684490
-1.8603885 -1.6311240 1.0930340
-1.8606295 -1.6423569 1.0995158
-1.8653644 -1.7003291 1.1361689
-1.8662119 -1.7066405 1.1403018
-1.8622922 -1.6595947 1.1089854
-1.8679748 -1.7147231 1.1450449
-1.8707867 -1.7310608 1.1572935
-1.8648183 -1.6891859 1.1268925
-1.8657592 -1.6955229 1.1306879
-1.8618989 -1.6292912 1.0907658
-1.8676387 -1.7092712 1.1401342
-1.8734047 -1.7402933 1.1635482
-1.8743192 -1.7465267 1.1677014
-1.8620605 -1.6354777 1.0925044
-1.8624770 -1.6505919 1.1012232
-1.8639257 -1.6719942 1.1142292
-1.8672726 -1.7038288 1.1352100
-1.8693990 -1.7173567 1.1448759
-1.8753975 -1.7489898 1.1679789
-1.8726555 -1.7340608 1.1567726
-1.8748098 -1.7436083 1.1640583
-1.8628858 -1.6325636 1.0903528
-1.8666802 -1.6930671 1.1265044
-1.8676849 -1.6996594 1.1304193
-1.8644194 -1.6643792 1.1077318
-1.8720852 -1.7276394 1.1501579
-1.8655308 -1.6753417 1.1134221
-1.8745152 -1.7377544 1.1569037
-1.8735241 -1.7310280 1.1505908
-1.8769304 -1.7470894 1.1630726
-1.8684355 -1.6965199 1.1256317
-1.8694355 -1.7028095 1.1294397
-1.8675647 -1.6854352 1.1175568
-1.8705964 -1.7107316 1.1346451
-1.8718397 -1.7179913 1.1401684
-1.8656320 -1.6381863 1.0884046
-1.8668448 -1.6695219 1.1065903
-1.8749748 -1.7336753 1.1504093
-1.8785621 -1.7499563 1.1626774
-1.8709404 -1.7067060 1.1297074
-1.8677854 -1.6756738 1.1092746
-1.8719296 -1.7134086 1.1344364
-1.8732117 -1.7206514 1.1399750
-1.8702975 -1.7005324 1.1254469
-1.8693761 -1.6888226 1.1167271
-1.8672002 -1.6597078 1.0983796
-1.8751856 -1.7298202 1.1453022
-1.8736096 -1.7171088 1.1348705
-1.8724604 -1.7097394 1.1291537
-1.8688263 -1.6730200 1.1053061
-1.8693264 -1.6794784 1.1092440
-1.8719276 -1.7038033 1.1247022
-1.8766041 -1.7324463 1.1451408
-1.8675805 -1.6454774 1.0880809
-1.8680294 -1.6571263 1.0946935
-1.8688253 -1.6671900 1.1008022
-1.8690900 -1.6639825 1.0979805
-1.8713632 -1.6927670 1.1162551
-1.8750670 -1.7197246 1.1347139
-1.8740347 -1.7126859 1.1287049
-1.8705236 -1.6773587 1.1051941
-1.8709523 -1.6826364 1.1086298
-1.8816422 -1.7518129 1.1581278
-1.8781034 -1.7350662 1.1449829
-1.8736386 -1.7076343 1.1246927
-1.8697639 -1.6605024 1.0938776
-1.8705918 -1.6705231 1.0999716
-1.8694738 -1.6500939 1.0874137
-1.8755858 -1.7162507 1.1289582
-1.8707867 -1.6671149 1.0969634
-1.8727597 -1.6898112 1.1113236
-1.8795669 -1.7384544 1.1454148
-1.8830638 -1.7544857 1.1579218
-1.8753369 -1.7108245 1.1240227
-1.8717998 -1.6739915 1.1002345
-1.8715608 -1.6643937 1.0934012
-1.8770813 -1.7189977 1.1286805
-1.8709343 -1.6049474 1.0605318
-1.8745987 -1.7001504 1.1156126
-1.8797358 -1.7338354 1.1397171
-1.8742013 -1.6937467 1.1115805
-1.8715189 -1.6536117 1.0860391
-1.8714413 -1.6105193 1.0624552
-1.8715046 -1.6491368 1.0831671
-1.8719463 -1.6603173 1.0897863
-1.8728867 -1.6715905 1.0963908
-1.8733339 -1.6773841 1.0997480
-1.8782686 -1.7213884 1.1287477
-1.8716876 -1.6351285 1.0742986
-1.8810285 -1.7365351 1.1394895
-1.8773314 -1.7148902 1.1235008
-1.8793212 -1.7242149 1.1297225
-1.8761217 -1.6966969 1.1107778
-1.8735678 -1.6680584 1.0923339
-1.8764228 -1.7034301 1.1144799
-1.8731065 -1.6578721 1.0860071
-1.8731018 -1.6532046 1.0829278
-1.8737749 -1.6645796 1.0893931
-1.8749977 -1.6814066 1.0995733
-1.8737839 -1.6152054 1.0612723
-1.8750106 -1.6753446 1.0948672
-1.8841669 -1.7484578 1.1445349
-1.8808853 -1.7270161 1.1293904
-1.8796159 -1.7187065 1.1225172
-1.8744517 -1.6108839 1.0580059
-1.8782905 -1.7067612 1.1137057
-1.8864906 -1.7578413 1.1506627
-1.8748713 -1.6613503 1.0850966
-1.8749408 -1.6567364 1.0819129
-1.8855536 -1.7511381 1.1443263
-1.8759653 -1.6682100 1.0879409
-1.8828331 -1.7309088 1.1293436
-1.8812717 -1.7216205 1.1220749
-1.8880378 -1.7603477 1.1506039
-1.8790506 -1.5661406 1.0362665
-1.8775574 -1.5747748 1.0391398
-1.8753813 -1.6378010 1.0702712
-1.8792990 -1.7036605 1.1101337
-1.8848414 -1.7442722 1.1381342
-1.8828237 -1.7290983 1.1271024
-1.8762988 -1.6099954 1.0549057
-1.8761537 -1.6152181 1.0574864
-1.8872308 -1.7544127 1.1448628
-1.8767766 -1.6657377 1.0845841
-1.8827616 -1.7248739 1.1223352
-1.8862754 -1.7476682 1.1385659
-1.8764134 -1.6509005 1.0751786
-1.8769695 -1.6611383 1.0810150
-1.8781289 -1.6727966 1.0873295
-1.8815144 -1.7137053 1.1130876
-1.8812157 -1.7072349 1.1091281
-1.8850662 -1.7349218 1.1278719
-1.8877007 -1.7502292 1.1384667
-1.8843636 -1.7279754 1.1220298
-1.8849481 -1.7315826 1.1245839
-1.8784917 -1.6191777 1.0557985
-1.8789539 -1.6694657 1.0830924
-1.8844600 -1.7249509 1.1184661
-1.8890955 -1.7527129 1.1384407
-1.8790948 -1.6651310 1.0797052
-1.8834722 -1.7174035 1.1128922
-1.8791106 -1.6155990 1.0530023
-1.8787193 -1.6548681 1.0734655
-1.8877668 -1.7457544 1.1326282
-1.8829747 -1.7112048 1.1086787
-1.8913626 -1.7623225 1.1456831
-1.8859098 -1.7308308 1.1216495
-1.8823934 -1.5728841 1.0329258
-1.8870066 -1.7383236 1.1266770
-1.8818350 -1.5809280 1.0361366
-1.8830714 -1.5698073 1.0314303
-1.8904581 -1.7558445 1.1393894
-1.8925920 -1.7648241 1.1459074
-1.8825859 -1.5788100 1.0343567
-1.8818100 -1.6953129 1.0954394
-1.8851229 -1.7205534 1.1125742
-1.8860986 -1.7279499 1.1179456
-1.8844826 -1.7145128 1.1082260
-1.8883765 -1.7421453 1.1270024
-1.8897921 -1.7494299 1.1325091
-1.8918103 -1.7582489 1.1394306
-1.8875818 -1.7344709 1.1215393
-1.8812950 -1.6697296 1.0786379
-1.8804347 -1.6484604 1.0655926
-1.8820291 -1.6855561 1.0871604
-1.8913973 -1.7521433 1.1325099
-1.8869121 -1.7242533 1.1123843
-1.8862025 -1.7183144 1.1082403
-1.8898564 -1.7449461 1.1266755
-1.8836724 -1.6983947 1.0945161
-1.8845518 -1.7046866 1.0986864
-1.8889382 -1.7375495 1.1212608
-1.8927383 -1.7546290 1.1324849
-1.8837028 -1.6896680 1.0868937
-1.8856745 -1.5797557 1.0299550
-1.8825376 -1.6573435 1.0679679
-1.8833105 -1.6743065 1.0779545
-1.8843967 -1.6958517 1.0907700
-1.8884943 -1.7273572 1.1121037
-1.8912850 -1.7476458 1.1264470
-1.8877884 -1.7213560 1.1076801
-1.8895499 -1.7347906 1.1171423
-1.8870784 -1.7152496 1.1033818
-1.8863264 -1.5768535 1.0277066
-1.8835798 -1.6686247 1.0733495
-1.8863428 -1.7078054 1.0977312
-1.8939993 -1.7576170 1.1333208
-1.8857614 -1.5857028 1.0313265
-1.8926987 -1.7505659 1.1273323
-1.8909071 -1.7424379 1.1202711
-1.8835132 -1.6539565 1.0638230
-1.8970926 -1.7685070 1.1406248
-1.8909274 -1.7378616 1.1168576
-1.8951392 -1.7599718 1.1334376
-1.8862353 -1.6991384 1.0900351
-1.8855621 -1.6928068 1.0859021
-1.8894663 -1.7244682 1.1070893
-1.8887935 -1.7184266 1.1026970
-1.8848880 -1.6612933 1.0662804
-1.8950345 -1.7560886 1.1283767
-1.8927798 -1.7455522 1.1196257
-1.8886218 -1.5768961 1.0238697
-1.8850725 -1.6531947 1.0605935
-1.8858708 -1.6733414 1.0721750
-1.8861862 -1.6838189 1.0781913
-1.8865296 -1.6903486 1.0820989
-1.8870902 -1.6960273 1.0855677
-1.8883854 -1.7079458 1.0937655
-1.8879508 -1.7022999 1.0893667
-1.8903837 -1.7222032 1.1027672
-1.8952584 -1.7545594 1.1256807
-1.8912650 -1.7285002 1.1068852
-1.8859810 -1.6259056 1.0452451
-1.8941782 -1.7482735 1.1193743
-1.8965833 -1.7588819 1.1280541
-1.8867817 -1.6217301 1.0425357
-1.8883554 -1.6937751 1.0812332
-1.8879105 -1.6881356 1.0777307
-1.8898756 -1.5838484 1.0241733
-1.8893317 -1.5924042 1.0281106
-1.8889350 -1.6998737 1.0851814
-1.8903040 -1.7114359 1.0928244
-1.8912011 -1.7184905 1.0975516
-1.8957749 -1.7514989 1.1202188
-1.8979585 -1.7617089 1.1279613
-1.8908925 -1.5769432 1.0200178
-1.8932167 -1.7319491 1.1056593
-1.8998694 -1.7692281 1.1332068
-1.8970032 -1.7538705 1.1203033
-1.8884693 -1.6738417 1.0674970
-1.8914439 -1.5815705 1.0207669
-1.8906537 -1.7031518 1.0844465
-1.9010858 -1.7716703 1.1332376
-1.8995555 -1.7644501 1.1274540
-1.8887950 -1.6261875 1.0408198
-1.8898529 -1.6917504 1.0766956
-1.8902829 -1.6978120 1.0806624
-1.8965640 -1.7493656 1.1153223
-1.8983597 -1.7562617 1.1201084
-1.8892016 -1.6319229 1.0425357
-1.8952423 -1.7361613 1.1053221
-1.8902705 -1.6774138 1.0665143
-1.8905914 -1.6878919 1.0725355
-1.8996517 -1.7594488 1.1207556
-1.9015985 -1.7685972 1.1273788
-1.8984483 -1.7523351 1.1148160
-1.8905506 -1.6254423 1.0375335
-1.8920533 -1.7012602 1.0797680
-1.8942435 -1.7187110 1.0915962
-1.8966620 -1.7390089 1.1049462
-1.8918113 -1.6961241 1.0762032
-1.8910787 -1.6748409 1.0628125
-1.8909857 -1.6310916 1.0393487
-1.9011980 -1.7622154 1.1204606
-1.8943011 -1.5835444 1.0168604
-1.8998119 -1.7549329 1.1146867
-1.9030100 -1.7710915 1.1271029
-1.8922262 -1.6921190 1.0721548
-1.8979000 -1.7427092 1.1053936
-1.9021604 -1.7645270 1.1209195
-1.9041491 -1.7739590 1.1283109
-1.8918361 -1.6375790 1.0405191
-1.8961189 -1.7229910 1.0911900
-1.9011430 -1.7582090 1.1155052
-1.8938484 -1.6997656 1.0747840
-1.8928256 -1.6300141 1.0357794
-1.8954050 -1.5903093 1.0173112
-1.8939683 -1.6956128 1.0712196
-1.8933578 -1.6786590 1.0612546
-1.8935644 -1.6263528 1.0331076
-1.9024792 -1.7607265 1.1154511
-1.9044230 -1.7687123 1.1205282
-1.8935313 -1.6366836 1.0373737
-1.8997051 -1.7402170 1.0996978
-1.8940008 -1.6421357 1.0387557
-1.8958408 -1.7042122 1.0742249
-1.9025781 -1.7560250 1.1098230
-1.9045676 -1.7660307 1.1167094
-1.8958402 -1.6998632 1.0707900
-1.9059645 -1.7714595 1.1202445
-1.8949663 -1.6876272 1.0626497
-1.8998087 -1.7364138 1.0945451
-1.8976478 -1.5900045 1.0136988
-1.8951746 -1.6834627 1.0602826
-1.9011793 -1.7433596 1.0990442
-1.8952747 -1.6353459 1.0339347
-1.8957045 -1.6788401 1.0572768
-1.9040512 -1.7594266 1.1102511
-1.9071989 -1.7743787 1.1211418
-1.8961738 -1.6320165 1.0310771
-1.9062679 -1.7689342 1.1162720
-1.8983230 -1.5967746 1.0145115
-1.9015041 -1.7395205 1.0939433
-1.8962977 -1.6416249 1.0348872
-1.8965508 -1.6920013 1.0620812
-1.9029233 -1.7471675 1.0990886
-1.8979107 -1.7036624 1.0696361
-1.9089681 -1.7785294 1.1221851
-1.8971752 -1.6875829 1.0588843
-1.8979254 -1.6987351 1.0655327
-1.8978026 -1.6833942 1.0561858
-1.8993297 -1.7109054 1.0722191
-1.8997857 -1.7173899 1.0761847
-1.9031757 -1.7432957 1.0939987
-1.9070325 -1.7650152 1.1098815
-1.9083394 -1.7722504 1.1154342
-1.9102546 -1.7809582 1.1222223
-1.9005652 -1.5964823 1.0110294
-1.9013895 -1.5886776 1.0076473
-1.8984484 -1.6315162 1.0272011
-1.8980217 -1.6407520 1.0317252
-1.9096105 -1.7752072 1.1162934
-1.8987733 -1.6376832 1.0290400
-1.8980835 -1.6699015 1.0456152
-1.9002043 -1.7083038 1.0685509
-1.9069857 -1.7609032 1.1047520
-1.8998317 -1.7020794 1.0643930
-1.8985141 -1.6471515 1.0333703
-1.9086704 -1.7684349 1.1100191
-1.9010735 -1.7152212 1.0721380
-1.8991839 -1.6921531 1.0577693
-1.9012422 -1.6031812 1.0119262
-1.9041164 -1.7405418 1.0888551
-1.9109231 -1.7777275 1.1162409
-1.9018827 -1.7218661 1.0756102
-1.8998790 -1.6874653 1.0547607
-1.9083804 -1.7635524 1.1045719
-1.9100092 -1.7711684 1.1100278
-1.9016085 -1.7061055 1.0641722
-1.8999455 -1.6735435 1.0445688
-1.9056658 -1.7436935 1.0885140
-1.9007914 -1.6369189 1.0253598
-1.9013042 -1.6958725 1.0566827
-1.9017447 -1.7019673 1.0605878
-1.9031152 -1.7186971 1.0708831
-1.9113305 -1.7736995 1.1099620
-1.9032567 -1.6026203 1.0086410
-1.9008101 -1.6524129 1.0316673
-1.9016542 -1.6923175 1.0538295
-1.9015593 -1.6425874 1.0266006
-1.9041269 -1.7255711 1.0741472
-1.9058730 -1.7392657 1.0836311
-1.9079286 -1.7528286 1.0932670
-1.9093614 -1.7597460 1.0978084
-1.9049256 -1.5956752 1.0041079
-1.9031827 -1.6167399 1.0132250
-1.9038898 -1.7156749 1.0671831
-1.9075161 -1.7474093 1.0883217
-1.9128605 -1.7770725 1.1104146
-1.9018544 -1.6779982 1.0439906
-1.9036489 -1.7062086 1.0602262
-1.9057767 -1.5927326 1.0019645
-1.9021378 -1.6735145 1.0407732
-1.9048950 -1.7225563 1.0704500
-1.9092867 -1.7554944 1.0930692
-1.9120013 -1.7703036 1.1041335
-1.9108350 -1.7631446 1.0985063
-1.9043332 -1.6093558 1.0089617
-1.9075555 -1.7423785 1.0830320
-1.9035272 -1.7002366 1.0558478
-1.9142141 -1.7796418 1.1103128
-1.9031968 -1.6417389 1.0233847
-1.9038762 -1.6960050 1.0523884
-1.9032754 -1.6511758 1.0273651
-1.9133390 -1.7729066 1.1039984
-1.9095678 -1.7508282 1.0874261
-1.9057722 -1.7192247 1.0662125
-1.9121961 -1.7657420 1.0983743
-1.9066055 -1.7260128 1.0695528
-1.9040073 -1.6476283 1.0245712
-1.9038397 -1.6574525 1.0291566
-1.9037513 -1.6712399 1.0365088
-1.9040258 -1.6817292 1.0424953
-1.9055886 -1.7097372 1.0592798
-1.9073313 -1.7325199 1.0735184
-1.9092477 -1.7461445 1.0830889
-1.9146157 -1.7754585 1.1039142
-1.9043741 -1.6781461 1.0396564
-1.9109100 -1.7534993 1.0872200
-1.9135464 -1.7683391 1.0982435
-1.9059286 -1.7049078 1.0547408
-1.9057351 -1.7003704 1.0518921
-1.9125876 -1.7620241 1.0928571
-1.9061883 -1.6227886 1.0103726
-1.9076324 -1.7234832 1.0658262
-1.9086996 -1.7351760 1.0733207
-1.9159509 -1.7787319 1.1047365
-1.9082252 -1.7300002 1.0694197
-1.9087697 -1.5993716 0.9991526
-1.9073673 -1.6158530 1.0063198
-1.9057713 -1.6474108 1.0213321
-1.9055621 -1.6565907 1.0259888
-1.9102643 -1.7433548 1.0779730
-1.9123706 -1.7568954 1.0876352
-1.9056359 -1.6757243 1.0358938
-1.9140641 -1.7647604 1.0925904
-1.9172719 -1.7814886 1.1047379
-1.9059476 -1.6621678 1.0278692
-1.9081439 -1.6129276 1.0041315
-1.9075303 -1.6208063 1.0075173
-1.9064639 -1.6339756 1.0132847
-1.9062280 -1.6529975 1.0232237
-1.9065873 -1.6819612 1.0380829
-1.9075847 -1.7039672 1.0508119
-1.9100258 -1.7333972 1.0689120
-1.9080679 -1.7088001 1.0534585
-1.9093776 -1.7270554 1.0648050
-1.9125742 -1.7522666 1.0819609
-1.9137213 -1.7595643 1.0874344
-1.9119766 -1.7471121 1.0780393
-1.9154856 -1.7674715 1.0923498
-1.9071309 -1.6740184 1.0323033
-1.9077452 -1.6794604 1.0343790
-1.9087331 -1.6277684 1.0077888
-1.9077530 -1.6605939 1.0242081
-1.9121190 -1.7420347 1.0728006
-1.9153947 -1.7632677 1.0878643
-1.9140965 -1.7557059 1.0823299
-1.9084440 -1.6517156 1.0188922
-1.9169865 -1.7709614 1.0926886
-1.9082712 -1.6661632 1.0261370
-1.9084508 -1.6865271 1.0373808
-1.9112676 -1.7305631 1.0638518
-1.9119375 -1.7365104 1.0679616
-1.9137195 -1.7501967 1.0774693
-1.9201029 -1.7876157 1.1049141
-1.9088554 -1.6391861 1.0116616
-1.9097337 -1.7084559 1.0498516
-1.9113688 -1.6093240 0.9976988
-1.9099818 -1.6264954 1.0053854
-1.9138185 -1.7451407 1.0722127
-1.9156105 -1.7584557 1.0817515
-1.9171129 -1.7661910 1.0871296
-1.9125647 -1.7339653 1.0642196
-1.9184426 -1.7736535 1.0924649
-1.9216543 -1.7901844 1.1047987
-1.9094664 -1.6788217 1.0310235
-1.9134635 -1.7401288 1.0681453
-1.9203505 -1.7828732 1.0990418
-1.9097466 -1.6841410 1.0335874
-1.9116887 -1.6199234 1.0005990
-1.9104928 -1.6376243 1.0084422
-1.9102424 -1.6952683 1.0390411
-1.9156963 -1.7536507 1.0765460
-1.9101351 -1.6659081 1.0229562
-1.9108666 -1.6333384 1.0062012
-1.9185350 -1.7689837 1.0868107
-1.9106851 -1.6570463 1.0175891
-1.9105046 -1.6760613 1.0275663
-1.9125089 -1.7236032 1.0551998
-1.9155364 -1.7488926 1.0722790
-1.9173969 -1.7617647 1.0812580
-1.9217139 -1.7856578 1.0990143
-1.9120421 -1.7127314 1.0482737
-1.9150142 -1.7431236 1.0676639
-1.9113916 -1.6436035 1.0095501
-1.9143958 -1.7371121 1.0632385
-1.9171676 -1.7570717 1.0769311
-1.9136476 -1.6147255 0.9958089
-1.9187872 -1.7650644 1.0817644
-1.9116853 -1.6831444 1.0294477
-1.9129225 -1.6274573 1.0009278
-1.9124389 -1.6321934 1.0032597
-1.9143475 -1.7322928 1.0590149
-1.9202115 -1.7727687 1.0871592
-1.9231988 -1.7890116 1.0994841
-1.9141076 -1.7266907 1.0545956
-1.9123633 -1.6997082 1.0381088
-1.9224356 -1.7821937 1.0932448
-1.9167187 -1.7469009 1.0677056
-1.9186322 -1.7598791 1.0765953
-1.9127933 -1.6427753 1.0067328
-1.9200562 -1.7676473 1.0816449
-1.9132915 -1.6387502 1.0043732
-1.9127399 -1.6709352 1.0210316
-1.9128504 -1.6805288 1.0258735
-1.9135725 -1.7061020 1.0406005
-1.9215797 -1.7754289 1.0869670
-1.9246340 -1.7916726 1.0992900
-1.9158876 -1.7355261 1.0586473
-1.9142902 -1.7173996 1.0471447
-1.9144357 -1.6261433 0.9981387
-1.9157540 -1.6133826 0.9920170
-1.9136277 -1.6488459 1.0083415
-1.9157489 -1.7305388 1.0545923
-1.9189062 -1.7557718 1.0717347
-1.9238472 -1.7848596 1.0930482
-1.9182916 -1.7499523 1.0671674
-1.9137562 -1.6927904 1.0311001
-1.9214695 -1.7704473 1.0813191
-1.9158765 -1.6196168 0.9937444
-1.9144499 -1.7035025 1.0369372
-1.9229466 -1.7780895 1.0867737
-1.9260522 -1.7942771 1.0991500
-1.9139339 -1.6880266 1.0280677
-1.9178994 -1.7442195 1.0624868
-1.9149808 -1.6372932 1.0010572
-1.9176813 -1.7394497 1.0585801
-1.9153919 -1.7103744 1.0401939
-1.9202373 -1.7584362 1.0715335
-1.9153953 -1.6331401 0.9988088
-1.9147448 -1.7000483 1.0339718
-1.9253843 -1.7882031 1.0935243
-1.9218604 -1.7664039 1.0763900
-1.9162021 -1.7172000 1.0434801
-1.9169745 -1.7275651 1.0496668
-1.9152781 -1.6479980 1.0051319
-1.9149748 -1.6801067 1.0219425
-1.9231662 -1.7742347 1.0816729
-1.9199573 -1.7530427 1.0665641
-1.9265329 -1.7904999 1.0936862
-1.9195087 -1.7471966 1.0620235
-1.9181693 -1.6134003 0.9882610
-1.9157113 -1.6966774 1.0298167
-1.9216252 -1.7611585 1.0712785
-1.9231201 -1.7692075 1.0763580
-1.9195077 -1.7425401 1.0576545
-1.9160398 -1.6930329 1.0270443
-1.9171890 -1.6322398 0.9956851
-1.9162610 -1.6539679 1.0062942
-1.9158635 -1.6637353 1.0108697
-1.9172294 -1.7139491 1.0392005
-1.9245514 -1.7769346 1.0814398
-1.9278835 -1.7931492 1.0937765
-1.9216244 -1.7567247 1.0667263
-1.9185853 -1.7314402 1.0495888
-1.9230162 -1.7646095 1.0719654
-1.9194693 -1.6121174 0.9858864
-1.9184276 -1.7254403 1.0452233
-1.9171587 -1.7040069 1.0322875
-1.9211188 -1.7509668 1.0620704
-1.9189316 -1.6196959 0.9890803
-1.9244297 -1.7718455 1.0761845
-1.9180126 -1.6387968 0.9967808
-1.9177290 -1.6428040 0.9987267
-1.9171229 -1.6853663 1.0206718
-1.9180844 -1.7108857 1.0355352
-1.9186764 -1.7212594 1.0417000
-1.9210473 -1.7457399 1.0573040
-1.9273952 -1.7866933 1.0869163
-1.9292438 -1.7957206 1.0936698
-1.9259925 -1.7796446 1.0811984
-1.9232223 -1.7596865 1.0662447
-1.9206996 -1.7404569 1.0531566
-1.9181269 -1.6528816 1.0027339
-1.9202732 -1.7346929 1.0488739
-1.9226584 -1.7540467 1.0618206
-1.9182066 -1.6969210 1.0253872
-1.9290073 -1.7899987 1.0874284
-1.9180373 -1.6677406 1.0090747
-1.9250210 -1.7679667 1.0708034
-1.9275158 -1.7830016 1.0816591
-1.9247011 -1.7631758 1.0665637
-1.9199429 -1.7151421 1.0351497
-1.9198043 -1.6371969 0.9931430
-1.9195838 -1.7086501 1.0312052
-1.9222827 -1.7437686 1.0527078
-1.9244518 -1.7577003 1.0616698
-1.9263431 -1.7706194 1.0706150
-1.9221522 -1.7388385 1.0485979
-1.9304520 -1.7926496 1.0872449
-1.9276137 -1.7783193 1.0760262
-1.9214892 -1.7324838 1.0444948
-1.9290971 -1.7858556 1.0812881
-1.9203344 -1.6431948 0.9946181
-1.9261448 -1.7658965 1.0663113
-1.9202123 -1.7014529 1.0247490
-1.9225910 -1.6181475 0.9830984
-1.9219998 -1.6260170 0.9865081
-1.9202306 -1.6576236 1.0014120
-1.9277576 -1.7739384 1.0711030
-1.9204146 -1.6971769 1.0213041
-1.9260167 -1.7607707 1.0614236
-1.9217847 -1.7187151 1.0341601
-1.9242244 -1.7476376 1.0523348
-1.9291979 -1.7818617 1.0763030
-1.9230675 -1.7358390 1.0440168
-1.9309007 -1.7895360 1.0814354
-1.9213109 -1.6687513 1.0052981
-1.9227492 -1.7295509 1.0395267
-1.9274697 -1.7685903 1.0660860
-1.9293473 -1.7770313 1.0708147
-1.9224176 -1.6429307 0.9910348
-1.9306809 -1.7846412 1.0760123
-1.9276300 -1.7636706 1.0606891
-1.9226854 -1.6483219 0.9930731
-1.9323816 -1.7922723 1.0811689
-1.9253611 -1.7450297 1.0474152
-1.9259631 -1.7510109 1.0514978
-1.9290579 -1.7723371 1.0664902
-1.9247462 -1.7387150 1.0432807
-1.9242296 -1.7335224 1.0397433
-1.9225350 -1.7018055 1.0201748
-1.9317988 -1.7869745 1.0761204
-1.9228681 -1.6724027 1.0041824
-1.9306911 -1.7797245 1.0705885
-1.9336962 -1.7948138 1.0810946
-1.9308690 -1.7755228 1.0658141
-1.9332476 -1.7898704 1.0759970
-1.9265704 -1.7427999 1.0430609
-1.9321429 -1.7831112 1.0710161
-1.9273032 -1.7490007 1.0469366
-1.9348839 -1.7972908 1.0813465
-1.9260745 -1.7368068 1.0386176
-1.9249117 -1.6537416 0.9916753
-1.9252507 -1.6487586 0.9889006
-1.9361929 -1.8003343 1.0821255
-1.9292709 -1.7579196 1.0509253
-1.9348690 -1.7934050 1.0762857
-1.9325223 -1.7783871 1.0651282
-1.9337248 -1.7859818 1.0706198
-1.9282613 -1.7460402 1.0423549
-1.9291179 -1.7523823 1.0460993
-1.9372922 -1.8026972 1.0824846
-1.9280913 -1.7410612 1.0382469
-1.9337425 -1.7817036 1.0659176
-1.9259554 -1.7038332 1.0146563
-1.9261188 -1.7143592 1.0205899
-1.9362971 -1.7960936 1.0760661
-1.9307349 -1.7610834 1.0506096
-1.9353806 -1.7889846 1.0701127
-1.9279644 -1.7322631 1.0306863
-1.9334386 -1.7764329 1.0608312
-1.9299523 -1.7498770 1.0423287
-1.9350472 -1.7843109 1.0657761
-1.9376209 -1.7986447 1.0759815
-1.9267961 -1.7000207 1.0104503
-1.9298326 -1.7443084 1.0375396
-1.9280984 -1.7220252 1.0228749
-1.9324687 -1.7647924 1.0503818
-1.9282292 -1.6545374 0.9863619
-1.9280031 -1.6590831 0.9883706
-1.9287854 -1.7284704 1.0264653
-1.9349060 -1.7793546 1.0603897
-1.9315719 -1.7530354 1.0416575
-1.9391322 -1.8018632 1.0765833
-1.9364280 -1.7870489 1.0655109
-1.9281196 -1.7084926 1.0135076
-1.9310569 -1.7469051 1.0373883
-1.9286954 -1.7189723 1.0195613
-1.9297086 -1.6485752 0.9814632
-1.9303590 -1.7361919 1.0290220
-1.9331478 -1.7615881 1.0459770
-1.9340021 -1.7679537 1.0500686
-1.9285587 -1.7044068 1.0099133
-1.9403612 -1.8043774 1.0767944
-1.9363788 -1.7821340 1.0601001
-1.9391229 -1.7974188 1.0709849
-1.9300815 -1.7260421 1.0222983
-1.9306513 -1.7327422 1.0260661
-1.9331215 -1.7559980 1.0412129
-1.9355687 -1.7760610 1.0547751
-1.9381148 -1.7906799 1.0657088
-1.9327292 -1.7508070 1.0373364
-1.9304897 -1.7220708 1.0185835
-1.9417306 -1.8068287 1.0768001
-1.9377525 -1.7855974 1.0607477
-1.9407186 -1.8008372 1.0713866
-1.9303066 -1.7123107 1.0119260
-1.9350577 -1.7656647 1.0457698
-1.9305131 -1.6646863 0.9863667
-1.9357659 -1.7709497 1.0492333
-1.9308572 -1.6594889 0.9838239
-1.9316306 -1.7293515 1.0219132
-1.9369174 -1.7787285 1.0545696
-1.9395807 -1.7935563 1.0656068
-1.9305165 -1.7081414 1.0087900
-1.9431459 -1.8099766 1.0777225
-1.9333936 -1.7472091 1.0329307
-1.9307472 -1.6748899 0.9901848
-1.9304380 -1.6939334 1.0000776
-1.9314003 -1.7194540 1.0149381
-1.9343354 -1.7539362 1.0366931
-1.9391192 -1.7882436 1.0605683
-1.9326484 -1.7363343 1.0250728
-1.9320153 -1.7253152 1.0182625
-1.9310182 -1.6896358 0.9967493
-1.9312432 -1.7048148 1.0053461
-1.9442984 -1.8122767 1.0778883
-1.9410071 -1.7962149 1.0654143
-1.9368764 -1.7687646 1.0448376
-1.9322558 -1.7167588 1.0113631
-1.9326395 -1.7221582 1.0146640
-1.9334354 -1.7332060 1.0214738
-1.9350157 -1.7513619 1.0329790
-1.9404992 -1.7909095 1.0603711
-1.9329653 -1.6547594 0.9785850
-1.9433486 -1.8057571 1.0713883
-1.9325422 -1.7124675 1.0079493
-1.9361400 -1.6173905 0.9609793
-1.9323344 -1.7021434 1.0018031
-1.9424534 -1.7996009 1.0658512
-1.9338098 -1.7291684 1.0178189
-1.9332087 -1.6653763 0.9820868
-1.9329631 -1.6701838 0.9844598
-1.9348622 -1.7398750 1.0237122
-1.9358892 -1.6237008 0.9624636
-1.9340907 -1.6526410 0.9757837
-1.9356397 -1.7461304 1.0275690
-1.9448104 -1.8089967 1.0719747
-1.9328392 -1.6979003 0.9983912
-1.9385731 -1.7725298 1.0449229
-1.9329783 -1.6797804 0.9887526
-1.9330896 -1.6940367 0.9958039
-1.9438146 -1.8021991 1.0657205
-1.9353212 -1.7367162 1.0205474
-1.9350635 -1.6437768 0.9705426
-1.9334089 -1.6844695 0.9903034
-1.9342233 -1.7203522 1.0103717
-1.9426703 -1.7949543 1.0601744
-1.9462274 -1.8116030 1.0718357
-1.9355831 -1.7325382 1.0170186
-1.9370047 -1.7499958 1.0278785
-1.9405651 -1.7805311 1.0484529
-1.9418313 -1.7881800 1.0539053
-1.9345488 -1.7162073 1.0068247
-1.9342730 -1.7059155 1.0006448
-1.9394304 -1.7695135 1.0403410
-1.9401756 -1.7755476 1.0443887
-1.9345595 -1.6884224 0.9905064
-1.9344789 -1.6931174 0.9930931
-1.9414320 -1.7835402 1.0495340
-1.9452967 -1.8048736 1.0655124
-1.9441926 -1.7977742 1.0598277
-1.9351286 -1.7130027 1.0036530
-1.9382124 -1.6265241 0.9605104
-1.9349759 -1.6977372 0.9947219
-1.9371468 -1.7409537 1.0201771
-1.9476506 -1.8142458 1.0716616
-1.9386594 -1.6230677 0.9588829
-1.9360474 -1.6611870 0.9760110
-1.9351946 -1.6796601 0.9850587
-1.9351374 -1.6848584 0.9876876
-1.9351353 -1.7025779 0.9972274
-1.9432552 -1.7908326 1.0537171
-1.9354283 -1.6749789 0.9825259
-1.9358175 -1.6705315 0.9799763
-1.9416248 -1.7785182 1.0442137
-1.9395185 -1.6201291 0.9567424
-1.9372763 -1.6490281 0.9693248
-1.9364671 -1.7205284 1.0063818
-1.9456643 -1.8004497 1.0596175
-1.9411837 -1.7727851 1.0395664
-1.9370569 -1.6584227 0.9732331
-1.9362790 -1.7102215 0.9998103
-1.9447749 -1.7941654 1.0541976
-1.9392788 -1.6296741 0.9598549
-1.9385832 -1.6375670 0.9631932
-1.9435181 -1.7869365 1.0486572
-1.9490733 -1.8168835 1.0714941
-1.9370323 -1.7173836 1.0031491
-1.9484097 -1.8111614 1.0657988
-1.9368863 -1.7061633 0.9962243
-1.9378042 -1.7277584 1.0089404
-1.9393651 -1.7506244 1.0231040
-1.9432600 -1.7822287 1.0443472
-1.9368825 -1.6972138 0.9912771
-1.9371452 -1.7022952 0.9936489
-1.9472217 -1.8038336 1.0597791
-1.9429034 -1.7765573 1.0396436
-1.9389959 -1.6481561 0.9661505
-1.9380801 -1.6652249 0.9741328
-1.9374385 -1.6888297 0.9859736
-1.9406632 -1.7578303 1.0264603
-1.9461558 -1.7968416 1.0539908
-1.9384010 -1.7239037 1.0051382
-1.9451501 -1.7896688 1.0480958
-1.9377576 -1.6840674 0.9829632
-1.9380817 -1.6751158 0.9782041
-1.9379795 -1.6799557 0.9806135
-1.9379453 -1.6867565 0.9840734
-1.9498223 -1.8138264 1.0656008
-1.9412764 -1.6280299 0.9563534
-1.9382515 -1.7139768 0.9986681
-1.9445925 -1.7849054 1.0441356
-1.9389416 -1.7209955 1.0021349
-1.9424721 -1.6210853 0.9523237
-1.9411812 -1.7541696 1.0221141
-1.9475750 -1.7994785 1.0538199
-1.9490386 -1.8070251 1.0593534
-1.9387273 -1.7105498 0.9957004
-1.9465228 -1.7928982 1.0486763
-1.9445458 -1.7794461 1.0389161
-1.9399539 -1.7325630 1.0081175
-1.9389759 -1.7021281 0.9903549
-1.9423120 -1.7608085 1.0256263
-1.9511931 -1.8164261 1.0654678
-1.9398912 -1.6643251 0.9710213
-1.9392399 -1.7063910 0.9922004
-1.9489538 -1.8027227 1.0543942
-1.9503832 -1.8096222 1.0592226
-1.9482435 -1.5847643 0.9365247
-1.9401488 -1.6705138 0.9728230
-1.9396466 -1.6935572 0.9847223
-1.9478102 -1.7956156 1.0487194
-1.9399782 -1.7178746 0.9981401
-1.9402585 -1.6802144 0.9770205
-1.9526047 -1.8196651 1.0660595
-1.9401761 -1.6851516 0.9794356
-1.9408628 -1.7244463 1.0008788
-1.9443772 -1.6201559 0.9492556
-1.9423529 -1.6412773 0.9581888
-1.9416052 -1.6538173 0.9641179
-1.9402376 -1.6892591 0.9813938
-1.9431327 -1.7584174 1.0217438
-1.9462819 -1.7828828 1.0383242
-1.9475512 -1.7913079 1.0443404
-1.9438356 -1.7638935 1.0250224
-1.9502487 -1.8054556 1.0544143
-1.9516952 -1.8128248 1.0598443
-1.9408108 -1.7141933 0.9942754
-1.9499610 -1.5821236 0.9338641
-1.9438603 -1.6336940 0.9542988
-1.9430108 -1.7528694 1.0169312
-1.9492307 -1.7983012 1.0485025
-1.9538196 -1.8220551 1.0663820
-1.9419262 -1.7366240 1.0066642
-1.9411960 -1.7061209 0.9885983
-1.9425778 -1.6596302 0.9647950
-1.9422064 -1.7318249 1.0032792
-1.9457959 -1.7726652 1.0291486
-1.9418822 -1.7214650 0.9971493
-1.9528861 -1.8154058 1.0600027
-1.9503584 -1.5854393 0.9337461
-1.9479103 -1.7863431 1.0383634
-1.9492082 -1.7941398 1.0436894
-1.9454021 -1.7669246 1.0245083
-1.9448816 -1.7617219 1.0209747
-1.9423136 -1.6701176 0.9690633
-1.9487616 -1.6006714 0.9391122
-1.9456640 -1.6271010 0.9495811
-1.9437761 -1.6481898 0.9585977
-1.9506689 -1.8016604 1.0489654
-1.9446074 -1.7560295 1.0162926
-1.9425765 -1.6853083 0.9755035
-1.9428314 -1.7186992 0.9936670
-1.9542500 -1.8178967 1.0599705
-1.9425688 -1.6893904 0.9774679
-1.9474465 -1.7757945 1.0285390
-1.9494018 -1.7892074 1.0379749
-1.9505918 -1.7969115 1.0433917
-1.9439794 -1.7403715 1.0051305
-1.9431531 -1.7144604 0.9902071
-1.9449695 -1.6469358 0.9561599
-1.9522514 -1.8046154 1.0487769
-1.9534940 -1.8118767 1.0543036
-1.9469890 -1.7706059 1.0246332
-1.9436697 -1.7257512 0.9967208
-1.9470682 -1.6258856 0.9471760
-1.9440428 -1.7363233 1.0026449
-1.9465078 -1.7648607 1.0203246
-1.9556295 -1.8211130 1.0608363
-1.9462338 -1.7598130 1.0163195
-1.9527565 -1.5887974 0.9309236
-1.9484045 -1.6245086 0.9449183
-1.9484248 -1.7736221 1.0244559
-1.9491772 -1.7795407 1.0286084
-1.9510239 -1.7924190 1.0375802
-1.9548589 -1.8145485 1.0541046
-1.9508381 -1.6037676 0.9365309
-1.9568735 -1.8234703 1.0609371
-1.9537186 -1.8073755 1.0484879
-1.9481021 -1.7684086 1.0202452
-1.9446778 -1.6945293 0.9763202
-1.9452042 -1.6749202 0.9665004
-1.9445757 -1.7076365 0.9831219
-1.9458951 -1.7448344 1.0045392
-1.9474855 -1.7625191 1.0160672
-1.9508873 -1.7876502 1.0333264
-1.9528977 -1.8012302 1.0429376
-1.9452310 -1.7189610 0.9896149
-1.9451640 -1.6895752 0.9730857
-1.9561984 -1.8170669 1.0540505
-1.9460754 -1.7400852 1.0010943
-1.9515571 -1.6073451 0.9361718
-1.9460775 -1.7347650 0.9977964
-1.9473210 -1.7569878 1.0112351
-1.9526843 -1.7960738 1.0377465
-1.9553453 -1.8109128 1.0487769
-1.9495183 -1.7714731 1.0200224
-1.9572491 -1.5732226 0.9229713
-1.9475127 -1.6526115 0.9540880
-1.9467614 -1.6644508 0.9595019
-1.9472592 -1.7521738 1.0070070
-1.9503117 -1.7774685 1.0241075
-1.9543007 -1.8038807 1.0427538
-1.9574494 -1.8201118 1.0548308
-1.9492576 -1.7665099 1.0159359
-1.9525154 -1.7906104 1.0325398
-1.9503756 -1.6317631 0.9446355
-1.9487873 -1.7605241 1.0114897
-1.9568690 -1.8137463 1.0484231
-1.9541724 -1.7989391 1.0373717
-1.9586696 -1.8225905 1.0550815
-1.9555691 -1.8064266 1.0426730
-1.9477737 -1.6709507 0.9607174
-1.9472828 -1.7227849 0.9880020
-1.9486798 -1.7552601 1.0067900
-1.9478122 -1.7383774 0.9967520
-1.9481263 -1.7447932 1.0002909
-1.9470868 -1.6989591 0.9741559
-1.9511642 -1.7745881 1.0193968
-1.9519652 -1.7805399 1.0235254
-1.9516043 -1.6303151 0.9424087
-1.9473719 -1.6949111 0.9717621
-1.9540935 -1.6060655 0.9319373
-1.9500663 -1.7635020 1.0113498
-1.9567418 -1.8094965 1.0434194
-1.9599855 -1.8250439 1.0550911
-1.9583695 -1.8164554 1.0481774
-1.9556216 -1.8017361 1.0370467
-1.9498783 -1.6526354 0.9502946
-1.9612074 -1.8275042 1.0553517
-1.9536434 -1.7843154 1.0235983
-1.9579802 -1.8121605 1.0435078
-1.9494724 -1.6700869 0.9575321
-1.9528667 -1.7784584 1.0193774
-1.9554991 -1.7972486 1.0325308
-1.9495479 -1.7427430 0.9962312
-1.9597419 -1.8197863 1.0489406
-1.9570684 -1.8051848 1.0377045
-1.9489512 -1.7124433 0.9779809
-1.9503273 -1.7488929 0.9988952
-1.9593102 -1.8147287 1.0434077
-1.9502599 -1.7389139 0.9920215
-1.9511821 -1.7558271 1.0020825
-1.9519182 -1.7621940 1.0061819
-1.9610550 -1.8222526 1.0489335
-1.9627648 -1.8308718 1.0558155
-1.9568514 -1.7999835 1.0322681
-1.9495786 -1.7043274 0.9724045
-1.9583606 -1.8078012 1.0375547
-1.9553522 -1.7875318 1.0229027
-1.9498858 -1.6995043 0.9694565
-1.9514803 -1.7465171 0.9950488
-1.9606817 -1.8173782 1.0434960
-1.9521321 -1.7531968 0.9984518
-1.9595825 -1.8102661 1.0375512
-1.9583237 -1.8035101 1.0325696
-1.9629159 -1.8265419 1.0498316
-1.9522867 -1.6756970 0.9556263
-1.9551859 -1.7776157 1.0134420
-1.9531935 -1.7601158 1.0016812
-1.9522236 -1.7433719 0.9914511
-1.9532901 -1.6577127 0.9464785
-1.9539922 -1.7657442 1.0048555
-1.9608106 -1.8134687 1.0381733
-1.9516060 -1.7180983 0.9759750
-1.9549718 -1.7720733 1.0086187
-1.9597078 -1.8064020 1.0324574
-1.9643318 -1.8297467 1.0504540
-1.9624585 -1.8208510 1.0435783
-1.9521445 -1.7098781 0.9704849
-1.9536340 -1.7510155 0.9940679
-1.9543209 -1.7568724 0.9970122
-1.9576890 -1.7882720 1.0180634
-1.9524699 -1.7052067 0.9673829
-1.9568176 -1.7808702 1.0127129
-1.9549232 -1.7633800 1.0009614
-1.9528687 -1.7303893 0.9804796
-1.9588856 -1.7947565 1.0220323
-1.9640318 -1.8237964 1.0433745
-1.9565156 -1.7758259 1.0087036
-1.9611981 -1.8091209 1.0319232
-1.9559619 -1.7697310 1.0043561
-1.9542519 -1.7470167 0.9900221
-1.9553036 -1.6580086 0.9431769
-1.9540511 -1.7411269 0.9859457
-1.9538899 -1.7272499 0.9769008
-1.9593370 -1.7915692 1.0176025
-1.9601502 -1.7974618 1.0217917
-1.9584622 -1.7840099 1.0120631
-1.9655065 -1.8263649 1.0430065
-1.9561681 -1.7610647 0.9966872
-1.9579833 -1.7787138 1.0082885
-1.9567006 -1.7671937 1.0006041
-1.9575192 -1.7729759 1.0039804
-1.9543447 -1.7229941 0.9734878
-1.9559778 -1.7549122 0.9924294
-1.9631270 -1.8132240 1.0319609
-1.9548433 -1.7348822 0.9794531
-1.9562081 -1.7514713 0.9894560
-1.9548867 -1.7147768 0.9680034
-1.9560430 -1.7453497 0.9852226
-1.9601467 -1.7878328 1.0120868
-1.9569865 -1.6666207 0.9432359
-1.9554926 -1.7020890 0.9604302
-1.9553966 -1.7112340 0.9651511
-1.9571561 -1.7583914 0.9926764
-1.9614036 -1.7957620 1.0172816
-1.9660371 -1.8229981 1.0374223
-1.9595627 -1.7818160 1.0076721
-1.9584358 -1.7704660 0.9998751
-1.9590523 -1.7760130 1.0034229
-1.9578654 -1.7641052 0.9957762
-1.9576685 -1.6646215 0.9414304
-1.9560415 -1.6978096 0.9570775
-1.9650932 -1.8164455 1.0309543
-1.9561474 -1.7273899 0.9729448
-1.9569044 -1.7385717 0.9783862
-1.9573637 -1.7446912 0.9822624
-1.9634965 -1.8043540 1.0212363
-1.9581737 -1.7551389 0.9883802
-1.9617663 -1.7909112 1.0114948
-1.9611523 -1.7850539 1.0072906
-1.9569217 -1.7193091 0.9669243
-1.9594341 -1.7674415 0.9953322
-1.9606614 -1.7797319 1.0035079
-1.9631375 -1.7987830 1.0164340
-1.9589823 -1.7618207 0.9918163
-1.9651776 -1.8116976 1.0253749
-1.9602017 -1.7736962 0.9991476
-1.9575504 -1.7351770 0.9750083
-1.9667329 -1.8193693 1.0305038
-1.9685840 -1.8279551 1.0373960
-1.9578528 -1.6929868 0.9518504
-1.9576820 -1.7073388 0.9591887
-1.9576452 -1.7112843 0.9612870
-1.9576316 -1.7152242 0.9633995
-1.9648921 -1.8070548 1.0210031
-1.9662716 -1.8148909 1.0262806
-1.9580442 -1.7312289 0.9717101
-1.9634320 -1.7946172 1.0116317
-1.9580197 -1.7022597 0.9560423
-1.9582439 -1.6976951 0.9533737
-1.9587507 -1.7428088 0.9780157
-1.9681103 -1.8225694 1.0313893
-1.9595016 -1.6715995 0.9406363
-1.9585861 -1.6886619 0.9486154
-1.9583092 -1.7273764 0.9691251
-1.9645309 -1.8015850 1.0161028
-1.9628913 -1.7887508 1.0070769
-1.9596321 -1.7529635 0.9839840
-1.9622221 -1.7828277 1.0029307
-1.9611050 -1.7713549 0.9952230
-1.9601459 -1.7593057 0.9877190
-1.9617844 -1.7774746 0.9992085
-1.9606325 -1.7651215 0.9910571
-1.9594905 -1.7484385 0.9807442
-1.9597758 -1.6772305 0.9424097
-1.9674622 -1.8173448 1.0262868
-1.9663037 -1.8098038 1.0207253
-1.9593158 -1.7388862 0.9742860
-1.9589642 -1.7233516 0.9655222
-1.9590135 -1.7194603 0.9633673
-1.9648739 -1.7974467 1.0112734
-1.9600145 -1.6828726 0.9441611
-1.9661139 -1.8053107 1.0165308
-1.9594819 -1.7158541 0.9605680
-1.9644725 -1.7917738 1.0065683
-1.9599417 -1.7356755 0.9711341
-1.9638948 -1.7866263 1.0029784
-1.9677026 -1.8133511 1.0213124
-1.9633362 -1.7804668 0.9986970
-1.9613067 -1.7563055 0.9831923
-1.9598814 -1.7061432 0.9547721
-1.9613020 -1.6707017 0.9375075
-1.9603633 -1.6877781 0.9454796
-1.9599135 -1.7113290 0.9574339
-1.9688799 -1.8199823 1.0261152
-1.9628106 -1.7745461 0.9945668
-1.9606654 -1.7461521 0.9768067
-1.9618729 -1.7629496 0.9870068
-1.9622694 -1.7690206 0.9909565
-1.9601759 -1.6971696 0.9499214
-1.9601316 -1.7023819 0.9525409
-1.9603905 -1.7311379 0.9675769
-1.9661340 -1.8001072 1.0110733
-1.9614975 -1.7528639 0.9802125
-1.9624529 -1.6598271 0.9313236
-1.9607141 -1.6933945 0.9473063
-1.9676577 -1.8081952 1.0161211
-1.9618264 -1.6767663 0.9390284
-1.9607575 -1.7230886 0.9623202
-1.9611969 -1.7429274 0.9736484
-1.9702729 -1.8225317 1.0260275
-1.9660616 -1.7947388 1.0060844
-1.9619504 -1.6817851 0.9406690
-1.9692230 -1.8161390 1.0209953
-1.9611884 -1.7279957 0.9643768
-1.9649180 -1.7835085 0.9981393
-1.9638544 -1.7722996 0.9905662
-1.9629100 -1.7602778 0.9830545
-1.9656851 -1.7896852 1.0020807
-1.9644978 -1.7777235 0.9938842
-1.9621725 -1.6873300 0.9425115
-1.9676521 -1.8036794 1.0113139
-1.9634913 -1.6650677 0.9320134
-1.9618236 -1.6966430 0.9469717
-1.9619460 -1.7392270 0.9697854
-1.9616694 -1.7197177 0.9589367
-1.9625348 -1.7496944 0.9758492
-1.9715669 -1.8255909 1.0267849
-1.9690885 -1.8109944 1.0157929
-1.9618375 -1.7109118 0.9538780
-1.9619919 -1.7151317 0.9558350
-1.9622402 -1.7021806 0.9489003
-1.9621349 -1.7061472 0.9509568
-1.9624982 -1.6929964 0.9442673
-1.9633455 -1.7564665 0.9791869
-1.9623337 -1.7356637 0.9669355
-1.9644933 -1.6581619 0.9278546
-1.9637708 -1.6706994 0.9337857
-1.9634820 -1.6759650 0.9362727
-1.9706346 -1.8188425 1.0207603
-1.9628884 -1.7463247 0.9728129
-1.9676313 -1.7984287 1.0062066
-1.9672035 -1.7928341 1.0017810
-1.9665757 -1.7873179 0.9981767
-1.9647480 -1.6638013 0.9296076
-1.9692098 -1.8067068 1.0111033
-1.9660973 -1.7814830 0.9939625
-1.9628320 -1.7275744 0.9612997
-1.9643955 -1.7634673 0.9823365
-1.9655966 -1.7753891 0.9896200
-1.9639783 -1.6816721 0.9375185
-1.9706039 -1.8144860 1.0161160
-1.9632696 -1.7328253 0.9635328
-1.9652982 -1.7700870 0.9858504
-1.9640212 -1.6865245 0.9393101
-1.9637200 -1.7435259 0.9693399
-1.9720644 -1.8215035 1.0205654
-1.9644450 -1.7540325 0.9753890
-1.9690092 -1.8014236 1.0060337
-1.9651227 -1.7606612 0.9788521
-1.9656262 -1.6703415 0.9307512
-1.9638316 -1.7243712 0.9577620
-1.9638680 -1.7105872 0.9503434
-1.9638723 -1.7197127 0.9551167
-1.9688084 -1.7965215 1.0019008
-1.9705950 -1.8094370 1.0108397
-1.9643670 -1.6922896 0.9409747
-1.9641239 -1.7015200 0.9455753
-1.9642550 -1.7394488 0.9657577
-1.9682917 -1.7905046 0.9975217
-1.9648376 -1.7499747 0.9717633
-1.9676637 -1.7844740 0.9934519
-1.9720821 -1.8172874 1.0158055
-1.9673065 -1.7792296 0.9896288
-1.9661451 -1.7668610 0.9814967
-1.9659877 -1.6752447 0.9320800
-1.9644278 -1.7153605 0.9518351
-1.9667889 -1.7733361 0.9854790
-1.9645275 -1.7062794 0.9470486
-1.9667259 -1.6631461 0.9264029
-1.9649353 -1.6973445 0.9421972
-1.9658464 -1.6803082 0.9341833
-1.9707064 -1.8049551 1.0059991
-1.9668229 -1.6685394 0.9282412
-1.9655759 -1.7471211 0.9683319
-1.9651448 -1.7315871 0.9595454
-1.9720573 -1.8129206 1.0111683
-1.9703021 -1.7994676 1.0014314
-1.9654168 -1.7366257 0.9619582
-1.9663098 -1.6862560 0.9358057
-1.9664935 -1.7576618 0.9739750
-1.9692220 -1.7881806 0.9935456
-1.9660914 -1.6917285 0.9380937
-1.9735882 -1.8200907 1.0154746
-1.9704676 -1.6331966 0.9118180
-1.9669257 -1.7639795 0.9776668
-1.9700212 -1.7944259 0.9974198
-1.9659440 -1.7285167 0.9563565
-1.9679013 -1.7709404 0.9812729
-1.9721444 -1.8078960 1.0058716
-1.9662541 -1.7437760 0.9649099
-1.9683922 -1.7770323 0.9852274
-1.9668322 -1.7542099 0.9710199
-1.9659159 -1.7242639 0.9540166
-1.9690401 -1.7823212 0.9886875
-1.9703768 -1.6414412 0.9144721
-1.9684864 -1.6619786 0.9234240
-1.9678219 -1.6743405 0.9289687
-1.9663701 -1.7060065 0.9438853
-1.9666238 -1.6968449 0.9392351
-1.9662453 -1.7198614 0.9511825
-1.9735238 -1.8157373 1.0108257
-1.9665752 -1.7111465 0.9461685
-1.9718152 -1.8024209 1.0009562
-1.9673796 -1.7513374 0.9679775
-1.9707660 -1.7912282 0.9930149
-1.9671200 -1.7024897 0.9410699
-1.9671252 -1.7409551 0.9614671
-1.9716535 -1.7974908 0.9968758
-1.9680533 -1.6853006 0.9327200
-1.9690889 -1.6682568 0.9247458
-1.9672499 -1.7364775 0.9586413
-1.9686142 -1.7680495 0.9774512
-1.9684032 -1.7620462 0.9734682
-1.9736299 -1.8107693 1.0054724
-1.9752210 -1.6123630 0.9013603
-1.9705842 -1.7855023 0.9883723
-1.9700734 -1.7802112 0.9845463
-1.9750654 -1.8185443 1.0104926
-1.9733487 -1.8061497 1.0013852
-1.9697686 -1.7741873 0.9801816
-1.9695191 -1.6741797 0.9262642
-1.9682259 -1.7475402 0.9637573
-1.9687609 -1.7579385 0.9698863
-1.9679585 -1.7332595 0.9555035
-1.9684619 -1.6961464 0.9359286
-1.9680419 -1.7283850 0.9525585
-1.9724540 -1.7944210 0.9923522
-1.9682689 -1.7235514 0.9496883
-1.9690205 -1.7544096 0.9669919
-1.9731475 -1.8005419 0.9963049
-1.9760343 -1.6196267 0.9029597
-1.9698860 -1.6790808 0.9275997
-1.9750404 -1.8135916 1.0051228
-1.9708915 -1.6668033 0.9214948
-1.9703439 -1.7716208 0.9768082
-1.9688623 -1.7443889 0.9605407
-1.9722344 -1.7891553 0.9881818
-1.9689085 -1.7108748 0.9420961
-1.9691337 -1.7017234 0.9374042
-1.9717370 -1.7833526 0.9839348
-1.9690230 -1.7154058 0.9441918
-1.9738247 -1.6391760 0.9091837
-1.9702280 -1.7656954 0.9723885
-1.9714541 -1.7781859 0.9800356
-1.9732656 -1.6475107 0.9121071
-1.9750285 -1.8091010 1.0006016
-1.9694749 -1.7404411 0.9569129
-1.9706752 -1.7623442 0.9693586
-1.9702091 -1.7520520 0.9631360
-1.9765768 -1.8170768 1.0054509
-1.9743055 -1.7983075 0.9919533
-1.9779003 -1.6178882 0.8994976
-1.9721890 -1.6734177 0.9221842
-1.9700671 -1.7371335 0.9538434
-1.9709282 -1.7589055 0.9663735
-1.9701398 -1.7282086 0.9488896
-1.9706041 -1.7479061 0.9595960
-1.9702507 -1.7331473 0.9513696
-1.9722823 -1.7752202 0.9757788
-1.9707438 -1.7012590 0.9343759
-1.9765525 -1.8120557 1.0001484
-1.9731701 -1.7816258 0.9794886
-1.9750342 -1.6461356 0.9094528
-1.9742985 -1.7928716 0.9870362
-1.9779905 -1.8198766 1.0051429
-1.9762387 -1.8071293 0.9960355
-1.9710515 -1.7159642 0.9410127
-1.9792496 -1.6167176 0.8970264
-1.9734230 -1.6721561 0.9197615
-1.9713509 -1.7070672 0.9360836
-1.9712067 -1.7253451 0.9455588
-1.9758168 -1.8015660 0.9915479
-1.9712558 -1.7202860 0.9427876
-1.9714651 -1.7450779 0.9561637
-1.9725391 -1.7660474 0.9682345
-1.9723421 -1.7557971 0.9616181
-1.9732650 -1.7727036 0.9716757
-1.9758024 -1.7966753 0.9874095
-1.9780916 -1.8156317 1.0003887
-1.9776897 -1.8102126 0.9957721
-1.9741803 -1.7792650 0.9752423
-1.9725566 -1.7521189 0.9588600
-1.9730372 -1.7625549 0.9649521
-1.9750771 -1.7857155 0.9792665
-1.9760748 -1.6537207 0.9097008
-1.9723460 -1.7373325 0.9498322
-1.9775059 -1.8045615 0.9907106
-1.9805991 -1.6236186 0.8974233
-1.9778957 -1.6435172 0.9048762
-1.9748785 -1.6790595 0.9201989
-1.9728797 -1.7289617 0.9445092
-1.9728347 -1.7329109 0.9466029
-1.9795627 -1.8184328 1.0000612
-1.9743752 -1.7704132 0.9677314
-1.9733084 -1.7252149 0.9418429
-1.9735511 -1.7487687 0.9546882
-1.9733131 -1.7200470 0.9391712
-1.9737999 -1.6972214 0.9270408
-1.9751695 -1.7769702 0.9712827
-1.9757184 -1.7823590 0.9746309
-1.9776597 -1.6519625 0.9072265
-1.9794477 -1.8138679 0.9956270
-1.9790125 -1.8083254 0.9911097
-1.9743930 -1.7558549 0.9577098
-1.9748735 -1.7662810 0.9638062
-1.9771142 -1.6607093 0.9098466
-1.9769409 -1.7889938 0.9781534
-1.9766587 -1.6781683 0.9170494
-1.9782430 -1.7972772 0.9826778
-1.9745494 -1.7420215 0.9486418
-1.9810637 -1.8168846 0.9950960
-1.9767900 -1.7799844 0.9703955
-1.9775089 -1.7864070 0.9744437
-1.9803053 -1.6435388 0.9011260
-1.9777588 -1.6673121 0.9108365
-1.9751099 -1.7381340 0.9454062
-1.9805541 -1.8113155 0.9906001
-1.9753422 -1.7249124 0.9381956
-1.9757102 -1.7536782 0.9536967
-1.9754302 -1.7291783 0.9400887
-1.9762513 -1.7602653 0.9571709
-1.9767849 -1.7706663 0.9633018
-1.9799918 -1.6580884 0.9052791
-1.9765557 -1.7028467 0.9251013
-1.9776754 -1.7775322 0.9665755
-1.9801097 -1.8007961 0.9817107
-1.9765394 -1.7461277 0.9472328
-1.9770477 -1.7585353 0.9543562
-1.9796437 -1.6663812 0.9077547
-1.9766951 -1.7373214 0.9421802
-1.9787737 -1.7836189 0.9693358
-1.9822249 -1.8142537 0.9898301
-1.9794161 -1.7897391 0.9732791
-1.9794258 -1.6837916 0.9151178
-1.9774319 -1.7292166 0.9366362
-1.9786915 -1.7743479 0.9622025
-1.9781587 -1.7640981 0.9559312
-1.9774329 -1.7337354 0.9389622
-1.9782932 -1.7614163 0.9539807
-1.9803705 -1.6729688 0.9087997
-1.9783026 -1.7019725 0.9219471
-1.9796050 -1.7810342 0.9656441
-1.9820260 -1.8050575 0.9813241
-1.9833560 -1.8124129 0.9854525
-1.9836211 -1.6495260 0.8984662
-1.9816944 -1.6647294 0.9042910
-1.9784939 -1.7507389 0.9465031
-1.9807396 -1.7878606 0.9689744
-1.9812413 -1.7938800 0.9730041
-1.9819433 -1.7994893 0.9765360
-1.9789072 -1.7461607 0.9428887
-1.9837257 -1.8082190 0.9806858
-1.9807630 -1.7786652 0.9614072
-1.9847787 -1.6475794 0.8954971
-1.9823148 -1.6713379 0.9052643
-1.9803623 -1.6963658 0.9163581
-1.9794966 -1.7382692 0.9376136
-1.9794453 -1.7429453 0.9402322
-1.9815100 -1.7845404 0.9647030
-1.9802878 -1.7686304 0.9549150
-1.9849985 -1.8160730 0.9856085
-1.9834680 -1.8025562 0.9759493
-1.9797224 -1.7338501 0.9350389
-1.9805179 -1.7632297 0.9507741
-1.9829003 -1.7915149 0.9675526
-1.9809809 -1.7076167 0.9199568
-1.9854287 -1.8113224 0.9800726
-1.9833023 -1.7886481 0.9644547
-1.9850935 -1.8062765 0.9760687
-1.9826590 -1.7822775 0.9603672
-1.9810778 -1.7503806 0.9414143
-1.9841657 -1.6704116 0.9021598
-1.9819251 -1.7664360 0.9501517
-1.9823881 -1.7725452 0.9536757
-1.9871517 -1.6476071 0.8917111
-1.9850599 -1.8008737 0.9711244
-1.9848278 -1.7956790 0.9672634
-1.9872019 -1.8149386 0.9799463
-1.9830477 -1.7020095 0.9143736
-1.9872481 -1.6532629 0.8933722
-1.9846787 -1.6770385 0.9030619
-1.9822837 -1.7387013 0.9330325
-1.9821982 -1.7433898 0.9356308
-1.9822619 -1.7478187 0.9377937
-1.9866240 -1.8090071 0.9754736
-1.9844758 -1.7863510 0.9601562
-1.9850605 -1.7917652 0.9634824
-1.9863273 -1.8041515 0.9716143
-1.9832093 -1.7660107 0.9474202
-1.9836198 -1.7703166 0.9496375
-1.9843747 -1.7769731 0.9531336
-1.9838773 -1.7080133 0.9154334
-1.9836976 -1.7125408 0.9174832
-1.9833338 -1.7552280 0.9400694
-1.9880316 -1.8119228 0.9753927
-1.9852340 -1.7828561 0.9556456
-1.9877712 -1.8069640 0.9712711
-1.9848103 -1.7011266 0.9112252
-1.9866889 -1.7955421 0.9635459
-1.9841287 -1.7433706 0.9322126
-1.9861997 -1.7893898 0.9592540
-1.9872782 -1.6770290 0.8994331
-1.9845114 -1.7478686 0.9339303
-1.9845355 -1.7525340 0.9365843
-1.9895614 -1.8154539 0.9756627
-1.9854447 -1.7698053 0.9458711
-1.9900632 -1.6542622 0.8888469
-1.9857245 -1.7076556 0.9123821
-1.9892367 -1.8097822 0.9709561
-1.9863401 -1.7804304 0.9518293
-1.9874943 -1.7923211 0.9591775
-1.9861871 -1.7743930 0.9478543
-1.9859031 -1.7122502 0.9139709
-1.9883724 -1.7986465 0.9629361
-1.9872555 -1.7870991 0.9552938
-1.9891559 -1.8048615 0.9668362
-1.9858011 -1.7174306 0.9159792
-1.9916416 -1.6523350 0.8866025
-1.9907555 -1.8132642 0.9712711
-1.9864299 -1.7572543 0.9358081
-1.9889403 -1.7958376 0.9594390
-1.9863180 -1.7481699 0.9308936
-1.9872635 -1.7065529 0.9093883
-1.9898497 -1.8017140 0.9627349
-1.9866852 -1.7524764 0.9328067
-1.9881201 -1.7837912 0.9510288
-1.9905077 -1.8075565 0.9665996
-1.9865619 -1.7435334 0.9278210
-1.9889343 -1.7902196 0.9547111
-1.9884047 -1.7787736 0.9470027
-1.9878851 -1.7116637 0.9105806
-1.9877973 -1.7171922 0.9128588
-1.9903508 -1.7986068 0.9591330
-1.9917954 -1.8103442 0.9666468
-1.9902448 -1.6836742 0.8966106
-1.9874907 -1.7318054 0.9193870
-1.9876176 -1.7362178 0.9216344
-1.9914040 -1.8052650 0.9629735
-1.9879498 -1.7218453 0.9143742
-1.9898344 -1.7876682 0.9509980
-1.9884786 -1.7607926 0.9344009
-1.9905612 -1.7932996 0.9541207
-1.9887319 -1.7666710 0.9376628
-1.9889709 -1.7712685 0.9404491
-1.9893954 -1.7777650 0.9443997
-1.9885206 -1.7473733 0.9266130
-1.9886785 -1.7564376 0.9314724
-1.9918467 -1.8014415 0.9587711
-1.9933299 -1.8138363 0.9669150
-1.9888895 -1.7525891 0.9288658
-1.9897248 -1.7112938 0.9075413
-1.9916031 -1.6817752 0.8941982
-1.9928489 -1.8080622 0.9626420
-1.9918416 -1.7967982 0.9547418
-1.9899147 -1.7167854 0.9094395
-1.9913765 -1.7906973 0.9504463
-1.9893714 -1.7306973 0.9158642
-1.9894324 -1.7444528 0.9233001
-1.9906532 -1.7803009 0.9439080
-1.9900345 -1.7212701 0.9110091
-1.9896522 -1.7358302 0.9180702
-1.9947558 -1.6595210 0.8832341
-1.9899631 -1.7268559 0.9133433
-1.9901518 -1.7642563 0.9335008
-1.9908163 -1.7754044 0.9401818
-1.9913017 -1.7008316 0.9005454
-1.9934056 -1.8050211 0.9589852
-1.9906662 -1.7710642 0.9371499
-1.9942942 -1.8108169 0.9623526
-1.9924448 -1.7931248 0.9504371
-1.9927573 -1.7955962 0.9520107
-1.9907284 -1.7608484 0.9305300
-1.9917131 -1.7064297 0.9024044
-1.9937832 -1.8014560 0.9552663
-1.9908982 -1.7570196 0.9278928
-1.9923792 -1.7845317 0.9439211
-1.9915214 -1.7683285 0.9336207
-1.9940445 -1.6817970 0.8904656
-1.9931267 -1.6897394 0.8936568
-1.9928506 -1.6943044 0.8956567
-1.9949183 -1.8080536 0.9588194
-1.9919796 -1.7162949 0.9060904
-1.9923858 -1.7785059 0.9396153
-1.9956271 -1.8143032 0.9626474
-1.9934322 -1.7893005 0.9457347
-1.9920476 -1.7215521 0.9080793
-1.9916079 -1.7444295 0.9194958
-1.9919572 -1.7261300 0.9101105
-1.9916800 -1.7491170 0.9221318
-1.9916440 -1.7353646 0.9146716
-1.9917492 -1.7403676 0.9170729
-1.9967115 -1.6629582 0.8811337
-1.9921057 -1.7306603 0.9117531
-1.9928493 -1.7746504 0.9357970
-1.9948053 -1.7990520 0.9510949
-1.9925018 -1.7644212 0.9295396
-1.9997306 -1.6408567 0.8719898
-1.9945303 -1.6884340 0.8913485
-1.9937050 -1.7002988 0.8967214
-1.9934940 -1.7055459 0.8992607
-1.9935733 -1.7811830 0.9393622
-1.9943893 -1.7916841 0.9457020
-1.9942496 -1.7878398 0.9431378
-1.9965841 -1.8108394 0.9581688
-1.9929161 -1.7608938 0.9266554
-1.9991798 -1.6497880 0.8744121
-1.9939136 -1.7104284 0.9006276
-1.9933033 -1.7714758 0.9325837
-1.9939488 -1.7156133 0.9027970
-1.9952577 -1.7961981 0.9475844
-1.9976206 -1.6661282 0.8804027
-1.9932319 -1.7571600 0.9239536
-1.9960084 -1.6856724 0.8884390
-1.9953453 -1.6943020 0.8919584
-1.9940760 -1.7210306 0.9047499
-1.9936358 -1.7491532 0.9186664
-1.9941372 -1.7257502 0.9066858
-1.9953082 -1.6995339 0.8940250
-1.9946492 -1.7786641 0.9355912
-1.9938281 -1.7350468 0.9111781
-1.9940580 -1.7684851 0.9292872
-1.9951283 -1.7849219 0.9393984
-1.9938208 -1.7399308 0.9135666
-1.9938853 -1.7444229 0.9157019
-1.9939114 -1.7530665 0.9204235
-1.9942911 -1.7301596 0.9083468
-1.9958343 -1.7910344 0.9424776
-1.9969472 -1.8033359 0.9503533
-1.9957457 -1.7052655 0.8957533
-1.9950976 -1.7758156 0.9325005
-1.9970115 -1.6884400 0.8876422
-1.9948538 -1.7653919 0.9260413
-1.9960629 -1.7815746 0.9351402
-1.9951631 -1.7609323 0.9228015
-1.9999524 -1.6643041 0.8766776
-2.0032818 -1.6385707 0.8667747
-1.9971826 -1.6933902 0.8888458
-1.9963648 -1.7104247 0.8968969
-1.9958018 -1.7719593 0.9283245
-1.9970331 -1.7884552 0.9384477
-1.9972992 -1.7946849 0.9422684
-1.9963681 -1.7198111 0.9008853
-1.9960476 -1.7304452 0.9058439
-1.9963084 -1.7252400 0.9032819
-2.0026229 -1.6475185 0.8691201
-1.9985008 -1.6858432 0.8848261
-1.9974506 -1.6990210 0.8906107
-1.9958149 -1.7579384 0.9199411
-1.9958607 -1.7530654 0.9169915
-1.9960246 -1.7387605 0.9096010
-1.9961828 -1.7348026 0.9075564
-1.9960020 -1.7440409 0.9121592
-1.9959821 -1.7489881 0.9145856
-1.9985515 -1.8010540 0.9451383
-1.9973944 -1.7843034 0.9349087
-2.0021513 -1.6557108 0.8716207
-1.9970178 -1.7790374 0.9314232
-1.9976795 -1.7046171 0.8924073
-2.0036802 -1.6445415 0.8671172
-2.0008944 -1.6674727 0.8759109
-2.0031833 -1.6534600 0.8695843
-1.9998320 -1.6851396 0.8825440
-1.9981852 -1.7095639 0.8937421
-1.9971496 -1.7647619 0.9215978
-1.9997949 -1.8084339 0.9475867
-1.9976538 -1.7755637 0.9273004
-1.9996581 -1.6933931 0.8851353
-1.9992742 -1.6981140 0.8874890
-1.9985213 -1.7151507 0.8955888
-1.9974679 -1.7610558 0.9188733
-1.9984057 -1.7245928 0.8999981
-1.9986280 -1.7819396 0.9306706
-1.9980763 -1.7385718 0.9064275
-2.0000908 -1.8046623 0.9440343
-1.9979667 -1.7434782 0.9088549
-1.9983693 -1.7344012 0.9041565
-1.9985624 -1.7299557 0.9020217
-1.9980788 -1.7489978 0.9111935
-1.9997316 -1.7031804 0.8886896
-1.9980224 -1.7577078 0.9158294
-1.9980471 -1.7530586 0.9131706
-2.0000438 -1.7091565 0.8907537
-2.0061828 -1.6452320 0.8639137
-2.0028318 -1.6710296 0.8737235
-2.0009963 -1.6921056 0.8827836
-1.9995769 -1.7797777 0.9266200
-2.0057014 -1.6541493 0.8663936
-2.0047027 -1.6620978 0.8695168
-1.9992933 -1.7692920 0.9205604
-1.9992150 -1.7654266 0.9183473
-2.0073829 -1.6423445 0.8618954
-2.0015514 -1.6985389 0.8839053
-2.0067282 -1.6511665 0.8643829
-2.0003592 -1.7389136 0.9030289
-2.0061136 -1.6592173 0.8669550
-2.0018463 -1.7082634 0.8876259
-2.0088031 -1.6409279 0.8597259
-2.0029574 -1.6911629 0.8797538
-2.0001799 -1.7620202 0.9142506
-2.0003868 -1.7528437 0.9091418
-2.0028461 -1.8101899 0.9421950
-2.0047007 -1.6763582 0.8722813
-2.0036739 -1.6889473 0.8780059
-2.0029927 -1.6968429 0.8813596
-2.0025300 -1.8048547 0.9384225
-2.0088372 -1.6502014 0.8614409
-2.0027863 -1.7142551 0.8887334
-2.0023474 -1.7953979 0.9314593
-2.0026525 -1.7992226 0.9337301
-2.0038695 -1.7033921 0.8825072
-2.0102665 -1.6487302 0.8593396
-2.0026142 -1.7824288 0.9216255
-2.0043330 -1.8084111 0.9374218
-2.0088065 -1.6651432 0.8646426
-2.0040563 -1.7989914 0.9304164
-2.0099915 -1.6573456 0.8614570
-2.0114671 -1.6463152 0.8573478
-2.0045394 -1.8034474 0.9330064
-2.0055944 -1.7019278 0.8792385
-2.0123858 -1.6436152 0.8556137
-2.0074556 -1.6819860 0.8703422
-2.0112204 -1.6551384 0.8594235
-2.0069552 -1.6955206 0.8753968
-2.0124967 -1.6528785 0.8573888
-2.0109036 -1.6647841 0.8618279
-2.0088260 -1.6806898 0.8680119
-2.0048641 -1.7864179 0.9198848
-2.0057136 -1.8021324 0.9293969
-2.0062746 -1.8070742 0.9322987
-2.0124080 -1.6628512 0.8594674
-2.0065447 -1.7995498 0.9257032
-2.0143818 -1.6524484 0.8549311
-2.0075420 -1.8064027 0.9289957
-2.0084197 -1.7074160 0.8769307
-2.0056057 -1.7691828 0.9066427
-2.0151041 -1.6494445 0.8534292
-2.0138528 -1.6614230 0.8573257
-2.0061742 -1.7557779 0.8985196
-2.0150221 -1.6585264 0.8552982
-2.0068510 -1.7482459 0.8936406
-2.0088526 -1.8042700 0.9245405
-2.0147784 -1.6691553 0.8573665
-2.0086581 -1.7901233 0.9148971
-2.0084673 -1.7609910 0.8973395
-2.0091238 -1.7522252 0.8919104
-2.0092841 -1.7718597 0.9026069
-2.0104328 -1.8017134 0.9196618
-2.0109279 -1.7518667 0.8888226
-2.0109293 -1.7604632 0.8935826
-2.0125491 -1.8061729 0.9187317
-2.0119663 -1.7775042 0.9006203
-2.0128879 -1.8030451 0.9154746
-2.0146498 -1.8066612 0.9147947
-2.0135564 -1.7444733 0.8799032
-2.0134103 -1.7570434 0.8866901
-2.0135392 -1.7661294 0.8915528
-2.0151537 -1.7277403 0.8712868
-2.0146205 -1.7831590 0.8986177
-2.0153119 -1.7986580 0.9074704
-2.0159472 -1.7909898 0.9010396
-2.0169369 -1.8016493 0.9065786
-2.0162972 -1.7867692 0.8975681
-2.0173275 -1.8071062 0.9098352
-2.0163785 -1.7498202 0.8777755
-2.0174971 -1.7311295 0.8684755
-2.0186752 -1.7116942 0.8586322
-2.0165641 -1.7589591 0.8813352
-2.0182029 -1.7343563 0.8685017
-2.0179506 -1.8006565 0.9039068
-2.0183598 -1.8049175 0.9062105
-2.0179153 -1.7947450 0.8998894
-2.0202926 -1.7090724 0.8558926
-2.0181090 -1.7903286 0.8965917
-2.0190383 -1.7396450 0.8690582
-2.0188044 -1.7448941 0.8715810
-2.0186783 -1.7488657 0.8736208
-2.0184727 -1.7868445 0.8936624
-2.0183339 -1.7626471 0.8802545
-2.0186594 -1.7543264 0.8760935
-2.0202820 -1.7281914 0.8628882
-2.0190435 -1.7589441 0.8776203
-2.0198734 -1.8042553 0.9028990
-2.0199405 -1.7990509 0.8990751
-2.0213471 -1.7173392 0.8566347
-2.0205848 -1.7331130 0.8641724
-2.0195064 -1.7841941 0.8900873
-2.0197830 -1.7941978 0.8960873
-2.0200027 -1.7670959 0.8795954
-2.0206514 -1.7533271 0.8725500
-2.0206287 -1.7905826 0.8921533
-2.0228382 -1.7151045 0.8541932
-2.0257078 -1.6869758 0.8422186
-2.0211893 -1.7449075 0.8678020
-2.0207196 -1.7588159 0.8749176
-2.0204403 -1.7764120 0.8838111
-2.0204689 -1.7810724 0.8864696
-2.0206752 -1.7633686 0.8769774
-2.0212065 -1.7490515 0.8697050
-2.0218750 -1.8027411 0.8979813
-2.0216196 -1.7977706 0.8951005
-2.0224353 -1.7328236 0.8610562
-2.0224678 -1.7381384 0.8630792
-2.0217584 -1.7880499 0.8884764
-2.0244873 -1.7133908 0.8516798
-2.0220026 -1.7707445 0.8781280
-2.0224942 -1.7571699 0.8713247
-2.0225816 -1.7950792 0.8915439
-2.0222770 -1.7846366 0.8855019
-2.0228068 -1.7480092 0.8666824
-2.0226005 -1.7672580 0.8757282
-2.0232842 -1.7441345 0.8641497
-2.0234133 -1.8020427 0.8946904
-2.0244548 -1.7278764 0.8560235
-2.0241744 -1.7318753 0.8579604
-2.0233402 -1.7541039 0.8686672
-2.0230933 -1.7629172 0.8730922
-2.0291486 -1.6847082 0.8369296
-2.0245028 -1.7380770 0.8597827
-2.0256983 -1.7205033 0.8517808
-2.0237810 -1.7923797 0.8876216
-2.0284000 -1.6932045 0.8397254
-2.0239686 -1.7889139 0.8850583
-2.0241986 -1.7615508 0.8707537
-2.0239794 -1.7751962 0.8775710
-2.0247714 -1.7437200 0.8615391
-2.0245250 -1.7988028 0.8904277
-2.0245206 -1.7716119 0.8747580
-2.0245925 -1.7807324 0.8795548
-2.0245680 -1.7846759 0.8816586
-2.0272711 -1.7190333 0.8497474
-2.0252796 -1.8056890 0.8936326
-2.0251854 -1.7533799 0.8653895
-2.0249620 -1.7676975 0.8722577
-2.0256458 -1.7486898 0.8624475
-2.0254074 -1.7959672 0.8870036
-2.0300992 -1.6917050 0.8370180
-2.0267864 -1.7322011 0.8539400
-2.0258571 -1.7926003 0.8839757
-2.0268983 -1.7429107 0.8579286
-2.0265418 -1.8031742 0.8895388
-2.0277964 -1.7306310 0.8517667
-2.0261962 -1.7838637 0.8784528
-2.0263801 -1.7892048 0.8809829
-2.0266824 -1.7753040 0.8732984
-2.0270650 -1.7990738 0.8859761
-2.0320688 -1.6913619 0.8340769
-2.0310863 -1.6993074 0.8372199
-2.0275294 -1.7480475 0.8590955
-2.0271085 -1.7664088 0.8684073
-2.0270276 -1.7717186 0.8709160
-2.0338329 -1.6804830 0.8287327
-2.0330390 -1.6883977 0.8320092
-2.0286513 -1.7414784 0.8546166
-2.0277452 -1.7960219 0.8826695
-2.0290281 -1.7376569 0.8525188
-2.0325602 -1.6970457 0.8346282
-2.0281984 -1.7928596 0.8799181
-2.0288878 -1.8034414 0.8854723
-2.0302420 -1.7306360 0.8480307
-2.0293890 -1.7477115 0.8560210
-2.0286663 -1.7801333 0.8723536
-2.0292087 -1.7575671 0.8607359
-2.0290715 -1.7754663 0.8693578
-2.0297469 -1.7532943 0.8578789
-2.0305905 -1.7363870 0.8497029
-2.0293102 -1.7714155 0.8669408
-2.0293408 -1.8001508 0.8823620
-2.0346413 -1.6963434 0.8315258
-2.0327906 -1.7122122 0.8378949
-2.0303436 -1.7631756 0.8616497
-2.0300605 -1.7963411 0.8786067
-2.0354697 -1.6940813 0.8298423
-2.0311317 -1.7468890 0.8528050
-2.0318050 -1.7430634 0.8502894
-2.0307247 -1.7929920 0.8755954
-2.0377182 -1.6791851 0.8227348
-2.0369555 -1.6870969 0.8260295
-2.0350438 -1.7029861 0.8323478
-2.0334154 -1.7188176 0.8388738
-2.0308113 -1.7800878 0.8685599
-2.0308582 -1.7845386 0.8707044
-2.0311427 -1.8037405 0.8813566
-2.0316463 -1.7621654 0.8589078
-2.0377385 -1.6848555 0.8243012
-2.0347697 -1.7112640 0.8348693
-2.0328842 -1.7362890 0.8460158
-2.0318036 -1.8006813 0.8781136
-2.0333484 -1.7419056 0.8473440
-2.0370429 -1.7020304 0.8293389
-2.0353649 -1.7178764 0.8358275
-2.0346259 -1.7257764 0.8391405
-2.0324772 -1.7966699 0.8744933
-2.0328437 -1.7843005 0.8669929
-2.0406053 -1.6765619 0.8181847
-2.0346645 -1.7353927 0.8428717
-2.0337809 -1.7524597 0.8508845
-2.0337321 -1.8044253 0.8769761
-2.0403443 -1.6848402 0.8207039
-2.0384805 -1.7007203 0.8270548
-2.0344562 -1.7488608 0.8481247
-2.0340480 -1.7672243 0.8574471
-2.0372205 -1.7167215 0.8329747
-2.0341552 -1.8009831 0.8740147
-2.0421620 -1.6746434 0.8158610
-2.0403046 -1.6905176 0.8222291
-2.0366272 -1.7248270 0.8361357
-2.0356044 -1.7412217 0.8435469
-2.0341801 -1.7766468 0.8607540
-2.0387284 -1.7099517 0.8289151
-2.0367645 -1.7311132 0.8378161
-2.0358271 -1.7470340 0.8451035
-2.0377674 -1.7232517 0.8340017
-2.0423959 -1.6838776 0.8177286
-2.0387642 -1.7156221 0.8305078
-2.0351315 -1.7892558 0.8656172
-2.0352085 -1.7983423 0.8704292
-2.0401267 -1.7086496 0.8266013
-2.0372869 -1.7410495 0.8408512
-2.0360811 -1.8046910 0.8729127
-2.0438940 -1.6825553 0.8154925
-2.0409009 -1.7064126 0.8248821
-2.0387449 -1.7294148 0.8343763
-2.0362455 -1.7865901 0.8620844
-2.0362918 -1.7815790 0.8592726
-2.0395731 -1.7225313 0.8312392
-2.0423951 -1.6994230 0.8210654
-2.0408370 -1.7149145 0.8274006
-2.0384102 -1.7474269 0.8411182
-2.0451650 -1.6809028 0.8135043
-2.0372981 -1.8021780 0.8688069
-2.0394502 -1.7353677 0.8353973
-2.0443911 -1.6891871 0.8163763
-2.0381935 -1.7525771 0.8431006
-2.0405424 -1.7291682 0.8317570
-2.0377364 -1.7811443 0.8561596
-2.0415372 -1.7211459 0.8280985
-2.0425104 -1.7139911 0.8248003
-2.0469379 -1.6793154 0.8109200
-2.0399127 -1.7460016 0.8383220
-2.0389055 -1.7591638 0.8441279
-2.0384062 -1.7866672 0.8581704
-2.0383800 -1.7906114 0.8602773
-2.0407961 -1.7341729 0.8329461
-2.0428513 -1.7192680 0.8257278
-2.0420763 -1.7271765 0.8290149
-2.0441413 -1.7117270 0.8216825
-2.0415692 -1.7407098 0.8340567
-2.0395994 -1.8031535 0.8652993
-2.0453480 -1.7054765 0.8181545
-2.0411533 -1.7535279 0.8386626
-2.0480830 -1.6868320 0.8111678
-2.0408730 -1.7636129 0.8424220
-2.0461561 -1.7031253 0.8160481
-2.0405582 -1.7906834 0.8563731
-2.0419979 -1.7515823 0.8367083
-2.0449631 -1.7186054 0.8224537
-2.0411800 -1.7733264 0.8461646
-2.0410954 -1.7824690 0.8508918
-2.0498332 -1.6854296 0.8086735
-2.0444972 -1.7328739 0.8268445
-2.0426273 -1.7571940 0.8374963
-2.0463758 -1.7175011 0.8200611
-2.0423678 -1.8040937 0.8607006
-2.0430808 -1.7684075 0.8410575
-2.0448643 -1.7434694 0.8297728
-2.0433536 -1.7632143 0.8384843
-2.0427821 -1.7907415 0.8524932
-2.0427287 -1.7954225 0.8551151
-2.0473745 -1.7239921 0.8206194
-2.0443658 -1.7570071 0.8348330
-2.0435642 -1.7733380 0.8423878
-2.0433999 -1.7825036 0.8470655
-2.0435200 -1.7782619 0.8448125
-2.0435600 -1.7875160 0.8493782
-2.0493242 -1.7091462 0.8132917
-2.0451436 -1.7627435 0.8355402
-2.0453985 -1.7682278 0.8374635
-2.0506771 -1.7039202 0.8088334
-2.0453555 -1.7724584 0.8392531
-2.0449786 -1.7999211 0.8533733
-2.0456427 -1.7778905 0.8412549
-2.0456872 -1.7823895 0.8433899
-2.0455534 -1.7871204 0.8459020
-2.0459051 -1.7925349 0.8479460
-2.0471519 -1.7619247 0.8324081
-2.0477326 -1.7680774 0.8338451
-2.0475985 -1.7721897 0.8357265
-2.0497945 -1.7395466 0.8202098
-2.0471657 -1.7999915 0.8494737
-2.0474287 -1.7868855 0.8427123
-2.0472954 -1.8048581 0.8520202
-2.0476709 -1.7818654 0.8399526
-2.0479808 -1.7777871 0.8375813
-2.0478837 -1.7913057 0.8439758
-2.0480117 -1.7968178 0.8464049
-2.0541355 -1.7098790 0.8062698
-2.0494895 -1.7670805 0.8308134
-2.0494200 -1.7768062 0.8349443
-2.0490201 -1.8045384 0.8487886
-2.0494616 -1.7864087 0.8392412
-2.0497658 -1.7823191 0.8368790
-2.0553345 -1.7079237 0.8033284
-2.0503367 -1.7725122 0.8317462
-2.0497041 -1.7906914 0.8406742
-2.0497122 -1.8012966 0.8457428
-2.0499536 -1.7963892 0.8428741
-2.0522929 -1.7452281 0.8180989
-2.0531268 -1.7422947 0.8159399
-2.0518948 -1.7713313 0.8288433
-2.0540849 -1.7386383 0.8133722
-2.0513532 -1.7900618 0.8377344
-2.0516306 -1.7861251 0.8357026
-2.0514511 -1.8044806 0.8446283
-2.0523503 -1.7816613 0.8326109
-2.0519836 -1.8005420 0.8413636
-2.0578441 -1.7136001 0.8012211
-2.0537723 -1.7571175 0.8196401
-2.0523125 -1.7965070 0.8389707
-2.0572461 -1.7225283 0.8036077
-2.0549297 -1.7501830 0.8155836
-2.0541434 -1.7666606 0.8235944
-2.0539364 -1.7762549 0.8278125
-2.0556963 -1.7479630 0.8138757
-2.0539674 -1.7860404 0.8320100
-2.0552862 -1.7556966 0.8169579
-2.0537246 -1.8048354 0.8409077
-2.0567057 -1.7442950 0.8113420
-2.0540893 -1.8012251 0.8380881
-2.0613857 -1.7056552 0.7944353
-2.0593783 -1.7215507 0.8006923
-2.0575607 -1.7413566 0.8091966
-2.0622515 -1.7033849 0.7927763
-2.0557468 -1.7811977 0.8267822
-2.0599271 -1.7281713 0.8016179
-2.0577695 -1.7525559 0.8120789
-2.0576077 -1.7558228 0.8135864
-2.0569333 -1.7722764 0.8216754
-2.0579621 -1.7613981 0.8154452
-2.0576079 -1.7693932 0.8194258
-2.0561027 -1.8002123 0.8339794
-2.0562980 -1.8051552 0.8363934
-2.0642488 -1.7024271 0.7897659
-2.0595655 -1.7466638 0.8078496
-2.0619962 -1.7271501 0.7987174
-2.0662348 -1.6928015 0.7851545
-2.0638206 -1.7113360 0.7922704
-2.0596600 -1.7605604 0.8122199
-2.0649584 -1.7096095 0.7902920
-2.0634961 -1.7258827 0.7964186
-2.0585404 -1.8051585 0.8321866
-2.0609944 -1.7585675 0.8093617
-2.0666947 -1.7087170 0.7877016
-2.0606762 -1.7759949 0.8166553
-2.0686317 -1.6984867 0.7829623
-2.0663824 -1.7169987 0.7901943
-2.0617350 -1.7651434 0.8104066
-2.0598376 -1.8032050 0.8284302
-2.0651732 -1.7327791 0.7963794
-2.0696672 -1.6955131 0.7809417
-2.0682562 -1.7061001 0.7849293
-2.0677304 -1.7157030 0.7878464
-2.0667296 -1.7316262 0.7939822
-2.0690677 -1.7094781 0.7845177
-2.0619636 -1.7902470 0.8176011
-2.0725697 -1.7021706 0.7780774
-2.0712897 -1.7127368 0.7821589
-2.0641815 -1.8032525 0.8207211
-2.0641597 -1.7981861 0.8179431
-2.0644199 -1.7954391 0.8160148
-2.0677362 -1.7547886 0.7956469
-2.0661574 -1.7791818 0.8069388
-2.0661829 -1.8027922 0.8172421
-2.0680595 -1.7686282 0.8001588
-2.0679290 -1.7788466 0.8038416
-2.0673153 -1.7906381 0.8093460
-2.0671129 -1.7998109 0.8140022
-2.0679834 -1.7833796 0.8054463
-2.0682641 -1.8025230 0.8136595
-2.0707487 -1.7602263 0.7934595
-2.0699339 -1.7728836 0.7986293
-2.0691320 -1.7897497 0.8062306
-2.0690239 -1.7942431 0.8083236
-2.0688370 -1.7989573 0.8108366
-2.0743793 -1.7333871 0.7805888
-2.0708126 -1.7710227 0.7966020
-2.0703403 -1.7788574 0.8000827
-2.0701924 -1.7829698 0.8019543
-2.0723557 -1.7594626 0.7906530
-2.0798529 -1.6996692 0.7657184
-2.0709151 -1.7944178 0.8054791
-2.0717947 -1.7778023 0.7975300
-2.0707941 -1.8028213 0.8096197
-2.0732266 -1.7653523 0.7912527
-2.0721390 -1.7826565 0.7989000
-2.0720874 -1.7878764 0.8009901
-2.0746904 -1.7538415 0.7852236
-2.0720553 -1.7921079 0.8027827
-2.0731599 -1.7753477 0.7945299
-2.0768760 -1.7396547 0.7779496
-2.0748146 -1.7649736 0.7887138
-2.0807074 -1.7103083 0.7658593
-2.0793903 -1.7215547 0.7703898
-2.0740096 -1.7818809 0.7956707
-2.0733818 -1.7987427 0.8034497
-2.0824890 -1.7042066 0.7628656
-2.0742057 -1.7874012 0.7975358
-2.0741261 -1.7925258 0.7997286
-2.0754500 -1.7807027 0.7932443
-2.0778608 -1.7516411 0.7797551
-2.0773167 -1.7595020 0.7831959
-2.0769604 -1.7635099 0.7850755
-2.0748128 -1.7977315 0.8008452
-2.0837281 -1.7083395 0.7618680
-2.0780181 -1.7572924 0.7814450
-2.0792020 -1.7457122 0.7760580
-2.0760659 -1.7866659 0.7943609
-2.0772219 -1.7700050 0.7865821
-2.0762897 -1.7917075 0.7960185
-2.0817892 -1.7272361 0.7681968
-2.0757077 -1.8042550 0.8019806
-2.0834951 -1.7165210 0.7634370
-2.0802533 -1.7438365 0.7740821
-2.0854925 -1.7056931 0.7592442
-2.0814836 -1.7354563 0.7703093
-2.0846732 -1.7146604 0.7614686
-2.0834008 -1.7252295 0.7655601
-2.0799592 -1.7569279 0.7784709
-2.0790336 -1.7690919 0.7834580
-2.0798501 -1.7651760 0.7811064
-2.0773597 -1.8034140 0.7987791
-2.0806173 -1.7629494 0.7794036
-2.0792739 -1.7826604 0.7882315
-2.0818220 -1.7505139 0.7735883
-2.0818150 -1.7560080 0.7753696
-2.0863406 -1.7226023 0.7610405
-2.0848985 -1.7331936 0.7650039
-2.0838869 -1.7411396 0.7681220
-2.0882131 -1.7120885 0.7565779
-2.0857900 -1.7309134 0.7633585
-2.0818910 -1.7697877 0.7792798
-2.0814731 -1.7744950 0.7816267
-2.0852769 -1.7398375 0.7658047
-2.0810953 -1.7873072 0.7862620
-2.0879118 -1.7208283 0.7585445
-2.0841922 -1.7561947 0.7719984
-2.0843569 -1.7616760 0.7732893
-2.0836874 -1.7688761 0.7761463
-2.0816011 -1.7978723 0.7892777
-2.0883750 -1.7309186 0.7597386
-2.0831335 -1.7863503 0.7832869
-2.0857115 -1.7548591 0.7691956
-2.0877016 -1.7405400 0.7625482
-2.0912945 -1.7189574 0.7535845
-2.0887425 -1.7375651 0.7605314
-2.0877725 -1.7455110 0.7636841
-2.0907808 -1.7273161 0.7558627
-2.0867785 -1.7616931 0.7695402
-2.0838960 -1.8031728 0.7875207
-2.0928494 -1.7169734 0.7513119
-2.0948684 -1.7031369 0.7460329
-2.0861351 -1.7745636 0.7740050
-2.0851475 -1.7912954 0.7810757
-2.0913203 -1.7375709 0.7569068
-2.0886838 -1.7607543 0.7664733
-2.0855162 -1.8015498 0.7843643
-2.0934096 -1.7273191 0.7522769
-2.0900930 -1.7537816 0.7625848
-2.0928234 -1.7356336 0.7545685
-2.0917501 -1.7442057 0.7577423
-2.0873404 -1.7965436 0.7793149
-2.0897859 -1.7676475 0.7662445
-2.0956735 -1.7234375 0.7486305
-2.0937643 -1.7432465 0.7547442
-2.0928303 -1.7511844 0.7579210
-2.0911958 -1.7663412 0.7639395
-2.0892724 -1.7956084 0.7762712
-2.0925174 -1.7594669 0.7604218
-2.0963336 -1.7339770 0.7494437
-2.0952113 -1.7419354 0.7524672
-2.0921474 -1.7732620 0.7641311
-2.0972411 -1.7316893 0.7477897
-2.0940253 -1.7574665 0.7576907
-2.0915182 -1.7862052 0.7685119
-2.0983794 -1.7300980 0.7456379
-2.0961630 -1.7489342 0.7525546
-2.0912787 -1.8010831 0.7747549
-2.0935905 -1.7721038 0.7616830
-2.0960650 -1.7555413 0.7542642
-2.0997282 -1.7274526 0.7434449
-2.0977237 -1.7469248 0.7498719
-2.0944942 -1.7787245 0.7621823
-2.0996400 -1.7373673 0.7455794
-2.0963070 -1.7631707 0.7554309
-2.0938002 -1.7914461 0.7673353
-2.0949805 -1.7896282 0.7648470
-2.0961459 -1.7779842 0.7593717
-2.1025150 -1.7340801 0.7405524
-2.0967922 -1.7836034 0.7601753
-2.1006156 -1.7529764 0.7469182
-2.1001991 -1.7618822 0.7494215
-2.0980469 -1.7962418 0.7620771
-2.0991209 -1.7893223 0.7579573
-2.1038261 -1.7497355 0.7413168
-2.1015374 -1.7698686 0.7487525
-2.1043357 -1.7529997 0.7413583
-2.1059014 -1.7503836 0.7385970
-2.1014378 -1.7893590 0.7541355
-2.1019579 -1.7954053 0.7555625
-2.1069698 -1.7535737 0.7377112
-2.1043298 -1.7765428 0.7458097
-2.1056471 -1.7742028 0.7444721
-2.1042575 -1.7954455 0.7517298
-2.1087808 -1.7570436 0.7357122
-2.1046453 -1.8016291 0.7530587
-2.1073052 -1.7788871 0.7423962
-2.1074399 -1.7881375 0.7441672
-2.1070006 -1.8016566 0.7492623
-2.1077710 -1.8069614 0.7497758
-2.1155225 -1.7386305 0.7207342
-2.1102037 -1.7937625 0.7422289
-2.1096539 -1.8066033 0.7467507
-2.1119249 -1.7925461 0.7394005
-2.1184399 -1.7360168 0.7162174
-2.1152554 -1.7624606 0.7266184
-2.1182322 -1.7441962 0.7188688
-2.1189639 -1.7413371 0.7159756
-2.1172256 -1.7611867 0.7239460
-2.1212044 -1.7362952 0.7147153
-2.1145091 -1.7982109 0.7373495
-2.1209259 -1.7409890 0.7141912
-2.1205987 -1.7499209 0.7166071
-2.1211766 -1.7464899 0.7142598
-2.1159216 -1.7965345 0.7341935
-2.1199126 -1.7668291 0.7219610
-2.1240505 -1.7426624 0.7121430
-2.1214575 -1.7651474 0.7189029
-2.1230552 -1.7509112 0.7124653
-2.1229510 -1.7555766 0.7138543
-2.1185037 -1.8021999 0.7321419
-2.1262167 -1.7483250 0.7099731
-2.1247549 -1.7545627 0.7114001
-2.1238751 -1.7708282 0.7167358
-2.1263601 -1.7622408 0.7118442
-2.1211022 -1.8032306 0.7274730
-2.1208591 -1.8084863 0.7299925
-2.1274556 -1.7592576 0.7098590
-2.1236839 -1.8088960 0.7254233
-2.1249886 -1.8076132 0.7230531
-2.1304467 -1.7865592 0.7083640
-2.1316778 -1.7935145 0.7086492
-2.1335840 -1.7931723 0.7056616
-2.1358263 -1.7833466 0.7000224
-2.1349186 -1.7912836 0.7032207
-2.1341493 -1.7991973 0.7065134
-2.1356158 -1.7971932 0.7037610
-2.1383279 -1.7833572 0.6963364
-2.1374231 -1.7969627 0.7011071
-2.1384626 -1.7898871 0.6977705
-2.1381447 -1.8028646 0.7016660
-2.1404038 -1.7889399 0.6947243
-2.1413161 -1.7962640 0.6951895
-2.1426268 -1.7943711 0.6927275
-2.1446893 -1.7940116 0.6898534
-2.1477482 -1.7768560 0.6810422
-2.1470234 -1.7997915 0.6876597
-2.1505680 -1.7742453 0.6764344
-2.1480733 -1.7967305 0.6856060
-2.1506136 -1.7799191 0.6780276
-2.1480978 -1.8060080 0.6873088
-2.1478348 -1.8086208 0.6882740
-2.1495926 -1.8046895 0.6850656
-2.1581858 -1.7513463 0.6650035
-2.1493944 -1.8133860 0.6871627
-2.1508070 -1.8029488 0.6831399
-2.1541203 -1.7769476 0.6723049
-2.1538067 -1.7802511 0.6737144
-2.1538034 -1.7865112 0.6753733
-2.1596367 -1.7594968 0.6642142
-2.1561727 -1.7822445 0.6709934
-2.1609814 -1.7580199 0.6620630
-2.1535219 -1.8090521 0.6806542
-2.1623586 -1.7660005 0.6614209
-2.1724835 -1.7897770 0.6484912
-2.1753386 -1.7891259 0.6449661
-2.1752789 -1.7964508 0.6455506
-2.1775157 -1.7965048 0.6416787
-2.1812695 -1.8094976 0.6383469
-2.1834059 -1.8085185 0.6354355
-2.1840276 -1.8154148 0.6360939
-2.1862501 -1.8146037 0.6330456
-2.2138768 -1.8058655 0.5930861
-2.2131506 -1.8178279 0.5953965
-2.2168321 -1.8125254 0.5902730
-2.2178313 -1.8102128 0.5886820
-2.2159420 -1.8244418 0.5925218
-2.2170682 -1.8221769 0.5909613
-2.2197033 -1.8191946 0.5873937
-2.2207291 -1.8168776 0.5858229
-2.2236172 -1.8235441 0.5829568
-1.9657151 -1.8323345 1.0503339
-1.9671217 -1.8349849 1.0501546
-1.9668795 -1.8296299 1.0438310
-1.9682244 -1.8322038 1.0437261
-1.9693764 -1.8347082 1.0439530
-1.9706254 -1.8377831 1.0447102
-1.9699242 -1.8312640 1.0381827
-1.9712796 -1.8338086 1.0381026
-1.9724863 -1.8363729 1.0382748
-1.9707283 -1.8274651 1.0314084
-1.9720635 -1.8305235 1.0321671
-1.9736694 -1.8388016 1.0383149
-1.9747796 -1.8418612 1.0393484
-1.9731587 -1.8329088 1.0325127
-1.9727913 -1.8280866 1.0270246
-1.9746086 -1.8356512 1.0325018
-1.9741366 -1.8306130 1.0269623
-1.9759537 -1.8382638 1.0323585
-1.9735098 -1.8249359 1.0212450
-1.9757000 -1.8339639 1.0274354
-1.9772724 -1.8414634 1.0329902
-1.9750429 -1.8277191 1.0209313
-1.9785394 -1.8438953 1.0330222
-1.9760188 -1.8304454 1.0220029
-1.9797747 -1.8464211 1.0332153
-1.9751566 -1.8235370 1.0158461
-1.9772344 -1.8328820 1.0220320
-1.9796301 -1.8416749 1.0273962
-1.9765893 -1.8262809 1.0155753
-1.9788773 -1.8359388 1.0217265
-1.9764623 -1.8214351 1.0103910
-1.9779278 -1.8290562 1.0155698
-1.9811502 -1.8449993 1.0279025
-1.9804247 -1.8386457 1.0212207
-1.9794099 -1.8324262 1.0160182
-1.9780947 -1.8248800 1.0104692
-1.9825393 -1.8475385 1.0278288
-1.9816957 -1.8413239 1.0212837
-1.9806714 -1.8350320 1.0161586
-1.9795511 -1.8276728 1.0101508
-1.9831282 -1.8444646 1.0219609
-1.9819722 -1.8375923 1.0160622
-1.9795469 -1.8226802 1.0048117
-1.9809850 -1.8311909 1.0107486
-1.9843842 -1.8469087 1.0222322
-1.9833292 -1.8401934 1.0159269
-1.9810526 -1.8262576 1.0053511
-1.9824456 -1.8338381 1.0105770
-1.9857069 -1.8494524 1.0221555
-1.9809160 -1.8212738 1.0000129
-1.9847375 -1.8434764 1.0164697
-1.9824506 -1.8290410 1.0050548
-1.9871962 -1.8526497 1.0227824
-1.9839052 -1.8364395 1.0101552
-1.9858739 -1.8458624 1.0168110
-1.9825645 -1.8246962 1.0001052
-1.9885119 -1.8551114 1.0227844
-1.9839611 -1.8317738 1.0047900
-1.9851899 -1.8391014 1.0102475
-1.9871629 -1.8483272 1.0168093
-1.9824580 -1.8198204 0.9949624
-1.9839341 -1.8275599 1.0000290
-1.9866521 -1.8423910 1.0107747
-1.9854730 -1.8351482 1.0052305
-1.9885812 -1.8515605 1.0174062
-1.9839937 -1.8232791 0.9953144
-1.9880231 -1.8449927 1.0106414
-1.9868490 -1.8378210 1.0050264
-1.9854997 -1.8303274 0.9994242
-1.9899838 -1.8541322 1.0173004
-1.9838104 -1.8180662 0.9901765
-1.9854393 -1.8260050 0.9950576
-1.9892794 -1.8476299 1.0107612
-1.9912822 -1.8566983 1.0174522
-1.9881765 -1.8405217 1.0050828
-1.9869826 -1.8337666 1.0001095
-1.9855334 -1.8210009 0.9894141
-1.9868689 -1.8287669 0.9947672
-1.9925862 -1.8590976 1.0175115
-1.9896212 -1.8438588 1.0055613
-1.9883930 -1.8364463 0.9998977
-1.9869740 -1.8244540 0.9900978
-1.9922081 -1.8538397 1.0111204
-1.9883981 -1.8322097 0.9951405
-1.9910040 -1.8464877 1.0053981
-1.9897448 -1.8390530 0.9997558
-1.9869204 -1.8193539 0.9848546
-1.9883816 -1.8271586 0.9898606
-1.9934692 -1.8562471 1.0111718
-1.9898528 -1.8349097 0.9949079
-1.9912123 -1.8422861 1.0003319
-1.9923483 -1.8491167 1.0052371
-1.9946785 -1.8586089 1.0115189
-1.9896834 -1.8298819 0.9899085
-1.9885449 -1.8222954 0.9843944
-1.9911453 -1.8375811 0.9950131
-1.9935956 -1.8517245 1.0053909
-1.9925051 -1.8449270 1.0004460
-1.9886501 -1.8178636 0.9798448
-1.9911125 -1.8325800 0.9896771
-1.9900443 -1.8257231 0.9847929
-1.9949353 -1.8549002 1.0060269
-1.9925148 -1.8401485 0.9949075
-1.9937944 -1.8475352 1.0003200
-1.9900606 -1.8205609 0.9796122
-1.9912588 -1.8282005 0.9847684
-1.9938377 -1.8434136 0.9957439
-1.9961883 -1.8573076 1.0060708
-1.9927076 -1.8359067 0.9898562
-1.9952123 -1.8501752 1.0001460
-1.9912804 -1.8236900 0.9802640
-1.9950618 -1.8458605 0.9957544
-1.9925740 -1.8307407 0.9846862
-1.9940085 -1.8385624 0.9899814
-1.9966501 -1.8535341 1.0008877
-1.9910070 -1.8181872 0.9753969
-1.9983663 -1.8616820 1.0068752
-1.9926494 -1.8263297 0.9800871
-1.9938631 -1.8340964 0.9854408
-1.9962955 -1.8483062 0.9957661
-1.9997242 -1.8646445 1.0079766
-1.9952614 -1.8410239 0.9899765
-1.9979806 -1.8560691 1.0008139
-1.9924321 -1.8208741 0.9751752
-1.9920625 -1.8160480 0.9713117
-1.9965036 -1.8442141 0.9908855
-1.9977002 -1.8515136 0.9963662
-1.9940727 -1.8289960 0.9798860
-1.9991361 -1.8585063 1.0011141
-1.9954111 -1.8366944 0.9850033
-1.9937259 -1.8242646 0.9759249
-1.9953477 -1.8323793 0.9806164
-1.9935157 -1.8187574 0.9710393
-2.0003350 -1.8607548 1.0013060
-1.9991875 -1.8541595 0.9961847
-1.9978051 -1.8465826 0.9906592
-1.9968577 -1.8395197 0.9849534
-1.9951741 -1.8269513 0.9756782
-2.0013952 -1.8635364 1.0023288
-1.9964648 -1.8349305 0.9808298
-1.9989549 -1.8490835 0.9909133
-1.9948345 -1.8213388 0.9709145
-1.9981813 -1.8422392 0.9850002
-2.0007236 -1.8568575 0.9959531
-1.9946211 -1.8165830 0.9669632
-2.0000034 -1.8513998 0.9913415
-2.0032065 -1.8675518 1.0037514
-1.9965290 -1.8296238 0.9754696
-1.9977496 -1.8374883 0.9807319
-1.9960285 -1.8246794 0.9716832
-1.9993955 -1.8452880 0.9857313
-2.0021042 -1.8595430 0.9960202
-1.9958833 -1.8192218 0.9667787
-2.0012274 -1.8537794 0.9914010
-1.9973397 -1.8272596 0.9715611
-1.9991861 -1.8402729 0.9804200
-2.0033253 -1.8620091 0.9960154
-1.9970890 -1.8224847 0.9673229
-2.0026533 -1.8572189 0.9920853
-1.9989376 -1.8356790 0.9760123
-1.9968601 -1.8169518 0.9624833
-1.9985864 -1.8299746 0.9713336
-2.0045426 -1.8650227 0.9968100
-2.0008570 -1.8438651 0.9806655
-2.0044681 -1.8600422 0.9914442
-2.0023852 -1.8465640 0.9801437
-2.0060721 -1.8635463 0.9917761
-2.0021227 -1.8407862 0.9732350
-2.0077249 -1.8710781 0.9960015
-2.0019418 -1.8360379 0.9689636
-2.0048506 -1.8514185 0.9791892
-2.0091169 -1.8745220 0.9963936
-2.0021630 -1.8309821 0.9633675
-2.0042060 -1.8447905 0.9727846
-2.0061831 -1.8542324 0.9791414
-2.0036670 -1.8391304 0.9680701
-2.0035043 -1.8346333 0.9638624
-2.0017282 -1.8219352 0.9547131
-2.0085699 -1.8638512 0.9850445
-2.0075083 -1.8569036 0.9789402
-2.0050390 -1.8421469 0.9678417
-2.0033415 -1.8293189 0.9588196
-2.0066360 -1.8499592 0.9728355
-2.0048199 -1.8373612 0.9636014
-2.0072323 -1.8524849 0.9743728
-2.0114438 -1.8752282 0.9916513
-2.0087467 -1.8595000 0.9790864
-2.0101347 -1.8664555 0.9846265
-2.0063148 -1.8455745 0.9685262
-2.0022664 -1.8136395 0.9463596
-2.0034543 -1.8250176 0.9538233
-2.0047010 -1.8327506 0.9591927
-2.0059111 -1.8398463 0.9635691
-2.0085939 -1.8551481 0.9741807
-2.0100572 -1.8627045 0.9797052
-2.0115130 -1.8690730 0.9847423
-2.0133704 -1.8783886 0.9909655
-2.0078527 -1.8484324 0.9681411
-2.0048823 -1.8279444 0.9536914
-2.0059631 -1.8354558 0.9589530
-2.0072640 -1.8433598 0.9641764
-2.0101817 -1.8580720 0.9737430
-2.0060747 -1.8306188 0.9537946
-2.0044443 -1.8174102 0.9448220
-2.0090980 -1.8510321 0.9680040
-2.0071292 -1.8379740 0.9588898
-2.0055630 -1.8256232 0.9497441
-2.0122398 -1.8672178 0.9801156
-2.0087201 -1.8461938 0.9638182
-2.0046230 -1.8141657 0.9416908
-2.0102512 -1.8540736 0.9687652
-2.0073414 -1.8338715 0.9543320
-2.0082114 -1.8405539 0.9590773
-2.0115600 -1.8607565 0.9735303
-2.0068986 -1.8283007 0.9495286
-2.0137405 -1.8700325 0.9797808
-2.0062583 -1.8208737 0.9438936
-2.0101181 -1.8490812 0.9634248
-2.0127893 -1.8639906 0.9743982
-2.0114577 -1.8566523 0.9686564
-2.0061055 -1.8172522 0.9410869
-2.0088579 -1.8366759 0.9536917
-2.0137811 -1.8664441 0.9746900
-2.0151809 -1.8736277 0.9802934
-2.0082641 -1.8310994 0.9492000
-2.0171592 -1.8820902 0.9859830
-2.0116344 -1.8526555 0.9636756
-2.0078760 -1.8247357 0.9438525
-2.0075927 -1.8204096 0.9407882
-2.0097576 -1.8347082 0.9494065
-2.0171305 -1.8770779 0.9793237
-2.0094380 -1.8278420 0.9432353
-2.0081890 -1.8128445 0.9330233
-2.0115114 -1.8419511 0.9523671
-2.0094365 -1.8243391 0.9403539
-2.0111700 -1.8376259 0.9489866
-2.0142186 -1.8570616 0.9618512
-2.0185062 -1.8797556 0.9791217
-2.0159931 -1.8651377 0.9665889
-2.0110528 -1.8317416 0.9431825
-2.0129726 -1.8450619 0.9517617
-2.0200837 -1.8830672 0.9796367
-2.0094392 -1.8099522 0.9280176
-2.0143709 -1.8528223 0.9567951
-2.0181706 -1.8745785 0.9726476
-2.0112777 -1.8278464 0.9393930
-2.0159899 -1.8602011 0.9609035
-2.0174189 -1.8678040 0.9661067
-2.0127070 -1.8349543 0.9424878
-2.0144111 -1.8479241 0.9513758
-2.0195864 -1.8772137 0.9724790
-2.0215486 -1.8857008 0.9794668
-2.0157694 -1.8556113 0.9564789
-2.0112606 -1.8142533 0.9275847
-2.0186881 -1.8704736 0.9661887
-2.0129466 -1.8313675 0.9384335
-2.0156449 -1.8513246 0.9520884
-2.0176016 -1.8638792 0.9610677
-2.0140643 -1.8380220 0.9422374
-2.0170654 -1.8584318 0.9564526
-2.0213832 -1.8812456 0.9736252
-2.0188631 -1.8665522 0.9611559
-2.0168792 -1.8538291 0.9520394
-2.0157516 -1.8462939 0.9464700
-2.0227040 -1.8843664 0.9745831
-2.0152601 -1.8407360 0.9419838
-2.0146175 -1.8352945 0.9383302
-2.0184380 -1.8611566 0.9561960
-2.0211571 -1.8760260 0.9671821
-2.0199729 -1.8688942 0.9612666
-2.0135148 -1.8182408 0.9258451
-2.0182696 -1.8564786 0.9518540
-2.0241963 -1.8869129 0.9744891
-2.0164816 -1.8439795 0.9425156
-2.0174314 -1.8491842 0.9460763
-2.0138058 -1.8132876 0.9217956
-2.0199584 -1.8645993 0.9565521
-2.0212562 -1.8714084 0.9612031
-2.0164157 -1.8387234 0.9374152
-2.0235064 -1.8806127 0.9675082
-2.0178488 -1.8465841 0.9423735
-2.0189714 -1.8527579 0.9466291
-2.0257638 -1.8894976 0.9741110
-2.0199827 -1.8593684 0.9511341
-2.0212757 -1.8673750 0.9565605
-2.0144796 -1.8098221 0.9176626
-2.0149615 -1.8160255 0.9214878
-2.0166031 -1.8341500 0.9330023
-2.0227048 -1.8746450 0.9617851
-2.0249330 -1.8837610 0.9681830
-2.0190713 -1.8491605 0.9425810
-2.0164683 -1.8286093 0.9281927
-2.0203115 -1.8554088 0.9464422
-2.0239019 -1.8771204 0.9620548
-2.0215533 -1.8630804 0.9515737
-2.0226213 -1.8699583 0.9564383
-2.0161715 -1.8187425 0.9212072
-2.0260520 -1.8861301 0.9685361
-2.0180454 -1.8370956 0.9325311
-2.0161290 -1.8137396 0.9175872
-2.0203569 -1.8521392 0.9430750
-2.0250717 -1.8795488 0.9623600
-2.0173221 -1.8260178 0.9245161
-2.0216019 -1.8580135 0.9462979
-2.0239534 -1.8724976 0.9563591
-2.0229561 -1.8657801 0.9513411
-2.0164778 -1.8105613 0.9143354
-2.0201663 -1.8459023 0.9369131
-2.0176800 -1.8225290 0.9212454
-2.0194986 -1.8406018 0.9328479
-2.0262480 -1.8818632 0.9625005
-2.0174456 -1.8166561 0.9171231
-2.0218373 -1.8549222 0.9427628
-2.0284449 -1.8907683 0.9690887
-2.0253390 -1.8756928 0.9569738
-2.0187779 -1.8289699 0.9240304
-2.0272621 -1.8847314 0.9637175
-2.0213675 -1.8483465 0.9369171
-2.0243190 -1.8684294 0.9511572
-2.0177892 -1.8134524 0.9139387
-2.0197247 -1.8355350 0.9275917
-2.0235820 -1.8619907 0.9461805
-2.0294192 -1.8929557 0.9696022
-2.0208292 -1.8433728 0.9328674
-2.0193174 -1.8259528 0.9207346
-2.0232597 -1.8576709 0.9425012
-2.0284896 -1.8871029 0.9638069
-2.0267425 -1.8782415 0.9568870
-2.0190628 -1.8198567 0.9164124
-2.0256026 -1.8711227 0.9512316
-2.0207716 -1.8378431 0.9277090
-2.0203169 -1.8319743 0.9235025
-2.0220616 -1.8458378 0.9328509
-2.0248578 -1.8645777 0.9460522
-2.0193906 -1.8166258 0.9132545
-2.0190494 -1.8112027 0.9095917
-2.0297716 -1.8895348 0.9638385
-2.0280185 -1.8808491 0.9570269
-2.0248000 -1.8611548 0.9428260
-2.0269774 -1.8744533 0.9520037
-2.0220637 -1.8413454 0.9283293
-2.0259655 -1.8671298 0.9462639
-2.0239992 -1.8540118 0.9371996
-2.0205190 -1.8237742 0.9166879
-2.0232581 -1.8489115 0.9335580
-2.0210496 -1.8299927 0.9205057
-2.0217701 -1.8357540 0.9238952
-2.0309794 -1.8918447 0.9639897
-2.0294260 -1.8840324 0.9576591
-2.0200410 -1.8089320 0.9059922
-2.0262634 -1.8641202 0.9426765
-2.0283440 -1.8770343 0.9518837
-2.0211747 -1.8207331 0.9130076
-2.0246395 -1.8515564 0.9333764
-2.0235653 -1.8441481 0.9280002
-2.0273817 -1.8698742 0.9459683
-2.0255675 -1.8569332 0.9367583
-2.0219514 -1.8265273 0.9160244
-2.0306376 -1.8864859 0.9576718
-2.0226741 -1.8329031 0.9197236
-2.0233998 -1.8386205 0.9231637
-2.0297303 -1.8796092 0.9517689
-2.0278619 -1.8670897 0.9421704
-2.0250539 -1.8469196 0.9277003
-2.0287883 -1.8725649 0.9457441
-2.0269588 -1.8596983 0.9364617
-2.0339429 -1.8977311 0.9646410
-2.0321059 -1.8892811 0.9576168
-2.0219985 -1.8123414 0.9047828
-2.0234303 -1.8297967 0.9156423
-2.0218003 -1.8079376 0.9018064
-2.0240948 -1.8360118 0.9194840
-2.0230769 -1.8240721 0.9118657
-2.0248290 -1.8414393 0.9228139
-2.0311482 -1.8829137 0.9522811
-2.0229829 -1.8191816 0.9080835
-2.0301818 -1.8759354 0.9464959
-2.0263845 -1.8504231 0.9283390
-2.0292851 -1.8698730 0.9418602
-2.0285895 -1.8634741 0.9368248
-2.0335663 -1.8919487 0.9574113
-2.0262109 -1.8450253 0.9233810
-2.0324935 -1.8854794 0.9521798
-2.0257788 -1.8398728 0.9194698
-2.0251115 -1.8335187 0.9153599
-2.0247984 -1.8283229 0.9118441
-2.0305957 -1.8733025 0.9425648
-2.0239740 -1.8157442 0.9035836
-2.0316611 -1.8784788 0.9461153
-2.0245014 -1.8222819 0.9074626
-2.0278707 -1.8530693 0.9278384
-2.0238152 -1.8122146 0.9010336
-2.0349812 -1.8951837 0.9580035
-2.0290797 -1.8596154 0.9317538
-2.0338256 -1.8880252 0.9521000
-2.0276726 -1.8478459 0.9230324
-2.0304426 -1.8669068 0.9362356
-2.0329824 -1.8810993 0.9459611
-2.0320455 -1.8758876 0.9421446
-2.0254560 -1.8198014 0.9037256
-2.0362947 -1.8975981 0.9580469
-2.0275716 -1.8428706 0.9186305
-2.0294297 -1.8559995 0.9274085
-2.0350844 -1.8906552 0.9522180
-2.0271255 -1.8371163 0.9143370
-2.0261474 -1.8255373 0.9067451
-2.0305771 -1.8623181 0.9312017
-2.0256793 -1.8157626 0.9000609
-2.0253796 -1.8104888 0.8966465
-2.0343808 -1.8844545 0.9467115
-2.0292239 -1.8506118 0.9224115
-2.0321790 -1.8698497 0.9354610
-2.0335263 -1.8786306 0.9418880
-2.0365100 -1.8939804 0.9527190
-2.0268912 -1.8228146 0.9031798
-2.0383527 -1.9018617 0.9589631
-2.0292217 -1.8461297 0.9182331
-2.0318306 -1.8650870 0.9312160
-2.0288827 -1.8410378 0.9142679
-2.0356942 -1.8869971 0.9466390
-2.0278546 -1.8295901 0.9065426
-2.0306734 -1.8542595 0.9229200
-2.0316024 -1.8602896 0.9270009
-2.0350410 -1.8821367 0.9422095
-2.0379528 -1.8965530 0.9526070
-2.0271399 -1.8136981 0.8955566
-2.0330529 -1.8676542 0.9311041
-2.0306286 -1.8495529 0.9186006
-2.0271050 -1.8101034 0.8930846
-2.0370166 -1.8895479 0.9465510
-2.0284757 -1.8260165 0.9024670
-2.0298805 -1.8387899 0.9102630
-2.0321774 -1.8570978 0.9225565
-2.0350374 -1.8761649 0.9357487
-2.0330799 -1.8631391 0.9266262
-2.0305934 -1.8442060 0.9135977
-2.0392334 -1.8990711 0.9528100
-2.0364990 -1.8850037 0.9421112
-2.0295386 -1.8328279 0.9058424
-2.0382151 -1.8921487 0.9466974
-2.0286152 -1.8177677 0.8956889
-2.0320739 -1.8523694 0.9182554
-2.0291003 -1.8231962 0.8989836
-2.0350561 -1.8729416 0.9323488
-2.0284905 -1.8069031 0.8884158
-2.0377912 -1.8876737 0.9421979
-2.0363196 -1.8787744 0.9355974
-2.0405687 -1.9015074 0.9528388
-2.0313089 -1.8416155 0.9099039
-2.0335799 -1.8598463 0.9222752
-2.0301806 -1.8300447 0.9022880
-2.0345499 -1.8660430 0.9261992
-2.0321369 -1.8471622 0.9131473
-2.0292152 -1.8137799 0.8916317
-2.0310798 -1.8359195 0.9052328
-2.0396734 -1.8954681 0.9472001
-2.0335337 -1.8552000 0.9178976
-2.0417450 -1.9037712 0.9530330
-2.0308771 -1.8266055 0.8981303
-2.0303642 -1.8209035 0.8946789
-2.0367388 -1.8760951 0.9316895
-2.0391709 -1.8901818 0.9418681
-2.0377206 -1.8815754 0.9352675
-2.0351391 -1.8634313 0.9225015
-2.0335637 -1.8506126 0.9134886
-2.0328827 -1.8446407 0.9093637
-2.0359579 -1.8688605 0.9258538
-2.0302559 -1.8112757 0.8878961
-2.0410636 -1.8980524 0.9470828
-2.0320778 -1.8333489 0.9011798
-2.0350727 -1.8580928 0.9175061
-2.0404493 -1.8934729 0.9426873
-2.0382020 -1.8790761 0.9315134
-2.0307315 -1.8071319 0.8843698
-2.0312342 -1.8175760 0.8904413
-2.0392195 -1.8850794 0.9355928
-2.0422806 -1.9006176 0.9472455
-2.0373799 -1.8722498 0.9262686
-2.0349423 -1.8534452 0.9131254
-2.0320197 -1.8241644 0.8939601
-2.0325476 -1.8305468 0.8979920
-2.0344106 -1.8483165 0.9095179
-2.0367598 -1.8665642 0.9218818
-2.0336586 -1.8420608 0.9053119
-2.0416652 -1.8959932 0.9429066
-2.0336892 -1.8374269 0.9013098
-2.0436186 -1.9031089 0.9472248
-2.0397673 -1.8825967 0.9315131
-2.0407746 -1.8880021 0.9351478
-2.0334597 -1.8281038 0.8942127
-2.0329792 -1.8216821 0.8901864
-2.0429570 -1.8984929 0.9428756
-2.0324956 -1.8114951 0.8838590
-2.0351890 -1.8451332 0.9047549
-2.0360194 -1.8514153 0.9089100
-2.0383841 -1.8696996 0.9212593
-2.0343466 -1.8339056 0.8971889
-2.0448599 -1.9054595 0.9473334
-2.0351987 -1.8404792 0.9007366
-2.0421432 -1.8907127 0.9351858
-2.0441298 -1.9010341 0.9430680
-2.0461070 -1.9084193 0.9484293
-2.0352207 -1.8311660 0.8932818
-2.0400681 -1.8733342 0.9214425
-2.0344514 -1.8187665 0.8852410
-2.0420306 -1.8862994 0.9303361
-2.0347723 -1.8249108 0.8890908
-2.0375455 -1.8544341 0.9080628
-2.0434656 -1.8932924 0.9350686
-2.0345198 -1.8153177 0.8826480
-2.0456790 -1.9042331 0.9434325
-2.0362526 -1.8372541 0.8960376
-2.0447482 -1.8965105 0.9359441
-2.0355947 -1.8221562 0.8855645
-2.0439196 -1.8914205 0.9317569
-2.0363723 -1.8289787 0.8892392
-2.0471077 -1.9067365 0.9433885
-2.0368921 -1.8344424 0.8925061
-2.0355271 -1.8088149 0.8764440
-2.0363104 -1.8195402 0.8822814
-2.0380019 -1.8413430 0.8958047
-2.0460615 -1.8988491 0.9357829
-2.0482732 -1.9091382 0.9436939
-2.0398914 -1.8593513 0.9070681
-2.0454183 -1.8942162 0.9314367
-2.0373895 -1.8255745 0.8847101
-2.0380509 -1.8321790 0.8885390
-2.0385649 -1.8384485 0.8923441
-2.0495124 -1.9114225 0.9438641
-2.0472353 -1.9012549 0.9358416
-2.0411858 -1.8624125 0.9068447
-2.0377698 -1.8223342 0.8815610
-2.0397255 -1.8447371 0.8949600
-2.0468329 -1.8968797 0.9312453
-2.0405347 -1.8512407 0.8985333
-2.0412296 -1.8576188 0.9026139
-2.0434389 -1.8758221 0.9150035
-2.0459002 -1.8899649 0.9253814
-2.0485049 -1.9036751 0.9358818
-2.0391597 -1.8296199 0.8845205
-2.0380423 -1.8093609 0.8721293
-2.0396988 -1.8352768 0.8875998
-2.0497129 -1.9068293 0.9370681
-2.0450999 -1.8839569 0.9196985
-2.0432740 -1.8712860 0.9105418
-2.0481912 -1.8994505 0.9311397
-2.0404279 -1.8417346 0.8912470
-2.0426762 -1.8654265 0.9063103
-2.0470721 -1.8929698 0.9261799
-2.0417870 -1.8542063 0.8984108
-2.0391237 -1.8200706 0.8772305
-2.0447717 -1.8784992 0.9147886
-2.0425178 -1.8603845 0.9023047
-2.0415304 -1.8489755 0.8945856
-2.0398738 -1.8262028 0.8803058
-2.0510046 -1.9091850 0.9371613
-2.0493761 -1.9018973 0.9314268
-2.0466236 -1.8866864 0.9194378
-2.0408468 -1.8329274 0.8837579
-2.0393316 -1.8068155 0.8680716
-2.0483764 -1.8954904 0.9261235
-2.0442811 -1.8690874 0.9064842
-2.0414291 -1.8393466 0.8873824
-2.0450813 -1.8743833 0.9099419
-2.0421586 -1.8453140 0.8905997
-2.0401711 -1.8174840 0.8735741
-2.0438692 -1.8631720 0.9019802
-2.0432722 -1.8571916 0.8978995
-2.0523108 -1.9115215 0.9372859
-2.0506994 -1.9049915 0.9321578
-2.0496632 -1.8981426 0.9262246
-2.0404884 -1.8132725 0.8700842
-2.0409900 -1.8236846 0.8762002
-2.0431582 -1.8522098 0.8938427
-2.0416280 -1.8302626 0.8800996
-2.0518589 -1.9073625 0.9325122
-2.0534834 -1.9138834 0.9376478
-2.0458435 -1.8719490 0.9061004
-2.0465611 -1.8771414 0.9096519
-2.0476884 -1.8849219 0.9149821
-2.0425893 -1.8360811 0.8827337
-2.0454551 -1.8661589 0.9015062
-2.0449195 -1.8609831 0.8979187
-2.0529994 -1.9097040 0.9328907
-2.0414904 -1.8106284 0.8664871
-2.0435217 -1.8431502 0.8861825
-2.0511627 -1.9008240 0.9260089
-2.0439652 -1.8493245 0.8900321
-2.0546268 -1.9161380 0.9378525
-2.0414866 -1.8069121 0.8641413
-2.0478100 -1.8797099 0.9095367
-2.0433052 -1.8336779 0.8792303
-2.0449529 -1.8553142 0.8928850
-2.0491626 -1.8876705 0.9147020
-2.0474529 -1.8748347 0.9056949
-2.0506206 -1.8949683 0.9201758
-2.0444930 -1.8455893 0.8861446
-2.0525166 -1.9039917 0.9266581
-2.0441631 -1.8401930 0.8827917
-2.0542962 -1.9119153 0.9328780
-2.0464201 -1.8638638 0.8975407
-2.0430058 -1.8183873 0.8690119
-2.0472956 -1.8698079 0.9013394
-2.0459932 -1.8586421 0.8936896
-2.0491858 -1.8830706 0.9099751
-2.0456103 -1.8525611 0.8893364
-2.0517979 -1.8973221 0.9202767
-2.0535979 -1.9063774 0.9270047
-2.0440632 -1.8306494 0.8755386
-2.0438531 -1.8253921 0.8721161
-2.0506718 -1.8903406 0.9144946
-2.0434315 -1.8104882 0.8627545
-2.0491387 -1.8783920 0.9056198
-2.0451273 -1.8368944 0.8781518
-2.0461183 -1.8498571 0.8860972
-2.0528993 -1.8997013 0.9206376
-2.0565260 -1.9169637 0.9343675
-2.0504026 -1.8857218 0.9101158
-2.0479921 -1.8667820 0.8971028
-2.0487790 -1.8727987 0.9011926
-2.0459749 -1.8436663 0.8818823
-2.0474799 -1.8615076 0.8932986
-2.0548426 -1.9087302 0.9271146
-2.0446804 -1.8217100 0.8681884
-2.0441025 -1.8076587 0.8597071
-2.0471439 -1.8558367 0.8889482
-2.0521303 -1.8936458 0.9149989
-2.0458115 -1.8348587 0.8751870
-2.0541637 -1.9021123 0.9206832
-2.0507067 -1.8815152 0.9053352
-2.0451262 -1.8184837 0.8650770
-2.0456787 -1.8289180 0.8711666
-2.0560454 -1.9110690 0.9272363
-2.0518759 -1.8884977 0.9098109
-2.0501410 -1.8755067 0.9009183
-2.0452649 -1.8148303 0.8622799
-2.0467503 -1.8409124 0.8779721
-2.0490323 -1.8644120 0.8928751
-2.0534741 -1.8961598 0.9149441
-2.0498407 -1.8704321 0.8969362
-2.0461439 -1.8247834 0.8675794
-2.0554724 -1.9054343 0.9214650
-2.0574544 -1.9141379 0.9282382
-2.0457189 -1.8118271 0.8593589
-2.0463009 -1.8214972 0.8649429
-2.0479221 -1.8479764 0.8810761
-2.0521435 -1.8842813 0.9050370
-2.0515098 -1.8788660 0.9013474
-2.0532848 -1.8911501 0.9096228
-2.0475032 -1.8382348 0.8743614
-2.0547185 -1.8985951 0.9149666
-2.0566318 -1.9079643 0.9216760
-2.0472077 -1.8285008 0.8680031
-2.0474815 -1.8324607 0.8701901
-2.0505815 -1.8672880 0.8924779
-2.0483266 -1.8441828 0.8772764
-2.0469806 -1.8184513 0.8616369
-2.0500310 -1.8623342 0.8887020
-2.0592960 -1.9180652 0.9294918
-2.0474142 -1.8246294 0.8650878
-2.0468544 -1.8081655 0.8550555
-2.0559175 -1.9011391 0.9151732
-2.0535111 -1.8869673 0.9048158
-2.0576869 -1.9102098 0.9218916
-2.0548309 -1.8945560 0.9100310
-2.0475639 -1.8150688 0.8582340
-2.0479293 -1.8208921 0.8615688
-2.0497019 -1.8515437 0.8800707
-2.0520997 -1.8709385 0.8929941
-2.0491099 -1.8415624 0.8735291
-2.0514155 -1.8658309 0.8890195
-2.0547062 -1.8903050 0.9055890
-2.0613470 -1.9222683 0.9304519
-2.0572546 -1.9042674 0.9158554
-2.0492403 -1.8367565 0.8697467
-2.0561391 -1.8972483 0.9101029
-2.0487728 -1.8276963 0.8644690
-2.0491336 -1.8319442 0.8667514
-2.0484796 -1.8115304 0.8542402
-2.0548683 -1.8852455 0.9003291
-2.0583193 -1.9068167 0.9160599
-2.0558653 -1.8927781 0.9055724
-2.0494067 -1.8185267 0.8573645
-2.0511638 -1.8497985 0.8756749
-2.0574454 -1.8998300 0.9099846
-2.0514901 -1.8551299 0.8790463
-2.0507388 -1.8456401 0.8732925
-2.0498837 -1.8250753 0.8608084
-2.0595031 -1.9093030 0.9160402
-2.0610786 -1.9168150 0.9215843
-2.0571951 -1.8954409 0.9053782
-2.0501037 -1.8155329 0.8540068
-2.0564068 -1.8887674 0.9003046
-2.0511085 -1.8367848 0.8658505
-2.0607387 -1.9124106 0.9167611
-2.0511568 -1.8226819 0.8570597
-2.0513839 -1.8282761 0.8601877
-2.0532275 -1.8594247 0.8786091
-2.0521597 -1.8438079 0.8689764
-2.0524998 -1.8491147 0.8723750
-2.0623513 -1.9196211 0.9212615
-2.0586934 -1.8988867 0.9057622
-2.0509371 -1.8078702 0.8475727
-2.0577629 -1.8915345 0.9000136
-2.0513750 -1.8129070 0.8500218
-2.0534229 -1.8552755 0.8750479
-2.0542014 -1.8655752 0.8812920
-2.0517881 -1.8188326 0.8532669
-2.0635429 -1.9222224 0.9211558
-2.0518688 -1.8106025 0.8476906
-2.0534782 -1.8408910 0.8640064
-2.0592804 -1.8947480 0.8996128
-2.0617281 -1.9089023 0.9099841
-2.0550294 -1.8630174 0.8775793
-2.0527304 -1.8162327 0.8496182
-2.0558204 -1.8695591 0.8811487
-2.0542692 -1.8475477 0.8674621
-2.0533800 -1.8229851 0.8529356
-2.0610826 -1.9028151 0.9043704
-2.0549815 -1.8543245 0.8711474
-2.0530531 -1.8080836 0.8440170
-2.0552905 -1.8595398 0.8742800
-2.0609725 -1.8978392 0.8990174
-2.0623895 -1.9054323 0.9042191
-2.0568596 -1.8672889 0.8771726
-2.0653231 -1.9210446 0.9155672
-2.0575358 -1.8728651 0.8803465
-2.0561431 -1.8512021 0.8663853
-2.0569785 -1.8630978 0.8736483
-2.0595137 -1.8859418 0.8888193
-2.0664849 -1.9235292 0.9158092
-2.0625685 -1.9014371 0.8992460
-2.0636506 -1.9079990 0.9041166
-2.0651068 -1.9156231 0.9095821
-2.0564956 -1.8479080 0.8632876
-2.0553658 -1.8079726 0.8398867
-2.0609954 -1.8894341 0.8894567
-2.0577056 -1.8586475 0.8687804
-2.0586116 -1.8704073 0.8761935
-2.0592598 -1.8768083 0.8802530
-2.0677703 -1.9266968 0.9167392
-2.0648255 -1.9112730 0.9049498
-2.0578077 -1.8553460 0.8660869
-2.0638599 -1.9040192 0.8991276
-2.0665420 -1.9183109 0.9093601
-2.0588040 -1.8663894 0.8725031
-2.0689049 -1.9290654 0.9170913
-2.0580586 -1.8511912 0.8625349
-2.0623636 -1.8921016 0.8892562
-2.0634921 -1.8994198 0.8947197
-2.0599099 -1.8733603 0.8760927
-2.0660128 -1.9137375 0.9049466
-2.0649604 -1.9065000 0.8994014
-2.0580228 -1.8460255 0.8586545
-2.0678158 -1.9207838 0.9093457
-2.0701204 -1.9313744 0.9172385
-2.0576239 -1.8362840 0.8518957
-2.0595535 -1.8629384 0.8683598
-2.0621896 -1.8876476 0.8847046
-2.0635698 -1.8947077 0.8894136
-2.0594968 -1.8587197 0.8652162
-2.0605810 -1.8706728 0.8724522
-2.0661946 -1.9089999 0.8993607
-2.0650341 -1.9022352 0.8943792
-2.0674581 -1.9164207 0.9047324
-2.0689296 -1.9231984 0.9096649
-2.0615391 -1.8764439 0.8754973
-2.0596998 -1.8544998 0.8617233
-2.0625813 -1.8829342 0.8791289
-2.0636301 -1.8903377 0.8844821
-2.0648550 -1.8972620 0.8893192
-2.0598721 -1.8495107 0.8576992
-2.0687826 -1.9190741 0.9048314
-2.0674587 -1.9115702 0.8992538
-2.0706403 -1.9278058 0.9115870
-2.0664133 -1.9050108 0.8943733
-2.0613982 -1.8664754 0.8673907
-2.0612915 -1.8622208 0.8642819
-2.0623221 -1.8739520 0.8717123
-2.0593828 -1.8306984 0.8449537
-2.0603470 -1.8464549 0.8544251
-2.0593987 -1.8259081 0.8419296
-2.0601087 -1.8413986 0.8508023
-2.0639418 -1.8855945 0.8789258
-2.0631980 -1.8800528 0.8753457
-2.0663038 -1.9006032 0.8897901
-2.0613722 -1.8585712 0.8614942
-2.0650461 -1.8930510 0.8842391
-2.0687538 -1.9148837 0.9000469
-2.0701056 -1.9221503 0.9055658
-2.0718488 -1.9301205 0.9117291
-2.0677303 -1.9075762 0.8942698
-2.0615716 -1.8535247 0.8575315
-2.0731271 -1.9324810 0.9118255
-2.0645975 -1.8830668 0.8751752
-2.0700915 -1.9174730 0.8999219
-2.0677214 -1.9033078 0.8895545
-2.0664409 -1.8957351 0.8840241
-2.0716128 -1.9248167 0.9053643
-2.0641268 -1.8777668 0.8713666
-2.0689619 -1.9100955 0.8942101
-2.0621193 -1.8505248 0.8541689
-2.0632711 -1.8664413 0.8635624
-2.0611612 -1.8344338 0.8437907
-2.0611402 -1.8306027 0.8415058
-2.0614854 -1.8399651 0.8469440
-2.0662407 -1.8913059 0.8797644
-2.0632217 -1.8620933 0.8605496
-2.0743676 -1.9348623 0.9121586
-2.0631620 -1.8567340 0.8568581
-2.0677999 -1.8991347 0.8847421
-2.0728784 -1.9273520 0.9055642
-2.0702384 -1.9133996 0.8950134
-2.0646295 -1.8749024 0.8679098
-2.0714570 -1.9200883 0.8997727
-2.0691521 -1.9059691 0.8893597
-2.0662098 -1.8860758 0.8746517
-2.0618054 -1.8076770 0.8273939
-2.0656547 -1.8807258 0.8709191
-2.0676845 -1.8940484 0.8794917
-2.0638479 -1.8538118 0.8534351
-2.0743616 -1.9310587 0.9070279
-2.0690727 -1.9018178 0.8848341
-2.0703786 -1.9086490 0.8894526
-2.0651140 -1.8699343 0.8626346
-2.0715856 -1.9159746 0.8949008
-2.0728134 -1.9226561 0.8996719
-2.0647076 -1.8598860 0.8561873
-2.0631562 -1.8378279 0.8425433
-2.0630414 -1.8343262 0.8403804
-2.0636356 -1.8443521 0.8464736
-2.0651435 -1.8664795 0.8600426
-2.0664586 -1.8782150 0.8671504
-2.0677173 -1.8889862 0.8742188
-2.0756772 -1.9334116 0.9071281
-2.0631032 -1.8060140 0.8241575
-2.0631679 -1.8151069 0.8289756
-2.0632262 -1.8303441 0.8374898
-2.0671961 -1.8836959 0.8704329
-2.0645962 -1.8511279 0.8498315
-2.0727953 -1.9186047 0.8950401
-2.0691164 -1.8968083 0.8792034
-2.0705823 -1.9044277 0.8843866
-2.0654120 -1.8569343 0.8527968
-2.0636696 -1.8114822 0.8261993
-2.0745456 -1.9263895 0.9000531
-2.0667130 -1.8737783 0.8626209
-2.0660597 -1.8637926 0.8564678
-2.0690834 -1.8924833 0.8748595
-2.0771723 -1.9365653 0.9077953
-2.0649206 -1.8418840 0.8423409
-2.0654812 -1.8477518 0.8456456
-2.0741694 -1.9212026 0.8949052
-2.0681581 -1.8813728 0.8665212
-2.0705920 -1.9002556 0.8795706
-2.0686899 -1.8866319 0.8699777
-2.0650450 -1.8377876 0.8391173
-2.0731464 -1.9145972 0.8897750
-2.0671288 -1.8700103 0.8587165
-2.0719728 -1.9071435 0.8841412
-2.0667146 -1.8605359 0.8529790
-2.0648476 -1.8273246 0.8326943
-2.0663223 -1.8541773 0.8488989
-2.0649544 -1.8105049 0.8235280
-2.0784658 -1.9390545 0.9080222
-2.0652086 -1.8340852 0.8363717
-2.0650184 -1.8189149 0.8277787
-2.0703832 -1.8951000 0.8746996
-2.0682170 -1.8766791 0.8621942
-2.0654623 -1.8151426 0.8251385
-2.0654754 -1.8242446 0.8299259
-2.0676915 -1.8668026 0.8555592
-2.0766963 -1.9309296 0.9004263
-2.0719195 -1.9030062 0.8796037
-2.0743804 -1.9172272 0.8899122
-2.0755482 -1.9245454 0.8953804
-2.0701528 -1.8903114 0.8704594
-2.0665269 -1.8450231 0.8417383
-2.0733707 -1.9105680 0.8848323
-2.0698229 -1.8851972 0.8665137
-2.0672037 -1.8515551 0.8452548
-2.0694420 -1.8794684 0.8622064
-2.0688780 -1.8740842 0.8584967
-2.0682627 -1.8636896 0.8523074
-2.0718420 -1.8979162 0.8743559
-2.0664794 -1.8317487 0.8325884
-2.0669279 -1.8418275 0.8385409
-2.0664088 -1.8070622 0.8191543
-2.0680814 -1.8575125 0.8481227
-2.0783460 -1.9346255 0.9008333
-2.0757538 -1.9198296 0.8897733
-2.0733848 -1.9057230 0.8793552
-2.0769422 -1.9272164 0.8951789
-2.0747318 -1.9132359 0.8846323
-2.0717137 -1.8932592 0.8699941
-2.0672201 -1.8375909 0.8350684
-2.0679546 -1.8479897 0.8412348
-2.0670094 -1.8141468 0.8220862
-2.0670708 -1.8233851 0.8267546
-2.0670274 -1.8190137 0.8245235
-2.0706754 -1.8820953 0.8620245
-2.0672278 -1.8283143 0.8292466
-2.0686951 -1.8547966 0.8449212
-2.0713983 -1.8882005 0.8659977
-2.0704524 -1.8771241 0.8579429
-2.0796904 -1.9372202 0.9007078
-2.0771242 -1.9231369 0.8902804
-2.0734401 -1.9013407 0.8744292
-2.0783475 -1.9298935 0.8949718
-2.0747825 -1.9084704 0.8790792
-2.0701173 -1.8672166 0.8513569
-2.0761145 -1.9158950 0.8844402
-2.0687293 -1.8452299 0.8377108
-2.0698433 -1.8616299 0.8478611
-2.0683636 -1.8350352 0.8314127
-2.0732214 -1.8961472 0.8695996
-2.0682657 -1.8115353 0.8185447
-2.0683097 -1.8065379 0.8157126
-2.0695600 -1.8519258 0.8410873
-2.0689663 -1.8417881 0.8347260
-2.0783397 -1.9258135 0.8903661
-2.0729175 -1.8911350 0.8655445
-2.0723336 -1.8859351 0.8620018
-2.0748362 -1.9041788 0.8743869
-2.0809985 -1.9397546 0.9006421
-2.0687887 -1.8186610 0.8214131
-2.0797505 -1.9327360 0.8948913
-2.0688722 -1.8316928 0.8283626
-2.0773793 -1.9185950 0.8845121
-2.0718528 -1.8799548 0.8575790
-2.0704692 -1.8579654 0.8438800
-2.0762210 -1.9119084 0.8794596
-2.0690337 -1.8229879 0.8232002
-2.0692269 -1.8274246 0.8253878
-2.0697662 -1.8390862 0.8315635
-2.0747211 -1.8997328 0.8698265
-2.0703597 -1.8492213 0.8375098
-2.0822846 -1.9422373 0.9008722
-2.0796737 -1.9284058 0.8902380
-2.0743432 -1.8941451 0.8653648
-2.0810716 -1.9360083 0.8954431
-2.0762861 -1.9069681 0.8740706
-2.0788778 -1.9219150 0.8850037
-2.0700898 -1.8152031 0.8174846
-2.0719847 -1.8654803 0.8466328
-2.0721726 -1.8708468 0.8499453
-2.0740022 -1.8890986 0.8613595
-2.0700956 -1.8070466 0.8129904
-2.0732123 -1.8828054 0.8571973
-2.0701759 -1.8110088 0.8151071
-2.0776585 -1.9145985 0.8792381
-2.0707855 -1.8452043 0.8338431
-2.0706375 -1.8351556 0.8274822
-2.0718375 -1.8560037 0.8396886
-2.0732170 -1.8781678 0.8531892
-2.0835808 -1.9446958 0.9008760
-2.0721977 -1.8621667 0.8435315
-2.0762204 -1.9025807 0.8694554
-2.0822747 -1.9385897 0.8956043
-2.0810146 -1.9309946 0.8901135
-2.0718710 -1.8523370 0.8369153
-2.0710121 -1.8318478 0.8248080
-2.0710057 -1.8276822 0.8224707
-2.0802235 -1.9245700 0.8848165
-2.0790173 -1.9173148 0.8792919
-2.0776965 -1.9097495 0.8737623
-2.0746677 -1.8865814 0.8575920
-2.0759861 -1.8977710 0.8652268
-2.0756049 -1.8921582 0.8608095
-2.0835242 -1.9409815 0.8956688
-2.0776410 -1.9054465 0.8693896
-2.0725188 -1.8493204 0.8335794
-2.0719535 -1.8147191 0.8139905
-2.0723392 -1.8393639 0.8271125
-2.0721264 -1.8107403 0.8114898
-2.0815042 -1.9271944 0.8846591
-2.0805252 -1.9206891 0.8797326
-2.0736080 -1.8603273 0.8392251
-2.0749227 -1.8813087 0.8521935
-2.0829511 -1.9348683 0.8900837
-2.0791691 -1.9132009 0.8741285
-2.0740948 -1.8659128 0.8423674
-2.0775457 -1.9007628 0.8647383
-2.0847836 -1.9433299 0.8957822
-2.0771522 -1.8958451 0.8609336
-2.0728569 -1.8352046 0.8235503
-2.0727490 -1.8072916 0.8085609
-2.0765071 -1.8896992 0.8566427
-2.0731621 -1.8314981 0.8208820
-2.0841076 -1.9372847 0.8901268
-2.0791623 -1.9082231 0.8687752
-2.0828413 -1.9297307 0.8845839
-2.0804780 -1.9159739 0.8741339
-2.0738760 -1.8466103 0.8288586
-2.0860147 -1.9455554 0.8960052
-2.0819818 -1.9233061 0.8792886
-2.0742922 -1.8525754 0.8324942
-2.0791251 -1.9037084 0.8642773
-2.0738609 -1.8191321 0.8129914
-2.0740839 -1.8431918 0.8258535
-2.0758724 -1.8738372 0.8443621
-2.0841421 -1.9330452 0.8853774
-2.0853652 -1.9397965 0.8900794
-2.0743844 -1.8393225 0.8232980
-2.0787336 -1.8987271 0.8602038
-2.0806415 -1.9117343 0.8690828
-2.0819422 -1.9186775 0.8738964
-2.0782996 -1.8929673 0.8559049
-2.0745724 -1.8244221 0.8145147
-2.0760886 -1.8704105 0.8413812
-2.0832606 -1.9260532 0.8793080
-2.0805665 -1.9073234 0.8648074
-2.0853781 -1.9356943 0.8854927
-2.0750630 -1.8359513 0.8203074
-2.0865358 -1.9423099 0.8903069
-2.0760391 -1.8609056 0.8344791
-2.0783413 -1.8886054 0.8516152
-2.0802059 -1.9017768 0.8599841
-2.0820632 -1.9145213 0.8687715
-2.0833929 -1.9213653 0.8736751
-2.0846637 -1.9286737 0.8791526
-2.0776109 -1.8774169 0.8433347
-2.0780738 -1.8834474 0.8473504
-2.0763134 -1.8514347 0.8275946
-2.0799914 -1.8968558 0.8558633
-2.0877633 -1.9446550 0.8904173
-2.0819841 -1.9101659 0.8644397
-2.0869870 -1.9384455 0.8849235
-2.0798209 -1.8915198 0.8511793
-2.0833930 -1.9173049 0.8687689
-2.0859716 -1.9312671 0.8790262
-2.0890687 -1.9475646 0.8913269
-2.0777000 -1.8645180 0.8334155
-2.0818775 -1.9054992 0.8600852
-2.0769001 -1.8292649 0.8131836
-2.0900365 -1.9498079 0.8920619
-2.0815600 -1.8998750 0.8553316
-2.0882568 -1.9411123 0.8850090
-2.0834165 -1.9129889 0.8640915
-2.0775312 -1.8081514 0.8006835
-2.0872502 -1.9345494 0.8798476
-2.0849493 -1.9207082 0.8691804
-2.0861956 -1.9274008 0.8739294
-2.0814165 -1.8951136 0.8510580
-2.0778466 -1.8122089 0.8022887
-2.0778683 -1.8173833 0.8049568
-2.0777527 -1.8279843 0.8107206
-2.0781449 -1.8514842 0.8236701
-2.0792423 -1.8722656 0.8359359
-2.0795137 -1.8776030 0.8392998
-2.0801313 -1.8840212 0.8433414
-2.0833509 -1.9084371 0.8596418
-2.0884877 -1.9370451 0.8798149
-2.0830321 -1.9028097 0.8548766
-2.0848515 -1.9157746 0.8637798
-2.0863519 -1.9234462 0.8689157
-2.0876011 -1.9300418 0.8737557
-2.0796485 -1.8631869 0.8283006
-2.0798906 -1.8685296 0.8316425
-2.0821482 -1.8926382 0.8472515
-2.0828883 -1.8982277 0.8507855
-2.0909105 -1.9468208 0.8858480
-2.0896623 -1.9396110 0.8800047
-2.0847811 -1.9113190 0.8592376
-2.0807980 -1.8755465 0.8351792
-2.0819981 -1.8873772 0.8425311
-2.0813365 -1.8818198 0.8389512
-2.0862407 -1.9192726 0.8644071
-2.0795151 -1.8126545 0.7995987
-2.0844506 -1.9065209 0.8553210
-2.0796137 -1.8318747 0.8094353
-2.0797390 -1.8169712 0.8014658
-2.0888763 -1.9327059 0.8738474
-2.0876888 -1.9261361 0.8686987
-2.0921290 -1.9491859 0.8859387
-2.0802878 -1.8561643 0.8225124
-2.0800945 -1.8083241 0.7963022
-2.0799720 -1.8221368 0.8036547
-2.0838049 -1.8958721 0.8465394
-2.0910402 -1.9422555 0.8798267
-2.0861723 -1.9141083 0.8589221
-2.0813768 -1.8667719 0.8272743
-2.0876682 -1.9220215 0.8641287
-2.0889085 -1.9287704 0.8688215
-2.0902786 -1.9359942 0.8743782
-2.0830558 -1.8851583 0.8385100
-2.0824285 -1.8788104 0.8344115
-2.0932946 -1.9514478 0.8861417
-2.0860326 -1.9094644 0.8545394
-2.0817481 -1.8632913 0.8243597
-2.0823478 -1.8736593 0.8305212
-2.0839879 -1.8913298 0.8420730
-2.0875603 -1.9175858 0.8595731
-2.0924867 -1.9455779 0.8803309
-2.0815962 -1.8209356 0.8001124
-2.0820336 -1.8599207 0.8213635
-2.0816657 -1.8166184 0.7978507
-2.0815585 -1.8363479 0.8083970
-2.0914906 -1.9384861 0.8743501
-2.0817180 -1.8127270 0.7956981
-2.0890899 -1.9247489 0.8638725
-2.0855169 -1.8990294 0.8458833
-2.0902789 -1.9313706 0.8686872
-2.0839705 -1.8826303 0.8344153
-2.0874216 -1.9124650 0.8543544
-2.0835635 -1.8763696 0.8302425
-2.0937711 -1.9481878 0.8804598
-2.0847475 -1.8880797 0.8377238
-2.0925824 -1.9409534 0.8746303
-2.0889621 -1.9203610 0.8592707
-2.0833880 -1.8675259 0.8239628
-2.0837604 -1.8729594 0.8272355
-2.0905301 -1.9281259 0.8643161
-2.0916982 -1.9346541 0.8692217
-2.0871593 -1.9028326 0.8459198
-2.0951690 -1.9507220 0.8803839
-2.0888386 -1.9152827 0.8540095
-2.0838528 -1.8635174 0.8203443
-2.0832864 -1.8254058 0.7993805
-2.0849090 -1.8799807 0.8303913
-2.0938111 -1.9434405 0.8746065
-2.0834984 -1.8165379 0.7944812
-2.0834261 -1.8212425 0.7970583
-2.0855895 -1.8855238 0.8336449
-2.0864186 -1.8919104 0.8377340
-2.0904082 -1.9231418 0.8589639
-2.0929471 -1.9372744 0.8693530
-2.0838270 -1.8310061 0.8013559
-2.0839164 -1.8545937 0.8141325
-2.0918826 -1.9307315 0.8641766
-2.0964362 -1.9531092 0.8804534
-2.0949791 -1.9459951 0.8748000
-2.0851882 -1.8708987 0.8231589
-2.0886153 -1.9060578 0.8455483
-2.0842807 -1.8464306 0.8085483
-2.0902152 -1.9179998 0.8537606
-2.0863292 -1.8830935 0.8301601
-2.0860004 -1.8776049 0.8265637
-2.0942678 -1.9398311 0.8692608
-2.0975194 -1.9553718 0.8809064
-2.0872164 -1.8888124 0.8332463
-2.0918410 -1.9259414 0.8586407
-2.0855365 -1.8676586 0.8199989
-2.0931800 -1.9332818 0.8640912
-2.0885468 -1.9009438 0.8412460
-2.0851077 -1.8250020 0.7959413
-2.0881883 -1.8949636 0.8368314
-2.0964726 -1.9493318 0.8752854
-2.0985843 -1.9582708 0.8820875
-2.0953900 -1.9423289 0.8695106
-2.0854270 -1.8210216 0.7934042
-2.0855069 -1.8542941 0.8109148
-2.0905961 -1.9140498 0.8487534
-2.0916351 -1.9214197 0.8541536
-2.0858838 -1.8583311 0.8130051
-2.0861268 -1.8634979 0.8160990
-2.0932758 -1.9293968 0.8592993
-2.0944056 -1.9358532 0.8642709
-2.0870092 -1.8743439 0.8222857
-2.0857451 -1.8347901 0.7997324
-2.0861429 -1.8078885 0.7856020
-2.0903509 -1.9091280 0.8446348
-2.0898544 -1.9039172 0.8411137
-2.0880591 -1.8861240 0.8292636
-2.0965891 -1.9453115 0.8703340
-2.0872749 -1.8709276 0.8192899
-2.0979558 -1.9519739 0.8751070
-2.0889547 -1.8925915 0.8329269
-2.0955997 -1.9384114 0.8644621
-2.0880877 -1.8811499 0.8252356
-2.0866397 -1.8136865 0.7872808
-2.0898030 -1.8981121 0.8362048
-2.0864871 -1.8504726 0.8067400
-2.0921146 -1.9175287 0.8490815
-2.0930660 -1.9241695 0.8538776
-2.0946696 -1.9320746 0.8590897
-2.0877960 -1.8678116 0.8160322
-2.0977225 -1.9477623 0.8703522
-2.0912938 -1.9068712 0.8406338
-2.0897241 -1.8899766 0.8292543
-2.0994031 -1.9545680 0.8749747
-2.0878916 -1.8618352 0.8116991
-2.0970007 -1.9416562 0.8650330
-2.0888561 -1.8783127 0.8217423
-2.0879248 -1.8070583 0.7824235
-2.0904064 -1.8954640 0.8325537
-2.0877859 -1.8581091 0.8093505
-2.0934204 -1.9203650 0.8490418
-2.0943926 -1.9269903 0.8538409
-2.0876851 -1.8307558 0.7942856
-2.0875993 -1.8347168 0.7963574
-2.0876120 -1.8386497 0.7984852
-2.0913208 -1.9019876 0.8365144
-2.0889529 -1.8742110 0.8185579
-2.0960101 -1.9346241 0.8590019
-2.0990137 -1.9503536 0.8705049
-2.0932540 -1.9157149 0.8446802
-2.0882970 -1.8132439 0.7841626
-2.0882749 -1.8548496 0.8062754
-2.0883903 -1.8173172 0.7862441
-2.1006259 -1.9569811 0.8750248
-2.0983098 -1.9441706 0.8649801
-2.0928905 -1.9099407 0.8400538
-2.0901958 -1.8811720 0.8213772
-2.0971793 -1.9371461 0.8592299
-2.0895682 -1.8711256 0.8152385
-2.0948384 -1.9231109 0.8487657
-2.0887125 -1.8504904 0.8029021
-2.0960311 -1.9305299 0.8541241
-2.1016890 -1.9598672 0.8762237
-2.0926461 -1.9047696 0.8361634
-2.0895501 -1.8658521 0.8115152
-2.0913695 -1.8932098 0.8285249
-2.0919986 -1.8985193 0.8319881
-2.1006052 -1.9531254 0.8701978
-2.0994230 -1.9466289 0.8652669
-2.0914188 -1.8885070 0.8245995
-2.0906560 -1.8782748 0.8182915
-2.0947279 -1.9185009 0.8443647
-2.0898061 -1.8616163 0.8080429
-2.0899085 -1.8578849 0.8053101
-2.0986077 -1.9402629 0.8596378
-2.0944338 -1.9136414 0.8401836
-2.0962142 -1.9258283 0.8485157
-2.0898426 -1.8387277 0.7945867
-2.0939774 -1.9077764 0.8360017
-2.0901506 -1.8123004 0.7807132
-2.0918822 -1.8846439 0.8208013
-2.0976175 -1.9334139 0.8537195
-2.0911930 -1.8743368 0.8145682
-2.1005080 -1.9489364 0.8654159
-2.0935401 -1.9023909 0.8322763
-2.0901989 -1.8545059 0.8026816
-2.0909146 -1.8687809 0.8110367
-2.1020361 -1.9558076 0.8699832
-2.0903309 -1.8350816 0.7918293
-2.0904968 -1.8172067 0.7824275
-2.0904809 -1.8311846 0.7897080
-2.0961438 -1.9212924 0.8440430
-2.0997681 -1.9427665 0.8598820
-2.0975721 -1.9291509 0.8489974
-2.0910360 -1.8505152 0.7990797
-2.0933927 -1.8935041 0.8247885
-2.0923650 -1.8813974 0.8172786
-2.0940148 -1.8995822 0.8287721
-2.0915464 -1.8657163 0.8077432
-2.0920047 -1.8715432 0.8110844
-2.0990540 -1.9361788 0.8537169
-2.0959745 -1.9165796 0.8397277
-2.0915816 -1.8614995 0.8046746
-2.1034787 -1.9590720 0.8705438
-2.0926633 -1.8781916 0.8145208
-2.0956145 -1.9107339 0.8351840
-2.0950765 -1.9054217 0.8317291
-2.1010229 -1.9452542 0.8598554
-2.0934642 -1.8878972 0.8200357
-2.0975587 -1.9247135 0.8444272
-2.0918296 -1.8577630 0.8019229
-2.0917144 -1.8432867 0.7938923
-2.0988593 -1.9317056 0.8489039
-2.0926652 -1.8073002 0.7746269
-2.1046436 -1.9614985 0.8708447
-2.1003958 -1.9387476 0.8536095
-2.0923562 -1.8167012 0.7790207
-2.0929449 -1.8689584 0.8074141
-2.0923152 -1.8216919 0.7813823
-2.0974486 -1.9194010 0.8393809
-2.1022493 -1.9478100 0.8600484
-2.0939667 -1.8846291 0.8165867
-2.0934971 -1.8753365 0.8110532
-2.0924429 -1.8349725 0.7880916
-2.0971240 -1.9145472 0.8355436
-2.0926861 -1.8403621 0.7905954
-2.1000481 -1.9342709 0.8490991
-2.0966041 -1.9084597 0.8312029
-2.0989388 -1.9273943 0.8442138
-2.0941443 -1.8812862 0.8138991
-2.0956226 -1.8971522 0.8233479
-2.1016195 -1.9411668 0.8536461
-2.0952320 -1.8920659 0.8197202
-2.0935419 -1.8138328 0.7757466
-2.0934209 -1.8556807 0.7979439
-2.0936455 -1.8657185 0.8038985
-2.0934946 -1.8611500 0.8010947
-2.1049165 -1.9578281 0.8655675
-2.1035934 -1.9503505 0.8599693
-2.0988772 -1.9229117 0.8396919
-2.0953225 -1.8885706 0.8168342
-2.1067440 -1.9659953 0.8715402
-2.1011890 -1.9366235 0.8491973
-2.0970759 -1.9056326 0.8277158
-2.0945327 -1.8719345 0.8065208
-2.0949358 -1.8784473 0.8104548
-2.1027024 -1.9440580 0.8545543
-2.1003553 -1.9303181 0.8440899
-2.0987875 -1.9174247 0.8348136
-2.1047441 -1.9535096 0.8609102
-2.0981850 -1.9122357 0.8312605
-2.0941165 -1.8432992 0.7896437
-2.0947000 -1.8125285 0.7733657
-2.0943412 -1.8396427 0.7872905
-2.1062111 -1.9603842 0.8654777
-2.0944522 -1.8214419 0.7777170
-2.1023672 -1.9395862 0.8500354
-2.0968965 -1.8953489 0.8189674
-2.1038627 -1.9463654 0.8546986
-2.1003439 -1.9257210 0.8393580
-2.0953043 -1.8656139 0.8009088
-2.0948732 -1.8352532 0.7840386
-2.0978089 -1.9016496 0.8227773
-2.0958743 -1.8756249 0.8066132
-2.1017501 -1.9330154 0.8438584
-2.0987368 -1.9088041 0.8270450
-2.1074953 -1.9627578 0.8655573
-2.1002929 -1.9203480 0.8343714
-2.1037372 -1.9423171 0.8500651
-2.1050266 -1.9488561 0.8549548
-2.0958010 -1.8187833 0.7743449
-2.0999182 -1.9153831 0.8306152
-2.1017097 -1.9286075 0.8392793
-2.0963971 -1.8117355 0.7701195
-2.0959646 -1.8431623 0.7863288
-2.0959038 -1.8478477 0.7889470
-2.1030265 -1.9355857 0.8437489
-2.1086597 -1.9651624 0.8658762
-2.1061900 -1.9514774 0.8550902
-2.0978292 -1.8839567 0.8086342
-2.1018086 -1.9241641 0.8347201
-2.0966379 -1.8397803 0.7833486
-2.1006265 -1.9129039 0.8268133
-2.1052776 -1.9449846 0.8495777
-2.1042283 -1.9387995 0.8446382
-2.0993410 -1.9013985 0.8191243
-2.0972149 -1.8169988 0.7712009
-2.1100157 -1.9682164 0.8666397
-2.1015033 -1.9184782 0.8300318
-2.0972304 -1.8596347 0.7934947
-2.0975412 -1.8693759 0.7989770
-2.1033229 -1.9315883 0.8387829
-2.0990448 -1.8962694 0.8151748
-2.1029361 -1.9265934 0.8347342
-2.0977571 -1.8229520 0.7728178
-2.1077690 -1.9548962 0.8552135
-2.1054010 -1.9411746 0.8447155
-2.1045780 -1.9341723 0.8386571
-2.0988801 -1.8077883 0.7642755
-2.0982214 -1.8523262 0.7872406
-2.0989821 -1.8771628 0.8014570
-2.1009351 -1.9045614 0.8184805
-2.1096082 -1.9621420 0.8594302
-2.1022714 -1.9161905 0.8260510
-2.1030292 -1.9214946 0.8294990
-2.0998366 -1.8878238 0.8074140
-2.1104821 -1.9648223 0.8608306
-2.1065648 -1.9436226 0.8447275
-2.1043939 -1.9294908 0.8343159
-2.0989673 -1.8632226 0.7924825
-2.1004542 -1.8937090 0.8102640
-2.1008593 -1.8997532 0.8142473
-2.1092425 -1.9578833 0.8549947
-2.0993381 -1.8219358 0.7696935
-2.1115440 -1.9671226 0.8612554
-2.1059874 -1.9376252 0.8390188
-2.0998609 -1.8745627 0.7977920
-2.1086456 -1.9517734 0.8493995
-2.0996195 -1.8275472 0.7720810
-2.1006727 -1.8806481 0.8005247
-2.1009434 -1.8868446 0.8043098
-2.1050963 -1.9270192 0.8305067
-2.1081980 -1.9467756 0.8443554
-2.1126315 -1.9694521 0.8616474
-2.1041049 -1.9193828 0.8250295
-2.1059400 -1.9324636 0.8338286
-2.1072802 -1.9402292 0.8388809
-2.1006611 -1.8209945 0.7670665
-2.1004381 -1.8575654 0.7860024
-2.1018798 -1.8915031 0.8059010
-2.1027635 -1.9032635 0.8132980
-2.1099870 -1.9544493 0.8491961
-2.1113140 -1.9612662 0.8540930
-2.1024003 -1.8978706 0.8096046
-2.1014529 -1.8778954 0.7969951
-2.1015152 -1.8134453 0.7622592
-2.1047677 -1.9167775 0.8213454
-2.1139336 -1.9718046 0.8615090
-2.1074144 -1.9360439 0.8340774
-2.1066613 -1.9301578 0.8298779
-2.1015449 -1.8315489 0.7707153
-2.1022977 -1.8840417 0.7996730
-2.1058150 -1.9232465 0.8250124
-2.1015537 -1.8267600 0.7684117
-2.1100698 -1.9505027 0.8441776
-2.1014199 -1.8406478 0.7749845
-2.1015092 -1.8497391 0.7798067
-2.1048109 -1.9123041 0.8171671
-2.1089258 -1.9433541 0.8385513
-2.1127862 -1.9638981 0.8539198
-2.1029303 -1.8906756 0.8030814
-2.1044174 -1.9072263 0.8131787
-2.1039680 -1.9012499 0.8091251
-2.1027883 -1.8114649 0.7593589
-2.1087934 -1.9390120 0.8339111
-2.1031350 -1.8813277 0.7960721
-2.1101307 -1.9457997 0.8385603
-2.1041952 -1.8979555 0.8060281
-2.1065591 -1.9208635 0.8211204
-2.1145977 -1.9686445 0.8557123
-2.1082407 -1.9332053 0.8293202
-2.1024438 -1.8571717 0.7820134
-2.1116366 -1.9536194 0.8438355
-2.1128498 -1.9601002 0.8487723
-2.1039016 -1.8880574 0.7994444
-2.1064794 -1.9154842 0.8165045
-2.1036450 -1.8219321 0.7625873
-2.1034421 -1.8724374 0.7895084
-2.1053874 -1.9042339 0.8086076
-2.1112813 -1.9489645 0.8394962
-2.1035984 -1.8309627 0.7669551
-2.1061426 -1.9105113 0.8124039
-2.1033622 -1.8542313 0.7787082
-2.1103766 -1.9419755 0.8334321
-2.1043372 -1.8183332 0.7598401
-2.1042318 -1.8786482 0.7921164
-2.1050928 -1.8951097 0.8021748
-2.1128405 -1.9559649 0.8436668
-2.1038264 -1.8361957 0.7690612
-2.1039805 -1.8692492 0.7863677
-2.1047662 -1.8853626 0.7958690
-2.1166104 -1.9729788 0.8565654
-2.1039175 -1.8458544 0.7733963
-2.1065951 -1.9069531 0.8083297
-2.1086130 -1.9244717 0.8200712
-2.1154913 -1.9667800 0.8510891
-2.1061177 -1.9013829 0.8047951
-2.1042429 -1.8613420 0.7809464
-2.1055758 -1.8914466 0.7986033
-2.1080942 -1.9186333 0.8158516
-2.1116813 -1.9446179 0.8332536
-2.1050520 -1.8757934 0.7886947
-2.1063960 -1.8982554 0.8019102
-2.1078771 -1.9137156 0.8117266
-2.1133301 -1.9535418 0.8398277
-2.1150502 -1.9606746 0.8444259
-2.1113050 -1.9398110 0.8290324
-2.1057636 -1.8826498 0.7919298
-2.1169194 -1.9694524 0.8511469
-2.1099469 -1.9273921 0.8199781
-2.1128304 -1.9477043 0.8342613
-2.1064060 -1.8886746 0.7951010
-2.1060645 -1.8174682 0.7566805
-2.1058242 -1.8266572 0.7613184
-2.1052051 -1.8581315 0.7774139
-2.1079179 -1.9104835 0.8085732
-2.1055893 -1.8355605 0.7657590
-2.1058002 -1.8728106 0.7853408
-2.1077856 -1.9056069 0.8047967
-2.1062167 -1.8227763 0.7587665
-2.1072444 -1.8955174 0.7983729
-2.1097356 -1.9222851 0.8156740
-2.1060226 -1.8407233 0.7673183
-2.1060051 -1.8446615 0.7694265
-2.1058365 -1.8538266 0.7741022
-2.1064734 -1.8799256 0.7887673
-2.1091424 -1.9164145 0.8114814
-2.1146996 -1.9562043 0.8396381
-2.1116869 -1.9359561 0.8242563
-2.1164747 -1.9639572 0.8449685
-2.1127175 -1.9425508 0.8287643
-2.1140891 -1.9502903 0.8341405
-2.1063130 -1.8651819 0.7793065
-2.1184751 -1.9721455 0.8509164
-2.1081856 -1.9016479 0.8010400
-2.1113214 -1.9302029 0.8196334
-2.1065099 -1.8699100 0.7819463
-2.1074061 -1.8859759 0.7911063
-2.1094630 -1.9134666 0.8080773
-2.1080403 -1.8919354 0.7943381
-2.1111147 -1.9252456 0.8155460
-2.1103676 -1.9197898 0.8118813
-2.1073022 -1.8350842 0.7627704
-2.1128199 -1.9384310 0.8242245
-2.1178013 -1.9664566 0.8449315
-2.1138842 -1.9452430 0.8288483
-2.1075543 -1.8763272 0.7843942
-2.1153119 -1.9529240 0.8342677
-2.1088929 -1.8987897 0.7976422
-2.1096936 -1.9090568 0.8038777
-2.1200264 -1.9749133 0.8508581
-2.1073554 -1.8488392 0.7689707
-2.1080237 -1.8265986 0.7575515
-2.1126750 -1.9336704 0.8199568
-2.1077247 -1.8398990 0.7641065
-2.1076198 -1.8584003 0.7733682
-2.1081219 -1.8732711 0.7811299
-2.1099471 -1.9057629 0.8007804
-2.1078864 -1.8544994 0.7708115
-2.1191284 -1.9689037 0.8449281
-2.1116367 -1.9224818 0.8116464
-2.1124885 -1.9280903 0.8151703
-2.1087618 -1.8231085 0.7547021
-2.1080999 -1.8696124 0.7787265
-2.1110984 -1.9165886 0.8074764
-2.1090204 -1.8893049 0.7903181
-2.1152588 -1.9485279 0.8293716
-2.1165791 -1.9553840 0.8342630
-2.1095590 -1.8958132 0.7942743
-2.1179766 -1.9627436 0.8396928
-2.1083616 -1.8658935 0.7760017
-2.1097463 -1.8116051 0.7484798
-2.1140215 -1.9364295 0.8196636
-2.1104713 -1.9019704 0.7969507
-2.1088848 -1.8526046 0.7682102
-2.1094280 -1.8804644 0.7837146
-2.1093456 -1.8391963 0.7612427
-2.1191315 -1.9650747 0.8398200
-2.1130461 -1.9254702 0.8114768
-2.1209131 -1.9729405 0.8460855
-2.1139249 -1.9316526 0.8154072
-2.1166442 -1.9513004 0.8290748
-2.1100010 -1.8305142 0.7562938
-2.1094879 -1.8583173 0.7700050
-2.1098119 -1.8774311 0.7807592
-2.1118120 -1.9092460 0.7998661
-2.1105883 -1.8933131 0.7901340
-2.1111418 -1.8991111 0.7935105
-2.1102169 -1.8359108 0.7583070
-2.1099423 -1.8451087 0.7629246
-2.1096391 -1.8621893 0.7717689
-2.1161487 -1.9445504 0.8230953
-2.1104281 -1.8267526 0.7536284
-2.1201981 -1.9675091 0.8401259
-2.1155125 -1.9392911 0.8192946
-2.1150665 -1.9343735 0.8154748
-2.1224055 -1.9764768 0.8466573
-2.1180829 -1.9541627 0.8289947
-2.1115636 -1.8159715 0.7473422
-2.1122635 -1.9051519 0.7959002
-2.1118370 -1.8116405 0.7452112
-2.1104199 -1.8698840 0.7746552
-2.1147429 -1.9286643 0.8108040
-2.1174028 -1.9477718 0.8236648
-2.1106280 -1.8572364 0.7674040
-2.1213976 -1.9698753 0.8402175
-2.1114675 -1.8843730 0.7824277
-2.1161125 -1.9368060 0.8154784
-2.1171140 -1.9429409 0.8194629
-2.1128878 -1.9022840 0.7924581
-2.1116519 -1.8808411 0.7795191
-2.1137444 -1.9126654 0.7986421
-2.1128884 -1.8100864 0.7429357
-2.1113326 -1.8618612 0.7686084
-2.1113903 -1.8670173 0.7712906
-2.1122264 -1.8913385 0.7855655
-2.1143958 -1.9191112 0.8026530
-2.1226319 -1.9729191 0.8412597
-2.1239870 -1.9793370 0.8462573
-2.1194891 -1.9567902 0.8288313
-2.1119788 -1.8311424 0.7530070
-2.1185587 -1.9503613 0.8238391
-2.1164068 -1.9324280 0.8108785
-2.1139487 -1.9092436 0.7956557
-2.1123143 -1.8411932 0.7570115
-2.1213927 -1.9647657 0.8336683
-2.1184668 -1.9458711 0.8193403
-2.1175623 -1.9396008 0.8151582
-2.1124697 -1.8742765 0.7737388
-2.1209654 -1.9603322 0.8294100
-2.1143181 -1.9062533 0.7926870
-2.1135141 -1.8206290 0.7460340
-2.1132163 -1.8886984 0.7819552
-2.1198340 -1.9529196 0.8237404
-2.1139230 -1.8160158 0.7435271
-2.1225705 -1.9672886 0.8336121
-2.1161231 -1.9221742 0.8017353
-2.1132390 -1.8704394 0.7700254
-2.1157388 -1.9169076 0.7979133
-2.1130573 -1.8613709 0.7650984
-2.1144021 -1.8953159 0.7842643
-2.1180409 -1.9353519 0.8101070
-2.1211282 -1.9554509 0.8236672
-2.1199921 -1.9486328 0.8187356
-2.1192379 -1.9434205 0.8151850
-2.1151016 -1.8146389 0.7412130
-2.1158326 -1.9128402 0.7946354
-2.1237943 -1.9698325 0.8338160
-2.1226311 -1.9631713 0.8287543
-2.1144591 -1.8407268 0.7530686
-2.1142247 -1.8497460 0.7572007
-2.1149487 -1.8922870 0.7809303
-2.1176364 -1.9260826 0.8020077
-2.1185069 -1.9327424 0.8067519
-2.1145250 -1.8782612 0.7724425
-2.1194084 -1.9382766 0.8100062
-2.1224292 -1.9586352 0.8242874
-2.1211761 -1.9511246 0.8186982
-2.1158484 -1.8206562 0.7422231
-2.1153904 -1.8324174 0.7478175
-2.1166867 -1.9102318 0.7909708
-2.1174881 -1.9205169 0.7972287
-2.1252177 -1.9730519 0.8344088
-2.1149157 -1.8739945 0.7689729
-2.1208916 -1.9465323 0.8145823
-2.1162714 -1.8997505 0.7837013
-2.1176541 -1.9170779 0.7942643
-2.1168593 -1.8137495 0.7380621
-2.1160748 -1.8950223 0.7806062
-2.1223289 -1.9536879 0.8189023
-2.1238362 -1.9613389 0.8240547
-2.1203167 -1.9360730 0.8059534
-2.1186219 -1.9231627 0.7970121
-2.1193179 -1.9291015 0.8011392
-2.1264846 -1.9756180 0.8343112
-2.1156657 -1.8666800 0.7634392
-2.1212297 -1.9422348 0.8098879
-2.1182970 -1.9141913 0.7908449
-2.1236609 -1.9570253 0.8196770
-2.1224387 -1.9494199 0.8141765
-2.1166146 -1.8452816 0.7512851
-2.1162633 -1.8636192 0.7606340
-2.1163924 -1.8714510 0.7649484
-2.1170038 -1.8924054 0.7769646
-2.1257724 -1.9688660 0.8280123
-2.1166056 -1.8783609 0.7684397
-2.1169526 -1.8832047 0.7710540
-2.1194199 -1.9205149 0.7933807
-2.1180338 -1.9030391 0.7825390
-2.1278386 -1.9782630 0.8341364
-2.1253600 -1.9641531 0.8237169
-2.1178464 -1.8993884 0.7801425
-2.1182041 -1.8206816 0.7384248
-2.1208486 -1.9322265 0.8008594
-2.1293913 -1.9858679 0.8395909
-2.1201391 -1.9268981 0.7970729
-2.1228587 -1.9453459 0.8092840
-2.1236918 -1.9520299 0.8140288
-2.1250429 -1.9596846 0.8194845
-2.1271018 -1.9720635 0.8286256
-2.1221494 -1.9392712 0.8049320
-2.1172719 -1.8558085 0.7543941
-2.1175412 -1.8754766 0.7650785
-2.1199562 -1.9174315 0.7901066
-2.1176571 -1.8602923 0.7561196
-2.1291619 -1.9810052 0.8341471
-2.1194559 -1.8194135 0.7360228
-2.1188133 -1.8312243 0.7415106
-2.1187508 -1.8967306 0.7764932
-2.1195053 -1.9063020 0.7821798
-2.1246970 -1.9545289 0.8142944
-2.1281605 -1.9745663 0.8288770
-2.1183701 -1.8819471 0.7674330
-2.1270275 -1.9671574 0.8231989
-2.1183675 -1.8673814 0.7590828
-2.1217527 -1.9299739 0.7965163
-2.1264559 -1.9624074 0.8192328
-2.1212581 -1.9237140 0.7923625
-2.1196040 -1.9029193 0.7791349
-2.1191900 -1.8368316 0.7433555
-2.1191098 -1.8413371 0.7454433
-2.1243619 -1.9483153 0.8087977
-2.1190717 -1.8872564 0.7696457
-2.1237131 -1.9429316 0.8051019
-2.1258898 -1.9577886 0.8151445
-2.1292080 -1.9768742 0.8290245
-2.1306162 -1.9837809 0.8338369
-2.1216515 -1.9207427 0.7893406
-2.1203681 -1.8252480 0.7366589
-2.1189236 -1.8549644 0.7512055
-2.1188612 -1.8594496 0.7532963
-2.1197905 -1.8933353 0.7723628
-2.1211575 -1.9150332 0.7858955
-2.1191881 -1.8786644 0.7639549
-2.1192190 -1.8645035 0.7557010
-2.1257281 -1.9519637 0.8092883
-2.1248932 -1.9457682 0.8050598
-2.1303348 -1.9793435 0.8293023
-2.1206226 -1.8308789 0.7384237
-2.1279529 -1.9652159 0.8189006
-2.1227649 -1.9276970 0.7925435
-2.1320413 -1.9868593 0.8345662
-2.1234441 -1.9331729 0.7958213
-2.1272631 -1.9604539 0.8149475
-2.1202523 -1.8862726 0.7665561
-2.1201970 -1.8719471 0.7583779
-2.1214075 -1.9064345 0.7781502
-2.1226073 -1.9182171 0.7856099
-2.1210057 -1.8908695 0.7682142
-2.1315603 -1.9817423 0.8293649
-2.1261838 -1.9486819 0.8049428
-2.1212230 -1.8411704 0.7416781
-2.1233972 -1.9241153 0.7884824
-2.1206353 -1.8676257 0.7550259
-2.1220556 -1.8243726 0.7334730
-2.1214455 -1.8368801 0.7394949
-2.1270996 -1.9547868 0.8089385
-2.1205499 -1.8638356 0.7527339
-2.1294354 -1.9687175 0.8192269
-2.1336762 -1.9908293 0.8357871
-2.1216024 -1.8975270 0.7716242
-2.1286744 -1.9631965 0.8146793
-2.1232338 -1.8141951 0.7278068
-2.1215047 -1.8509869 0.7454090
-2.1210553 -1.8602370 0.7499283
-2.1214299 -1.8790794 0.7602132
-2.1249953 -1.9371813 0.7956555
-2.1335648 -1.9869053 0.8310164
-2.1242215 -1.9212456 0.7846878
-2.1226790 -1.8361719 0.7371007
-2.1232437 -1.9107748 0.7777166
-2.1317087 -1.9767157 0.8227354
-2.1222244 -1.8901132 0.7653337
-2.1226290 -1.8949888 0.7679221
-2.1250617 -1.9281894 0.7882519
-2.1230925 -1.9009634 0.7711183
-2.1277680 -1.9517062 0.8040932
-2.1224258 -1.8675406 0.7516419
-2.1346439 -1.9892432 0.8311627
-2.1225409 -1.8719328 0.7541512
-2.1332193 -1.9806708 0.8239439
-2.1241244 -1.8296643 0.7321629
-2.1232982 -1.8461583 0.7401791
-2.1267127 -1.9407651 0.7946127
-2.1256350 -1.9251894 0.7849363
-2.1234814 -1.8832606 0.7586636
-2.1236310 -1.8554358 0.7437214
-2.1240032 -1.8980969 0.7672676
-2.1342212 -1.9830376 0.8243219
-2.1241048 -1.8418223 0.7369690
-2.1233880 -1.8647247 0.7482350
-2.1244535 -1.9039634 0.7705697
-2.1303228 -1.9609504 0.8077595
-2.1326061 -1.9747828 0.8181420
-2.1294276 -1.9555963 0.8040583
-2.1242846 -1.8938089 0.7638482
-2.1259457 -1.8191379 0.7253376
-2.1269887 -1.9317358 0.7869067
-2.1242165 -1.8716982 0.7508854
-2.1339355 -1.9775986 0.8180983
-2.1252853 -1.8405742 0.7345339
-2.1246480 -1.8760000 0.7527435
-2.1284488 -1.9443398 0.7935850
-2.1375380 -1.9945705 0.8310001
-2.1316860 -1.9636313 0.8075452
-2.1273047 -1.9283548 0.7838900
-2.1309734 -1.9586287 0.8035197
-2.1256788 -1.9015229 0.7663960
-2.1275762 -1.8132766 0.7210048
-2.1252944 -1.8546934 0.7404190
-2.1250297 -1.8690723 0.7476961
-2.1353674 -1.9807579 0.8187427
-2.1257312 -1.8880332 0.7574568
-2.1260312 -1.8981649 0.7633449
-2.1278874 -1.8181985 0.7222972
-2.1256761 -1.8839354 0.7550060
-2.1292007 -1.9417895 0.7898547
-2.1343578 -1.9738912 0.8128479
-2.1256615 -1.8603069 0.7422582
-2.1331413 -1.9670414 0.8079545
-2.1323367 -1.9614323 0.8034932
-2.1264564 -1.8472197 0.7351333
-2.1292505 -1.9369330 0.7856836
-2.1366161 -1.9832612 0.8186998
-2.1272527 -1.9056536 0.7660864
-2.1354857 -1.9761695 0.8130189
-2.1282863 -1.8248490 0.7231221
-2.1281187 -1.9157394 0.7712935
-2.1296967 -1.9326728 0.7822634
-2.1345745 -1.9697838 0.8076853
-2.1305916 -1.9446696 0.7894390
-2.1274286 -1.8461404 0.7329586
-2.1277276 -1.9016380 0.7624299
-2.1378204 -1.9858271 0.8188926
-2.1339868 -1.9643155 0.8027926
-2.1273837 -1.8596707 0.7388728
-2.1308756 -1.9400510 0.7850969
-2.1276487 -1.8879807 0.7535829
-2.1276817 -1.8645445 0.7407464
-2.1275922 -1.8692763 0.7432894
-2.1359146 -1.9724393 0.8077866
-2.1281653 -1.8922719 0.7554954
-2.1286793 -1.9088388 0.7653660
-2.1305467 -1.9308393 0.7791262
-2.1336085 -1.9585011 0.7972227
-2.1377483 -1.9813778 0.8140494
-2.1320138 -1.9474938 0.7890818
-2.1353398 -1.9676860 0.8035369
-2.1314383 -1.9368758 0.7819158
-2.1303689 -1.8238790 0.7201708
-2.1288127 -1.8520588 0.7331147
-2.1289281 -1.8992327 0.7586303
-2.1392551 -1.9886829 0.8185134
-2.1299618 -1.9201081 0.7707888
-2.1370963 -1.9748389 0.8078420
-2.1349518 -1.9630011 0.7992085
-2.1322106 -1.9428530 0.7847480
-2.1389587 -1.9838841 0.8142985
-2.1302306 -1.9165934 0.7678998
-2.1414909 -1.9973085 0.8240175
-2.1420523 -1.9993495 0.8257967
-2.1334553 -1.9511923 0.7895548
-2.1320678 -1.9339354 0.7785123
-2.1380721 -1.9775667 0.8088995
-2.1367233 -1.9702949 0.8033926
-2.1307691 -1.8298403 0.7205030
-2.1303247 -1.9070387 0.7610834
-2.1348100 -1.9583811 0.7938261
-2.1296958 -1.8927599 0.7527591
-2.1295716 -1.8641441 0.7371683
-2.1295915 -1.8693508 0.7398061
-2.1363361 -1.9657719 0.7992118
-2.1295386 -1.8734060 0.7417884
-2.1334262 -1.9454933 0.7845452
-2.1403454 -1.9864427 0.8141977
-2.1305789 -1.9034353 0.7582602
-2.1311270 -1.9132378 0.7637005
-2.1415443 -1.9935412 0.8188553
-2.1318894 -1.9233416 0.7697416
-2.1335269 -1.9402982 0.7806719
-2.1326760 -1.9298222 0.7737398
-2.1381591 -1.9728724 0.8032758
-2.1323639 -1.8285009 0.7183287
-2.1307074 -1.8568425 0.7316967
-2.1336603 -1.9370669 0.7779079
-2.1351051 -1.9540815 0.7888080
-2.1401752 -1.9820795 0.8095685
-2.1321666 -1.9200532 0.7666351
-2.1377687 -1.9684538 0.7989983
-2.1347232 -1.9490804 0.7850885
-2.1366715 -1.9620187 0.7940141
-2.1428877 -1.9966616 0.8195463
-2.1416834 -1.9890286 0.8140765
-2.1392573 -1.9753010 0.8035968
-2.1339576 -1.9324729 0.7735347
-2.1412158 -1.9844062 0.8099871
-2.1349656 -1.9434240 0.7804283
-2.1334898 -1.9270346 0.7698424
-2.1322244 -1.9068709 0.7573744
-2.1314963 -1.8782531 0.7408914
-2.1326219 -1.9110075 0.7593677
-2.1426852 -1.9914905 0.8143684
-2.1440901 -1.9990587 0.8198736
-2.1367172 -1.9569197 0.7884705
-2.1316095 -1.8734351 0.7378978
-2.1317723 -1.8691098 0.7357433
-2.1391299 -1.9711195 0.7988008
-2.1320862 -1.8966128 0.7507551
-2.1361090 -1.9518435 0.7847893
-2.1382134 -1.9647231 0.7937767
-2.1348755 -1.9346999 0.7736744
-2.1424430 -1.9867407 0.8101004
-2.1338195 -1.9232202 0.7659727
-2.1334803 -1.8354780 0.7185350
-2.1323523 -1.8565357 0.7285108
-2.1323161 -1.8932332 0.7481198
-2.1335069 -1.9179222 0.7625685
-2.1354771 -1.9401631 0.7769521
-2.1411899 -1.9796549 0.8044197
-2.1362576 -1.9471093 0.7808707
-2.1347148 -1.9298303 0.7698627
-2.1457393 -2.0028507 0.8212676
-2.1328477 -1.8613780 0.7299175
-2.1332722 -1.9033243 0.7529404
-2.1380825 -1.9596964 0.7884863
-2.1443418 -1.9967718 0.8159373
-2.1362742 -1.9432793 0.7778978
-2.1404772 -1.9736845 0.7986972
-2.1424517 -1.9825899 0.8052755
-2.1375379 -1.9546269 0.7844784
-2.1360949 -1.9373195 0.7734922
-2.1339495 -1.9103541 0.7564081
-2.1350045 -1.9260367 0.7659722
-2.1340753 -1.8420903 0.7194917
-2.1333200 -1.8905914 0.7445231
-2.1347199 -1.9206364 0.7622869
-2.1339128 -1.9013392 0.7503656
-2.1402345 -1.9691689 0.7942104
-2.1361742 -1.9327047 0.7694596
-2.1339128 -1.8965958 0.7472987
-2.1343598 -1.9070507 0.7533594
-2.1418667 -1.9767956 0.7993888
-2.1354225 -1.8345378 0.7154915
-2.1337032 -1.8863587 0.7410702
-2.1371213 -1.9398371 0.7737609
-2.1337827 -1.8734059 0.7340936
-2.1380756 -1.9504259 0.7800676
-2.1337063 -1.8781060 0.7366820
-2.1387193 -1.9572579 0.7846361
-2.1377092 -1.9463944 0.7776300
-2.1364487 -1.9296188 0.7661958
-2.1343309 -1.8832849 0.7382908
-2.1416152 -1.9719646 0.7941903
-2.1464389 -1.9999563 0.8149594
-2.1404155 -1.9651517 0.7892471
-2.1347650 -1.8937022 0.7439237
-2.1374107 -1.9353740 0.7692342
-2.1347050 -1.8618275 0.7267914
-2.1362953 -1.9237732 0.7616441
-2.1357453 -1.9146979 0.7559256
-2.1347940 -1.8664421 0.7287964
-2.1356047 -1.9102264 0.7530297
-2.1362977 -1.9203387 0.7590593
-2.1433728 -1.9798979 0.7990734
-2.1462970 -1.9953855 0.8107996
-2.1394304 -1.9531846 0.7797896
-2.1392296 -1.9491692 0.7769969
-2.1354587 -1.8906301 0.7406458
-2.1366193 -1.8420780 0.7158279
-2.1360019 -1.9050143 0.7488565
-2.1386038 -1.9386160 0.7697621
-2.1379726 -1.9326275 0.7656721
-2.1419820 -1.9681348 0.7890636
-2.1432109 -1.9753382 0.7943324
-2.1361408 -1.9011991 0.7462135
-2.1357598 -1.8822271 0.7352855
-2.1374279 -1.8398464 0.7141448
-2.1367471 -1.8477362 0.7174959
-2.1360095 -1.8876241 0.7377713
-2.1447485 -1.9825563 0.7988827
-2.1485639 -2.0031131 0.8142561
-2.1363213 -1.8968970 0.7432137
-2.1359284 -1.8780946 0.7328740
-2.1407916 -1.9557974 0.7792775
-2.1372489 -1.9133396 0.7520482
-2.1367421 -1.8611425 0.7228481
-2.1381172 -1.9238840 0.7580769
-2.1424029 -1.9654916 0.7854214
-2.1482813 -1.9986721 0.8097205
-2.1435438 -1.9709874 0.7886917
-2.1394006 -1.9355995 0.7651988
-2.1369124 -1.8663373 0.7250536
-2.1369891 -1.8703890 0.7270763
-2.1372696 -1.8941588 0.7397070
-2.1450323 -1.9786670 0.7938091
-2.1500147 -2.0057330 0.8140983
-2.1461590 -1.9852526 0.7986565
-2.1410738 -1.9476665 0.7723595
-2.1421158 -1.9591896 0.7796713
-2.1394533 -1.8298558 0.7069320
-2.1385524 -1.8459905 0.7140197
-2.1380922 -1.9050345 0.7449899
-2.1377102 -1.8762235 0.7287824
-2.1377210 -1.8821208 0.7319701
-2.1376958 -1.8907333 0.7367238
-2.1499229 -2.0016650 0.8092100
-2.1379964 -1.8869797 0.7340331
-2.1463451 -1.9812554 0.7936837
-2.1399771 -1.9281205 0.7577103
-2.1433657 -1.9619513 0.7797204
-2.1475351 -1.9880211 0.7983650
-2.1453393 -1.9746210 0.7885802
-2.1423075 -1.9504190 0.7717210
-2.1429415 -1.9568396 0.7757658
-2.1388835 -1.8974531 0.7389075
-2.1387397 -1.8749419 0.7263543
-2.1388336 -1.8658867 0.7215376
-2.1419600 -1.9440502 0.7667553
-2.1449454 -1.9693431 0.7838141
-2.1388907 -1.8712161 0.7240618
-2.1511897 -2.0041450 0.8091917
-2.1475301 -1.9837096 0.7936859
-2.1490293 -1.9914745 0.7990189
-2.1466293 -1.9773784 0.7885990
-2.1424317 -1.8174965 0.6981612
-2.1415640 -1.8293560 0.7034992
-2.1406253 -1.8451657 0.7109119
-2.1394083 -1.8798277 0.7277481
-2.1398310 -1.9087075 0.7438878
-2.1447227 -1.9646156 0.7795185
-2.1396226 -1.8944211 0.7356548
-2.1459157 -1.9722162 0.7847139
-2.1443174 -1.9597163 0.7753654
-2.1407067 -1.8512038 0.7127216
-2.1399188 -1.8868295 0.7307465
-2.1418645 -1.8349760 0.7052902
-2.1401948 -1.9012820 0.7388355
-2.1510396 -1.9999933 0.8043806
-2.1487871 -1.9871126 0.7944006
-2.1401097 -1.8909157 0.7327630
-2.1477257 -1.9798469 0.7888872
-2.1420677 -1.9317495 0.7562720
-2.1403143 -1.8783551 0.7254847
-2.1533398 -2.0094558 0.8107088
-2.1504578 -1.9942171 0.7987482
-2.1445751 -1.9554479 0.7710035
-2.1473151 -1.9750652 0.7846509
-2.1455550 -1.9624514 0.7754261
-2.1525687 -2.0040729 0.8057651
-2.1487963 -1.9822091 0.7889740
-2.1410933 -1.8659350 0.7176771
-2.1424734 -1.9287374 0.7529449
-2.1433777 -1.9389822 0.7592564
-2.1410174 -1.8750922 0.7223954
-2.1414199 -1.8985398 0.7349505
-2.1502478 -1.9897067 0.7939782
-2.1423538 -1.8501510 0.7097928
-2.1413541 -1.8818795 0.7256304
-2.1448588 -1.9509162 0.7661885
-2.1434710 -1.8337321 0.7017534
-2.1444791 -1.8222121 0.6967723
-2.1416602 -1.8865088 0.7275913
-2.1419485 -1.9139662 0.7425973
-2.1474347 -1.9707273 0.7796814
-2.1518870 -1.9969040 0.7985299
-2.1486406 -1.9777085 0.7844727
-2.1539600 -2.0066373 0.8056675
-2.1499913 -1.9847373 0.7889059
-2.1439701 -1.9354636 0.7551639
-2.1421300 -1.8906952 0.7291171
-2.1462002 -1.9585091 0.7700913
-2.1513666 -1.9922436 0.7941991
-2.1450341 -1.9469732 0.7624335
-2.1457204 -1.9533642 0.7665046
-2.1438763 -1.9319482 0.7526186
-2.1457635 -1.8155112 0.6926368
-2.1438151 -1.9269115 0.7486097
-2.1451191 -1.9424575 0.7583295
-2.1459280 -1.8202073 0.6939998
-2.1488055 -1.9733865 0.7794893
-2.1499895 -1.9803054 0.7843386
-2.1524781 -1.9947530 0.7944430
-2.1512452 -1.9873142 0.7887933
-2.1557157 -2.0103385 0.8060595
-2.1429468 -1.8795594 0.7213413
-2.1462459 -1.9499086 0.7623141
-2.1470639 -1.8139672 0.6904180
-2.1432545 -1.8706664 0.7164006
-2.1477040 -1.9616559 0.7697816
-2.1487209 -1.9690026 0.7751879
-2.1497700 -1.9759801 0.7799801
-2.1543345 -2.0024697 0.7995162
-2.1433264 -1.8855093 0.7241777
-2.1438466 -1.9174437 0.7412984
-2.1457081 -1.9393507 0.7547456
-2.1449413 -1.9294527 0.7484874
-2.1454265 -1.9356221 0.7523521
-2.1512876 -1.9829336 0.7841758
-2.1454826 -1.8387206 0.7001892
-2.1439553 -1.8944183 0.7279939
-2.1441133 -1.9140474 0.7386863
-2.1447247 -1.9244068 0.7448575
-2.1536915 -1.9972503 0.7944100
-2.1570294 -2.0127614 0.8060927
-2.1467672 -1.9464061 0.7582185
-2.1440972 -1.8912456 0.7259428
-2.1557018 -2.0050520 0.7993986
-2.1478268 -1.8198599 0.6909988
-2.1458457 -1.9319959 0.7487211
-2.1482819 -1.9591876 0.7659702
-2.1500264 -1.9716923 0.7749641
-2.1477561 -1.9536825 0.7623658
-2.1468231 -1.9421917 0.7547128
-2.1453836 -1.9215199 0.7414403
-2.1468269 -1.9387812 0.7520754
-2.1448682 -1.8833504 0.7201812
-2.1452038 -1.8656111 0.7107617
-2.1499547 -1.9673089 0.7706727
-2.1536838 -1.9918577 0.7881311
-2.1550245 -1.9998505 0.7942791
-2.1516021 -1.9790974 0.7790512
-2.1462102 -1.9273325 0.7444039
-2.1569513 -2.0074855 0.7994264
-2.1457195 -1.9173423 0.7379274
-2.1482722 -1.9494438 0.7576617
-2.1484195 -1.8258884 0.6918839
-2.1455792 -1.8751595 0.7147211
-2.1537683 -1.9888274 0.7848592
-2.1493940 -1.8188506 0.6884528
-2.1457876 -1.8906512 0.7226498
-2.1548419 -1.9942993 0.7881456
-2.1579678 -2.0097726 0.7998653
-2.1500244 -1.9629120 0.7657383
-2.1484056 -1.9453324 0.7540652
-2.1462437 -1.8715667 0.7119567
-2.1494747 -1.9570858 0.7614987
-2.1566875 -2.0035502 0.7946897
-2.1469767 -1.9245750 0.7408758
-2.1482178 -1.9417849 0.7515387
-2.1532589 -1.9827469 0.7792335
-2.1474921 -1.9301327 0.7440475
-2.1517665 -1.9704226 0.7697366
-2.1558915 -1.9967578 0.7884381
-2.1466816 -1.8871456 0.7189871
-2.1497531 -1.9524903 0.7570949
-2.1579424 -2.0059590 0.7947371
-2.1514922 -1.9658439 0.7656277
-2.1475818 -1.9213489 0.7373440
-2.1597540 -2.0139237 0.8009039
-2.1511086 -1.8176273 0.6856045
-2.1479967 -1.8519255 0.7002959
-2.1472589 -1.8839568 0.7163276
-2.1472339 -1.9115027 0.7311533
-2.1474015 -1.9168714 0.7344408
-2.1545654 -1.9855971 0.7791667
-2.1569362 -1.9992235 0.7887208
-2.1495269 -1.9446543 0.7511538
-2.1484682 -1.9276161 0.7403120
-2.1488404 -1.9337316 0.7442019
-2.1502193 -1.9495218 0.7537119
-2.1489556 -1.8462948 0.6966693
-2.1480059 -1.8667603 0.7066979
-2.1479746 -1.8712305 0.7088272
-2.1514201 -1.9613349 0.7611246
-2.1478955 -1.8752364 0.7108499
-2.1477578 -1.8800556 0.7133540
-2.1609903 -2.0163914 0.8011577
-2.1592008 -2.0083194 0.7948448
-2.1529157 -1.9686038 0.7653379
-2.1514608 -1.8242844 0.6863945
-2.1482621 -1.8867077 0.7159120
-2.1482135 -1.9044372 0.7254329
-2.1501199 -1.9402077 0.7466473
-2.1569238 -1.9947465 0.7839123
-2.1581619 -2.0017342 0.7886721
-2.1560006 -1.9883300 0.7789047
-2.1484587 -1.8917325 0.7182451
-2.1492145 -1.9245349 0.7366611
-2.1487891 -1.8961645 0.7200700
-2.1504604 -1.8397681 0.6917507
-2.1489986 -1.9150768 0.7301471
-2.1502945 -1.9368066 0.7436357
-2.1527959 -1.9640800 0.7608555
-2.1545266 -1.9761496 0.7692919
-2.1555711 -1.9834902 0.7747179
-2.1493238 -1.9212205 0.7339770
-2.1499777 -1.9305076 0.7395377
-2.1517791 -1.9526914 0.7530639
-2.1527135 -1.9592627 0.7566425
-2.1507333 -1.8454013 0.6935159
-2.1499990 -1.8572317 0.6989463
-2.1497747 -1.8664141 0.7035921
-2.1596130 -2.0050315 0.7891921
-2.1613626 -2.0128524 0.7954928
-2.1582709 -1.9974556 0.7836745
-2.1496251 -1.8790152 0.7096545
-2.1497898 -1.8705831 0.7054758
-2.1495772 -1.8839806 0.7120342
-2.1575264 -1.9912203 0.7784954
-2.1517208 -1.9434740 0.7459106
-2.1506742 -1.9277985 0.7363112
-2.1568296 -1.9860892 0.7745826
-2.1541116 -1.9666667 0.7607152
-2.1501115 -1.8759713 0.7075307
-2.1499487 -1.9080329 0.7244155
-2.1548335 -1.9718318 0.7642954
-2.1562113 -1.9799765 0.7693056
-2.1595265 -2.0008177 0.7844280
-2.1513470 -1.8511844 0.6948040
-2.1627501 -2.0160221 0.7961525
-2.1504828 -1.8958343 0.7168506
-2.1534001 -1.9558915 0.7523864
-2.1541135 -1.9622660 0.7564598
-2.1512409 -1.9245473 0.7328316
-2.1579952 -1.9885155 0.7746099
-2.1507836 -1.8874242 0.7115082
-2.1616383 -2.0093468 0.7897931
-2.1509870 -1.9012903 0.7188851
-2.1526468 -1.8450294 0.6905275
-2.1517775 -1.8563371 0.6957990
-2.1522951 -1.9354479 0.7385477
-2.1562707 -1.9752331 0.7646943
-2.1592467 -1.9942812 0.7779268
-2.1639297 -2.0184963 0.7964056
-2.1555706 -1.9694596 0.7603954
-2.1536752 -1.9527537 0.7491491
-2.1522437 -1.9315587 0.7359720
-2.1533795 -1.9467867 0.7451036
-2.1608050 -2.0034226 0.7842955
-2.1512577 -1.8834791 0.7089144
-2.1577164 -1.9828975 0.7688651
-2.1518473 -1.8702857 0.7019094
-2.1516866 -1.8795490 0.7064964
-2.1517328 -1.9162826 0.7260829
-2.1601398 -1.9972759 0.7790243
-2.1593515 -1.9919725 0.7752770
-2.1531373 -1.8504736 0.6920222
-2.1521208 -1.8755513 0.7040021
-2.1550857 -1.9596654 0.7520973
-2.1651328 -2.0209338 0.7964389
-2.1531216 -1.8555545 0.6935725
-2.1620541 -2.0060606 0.7844093
-2.1542101 -1.8384940 0.6856486
-2.1521281 -1.9081051 0.7205120
-2.1526033 -1.9224648 0.7287344
-2.1539746 -1.9446409 0.7422403
-2.1576991 -1.9782870 0.7644634
-2.1634297 -2.0124699 0.7894067
-2.1537191 -1.9386686 0.7382217
-2.1563705 -1.9673641 0.7565801
-2.1569191 -1.9721834 0.7601383
-2.1590463 -1.9855512 0.7686746
-2.1544276 -1.8438072 0.6876243
-2.1525752 -1.9005032 0.7156454
-2.1614369 -1.9998900 0.7788755
-2.1553711 -1.9560166 0.7484240
-2.1550143 -1.9507539 0.7449719
-2.1527923 -1.8871513 0.7078419
-2.1529435 -1.9049719 0.7173191
-2.1608713 -1.9947493 0.7746742
-2.1646749 -2.0148876 0.7894482
-2.1532398 -1.9196624 0.7252271
-2.1564902 -1.9627680 0.7518440
-2.1537785 -1.8610932 0.6942355
-2.1589140 -1.9809169 0.7642906
-2.1533164 -1.8831727 0.7054316
-2.1634386 -2.0086492 0.7842831
-2.1548633 -1.8497311 0.6892493
-2.1537528 -1.8700680 0.6987175
-2.1539170 -1.9256090 0.7284804
-2.1583517 -1.9757814 0.7606881
-2.1602059 -1.9881205 0.7688738
-2.1537763 -1.8750127 0.7010583
-2.1555805 -1.9479061 0.7415059
-2.1627078 -2.0024375 0.7787893
-2.1659536 -2.0179645 0.7904532
-2.1566888 -1.8309761 0.6797169
-2.1546368 -1.8592703 0.6923692
-2.1550378 -1.9363854 0.7339203
-2.1552994 -1.9417208 0.7372724
-2.1581944 -1.9709041 0.7561954
-2.1646798 -2.0111942 0.7844792
-2.1622242 -1.9975732 0.7746297
-2.1562589 -1.8428304 0.6846838
-2.1554987 -1.8547871 0.6899711
-2.1543123 -1.9128440 0.7192742
-2.1614146 -1.9906151 0.7688314
-2.1579407 -1.9656592 0.7514151
-2.1603375 -1.9838090 0.7638765
-2.1638584 -2.0050045 0.7789795
-2.1549321 -1.9232457 0.7246092
-2.1598994 -1.9787890 0.7601688
-2.1548238 -1.9088643 0.7160961
-2.1547006 -1.9045034 0.7138586
-2.1561238 -1.9390577 0.7336582
-2.1548471 -1.8960244 0.7089962
-2.1658650 -2.0135059 0.7846171
-2.1567909 -1.8488269 0.6861676
-2.1595859 -1.9738273 0.7560826
-2.1623407 -1.9934419 0.7697775
-2.1636274 -2.0004265 0.7745578
-2.1572776 -1.9512038 0.7407191
-2.1557174 -1.8746505 0.6975214
-2.1557947 -1.8663785 0.6929059
-2.1616064 -1.9866631 0.7638259
-2.1578712 -1.8418820 0.6820847
-2.1650975 -2.0074885 0.7789532
-2.1667912 -2.0161118 0.7858264
-2.1684052 -2.0228353 0.7907607
-2.1586768 -1.9632617 0.7475322
-2.1572189 -1.8540097 0.6872322
-2.1613627 -1.9817313 0.7597185
-2.1636665 -1.9962693 0.7697344
-2.1595110 -1.8303318 0.6761690
-2.1559137 -1.8889158 0.7033196
-2.1564330 -1.9269027 0.7243107
-2.1649501 -2.0030597 0.7743897
-2.1572172 -1.8602319 0.6889175
-2.1575302 -1.9429171 0.7335676
-2.1586702 -1.8473254 0.6830289
-2.1629988 -1.9899270 0.7643557
-2.1697515 -2.0254372 0.7906294
-2.1588630 -1.9551920 0.7405638
-2.1616010 -1.9786550 0.7564542
-2.1682847 -2.0187596 0.7856426
-2.1566298 -1.9134691 0.7153393
-2.1566133 -1.9091993 0.7130407
-2.1662135 -2.0062466 0.7750121
-2.1603843 -1.9665389 0.7467851
-2.1602019 -1.8369206 0.6771925
-2.1575508 -1.9296410 0.7239839
-2.1581551 -1.9392702 0.7296022
-2.1589716 -1.9495575 0.7358677
-2.1628584 -1.9846754 0.7592569
-2.1573565 -1.9236284 0.7200385
-2.1571476 -1.9008746 0.7076600
-2.1641568 -1.9924538 0.7645945
-2.1677624 -2.0132210 0.7797755
-2.1580626 -1.8656292 0.6892675
-2.1584807 -1.9343143 0.7255694
-2.1591643 -1.9461488 0.7328720
-2.1696644 -2.0213871 0.7854840
-2.1601716 -1.8468187 0.6806925
-2.1674089 -2.0087197 0.7750023
-2.1580617 -1.8932935 0.7016818
-2.1653112 -1.9949119 0.7645876
-2.1615014 -1.8356417 0.6748120
-2.1691548 -2.0157569 0.7796980
-2.1635439 -1.9819822 0.7553298
-2.1619761 -1.9705233 0.7469838
-2.1666028 -2.0018095 0.7691414
-2.1595118 -1.9430881 0.7295771
-2.1709201 -2.0238518 0.7857310
-2.1585048 -1.9132578 0.7116543
-2.1586472 -1.9173533 0.7136491
-2.1596761 -1.8643746 0.6865342
-2.1617886 -1.9648094 0.7423383
-2.1591449 -1.9279285 0.7195959
-2.1686321 -2.0112491 0.7752250
-2.1609772 -1.9530732 0.7345558
-2.1703306 -2.0181950 0.7799921
-2.1656555 -1.9909804 0.7595600
-2.1592742 -1.9008078 0.7038822
-2.1593806 -1.9052320 0.7060582
-2.1679832 -2.0046224 0.7691042
-2.1721684 -2.0262203 0.7858344
-2.1651145 -1.9858568 0.7556254
-2.1668023 -1.9976518 0.7640114
-2.1602989 -1.8709828 0.6875157
-2.1596674 -1.8926352 0.6983108
-2.1608405 -1.9394882 0.7243948
-2.1630171 -1.9675604 0.7420359
-2.1700039 -2.0138633 0.7750784
-2.1715534 -2.0206193 0.7800279
-2.1646252 -1.9788111 0.7496133
-2.1733010 -2.0285957 0.7861815
-2.1668906 -1.9935217 0.7594728
-2.1641339 -1.9740395 0.7456841
-2.1625653 -1.9573291 0.7345152
-2.1603003 -1.8981525 0.7003172
-2.1621864 -1.9531763 0.7321572
-2.1630782 -1.9626642 0.7379087
-2.1604101 -1.9173420 0.7101817
-2.1694960 -2.0079342 0.7693079
-2.1605332 -1.9220716 0.7128113
-2.1655192 -1.9811774 0.7500059
-2.1713267 -2.0164184 0.7752658
-2.1611518 -1.9316091 0.7181171
-2.1666916 -1.9888135 0.7551557
-2.1612292 -1.8768080 0.6881586
-2.1611360 -1.9279953 0.7156732
-2.1688402 -2.0018534 0.7639847
-2.1643080 -1.9710142 0.7423601
-2.1679822 -1.9960338 0.7597258
-2.1706281 -2.0104742 0.7695239
-2.1656611 -1.9769686 0.7452455
-2.1621787 -1.8706247 0.6844764
-2.1622543 -1.9387691 0.7211193
-2.1628971 -1.9483744 0.7267511
-2.1615463 -1.9050058 0.7019275
-2.1667660 -1.9837738 0.7498638
-2.1725371 -2.0188278 0.7753142
-2.1647370 -1.9664137 0.7376298
-2.1691532 -1.9984463 0.7597564
-2.1682020 -1.9916507 0.7548036
-2.1643274 -1.9603944 0.7335879
-2.1619341 -1.8974581 0.6969970
-2.1658349 -1.9739650 0.7419089
-2.1641423 -1.9566161 0.7309150
-2.1718157 -2.0129000 0.7695663
-2.1667976 -1.9793445 0.7453052
-2.1626433 -1.9261184 0.7114401
-2.1681498 -1.9873157 0.7504627
-2.1738904 -2.0219480 0.7760212
-2.1624381 -1.9220833 0.7089147
-2.1626168 -1.9023479 0.6983806
-2.1702319 -2.0007933 0.7598531
-2.1633431 -1.9364314 0.7172296
-2.1643980 -1.9521867 0.7267495
-2.1659227 -1.9692741 0.7375797
-2.1631858 -1.9324565 0.7147086
-2.1695344 -1.9943846 0.7545381
-2.1678310 -1.9822507 0.7461464
-2.1653252 -1.8486183 0.6715220
-2.1630139 -1.8860973 0.6887942
-2.1629647 -1.8952217 0.6935338
-2.1714852 -2.0072187 0.7635557
-2.1631507 -1.8816205 0.6866856
-2.1641229 -1.9426561 0.7198557
-2.1731127 -2.0153652 0.7695598
-2.1749647 -2.0243632 0.7763451
-2.1674335 -1.9769484 0.7414157
-2.1658133 -1.9600569 0.7303872
-2.1634250 -1.9101265 0.7007227
-2.1707376 -1.9976283 0.7554041
-2.1688501 -1.9847640 0.7464053
-2.1671826 -1.9719616 0.7373456
-2.1657843 -1.9550789 0.7263228
-2.1640170 -1.9016984 0.6954716
-2.1744270 -2.0180302 0.7696356
-2.1669905 -1.9669683 0.7336403
-2.1666599 -1.8473304 0.6691742
-2.1645977 -1.8763306 0.6823279
-2.1655236 -1.9500969 0.7226160
-2.1761329 -2.0267774 0.7763964
-2.1733760 -2.0119142 0.7643492
-2.1703974 -1.9921339 0.7505220
-2.1647482 -1.9306440 0.7104169
-2.1645142 -1.9261010 0.7075800
-2.1688413 -1.9798460 0.7413327
-2.1718066 -1.9999708 0.7555040
-2.1651308 -1.9362323 0.7135336
-2.1649972 -1.8812253 0.6836702
-2.1647233 -1.9074106 0.6973024
-2.1643092 -1.9159260 0.7013155
-2.1683328 -1.9746580 0.7374455
-2.1658012 -1.9469090 0.7194450
-2.1668701 -1.9578284 0.7263754
-2.1674781 -1.9632570 0.7296924
-2.1651147 -1.8858000 0.6852440
-2.1650490 -1.8989893 0.6919667
-2.1758674 -2.0213049 0.7701838
-2.1704740 -1.9877458 0.7459145
-2.1666622 -1.9526488 0.7224876
-2.1659698 -1.8743305 0.6794869
-2.1745745 -2.0143387 0.7643810
-2.1684837 -1.9699311 0.7331572
-2.1699032 -1.9821895 0.7414073
-2.1718452 -1.9950274 0.7501150
-2.1694752 -1.9773171 0.7375788
-2.1675672 -1.8541160 0.6695218
-2.1667349 -1.8707149 0.6767836
-2.1656837 -1.8917417 0.6867983
-2.1679916 -1.9603509 0.7262778
-2.1770209 -2.0237604 0.7701953
-2.1660701 -1.9062956 0.6943191
-2.1666622 -1.9343449 0.7093125
-2.1674151 -1.9501038 0.7187499
-2.1690259 -1.9670449 0.7297273
-2.1661863 -1.9150263 0.6982559
-2.1670271 -1.9398713 0.7124844
-2.1665164 -1.9304155 0.7067415
-2.1681713 -1.9555836 0.7220331
-2.1660989 -1.9205544 0.7005940
-2.1698686 -1.9727626 0.7328119
-2.1707677 -1.9806658 0.7380070
-2.1732012 -1.9977252 0.7498849
-2.1718418 -1.9874636 0.7426591
-2.1670209 -1.8851177 0.6819439
-2.1673439 -1.8812517 0.6798654
-2.1667514 -1.8984101 0.6885330
-2.1668619 -1.9035562 0.6912535
-2.1726273 -1.9913663 0.7448394
-2.1752859 -2.0109207 0.7585712
-2.1678465 -1.9468915 0.7156168
-2.1669526 -1.8905740 0.6843096
-2.1691574 -1.8534662 0.6666838
-2.1743098 -2.0009415 0.7507750
-2.1675093 -1.9123012 0.6948573
-2.1801270 -2.0336189 0.7745170
-2.1705486 -1.9700470 0.7292331
-2.1689295 -1.9531051 0.7182312
-2.1711407 -1.9754591 0.7325671
-2.1696378 -1.9585713 0.7215455
-2.1682963 -1.9376938 0.7085048
-2.1721846 -1.9832837 0.7375223
-2.1811243 -2.0363875 0.7758180
-2.1679329 -1.9102271 0.6929945
-2.1687720 -1.9441681 0.7120417
-2.1682251 -1.9338379 0.7058384
-2.1699252 -1.8591323 0.6673722
-2.1771130 -2.0156738 0.7593111
-2.1679982 -1.9198239 0.6972992
-2.1680468 -1.9239805 0.6992792
-2.1695944 -1.9502618 0.7147699
-2.1692664 -1.8763920 0.6747032
-2.1786771 -2.0215359 0.7632269
-2.1803789 -2.0297495 0.7694306
-2.1702441 -1.9560857 0.7180889
-2.1688671 -1.8899180 0.6809874
-2.1687762 -1.9162555 0.6946131
-2.1710325 -1.9620404 0.7218485
-2.1688695 -1.8945202 0.6830011
-2.1720779 -1.9730844 0.7286815
-2.1695784 -1.9413680 0.7085594
-2.1690017 -1.9027599 0.6869631
-2.1729624 -1.9797757 0.7324778
-2.1785157 -2.0187592 0.7600336
-2.1814782 -2.0334367 0.7711950
-2.1694762 -1.8862331 0.6783770
-2.1697243 -1.9371889 0.7054237
-2.1801282 -2.0254200 0.7645238
-2.1723528 -1.9698387 0.7255477
-2.1718982 -1.8540111 0.6624909
-2.1695808 -1.9145757 0.6924517
-2.1705999 -1.9477177 0.7110663
-2.1759430 -1.9984705 0.7440831
-2.1695557 -1.9235629 0.6965679
-2.1717070 -1.8591692 0.6645775
-2.1711414 -1.9533351 0.7141855
-2.1698931 -1.9004339 0.6842319
-2.1723176 -1.9648411 0.7215034
-2.1734155 -1.9766542 0.7288864
-2.1707938 -1.9441874 0.7081695
-2.1713196 -1.8707991 0.6691187
-2.1709828 -1.8755089 0.6715280
-2.1706537 -1.8840200 0.6756015
-2.1702844 -1.9338889 0.7019319
-2.1799395 -2.0213938 0.7598657
-2.1812642 -2.0278789 0.7648041
-2.1702104 -1.9194595 0.6938498
-2.1744598 -1.9827858 0.7319494
-2.1712426 -1.9411765 0.7052442
-2.1708894 -1.8940787 0.6795743
-2.1738257 -1.9730584 0.7252068
-2.1763648 -1.8223596 0.6475931
-2.1837997 -2.0387229 0.7722137
-2.1723829 -1.8646633 0.6654117
-2.1708562 -1.8993113 0.6821011
-2.1825259 -2.0310638 0.7657039
-2.1709919 -1.9311936 0.6987583
-2.1777010 -2.0033357 0.7447371
-2.1725954 -1.9562953 0.7137260
-2.1719420 -1.9471311 0.7080537
-2.1715245 -1.8903885 0.6769034
-2.1713480 -1.9075971 0.6856399
-2.1739489 -1.9682175 0.7210260
-2.1771593 -1.9981379 0.7408764
-2.1712406 -1.9266404 0.6956003
-2.1725309 -1.9513245 0.7100439
-2.1713969 -1.9037592 0.6834338
-2.1734157 -1.9627769 0.7173353
-2.1738386 -1.8591124 0.6613421
-2.1817815 -2.0246092 0.7591433
-2.1758274 -1.8389133 0.6526423
-2.1719338 -1.9239051 0.6932324
-2.1719777 -1.9187175 0.6905884
-2.1838851 -2.0336415 0.7655917
-2.1723675 -1.9377500 0.7007097
-2.1761673 -1.9860201 0.7308710
-2.1753853 -1.9767906 0.7249067
-2.1732645 -1.8759728 0.6678866
-2.1733216 -1.9500841 0.7075938
-2.1731139 -1.8800854 0.6697496
-2.1725920 -1.9344047 0.6980866
-2.1740813 -1.9600064 0.7137998
-2.1761257 -1.9826703 0.7281958
-2.1742852 -1.8637466 0.6623337
-2.1791590 -2.0061361 0.7440977
-2.1730085 -1.9445045 0.7040328
-2.1729089 -1.8894290 0.6742331
-2.1726682 -1.8986516 0.6788347
-2.1726175 -1.9025939 0.6808654
-2.1748131 -1.9656705 0.7169312
-2.1830248 -2.0270523 0.7591610
-2.1849205 -2.0358941 0.7658120
-2.1730106 -1.9308833 0.6952044
-2.1788502 -2.0012902 0.7399099
-2.1753489 -1.8567395 0.6583084
-2.1731991 -1.8948948 0.6761954
-2.1730841 -1.9072549 0.6825129
-2.1731136 -1.9111841 0.6846500
-2.1820421 -2.0210170 0.7537771
-2.1743838 -1.9555919 0.7096402
-2.1759776 -1.9727193 0.7204228
-2.1841578 -2.0293174 0.7593477
-2.1749553 -1.8702501 0.6634363
-2.1814549 -2.0164806 0.7493414
-2.1859914 -2.0382636 0.7661749
-2.1778379 -1.9896025 0.7301943
-2.1736214 -1.9275458 0.6922303
-2.1806943 -2.0099914 0.7443977
-2.1832588 -2.0233350 0.7539073
-2.1743105 -1.9422802 0.7001061
-2.1777894 -1.9860883 0.7272934
-2.1741311 -1.9236944 0.6896194
-2.1795339 -1.8283679 0.6448164
-2.1761644 -1.8633004 0.6594122
-2.1751915 -1.8751867 0.6646833
-2.1742821 -1.9375212 0.6970542
-2.1748485 -1.9480582 0.7030604
-2.1742546 -1.9060650 0.6799592
-2.1853416 -2.0323678 0.7603869
-2.1802987 -2.0043063 0.7393855
-2.1744542 -1.9023566 0.6777326
-2.1781382 -1.8448146 0.6509127
-2.1791646 -1.8372616 0.6473666
-2.1762882 -1.8689623 0.6610803
-2.1748532 -1.9155060 0.6841627
-2.1874462 -2.0408831 0.7660189
-2.1749038 -1.8985064 0.6751671
-2.1754004 -1.8808866 0.6663546
-2.1844928 -2.0263205 0.7547536
-2.1762488 -1.9589050 0.7085020
-2.1749880 -1.9347375 0.6939786
-2.1831953 -2.0195231 0.7487793
-2.1752563 -1.8945535 0.6726737
-2.1865294 -2.0348598 0.7606328
-2.1823169 -2.0131083 0.7437759
-2.1810568 -1.8270442 0.6425962
-2.1780103 -1.9765161 0.7188450
-2.1796244 -1.9936245 0.7296772
-2.1816003 -2.0071512 0.7393330
-2.1776042 -1.8622192 0.6568835
-2.1766767 -1.9572164 0.7064203
-2.1856792 -2.0288224 0.7549891
-2.1887306 -2.0432762 0.7660825
-2.1797238 -1.8432902 0.6482140
-2.1763553 -1.9461550 0.6988534
-2.1781945 -1.9731108 0.7158515
-2.1766870 -1.8788596 0.6635188
-2.1796639 -1.9902574 0.7266462
-2.1759963 -1.9275347 0.6883969
-2.1767075 -1.9524037 0.7025894
-2.1762116 -1.9420453 0.6964215
-2.1877493 -2.0372995 0.7606554
-2.1847005 -2.0222260 0.7485439
-2.1777048 -1.8751810 0.6609949
-2.1764458 -1.9107628 0.6787993
-2.1779062 -1.9621887 0.7077260
-2.1797695 -1.9849206 0.7220173
-2.1819403 -2.0031271 0.7343896
-2.1829765 -2.0099018 0.7390536
-2.1869487 -2.0312822 0.7549899
-2.1839185 -2.0159260 0.7431296
-2.1811901 -1.9965576 0.7292259
-2.1769544 -1.9021851 0.6736783
-2.1889557 -2.0396903 0.7607108
-2.1774740 -1.8853996 0.6646249
-2.1819652 -1.8346550 0.6427464
-2.1784135 -1.8729733 0.6592516
-2.1770892 -1.9155585 0.6802910
-2.1770650 -1.9391923 0.6929998
-2.1859225 -2.0245259 0.7486909
-2.1784901 -1.9608297 0.7053781
-2.1881728 -2.0336442 0.7550827
-2.1840401 -1.8244072 0.6381111
-2.1816453 -1.8429390 0.6452345
-2.1811075 -1.8495262 0.6481174
-2.1777678 -1.8989114 0.6706299
-2.1823348 -1.9991938 0.7293714
-2.1851759 -2.0186501 0.7431789
-2.1799202 -1.9767267 0.7147889
-2.1844370 -2.0135334 0.7395619
-2.1816404 -1.9938592 0.7256218
-2.1783459 -1.8827057 0.6622369
-2.1836536 -2.0068595 0.7344922
-2.1798131 -1.8671254 0.6553742
-2.1870689 -2.0269576 0.7489968
-2.1782154 -1.9459644 0.6951594
-2.1779855 -1.9271275 0.6849281
-2.1814160 -1.9890372 0.7217454
-2.1787325 -1.9560373 0.7011605
-2.1779634 -1.9313531 0.6867527
-2.1834448 -1.8327338 0.6403917
-2.1825446 -1.8399892 0.6431179
-2.1893000 -2.0360363 0.7554225
-2.1795789 -1.8803523 0.6597320
-2.1855607 -1.8230852 0.6358922
-2.1788035 -1.9198898 0.6797867
-2.1807374 -1.9726185 0.7100026
-2.1815946 -1.9843842 0.7173949
-2.1883227 -2.0293119 0.7490933
-2.1869606 -2.0229588 0.7440490
-2.1915518 -2.0444813 0.7608440
-2.1859881 -2.0164367 0.7391399
-2.1802262 -1.9650123 0.7050535
-2.1850659 -2.0096169 0.7342066
-2.1813288 -1.8661607 0.6528571
-2.1905351 -2.0384326 0.7554840
-2.1803796 -1.8782433 0.6579290
-2.1816805 -1.9810228 0.7143577
-2.1834435 -1.9971582 0.7248398
-2.1816128 -1.9752878 0.7101084
-2.1798928 -1.8898276 0.6624730
-2.1896428 -2.0323462 0.7498699
-2.1883497 -2.0261889 0.7449189
-2.1832372 -1.9922110 0.7207380
-2.1860868 -2.0120995 0.7344887
-2.1827317 -1.9870653 0.7171515
-2.1806336 -1.9597380 0.7000470
-2.1801587 -1.9505962 0.6944165
-2.1870300 -1.8211617 0.6335054
-2.1802669 -1.8877182 0.6610702
-2.1799837 -1.9456380 0.6915403
-2.1797814 -1.9312140 0.6834331
-2.1917263 -2.0409103 0.7557418
-2.1873979 -2.0191790 0.7388682
-2.1907548 -2.0347270 0.7502221
-2.1848983 -2.0000110 0.7244634
-2.1819002 -1.9684852 0.7041235
-2.1870950 -2.0143650 0.7346547
-2.1828649 -1.9781346 0.7097104
-2.1897169 -2.0287270 0.7448409
-2.1930254 -2.0440957 0.7566491
-2.1839567 -1.9899184 0.7171094
-2.1885632 -2.0217209 0.7390863
-2.1858579 -1.8383448 0.6378268
-2.1852173 -1.8456347 0.6411227
-2.1847729 -1.9954051 0.7203971
-2.1864827 -2.0079231 0.7293683
-2.1818392 -1.8846598 0.6576440
-2.1919041 -2.0371390 0.7505438
-2.1860904 -2.0032107 0.7250464
-2.1824008 -1.9640888 0.6995572
-2.1891043 -1.8208003 0.6306745
-2.1839391 -1.8703138 0.6510931
-2.1833238 -1.9751102 0.7064040
-2.1874472 -2.0102379 0.7298092
-2.1941929 -2.0463833 0.7568139
-2.1884345 -2.0170151 0.7344696
-2.1910286 -2.0311719 0.7448518
-2.1896405 -2.0240272 0.7392246
-2.1820903 -1.9541791 0.6930194
-2.1828123 -1.8828720 0.6555753
-2.1820336 -1.9502574 0.6904190
-2.1885541 -1.8291178 0.6329798
-2.1823646 -1.8950548 0.6608435
-2.1931830 -2.0395592 0.7505951
-2.1844024 -1.9813603 0.7090004
-2.1855397 -1.9928271 0.7163502
-2.1836486 -1.9720765 0.7030877
-2.1906456 -2.0269491 0.7403894
-2.1953341 -2.0486372 0.7570281
-2.1898006 -2.0204735 0.7351387
-2.1829339 -1.8933582 0.6590844
-2.1922878 -2.0335503 0.7449264
-2.1887488 -2.0128916 0.7296169
-2.1944225 -2.0419924 0.7506228
-2.1873235 -2.0014036 0.7206360
-2.1841465 -1.9675663 0.6986349
-2.1837528 -1.8898223 0.6564087
-2.1835704 -1.9577898 0.6923363
-2.1859222 -1.9884897 0.7117075
-2.1851363 -1.9791879 0.7057863
-2.1920960 -2.0295535 0.7402462
-2.1870625 -1.9957222 0.7159364
-2.1899061 -2.0153440 0.7296135
-2.1911953 -2.0231093 0.7349673
-2.1861744 -1.9855207 0.7086958
-2.1839651 -1.9544204 0.6893153
-2.1943035 -2.0378741 0.7457732
-2.1956733 -2.0444748 0.7506049
-2.1887627 -2.0041631 0.7203486
-2.1889530 -1.8443662 0.6350085
-2.1850220 -1.8885504 0.6540163
-2.1839275 -1.9135376 0.6661279
-2.1881575 -1.9989842 0.7167813
-2.1899160 -2.0111298 0.7251585
-2.1910382 -2.0178862 0.7298406
-2.1859358 -1.9767053 0.7020142
-2.1923437 -2.0256864 0.7351551
-2.1935378 -2.0320409 0.7399277
-2.1858175 -1.9709439 0.6977981
-2.1968641 -2.0475589 0.7516136
-2.1868227 -1.9827412 0.7051536
-2.1844198 -1.9412715 0.6797120
-2.1879954 -1.9942301 0.7124952
-2.1955070 -2.0402871 0.7458211
-2.1910070 -2.0134574 0.7252694
-2.1922928 -2.0212055 0.7306376
-2.1895978 -2.0020342 0.7165698
-2.1935213 -2.0280999 0.7351931
-2.1948819 -2.0346919 0.7400300
-2.1968075 -2.0434894 0.7467161
-2.1859551 -1.9580837 0.6878484
-2.1910453 -2.0092856 0.7207801
-2.1881939 -1.8665378 0.6410784
-2.1860452 -1.8994935 0.6562983
-2.1855655 -1.9171637 0.6650601
-2.1865221 -1.9648248 0.6915788
-2.1877750 -1.9803905 0.7012751
-2.1894111 -1.9969890 0.7122199
-2.1922243 -2.0166133 0.7259038
-2.1873766 -1.9748570 0.6976805
-2.1989489 -2.0519262 0.7524344
-2.1947035 -2.0306401 0.7354108
-2.1885645 -1.9860716 0.7043638
-2.1962064 -2.0383359 0.7415496
-2.1937304 -2.0237530 0.7302393
-2.1873298 -1.9690554 0.6931352
-2.1894079 -1.9916875 0.7075346
-2.1909320 -2.0047135 0.7163477
-2.1980696 -2.0459714 0.7466985
-2.1972071 -2.0407870 0.7421174
-2.1862945 -1.9457863 0.6786229
-2.1906472 -1.9997708 0.7122552
-2.1934215 -2.0192138 0.7260775
-2.1867622 -1.9144718 0.6615897
-2.1960406 -2.0331868 0.7353229
-2.1883037 -1.9717298 0.6932506
-2.1877326 -1.9623567 0.6874321
-2.1950362 -2.0263568 0.7300992
-2.1907395 -1.9950704 0.7079252
-2.1891331 -1.9781999 0.6968872
-2.1932184 -2.0139889 0.7209521
-2.1923135 -2.0073968 0.7161256
-2.1896144 -1.9835801 0.7002349
-2.1903643 -1.9901233 0.7041669
-2.1985804 -2.0439613 0.7427623
-2.1885716 -1.9683481 0.6902605
-2.1880043 -1.9588403 0.6845274
-2.1947741 -2.0218385 0.7259161
-2.1893876 -1.9752173 0.6938975
-2.1877935 -1.9263360 0.6659676
-2.1880369 -1.9530624 0.6804118
-2.1922529 -2.0027510 0.7117633
-2.1942972 -2.0171060 0.7219360
-2.1961806 -2.0289460 0.7302785
-2.1906313 -1.9867343 0.7008256
-2.1920270 -1.9977546 0.7076967
-2.1937031 -2.0107695 0.7165488
-2.1902708 -1.8728837 0.6387512
-2.1883805 -1.9097130 0.6562502
-2.1882135 -1.9306929 0.6672892
-2.1883706 -1.9495939 0.6774640
-2.1960899 -2.0246268 0.7259128
-2.1894774 -1.9657355 0.6866131
-2.1999866 -2.0464701 0.7424417
-2.1933688 -2.0052088 0.7117319
-2.1954868 -2.0195549 0.7219370
-2.1900549 -1.8895747 0.6455988
-2.1895378 -1.9008015 0.6511210
-2.1889146 -1.9251206 0.6634876
-2.1887162 -1.9461144 0.6745136
-2.1975008 -2.0316920 0.7303088
-2.1988874 -2.0390681 0.7357172
-2.1908826 -1.9781353 0.6934561
-2.1912374 -1.9818526 0.6958073
-2.1932014 -2.0002908 0.7076026
-2.1896108 -1.9567795 0.6800363
-2.1905560 -1.9717427 0.6890303
-2.1899988 -1.9625985 0.6833808
-2.1918562 -1.8709810 0.6364345
-2.1903125 -1.8946627 0.6473258
-2.1951222 -2.0135140 0.7162760
-2.1923619 -1.9913895 0.7013348
-2.1973718 -2.0272511 0.7257517
-2.1968031 -2.0222627 0.7220101
-2.1947041 -2.0087365 0.7123390
-2.1932679 -1.9957937 0.7034388
-2.1987671 -2.0342367 0.7302232
-2.1906776 -1.8995642 0.6486509
-2.1900879 -1.9172572 0.6573447
-2.1900353 -1.9303246 0.6642184
-2.1898859 -1.9394809 0.6689113
-2.1898684 -1.9434225 0.6710176
-2.2001379 -2.0415695 0.7356781
-2.2018795 -2.0497626 0.7418997
-2.1942667 -2.0028661 0.7078108
-2.1901072 -1.9218230 0.6596697
-2.1900919 -1.9353902 0.6665277
-2.1912022 -1.9688476 0.6856121
-2.1917021 -1.9753414 0.6895797
-2.1902074 -1.9492171 0.6738799
-2.1909263 -1.9599204 0.6798021
-2.1918650 -1.8847458 0.6403679
-2.1910397 -1.9057266 0.6505156
-2.1925236 -1.9810699 0.6926325
-2.1906631 -1.9137815 0.6544329
-2.1985701 -2.0297348 0.7257219
-2.1964916 -2.0162283 0.7160318
-2.1938918 -1.9945386 0.7010615
-2.2029777 -2.0521875 0.7422103
-2.1961137 -2.0115413 0.7120133
-2.2001952 -2.0376151 0.7306628
-2.1918740 -1.9661537 0.6824123
-2.1946907 -1.9986496 0.7030541
-2.1954664 -2.0054196 0.7077040
-2.1920961 -1.8943353 0.6442201
-2.1928572 -1.9781153 0.6896235
-2.1983481 -2.0250555 0.7213810
-2.1940304 -1.9886034 0.6956937
-2.1926599 -1.9728589 0.6858073
-2.1915872 -1.9296441 0.6613170
-2.1915169 -1.9467882 0.6702102
-2.1915647 -1.9426281 0.6678670
-2.1924657 -1.8992223 0.6455595
-2.1917458 -1.9523800 0.6732532
-2.1979127 -2.0191290 0.7159292
-2.2001411 -2.0333848 0.7262079
-2.2021689 -2.0449811 0.7347612
-2.2042191 -2.0546816 0.7421816
-2.1923291 -1.9628532 0.6793272
-2.1938729 -1.9838830 0.6923025
-2.1920581 -1.9259499 0.6586650
-2.1919204 -1.9390594 0.6654711
-2.1926267 -1.9045903 0.6475742
-2.1920947 -1.9217843 0.6562434
-2.1967550 -2.0082550 0.7076756
-2.1949211 -1.9910234 0.6960405
-2.1975996 -2.0143700 0.7116621
-2.2016700 -2.0404134 0.7303374
-2.1924094 -1.9133528 0.6514030
-2.1922170 -1.9350617 0.6629442
-2.1957575 -1.9978595 0.7002688
-2.1941275 -1.9808994 0.6892841
-2.1997704 -2.0278815 0.7210342
-2.1928854 -1.9599499 0.6762857
-2.1926337 -1.9185389 0.6536323
-2.1929532 -1.9095252 0.6488449
-2.1991327 -2.0216270 0.7158841
-2.1950069 -1.9874375 0.6928681
-2.2014192 -2.0360027 0.7260539
-2.2054782 -2.0572536 0.7420819
-2.1929099 -1.9508920 0.6703137
-2.1948177 -1.8776099 0.6336527
-2.1930234 -1.9562891 0.6735310
-2.2039774 -2.0493916 0.7358159
-2.1941218 -1.9757859 0.6853204
-2.1937053 -1.9701533 0.6818272
-2.1940705 -1.8895546 0.6389872
-2.1940119 -1.8941253 0.6410409
-2.1930955 -1.9461366 0.6672943
-2.1940450 -1.9670096 0.6790143
-2.1989473 -2.0171186 0.7113832
-2.1983463 -2.0120064 0.7077560
-2.1971014 -2.0012920 0.7006177
-2.1943477 -1.8984965 0.6422919
-2.2002653 -2.0242310 0.7160528
-2.1935635 -1.9424568 0.6645690
-2.1935789 -1.9341297 0.6602466
-2.2033720 -2.0434010 0.7298341
-2.1955561 -1.9838456 0.6888098
-2.2068122 -2.0604504 0.7427148
-2.2026269 -2.0385194 0.7259967
-2.1952227 -1.9783449 0.6852052
-2.1969760 -1.9958604 0.6960489
-2.2016959 -1.8306421 0.6132541
-2.1992350 -1.8485068 0.6198546
-2.1982214 -2.0071116 0.7036078
-2.1945571 -1.9632255 0.6755617
-2.1940546 -1.9387642 0.6618588
-2.1941751 -1.9257526 0.6549517
-2.1966676 -1.9906217 0.6921913
-2.1953441 -1.9733669 0.6811541
-2.1947133 -1.9086175 0.6457320
-2.1944641 -1.9171197 0.6498228
-2.1945967 -1.9539304 0.6693395
-2.1958542 -1.8890510 0.6360716
-2.1946950 -1.9133445 0.6476112
-2.1946131 -1.9224837 0.6523353
-2.1970881 -1.8719642 0.6282535
-2.1967549 -1.8772415 0.6306991
-2.1948797 -1.9598298 0.6725856
-2.2014873 -2.0274694 0.7166111
-2.2062839 -2.0546447 0.7368325
-2.2046174 -2.0460170 0.7299723
-2.1946311 -1.9501311 0.6670314
-2.2000267 -2.0151275 0.7071402
-2.2039894 -2.0412031 0.7257846
-2.1961357 -1.8937992 0.6375279
-2.1958251 -1.9704629 0.6781331
-2.1950684 -1.9457149 0.6637755
-2.1996194 -2.0101881 0.7033673
-2.2010334 -2.0212926 0.7110790
-2.1962049 -1.8981371 0.6392483
-2.1972663 -1.9878635 0.6886407
-2.1989439 -2.0045365 0.6995508
-2.1953622 -1.9337554 0.6571688
-2.1985567 -1.9996998 0.6960231
-2.1955058 -1.9431508 0.6617031
-2.1967301 -1.9765563 0.6808744
-2.1981749 -1.9936507 0.6916679
-2.1962085 -1.9670661 0.6751255
-2.1963503 -1.9036129 0.6411408
-2.1959460 -1.9571637 0.6690383
-2.2080704 -2.0587346 0.7379285
-2.2067363 -2.0512100 0.7313149
-2.2054055 -2.0439842 0.7257704
-2.2021108 -2.0236784 0.7111365
-2.1961708 -1.9216235 0.6491415
-2.2015734 -2.0181157 0.7066418
-2.2029657 -1.8386378 0.6125361
-2.1980222 -1.8829239 0.6304356
-2.1963033 -1.9295599 0.6533568
-2.2044859 -2.0374996 0.7205326
-2.1963118 -1.9178035 0.6469412
-2.1967253 -1.9630577 0.6714715
-2.1965873 -1.9126485 0.6443315
-2.1964107 -1.9498240 0.6638711
-2.1985450 -1.8767464 0.6272077
-2.1964977 -1.9534568 0.6658638
-2.1974719 -1.9738008 0.6773452
-2.1993800 -1.9963485 0.6914328
-2.2007416 -2.0080930 0.6988944
-2.2100074 -2.0629839 0.7391122
-2.2026808 -1.8462382 0.6145665
-2.2016829 -1.8541867 0.6176978
-2.1997525 -1.8740282 0.6261087
-2.1975495 -1.9703179 0.6747869
-2.1981309 -1.8931367 0.6342310
-2.2078810 -2.0535344 0.7314577
-2.2032527 -2.0263080 0.7112824
-2.1991230 -1.9913499 0.6877149
-2.1985341 -1.8889103 0.6320282
-2.2004258 -2.0032733 0.6950031
-2.2067912 -2.0466033 0.7256156
-2.1971279 -1.9462401 0.6606438
-2.1982899 -1.8977634 0.6357704
-2.1973056 -1.9376179 0.6559478
-2.1976320 -1.9610322 0.6685112
-2.2048377 -2.0335832 0.7154867
-2.1983295 -1.9029285 0.6378612
-2.2062766 -2.0419902 0.7212334
-2.2033933 -2.0220011 0.7065995
-2.2079574 -2.0497865 0.7265346
-2.1980654 -1.9532390 0.6630725
-2.2044967 -2.0288889 0.7111607
-2.2055708 -1.8343376 0.6083227
-2.2031473 -1.8528723 0.6154323
-2.1989177 -1.9769086 0.6767039
-2.1997078 -1.8878114 0.6299734
-2.1980161 -1.9430104 0.6576286
-2.1984658 -1.9672368 0.6711396
-2.1980009 -1.9253696 0.6480056
-2.1981486 -1.9175686 0.6437367
-2.1980992 -1.9215715 0.6457728
-2.2005228 -1.8803863 0.6263085
-2.1984361 -1.9579828 0.6652816
-2.2006153 -1.9945265 0.6870466
-2.2024054 -2.0111587 0.6979883
-2.1999730 -1.8922968 0.6311449
-2.1985534 -1.9308528 0.6500273
-2.2061164 -2.0362836 0.7152545
-2.1985652 -1.9493721 0.6600258
-2.1990635 -1.9640789 0.6679729
-2.2038238 -2.0193965 0.7029144
-2.2092066 -2.0522067 0.7265699
-2.1996579 -1.9739209 0.6734016
-2.1999807 -1.8980614 0.6332244
-2.2047562 -2.0248220 0.7062543
-2.2053579 -1.8449378 0.6104322
-2.2045381 -1.8515697 0.6131150
-2.1997667 -1.9703803 0.6709050
-2.2058292 -2.0315795 0.7109373
-2.2018197 -1.8786716 0.6242816
-2.2026529 -2.0072082 0.6936587
-2.2033823 -2.0142236 0.6986838
-2.2000837 -1.9026169 0.6347261
-2.2012720 -1.8863928 0.6271861
-2.1995144 -1.9375703 0.6521712
-2.1996938 -1.9465576 0.6566513
-2.2053611 -1.8493067 0.6114269
-2.2041089 -1.8591909 0.6150444
-2.2103608 -2.0545991 0.7266382
-2.2013645 -1.8914570 0.6288093
-2.1998380 -1.9291970 0.6467871
-2.2092112 -2.0481036 0.7214160
-2.2023109 -1.9983963 0.6866327
-2.2044038 -2.0168623 0.6988353
-2.2001837 -1.9526802 0.6592748
-2.2060518 -2.0275069 0.7060352
-2.1999716 -1.9259731 0.6447644
-2.2054708 -2.0224711 0.7023378
-2.2069399 -1.8423180 0.6076751
-2.2005565 -1.9619058 0.6640167
-2.2126303 -2.0630716 0.7322966
-2.2004913 -1.9577728 0.6616324
-2.2003342 -1.9215708 0.6419560
-2.2012189 -1.9780504 0.6730843
-2.2009642 -1.9676916 0.6669670
-2.2017353 -1.8970476 0.6301924
-2.2027610 -1.8844863 0.6244191
-2.2115652 -2.0569746 0.7267216
-2.2102838 -2.0505174 0.7217493
-2.2027840 -1.9934330 0.6817070
-2.2045737 -2.0114989 0.6932401
-2.2015755 -1.9736766 0.6697163
-2.2011496 -1.9500158 0.6561683
-2.2021511 -1.9020573 0.6314350
-2.2058421 -2.0198047 0.6987073
-2.2073277 -2.0301102 0.7058923
-2.2031206 -1.8908172 0.6260439
-2.2014293 -1.9411005 0.6507994
-2.2086717 -2.0380455 0.7110881
-2.2015483 -1.9568748 0.6592908
-2.2113410 -2.0528912 0.7221306
-2.2039948 -2.0017558 0.6858097
-2.2069612 -2.0254898 0.7018101
-2.2027043 -1.9812681 0.6723402
-2.2017652 -1.9336672 0.6457287
-2.2049955 -2.0078695 0.6888863
-2.2062338 -1.8647644 0.6134671
-2.2019837 -1.9300599 0.6433333
-2.2024985 -1.9615987 0.6604416
-2.2126388 -2.0553938 0.7220754
-2.2023597 -1.9265732 0.6409151
-2.2097916 -1.8397030 0.6030902
-2.2030907 -1.9739302 0.6672015
-2.2033293 -1.9876389 0.6747753
-2.2098455 -2.0407911 0.7108107
-2.2062683 -2.0145443 0.6923496
-2.2047486 -1.9992311 0.6824163
-2.2029950 -1.9674303 0.6633178
-2.2038154 -1.9014055 0.6286433
-2.2075564 -2.0229603 0.6980557
-2.2034474 -1.9773355 0.6686566
-2.2084537 -2.0284169 0.7013685
-2.2049955 -1.8894267 0.6228850
-2.2047169 -1.9928528 0.6771347
-2.2057832 -2.0053043 0.6851755
-2.2094829 -2.0338032 0.7047467
-2.2076573 -1.8634930 0.6111345
-2.2033977 -1.9602203 0.6580510
-2.2067518 -2.0132729 0.6899770
-2.2139582 -2.0579782 0.7219611
-2.2097992 -1.8489833 0.6047809
-2.2041030 -1.9651127 0.6599103
-2.2112194 -2.0438713 0.7105409
-2.2120050 -2.0489935 0.7141470
-2.2076283 -2.0173241 0.6920427
-2.2038549 -1.9511433 0.6521311
-2.2089509 -2.0259815 0.6978480
-2.2052689 -1.9001214 0.6262346
-2.2062878 -1.8880266 0.6206288
-2.2099647 -2.0319344 0.7016663
-2.2069515 -2.0079324 0.6849858
-2.2047053 -1.9716511 0.6629364
-2.2054636 -1.9910646 0.6739553
-2.2050578 -1.9816241 0.6682332
-2.2065971 -2.0024815 0.6813267
-2.2111712 -2.0376467 0.7047463
-2.2167164 -2.0676055 0.7275802
-2.2051262 -1.9775247 0.6658068
-2.2063016 -1.9972105 0.6775319
-2.2042894 -1.9342410 0.6414082
-2.2089491 -2.0201635 0.6920039
-2.2087888 -1.8701433 0.6117050
-2.2045388 -1.9262248 0.6368986
-2.2133393 -2.0516693 0.7139398
-2.2046677 -1.9308406 0.6389036
-2.2126320 -2.0465364 0.7100300
-2.2052872 -1.9639865 0.6568990
-2.2105465 -2.0295068 0.6978154
-2.2082569 -2.0109206 0.6848227
-2.2088309 -2.0166518 0.6887982
-2.2149561 -1.8268149 0.5940569
-2.2120761 -1.8460232 0.6009160
-2.2072479 -1.8948798 0.6214894
-2.2060328 -1.9073909 0.6266726
-2.2052065 -1.9546577 0.6511054
-2.2078844 -2.0054146 0.6812394
-2.2162407 -2.0615366 0.7208710
-2.2102739 -2.0228653 0.6917627
-2.2101917 -1.8688396 0.6093968
-2.2072731 -1.9949143 0.6735571
-2.2079969 -2.0007424 0.6769166
-2.2139127 -2.0493691 0.7099847
-2.2174147 -2.0645558 0.7219372
-2.2119609 -2.0325026 0.6976316
-2.2146364 -1.8361260 0.5954893
-2.2076046 -1.9054722 0.6243965
-2.2070549 -1.9859299 0.6665385
-2.2075303 -1.9919433 0.6705474
-2.2126591 -2.0374781 0.7010651
-2.2135440 -2.0430903 0.7045495
-2.2098167 -2.0147068 0.6848607
-2.2094791 -2.0087911 0.6807359
-2.2063038 -1.9395259 0.6401367
-2.2105640 -2.0198774 0.6880946
-2.2115991 -2.0262413 0.6921817
-2.2141369 -1.8444253 0.5978444
-2.2072526 -1.9687253 0.6561008
-2.2153362 -2.0522594 0.7098826
-2.2068212 -1.9360325 0.6377068
-2.2145078 -2.0455094 0.7048877
-2.2091249 -1.9999921 0.6740373
-2.2194240 -2.0688095 0.7226123
-2.2133626 -2.0353286 0.6972815
-2.2072561 -1.9323926 0.6349291
-2.2087775 -1.9946476 0.6702899
-2.2082244 -1.9116042 0.6246486
-2.2142989 -2.0407950 0.7005822
-2.2107214 -2.0122261 0.6810612
-2.2120335 -2.0229380 0.6878653
-2.2128690 -2.0289300 0.6919580
-2.2166370 -2.0547620 0.7098324
-2.2171997 -1.8331447 0.5918616
-2.2138996 -1.8543661 0.5994629
-2.2103011 -2.0052575 0.6759378
-2.2156063 -2.0479727 0.7048741
-2.2115773 -2.0178050 0.6839323
-2.2090003 -1.9904561 0.6658977
-2.2212365 -2.0729997 0.7238721
-2.2082856 -1.9299357 0.6318838
-2.2194507 -2.0652580 0.7172416
-2.2147621 -2.0381556 0.6969308
-2.2118824 -2.0148707 0.6808732
-2.2108502 -2.0032807 0.6732682
-2.2179447 -2.0578533 0.7105377
-2.2133717 -2.0263438 0.6882539
-2.2187483 -1.8309526 0.5897790
-2.2168602 -2.0505427 0.7047637
-2.2160837 -2.0447137 0.7005111
-2.2087302 -1.9439259 0.6380228
-2.2143136 -2.0318359 0.6915335
-2.2104161 -1.9104003 0.6220163
-2.2171078 -1.8425277 0.5933489
-2.2092001 -1.9402099 0.6353279
-2.2213298 -2.0693818 0.7185603
-2.2198766 -1.8288082 0.5880792
-2.2164126 -1.8507465 0.5956596
-2.2100007 -1.9167371 0.6233746
-2.2122116 -2.0102814 0.6761049
-2.2134411 -2.0211458 0.6831168
-2.2145496 -2.0289657 0.6880836
-2.2162681 -2.0411489 0.6964270
-2.2183747 -1.8401839 0.5912833
-2.2181930 -2.0537937 0.7053172
-2.2156384 -2.0347279 0.6914420
-2.2174303 -2.0474062 0.7002850
-2.2098165 -1.9648948 0.6471910
-2.2114580 -1.9940798 0.6645235
-2.2119242 -1.9993473 0.6679793
-2.2135618 -2.0179384 0.6799548
-2.2113560 -1.9903332 0.6614609
-2.2168993 -1.8567074 0.5960682
-2.2130179 -2.0077050 0.6724012
-2.2193904 -2.0563352 0.7055401
-2.2136701 -2.0132752 0.6756110
-2.2149396 -2.0248780 0.6832007
-2.2185525 -2.0500105 0.7004511
-2.2107537 -1.9490045 0.6369067
-2.2178467 -2.0448051 0.6966005
-2.2169169 -2.0374387 0.6911957
-2.2168156 -1.8610249 0.5966166
-2.2109378 -1.9361287 0.6298806
-2.2109379 -1.9400639 0.6320016
-2.2114539 -1.9819748 0.6551076
-2.2124736 -1.9933434 0.6616538
-2.2110766 -1.9452008 0.6342600
-2.2205564 -2.0588771 0.7057586
-2.2125443 -1.9158181 0.6199794
-2.2167661 -2.0341116 0.6881720
-2.2136992 -2.0034990 0.6677018
-2.2210758 -1.8374718 0.5874215
-2.2156890 -1.8765310 0.6018760
-2.2133519 -1.8957444 0.6095341
-2.2154206 -2.0213889 0.6790516
-2.2198062 -2.0525184 0.7003979
-2.2191315 -2.0474180 0.6964504
-2.2182482 -2.0408645 0.6915768
-2.2200494 -1.8484507 0.5905115
-2.2121567 -1.9289704 0.6242844
-2.2124750 -1.9793255 0.6515125
-2.2130776 -1.9904418 0.6582225
-2.2140017 -2.0009788 0.6651387
-2.2155337 -2.0176349 0.6754856
-2.2166481 -2.0280977 0.6824982
-2.2217994 -2.0612863 0.7058000
-2.2209172 -1.8456512 0.5888850
-2.2226958 -1.8353249 0.5853447
-2.2200154 -2.0497558 0.6968672
-2.2149911 -2.0063524 0.6673055
-2.2181795 -2.0369771 0.6877880
-2.2177180 -1.8673470 0.5961776
-2.2171113 -1.8706988 0.5973729
-2.2132945 -1.9220419 0.6202147
-2.2239583 -2.0704703 0.7121177
-2.2210635 -2.0550414 0.7003323
-2.2142462 -1.9973689 0.6614437
-2.2134485 -1.9860699 0.6536501
-2.2229220 -2.0637281 0.7061065
-2.2127284 -1.9529719 0.6351080
-2.2195460 -2.0435402 0.6913674
-2.2167861 -2.0203375 0.6752350
-2.2220639 -1.8438101 0.5870207
-2.2174115 -1.8756302 0.5986739
-2.2130711 -1.9453332 0.6307251
-2.2133822 -1.9676103 0.6430968
-2.2160414 -2.0124574 0.6700151
-2.2173113 -2.0255837 0.6787275
-2.2131373 -1.9493233 0.6328066
-2.2142094 -1.9931778 0.6578955
-2.2222041 -2.0575867 0.7005493
-2.2214133 -2.0524310 0.6966610
-2.2200635 -1.8627069 0.5932817
-2.2149247 -1.9207011 0.6180683
-2.2135905 -1.9371328 0.6252388
-2.2135503 -1.9432239 0.6289018
-2.2139404 -1.9830083 0.6503494
-2.2185323 -2.0316080 0.6815266
-2.2196545 -2.0400980 0.6874844
-2.2158430 -2.0054899 0.6645035
-2.2207440 -2.0462275 0.6914583
-2.2137390 -1.9332272 0.6226282
-2.2153653 -1.9964955 0.6583491
-2.2171951 -1.8894729 0.6024201
-2.2160721 -1.9013800 0.6075713
-2.2180100 -2.0230534 0.6749731
-2.2258501 -2.0739459 0.7111336
-2.2174105 -2.0161589 0.6701265
-2.2233975 -2.0600502 0.7005405
-2.2226228 -2.0550099 0.6968454
-2.2181724 -1.8820589 0.5992913
-2.2145517 -1.9575819 0.6343596
-2.2194299 -1.8752645 0.5957759
-2.2149556 -1.9712561 0.6419901
-2.2150542 -1.9857498 0.6500234
-2.2156314 -1.9907012 0.6529470
-2.2197693 -2.0343200 0.6812746
-2.2213793 -2.0439034 0.6875164
-2.2222186 -2.0490858 0.6910809
-2.2152011 -1.9324085 0.6202867
-2.2149825 -1.9535141 0.6312215
-2.2233376 -1.8514782 0.5865214
-2.2246786 -2.0632071 0.7011883
-2.2172758 -1.9001202 0.6051251
-2.2158753 -1.9277031 0.6181542
-2.2181606 -2.0152859 0.6677153
-2.2186254 -2.0190359 0.6700508
-2.2175639 -2.0090398 0.6635237
-2.2238730 -2.0573888 0.6966127
-2.2196945 -1.8808612 0.5969268
-2.2206017 -1.8735700 0.5936571
-2.2243948 -1.8494088 0.5848599
-2.2167783 -1.9254431 0.6165354
-2.2157502 -1.9379205 0.6218393
-2.2157077 -1.9472383 0.6271057
-2.2161230 -1.9830815 0.6464500
-2.2285790 -2.0801631 0.7128133
-2.2158954 -1.9418373 0.6240244
-2.2260129 -2.0657754 0.7010850
-2.2229545 -2.0468716 0.6870358
-2.2217302 -1.8716977 0.5918261
-2.2197848 -1.8888716 0.5987016
-2.2209930 -2.0326441 0.6767568
-2.2239255 -2.0520812 0.6905678
-2.2170827 -1.9902416 0.6494618
-2.2278687 -2.0743090 0.7070004
-2.2167643 -1.9614143 0.6332162
-2.2300016 -2.0827178 0.7127181
-2.2194839 -1.8952677 0.6001745
-2.2214179 -1.8799834 0.5943194
-2.2186746 -1.9070401 0.6055277
-2.2174515 -1.9313495 0.6170504
-2.2190926 -2.0125183 0.6625507
-2.2225119 -2.0408303 0.6813821
-2.2199588 -2.0185821 0.6665959
-2.2207262 -2.0242142 0.6700936
-2.2271718 -2.0682960 0.7013203
-2.2174026 -1.9361512 0.6187755
-2.2263895 -2.0631984 0.6973787
-2.2219362 -2.0350124 0.6768087
-2.2170548 -1.9583923 0.6298450
-2.2174545 -1.9413095 0.6210410
-2.2252995 -2.0553472 0.6911092
-2.2243257 -2.0495864 0.6867916
-2.2178684 -1.9874079 0.6459777
-2.2293458 -2.0769872 0.7067898
-2.2220334 -1.8856499 0.5949737
-2.2186678 -1.9300893 0.6146239
-2.2193379 -2.0032093 0.6542467
-2.2238460 -2.0435023 0.6811739
-2.2284689 -2.0707542 0.7013187
-2.2200730 -1.9049740 0.6026937
-2.2276349 -2.0658306 0.6975126
-2.2182297 -1.9459911 0.6221337
-2.2264645 -2.0579781 0.6912455
-2.2230891 -1.8791498 0.5917515
-2.2191164 -1.9937290 0.6481752
-2.2221607 -2.0271712 0.6696179
-2.2233333 -2.0385556 0.6770701
-2.2214580 -1.8939323 0.5974530
-2.2256092 -2.0521356 0.6867020
-2.2187073 -1.9397293 0.6183854
-2.2217037 -2.0219641 0.6657415
-2.2185178 -1.9660398 0.6320018
-2.2288295 -2.0683888 0.6977110
-2.2251760 -2.0461782 0.6809641
-2.2275716 -2.0603057 0.6913724
-2.2236252 -1.8846143 0.5925892
-2.2316263 -2.0817159 0.7072258
-2.2205198 -2.0069158 0.6542984
-2.2267761 -2.0546739 0.6869260
-2.2195835 -1.9364070 0.6154783
-2.2244441 -1.8776032 0.5895661
-2.2246919 -2.0414966 0.6769421
-2.2306106 -2.0755093 0.7020414
-2.2221455 -1.8999326 0.5978876
-2.2193182 -1.9632560 0.6284946
-2.2198195 -1.9454391 0.6191841
-2.2208039 -2.0009877 0.6499003
-2.2213924 -2.0113529 0.6560593
-2.2242513 -2.0362683 0.6730944
-2.2237460 -2.0303290 0.6689688
-2.2262046 -2.0486565 0.6812479
-2.2207454 -1.9978904 0.6478482
-2.2303189 -2.0711064 0.6974625
-2.2207202 -1.9935985 0.6447889
-2.2287964 -2.0628042 0.6913323
-2.2280888 -2.0579131 0.6874947
-2.2240471 -1.8906191 0.5933673
-2.2201567 -1.9511049 0.6209543
-2.2318362 -2.0779505 0.7020600
-2.2222610 -2.0138980 0.6562843
-2.2216469 -2.0044814 0.6505078
-2.2337105 -2.0860430 0.7080811
-2.2204360 -1.9700789 0.6306161
-2.2253839 -2.0389821 0.6731731
-2.2261444 -2.0442590 0.6766501
-2.2236088 -1.8984483 0.5956942
-2.2225574 -1.9107266 0.6006013
-2.2203328 -1.9599865 0.6242754
-2.2234344 -2.0211531 0.6604609
-2.2273767 -2.0511052 0.6812501
-2.2300967 -2.0656459 0.6915531
-2.2292463 -2.0605174 0.6876561
-2.2316244 -2.0737209 0.6973170
-2.2248448 -2.0287678 0.6652626
-2.2331571 -2.0810826 0.7027494
-2.2216344 -1.9445946 0.6160325
-2.2228463 -2.0121606 0.6538628
-2.2223857 -2.0014447 0.6472134
-2.2234408 -2.0165271 0.6560783
-2.2256770 -2.0344532 0.6683697
-2.2213515 -1.9674158 0.6270260
-2.2229989 -2.0071212 0.6502817
-2.2274332 -2.0468767 0.6764942
-2.2286690 -2.0542523 0.6819014
-2.2224806 -1.9970351 0.6438849
-2.2269461 -2.0422147 0.6727775
-2.2244195 -1.9048182 0.5964124
-2.2248320 -2.0237945 0.6602753
-2.2218905 -1.9503666 0.6176727
-2.2314516 -2.0682813 0.6913805
-2.2343548 -2.0835493 0.7030343
-2.2304745 -2.0628757 0.6874489
-2.2223088 -1.9739747 0.6293277
-2.2285176 -2.0494315 0.6767060
-2.2243404 -2.0152560 0.6536811
-2.2335475 -2.0780978 0.6981352
-2.2262411 -2.0317173 0.6647958
-2.2242248 -2.0098687 0.6503691
-2.2297737 -2.0568302 0.6820914
-2.2239771 -2.0044240 0.6467263
-2.2353967 -2.0858147 0.7034884
-2.2249179 -2.0194609 0.6556181
-2.2273306 -2.0377510 0.6679302
-2.2327006 -2.0707673 0.6913505
-2.2238952 -2.0010395 0.6440492
-2.2259207 -1.9034938 0.5941721
-2.2227507 -1.9560566 0.6183889
-2.2226218 -1.9652012 0.6230775
-2.2231160 -1.9710440 0.6259785
-2.2347825 -2.0811896 0.6988516
-2.2286163 -2.0451102 0.6720415
-2.2308442 -2.0593836 0.6823023
-2.2233640 -1.9497418 0.6147603
-2.2253047 -2.0123536 0.6502854
-2.2275354 -2.0347100 0.6646288
-2.2240231 -1.9236770 0.6011066
-2.2235006 -1.9354556 0.6066689
-2.2236153 -1.9858463 0.6337663
-2.2242534 -1.9962013 0.6399464
-2.2365436 -2.0880459 0.7037338
-2.2253968 -2.0072596 0.6463531
-2.2303803 -2.0531020 0.6765574
-2.2287857 -2.0406864 0.6674755
-2.2239625 -1.9784012 0.6287258
-2.2240348 -1.9547875 0.6160168
-2.2240587 -1.9823323 0.6308756
-2.2264996 -2.0233251 0.6555765
-2.2360643 -2.0836364 0.6988675
-2.2300554 -2.0485864 0.6723736
-2.2321503 -2.0618140 0.6820243
-2.2256056 -2.0041074 0.6431196
-2.2350937 -2.0763875 0.6922841
-2.2242260 -1.9643855 0.6198763
-2.2247099 -1.9741310 0.6249436
-2.2372239 -2.0860380 0.6991960
-2.2292314 -2.0378638 0.6639821
-2.2268052 -2.0100271 0.6460764
-2.2318495 -2.0560938 0.6763603
-2.2299250 -2.0432574 0.6673509
-2.2253423 -1.9892399 0.6329377
-2.2342898 -2.0707161 0.6873129
-2.2248498 -1.9608031 0.6170863
-2.2248727 -1.9706447 0.6224090
-2.2253392 -1.9855018 0.6306241
-2.2277342 -2.0260377 0.6553105
-2.2260428 -1.9994133 0.6388514
-2.2362384 -2.0787791 0.6923683
-2.2277989 -2.0225846 0.6523464
-2.2257057 -1.9819664 0.6277376
-2.2256833 -1.9407098 0.6054391
-2.2338906 -2.0650604 0.6815757
-2.2271936 -2.0071975 0.6425581
-2.2311037 -2.0464457 0.6679417
-2.2356413 -2.0741709 0.6879706
-2.2258564 -1.9779975 0.6251911
-2.2280735 -2.0133884 0.6464435
-2.2306923 -2.0410284 0.6636579
-2.2373049 -2.0811728 0.6926929
-2.2262206 -1.9373138 0.6030405
-2.2260517 -1.9595549 0.6146622
-2.2260340 -1.9679586 0.6188994
-2.2333005 -2.0589485 0.6759854
-2.2270470 -1.9930581 0.6324819
-2.2276809 -2.0026837 0.6381211
-2.2306393 -1.8913952 0.5817650
-2.2278625 -1.9223799 0.5950630
-2.2274261 -1.9302039 0.5985724
-2.2270158 -1.9886218 0.6295739
-2.2330293 -2.0542426 0.6716749
-2.2352556 -2.0677217 0.6813814
-2.2268091 -1.9754938 0.6219394
-2.2368487 -2.0765700 0.6880293
-2.2270412 -1.9849691 0.6272181
-2.2325258 -2.0495022 0.6677042
-2.2385778 -2.0835658 0.6927514
-2.2271834 -1.9813441 0.6247716
-2.2312949 -2.0382839 0.6597624
-2.2280577 -1.9279389 0.5968724
-2.2289925 -1.9161509 0.5914800
-2.2280739 -1.9994197 0.6349899
-2.2299644 -2.0260948 0.6514340
-2.2322241 -2.0445853 0.6635725
-2.2350682 -2.0633177 0.6767965
-2.2379673 -2.0790373 0.6883246
-2.2341964 -2.0567657 0.6716088
-2.2284368 -1.9963139 0.6321503
-2.2277727 -1.9447369 0.6035920
-2.2276684 -1.9631919 0.6135799
-2.2290880 -2.0067697 0.6382357
-2.2284122 -1.9926181 0.6297853
-2.2398504 -2.0859886 0.6928058
-2.2390649 -2.0814273 0.6886715
-2.2317610 -1.8983723 0.5819792
-2.2285209 -1.9425461 0.6018842
-2.2312855 -2.0292126 0.6511745
-2.2341923 -2.0525819 0.6671203
-2.2363441 -2.0660925 0.6767939
-2.2375412 -2.0733697 0.6822990
-2.2327655 -2.0412691 0.6592617
-2.2408846 -2.0883224 0.6934612
-2.2294567 -2.0024128 0.6344898
-2.2353190 -2.0593734 0.6717731
-2.2335003 -2.0473513 0.6632754
-2.2290485 -1.9847547 0.6235188
-2.2290353 -1.9793688 0.6203017
-2.2287477 -1.9750592 0.6179993
-2.2300969 -1.9271691 0.5936968
-2.2385988 -2.0757739 0.6826390
-2.2403135 -2.0837992 0.6887538
-2.2300420 -1.9995658 0.6313992
-2.2420011 -2.0906050 0.6936551
-2.2376652 -2.0687077 0.6766416
-2.2293528 -1.9490603 0.6030303
-2.2314140 -1.9161621 0.5877359
-2.2291998 -1.9530716 0.6050142
-2.2366022 -2.0625863 0.6723637
-2.2341121 -2.0450231 0.6596665
-2.2305965 -2.0054150 0.6343197
-2.2301400 -1.9958070 0.6286941
-2.2304246 -1.9330723 0.5952960
-2.2348394 -2.0501226 0.6629796
-2.2312834 -1.9213529 0.5897928
-2.2328765 -2.0330148 0.6511801
-2.2397164 -2.0780642 0.6827984
-2.2356598 -1.8756347 0.5694692
-2.2363059 -2.0575257 0.6673878
-2.2416080 -2.0862648 0.6887490
-2.2431481 -2.0929066 0.6938098
-2.2337534 -1.9036089 0.5807019
-2.2391345 -2.0721150 0.6770547
-2.2344919 -1.8957789 0.5773118
-2.2319518 -1.9267199 0.5907674
-2.2308786 -1.9425685 0.5980915
-2.2316200 -2.0088005 0.6346183
-2.2320674 -2.0130497 0.6369451
-2.2334939 -2.0300434 0.6478376
-2.2381169 -2.0655878 0.6721502
-2.2305988 -1.9786975 0.6169622
-2.2309695 -1.9893229 0.6228398
-2.2409057 -2.0804709 0.6828504
-2.2428205 -2.0887063 0.6890103
-2.2319900 -1.9313777 0.5922263
-2.2310845 -1.9838619 0.6192780
-2.2319086 -2.0031985 0.6303540
-2.2444111 -2.0958660 0.6946427
-2.2311193 -1.9472381 0.5996151
-2.2357076 -2.0479186 0.6589184
-2.2345984 -1.9007435 0.5784722
-2.2310624 -1.9527047 0.6019794
-2.2335279 -2.0251928 0.6436579
-2.2344741 -2.0361717 0.6505411
-2.2366959 -2.0535939 0.6623622
-2.2318750 -1.9993140 0.6277548
-2.2317386 -1.9955535 0.6254663
-2.2378646 -2.0605033 0.6668997
-2.2312309 -1.9572021 0.6036536
-2.2334770 -1.9212401 0.5866550
-2.2379680 -1.8753087 0.5671486
-2.2357541 -2.0437007 0.6544925
-2.2394837 -2.0682482 0.6719569
-2.2420934 -2.0828612 0.6829201
-2.2326034 -1.9375012 0.5937022
-2.2440364 -2.0910840 0.6890898
-2.2336368 -2.0162256 0.6362619
-2.2336300 -1.9255456 0.5878682
-2.2379058 -2.0568320 0.6629156
-2.2353305 -2.0332850 0.6467536
-2.2349152 -2.0280630 0.6432549
-2.2324809 -1.9824085 0.6158567
-2.2416726 -2.0772558 0.6771341
-2.2432142 -2.0852937 0.6832254
-2.2329875 -1.9976209 0.6243918
-2.2337264 -1.9311188 0.5896247
-2.2394919 -2.0640828 0.6671402
-2.2326938 -1.9516617 0.5990305
-2.2452707 -2.0941072 0.6898928
-2.2357929 -1.9081287 0.5789789
-2.2336274 -1.9360191 0.5914293
-2.2329870 -1.9876505 0.6180984
-2.2338844 -2.0078288 0.6296510
-2.2383098 -1.8812830 0.5674529
-2.2365405 -1.9003870 0.5755005
-2.2351908 -1.9155835 0.5821389
-2.2330629 -1.9478273 0.5968599
-2.2332132 -1.9932807 0.6211300
-2.2390459 -2.0594408 0.6630809
-2.2337463 -2.0029749 0.6266857
-2.2426489 -2.0795929 0.6775375
-2.2415317 -2.0729594 0.6724436
-2.2443814 -2.0877335 0.6835181
-2.2361825 -2.0309779 0.6431861
-2.2399974 -1.8756311 0.5647521
-2.2332843 -1.9566977 0.6002150
-2.2330168 -1.9619581 0.6027159
-2.2329697 -1.9659068 0.6048030
-2.2383917 -2.0523503 0.6571211
-2.2376318 -2.0471275 0.6535982
-2.2367753 -1.9062255 0.5770184
-2.2396880 -1.8791488 0.5659214
-2.2352316 -2.0202653 0.6360483
-2.2464838 -2.0964786 0.6900077
-2.2368589 -2.0363545 0.6461913
-2.2342341 -2.0006339 0.6239668
-2.2409022 -2.0667536 0.6669371
-2.2351957 -1.9305018 0.5872763
-2.2345564 -1.9416574 0.5922041
-2.2357090 -1.9253876 0.5847260
-2.2365278 -1.9142948 0.5797846
-2.2341060 -1.9505560 0.5964365
-2.2336614 -1.9765905 0.6094778
-2.2376308 -2.0423794 0.6493408
-2.2437704 -2.0819501 0.6776337
-2.2403651 -2.0620776 0.6629083
-2.2456344 -2.0901512 0.6835577
-2.2343342 -1.9866821 0.6150134
-2.2353961 -1.9349251 0.5883982
-2.2396724 -2.0557210 0.6575416
-2.2348747 -1.9469334 0.5937366
-2.2383850 -2.0454273 0.6503579
-2.2345787 -1.9555593 0.5977776
-2.2477312 -2.0988292 0.6901142
-2.2347461 -1.9913345 0.6169871
-2.2419422 -2.0690522 0.6670819
-2.2380676 -2.0391987 0.6461858
-2.2355540 -1.9400833 0.5900229
-2.2376328 -2.0337059 0.6425547
-2.2449265 -2.0844304 0.6778941
-2.2356535 -2.0072432 0.6258806
-2.2394864 -2.0511992 0.6533933
-2.2353188 -1.9973193 0.6197708
-2.2347018 -1.9609668 0.5997362
-2.2378523 -1.9130081 0.5774222
-2.2364231 -2.0171424 0.6312620
-2.2360944 -2.0115018 0.6277973
-2.2470668 -2.0932630 0.6842865
-2.2418039 -2.0647859 0.6626700
-2.2370992 -2.0235502 0.6349383
-2.2348389 -1.9698574 0.6034797
-2.2407255 -2.0580860 0.6576142
-2.2430791 -2.0714480 0.6671370
-2.2353309 -1.9802892 0.6091056
-2.2361439 -1.9461840 0.5914237
-2.2380678 -1.9179502 0.5786578
-2.2359710 -1.9501895 0.5934027
-2.2379981 -2.0292433 0.6380361
-2.2358692 -1.9542996 0.5953008
-2.2363817 -2.0044427 0.6223834
-2.2367726 -1.9387252 0.5876138
-2.2394772 -2.0420315 0.6458198
-2.2481719 -2.0956352 0.6846397
-2.2462786 -2.0868757 0.6776456
-2.2360842 -1.9902938 0.6139795
-2.2390711 -1.9114875 0.5752603
-2.2417996 -1.8849432 0.5640977
-2.2373092 -1.9344879 0.5853846
-2.2418081 -2.0606148 0.6578572
-2.2392662 -2.0374919 0.6425794
-2.2363970 -1.9956391 0.6165097
-2.2357889 -1.9682963 0.6012884
-2.2402413 -2.0485116 0.6494341
-2.2452545 -2.0799331 0.6718002
-2.2376252 -2.0206264 0.6315142
-2.2377629 -1.9302726 0.5831853
-2.2389152 -2.0317708 0.6382857
-2.2410897 -2.0541134 0.6526304
-2.2432739 -2.0675372 0.6623922
-2.2364040 -1.9602509 0.5969229
-2.2376580 -2.0157036 0.6278217
-2.2444669 -2.0743150 0.6670549
-2.2387047 -2.0268144 0.6345723
-2.2474885 -2.0899743 0.6786233
-2.2372799 -1.9447079 0.5891135
-2.2431395 -1.8815424 0.5620637
-2.2366845 -1.9835896 0.6087402
-2.2492938 -2.0979595 0.6847790
-2.2366081 -1.9647425 0.5985345
-2.2376873 -2.0111964 0.6245512
-2.2407450 -2.0456969 0.6462925
-2.2373155 -2.0017521 0.6188168
-2.2430248 -2.0632198 0.6580284
-2.2367020 -1.9744168 0.6028462
-2.2379773 -2.0080387 0.6217453
-2.2378014 -1.9498340 0.5903444
-2.2370826 -1.9800842 0.6058286
-2.2468321 -2.0840641 0.6728478
-2.2421726 -2.0565013 0.6526697
-2.2415431 -2.0512193 0.6491870
-2.2444522 -2.0699972 0.6623862
-2.2400239 -2.0343497 0.6381338
-2.2388795 -2.0234469 0.6311448
-2.2375738 -1.9939558 0.6132719
-2.2504770 -2.1003099 0.6851413
-2.2376028 -1.9588846 0.5945235
-2.2487496 -2.0923690 0.6786842
-2.2389563 -2.0185402 0.6274294
-2.2380570 -1.9991544 0.6155446
-2.2418081 -2.0481564 0.6462533
-2.2401106 -2.0298026 0.6340560
-2.2375527 -1.9727823 0.6006368
-2.2432447 -2.0591747 0.6531106
-2.2478677 -2.0864632 0.6731934
-2.2443709 -2.0658233 0.6578847
-2.2427047 -2.0538986 0.6493144
-2.2417118 -2.0430472 0.6423065
-2.2382925 -1.9640873 0.5957330
-2.2498855 -2.0948332 0.6789546
-2.2389313 -2.0053899 0.6181401
-2.2382631 -1.9686631 0.5976991
-2.2401829 -2.0264304 0.6310232
-2.2398368 -1.9351963 0.5815859
-2.2395340 -1.9392011 0.5835073
-2.2455126 -1.8747267 0.5560398
-2.2436179 -1.8919014 0.5629534
-2.2413088 -1.9163050 0.5733095
-2.2398401 -2.0211390 0.6276081
-2.2470315 -2.0802133 0.6677353
-2.2517448 -2.1027220 0.6851886
-2.2413571 -2.0371233 0.6378158
-2.2463674 -2.0753208 0.6639060
-2.2490608 -2.0888867 0.6732287
-2.2396051 -2.0119344 0.6212322
-2.2391545 -1.9982178 0.6128274
-2.2397037 -1.9490829 0.5870314
-2.2429206 -2.0458756 0.6422953
-2.2445876 -2.0616217 0.6527832
-2.2510769 -2.0972041 0.6790430
-2.2457786 -2.0683763 0.6574779
-2.2396801 -2.0025572 0.6146814
-2.2392966 -1.9838795 0.6042680
-2.2441925 -2.0567551 0.6489300
-2.2396557 -1.9629802 0.5932079
-2.2454896 -1.8879468 0.5598257
-2.2439390 -1.8985558 0.5637140
-2.2437960 -2.0516794 0.6452946
-2.2483813 -2.0828841 0.6675364
-2.2475913 -2.0778282 0.6638583
-2.2417138 -2.0294951 0.6304506
-2.2503343 -2.0913222 0.6732511
-2.2405308 -2.0084978 0.6171170
-2.2457866 -2.0642726 0.6529184
-2.2397316 -1.9769325 0.5992074
-2.2413375 -2.0185163 0.6227600
-2.2522979 -2.0995577 0.6791722
-2.2470729 -2.0710722 0.6575615
-2.2411318 -2.0153889 0.6207135
-2.2400734 -1.9729409 0.5967476
-2.2403113 -1.9676968 0.5942172
-2.2442813 -2.0484324 0.6418260
-2.2449384 -2.0542073 0.6452021
-2.2457113 -2.0598443 0.6486772
-2.2454631 -1.8972343 0.5614922
-2.2488761 -2.0804580 0.6636984
-2.2514872 -2.0938000 0.6735135
-2.2409504 -2.0018959 0.6117288
-2.2412247 -2.0065811 0.6144374
-2.2534451 -2.1018376 0.6793475
-2.2423603 -2.0218328 0.6231592
-2.2419297 -1.9448272 0.5815049
-2.2471568 -2.0675841 0.6534043
-2.2417422 -2.0123430 0.6174377
-2.2462672 -1.8949669 0.5597851
-2.2432794 -2.0326873 0.6297749
-2.2423864 -1.9405316 0.5793139
-2.2411288 -1.9885218 0.6034914
-2.2508729 -2.0879707 0.6676661
-2.2423435 -2.0182281 0.6203339
-2.2461093 -2.0569191 0.6452865
-2.2526311 -2.0962391 0.6738080
-2.2483217 -1.8808227 0.5536289
-2.2544608 -2.1041881 0.6799541
-2.2419124 -1.9668950 0.5915392
-2.2458997 -1.9038710 0.5623362
-2.2420407 -1.9546505 0.5850829
-2.2417660 -1.9990764 0.6082704
-2.2444409 -2.0395044 0.6331178
-2.2504048 -2.0834440 0.6634846
-2.2471592 -2.0631477 0.6488314
-2.2420141 -1.9721722 0.5935475
-2.2420503 -1.9769714 0.5954510
-2.2539446 -2.0992851 0.6745748
-2.2427750 -2.0098863 0.6136582
-2.2419811 -1.9819734 0.5977078
-2.2431395 -2.0153437 0.6169015
-2.2557241 -2.1065818 0.6800172
-2.2475087 -2.0604586 0.6455451
-2.2429250 -2.0062208 0.6108762
-2.2484061 -2.0658849 0.6488922
-2.2517338 -2.0860442 0.6633499
-2.2456873 -2.0426576 0.6328176
-2.2530138 -2.0926412 0.6681877
-2.2551131 -2.1016060 0.6747105
-2.2430365 -1.9925450 0.6021304
-2.2478829 -1.9022390 0.5588331
-2.2457786 -2.0377883 0.6286603
-2.2511491 -2.0800094 0.6576877
-2.2494690 -2.0684806 0.6490735
-2.2445419 -2.0186427 0.6165122
-2.2448064 -2.0246190 0.6201666
-2.2438773 -1.9713397 0.5904616
-2.2438556 -2.0028382 0.6067191
-2.2447105 -1.9460549 0.5773968
-2.2530788 -2.0886448 0.6632154
-2.2439796 -1.9761461 0.5923157
-2.2483375 -2.0564689 0.6402610
-2.2445761 -1.9502649 0.5791882
-2.2491783 -2.0635872 0.6449273
-2.2521283 -2.0824202 0.6580277
-2.2439602 -1.9814939 0.5943014
-2.2441484 -1.9859513 0.5964339
-2.2554298 -2.0980372 0.6693119
-2.2513561 -1.8834814 0.5499080
-2.2448125 -2.0099258 0.6097658
-2.2510600 -1.8870366 0.5511562
-2.2448657 -1.9556128 0.5805410
-2.2506507 -2.0709927 0.6490089
-2.2572450 -2.1061703 0.6753553
-2.2491963 -2.0589412 0.6405550
-2.2543484 -2.0912922 0.6633221
-2.2533046 -2.0848308 0.6580704
-2.2463790 -1.9401679 0.5724243
-2.2450561 -2.0011487 0.6034908
-2.2457235 -2.0161787 0.6123539
-2.2450433 -1.9923763 0.5983836
-2.2465041 -2.0280737 0.6192397
-2.2583147 -2.1084787 0.6757660
-2.2565935 -2.1004519 0.6693834
-2.2452342 -1.9965646 0.6003428
-2.2508161 -2.0664601 0.6442038
-2.2502891 -2.0614060 0.6405237
-2.2458003 -2.0073573 0.6060905
-2.2483002 -1.9220909 0.5634630
-2.2474906 -1.9300074 0.5667237
-2.2477130 -2.0379653 0.6246424
-2.2481130 -2.0432605 0.6280703
-2.2466607 -2.0224633 0.6148850
-2.2544827 -2.0873683 0.6582860
-2.2458274 -1.9851829 0.5932401
-2.2559032 -2.0945261 0.6636213
-2.2460275 -1.9799773 0.5906632
-2.2576930 -2.1028517 0.6697160
-2.2465744 -1.9552060 0.5774803
-2.2504160 -1.9079034 0.5567380
-2.2461697 -2.0038845 0.6031537
-2.2466395 -2.0135675 0.6087069
-2.2468472 -1.9507654 0.5753919
-2.2514638 -2.0641609 0.6405686
-2.2522474 -2.0695349 0.6439590
-2.2476341 -2.0251133 0.6148832
-2.2493548 -2.0462195 0.6279522
-2.2474845 -2.0204666 0.6119209
-2.2472840 -1.9608148 0.5794266
-2.2570228 -2.0969923 0.6638997
-2.2556680 -2.0897984 0.6583119
-2.2588245 -2.1051811 0.6698463
-2.2491506 -2.0409505 0.6241358
-2.2469893 -2.0010366 0.5997219
-2.2469370 -1.9971625 0.5975246
-2.2537871 -1.8894198 0.5475740
-2.2486457 -1.9409124 0.5690872
-2.2482839 -1.9454953 0.5710138
-2.2539672 -2.0778966 0.6484385
-2.2550204 -2.0844610 0.6533082
-2.2474010 -2.0067374 0.6027596
-2.2477146 -2.0110690 0.6049800
-2.2488561 -2.0321839 0.6177698
-2.2581130 -2.0993647 0.6642620
-2.2599038 -2.1074783 0.6702702
-2.2488499 -2.0272692 0.6140378
-2.2477098 -1.9845778 0.5898720
-2.2536863 -2.0723982 0.6435728
-2.2513364 -2.0550430 0.6316521
-2.2569769 -2.0923882 0.6582057
-2.2504185 -2.0446000 0.6246396
-2.2509701 -2.0499901 0.6280072
-2.2530542 -2.0670049 0.6398681
-2.2498354 -1.9341915 0.5648064
-2.2478291 -1.9890079 0.5915910
-2.2591054 -2.1016937 0.6646671
-2.2551069 -2.0803471 0.6484392
-2.2563462 -2.0870642 0.6531719
-2.2486815 -1.9600207 0.5760922
-2.2492439 -2.0240778 0.6108759
-2.2610050 -2.1097575 0.6704757
-2.2491266 -1.9550113 0.5733905
-2.2487098 -2.0045519 0.5987727
-2.2583704 -2.0955761 0.6588147
-2.2561491 -2.0828097 0.6487357
-2.2512294 -1.9287392 0.5606068
-2.2504000 -1.9405892 0.5659706
-2.2500899 -1.9445877 0.5679034
-2.2509510 -2.0408224 0.6203951
-2.2550709 -2.0758435 0.6439321
-2.2491637 -2.0102928 0.6017445
-2.2527705 -2.0579241 0.6312585
-2.2518298 -2.0474036 0.6243038
-2.2620846 -2.1120708 0.6708821
-2.2603307 -2.1039940 0.6645675
-2.2495580 -2.0152876 0.6042063
-2.2575681 -2.0894999 0.6531930
-2.2490779 -2.0010585 0.5958514
-2.2510171 -2.0361400 0.6164486
-2.2526711 -2.0531155 0.6273898
-2.2496410 -1.9623049 0.5756686
-2.2520817 -1.9264868 0.5589745
-2.2499572 -2.0210527 0.6071603
-2.2508399 -2.0310290 0.6128724
-2.2493289 -1.9884250 0.5885827
-2.2572143 -2.0852589 0.6490409
-2.2613911 -2.1063221 0.6649473
-2.2596977 -2.0981238 0.6587315
-2.2585522 -2.0918124 0.6536227
-2.2569332 -1.8897724 0.5432169
-2.2520444 -1.9340320 0.5611471
-2.2515671 -1.9393343 0.5635200
-2.2498011 -1.9943668 0.5906356
-2.2541216 -2.0607731 0.6312314
-2.2548800 -2.0659181 0.6348294
-2.2565086 -2.0788890 0.6436964
-2.2524470 -2.0444884 0.6205401
-2.2531484 -2.0499253 0.6238665
-2.2504498 -2.0080337 0.5978589
-2.2608407 -2.1005764 0.6590205
-2.2518324 -1.9442663 0.5647799
-2.2508066 -1.9601019 0.5721544
-2.2541077 -2.0559438 0.6270330
-2.2584494 -2.0877449 0.6490099
-2.2508325 -2.0145904 0.6012840
-2.2596515 -2.0942411 0.6539395
-2.2511793 -2.0189648 0.6034945
-2.2626182 -2.1087103 0.6650400
-2.2513940 -2.0244555 0.6066769
-2.2527764 -2.0402391 0.6161965
-2.2575405 -2.0812171 0.6438056
-2.2509550 -2.0047497 0.5947606
-2.2518866 -1.9499435 0.5664279
-2.2508960 -2.0010351 0.5924069
-2.2522187 -2.0303592 0.6095854
-2.2562499 -2.0693409 0.6351939
-2.2571609 -2.0763873 0.6399242
-2.2525460 -2.0341321 0.6118902
-2.2537706 -2.0474085 0.6204533
-2.2619279 -2.1028601 0.6591909
-2.2545968 -2.0529537 0.6236944
-2.2636912 -2.1110476 0.6654299
-2.2608880 -2.0966751 0.6539620
-2.2516998 -1.9676152 0.5743359
-2.2539616 -1.9311299 0.5570399
-2.2515666 -1.9706070 0.5753235
-2.2511626 -1.9791254 0.5793432
-2.2553772 -2.0586417 0.6267859
-2.2598020 -2.0903337 0.6488834
-2.2534431 -1.9377500 0.5598977
-2.2532918 -2.0372964 0.6128025
-2.2588031 -2.0837751 0.6437072
-2.2647258 -2.1133385 0.6658607
-2.2629398 -2.1052253 0.6595855
-2.2529862 -2.0277317 0.6059285
-2.2518916 -1.9984019 0.5888054
-2.2527735 -2.0224522 0.6025342
-2.2584458 -2.0790837 0.6396920
-2.2550548 -2.0500791 0.6202355
-2.2524915 -2.0088064 0.5945071
-2.2545581 -2.0433709 0.6152131
-2.2528870 -2.0185305 0.5999770
-2.2622067 -2.0992242 0.6538766
-2.2640068 -2.1075833 0.6599606
-2.2600375 -2.0864441 0.6438114
-2.2544191 -2.0399502 0.6125783
-2.2541378 -1.9443062 0.5609499
-2.2524954 -1.9778422 0.5769945
-2.2526938 -2.0046382 0.5913859
-2.2659651 -2.1163263 0.6666967
-2.2562974 -2.0558883 0.6228993
-2.2569997 -2.0617282 0.6261987
-2.2597443 -1.8964471 0.5402878
-2.2547959 -1.9421022 0.5592074
-2.2581133 -2.0695570 0.6311500
-2.2597391 -2.0817779 0.6394657
-2.2563663 -2.0528077 0.6199652
-2.2651237 -2.1099893 0.6602860
-2.2634913 -2.1017557 0.6538100
-2.2549578 -2.0370085 0.6091914
-2.2546131 -2.0309875 0.6052018
-2.2559097 -2.0464267 0.6149989
-2.2612269 -2.0888852 0.6438225
-2.2535766 -1.9720932 0.5725389
-2.2613042 -1.8868824 0.5353730
-2.2606195 -1.8941652 0.5386496
-2.2539515 -1.9659781 0.5689065
-2.2538068 -1.9751372 0.5735946
-2.2536215 -1.9837712 0.5782443
-2.2625865 -2.0956456 0.6485087
-2.2557954 -2.0428825 0.6121192
-2.2541556 -2.0122156 0.5936171
-2.2578219 -2.0596850 0.6229249
-2.2647122 -2.1049010 0.6547649
-2.2663127 -2.1123543 0.6603779
-2.2610046 -2.0843807 0.6393257
-2.2550544 -1.9558283 0.5632065
-2.2540576 -1.9984797 0.5848962
-2.2544319 -2.0089310 0.5909399
-2.2585987 -2.0655869 0.6261710
-2.2636549 -2.0986061 0.6496382
-2.2548077 -2.0226933 0.5984515
-2.2623885 -2.0914299 0.6440364
-2.2578573 -2.0557226 0.6195337
-2.2573853 -2.0494128 0.6145017
-2.2560619 -2.0347267 0.6052406
-2.2550126 -1.9647631 0.5663913
-2.2547540 -1.9909456 0.5800313
-2.2547759 -2.0054474 0.5880056
-2.2657493 -2.1072726 0.6551321
-2.2548803 -1.9824184 0.5751872
-2.2567120 -2.0404525 0.6083121
-2.2571638 -2.0460872 0.6117808
-2.2674810 -2.1146805 0.6605078
-2.2647605 -2.1010628 0.6499281
-2.2637261 -2.0946598 0.6446187
-2.2566071 -1.9500884 0.5588139
-2.2580269 -1.9308423 0.5501110
-2.2563156 -1.9545608 0.5608084
-2.2605227 -2.0734792 0.6294860
-2.2626678 -2.0881982 0.6396541
-2.2614849 -2.0805357 0.6342117
-2.2594615 -2.0631174 0.6223811
-2.2667872 -2.1096299 0.6555079
-2.2593893 -2.0587349 0.6190201
-2.2568726 -2.0321104 0.6015764
-2.2687647 -2.1176717 0.6613368
-2.2560056 -1.9712187 0.5676453
-2.2573830 -1.9476462 0.5566855
-2.2558750 -1.9763706 0.5704470
-2.2660092 -2.1035723 0.6498807
-2.2589158 -2.0531447 0.6145794
-2.2562499 -2.0122692 0.5897180
-2.2565537 -2.0268208 0.5977674
-2.2649327 -2.0972139 0.6448189
-2.2575635 -2.0378585 0.6046008
-2.2638547 -2.0906526 0.6396525
-2.2627238 -2.0837739 0.6347723
-2.2679788 -2.1119778 0.6556145
-2.2565354 -2.0090302 0.5869974
-2.2582476 -1.9440091 0.5540519
-2.2563764 -1.9945778 0.5789516
-2.2562722 -2.0032089 0.5836708
-2.2588166 -2.0493825 0.6110079
-2.2570409 -1.9608297 0.5616198
-2.2699251 -2.1200653 0.6616627
-2.2607739 -2.0626308 0.6192975
-2.2568203 -1.9868871 0.5741136
-2.2672651 -2.1060922 0.6498254
-2.2644370 -1.8935124 0.5326642
-2.2632164 -1.9008579 0.5355699
-2.2627776 -1.9041428 0.5364860
-2.2593929 -1.9377721 0.5504877
-2.2569047 -1.9826220 0.5718565
-2.2569279 -1.9910181 0.5761242
-2.2612193 -2.0665556 0.6214717
-2.2661698 -2.0996819 0.6448088
-2.2691865 -2.1143513 0.6556987
-2.2650835 -2.0931581 0.6396057
-2.2640365 -2.0866192 0.6347117
-2.2581706 -2.0301713 0.5973470
-2.2605135 -2.0562851 0.6139462
-2.2586771 -1.9546360 0.5570483
-2.2586741 -2.0353032 0.6005253
-2.2577623 -1.9703893 0.5644464
-2.2577227 -2.0156783 0.5888225
-2.2592838 -2.0411857 0.6038145
-2.2584797 -1.9597112 0.5591325
-2.2684493 -2.1086289 0.6500349
-2.2603796 -1.9361461 0.5483420
-2.2605223 -2.0533028 0.6109252
-2.2579312 -1.9761286 0.5666006
-2.2668617 -1.8816733 0.5261046
-2.2657409 -1.8916007 0.5302116
-2.2582729 -2.0126212 0.5859778
-2.2600671 -2.0464406 0.6060510
-2.2674836 -2.1022355 0.6447181
-2.2662592 -2.0957860 0.6397445
-2.2703822 -2.1167048 0.6558031
-2.2593967 -1.9525239 0.5551452
-2.2587023 -2.0270673 0.5936953
-2.2586727 -1.9687283 0.5623271
-2.2625736 -2.0661743 0.6182913
-2.2699274 -1.8693716 0.5215018
-2.2592925 -1.9651195 0.5601086
-2.2635609 -2.0753401 0.6239643
-2.2656842 -2.0896328 0.6341908
-2.2585617 -1.9954206 0.5755260
-2.2602765 -1.9489885 0.5524897
-2.2621059 -2.0593700 0.6133612
-2.2696848 -2.1111187 0.6500295
-2.2715097 -2.1190733 0.6561571
-2.2587863 -1.9865226 0.5705870
-2.2685808 -2.1047441 0.6449624
-2.2602108 -2.0385090 0.5998333
-2.2600627 -2.0336938 0.5963796
-2.2676071 -2.0983822 0.6396123
-2.2609930 -2.0446047 0.6029367
-2.2602787 -1.9587246 0.5560914
-2.2622023 -2.0562306 0.6101403
-2.2707693 -2.1135134 0.6503475
-2.2619122 -1.9434509 0.5483949
-2.2624940 -1.9355879 0.5449772
-2.2658907 -2.0853637 0.6291631
-2.2606603 -1.9638930 0.5577068
-2.2727830 -2.1214747 0.6562404
-2.2697773 -2.1072312 0.6449373
-2.2654635 -2.0807857 0.6253590
-2.2601449 -1.9799628 0.5649930
-2.2606382 -2.0305738 0.5927750
-2.2651256 -1.9104039 0.5337433
-2.2601895 -1.9772168 0.5637137
-2.2636061 -2.0623470 0.6128775
-2.2675921 -2.0941636 0.6348566
-2.2689118 -2.1009192 0.6395362
-2.2633791 -1.9319426 0.5423588
-2.2607697 -2.0256169 0.5891221
-2.2719613 -2.1158601 0.6504541
-2.2634469 -2.0590662 0.6101193
-2.2668563 -2.0877577 0.6295293
-2.2627946 -1.9414749 0.5464814
-2.2647039 -2.0699782 0.6170774
-2.2617479 -1.9566780 0.5532618
-2.2739305 -2.1239166 0.6565245
-2.2604280 -1.9990416 0.5740462
-2.2609646 -1.9739880 0.5610588
-2.2624859 -2.0488508 0.6025245
-2.2710875 -2.1097552 0.6448744
-2.2665799 -1.9078458 0.5315092
-2.2627161 -1.9487489 0.5489273
-2.2623933 -1.9533202 0.5508925
-2.2609448 -1.9867915 0.5670265
-2.2607160 -1.9954446 0.5716605
-2.2607059 -2.0038417 0.5758978
-2.2619904 -2.0378437 0.5957120
-2.2666182 -2.0833178 0.6252773
-2.2687904 -2.0966818 0.6347999
-2.2621526 -1.9628678 0.5551438
-2.2684999 -1.8977941 0.5277702
-2.2648928 -2.0657747 0.6132283
-2.2732261 -2.1188240 0.6513023
-2.2702046 -2.1034589 0.6394587
-2.2621206 -2.0338305 0.5924238
-2.2680817 -2.0904536 0.6296135
-2.2700037 -1.8882984 0.5234089
-2.2662023 -2.0785942 0.6209650
-2.2619003 -2.0284261 0.5887282
-2.2647048 -2.0617477 0.6098923
-2.2641365 -1.9402060 0.5441095
-2.2617686 -2.0115020 0.5784218
-2.2743024 -2.1211365 0.6517106
-2.2627165 -1.9684248 0.5565559
-2.2619161 -1.9814297 0.5625320
-2.2658584 -2.0684233 0.6133650
-2.2625607 -1.9725461 0.5584274
-2.2646166 -2.0572556 0.6057172
-2.2714029 -2.1067045 0.6403249
-2.2701581 -2.0994511 0.6347910
-2.2679177 -2.0859844 0.6250752
-2.2639394 -2.0521041 0.6021331
-2.2665378 -2.0742281 0.6167019
-2.2622486 -1.9838887 0.5632582
-2.2634757 -1.9614500 0.5524498
-2.2623849 -2.0074041 0.5748953
-2.2695584 -2.0932655 0.6292684
-2.2737212 -1.8730771 0.5165140
-2.2714103 -1.8863718 0.5210114
-2.2657095 -1.9339413 0.5396095
-2.2655239 -1.9372156 0.5411074
-2.2645683 -1.9491002 0.5463886
-2.2676422 -2.0813689 0.6206672
-2.2660191 -2.0644616 0.6096362
-2.2624483 -1.9992285 0.5704606
-2.2737272 -2.1155463 0.6456284
-2.2631776 -2.0320306 0.5888633
-2.2635699 -2.0373448 0.5922656
-2.2667681 -2.0709616 0.6136013
-2.2755115 -2.1235138 0.6518211
-2.2628555 -1.9912576 0.5659467
-2.2652139 -1.9463737 0.5445132
-2.2726051 -2.1091522 0.6403360
-2.2633631 -1.9785819 0.5593333
-2.2678746 -1.9165013 0.5312878
-2.2631730 -2.0183272 0.5801089
-2.2634663 -2.0288087 0.5861110
-2.2715521 -2.1021042 0.6346050
-2.2641081 -1.9673472 0.5540075
-2.2693110 -2.0887309 0.6248015
-2.2634650 -2.0146890 0.5773090
-2.2689513 -2.0841881 0.6206464
-2.2673214 -2.0680883 0.6101598
-2.2749824 -2.1179928 0.6456402
-2.2689087 -1.9135275 0.5292665
-2.2636169 -1.9879690 0.5629005
-2.2647242 -2.0402803 0.5921784
-2.2737387 -2.1116378 0.6406001
-2.2767598 -2.1259170 0.6518780
-2.2662041 -1.9445420 0.5424902
-2.2665847 -2.0612192 0.6052665
-2.2683938 -2.0774449 0.6156575
-2.2712095 -2.0969394 0.6294191
-2.2645922 -2.0353174 0.5884800
-2.2639056 -1.9851625 0.5609709
-2.2645177 -1.9772650 0.5569573
-2.2639187 -2.0115680 0.5745199
-2.2706257 -2.0915409 0.6247677
-2.2729123 -2.1054101 0.6351191
-2.2684386 -2.0754401 0.6139176
-2.2646987 -2.0316342 0.5857213
-2.2640750 -2.0076041 0.5720048
-2.2711336 -1.9045335 0.5246592
-2.2761471 -2.1203455 0.6457694
-2.2749630 -2.1141735 0.6408107
-2.2664317 -2.0524044 0.5976940
-2.2703379 -2.0869428 0.6203623
-2.2663749 -1.9576826 0.5465280
-2.2647829 -2.0180243 0.5768994
-2.2648809 -2.0219276 0.5790736
-2.2720161 -1.9016529 0.5231175
-2.2647533 -1.9952670 0.5645667
-2.2687603 -2.0710317 0.6096948
-2.2742208 -2.1079874 0.6350076
-2.2699754 -2.0806182 0.6149806
-2.2719549 -2.0942885 0.6244930
-2.2738009 -1.8926777 0.5189082
-2.2650800 -2.0066750 0.5696908
-2.2679094 -2.0600989 0.6015093
-2.2684582 -2.0645714 0.6044501
-2.2732560 -2.1015848 0.6299795
-2.2654098 -1.9917596 0.5617136
-2.2663692 -2.0388463 0.5875136
-2.2677263 -1.9518691 0.5426061
-2.2660731 -2.0346579 0.5851624
-2.2762964 -2.1167459 0.6407027
-2.2759194 -1.8824182 0.5142990
-2.2715432 -1.9135334 0.5256796
-2.2703938 -1.9214954 0.5287018
-2.2690413 -1.9399296 0.5369614
-2.2658410 -2.0207723 0.5765311
-2.2677963 -2.0560721 0.5978200
-2.2657416 -2.0149301 0.5732592
-2.2717355 -2.0897019 0.6200764
-2.2781749 -2.1247904 0.6465311
-2.2742468 -2.1039589 0.6303543
-2.2754296 -2.1105495 0.6352008
-2.2658957 -2.0114044 0.5708040
-2.2684986 -1.9497340 0.5408995
-2.2734069 -2.0976260 0.6249687
-2.2713060 -1.9192057 0.5270721
-2.2664529 -1.9824779 0.5551604
-2.2667312 -2.0301509 0.5807736
-2.2703589 -2.0740378 0.6088267
-2.2714109 -2.0835477 0.6145317
-2.2775967 -2.1192376 0.6406497
-2.2792631 -2.1271117 0.6469326
-2.2765677 -2.1130488 0.6354517
-2.2697117 -2.0641250 0.6013366
-2.2667450 -1.9994923 0.5629914
-2.2731178 -2.0930576 0.6205321
-2.2755409 -2.1065525 0.6302264
-2.2675864 -2.0379577 0.5843805
-2.2671821 -1.9957599 0.5603063
-2.2747367 -2.1002960 0.6247693
-2.2804946 -2.1294764 0.6469981
-2.2788234 -2.1216819 0.6406643
-2.2675739 -2.0250999 0.5760493
-2.2684261 -2.0425253 0.5860429
-2.2674427 -2.0185147 0.5722424
-2.2673727 -2.0108534 0.5677693
-2.2777492 -2.1154425 0.6355120
-2.2718838 -2.0774614 0.6082821
-2.2676320 -2.0150072 0.5697373
-2.2743684 -2.0957754 0.6205834
-2.2748103 -1.9082729 0.5202385
-2.2736128 -1.9162407 0.5232263
-2.2684246 -2.0337521 0.5797278
-2.2768979 -2.1091683 0.6300766
-2.2759086 -2.1028217 0.6250023
-2.2799482 -2.1239573 0.6408646
-2.2686373 -1.9889891 0.5544491
-2.2714461 -2.0675408 0.6000947
-2.2740506 -2.0891788 0.6141611
-2.2789338 -2.1178612 0.6355517
-2.2693265 -2.0414406 0.5834559
-2.2808121 -2.1261186 0.6416930
-2.2737180 -2.0862976 0.6120060
-2.2757384 -2.0984932 0.6203513
-2.2787134 -1.8890923 0.5113575
-2.2731725 -1.9281713 0.5257491
-2.2697699 -1.9697029 0.5439887
-2.2689403 -2.0044551 0.5615572
-2.2691112 -2.0228492 0.5717390
-2.2770657 -2.1052825 0.6249985
-2.2782341 -2.1118040 0.6299097
-2.2691474 -2.0003770 0.5591563
-2.2737263 -2.0817619 0.6078587
-2.2801690 -2.1203448 0.6355322
-2.2693925 -2.0153814 0.5667384
-2.2743033 -1.9251866 0.5237960
-2.2696116 -2.0198153 0.5688697
-2.2698717 -2.0295732 0.5743126
-2.2794192 -2.1143764 0.6300797
-2.2751542 -2.0890616 0.6117140
-2.2781876 -2.1076522 0.6250797
-2.2771022 -2.1011742 0.6201267
-2.2828731 -2.1305706 0.6424401
-2.2701081 -1.9933785 0.5538153
-2.2710798 -2.0457325 0.5830185
-2.2712606 -2.0496057 0.5852327
-2.2732238 -2.0715461 0.5990249
-2.2764576 -2.0963146 0.6162678
-2.2814251 -2.1228030 0.6355366
-2.2710652 -1.9746791 0.5432577
-2.2806626 -2.1175177 0.6307504
-2.2793703 -2.1102325 0.6252605
-2.2763468 -2.0917766 0.6117883
-2.2842093 -2.1336802 0.6431539
-2.2756022 -2.0853526 0.6068117
-2.2775598 -2.0988779 0.6164723
-2.2784160 -2.1037341 0.6200281
-2.2825894 -2.1252111 0.6358599
-2.2714357 -1.9835133 0.5466963
-2.2711930 -1.9921608 0.5513294
-2.2710677 -2.0045411 0.5576244
-2.2716280 -2.0365973 0.5754477
-2.2731636 -2.0619015 0.5906083
-2.2817061 -2.1199189 0.6310924
-2.2715364 -2.0233871 0.5674666
-2.2718992 -2.0333636 0.5727185
-2.2837020 -2.1281234 0.6370293
-2.2776216 -2.0945745 0.6117839
-2.2726193 -2.0439622 0.5786739
-2.2750700 -2.0758344 0.5986065
-2.2730255 -2.0532048 0.5841993
-2.2806932 -2.1128695 0.6250927
-2.2796886 -2.1064167 0.6201163
-2.2789414 -2.1015518 0.6162671
-2.2744374 -2.0655770 0.5910875
-2.2828634 -2.1222310 0.6312523
-2.2758555 -1.9348611 0.5227305
-2.2728414 -1.9730813 0.5396118
-2.2739861 -2.0593239 0.5869155
-2.2773804 -2.0884906 0.6058492
-2.2807724 -2.1088673 0.6204190
-2.2819356 -2.1155392 0.6251722
-2.2769712 -1.9318755 0.5207652
-2.2735057 -2.0413644 0.5750145
-2.2739134 -2.0520683 0.5816549
-2.2770517 -2.0836961 0.6019399
-2.2839163 -2.1245909 0.6316289
-2.2731485 -2.0271578 0.5666920
-2.2856987 -2.1324757 0.6378731
-2.2792392 -2.0975630 0.6112874
-2.2804117 -2.1043890 0.6158977
-2.2758165 -2.0683948 0.5907340
-2.2748303 -2.0574625 0.5838041
-2.2737840 -1.9796063 0.5407728
-2.2733450 -1.9967117 0.5495312
-2.2732835 -2.0137180 0.5585113
-2.2733143 -2.0176443 0.5606497
-2.2735789 -2.0328045 0.5693002
-2.2737821 -2.0379104 0.5720502
-2.2753114 -2.0632059 0.5872053
-2.2787343 -2.0913455 0.6057997
-2.2850325 -2.1269252 0.6320194
-2.2867477 -2.1348219 0.6382555
-2.2821861 -2.1120709 0.6207268
-2.2747488 -2.0477122 0.5771446
-2.2834337 -2.1188071 0.6254468
-2.2740187 -1.9891819 0.5446506
-2.2738448 -2.0055005 0.5530375
-2.2740027 -2.0238880 0.5632033
-2.2786542 -2.0882173 0.6029138
-2.2747454 -2.0441677 0.5746395
-2.2805881 -2.1008934 0.6117533
-2.2772292 -2.0762178 0.5944190
-2.2844659 -2.1213201 0.6259554
-2.2861890 -2.1292515 0.6321482
-2.2820170 -2.1073047 0.6154674
-2.2744834 -2.0208610 0.5603269
-2.2764115 -2.0655103 0.5869139
-2.2782221 -2.0820357 0.5974040
-2.2747686 -2.0313930 0.5662716
-2.2771893 -2.0712313 0.5903640
-2.2879974 -2.1372445 0.6382931
-2.2759240 -2.0557628 0.5805676
-2.2834063 -2.1147280 0.6208373
-2.2799641 -2.0939324 0.6056718
-2.2753003 -1.9789063 0.5378884
-2.2747981 -2.0171158 0.5576366
-2.2786840 -1.9398014 0.5203484
-2.2751205 -1.9879573 0.5421667
-2.2766898 -2.0610209 0.5828179
-2.2855526 -2.1236368 0.6260901
-2.2755569 -2.0375183 0.5684944
-2.2761793 -2.0472384 0.5740413
-2.2873574 -2.1315458 0.6323326
-2.2754289 -2.0279289 0.5629334
-2.2787942 -2.0792272 0.5939076
-2.2764975 -2.0520170 0.5766942
-2.2811970 -2.0966841 0.6057130
-2.2777525 -2.0685316 0.5867447
-2.2755147 -2.0019688 0.5482751
-2.2755038 -2.0059070 0.5503896
-2.2754470 -2.0098595 0.5524778
-2.2834139 -2.1100089 0.6152345
-2.2758656 -1.9845859 0.5392611
-2.2847587 -2.1173752 0.6206587
-2.2786240 -2.0741210 0.5899500
-2.2883393 -2.1337675 0.6328066
-2.2801649 -2.0866297 0.5979831
-2.2759895 -2.0203197 0.5573328
-2.2812573 -2.0941476 0.6032335
-2.2866825 -2.1258934 0.6263026
-2.2799410 -1.9385217 0.5179423
-2.2760516 -1.9984131 0.5454376
-2.2764198 -2.0349605 0.5652574
-2.2767448 -2.0441968 0.5707531
-2.2778945 -2.0637364 0.5825357
-2.2780580 -2.0604286 0.5798258
-2.2860091 -2.1200550 0.6207292
-2.2838316 -2.1078765 0.6120990
-2.2775423 -2.0505294 0.5736287
-2.2768026 -2.0313871 0.5624181
-2.2847852 -2.1132835 0.6157853
-2.2778053 -1.9698452 0.5305649
-2.2767447 -1.9915927 0.5410912
-2.2767737 -1.9940902 0.5421845
-2.2804405 -2.0836402 0.5946353
-2.2827706 -2.1001834 0.6060219
-2.2877059 -2.1281585 0.6267654
-2.2894814 -2.1360965 0.6329624
-2.2780806 -2.0552228 0.5760136
-2.2793777 -2.0714271 0.5859856
-2.2800884 -2.0770531 0.5895053
-2.2815621 -2.0893632 0.5977161
-2.2826449 -2.0968892 0.6029633
-2.2770518 -2.0235402 0.5572960
-2.2821318 -1.9299804 0.5128472
-2.2806069 -1.9445240 0.5188768
-2.2776609 -2.0415865 0.5671079
-2.2791074 -2.0664520 0.5822587
-2.2776939 -1.9838603 0.5359805
-2.2849959 -2.1105225 0.6122282
-2.2780150 -2.0472079 0.5701827
-2.2906199 -2.1384979 0.6332877
-2.2860048 -2.1159220 0.6159150
-2.2888219 -2.1304580 0.6269467
-2.2872812 -2.1226482 0.6206024
-2.2778703 -1.9887412 0.5377803
-2.2775406 -2.0097581 0.5487235
-2.2775487 -2.0058372 0.5465894
-2.2783624 -1.9803962 0.5336129
-2.2777470 -2.0020429 0.5443832
-2.2792710 -2.0581875 0.5758859
-2.2842946 -2.1030386 0.6056397
-2.2788889 -2.0540252 0.5734912
-2.2820811 -2.0866779 0.5940987
-2.2807772 -2.0744102 0.5858564
-2.2813518 -2.0804192 0.5899106
-2.2780695 -1.9980985 0.5418735
-2.2838465 -2.0993508 0.6029499
-2.2898830 -2.1327262 0.6273752
-2.2830462 -2.0928516 0.5980330
-2.2783879 -2.0347873 0.5615158
-2.2799193 -2.0641049 0.5787253
-2.2862352 -2.1131625 0.6123600
-2.2818139 -1.9432526 0.5164384
-2.2804576 -1.9583513 0.5226440
-2.2805050 -2.0695480 0.5820339
-2.2872058 -2.1185820 0.6160099
-2.2884027 -2.1251532 0.6208459
-2.2918574 -2.1409289 0.6333187
-2.2784478 -2.0267837 0.5565467
-2.2795081 -1.9747036 0.5295631
-2.2792597 -2.0508965 0.5702507
-2.2804118 -2.0609375 0.5755550
-2.2856429 -2.1057350 0.6054111
-2.2910661 -2.1350725 0.6275114
-2.2827346 -2.0834060 0.5897632
-2.2821374 -2.0778770 0.5861705
-2.2874331 -2.1156406 0.6123378
-2.2895688 -2.1274877 0.6209798
-2.2797318 -1.9834007 0.5325618
-2.2804534 -2.0572483 0.5727924
-2.2837639 -2.0904133 0.5941941
-2.2792522 -2.0141730 0.5481396
-2.2845276 -2.0957182 0.5976452
-2.2794267 -2.0056677 0.5433285
-2.2885898 -2.1212244 0.6158329
-2.2796969 -1.9926148 0.5365247
-2.2798585 -1.9882846 0.5343493
-2.2793756 -2.0105017 0.5457831
-2.2796095 -2.0015395 0.5409119
-2.2797027 -2.0228541 0.5521540
-2.2844641 -1.9335263 0.5100264
-2.2921704 -2.1374616 0.6278523
-2.2867815 -2.1082903 0.6056235
-2.2905755 -2.1297516 0.6214446
-2.2807219 -1.9804199 0.5298202
-2.2801264 -2.0381929 0.5602347
-2.2860670 -2.1031017 0.6017555
-2.2816838 -2.0638043 0.5751329
-2.2834260 -2.0805671 0.5859414
-2.2887158 -2.1181713 0.6122667
-2.2814305 -1.9739619 0.5263184
-2.2842719 -2.0863616 0.5892950
-2.2805230 -2.0308102 0.5552206
-2.2850072 -1.9366433 0.5099616
-2.2837807 -1.9478856 0.5145675
-2.2899447 -2.1238575 0.6156650
-2.2852282 -2.0932597 0.5938266
-2.2826643 -1.9625127 0.5206925
-2.2933742 -2.1398301 0.6279411
-2.2807645 -2.0255960 0.5518221
-2.2879800 -2.1107904 0.6055756
-2.2808500 -2.0179029 0.5474265
-2.2821600 -2.0606868 0.5719058
-2.2863147 -2.0988692 0.5970041
-2.2810608 -2.0217979 0.5491745
-2.2813109 -2.0367366 0.5572675
-2.2832036 -2.0712442 0.5779296
-2.2817813 -1.9837622 0.5293785
-2.2816308 -1.9878311 0.5313005
-2.2813021 -1.9970449 0.5358753
-2.2900397 -2.1214340 0.6128186
-2.2813696 -2.0051977 0.5398493
-2.2814422 -2.0013011 0.5377117
-2.2848765 -2.0834679 0.5855209
-2.2881541 -2.1078180 0.6022352
-2.2927979 -2.1342133 0.6219002
-2.2818371 -1.9923869 0.5329147
-2.2814120 -2.0102222 0.5421900
-2.2912206 -2.1263871 0.6155954
-2.2813966 -2.0142220 0.5442471
-2.2891131 -2.1133316 0.6057993
-2.2856884 -2.0891772 0.5889508
-2.2946099 -2.1422797 0.6279547
-2.2838784 -1.9610814 0.5184352
-2.2845307 -2.0787466 0.5819048
-2.2833904 -2.0679247 0.5748598
-2.2867436 -2.0961741 0.5933979
-2.2820698 -2.0286581 0.5512307
-2.2876583 -2.1015860 0.5967539
-2.2843110 -2.0737004 0.5778931
-2.2938596 -2.1365548 0.6222895
-2.2913890 -2.1242190 0.6127993
-2.2869896 -1.9350086 0.5064534
-2.2837484 -2.0639527 0.5711456
-2.2833816 -1.9782308 0.5247164
-2.2824650 -2.0250314 0.5484369
-2.2855646 -2.0811372 0.5819311
-2.2903323 -2.1158455 0.6057514
-2.2896325 -2.1112657 0.6026043
-2.2845717 -1.9676367 0.5194951
-2.2855134 -1.9557965 0.5141659
-2.2835276 -1.9828060 0.5262996
-2.2830562 -2.0481867 0.5604969
-2.2869672 -2.0918915 0.5886963
-2.2886673 -2.1040666 0.5970406
-2.2864582 -2.0865067 0.5849809
-2.2854953 -2.0762039 0.5778235
-2.2831048 -2.0048722 0.5367084
-2.2950034 -2.1388827 0.6224185
-2.2830356 -2.0097343 0.5391756
-2.2882696 -2.0990454 0.5930105
-2.2833101 -2.0405020 0.5556868
-2.2833037 -2.0362124 0.5534556
-2.2837324 -1.9874232 0.5277875
-2.2935157 -2.1312020 0.6159761
-2.2833343 -2.0008203 0.5342752
-2.2912802 -2.1182217 0.6061273
-2.2832478 -2.0179916 0.5430914
-2.2928137 -2.1269388 0.6125543
-2.2865870 -2.0837397 0.5821154
-2.2837221 -1.9925822 0.5299540
-2.2837070 -1.9967535 0.5318339
-2.2836075 -2.0327464 0.5508950
-2.2909109 -2.1139033 0.6024328
-2.2852119 -2.0678376 0.5710710
-2.2836554 -2.0141990 0.5404559
-2.2880606 -1.9425875 0.5067169
-2.2850269 -1.9775471 0.5219372
-2.2840596 -2.0470261 0.5579728
-2.2853843 -1.9730090 0.5199545
-2.2885938 -2.0964880 0.5896053
-2.2839068 -2.0290603 0.5481776
-2.2962734 -2.1419711 0.6231533
-2.2922728 -2.1211024 0.6070147
-2.2902583 -2.1083604 0.5979108
-2.2947375 -2.1341794 0.6168057
-2.2843297 -2.0511110 0.5599991
-2.2879478 -2.0896510 0.5846901
-2.2896270 -2.1018092 0.5927183
-2.2863076 -1.9665318 0.5165400
-2.2887251 -1.9401314 0.5051660
-2.2853770 -1.9824267 0.5232813
-2.2881622 -1.9475483 0.5078698
-2.2941976 -2.1296004 0.6123652
-2.2878570 -2.0864197 0.5818899
-2.2847367 -2.0398197 0.5528120
-2.2866618 -2.0743934 0.5734326
-2.2921353 -2.1165765 0.6025386
-2.2957841 -2.1364898 0.6172249
-2.2974581 -2.1444288 0.6234270
-2.2854461 -1.9873640 0.5250790
-2.2934611 -2.1235895 0.6069845
-2.2849665 -2.0052327 0.5336593
-2.2852168 -2.0443380 0.5544652
-2.2858885 -2.0600971 0.5638595
-2.2878212 -2.0815937 0.5776851
-2.2916165 -2.1112577 0.5978056
-2.2854614 -1.9920798 0.5270082
-2.2855632 -2.0548934 0.5603831
-2.2900425 -2.0999843 0.5899159
-2.2853229 -2.0007130 0.5310019
-2.2908303 -2.1051447 0.5935046
-2.2849654 -2.0224857 0.5424333
-2.2852130 -2.0362274 0.5499591
-2.2869246 -1.9720692 0.5173214
-2.2953407 -2.1321459 0.6125733
-2.2894017 -2.0926584 0.5841686
-2.2857370 -1.9967405 0.5285449
-2.2985687 -2.1468383 0.6237241
-2.2968784 -2.1387550 0.6174132
-2.2932378 -1.9139052 0.4927209
-2.2927980 -1.9172274 0.4940327
-2.2924973 -1.9198465 0.4949846
-2.2907835 -1.9350135 0.5009631
-2.2902802 -1.9390322 0.5027149
-2.2887811 -1.9535694 0.5087585
-2.2881319 -1.9614531 0.5121337
-2.2933767 -2.1192449 0.6023399
-2.2879792 -2.0771665 0.5731193
-2.2860179 -2.0508319 0.5567479
-2.2872263 -1.9772033 0.5184680
-2.2894697 -2.0895672 0.5812504
-2.2888380 -2.0840210 0.5776795
-2.2859123 -2.0331143 0.5467684
-2.2916081 -1.9327589 0.4992691
-2.2889776 -1.9585166 0.5099826
-2.2861053 -2.0149281 0.5364966
-2.2920196 -2.1076723 0.5934302
-2.2930224 -2.1146760 0.5982003
-2.2898914 -1.9473623 0.5051280
-2.2978902 -2.1411022 0.6178000
-2.2965537 -2.1345312 0.6126431
-2.2872986 -1.9817028 0.5200204
-2.2950925 -2.1265867 0.6064806
-2.2873421 -2.0631417 0.5632904
-2.2871832 -1.9872243 0.5223060
-2.2871715 -1.9915161 0.5241203
-2.2884429 -1.9711533 0.5147401
-2.2871534 -2.0578562 0.5594941
-2.2900689 -1.9528705 0.5064531
-2.2866424 -2.0088790 0.5325878
-2.2865253 -2.0219713 0.5394237
-2.2883851 -2.0742774 0.5696648
-2.2908616 -2.0963196 0.5843181
-2.2945789 -2.1217530 0.6022780
-2.2866883 -2.0299668 0.5435886
-2.2976553 -2.1368910 0.6130169
-2.2874438 -1.9961839 0.5256460
-2.2894292 -2.0807424 0.5733420
-2.2870049 -2.0396501 0.5486670
-2.2911933 -1.9454361 0.5028394
-2.2870067 -2.0452064 0.5517550
-2.2990497 -2.1434148 0.6179415
-2.2870130 -2.0265484 0.5410717
-2.2871477 -2.0050826 0.5299718
-2.2875416 -2.0547540 0.5566237
-2.2930461 -1.9314488 0.4969852
-2.2875991 -2.0015633 0.5276415
-2.2889326 -1.9765046 0.5156557
-2.2912625 -2.0935321 0.5807861
-2.2942242 -1.9248170 0.4938483
-2.2966369 -2.1294658 0.6060856
-2.2875545 -2.0191204 0.5360573
-2.2888613 -2.0662271 0.5627166
-2.2987075 -2.1391776 0.6131865
-2.3001606 -2.1458335 0.6182565
-2.2973382 -1.9039830 0.4856735
-2.2928675 -1.9390245 0.4990974
-2.2908977 -1.9581593 0.5069985
-2.2902140 -1.9654723 0.5102760
-2.2889808 -1.9819181 0.5175557
-2.2878157 -2.0369653 0.5455367
-2.2880214 -2.0514116 0.5536112
-2.2885808 -2.0610489 0.5592168
-2.2892135 -2.0701843 0.5648703
-2.2922822 -2.0993895 0.5840819
-2.2897619 -2.0774271 0.5693829
-2.2899270 -1.9701705 0.5121291
-2.2887484 -1.9903186 0.5211515
-2.2918218 -1.9516307 0.5036350
-2.2925586 -1.9444983 0.5007096
-2.2892085 -1.9867197 0.5189347
-2.2909877 -2.0840686 0.5728886
-2.2954951 -1.9221867 0.4915881
-2.2957985 -2.1203935 0.5977475
-2.2966326 -2.1254989 0.6013715
-2.2996740 -2.1414765 0.6136226
-2.2882270 -2.0334728 0.5426129
-2.2885301 -2.0433494 0.5479551
-2.2978382 -2.1321061 0.6062081
-2.3012842 -2.1482557 0.6185668
-2.2890664 -2.0578476 0.5560455
-2.2891926 -1.9961464 0.5228674
-2.2902715 -2.0694762 0.5623711
-2.2963472 -1.9199206 0.4898937
-2.2950791 -1.9304883 0.4939971
-2.2945945 -1.9351013 0.4958636
-2.2922320 -1.9568708 0.5046443
-2.2888153 -2.0173515 0.5329277
-2.2923992 -2.0916422 0.5768105
-2.2935393 -2.1020944 0.5838358
-2.2905241 -1.9761600 0.5130821
-2.2888597 -2.0262456 0.5374157
-2.2889303 -2.0224227 0.5352411
-2.2894757 -2.0008787 0.5243366
-2.2894910 -2.0545337 0.5529665
-2.3009239 -2.1445079 0.6144333
-2.2989772 -2.1344255 0.6063370
-2.2913736 -2.0803502 0.5685831
-2.3024421 -2.1505899 0.6186881
-2.2979360 -2.1281283 0.6012055
-2.2910114 -2.0744604 0.5644544
-2.3005499 -1.8970172 0.4807690
-2.2941840 -1.9434039 0.4982862
-2.2916318 -1.9704242 0.5096286
-2.2903672 -2.0641429 0.5582407
-2.2923054 -2.0868459 0.5725733
-2.2951075 -2.1094950 0.5879235
-2.2960782 -2.1160908 0.5927541
-2.2971316 -2.1230683 0.5975396
-2.2934686 -1.9506660 0.5010833
-2.2909515 -1.9812405 0.5142621
-2.2899877 -2.0058859 0.5255979
-2.3020181 -2.1468804 0.6147937
-2.2906653 -2.0609981 0.5553966
-2.2899017 -2.0377704 0.5421429
-2.3000718 -2.1367772 0.6067215
-2.2997790 -1.9053483 0.4828724
-2.2988190 -1.9119472 0.4851098
-2.2901822 -2.0476122 0.5475160
-2.2908569 -1.9946182 0.5196461
-2.2911998 -2.0666522 0.5585016
-2.2937702 -1.9566736 0.5024496
-2.2921009 -1.9753337 0.5104276
-2.2992114 -2.1313328 0.6018105
-2.2919861 -2.0725980 0.5613637
-2.2914429 -1.9915542 0.5175419
-2.2947636 -2.1004172 0.5793180
-2.2973555 -2.1187916 0.5925222
-2.2928525 -2.0839748 0.5687589
-2.2910244 -2.0577587 0.5522644
-2.2949363 -1.9494080 0.4987598
-2.2957247 -1.9421833 0.4959574
-2.2964952 -2.1122952 0.5875984
-2.3031151 -2.1492791 0.6151282
-2.2911323 -2.0002215 0.5214539
-2.2942788 -2.0950245 0.5756159
-2.2909829 -2.0541088 0.5498805
-2.3011477 -2.1391876 0.6070495
-2.2906602 -2.0218419 0.5318256
-2.2979574 -1.9276219 0.4896990
-2.2927633 -2.0778542 0.5636035
-2.2908422 -2.0303433 0.5360034
-2.2921540 -2.0698275 0.5590049
-2.2925754 -1.9805893 0.5114404
-2.2907952 -2.0259950 0.5337709
-2.3003632 -1.9106263 0.4829156
-2.2970711 -1.9357981 0.4926429
-2.2942468 -1.9615967 0.5032314
-2.2935554 -1.9687955 0.5060770
-2.3003260 -2.1337778 0.6021142
-2.2921812 -2.0640840 0.5548203
-2.2967475 -1.9402863 0.4940853
-2.2917063 -2.0050261 0.5224192
-2.3022990 -2.1421263 0.6079172
-2.3042954 -2.1516070 0.6152557
-2.2941349 -2.0869140 0.5686569
-2.2929695 -1.9855763 0.5126944
-2.2915594 -2.0414164 0.5410574
-2.2988271 -2.1218224 0.5922913
-2.2998023 -2.1284180 0.5971271
-2.2960743 -2.1032133 0.5789856
-2.2933944 -2.0765863 0.5615495
-2.2918339 -2.0108093 0.5245211
-2.2955850 -1.9555649 0.4995199
-2.2964836 -1.9482255 0.4963955
-2.2980583 -2.1158996 0.5878181
-2.2932520 -2.0726822 0.5589743
-2.2926235 -2.0616912 0.5521503
-2.3018629 -2.1377258 0.6033364
-2.2959817 -2.0982675 0.5748902
-2.3029774 -1.9026899 0.4785666
-2.2954377 -2.0930658 0.5713573
-2.2975930 -2.1105173 0.5831563
-2.2925100 -2.0517702 0.5456559
-2.2929840 -1.9994746 0.5182669
-2.2943030 -2.0809863 0.5629787
-2.3054525 -2.1539377 0.6153840
-2.3008490 -2.1308982 0.5974045
-2.2929926 -2.0042539 0.5200537
-2.2936382 -2.0679031 0.5547943
-2.3000284 -2.1250426 0.5928701
-2.2923874 -2.0306889 0.5333915
-2.3040061 -1.9003842 0.4769923
-2.3021485 -1.9116582 0.4807805
-2.3017905 -1.9142931 0.4816945
-2.2955068 -2.0897240 0.5683162
-2.2931915 -2.0578932 0.5483274
-2.2925134 -2.0257887 0.5304938
-2.3043963 -2.1466465 0.6085753
-2.2946139 -2.0793958 0.5611806
-2.2945104 -2.0757300 0.5587970
-2.2970884 -1.9546842 0.4969003
-2.2976633 -2.1066942 0.5789715
-2.2965426 -2.0962901 0.5718861
-2.2929483 -2.0351085 0.5347480
-2.2972699 -2.1019427 0.5753635
-2.2996217 -2.1189415 0.5872660
-2.2931396 -2.0226901 0.5277505
-2.3021805 -2.1340783 0.5980317
-2.2991059 -2.1139470 0.5835334
-2.3038378 -2.1421845 0.6040598
-2.2935980 -2.0101593 0.5212115
-2.3013191 -2.1277084 0.5926740
-2.3056625 -2.1492050 0.6087557
-2.2977044 -1.9599103 0.4980280
-2.2939875 -2.0149151 0.5226255
-2.3049998 -2.1445767 0.6044015
-2.2985406 -2.1046414 0.5751210
-2.2948003 -2.0619652 0.5480556
-2.2946885 -2.0566833 0.5446864
-2.2980424 -2.0992214 0.5714440
-2.2964566 -1.9754455 0.5032019
-2.2942506 -2.0423905 0.5364146
-2.2967952 -2.0865092 0.5627182
-2.3035798 -2.1366686 0.5979050
-2.2959825 -2.0786177 0.5580086
-2.3004426 -2.1166669 0.5832821
-2.3025905 -2.1304628 0.5926889
-2.3068725 -2.1515181 0.6088908
-2.2943152 -2.0297142 0.5291691
-2.2955398 -2.0678268 0.5509970
-2.2944491 -2.0346368 0.5316414
-2.2946919 -2.0270601 0.5271641
-2.2963607 -2.0739747 0.5540730
-2.3002272 -2.1122426 0.5790263
-2.3062110 -2.1469687 0.6044657
-2.2950201 -2.0393655 0.5331522
-2.2973116 -2.0852551 0.5602667
-2.3042400 -1.9199680 0.4795221
-2.2955378 -2.0502344 0.5388134
-2.2985595 -2.0959780 0.5670639
-2.3027679 -2.1262345 0.5879407
-2.3053811 -2.1410846 0.5989562
-2.3080890 -2.1538822 0.6090058
-2.2955227 -2.0143732 0.5196437
-2.3018055 -2.1194677 0.5829574
-2.2962117 -2.0650438 0.5474528
-2.3000647 -2.1074291 0.5744688
-2.2995297 -2.1022414 0.5709142
-2.3040742 -2.1332085 0.5924141
-2.2957294 -2.0464626 0.5361265
-2.3070218 -1.9070321 0.4742334
-2.3025623 -1.9381452 0.4855612
-2.2970500 -2.0709737 0.5503412
-2.3076196 -2.1497296 0.6044568
-2.3016324 -2.1149697 0.5787663
-2.2960134 -2.0192618 0.5210021
-2.2968020 -2.0607551 0.5432531
-2.2960991 -2.0343809 0.5283968
-2.2962826 -2.0388950 0.5304503
-2.2980249 -2.0771155 0.5530458
-2.3040898 -2.1289155 0.5877273
-2.3008777 -2.1052022 0.5707810
-2.3001666 -2.0996954 0.5671684
-2.3032033 -2.1222182 0.5826798
-2.2966853 -2.0436860 0.5326563
-2.3101643 -2.1583410 0.6097211
-2.2976798 -2.0684350 0.5469825
-2.3074419 -2.1454840 0.5994728
-2.2971631 -2.0499245 0.5356130
-2.2971526 -2.0533687 0.5377462
-2.3090603 -2.1523395 0.6043091
-2.3061942 -2.1378474 0.5929792
-2.2970028 -2.0269921 0.5229468
-2.3030696 -2.1176486 0.5782289
-2.2997360 -2.0898222 0.5592844
-2.2975021 -2.0185802 0.5180953
-2.3053996 -2.1315242 0.5875822
-2.3086202 -2.1479796 0.5997209
-2.3015992 -2.1028150 0.5668957
-2.3022712 -2.1080069 0.5704477
-2.2984744 -2.0642833 0.5422492
-2.2980044 -2.0239614 0.5197624
-2.3003546 -1.9751969 0.4961637
-2.3108337 -2.1563923 0.6054353
-2.2979271 -2.0383046 0.5270773
-2.2980974 -2.0468680 0.5319370
-2.3042948 -2.1204070 0.5782633
-2.3054351 -2.1274017 0.5830341
-2.2981944 -2.0433010 0.5294705
-2.2995366 -2.0719896 0.5460011
-2.3066787 -2.1340850 0.5874830
-2.2984131 -2.0303520 0.5221346
-2.3083646 -2.1424337 0.5935748
-2.2987555 -2.0530659 0.5345321
-2.3099225 -2.1504375 0.5997202
-2.3040259 -2.1156499 0.5739837
-2.3015530 -2.0933084 0.5583586
-2.3030440 -2.1056711 0.5665171
-2.3065229 -2.1297897 0.5830897
-2.3028101 -1.9626989 0.4891453
-2.3006608 -2.0788393 0.5489130
-2.3122697 -2.1590130 0.6052796
-2.3077073 -2.1364849 0.5878360
-2.2998956 -2.0674615 0.5415645
-2.3056166 -2.1230420 0.5780913
-2.3095419 -2.1449085 0.5938435
-2.2995700 -2.0233381 0.5168176
-2.3111700 -2.1528443 0.5997694
-2.2997406 -2.0502941 0.5310614
-2.2998359 -2.0196396 0.5145382
-2.2997044 -2.0280799 0.5187119
-2.3018345 -2.0853650 0.5516727
-2.3053546 -2.1184380 0.5736692
-2.3021363 -2.0920247 0.5559411
-2.3088166 -2.1395821 0.5888399
-2.3076407 -2.1323296 0.5833137
-2.2998535 -2.0426763 0.5261343
-2.3000508 -2.0470368 0.5283384
-2.3043858 -2.1084456 0.5662095
-2.3005591 -2.0657821 0.5390935
-2.3014051 -2.0762227 0.5452553
-2.3107266 -2.1473170 0.5938906
-2.3017997 -1.9917250 0.5003051
-2.3010980 -1.9963799 0.5020258
-2.3004187 -2.0160684 0.5117251
-2.3005124 -2.0566500 0.5335237
-2.3018211 -2.0815720 0.5486100
-2.3123230 -2.1552389 0.6001073
-2.3033119 -2.0966241 0.5575698
-2.3027182 -1.9803303 0.4944963
-2.3014341 -2.0706652 0.5408747
-2.3099311 -2.1418588 0.5890070
-2.3075481 -2.1277131 0.5786134
-2.3007204 -2.0308202 0.5183038
-2.3030254 -2.0880833 0.5513859
-2.3060554 -2.1168650 0.5706421
-2.3067481 -2.1220408 0.5742128
-2.3089201 -2.1355487 0.5838986
-2.3057621 -2.1114548 0.5660257
-2.3013799 -2.0538138 0.5300923
-2.3121365 -2.1505567 0.5944708
-2.3044477 -2.0994015 0.5576002
-2.3052136 -2.1061460 0.5622476
-2.3014484 -2.0232750 0.5134546
-2.3012942 -2.0356509 0.5197332
-2.3012071 -2.0403331 0.5223327
-2.3031951 -2.0846884 0.5483756
-2.3111191 -2.1443398 0.5892754
-2.3087660 -2.1310575 0.5793928
-2.3015259 -2.0275588 0.5152993
-2.3077870 -2.1245079 0.5745125
-2.3041835 -2.0956977 0.5548578
-2.3016076 -2.0465613 0.5252880
-2.3027911 -2.0745044 0.5411958
-2.3049275 -1.9681159 0.4871218
-2.3030601 -2.0796139 0.5443882
-2.3019276 -2.0195718 0.5107447
-2.3019336 -2.0504335 0.5270960
-2.3021865 -2.0117579 0.5065305
-2.3060744 -1.9604626 0.4837399
-2.3042569 -1.9795749 0.4917518
-2.3022376 -2.0609815 0.5330372
-2.3149786 -2.1615010 0.6017606
-2.3074154 -2.1196463 0.5703351
-2.3132874 -2.1530225 0.5947482
-2.3032248 -1.9959359 0.4986281
-2.3123066 -2.1467116 0.5893544
-2.3032799 -2.0009532 0.5002725
-2.3066018 -2.1096361 0.5625510
-2.3090045 -2.1270500 0.5744252
-2.3112227 -2.1402852 0.5840606
-2.3101094 -2.1336852 0.5792313
-2.3025714 -2.0437780 0.5218350
-2.3030164 -2.0579511 0.5297754
-2.3039142 -2.0769470 0.5407649
-2.3076730 -2.1154008 0.5655931
-2.3145170 -2.1553644 0.5948542
-2.3036930 -2.0733041 0.5383373
-2.3065022 -1.9670680 0.4846217
-2.3049870 -1.9855794 0.4927464
-2.3034071 -2.0105395 0.5040790
-2.3031135 -2.0184893 0.5081474
-2.3028926 -2.0400084 0.5191684
-2.3054143 -2.0935270 0.5508150
-2.3045788 -2.0826438 0.5438479
-2.3030559 -2.0274382 0.5125881
-2.3134855 -2.1490594 0.5894575
-2.3033515 -2.0228977 0.5099170
-2.3061647 -2.0991798 0.5539374
-2.3053790 -2.0886034 0.5470849
-2.3123382 -2.1427276 0.5843699
-2.3033774 -2.0322705 0.5144488
-2.3113543 -2.1363411 0.5793339
-2.3035328 -2.0546491 0.5266945
-2.3047828 -1.9951212 0.4958741
-2.3040133 -2.0645566 0.5320389
-2.3156061 -2.1577110 0.5952385
-2.3038679 -2.0154837 0.5053761
-2.3036430 -2.0502413 0.5237989
-2.3078766 -2.1124012 0.5622514
-2.3103574 -2.1297391 0.5742061
-2.3051076 -1.9998435 0.4973748
-2.3057910 -2.0855340 0.5438063
-2.3134519 -2.1451528 0.5846915
-2.3091774 -2.1186005 0.5652270
-2.3146638 -2.1514268 0.5895435
-2.3053271 -2.0799420 0.5402582
-2.3071840 -1.9730164 0.4851018
-2.3039471 -2.0427511 0.5187871
-2.3062894 -1.9844467 0.4902146
-2.3125406 -2.1387457 0.5793778
-2.3052875 -2.0765366 0.5376306
-2.3048047 -2.0615309 0.5287774
-2.3043976 -2.0471617 0.5205505
-2.3116100 -2.1324838 0.5742318
-2.3091417 -2.1153010 0.5621695
-2.3084904 -1.9667491 0.4816416
-2.3044654 -2.0392012 0.5159371
-2.3073358 -2.0977880 0.5504321
-2.3106475 -2.1256979 0.5692714
-2.3048181 -2.0221298 0.5070887
-2.3157351 -2.1537958 0.5899146
-2.3068663 -2.0922769 0.5468095
-2.3078861 -2.1033003 0.5536672
-2.3052077 -2.0144954 0.5027324
-2.3135525 -2.1410855 0.5797835
-2.3052214 -2.0581139 0.5257901
-2.3068953 -2.0881744 0.5435857
-2.3051075 -2.0316052 0.5111008
-2.3085712 -1.9716700 0.4828338
-2.3051764 -2.0276681 0.5090009
-2.3149510 -2.1478590 0.5844546
-2.3058094 -2.0681212 0.5310513
-2.3052906 -2.0362696 0.5130833
-2.3065086 -1.9990140 0.4945745
-2.3116699 -2.1281708 0.5695643
-2.3056837 -2.0193221 0.5041516
-2.3106540 -2.1213377 0.5646301
-2.3168347 -2.1561773 0.5902717
-2.3055644 -2.0546313 0.5228486
-2.3070745 -2.0839705 0.5400749
-2.3129437 -2.1351023 0.5740764
-2.3068189 -2.0796498 0.5370270
-2.3090347 -2.1060965 0.5536941
-2.3098538 -1.9648540 0.4792350
-2.3080680 -1.9839707 0.4872786
-2.3075801 -1.9911270 0.4902357
-2.3062685 -2.0646626 0.5281204
-2.3077564 -2.0911855 0.5442538
-2.3106848 -2.1182904 0.5616740
-2.3059414 -2.0466393 0.5175449
-2.3061003 -2.0515479 0.5200341
-2.3117336 -2.1239149 0.5648306
-2.3071072 -2.0046497 0.4959196
-2.3082377 -1.9889229 0.4884809
-2.3197525 -2.1665674 0.5967432
-2.3128265 -2.1306214 0.5695610
-2.3063490 -2.0265000 0.5064886
-2.3140599 -2.1375996 0.5743381
-2.3180404 -2.1585624 0.5903625
-2.3068268 -2.0614662 0.5249774
-2.3168883 -2.1522780 0.5852117
-2.3158777 -2.1459507 0.5801393
-2.3085900 -2.0872820 0.5396734
-2.3105071 -1.9707737 0.4797379
-2.3074320 -2.0097012 0.4970839
-2.3093967 -2.0979136 0.5464711
-2.3110044 -2.1140826 0.5569066
-2.3066583 -2.0440570 0.5146129
-2.3127017 -2.1263339 0.5651730
-2.3071028 -2.0190361 0.5015572
-2.3070928 -2.0316574 0.5077035
-2.3091173 -2.0941050 0.5438149
-2.3190755 -2.1608863 0.5907734
-2.3070315 -2.0356205 0.5097278
-2.3122263 -2.1214856 0.5613152
-2.3073097 -2.0581662 0.5218878
-2.3077554 -2.0678618 0.5274324
-2.3140594 -2.1331239 0.5695126
-2.3082881 -2.0034466 0.4934178
-2.3076213 -2.0237759 0.5030811
-2.3084483 -2.0786137 0.5332365
-2.3073651 -2.0401658 0.5113786
-2.3089829 -2.0841667 0.5364348
-2.3106240 -1.9766474 0.4811669
-2.3136702 -2.1287503 0.5655154
-2.3171442 -2.1483795 0.5801621
-2.3078525 -2.0551367 0.5190233
-2.3092983 -1.9961922 0.4890167
-2.3082927 -2.0646878 0.5242639
-2.3122103 -2.1167028 0.5567357
-2.3118067 -1.9694879 0.4773598
-2.3161350 -2.1420646 0.5747649
-2.3080025 -2.0511635 0.5164819
-2.3152469 -2.1363737 0.5703781
-2.3190829 -2.1569309 0.5857667
-2.3102370 -1.9887937 0.4852747
-2.3106826 -2.0973731 0.5434529
-2.3110693 -2.1011462 0.5457692
-2.3094265 -2.0810691 0.5331653
-2.3136912 -2.1243106 0.5609656
-2.3114886 -2.1065413 0.5491005
-2.3102199 -2.0902622 0.5388004
-2.3123465 -2.1123545 0.5524553
-2.3088003 -2.0616987 0.5213167
-2.3085912 -2.0481045 0.5137086
-2.3148688 -2.1312514 0.5654636
-2.3089310 -2.0141639 0.4963654
-2.3092807 -2.0718654 0.5272285
-2.3087949 -2.0309496 0.5043877
-2.3133909 -2.1194536 0.5567872
-2.3087451 -2.0401945 0.5090298
-2.3120400 -1.9756608 0.4785272
-2.3202481 -2.1594258 0.5860175
-2.3091138 -2.0231948 0.5001250
-2.3090477 -2.0357030 0.5063063
-2.3089677 -2.0444475 0.5109399
-2.3165318 -2.1388926 0.5703175
-2.3211655 -1.9125330 0.4546007
-2.3118003 -1.9832848 0.4812142
-2.3107661 -1.9946014 0.4863951
-2.3180683 -2.1472026 0.5764529
-2.3096498 -2.0684859 0.5241974
-2.3107871 -2.0873377 0.5353990
-2.3193643 -2.1530075 0.5804313
-2.3149319 -2.1268234 0.5609011
-2.3095535 -2.0583031 0.5179338
-2.3124997 -2.1044018 0.5453977
-2.3130280 -2.1097401 0.5487861
-2.3202076 -2.1558774 0.5819389
-2.3221644 -1.9095647 0.4525533
-2.3119087 -1.9876669 0.4823198
-2.3108083 -2.0040820 0.4896796
-2.3136724 -2.1157933 0.5527900
-2.3162012 -2.1338487 0.5653253
-2.3228029 -2.1687833 0.5918788
-2.3100910 -2.0183825 0.4961649
-2.3175646 -2.1412787 0.5706671
-2.3146151 -2.1220085 0.5566758
-2.3117507 -2.0933838 0.5381733
-2.3214827 -2.1618706 0.5860302
-2.3111241 -2.0843027 0.5324540
-2.3099108 -2.0550653 0.5152367
-2.3125339 -2.1007547 0.5426166
-2.3114162 -2.0001611 0.4872316
-2.3194148 -2.1497665 0.5763508
-2.3110092 -2.0752663 0.5263869
-2.3104440 -2.0647851 0.5203013
-2.3103595 -2.0286860 0.5006051
-2.3118977 -2.0901572 0.5354014
-2.3161091 -2.1299195 0.5615836
-2.3109376 -2.0716458 0.5239423
-2.3107341 -2.0210565 0.4961950
-2.3104630 -2.0476656 0.5101960
-2.3157137 -2.1252615 0.5575340
-2.3124411 -1.9940088 0.4835322
-2.3186323 -2.1435556 0.5708480
-2.3106370 -2.0401049 0.5056912
-2.3227827 -2.1649199 0.5867903
-2.3106885 -2.0357771 0.5034869
-2.3138725 -2.1079760 0.5455929
-2.3118178 -2.0814111 0.5290389
-2.3149573 -2.1184862 0.5525532
-2.3110131 -2.0618147 0.5173812
-2.3144341 -2.1133061 0.5490007
-2.3107207 -2.0438545 0.5075387
-2.3132301 -2.0965845 0.5378699
-2.3112039 -2.0274824 0.4985307
-2.3125118 -2.0872349 0.5320047
-2.3126801 -1.9989766 0.4847461
-2.3222707 -2.1605268 0.5825054
-2.3207302 -2.1523126 0.5762673
-2.3139129 -2.1036911 0.5421487
-2.3115500 -2.0685675 0.5206658
-2.3172799 -2.1324074 0.5615468
-2.3118388 -2.0150212 0.4919625
-2.3185571 -2.1394601 0.5662681
-2.3238127 -2.1672098 0.5872307
-2.3117519 -2.0587158 0.5141866
-2.3161142 -2.1210018 0.5524783
-2.3124745 -2.0748131 0.5232682
-2.3131412 -2.0040328 0.4859555
-2.3142055 -1.9884638 0.4790033
-2.3119541 -2.0330090 0.5000696
-2.3159404 -1.9698859 0.4709789
-2.3128759 -2.0093712 0.4883709
-2.3205519 -2.1482164 0.5716823
-2.3218078 -2.1546844 0.5766389
-2.3146881 -2.1066292 0.5428878
-2.3128863 -2.0788460 0.5253714
-2.3131487 -2.0842959 0.5286269
-2.3120391 -2.0247533 0.4956824
-2.3183803 -2.1349483 0.5617789
-2.3154167 -2.1109699 0.5450885
-2.3122157 -2.0513050 0.5091414
-2.3160144 -2.1155835 0.5479004
-2.3121593 -2.0435029 0.5048190
-2.3138649 -2.0903528 0.5317548
-2.3142157 -1.9930712 0.4804210
-2.3237324 -2.1631600 0.5823147
-2.3124895 -2.0658124 0.5171358
-2.3123631 -2.0562061 0.5115975
-2.3124025 -2.0476323 0.5068096
-2.3126056 -2.0222316 0.4936080
-2.3128203 -2.0714630 0.5202049
-2.3144774 -2.0959857 0.5348875
-2.3124180 -2.0394399 0.5023623
-2.3171648 -2.1235463 0.5527173
-2.3182439 -2.1304607 0.5572488
-2.3145525 -1.9986421 0.4816982
-2.3247427 -1.9162558 0.4494578
-2.3195936 -2.1374443 0.5617359
-2.3259678 -2.1717343 0.5876442
-2.3161386 -2.1097434 0.5426536
-2.3144270 -2.0873528 0.5284282
-2.3133324 -2.0621241 0.5132792
-2.3133370 -2.0321749 0.4972845
-2.3149257 -2.0936815 0.5321355
-2.3172338 -2.1189934 0.5482577
-2.3210718 -2.1447025 0.5662613
-2.3136860 -2.0191965 0.4904755
-2.3158596 -2.1024001 0.5373550
-2.3147466 -2.0029432 0.4829446
-2.3141676 -2.0781945 0.5224152
-2.3251676 -2.1658975 0.5820535
-2.3182828 -2.1260031 0.5527000
-2.3170106 -2.1140510 0.5445063
-2.3135772 -2.0365997 0.4990330
-2.3145401 -2.0084502 0.4852160
-2.3161088 -1.9880499 0.4759810
-2.3137457 -2.0287582 0.4948197
-2.3157129 -2.0986917 0.5346201
-2.3136895 -2.0595719 0.5111678
-2.3194735 -2.1331949 0.5573073
-2.3229018 -2.1529601 0.5718398
-2.3270531 -2.1740838 0.5880244
-2.3138556 -2.0430234 0.5017708
-2.3138691 -2.0556141 0.5086112
-2.3166344 -2.1054055 0.5380219
-2.3140471 -2.0511883 0.5057674
-2.3233831 -1.9321998 0.4530512
-2.3172195 -1.9818197 0.4723864
-2.3144694 -2.0696724 0.5159325
-2.3183837 -2.1217101 0.5483442
-2.3140975 -2.0469804 0.5034530
-2.3179907 -1.9746164 0.4690386
-2.3192893 -2.1284871 0.5529899
-2.3227153 -2.1488788 0.5672589
-2.3159476 -2.0912056 0.5283636
-2.3265265 -2.1684563 0.5819587
-2.3164478 -1.9977447 0.4786024
-2.3146587 -2.0268802 0.4923721
-2.3147468 -2.0660767 0.5130924
-2.3178004 -2.1127149 0.5418130
-2.3207435 -2.1357853 0.5571752
-2.3152953 -2.0773730 0.5196169
-2.3184623 -2.1170193 0.5440247
-2.3153204 -2.0185542 0.4875767
-2.3171398 -2.1023907 0.5347024
-2.3151280 -2.0315662 0.4939428
-2.3151336 -2.0400604 0.4981087
-2.3151801 -2.0360785 0.4960006
-2.3163583 -2.0879767 0.5252293
-2.3204075 -2.1309466 0.5529740
-2.3154076 -2.0238277 0.4896547
-2.3275879 -2.1708200 0.5823295
-2.3179726 -2.1082624 0.5376395
-2.3152817 -2.0626571 0.5101275
-2.3283022 -1.9109648 0.4442261
-2.3167068 -2.0035831 0.4801483
-2.3160142 -2.0823644 0.5216925
-2.3224148 -2.1431364 0.5613074
-2.3164203 -2.0076133 0.4820511
-2.3177972 -1.9920031 0.4746883
-2.3159447 -2.0727823 0.5152998
-2.3155880 -2.0591673 0.5076333
-2.3165197 -2.0126560 0.4836915
-2.3155969 -2.0462951 0.5006003
-2.3155785 -2.0553507 0.5053490
-2.3283409 -1.9146211 0.4443810
-2.3204343 -1.9669720 0.4632213
-2.3191482 -1.9814605 0.4694086
-2.3267625 -2.1649072 0.5765703
-2.3174065 -2.0942743 0.5277937
-2.3157930 -2.0513583 0.5029037
-2.3162059 -2.0695352 0.5125882
-2.3199270 -1.9742517 0.4659939
-2.3193428 -2.1158542 0.5411873
-2.3184313 -2.1052160 0.5343441
-2.3215378 -2.1335870 0.5531203
-2.3198401 -2.1198718 0.5436411
-2.3191094 -1.9860129 0.4709356
-2.3180738 -1.9977985 0.4762010
-2.3236930 -2.1457656 0.5611430
-2.3269016 -1.9262525 0.4473217
-2.3205723 -1.9719292 0.4644024
-2.3169692 -2.0179861 0.4846749
-2.3165606 -2.0311456 0.4913120
-2.3164047 -2.0442412 0.4981173
-2.3183827 -2.1004028 0.5305026
-2.3166601 -2.0661522 0.5095781
-2.3182930 -2.0027254 0.4775277
-2.3201497 -1.9796987 0.4673971
-2.3196375 -2.1114980 0.5369298
-2.3171475 -2.0224948 0.4862583
-2.3169151 -2.0396385 0.4950296
-2.3282353 -2.1678696 0.5763547
-2.3170192 -2.0354615 0.4926841
-2.3172226 -2.0275565 0.4885477
-2.3173779 -2.0759786 0.5146033
-2.3235363 -2.1414944 0.5567377
-2.3170973 -2.0626014 0.5067214
-2.3171959 -2.0588109 0.5044784
-2.3182411 -2.0116762 0.4806144
-2.3248168 -2.1482366 0.5611261
-2.3230194 -2.1364449 0.5527452
-2.3264609 -1.9360263 0.4492654
-2.3196284 -1.9969265 0.4735841
-2.3209162 -2.1190133 0.5405382
-2.3262550 -1.9388641 0.4501666
-2.3177434 -2.0724885 0.5116789
-2.3184070 -2.0867814 0.5199993
-2.3195825 -2.1031213 0.5302225
-2.3193043 -2.0984503 0.5271123
-2.3175699 -2.0550314 0.5018250
-2.3209741 -1.9851360 0.4677915
-2.3221737 -2.1253795 0.5437372
-2.3185806 -2.0175886 0.4822002
-2.3219487 -1.9763090 0.4636509
-2.3207478 -1.9907860 0.4699010
-2.3270128 -2.1572819 0.5662800
-2.3314670 -2.1783039 0.5824937
-2.3199469 -2.0019555 0.4747697
-2.3183642 -2.0696996 0.5085952
-2.3213087 -2.1147971 0.5361506
-2.3298237 -2.1705628 0.5758498
-2.3183734 -2.0437287 0.4946899
-2.3221582 -1.9794059 0.4643050
-2.3189124 -2.0224995 0.4835070
-2.3188388 -2.0269065 0.4856496
-2.3252373 -2.1445033 0.5559060
-2.3223377 -2.1228272 0.5408991
-2.3186925 -2.0398055 0.4921527
-2.3309362 -1.9176516 0.4411637
-2.3238380 -1.9647149 0.4579063
-2.3229776 -1.9726417 0.4611355
-2.3247067 -2.1401877 0.5528309
-2.3265923 -2.1522692 0.5612503
-2.3289856 -2.1652613 0.5711115
-2.3186736 -2.0660456 0.5058141
-2.3203729 -2.0070757 0.4759019
-2.3187706 -2.0622681 0.5035578
-2.3234232 -2.1280211 0.5435417
-2.3223543 -1.9843804 0.4654949
-2.3283469 -2.1600785 0.5662379
-2.3214313 -1.9958914 0.4705840
-2.3311558 -2.1737449 0.5767607
-2.3310115 -1.9205548 0.4413478
-2.3255908 -1.9558016 0.4536092
-2.3238632 -1.9696945 0.4590095
-2.3201471 -2.0903666 0.5189759
-2.3245708 -2.1350630 0.5479390
-2.3194901 -2.0761098 0.5106318
-2.3200792 -2.0165815 0.4796204
-2.3206799 -2.0973174 0.5233581
-2.3215379 -2.0010746 0.4721006
-2.3193758 -2.0585036 0.5004832
-2.3278107 -2.1547644 0.5612110
-2.3215106 -2.1025884 0.5256105
-2.3296826 -1.9329203 0.4443690
-2.3198634 -2.0469861 0.4939503
-2.3307160 -2.1693242 0.5722276
-2.3322149 -2.1760463 0.5771813
-2.3227718 -1.9900474 0.4667674
-2.3230241 -2.1181549 0.5353225
-2.3238288 -2.1258215 0.5403963
-2.3206360 -2.0218734 0.4806895
-2.3248622 -2.1315705 0.5437907
-2.3201986 -2.0739075 0.5078042
-2.3297276 -2.1626901 0.5660912
-2.3203456 -2.0434033 0.4911208
-2.3202647 -2.0702633 0.5054064
-2.3330177 -1.9173293 0.4383231
-2.3306584 -1.9306181 0.4427773
-2.3270318 -1.9544913 0.4513284
-2.3244671 -1.9763059 0.4599734
-2.3240525 -1.9803231 0.4618060
-2.3206572 -2.0303012 0.4843588
-2.3207944 -2.0839154 0.5130707
-2.3259606 -2.1384849 0.5483195
-2.3335032 -2.1796370 0.5790238
-2.3207921 -2.0263624 0.4822926
-2.3316928 -2.1716043 0.5726816
-2.3221624 -2.0060476 0.4728961
-2.3289948 -2.1573073 0.5614265
-2.3204639 -2.0664200 0.5027801
-2.3279485 -2.1507440 0.5562594
-2.3243604 -1.9836022 0.4623112
-2.3308999 -2.1657927 0.5670851
-2.3257528 -1.9700010 0.4565373
-2.3296844 -1.9415705 0.4459460
-2.3262015 -1.9667121 0.4551822
-2.3210933 -2.0358948 0.4862375
-2.3211563 -2.0804264 0.5101488
-2.3231423 -2.1110027 0.5287620
-2.3224882 -2.1020471 0.5229200
-2.3232808 -2.0000262 0.4690894
-2.3252965 -2.1287310 0.5399718
-2.3243238 -1.9890520 0.4641179
-2.3329250 -2.1741349 0.5728908
-2.3247327 -2.1221035 0.5352119
-2.3221900 -2.0209512 0.4780460
-2.3290120 -2.1531929 0.5565687
-2.3220018 -2.0905352 0.5149319
-2.3284658 -1.9531819 0.4490415
-2.3276108 -1.9604280 0.4517980
-2.3258431 -1.9750070 0.4576456
-2.3213661 -2.0637053 0.4996952
-2.3232527 -2.1061221 0.5246188
-2.3243121 -2.1170525 0.5315461
-2.3279656 -2.1463436 0.5516689
-2.3302115 -2.1598060 0.5613866
-2.3265942 -2.1346217 0.5429063
-2.3236701 -2.0051301 0.4702288
-2.3320558 -2.1680234 0.5670320
-2.3224788 -2.0874976 0.5120452
-2.3219941 -2.0738832 0.5043594
-2.3220995 -2.0777913 0.5065331
-2.3336751 -1.9243323 0.4381791
-2.3332566 -1.9269842 0.4390375
-2.3259896 -1.9799643 0.4588341
-2.3219006 -2.0594263 0.4963251
-2.3248097 -1.9944703 0.4650569
-2.3340031 -2.1763944 0.5731119
-2.3226837 -2.0264411 0.4795052
-2.3263702 -2.1311984 0.5399439
-2.3301044 -2.1555159 0.5567030
-2.3247283 -2.1142602 0.5280174
-2.3329910 -2.1703701 0.5677136
-2.3239783 -2.0110241 0.4718129
-2.3291247 -2.1488653 0.5516015
-2.3290349 -1.9590818 0.4495478
-2.3259264 -1.9882084 0.4614991
-2.3256004 -2.1197899 0.5312665
-2.3262790 -2.1251361 0.5346744
-2.3320829 -2.1640349 0.5623362
-2.3233760 -2.0939637 0.5144171
-2.3279827 -2.1374055 0.5425953
-2.3274558 -2.1337915 0.5401412
-2.3341031 -2.1727338 0.5680847
-2.3278264 -1.9746448 0.4547093
-2.3241573 -2.1006439 0.5178309
-2.3292342 -2.1446320 0.5471656
-2.3312629 -2.1578269 0.5568343
-2.3301982 -2.1513919 0.5518439
-2.3247899 -2.1059252 0.5209033
-2.3264623 -1.9935832 0.4624240
-2.3331576 -2.1663188 0.5624985
-2.3239986 -2.0916498 0.5116973
-2.3289288 -2.1398128 0.5429519
-2.3244526 -2.0257866 0.4766642
-2.3377629 -1.9127170 0.4316826
-2.3358170 -1.9240039 0.4353875
-2.3335693 -1.9372786 0.4399224
-2.3314492 -1.9505456 0.4445536
-2.3235126 -2.0637879 0.4957735
-2.3268709 -2.1224586 0.5310521
-2.3262681 -2.1173990 0.5273808
-2.3236614 -2.0678482 0.4978085
-2.3306301 -1.9579734 0.4471335
-2.3240800 -2.0824785 0.5057771
-2.3323660 -2.1602810 0.5571353
-2.3287816 -2.1366288 0.5401120
-2.3289823 -1.9728126 0.4527541
-2.3277682 -2.1281013 0.5341970
-2.3257632 -2.0099901 0.4688077
-2.3239711 -2.0775121 0.5028828
-2.3314052 -2.1538144 0.5518700
-2.3249615 -2.0980463 0.5141522
-2.3245633 -2.0876282 0.5080718
-2.3372123 -2.1830191 0.5741072
-2.3278701 -2.1249952 0.5312938
-2.3300712 -2.1424674 0.5430843
-2.3361009 -2.1770319 0.5686705
-2.3311400 -2.1492105 0.5477767
-2.3256525 -2.1039483 0.5170387
-2.3334785 -2.1626783 0.5574856
-2.3374163 -1.9220285 0.4331084
-2.3249928 -2.0395692 0.4813144
-2.3268485 -2.1147450 0.5237332
-2.3324549 -2.1561912 0.5522458
-2.3310470 -1.9639734 0.4479000
-2.3352088 -2.1707908 0.5632240
-2.3276427 -2.1202404 0.5270084
-2.3290664 -2.1309922 0.5341246
-2.3301538 -2.1393800 0.5398307
-2.3256560 -2.0948073 0.5106335
-2.3288386 -2.1273799 0.5313299
-2.3322287 -2.1517714 0.5479729
-2.3325500 -1.9568421 0.4442660
-2.3268569 -2.1099023 0.5195395
-2.3345894 -2.1649815 0.5576261
-2.3313803 -2.1451436 0.5428703
-2.3363022 -2.1731796 0.5635791
-2.3257808 -2.0820284 0.5022619
-2.3256431 -2.0727416 0.4968512
-2.3262234 -2.0918564 0.5076748
-2.3302174 -1.9803432 0.4525179
-2.3288303 -1.9987873 0.4607549
-2.3256219 -2.0678188 0.4939557
-2.3267436 -2.1016370 0.5131325
-2.3260727 -2.0861394 0.5042751
-2.3288970 -2.1236611 0.5273678
-2.3356192 -2.1673153 0.5580349
-2.3326431 -1.9628638 0.4454846
-2.3273251 -2.1072624 0.5162458
-2.3284361 -2.1178187 0.5231596
-2.3303727 -2.1336824 0.5338934
-2.3300134 -2.1301494 0.5313666
-2.3345206 -2.1608137 0.5528116
-2.3270094 -2.0980547 0.5102947
-2.3315587 -2.1420139 0.5393280
-2.3429302 -1.9024424 0.4241623
-2.3398913 -1.9190583 0.4293940
-2.3336427 -2.1544285 0.5477787
-2.3388586 -2.1821609 0.5687352
-2.3375826 -2.1757730 0.5637177
-2.3327315 -2.1479684 0.5428424
-2.3314746 -2.1362722 0.5340827
-2.3348901 -1.9532550 0.4403417
-2.3315540 -1.9790514 0.4501649
-2.3286942 -2.1134402 0.5185620
-2.3368118 -2.1696886 0.5581106
-2.3357688 -2.1637994 0.5536156
-2.3301984 -2.1263918 0.5271007
-2.3403549 -2.1859618 0.5703698
-2.3327574 -2.1453684 0.5400933
-2.3277519 -2.0950671 0.5069818
-2.3298575 -2.1213958 0.5233811
-2.3349450 -1.9564834 0.4409308
-2.3339184 -2.1511310 0.5434668
-2.3343092 -1.9620899 0.4428482
-2.3278185 -2.0896942 0.5032908
-2.3414440 -1.9170851 0.4270853
-2.3272961 -2.0453174 0.4791025
-2.3284974 -2.1047416 0.5121428
-2.3289979 -2.1112088 0.5161305
-2.3276784 -2.0858370 0.5010618
-2.3390029 -2.1782084 0.5634471
-2.3274240 -2.0724584 0.4931820
-2.3368167 -2.1661608 0.5540025
-2.3298429 -2.1169289 0.5192029
-2.3277824 -2.0765753 0.4952332
-2.3286339 -2.1013217 0.5095394
-2.3380987 -2.1721540 0.5580996
-2.3327990 -2.1390295 0.5337909
-2.3401772 -1.9287070 0.4301425
-2.3343456 -1.9671628 0.4438502
-2.3277223 -2.0691562 0.4905323
-2.3314363 -2.1291928 0.5271137
-2.3309931 -2.1241333 0.5234498
-2.3341499 -2.1480636 0.5398710
-2.3294837 -2.1074251 0.5122791
-2.3350573 -2.1535204 0.5435214
-2.3403871 -2.1815394 0.5642259
-2.3379326 -2.1684224 0.5541813
-2.3292613 -2.0982284 0.5063091
-2.3429895 -1.9157681 0.4248802
-2.3330138 -2.1366168 0.5311887
-2.3392389 -2.1746371 0.5583663
-2.3310474 -2.1196614 0.5192837
-2.3367962 -2.1613759 0.5484762
-2.3339107 -2.1423596 0.5345773
-2.3294368 -2.0930127 0.5025094
-2.3325594 -2.1316516 0.5270884
-2.3330928 -1.9870035 0.4496276
-2.3284723 -2.0626644 0.4846789
-2.3294611 -2.0894402 0.5000357
-2.3415456 -2.1839127 0.5645826
-2.3322273 -2.1267498 0.5232823
-2.3390203 -2.1707981 0.5545528
-2.3363302 -2.1560310 0.5434671
-2.3303665 -2.1046632 0.5087525
-2.3354902 -2.1507609 0.5396493
-2.3294550 -2.0854913 0.4974899
-2.3292172 -2.0762592 0.4919994
-2.3294937 -2.0802665 0.4941088
-2.3403764 -2.1769154 0.5585318
-2.3380015 -2.1643603 0.5492830
-2.3310099 -2.1104965 0.5116958
-2.3339398 -1.9840617 0.4474827
-2.3292731 -2.0722988 0.4894277
-2.3314819 -2.1166228 0.5156048
-2.3322591 -2.1222831 0.5191012
-2.3343861 -2.1394187 0.5308586
-2.3306539 -2.1012243 0.5058003
-2.3305167 -2.0966881 0.5029704
-2.3375540 -2.1586313 0.5436189
-2.3366539 -2.1534021 0.5397757
-2.3389979 -2.1667249 0.5496683
-2.3402143 -2.1732377 0.5545871
-2.3467242 -1.9061476 0.4191748
-2.3436449 -1.9234214 0.4248491
-2.3378216 -1.9599089 0.4375015
-2.3315021 -2.1082926 0.5092640
-2.3336284 -2.1296940 0.5231677
-2.3432033 -2.1877865 0.5656126
-2.3360867 -2.1471997 0.5345982
-2.3310921 -2.0927322 0.4992584
-2.3314038 -2.0990641 0.5029479
-2.3312247 -2.0282498 0.4646170
-2.3334978 -2.1249163 0.5189136
-2.3400087 -2.1690436 0.5500935
-2.3385949 -2.1610877 0.5439187
-2.3312006 -2.0893389 0.4966508
-2.3357553 -2.1422184 0.5305312
-2.3413462 -2.1757318 0.5548481
-2.3325354 -2.1143033 0.5116801
-2.3308513 -2.0797768 0.4910296
-2.3425211 -2.1815690 0.5590877
-2.3331656 -2.1197356 0.5150131
-2.3306514 -2.0663811 0.4831859
-2.3379013 -2.1559134 0.5397393
-2.3321838 -2.1043172 0.5051981
-2.3451503 -1.9221073 0.4226153
-2.3328067 -2.0127860 0.4565465
-2.3314789 -2.0371106 0.4679904
-2.3313384 -2.0410839 0.4700208
-2.3308241 -2.0582282 0.4787379
-2.3309004 -2.0626598 0.4809194
-2.3355046 -2.1376067 0.5264545
-2.3349687 -2.1324124 0.5229120
-2.3409812 -2.1713288 0.5505502
-2.3436018 -2.1839650 0.5594322
-2.3323283 -2.0966180 0.4995429
-2.3376843 -2.1501993 0.5340930
-2.3425277 -2.1781493 0.5548860
-2.3462629 -1.9191297 0.4206504
-2.3317640 -2.0511510 0.4740424
-2.3337268 -2.1171225 0.5117028
-2.3402651 -2.1650859 0.5450787
-2.3332572 -2.1114087 0.5082690
-2.3389650 -2.1583892 0.5400274
-2.3327041 -2.1019314 0.5025255
-2.3343605 -2.1225430 0.5150302
-2.3370731 -2.1449591 0.5302524
-2.3420972 -2.1736233 0.5506987
-2.3333043 -2.0233518 0.4595509
-2.3329929 -2.0273626 0.4614697
-2.3323315 -2.0830252 0.4902643
-2.3336713 -2.1084017 0.5053302
-2.3447823 -2.1868853 0.5603141
-2.3325778 -2.0877878 0.4928923
-2.3364078 -2.1352241 0.5225757
-2.3330168 -2.0933830 0.4960341
-2.3371566 -2.1407345 0.5258310
-2.3401420 -2.1609430 0.5402406
-2.3324401 -2.0659795 0.4801300
-2.3437884 -2.1806272 0.5548671
-2.3333255 -2.0321001 0.4629541
-2.3390545 -2.1531476 0.5339501
-2.3325872 -2.0701569 0.4820451
-2.3367913 -1.9907257 0.4445787
-2.3326752 -2.0623113 0.4778151
-2.3326075 -2.0748652 0.4846558
-2.3362671 -2.1306493 0.5184817
-2.3336244 -2.0995406 0.4990640
-2.3339527 -2.1049573 0.5023611
-2.3351044 -2.1199143 0.5113718
-2.3346799 -2.1143618 0.5077890
-2.3332524 -2.0458894 0.4691494
-2.3357236 -2.1251260 0.5145294
-2.3347612 -2.0178765 0.4553994
-2.3332249 -2.0541874 0.4729469
-2.3345482 -2.0220855 0.4571392
-2.3338776 -2.0371224 0.4642195
-2.3334640 -2.0502915 0.4708650
-2.3376921 -2.1381460 0.5224709
-2.3448689 -2.1830960 0.5551507
-2.3337070 -2.0868559 0.4901733
-2.3373164 -2.1330500 0.5185021
-2.3415500 -2.1634906 0.5398514
-2.3353245 -2.1114286 0.5044213
-2.3403517 -2.1557548 0.5338012
-2.3347488 -2.1021955 0.4988172
-2.3337373 -2.0780236 0.4843830
-2.3342267 -2.0911744 0.4920514
-2.3409720 -1.9675873 0.4337897
-2.3336629 -2.0606112 0.4752419
-2.3388152 -2.1445141 0.5258832
-2.3394250 -2.1489538 0.5288504
-2.3368323 -2.1278083 0.5146513
-2.3359281 -2.1173154 0.5076966
-2.3349028 -2.0313836 0.4601719
-2.3365459 -2.1228171 0.5109443
-2.3354902 -2.1080982 0.5017175
-2.3460042 -2.1854466 0.5552557
-2.3341813 -2.0743932 0.4816076
-2.3483740 -1.9254734 0.4183476
-2.3371341 -2.0049181 0.4475859
-2.3343712 -2.0575299 0.4725238
-2.3342550 -2.0654366 0.4766946
-2.3450095 -2.1791612 0.5501151
-2.3341707 -2.0701283 0.4792916
-2.3427120 -2.1659788 0.5400999
-2.3403496 -2.1513937 0.5291735
-2.3363300 -2.0165609 0.4525934
-2.3391677 -2.1415623 0.5225037
-2.3350988 -2.0410699 0.4639211
-2.3385722 -2.1364208 0.5189068
-2.3415007 -2.1581873 0.5338155
-2.3358259 -2.1047950 0.4986403
-2.3351158 -2.0452408 0.4658081
-2.3355944 -2.0995706 0.4951902
-2.3385576 -1.9960767 0.4430729
-2.3383558 -1.9986708 0.4440622
-2.3352407 -2.0499481 0.4677651
-2.3350622 -2.0846908 0.4862066
-2.3352284 -2.0900874 0.4894588
-2.3351446 -2.0540128 0.4697189
-2.3373508 -2.1201691 0.5073112
-2.3369355 -2.1146433 0.5037168
-2.3352210 -2.0812337 0.4836508
-2.3378853 -2.1256337 0.5105901
-2.3438536 -2.1690162 0.5408616
-2.3359090 -2.0945491 0.4912268
-2.3412881 -2.1537825 0.5292141
-2.3425439 -2.1606638 0.5341002
-2.3445156 -1.9545230 0.4254441
-2.3370064 -2.0220880 0.4534120
-2.3364944 -2.0306337 0.4573668
-2.3464694 -2.1821764 0.5498654
-2.3367934 -2.0267138 0.4553533
-2.3371673 -2.1113964 0.5009619
-2.3357411 -2.0778101 0.4807223
-2.3398603 -2.1391915 0.5185999
-2.3406396 -2.1444717 0.5220789
-2.3358078 -2.0739252 0.4785317
-2.3367629 -2.0353388 0.4588513
-2.3358720 -2.0697660 0.4761683
-2.3449578 -2.1715277 0.5411103
-2.3471194 -1.9532945 0.4234088
-2.3380922 -2.0158671 0.4498034
-2.3360279 -2.0650856 0.4735864
-2.3395902 -2.1342519 0.5148354
-2.3368989 -2.1024848 0.4947244
-2.3368159 -2.0405127 0.4609629
-2.3367573 -2.0446343 0.4629298
-2.3391015 -2.1282925 0.5103745
-2.3382843 -2.1177486 0.5034790
-2.3380628 -2.0204682 0.4512886
-2.3367497 -2.0491950 0.4649348
-2.3387982 -2.1230567 0.5068986
-2.3430181 -2.1589171 0.5309077
-2.3368303 -2.0934067 0.4886754
-2.3438415 -2.1632314 0.5340106
-2.3391031 -2.0095187 0.4462874
-2.3367567 -2.0881792 0.4852790
-2.3367636 -2.0530702 0.4665977
-2.3421963 -2.1521625 0.5259099
-2.3494640 -2.1926943 0.5559424
-2.3368023 -2.0577102 0.4685877
-2.3410447 -2.1419417 0.5186563
-2.3368482 -2.0845941 0.4828347
-2.3435800 -1.9742804 0.4307087
-2.3406947 -2.0000836 0.4412466
-2.3385539 -2.0257409 0.4522892
-2.3385287 -2.1094068 0.4967946
-2.3420842 -2.1473736 0.5216605
-2.3408565 -2.1369557 0.5145877
-2.3442295 -2.1615058 0.5310910
-2.3389589 -2.1156348 0.5005849
-2.3464501 -2.1744090 0.5407152
-2.3452624 -2.1667071 0.5346440
-2.3401139 -2.1266051 0.5071251
-2.3447410 -1.9716387 0.4296066
-2.3383649 -2.0351016 0.4562283
-2.3375075 -2.0775042 0.4775236
-2.3374777 -2.0810511 0.4795577
-2.3394917 -2.0193488 0.4487971
-2.3434439 -2.1550242 0.5258550
-2.3397054 -2.1206264 0.5030705
-2.3383738 -2.0398121 0.4581530
-2.3375293 -2.0733362 0.4751631
-2.3484019 -1.9480852 0.4207301
-2.3419678 -1.9891979 0.4351538
-2.3406880 -2.0076212 0.4434615
-2.3513139 -2.1970742 0.5570054
-2.3384009 -2.0440739 0.4599496
-2.3423546 -2.1446706 0.5183894
-2.3389690 -2.0316693 0.4538124
-2.3384380 -2.0483372 0.4618044
-2.3383450 -2.0915112 0.4844818
-2.3385992 -2.0973543 0.4877468
-2.3388433 -2.1018256 0.4902282
-2.3477765 -1.9574081 0.4227905
-2.3407851 -2.0138561 0.4451799
-2.3488187 -2.1836443 0.5457180
-2.3504248 -2.1911219 0.5512960
-2.3420890 -2.1396736 0.5143255
-2.3398599 -2.0245473 0.4498294
-2.3383578 -2.0620127 0.4680555
-2.3386199 -2.0528613 0.4633865
-2.3444634 -2.1575528 0.5260977
-2.3385051 -2.0885429 0.4822571
-2.3455487 -2.1639540 0.5308018
-2.3466008 -2.1693681 0.5344527
-2.3386324 -2.0579556 0.4656330
-2.3405720 -2.1188310 0.4999112
-2.3414747 -2.1294325 0.5067643
-2.3401129 -2.1131889 0.4964072
-2.3410640 -2.1242069 0.5032662
-2.3471449 -1.9607458 0.4227631
-2.3388544 -2.0852404 0.4795854
-2.3482114 -2.1777363 0.5399077
-2.3403504 -2.0306361 0.4512201
-2.3466406 -2.1664197 0.5310780
-2.3391783 -2.0810701 0.4765162
-2.3392757 -2.0769382 0.4741469
-2.3519406 -2.1944361 0.5518094
-2.3400605 -2.0434660 0.4570794
-2.3434957 -1.9961007 0.4356447
-2.3405469 -2.1102956 0.4933558
-2.3429462 -2.1375101 0.5105935
-2.3434940 -2.1427462 0.5140943
-2.3502626 -2.1866681 0.5454560
-2.3401622 -2.0390293 0.4549202
-2.3477292 -2.1718078 0.5344647
-2.3456525 -2.1598915 0.5258779
-2.3399492 -2.0476003 0.4589573
-2.3397613 -2.0954244 0.4843106
-2.3401809 -2.1051435 0.4898148
-2.3392830 -2.0727680 0.4717367
-2.3423529 -2.0123873 0.4424474
-2.3399296 -2.0527041 0.4611787
-2.3493435 -2.1805971 0.5401407
-2.3423647 -2.1272497 0.5030839
-2.3400411 -2.0917994 0.4815243
-2.3415374 -2.1164263 0.4960665
-2.3429750 -2.1326624 0.5064147
-2.3409900 -2.0359527 0.4522743
-2.3420834 -2.1218175 0.4994123
-2.3401602 -2.0658477 0.4668786
-2.3478935 -2.1689660 0.5309912
-2.3403688 -2.0617406 0.4644411
-2.3469623 -2.1626557 0.5258892
-2.3404583 -2.0886289 0.4787390
-2.3468638 -1.9773731 0.4266583
-2.3406672 -2.0579995 0.4622209
-2.3441538 -2.1402336 0.5103214
-2.3410040 -2.1015611 0.4857936
-2.3411063 -2.0987963 0.4838616
-2.3505177 -2.1832418 0.5399651
-2.3407788 -2.0852982 0.4760939
-2.3416960 -2.1082373 0.4892256
-2.3421313 -2.1135254 0.4926462
-2.3453255 -1.9927262 0.4318890
-2.3409171 -2.0765172 0.4710673
-2.3497659 -2.1766108 0.5348501
-2.3426617 -2.1190298 0.4958821
-2.3408888 -2.0812737 0.4736224
-2.3468332 -2.1580364 0.5214969
-2.3413783 -2.0518636 0.4584153
-2.3505884 -1.9531043 0.4187414
-2.3479749 -1.9753178 0.4249984
-2.3417720 -2.0439105 0.4543954
-2.3461568 -2.1521575 0.5173001
-2.3455414 -2.1463154 0.5130842
-2.3443182 -2.1354768 0.5060644
-2.3480783 -2.1651698 0.5261418
-2.3434264 -2.1246884 0.4990121
-2.3544925 -2.1993844 0.5517884
-2.3415349 -2.0950481 0.4807629
-2.3425371 -2.0348691 0.4492599
-2.3494500 -2.1719113 0.5305368
-2.3526494 -1.9530230 0.4150336
-2.3465703 -1.9908841 0.4300736
-2.3441192 -2.0166057 0.4409103
-2.3454232 -2.1429315 0.5100797
-2.3531200 -2.1919301 0.5451242
-2.3479217 -2.1605828 0.5217263
-2.3455140 -2.0011496 0.4338692
-2.3419571 -2.0918727 0.4779821
-2.3424520 -2.1058254 0.4857459
-2.3428366 -2.0404324 0.4511217
-2.3420513 -2.0654316 0.4633254
-2.3431042 -2.1111765 0.4887529
-2.3520442 -2.1859725 0.5394106
-2.3455412 -2.1384165 0.5059486
-2.3492952 -2.1676988 0.5260684
-2.3435795 -2.1165413 0.4921107
-2.3463599 -1.9984660 0.4321567
-2.3422994 -2.0616458 0.4611339
-2.3426681 -2.1021326 0.4830475
-2.3512142 -2.1794825 0.5344636
-2.3447093 -2.1277767 0.4987758
-2.3425186 -2.0888298 0.4751356
-2.3443772 -2.1222603 0.4951866
-2.3428971 -2.0984359 0.4803047
-2.3508298 -2.1746577 0.5302641
-2.3426688 -2.0802436 0.4699247
-2.3481903 -2.1571055 0.5175590
-2.3548310 -2.1960077 0.5462382
-2.3427025 -2.0850035 0.4724921
-2.3475066 -2.1502945 0.5126118
-2.3430692 -2.0949880 0.4777410
-2.3438048 -2.1086620 0.4853765
-2.3534052 -2.1887609 0.5393759
-2.3505642 -2.1709403 0.5266306
-2.3443804 -2.1139643 0.4884089
-2.3447772 -2.1192778 0.4918099
-2.3473689 -2.1464167 0.5091443
-2.3468984 -2.1413032 0.5055336
-2.3440339 -2.0480843 0.4524638
-2.3440078 -2.1051747 0.4824769
-2.3527173 -2.1824100 0.5340247
-2.3445037 -2.0399368 0.4481391
-2.3445433 -2.0441981 0.4499421
-2.3458470 -2.1253245 0.4946092
-2.3461787 -2.1314212 0.4985402
-2.3503265 -1.9809957 0.4227579
-2.3472592 -2.0060835 0.4322836
-2.3443143 -2.0528152 0.4539268
-2.3467987 -2.1363566 0.5014391
-2.3523675 -2.1777227 0.5299944
-2.3438394 -2.0692256 0.4621352
-2.3439566 -2.0653505 0.4599946
-2.3441742 -2.0922793 0.4742369
-2.3448865 -2.1112265 0.4852272
-2.3547436 -2.1911973 0.5393878
-2.3508916 -2.1668819 0.5217096
-2.3445419 -2.1018660 0.4793974
-2.3570438 -2.2005726 0.5468468
-2.3442229 -2.0745758 0.4642399
-2.3491227 -1.9963326 0.4282261
-2.3538309 -2.1849903 0.5341971
-2.3445831 -2.0616729 0.4573057
-2.3493613 -2.1550453 0.5130514
-2.3445735 -2.0979650 0.4768037
-2.3481672 -2.1447379 0.5058777
-2.3445446 -2.0887447 0.4713551
-2.3488484 -2.1493042 0.5087386
-2.3458616 -2.1170136 0.4878467
-2.3444663 -2.0845716 0.4689483
-2.3452206 -2.1084174 0.4825196
-2.3506468 -2.1624525 0.5174638
-2.3527769 -2.1758738 0.5269107
-2.3562699 -2.1951163 0.5409190
-2.3582447 -2.2029705 0.5471331
-2.3471162 -2.1289440 0.4947495
-2.3489016 -2.0043202 0.4298692
-2.3521085 -2.1695840 0.5217920
-2.3482332 -2.1393627 0.5009172
-2.3551304 -2.1875384 0.5341228
-2.3455214 -2.0962419 0.4740260
-2.3461890 -2.0478902 0.4488158
-2.3465863 -2.0399945 0.4447411
-2.3461067 -2.0524722 0.4508343
-2.3493716 -2.1473365 0.5057254
-2.3464497 -2.1141238 0.4844112
-2.3508904 -2.1595812 0.5140240
-2.3454205 -2.0737087 0.4614427
-2.3455061 -2.0696979 0.4593713
-2.3502933 -2.1531013 0.5091041
-2.3577368 -2.1987213 0.5424671
-2.3540139 -2.1785042 0.5270557
-2.3465700 -2.0438421 0.4464128
-2.3460208 -2.1019100 0.4766459
-2.3463402 -2.1062275 0.4789173
-2.3462801 -2.0579047 0.4527841
-2.3521712 -2.1653521 0.5170368
-2.3460438 -2.0659596 0.4567574
-2.3459774 -2.0783431 0.4630587
-2.3482864 -2.1319681 0.4945722
-2.3553881 -2.1848723 0.5307951
-2.3533370 -2.1721655 0.5216700
-2.3467545 -2.1115696 0.4818681
-2.3562974 -2.1900743 0.5343449
-2.3495581 -2.1429359 0.5011302
-2.3464189 -2.0929967 0.4705212
-2.3463748 -2.0884394 0.4677411
-2.3478955 -2.0347832 0.4402622
-2.3508166 -2.1503990 0.5055039
-2.3523030 -2.1623716 0.5137015
-2.3553034 -2.1810855 0.5269351
-2.3564159 -2.1877655 0.5316838
-2.3479059 -2.1179353 0.4843937
-2.3597000 -2.2029588 0.5434254
-2.3546175 -2.1747736 0.5215243
-2.3519084 -2.1560445 0.5083094
-2.3482297 -2.0433394 0.4434351
-2.3536472 -2.1680347 0.5165007
-2.3481712 -2.0478207 0.4455119
-2.3479749 -2.1094900 0.4781880
-2.3479628 -2.0526872 0.4478472
-2.3509225 -2.1457244 0.5008102
-2.3584009 -2.1952144 0.5357239
-2.3474417 -2.0777746 0.4600427
-2.3608309 -2.2053084 0.5437956
-2.3476055 -2.0695429 0.4557137
-2.3564076 -2.1834760 0.5269903
-2.3509059 -2.0104919 0.4276924
-2.3481362 -2.0572229 0.4494723
-2.3476557 -2.0820574 0.4619110
-2.3521303 -2.1531493 0.5052170
-2.3576770 -2.1902837 0.5316423
-2.3546136 -2.1704756 0.5168238
-2.3539052 -2.1653602 0.5131984
-2.3480326 -2.0965772 0.4694896
-2.3557752 -2.1771879 0.5215569
-2.3532465 -2.1589620 0.5082055
-2.3496447 -2.0339026 0.4371049
-2.3485749 -2.0621053 0.4508357
-2.3487345 -2.1065851 0.4747814
-2.3483020 -2.0923469 0.4664599
-2.3574726 -2.1859455 0.5272828
-2.3521369 -2.1485130 0.5008337
-2.3587359 -2.1926767 0.5320012
-2.3499135 -2.0385333 0.4386715
-2.3567133 -2.1795232 0.5219737
-2.3558961 -1.9794244 0.4136271
-2.3499155 -2.0427624 0.4404902
-2.3494466 -2.1124516 0.4772862
-2.3559185 -2.1730905 0.5166713
-2.3535925 -2.1560644 0.5047863
-2.3500291 -2.0472376 0.4421542
-2.3598196 -2.1950671 0.5323570
-2.3553977 -2.1682701 0.5127768
-2.3492554 -2.0863679 0.4614029
-2.3512784 -2.0286115 0.4328298
-2.3493193 -2.0903107 0.4635333
-2.3520145 -2.1390668 0.4925878
-2.3546723 -2.1617732 0.5078676
-2.3587621 -2.1884871 0.5272003
-2.3500537 -2.0523744 0.4442964
-2.3495425 -2.1001329 0.4689042
-2.3500389 -2.0571111 0.4461830
-2.3614958 -2.2011059 0.5364023
-2.3501703 -2.1096474 0.4742116
-2.3494209 -2.0824191 0.4588609
-2.3535595 -2.1514146 0.5004113
-2.3502132 -2.0616282 0.4478261
-2.3571269 -1.9781431 0.4111920
-2.3558318 -1.9887149 0.4152655
-2.3547479 -1.9959946 0.4178536
-2.3503440 -2.1062802 0.4715715
-2.3514162 -2.1250938 0.4827677
-2.3624069 -2.2038007 0.5377767
-2.3572374 -2.1758465 0.5167048
-2.3584933 -2.1839134 0.5227713
-2.3609696 -2.1973311 0.5325349
-2.3514434 -2.0376916 0.4359409
-2.3527053 -2.0221777 0.4290055
-2.3549160 -2.1588289 0.5044880
-2.3536213 -2.1467720 0.4960399
-2.3600516 -2.1909654 0.5271597
-2.3502690 -2.0967804 0.4654701
-2.3568232 -2.1710778 0.5124484
-2.3546664 -2.0042381 0.4205102
-2.3517300 -2.0424148 0.4374157
-2.3527707 -2.1365186 0.4888669
-2.3546714 -2.1541096 0.5005157
-2.3533183 -2.1418208 0.4922908
-2.3514599 -2.0471980 0.4398079
-2.3594640 -2.1862784 0.5231598
-2.3508276 -2.0939433 0.4628829
-2.3512003 -2.1035288 0.4680543
-2.3509237 -2.0899099 0.4604214
-2.3560352 -2.1615059 0.5045997
-2.3525819 -2.0362558 0.4336667
-2.3525318 -2.1278414 0.4824343
-2.3534714 -2.1395800 0.4898591
-2.3588796 -2.1802502 0.5177813
-2.3611431 -2.1933951 0.5274825
-2.3529021 -2.0322825 0.4317184
-2.3517514 -2.1137097 0.4739462
-2.3642999 -2.2078304 0.5386265
-2.3511648 -2.0861495 0.4577162
-2.3549827 -2.1501721 0.4964235
-2.3519981 -2.0565680 0.4427650
-2.3581852 -2.1739388 0.5123896
-2.3558126 -2.1566981 0.5003690
-2.3543317 -2.0214441 0.4261981
-2.3539515 -2.0260354 0.4281264
-2.3515283 -2.0785683 0.4532855
-2.3535376 -2.1347176 0.4856971
-2.3606671 -2.1887068 0.5231837
-2.3546560 -2.1453019 0.4925922
-2.3582476 -1.9852965 0.4111960
-2.3522242 -2.0621649 0.4446223
-2.3523159 -2.1098368 0.4701739
-2.3623191 -2.1957656 0.5275801
-2.3522081 -2.0663471 0.4464873
-2.3520260 -2.1004102 0.4644214
-2.3655611 -2.2102001 0.5387117
-2.3623867 -1.9628872 0.4026596
-2.3565646 -2.0033016 0.4174308
-2.3541895 -2.0309709 0.4293737
-2.3532818 -2.1206018 0.4760363
-2.3534857 -2.1259612 0.4793518
-2.3574645 -2.1649701 0.5049377
-2.3593941 -2.1771955 0.5132314
-2.3535081 -2.0424439 0.4345755
-2.3561124 -2.1529085 0.4964923
-2.3563551 -2.0090701 0.4194195
-2.3569324 -2.1592157 0.5002928
-2.3558996 -2.1481715 0.4925445
-2.3525784 -2.0934773 0.4594106
-2.3526583 -2.0973864 0.4615740
-2.3534751 -2.1170876 0.4731219
-2.3610525 -1.9738476 0.4052052
-2.3580666 -1.9950352 0.4130527
-2.3543204 -2.0366335 0.4310551
-2.3531114 -2.1079556 0.4675071
-2.3547566 -2.1374304 0.4854239
-2.3588792 -2.1716668 0.5083907
-2.3611083 -2.1851381 0.5180995
-2.3597616 -1.9840854 0.4089540
-2.3635092 -2.1981270 0.5276692
-2.3650659 -2.2047777 0.5324562
-2.3541785 -2.1230107 0.4759750
-2.3528968 -2.0897267 0.4566840
-2.3537199 -2.1137141 0.4700748
-2.3639821 -1.9615616 0.4004979
-2.3591500 -1.9920573 0.4110682
-2.3606497 -2.1797476 0.5131351
-2.3547331 -2.1288567 0.4789137
-2.3531565 -2.0858820 0.4540963
-2.3573885 -2.1556429 0.4962177
-2.3562680 -2.1453009 0.4890840
-2.3536913 -2.1037925 0.4635911
-2.3560932 -2.0255718 0.4246791
-2.3633788 -2.1940289 0.5230829
-2.3579374 -2.0072375 0.4166365
-2.3540458 -2.0614711 0.4413099
-2.3646854 -2.2006234 0.5279233
-2.3572392 -2.1509466 0.4922336
-2.3536874 -2.0825358 0.4515335
-2.3625543 -2.1885150 0.5185382
-2.3686074 -1.9393154 0.3924881
-2.3679314 -1.9432953 0.3937348
-2.3611188 -1.9831190 0.4069321
-2.3587610 -2.0003461 0.4135039
-2.3538179 -2.0786080 0.4494461
-2.3559661 -2.1401511 0.4851484
-2.3593786 -2.1684586 0.5039830
-2.3602830 -2.1750882 0.5087808
-2.3552073 -2.1258389 0.4759803
-2.3667638 -2.2088630 0.5338301
-2.3540023 -2.0745206 0.4470315
-2.3541117 -2.0705750 0.4449577
-2.3556739 -2.1312283 0.4789160
-2.3645390 -2.1965075 0.5233562
-2.3588978 -2.0053044 0.4146848
-2.3546751 -2.0671058 0.4425574
-2.3544860 -2.1010953 0.4604575
-2.3547408 -2.1110966 0.4664487
-2.3553780 -2.1207104 0.4720911
-2.3562767 -2.1356474 0.4810725
-2.3619925 -2.1824194 0.5129307
-2.3586039 -2.1585293 0.4961462
-2.3555866 -2.0468530 0.4329370
-2.3543779 -2.0968703 0.4581128
-2.3552280 -2.1168811 0.4694177
-2.3583673 -2.0136065 0.4176784
-2.3545212 -2.0931968 0.4557651
-2.3565983 -2.0354392 0.4271923
-2.3577167 -2.1482058 0.4886609
-2.3605502 -2.1709712 0.5039169
-2.3548396 -2.0897084 0.4533195
-2.3648358 -1.9685526 0.4004900
-2.3559339 -2.0517219 0.4342850
-2.3585356 -2.1536833 0.4919564
-2.3639755 -2.1911807 0.5183404
-2.3669004 -2.2057542 0.5293202
-2.3552512 -2.1070258 0.4628595
-2.3617826 -2.1779224 0.5084287
-2.3552947 -2.0820414 0.4485226
-2.3569840 -2.1340955 0.4785027
-2.3567521 -2.1290550 0.4752637
-2.3634988 -1.9795166 0.4030358
-2.3619797 -1.9901186 0.4069452
-2.3577544 -2.0304349 0.4236464
-2.3555242 -2.0782818 0.4462995
-2.3565486 -2.1234347 0.4717866
-2.3689760 -2.2134129 0.5344493
-2.3599824 -2.1613665 0.4957771
-2.3559485 -2.1139515 0.4660231
-2.3555784 -2.0864042 0.4503318
-2.3576115 -2.1385142 0.4806586
-2.3616886 -2.1735743 0.5040955
-2.3569173 -2.0458122 0.4303337
-2.3661553 -1.9665550 0.3984182
-2.3558935 -2.0698194 0.4417017
-2.3680866 -2.2081394 0.5296599
-2.3560931 -2.0658550 0.4396765
-2.3567963 -2.1203266 0.4689223
-2.3591175 -2.1510731 0.4882687
-2.3615738 -1.9977365 0.4088913
-2.3607209 -2.0050675 0.4120344
-2.3593654 -2.0194844 0.4177691
-2.3561059 -2.0747164 0.4434853
-2.3586462 -2.1459346 0.4846802
-2.3669856 -2.2020831 0.5243314
-2.3629965 -2.1804804 0.5083290
-2.3600877 -2.0123745 0.4148289
-2.3560739 -2.1011609 0.4576569
-2.3560672 -2.0973776 0.4553777
-2.3565991 -2.1111457 0.4629413
-2.3649283 -2.1892836 0.5139942
-2.3576551 -2.1260875 0.4715398
-2.3628156 -2.1760246 0.5040884
-2.3571378 -2.1169798 0.4658674
-2.3723378 -1.9350483 0.3863496
-2.3650738 -1.9781941 0.4008580
-2.3634643 -1.9888026 0.4046956
-2.3662642 -2.1960403 0.5186843
-2.3695425 -2.2121364 0.5311283
-2.3575241 -2.0516891 0.4315005
-2.3588536 -2.1415385 0.4804763
-2.3581785 -2.1320844 0.4747252
-2.3609691 -2.0103067 0.4130681
-2.3565043 -2.0937752 0.4525604
-2.3682089 -2.2044416 0.5244203
-2.3598217 -2.1487250 0.4847085
-2.3604312 -2.1540276 0.4881487
-2.3677327 -1.9658934 0.3959845
-2.3714243 -1.9459866 0.3895626
-2.3644130 -1.9865102 0.4030878
-2.3630224 -1.9964255 0.4066147
-2.3588313 -2.0406634 0.4254538
-2.3570538 -2.0814121 0.4451500
-2.3572319 -2.0906961 0.4498122
-2.3571548 -2.0863529 0.4475471
-2.3574622 -2.0778849 0.4427425
-2.3651067 -2.1853658 0.5089492
-2.3580318 -2.1145131 0.4625049
-2.3588307 -2.1290849 0.4713894
-2.3583528 -2.0573455 0.4322789
-2.3622374 -2.1650891 0.4942832
-2.3663455 -2.1918102 0.5136225
-2.3641572 -2.1786759 0.5039012
-2.3581015 -2.0659103 0.4362505
-2.3576924 -2.0746014 0.4407681
-2.3586145 -2.1236433 0.4677367
-2.3580564 -2.0700715 0.4381246
-2.3694637 -2.2068260 0.5245142
-2.3579855 -2.1049170 0.4565192
-2.3594587 -2.1349334 0.4743204
-2.3585282 -2.1200221 0.4652931
-2.3590308 -2.0509315 0.4286690
-2.3611877 -2.0245965 0.4165341
-2.3611812 -2.1515156 0.4843821
-2.3623216 -2.1620499 0.4913266
-2.3682819 -1.9717297 0.3964610
-2.3580375 -2.0972321 0.4516343
-2.3644954 -1.9951104 0.4043566
-2.3604178 -2.0353861 0.4211439
-2.3595624 -2.0472453 0.4264958
-2.3602344 -2.1407957 0.4772599
-2.3638224 -2.1725221 0.4983517
-2.3618819 -2.1569768 0.4876819
-2.3674890 -2.1943753 0.5138226
-2.3704586 -2.2091077 0.5249641
-2.3664684 -2.1880029 0.5087761
-2.3622086 -2.0176136 0.4129917
-2.3586039 -2.0856975 0.4446475
-2.3586961 -2.0818219 0.4424865
-2.3655486 -2.1814065 0.5036429
-2.3596210 -2.0562266 0.4296788
-2.3614078 -2.1469516 0.4799554
-2.3588457 -2.0942321 0.4488239
-2.3588844 -2.0903141 0.4466982
-2.3602785 -2.1329091 0.4713552
-2.3639739 -2.1689263 0.4942879
-2.3686096 -2.1968120 0.5141368
-2.3600574 -2.1232003 0.4646278
-2.3625782 -2.1543471 0.4840216
-2.3675782 -2.1904852 0.5090526
-2.3673456 -1.9838786 0.3985606
-2.3653704 -2.1767393 0.4992759
-2.3593856 -2.1043824 0.4534888
-2.3698166 -1.9706292 0.3941311
-2.3615938 -2.1444028 0.4774302
-2.3633412 -2.1606259 0.4878334
-2.3638690 -2.1650871 0.4907864
-2.3637082 -2.0156274 0.4102348
-2.3598580 -2.0748830 0.4372069
-2.3722849 -2.2133725 0.5258992
-2.3630688 -2.0238093 0.4133029
-2.3651021 -2.1714959 0.4945001
-2.3752931 -1.9417098 0.3835308
-2.3614117 -2.0469002 0.4234421
-2.3708328 -2.2053784 0.5194521
-2.3606130 -2.0617298 0.4301296
-2.3627758 -2.1497326 0.4796387
-2.3604171 -2.1146992 0.4581056
-2.3610326 -2.0553416 0.4270034
-2.3697837 -2.1992132 0.5142107
-2.3621066 -2.0402421 0.4201299
-2.3664719 -2.1793323 0.4994633
-2.3613806 -2.0514123 0.4250122
-2.3686676 -2.1928242 0.5091779
-2.3618512 -2.1361391 0.4706468
-2.3672591 -1.9931796 0.4001877
-2.3660545 -2.0030616 0.4038397
-2.3632972 -2.0288316 0.4144574
-2.3734207 -2.2157990 0.5261747
-2.3604301 -2.0977767 0.4478187
-2.3718996 -2.2077380 0.5198322
-2.3640464 -2.1580427 0.4841286
-2.3652731 -2.1685558 0.4911093
-2.3629943 -2.1472875 0.4770195
-2.3682299 -2.1880439 0.5049380
-2.3647735 -2.1635395 0.4874010
-2.3607999 -2.0939856 0.4451761
-2.3615615 -2.0604917 0.4280770
-2.3639232 -2.1532023 0.4802950
-2.3851597 -1.8997760 0.3694944
-2.3845608 -1.9024437 0.3702187
-2.3820380 -1.9144480 0.3736242
-2.3769453 -1.9397270 0.3812863
-2.3718154 -1.9696091 0.3911757
-2.3668741 -2.0007984 0.4021519
-2.3626342 -2.0456357 0.4210232
-2.3616572 -2.1222585 0.4607687
-2.3644337 -2.0225944 0.4108823
-2.3668549 -2.1760653 0.4954304
-2.3612627 -2.1082112 0.4522700
-2.3699605 -2.1953404 0.5091188
-2.3678158 -2.1820238 0.4992393
-2.3614830 -2.0739666 0.4340639
-2.3730043 -2.2100278 0.5199910
-2.3618354 -2.1186407 0.4579401
-2.3695079 -2.1907039 0.5050373
-2.3656917 -2.0163316 0.4073879
-2.3640929 -2.0354009 0.4155403
-2.3637934 -2.0387012 0.4169608
-2.3619339 -2.0703150 0.4318052
-2.3628916 -2.1337340 0.4668167
-2.3748463 -2.2184335 0.5260070
-2.3621053 -2.0664568 0.4296656
-2.3659812 -2.1663507 0.4874010
-2.3630968 -2.0508851 0.4220318
-2.3643421 -2.1500829 0.4766909
-2.3635319 -2.1394210 0.4699021
-2.3667708 -2.1713879 0.4907595
-2.3678382 -2.1783140 0.4956189
-2.3655578 -2.1610367 0.4836261
-2.3650778 -2.0283416 0.4115418
-2.3651896 -2.1559341 0.4800151
-2.3620622 -2.1020803 0.4473271
-2.3708819 -1.9822404 0.3934461
-2.3638947 -2.0443620 0.4186261
-2.3631695 -2.0554929 0.4235448
-2.3725861 -2.2044811 0.5141407
-2.3711770 -2.1977555 0.5091544
-2.3658015 -2.0213705 0.4084733
-2.3629974 -2.0596467 0.4253706
-2.3631259 -2.1254381 0.4600920
-2.3677634 -2.1740028 0.4912613
-2.3624513 -2.0976828 0.4440402
-2.3630861 -2.0649622 0.4274078
-2.3639474 -2.1363306 0.4666218
-2.3631567 -2.1218916 0.4575978
-2.3709457 -2.1940931 0.5054674
-2.3625586 -2.0906922 0.4401981
-2.3629426 -2.1161611 0.4542035
-2.3648904 -2.1459826 0.4722435
-2.3671405 -2.1688660 0.4873257
-2.3695403 -2.1850157 0.4987450
-2.3688602 -2.1806496 0.4957165
-2.3655839 -2.1529500 0.4766586
-2.3722188 -2.2000902 0.5095643
-2.3670001 -2.1641675 0.4833499
-2.3664992 -2.1589104 0.4798803
-2.3780511 -1.9483893 0.3805653
-2.3735052 -1.9749450 0.3895881
-2.3684099 -2.0087553 0.4016232
-2.3635033 -2.0739629 0.4306972
-2.3633454 -2.0779409 0.4327228
-2.3632268 -2.1087587 0.4491085
-2.3632891 -2.1126784 0.4512662
-2.3637349 -2.0701155 0.4285670
-2.3744287 -2.2087183 0.5150879
-2.3653555 -2.1428623 0.4690195
-2.3699118 -2.1831447 0.4959919
-2.3688933 -2.1762859 0.4910861
-2.3667066 -2.0279889 0.4089700
-2.3682750 -2.1712880 0.4873379
-2.3733604 -2.2023826 0.5097143
-2.3723737 -2.1967919 0.5052407
-2.3840814 -1.9207934 0.3712666
-2.3702883 -1.9991507 0.3969315
-2.3660776 -2.0394404 0.4136254
-2.3638856 -2.0840386 0.4346876
-2.3637619 -2.1057109 0.4462652
-2.3646199 -2.1285447 0.4594716
-2.3649603 -2.0550651 0.4204904
-2.3654590 -2.1396580 0.4662134
-2.3657779 -2.0435874 0.4153972
-2.3678431 -2.0211734 0.4053849
-2.3668750 -2.1557045 0.4763580
-2.3714102 -2.1897096 0.4995558
-2.3792280 -1.9463349 0.3788092
-2.3639639 -2.1018496 0.4436530
-2.3699244 -2.1788098 0.4913239
-2.3667730 -2.1508347 0.4725609
-2.3671049 -2.0332257 0.4099819
-2.3858809 -1.9157865 0.3691072
-2.3641701 -2.0982641 0.4412354
-2.3647263 -2.1197311 0.4532099
-2.3648632 -2.1251072 0.4564826
-2.3655670 -2.1361926 0.4632483
-2.3679569 -2.1618781 0.4793958
-2.3649414 -2.0689372 0.4260675
-2.3723138 -2.1926626 0.5006912
-2.3645965 -2.1122073 0.4486018
-2.3695369 -2.1739103 0.4871735
-2.3668380 -2.1466123 0.4690592
-2.3764433 -2.2132761 0.5157139
-2.3736914 -2.1993609 0.5051341
-2.3858885 -1.9187832 0.3691251
-2.3811415 -1.9420914 0.3760151
-2.3807100 -1.9447462 0.3768692
-2.3673339 -2.0381670 0.4112233
-2.3664881 -2.0493284 0.4160733
-2.3647564 -2.0946946 0.4384242
-2.3752851 -2.2069697 0.5106095
-2.3680833 -2.1585587 0.4763324
-2.3709928 -2.1811683 0.4913996
-2.3654604 -2.0739439 0.4273282
-2.3762913 -2.2103323 0.5126899
-2.3734143 -2.1950225 0.5007753
-2.3657754 -2.1223469 0.4529783
-2.3705388 -2.1764236 0.4874370
-2.3890068 -1.9084390 0.3656160
-2.3883385 -1.9111072 0.3662819
-2.3736073 -1.9889187 0.3904524
-2.3695411 -2.0200277 0.4024379
-2.3655257 -2.0831985 0.4314783
-2.3725458 -2.1885366 0.4958368
-2.3775860 -2.2163615 0.5167267
-2.3787393 -2.2220863 0.5210597
-2.3666206 -2.0549928 0.4177545
-2.3703351 -2.0134363 0.3996879
-2.3654291 -2.1054561 0.4430246
-2.3672425 -2.1428487 0.4651586
-2.3699031 -2.1699113 0.4825629
-2.3663887 -2.1284801 0.4560567
-2.3683152 -2.1536548 0.4718442
-2.3679407 -2.1492018 0.4688922
-2.3743300 -1.9863169 0.3890285
-2.3658668 -2.0878090 0.4330739
-2.3688851 -2.0327557 0.4070429
-2.3674149 -2.1396863 0.4623273
-2.3658640 -2.1018546 0.4402153
-2.3677482 -2.0480549 0.4136760
-2.3669526 -2.0599003 0.4190647
-2.3671415 -2.1343987 0.4589314
-2.3745367 -2.1975287 0.5010305
-2.3663371 -2.1157399 0.4476398
-2.3665021 -2.1193756 0.4496448
-2.3775240 -2.2128340 0.5126494
-2.3714192 -2.0116707 0.3977064
-2.3736020 -2.1908577 0.4959521
-2.3695407 -2.1613077 0.4756800
-2.3688873 -2.1517115 0.4691705
-2.3700263 -2.0264979 0.4034931
-2.3670541 -2.1252420 0.4525422
-2.3725148 -2.0048555 0.3946265
-2.3671160 -2.0687863 0.4223817
-2.3665379 -2.0944313 0.4352306
-2.3695835 -2.1572809 0.4723714
-2.3712165 -2.1726175 0.4823100
-2.3670663 -2.0729194 0.4242840
-2.3686082 -2.1467693 0.4654226
-2.3709497 -2.1678159 0.4784309
-2.3670871 -2.1088995 0.4421345
-2.3679542 -2.1316529 0.4553847
-2.3745267 -2.1931351 0.4961303
-2.3818696 -1.9527432 0.3760589
-2.3702834 -2.0315972 0.4045819
-2.3670936 -2.1124406 0.4441602
-2.3735202 -2.1865494 0.4912772
-2.3758093 -2.2000784 0.5009407
-2.3674066 -2.0784701 0.4261750
-2.3685490 -2.0543361 0.4144895
-2.3708092 -2.1649817 0.4761626
-2.3677219 -2.1224684 0.4494404
-2.3700496 -2.1545360 0.4691701
-2.3674643 -2.0868586 0.4299636
-2.3802455 -2.2216340 0.5166679
-2.3729652 -2.1815761 0.4871936
-2.3790870 -2.2156391 0.5122996
-2.3691684 -2.1438189 0.4620446
-2.3675955 -2.0915280 0.4319413
-2.3682863 -2.1290970 0.4528574
-2.3713998 -2.0252864 0.4010733
-2.3675730 -2.1054456 0.4391970
-2.3884826 -1.9224624 0.3660072
-2.3879339 -1.9251301 0.3667736
-2.3739956 -2.0035392 0.3923711
-2.3721435 -2.0187368 0.3982479
-2.3698202 -2.0438495 0.4091125
-2.3726442 -2.1761256 0.4825955
-2.3709656 -2.1601768 0.4719481
-2.3682072 -2.1194288 0.4465474
-2.3699532 -2.1496253 0.4650304
-2.3723605 -2.1706720 0.4780414
-2.3898559 -1.9194897 0.3642689
-2.3834422 -1.9514255 0.3738798
-2.3779833 -1.9813335 0.3835193
-2.3692877 -2.0599316 0.4152537
-2.3740584 -2.1840960 0.4874521
-2.3749999 -2.1895709 0.4910542
-2.3771622 -2.2026682 0.5008135
-2.3681265 -2.1019545 0.4363060
-2.3813985 -2.2239321 0.5168189
-2.3710483 -2.0378789 0.4053680
-2.3682889 -2.0981440 0.4341088
-2.3693811 -2.1354382 0.4553760
-2.3722152 -2.1678226 0.4757969
-2.3764921 -2.1979297 0.4968489
-2.3688703 -2.0776933 0.4234053
-2.3686004 -2.1164436 0.4439479
-2.3708489 -2.1520906 0.4653415
-2.3691039 -2.1262738 0.4493778
-2.3686954 -2.1131486 0.4416918
-2.3716203 -2.1576286 0.4685790
-2.3910604 -1.9171508 0.3628380
-2.3706439 -2.0497208 0.4097034
-2.3695877 -2.0655554 0.4170478
-2.3694688 -2.0700696 0.4191265
-2.3692451 -2.0740594 0.4211079
-2.3689629 -2.0864744 0.4273210
-2.3808598 -2.2192530 0.5125262
-2.3723328 -2.0314674 0.4014140
-2.3722347 -2.1631431 0.4718217
-2.3707553 -2.1470186 0.4613554
-2.3698325 -2.1322567 0.4521964
-2.3690279 -2.0956417 0.4315642
-2.3693411 -2.0825205 0.4248290
-2.3771389 -1.9929922 0.3860983
-2.3742373 -2.1791823 0.4820408
-2.3691385 -2.1087905 0.4383519
-2.3692536 -2.0906464 0.4287841
-2.3706010 -2.1416640 0.4576261
-2.3922456 -1.9148127 0.3613914
-2.3778835 -1.9899678 0.3846568
-2.3737970 -2.1742409 0.4782699
-2.3765347 -2.1937921 0.4920010
-2.3697066 -2.1230749 0.4462197
-2.3778941 -2.2006037 0.4966444
-2.3735562 -2.1706294 0.4754566
-2.3708299 -2.1385071 0.4548014
-2.3726743 -2.0371123 0.4025994
-2.3734003 -2.0298601 0.3992720
-2.3697545 -2.1062306 0.4358386
-2.3758312 -2.0081989 0.3904169
-2.3704417 -2.1292437 0.4488622
-2.3699221 -2.1025028 0.4335537
-2.3702270 -2.1198300 0.4431071
-2.3710459 -2.0647056 0.4143541
-2.3736385 -2.1660418 0.4713989
-2.3731388 -2.1607648 0.4679425
-2.3721433 -2.1499517 0.4608988
-2.3729315 -2.1572059 0.4654385
-2.3709726 -2.0731492 0.4179841
-2.3798076 -1.9860013 0.3815658
-2.3746283 -2.0237298 0.3956305
-2.3711894 -2.0691956 0.4159600
-2.3720230 -2.1449485 0.4572433
-2.3802710 -2.2097795 0.5016487
-2.3713455 -2.1354198 0.4515273
-2.3758155 -2.1821966 0.4815244
-2.3704796 -2.0988885 0.4307789
-2.3706159 -2.1165729 0.4404019
-2.3705091 -2.1126983 0.4381898
-2.3709820 -2.1259751 0.4457582
-2.3707259 -2.0898785 0.4259614
-2.3752309 -2.1771153 0.4778821
-2.3709095 -2.0815333 0.4217401
-2.3793664 -2.2034605 0.4962513
-2.3749581 -2.1734789 0.4750830
-2.3712264 -2.0864347 0.4235517
-2.3709692 -2.0951324 0.4281229
-2.3814540 -1.9790577 0.3782481
-2.3726319 -2.0550288 0.4083439
-2.3774615 -2.1909623 0.4869247
-2.3836175 -2.2245732 0.5121583
-2.3724607 -2.0579596 0.4096335
-2.3717971 -2.1324569 0.4485431
-2.3725111 -2.1418460 0.4539906
-2.3750146 -2.1688907 0.4710193
-2.3729522 -2.1473726 0.4571989
-2.3733757 -2.1526772 0.4606178
-2.3717029 -2.1232684 0.4426220
-2.3770761 -2.1850271 0.4814902
-2.3714303 -2.1097604 0.4348733
-2.3746302 -2.1638298 0.4673702
-2.3816202 -2.2123711 0.5015208
-2.3924849 -1.9261652 0.3611909
-2.3759977 -2.0224318 0.3933001
-2.3746691 -2.0369313 0.3994542
-2.3783907 -2.1933645 0.4872666
-2.3726850 -2.0636271 0.4113564
-2.3765271 -2.1800088 0.4778096
-2.3721817 -2.1290609 0.4455559
-2.3722270 -2.0808917 0.4193036
-2.3727910 -2.0686013 0.4130575
-2.3729102 -2.1386428 0.4508106
-2.3746868 -2.1604897 0.4643133
-2.3725753 -2.0772083 0.4170007
-2.3764289 -2.1764082 0.4746415
-2.3936456 -1.9238290 0.3597253
-2.3818489 -1.9850321 0.3785837
-2.3773239 -2.0161599 0.3898530
-2.3727635 -2.0728426 0.4148546
-2.3720265 -2.1063190 0.4319405
-2.3810586 -2.2071080 0.4964444
-2.3748400 -2.0419238 0.4006108
-2.3721053 -2.1024010 0.4298216
-2.3721701 -2.1161845 0.4372618
-2.3723183 -2.1200909 0.4394470
-2.3872694 -1.9564167 0.3694196
-2.3754068 -2.0348156 0.3976221
-2.3856243 -2.2290383 0.5131379
-2.3762055 -2.1717886 0.4709425
-2.3723479 -2.0942783 0.4253584
-2.3742163 -2.0538244 0.4054405
-2.3828355 -2.2148707 0.5014811
-2.3727123 -2.0861856 0.4209397
-2.3733479 -2.1356256 0.4478908
-2.3777608 -2.1828089 0.4778063
-2.3731176 -2.1265677 0.4422332
-2.3807069 -1.9966387 0.3817395
-2.3728341 -2.0908760 0.4228972
-2.3784525 -2.1878315 0.4811596
-2.3765672 -2.0290689 0.3942170
-2.3726975 -2.0988364 0.4270072
-2.3741111 -2.1451261 0.4532349
-2.3744601 -2.1504601 0.4566061
-2.3797721 -2.1960497 0.4870500
-2.3761361 -2.1668364 0.4668548
-2.3742145 -2.0627751 0.4086348
-2.3736866 -2.1322098 0.4449160
-2.3886947 -1.9543175 0.3672588
-2.3777911 -2.1793855 0.4744933
-2.3754672 -2.0484864 0.4016254
-2.3794587 -2.1915464 0.4828707
-2.3813364 -2.2032205 0.4913651
-2.3839293 -2.2173009 0.5017989
-2.3743569 -2.0678921 0.4102602
-2.3745101 -2.1418941 0.4500866
-2.3742984 -2.0721337 0.4119911
-2.3764628 -2.1645992 0.4640626
-2.3742312 -2.0762830 0.4139211
-2.3764789 -2.0407811 0.3976535
-2.3775695 -2.1743953 0.4704353
-2.3811107 -2.1987786 0.4871076
-2.3756849 -2.1534482 0.4564668
-2.3740050 -2.1235576 0.4385362
-2.3791066 -2.1855566 0.4775230
-2.3837272 -1.9853826 0.3760653
-2.3825993 -1.9926752 0.3786235
-2.3756411 -2.0528580 0.4027961
-2.3864262 -2.2273830 0.5085779
-2.3737928 -2.1099820 0.4308688
-2.3738172 -2.1060547 0.4287466
-2.3834430 -2.2120945 0.4966507
-2.3740084 -2.1199102 0.4361356
-2.3748250 -2.1388393 0.4471818
-2.3741463 -2.0854194 0.4181051
-2.3804881 -2.1940245 0.4831605
-2.3746341 -2.1297964 0.4415147
-2.3776057 -2.1705297 0.4669638
-2.3743177 -2.0901440 0.4200429
-2.3742249 -2.0982156 0.4240978
-2.3782996 -2.0278976 0.3913140
-2.3979777 -1.9158702 0.3539244
-2.3848104 -1.9824045 0.3740820
-2.3835514 -1.9903730 0.3770112
-2.3800692 -2.0135616 0.3851956
-2.3827135 -2.2058771 0.4911766
-2.3743806 -2.1024631 0.4259529
-2.3767836 -2.0472669 0.3991969
-2.3822547 -2.2013160 0.4873385
-2.3793348 -2.1828428 0.4744931
-2.3752613 -2.1354792 0.4441551
-2.3787485 -2.1771976 0.4704484
-2.3761603 -2.0583350 0.4036584
-2.3876761 -2.2297906 0.5086275
-2.3757624 -2.0669128 0.4075706
-2.3816035 -2.1964063 0.4832173
-2.3804440 -2.1882528 0.4772899
-2.3797610 -2.0218432 0.3876973
-2.3769409 -2.0521541 0.4004582
-2.3851839 -2.2163813 0.4975766
-2.3789073 -2.1734934 0.4668316
-2.3782163 -2.1679160 0.4632789
-2.3772954 -2.1566490 0.4557782
-2.3768783 -2.1521306 0.4528905
-2.3763557 -2.1428063 0.4470180
-2.3753641 -2.1142617 0.4303856
-2.3790938 -2.0339157 0.3916971
-2.3780551 -2.1630711 0.4594455
-2.3833888 -2.2037715 0.4873314
-2.3844573 -2.2103276 0.4922064
-2.3888319 -2.2321776 0.5089627
-2.3761884 -2.0724272 0.4089842
-2.3805832 -2.1856495 0.4745010
-2.3756353 -2.1107051 0.4279927
-2.3801025 -2.1801459 0.4703344
-2.3758878 -2.0893033 0.4168605
-2.3773846 -2.0569869 0.4012657
-2.3764789 -2.1339145 0.4408278
-2.3862613 -2.2188583 0.4978559
-2.3828745 -2.1989622 0.4831180
-2.3759962 -2.1235492 0.4346752
-2.3784774 -2.0462328 0.3961553
-2.3896549 -1.9661451 0.3662689
-2.3761123 -2.0936641 0.4186266
-2.3876917 -2.2247672 0.5019909
-2.3759942 -2.1060476 0.4249197
-2.3768358 -2.1395642 0.4438849
-2.3761325 -2.1021864 0.4227642
-2.3802104 -2.1762451 0.4665452
-2.3857113 -2.2129443 0.4923555
-2.3776457 -2.1491985 0.4491220
-2.3817250 -2.1883651 0.4745854
-2.3797751 -2.1709880 0.4627100
-2.3768977 -2.1306393 0.4377134
-2.3914128 -1.9611454 0.3640860
-2.3862341 -1.9903808 0.3734754
-2.3786959 -2.0512519 0.3973118
-2.3826831 -2.1944357 0.4786361
-2.3775537 -2.0709854 0.4061631
-2.3793647 -2.1658977 0.4590820
-2.3874375 -2.2212248 0.4979156
-2.3807390 -2.0330490 0.3891263
-2.3815626 -2.1837438 0.4705360
-2.3887871 -2.2271198 0.5020930
-2.3779456 -2.1461448 0.4461953
-2.3791748 -2.1607220 0.4551835
-2.3842169 -2.2016176 0.4829295
-2.3880696 -1.9814520 0.3692405
-2.3860768 -1.9953702 0.3744329
-2.3854027 -1.9993490 0.3756898
-2.3774499 -2.0870132 0.4131122
-2.3854519 -2.2083356 0.4876620
-2.3771323 -2.1180222 0.4292450
-2.3868188 -2.2153209 0.4924498
-2.3828996 -2.1910259 0.4747190
-2.3791144 -2.1573928 0.4524743
-2.3813571 -2.1787920 0.4664414
-2.3884734 -2.2235390 0.4983392
-2.3780478 -2.0766910 0.4074113
-2.3790871 -2.1524848 0.4487363
-2.3805322 -2.1687192 0.4590745
-2.3777322 -2.1279060 0.4341667
-2.3784409 -2.1429645 0.4430208
-2.3902364 -2.2309797 0.5036855
-2.3783111 -2.1376386 0.4396909
-2.3775709 -2.1103546 0.4244041
-2.3812043 -2.1740891 0.4624573
-2.4006832 -1.9225465 0.3509123
-2.3935741 -1.9565190 0.3607178
-2.3897535 -1.9758102 0.3665417
-2.3877618 -1.9890609 0.3712623
-2.3832641 -2.0175992 0.3813919
-2.3830648 -2.0201994 0.3823943
-2.3823431 -2.0268199 0.3851493
-2.3780982 -2.1334827 0.4372950
-2.3845619 -2.1991448 0.4794431
-2.3779965 -2.1066348 0.4216967
-2.3895222 -2.2258961 0.4987478
-2.3830705 -2.1866297 0.4701349
-2.3824455 -2.1814003 0.4666269
-2.3857000 -2.2044371 0.4825923
-2.4017963 -1.9202159 0.3494029
-2.3852071 -2.0079851 0.3767540
-2.3805032 -2.0509219 0.3942310
-2.3782734 -2.0989254 0.4173685
-2.3782216 -2.1028769 0.4194600
-2.3782057 -2.1152118 0.4258169
-2.3806990 -2.1640341 0.4547577
-2.3869486 -2.2113397 0.4874396
-2.3841463 -2.1936466 0.4745534
-2.3817213 -2.0399333 0.3893649
-2.3795767 -2.1494862 0.4453877
-2.3887478 -2.2198188 0.4931325
-2.3817251 -2.1714001 0.4588384
-2.3792393 -2.1365654 0.4370805
-2.3807060 -2.0558673 0.3954511
-2.3791884 -2.0866823 0.4099791
-2.3788560 -2.0953547 0.4145561
-2.3921887 -2.2353600 0.5047703
-2.3857143 -2.2016309 0.4794070
-2.3794445 -2.0757636 0.4047189
-2.3808271 -2.1607904 0.4516164
-2.3791099 -2.0915889 0.4123815
-2.3826779 -2.1769795 0.4620478
-2.3869212 -2.2076876 0.4834379
-2.3908285 -2.2285331 0.4988590
-2.3790169 -2.1219134 0.4279708
-2.3806384 -2.1554789 0.4478419
-2.3793290 -2.1313310 0.4332783
-2.3800487 -2.1463558 0.4421635
-2.3790891 -2.1177710 0.4255734
-2.3837454 -2.1840985 0.4663810
-2.3843999 -2.1893992 0.4698319
-2.3791814 -2.1139180 0.4233563
-2.4034280 -1.9188994 0.3472851
-2.3993096 -1.9382105 0.3528604
-2.3979606 -1.9448758 0.3547932
-2.3921583 -1.9735035 0.3632446
-2.3886050 -1.9960560 0.3712474
-2.3818997 -2.1667550 0.4544814
-2.3801012 -2.1413027 0.4386038
-2.3854378 -2.1962651 0.4743936
-2.3899077 -2.2221990 0.4932042
-2.3931735 -1.9698107 0.3618959
-2.3889438 -2.2158688 0.4880880
-2.3831940 -2.0389273 0.3867780
-2.3797568 -2.1103576 0.4205688
-2.3919711 -2.2308344 0.4990053
-2.3811702 -2.1527489 0.4446470
-2.3842535 -2.0321445 0.3837371
-2.3804202 -2.0814936 0.4054595
-2.3880635 -2.2101594 0.4834202
-2.3831939 -2.1743301 0.4583940
-2.3839313 -2.1795641 0.4619013
-2.3855442 -2.1920649 0.4699560
-2.3828867 -2.1694063 0.4546227
-2.3807263 -2.1397789 0.4363584
-2.3910928 -2.2246940 0.4934592
-2.4010285 -1.9368955 0.3508125
-2.3901709 -1.9947335 0.3690633
-2.3865432 -2.0159633 0.3760743
-2.3857371 -2.0232801 0.3792593
-2.3855285 -2.0258802 0.3802540
-2.3851842 -2.0291878 0.3816430
-2.3818352 -2.0628425 0.3956797
-2.3815691 -2.0673968 0.3976689
-2.3806017 -2.0994897 0.4135499
-2.3804125 -2.1029430 0.4155623
-2.3804543 -2.1073965 0.4177107
-2.3806193 -2.0906781 0.4092093
-2.3867409 -2.1989172 0.4742046
-2.3852423 -2.1870075 0.4659522
-2.3827033 -2.1642613 0.4507030
-2.3923095 -1.9817584 0.3642402
-2.3901752 -2.2183673 0.4880473
-2.3806067 -2.1261289 0.4275326
-2.3816331 -2.1496809 0.4413531
-2.3849032 -2.1820769 0.4621665
-2.3814874 -2.0801587 0.4030720
-2.3817759 -2.1448036 0.4376521
-2.3808881 -2.1215288 0.4244137
-2.3962821 -1.9631965 0.3577086
-2.3957668 -1.9658596 0.3585009
-2.3892552 -2.0037068 0.3712126
-2.3809167 -2.1176370 0.4222552
-2.3896547 -2.2138149 0.4839117
-2.3937820 -2.2349610 0.5000649
-2.3825990 -2.1557750 0.4441058
-2.3867474 -2.1946540 0.4698154
-2.3847179 -2.1772615 0.4579426
-2.3922667 -2.2270851 0.4935217
-2.3840628 -2.1719148 0.4541832
-2.3912641 -2.2208421 0.4883270
-2.3879718 -2.2016423 0.4742752
-2.3977102 -1.9586663 0.3556599
-2.3879242 -2.0145977 0.3738197
-2.4044070 -1.9268906 0.3463228
-2.3937882 -1.9801502 0.3622021
-2.3844228 -2.0463768 0.3866190
-2.3817330 -2.0898527 0.4068428
-2.3859662 -2.1844893 0.4621806
-2.3867748 -2.1906456 0.4661229
-2.3908871 -2.2170133 0.4848220
-2.3825444 -2.1434725 0.4352495
-2.3821899 -2.0945591 0.4083756
-2.3878948 -2.1973381 0.4699260
-2.3844025 -2.1680902 0.4503284
-2.3934333 -2.2294204 0.4936360
-2.3930419 -1.9884727 0.3643388
-2.3870053 -2.0295454 0.3790830
-2.3822077 -2.0986566 0.4103395
-2.3821060 -2.1026199 0.4124034
-2.3820129 -2.1065824 0.4144722
-2.4064928 -1.9212849 0.3438907
-2.3832238 -2.1530080 0.4405532
-2.3821556 -2.1295517 0.4266379
-2.3852457 -2.1746994 0.4542163
-2.3861285 -2.1807514 0.4582398
-2.3924203 -2.2232528 0.4883943
-2.3832776 -2.1488352 0.4374161
-2.3836662 -2.0671169 0.3940867
-2.3839987 -2.1595396 0.4441214
-2.3903065 -2.2108902 0.4789323
-2.3956708 -1.9758356 0.3593368
-2.3871705 -2.1877544 0.4626869
-2.3825034 -2.1258971 0.4238591
-2.4061222 -1.9255780 0.3442589
-2.4020544 -1.9448861 0.3498761
-2.4014042 -1.9482407 0.3507228
-2.4006247 -1.9515547 0.3517437
-2.3920063 -1.9994006 0.3671222
-2.3896331 -2.0127008 0.3715680
-2.3870474 -2.0345204 0.3801972
-2.3856632 -2.0451024 0.3842072
-2.3829086 -2.1356589 0.4293387
-2.3944505 -2.2317098 0.4940809
-2.3836771 -2.0723593 0.3961075
-2.3922498 -2.2196717 0.4846330
-2.3881658 -2.1934811 0.4657557
-2.3935377 -2.2256895 0.4887054
-2.3891374 -2.1999774 0.4697420
-2.3969037 -1.9738553 0.3576621
-2.3946366 -1.9877787 0.3623201
-2.3835329 -2.0850234 0.4016063
-2.3831871 -2.1098103 0.4141586
-2.3831576 -2.1137539 0.4162636
-2.3831492 -2.1228712 0.4210297
-2.3859055 -2.1713792 0.4499174
-2.3834452 -2.0936508 0.4056296
-2.3873570 -2.1833985 0.4580462
-2.3866103 -2.1774642 0.4539213
-2.3916766 -2.2136715 0.4789380
-2.3834202 -2.1189411 0.4184986
-2.3884526 -2.1906422 0.4626138
-2.3837063 -2.1328887 0.4258255
-2.3838049 -2.0982112 0.4072768
-2.4037009 -1.9435729 0.3477680
-2.3836475 -2.1062760 0.4112786
-2.3847172 -2.1519488 0.4367810
-2.3854896 -2.1626001 0.4435540
-2.3893788 -2.1963090 0.4657384
-2.3845459 -2.1482058 0.4344434
-2.3842734 -2.1424092 0.4311029
-2.3842938 -2.1387814 0.4287008
-2.3964033 -2.2360372 0.4949201
-2.3947482 -2.2281327 0.4887177
-2.3840573 -2.1026515 0.4089670
-2.3883216 -2.1858278 0.4583889
-2.3904055 -2.2025726 0.4695894
-2.3937487 -2.2223128 0.4841631
-2.3841053 -2.1294032 0.4228987
-2.3865153 -2.1685859 0.4464015
-2.3905318 -2.0202738 0.3717554
-2.3990531 -1.9698711 0.3547490
-2.3985924 -1.9725287 0.3555874
-2.3950901 -1.9931114 0.3625705
-2.3869604 -2.0513577 0.3840333
-2.3856098 -2.0665518 0.3906804
-2.3845972 -2.0908027 0.4023197
-2.3842162 -2.1177351 0.4164157
-2.3915200 -2.2079551 0.4729668
-2.3877975 -2.1807008 0.4544432
-2.3996462 -1.9673750 0.3538256
-2.3963525 -1.9859912 0.3599081
-2.3854506 -2.0719939 0.3930375
-2.3858756 -2.1597423 0.4404560
-2.3959322 -2.2311912 0.4897256
-2.3931165 -2.2164031 0.4786808
-2.4005370 -1.9647230 0.3525173
-2.3847425 -2.1263846 0.4200543
-2.3892918 -2.1883332 0.4586715
-2.3875990 -2.1746284 0.4491926
-2.3867531 -2.1655988 0.4434084
-2.3899671 -2.1936574 0.4620937
-2.4094103 -1.9242251 0.3409358
-2.4013761 -1.9615623 0.3513567
-2.3876896 -2.0491273 0.3823165
-2.3905822 -2.1989421 0.4655577
-2.3858369 -2.0768463 0.3944191
-2.3851738 -2.1360443 0.4251721
-2.3950909 -2.2250142 0.4842038
-2.3917629 -2.2059158 0.4700464
-2.3850947 -2.1226235 0.4173812
-2.4089838 -1.9281673 0.3412784
-2.3983103 -2.2403067 0.4958529
-2.3890884 -2.1835842 0.4543732
-2.3857362 -2.1422252 0.4281794
-2.3942068 -2.2188752 0.4789412
-2.3987049 -1.9791875 0.3561505
-2.3861504 -2.0815935 0.3958769
-2.3859666 -2.0855749 0.3978786
-2.3852460 -2.1204815 0.4160229
-2.3859299 -2.1458635 0.4301955
-2.3928360 -2.2106371 0.4727502
-2.3877978 -2.1714324 0.4460159
-2.3862678 -2.1516815 0.4335247
-2.3970361 -2.2334831 0.4898807
-2.3872466 -2.1627113 0.4399628
-2.3856146 -2.1071608 0.4082403
-2.3857258 -2.1328277 0.4220192
-2.3923091 -2.0190572 0.3689106
-2.3904296 -2.1908728 0.4585818
-2.3917604 -2.2015185 0.4654323
-2.4042499 -1.9542292 0.3476583
-2.3863764 -2.0904626 0.3992218
-2.3871637 -2.1578171 0.4362127
-2.3938984 -2.2143340 0.4744922
-2.3962973 -2.2274229 0.4842473
-2.3863477 -2.1391273 0.4249496
-2.3881154 -2.1685577 0.4429226
-2.3930655 -2.2086877 0.4700720
-2.3861715 -2.1296489 0.4192818
-2.3953894 -2.2212835 0.4789817
-2.3915296 -2.1967286 0.4615333
-2.3886914 -2.0554897 0.3824965
-2.3864519 -2.0952714 0.4011950
-2.3875276 -2.0715846 0.3895769
-2.3904015 -2.1862388 0.4541908
-2.3875729 -2.0760110 0.3912120
-2.3892563 -2.1746458 0.4456755
-2.3871198 -2.1453151 0.4275549
-2.3929111 -2.2041449 0.4655933
-2.3990142 -2.2378015 0.4907562
-2.3903348 -2.1831627 0.4512481
-2.3877744 -2.1548690 0.4328302
-2.3867546 -2.1261833 0.4163511
-2.3974967 -2.2297720 0.4843458
-2.3885877 -2.1656564 0.4394867
-2.3871944 -2.1362654 0.4215377
-2.3984369 -1.9921495 0.3577943
-2.3868846 -2.1182016 0.4117708
-2.3903762 -2.1804586 0.4486644
-2.3877392 -2.1510066 0.4302205
-2.3868965 -2.1241146 0.4149515
-2.3964309 -2.2235825 0.4791533
-2.3879037 -2.0816599 0.3930473
-2.3913867 -2.1887196 0.4544855
-2.3927917 -2.1996304 0.4614381
-2.3894468 -2.1714638 0.4424860
-2.3945947 -2.2115837 0.4696632
[truncated: 7,821,318 more chars]
