# Supplementary material for: Fast Cylindrical Fitting Method Using Point Cloud’s Normals Estimation
Source: Hindawi journal article supplement (doi:10.1155/2018/8904653), 2018-12-12
Supplement: f1 [file 8904653.f1.zip › Point data/Point cloud1.txt]

0.00000000 0.00000000 0.00000000
0.00000000 0.00000000 0.00000000
-9.02200031 -4.44199991 0.06600000
-9.01799965 -4.44300032 0.06900000
-9.01564312 -4.44025278 0.06580780
-9.01247406 -4.43823862 0.06416080
-9.01000023 -4.43599987 0.06200000
-9.00500011 -4.43699980 0.06500000
-8.91300011 -4.39099979 0.04000000
-8.91018200 -4.38956547 0.03882150
-8.90900040 -4.38600016 0.03400000
-8.90299988 -4.38600016 0.03600000
-8.83800030 -4.35099983 0.01200000
-8.83549404 -4.35049248 0.01208610
-8.83197594 -4.34792423 0.01020590
-8.83019352 -4.34945345 0.01233460
-8.82917595 -4.34608698 0.00900020
-8.82406998 -4.34389400 0.00743950
-8.82186794 -4.34693527 0.01099980
-8.82000065 -4.34200048 0.00600000
-8.81326103 -4.34047127 0.00572550
-8.81322193 -4.34210920 0.00800020
-8.81099033 -4.33951569 0.00504420
-8.81086826 -4.33793497 0.00300000
-8.80717468 -4.33884859 0.00514430
-8.80440140 -4.33819771 0.00500020
-8.80231190 -4.33315325 0.00000000
-8.80223179 -4.33662558 0.00364030
-8.80200005 -4.38199997 0.06500000
-8.80084610 -4.33473492 0.00181890
-8.79800034 -4.38299990 0.06800000
-8.79648781 -4.33098936 -0.00146590
-8.79586697 -4.33393431 0.00200000
-8.79449558 -4.37975454 0.06467480
-8.79387760 -4.33131027 -0.00042130
-8.79367161 -4.32933044 -0.00300020
-8.79199982 -4.37699986 0.06100000
-8.78946495 -4.32895374 -0.00236850
-8.78808308 -4.37720633 0.06332970
-8.78724194 -4.32962704 -0.00099990
-8.78573322 -4.32486773 -0.00599980
-8.78135872 -4.32444811 -0.00555790
-8.78022003 -4.32264233 -0.00788310
-8.77835655 -4.32517529 -0.00400020
-8.77764225 -4.32082415 -0.00999960
-8.77206039 -4.31919050 -0.01002930
-8.76926994 -4.32113314 -0.00700020
-8.76926804 -4.31713247 -0.01300040
-8.76740837 -4.31746435 -0.01092280
-8.76685143 -4.31889868 -0.00867730
-8.76442719 -4.31754541 -0.00938760
-8.76335335 -4.31531525 -0.01314320
-8.76108932 -4.31304407 -0.01600020
-8.76095295 -4.31597710 -0.00999990
-8.76019001 -4.31452036 -0.01287550
-8.75817108 -4.31310892 -0.01436130
-8.75291061 -4.30895615 -0.01899980
-8.75231266 -4.31215382 -0.01300050
-8.75153732 -4.30971098 -0.01692100
-8.74988937 -4.31043482 -0.01477130
-8.74791813 -4.30649614 -0.02076750
-8.74511337 -4.30748081 -0.01751260
-8.74496841 -4.30603361 -0.02002620
-8.74043751 -4.30615950 -0.01739930
-8.73779488 -4.30390692 -0.02008350
-8.73626900 -4.30113220 -0.02500080
-8.73416519 -4.30181503 -0.02239180
-8.73205090 -4.30070353 -0.02351240
-8.72910881 -4.29842758 -0.02605280
-8.72808933 -4.29704475 -0.02800030
-8.72762394 -4.29937506 -0.02355410
-8.72031593 -4.29499578 -0.02756680
-8.72008991 -4.29304457 -0.03100030
-8.71909046 -4.29604435 -0.02500030
-8.71757221 -4.29372406 -0.02841290
-8.71418285 -4.29094315 -0.03169160
-8.71217918 -4.28908825 -0.03400070
-8.71109009 -4.29204369 -0.02800030
-8.70965767 -4.28981352 -0.03134700
-8.70599747 -4.28805208 -0.03253060
-8.70455360 -4.28478003 -0.03699810
-8.70331287 -4.28815413 -0.03100110
-8.70077991 -4.28456306 -0.03546930
-8.69819546 -4.28375244 -0.03592780
-8.69658089 -4.28128624 -0.04000270
-8.69595337 -4.28397703 -0.03399980
-8.69333267 -4.28202581 -0.03739830
-8.69236755 -4.27916479 -0.04137790
-8.68988991 -4.27993393 -0.03932590
-8.68944550 -4.27721882 -0.04300220
-8.68818092 -4.28108931 -0.03700080
-8.68293667 -4.27590609 -0.04290020
-8.68231201 -4.27415419 -0.04600170
-8.68117809 -4.27708721 -0.04000080
-8.67708874 -4.27519274 -0.04193720
-8.67559814 -4.27080250 -0.04899770
-8.67399979 -4.31799984 0.02700000
-8.67391205 -4.27395725 -0.04299960
-8.67354393 -4.27128744 -0.04697250
-8.67201519 -4.26940680 -0.05015040
-8.66837692 -4.26769352 -0.05199630
-8.66802406 -4.31698418 0.02816160
-8.66773510 -4.26919603 -0.04822820
-8.66770267 -4.31522608 0.02587640
-8.66568279 -4.26813698 -0.04945540
-8.66513348 -4.31306601 0.02400040
-8.66302776 -4.26668882 -0.05092990
-8.66282558 -4.31379366 0.02599170
-8.66086674 -4.26393414 -0.05499920
-8.66018391 -4.26529789 -0.05174470
-8.65968895 -4.26684713 -0.04899820
-8.65818501 -4.26383162 -0.05344810
-8.65813351 -4.31306601 0.02700040
-8.65787029 -4.31096840 0.02357410
-8.65586758 -4.30893373 0.02099970
-8.65543652 -4.26152802 -0.05657050
-8.65322304 -4.26011038 -0.05800150
-8.65275192 -4.31054115 0.02504680
-8.65246391 -4.26273632 -0.05199680
-8.65225410 -4.30917501 0.02295570
-8.65200043 -4.25599957 -0.58200002
-8.65122032 -4.30647707 0.01960530
-8.65095425 -4.26146412 -0.05414570
-8.64980507 -4.30803490 0.02235950
-8.64700031 -4.30399990 0.01800000
-8.64678192 -4.25439596 -0.58128262
-8.64606571 -4.30540895 0.02034280
-8.64589310 -4.25643873 -0.06100630
-8.64553738 -4.25771141 -0.05880100
-8.64515114 -4.25899792 -0.05604610
-8.64500046 -4.25299978 -0.57900000
-8.64424133 -4.25420237 -0.58234161
-8.64299965 -4.25500011 -0.58499998
-8.64236355 -4.25704670 -0.05860290
-8.64187908 -4.25287056 -0.58077878
-8.64066029 -4.25425100 -0.06240630
-8.64000034 -4.30399990 0.02100000
-8.63909721 -4.25593376 -0.05900300
-8.63620090 -4.25306988 -0.06206620
-8.63500023 -4.25099993 -0.58099991
-8.63298416 -4.25195169 -0.06258700
-8.63291168 -4.24995661 -0.06699930
-8.63095284 -4.25197744 -0.06099970
-8.62908936 -4.24822664 -0.06847640
-8.62699986 -4.29500008 0.01200000
-8.62673187 -4.24686861 -0.06999780
-8.62628174 -4.24864674 -0.06605010
-8.62446690 -4.24721050 -0.06800140
-8.62422276 -4.24910975 -0.06400170
-8.62233353 -4.24602509 -0.06941910
-8.62113380 -4.29196119 0.01037360
-8.62026882 -4.24413252 -0.07300230
-8.61950588 -4.29395056 0.01462320
-8.61917591 -4.24566889 -0.06838980
-8.61822224 -4.29011106 0.00900020
-8.61803341 -4.29250097 0.01307190
-8.61774540 -4.24415255 -0.07133700
-8.61395645 -4.24097919 -0.07599960
-8.61262608 -4.24189520 -0.07249710
-8.61104679 -4.24302340 -0.07000040
-8.61055851 -4.24033642 -0.07453890
-8.61035824 -4.28827715 0.01003140
-8.60926914 -4.28613281 0.00600020
-8.60773277 -4.23786879 -0.07899760
-8.60638142 -4.28598547 0.00753110
-8.60618496 -4.28453684 0.00525250
-8.60562325 -4.23904514 -0.07353940
-8.60416603 -4.23761034 -0.07688070
-8.60400009 -4.28999996 0.01500000
-8.60350990 -4.28551960 0.00834990
-8.60305214 -4.28360987 0.00532580
-8.60269070 -4.23561954 -0.08028100
-8.60113239 -4.28106689 0.00300000
-8.60104084 -4.23607779 -0.07831220
-8.60004616 -4.28323889 0.00603040
-8.59901810 -4.28794384 0.01370490
-8.59899998 -4.29099989 0.01800000
-8.59831238 -4.23615408 -0.07600280
-8.59699917 -4.28890562 0.01626740
-8.59600163 -4.23200083 -0.08500000
-8.59586143 -4.27995777 0.00335840
-8.59513378 -4.28606653 0.01200020
-8.59426212 -4.27796745 0.00104800
-8.59406471 -4.23302746 -0.08027280
-8.59338760 -4.28681087 0.01512170
-8.59300041 -4.28100014 0.00600000
-8.59132671 -4.23140669 -0.08230920
-8.59089375 -4.27771521 0.00193730
-8.59082222 -4.28591108 0.01499970
-8.59070301 -4.28490019 0.01225020
-8.59064007 -4.22882318 -0.08799630
-8.58915901 -4.28250027 0.00996390
-8.58900452 -4.23002338 -0.08446290
-8.58819389 -4.28418589 0.01223910
-8.58686543 -4.28093338 0.00899990
-8.58600044 -4.23000002 -0.08200000
-8.58513546 -4.22606659 -0.09000140
-8.58483887 -4.27564478 0.00095250
-8.58395672 -4.27297831 -0.00300000
-8.58360100 -4.22766590 -0.08595080
-8.58250141 -4.27386332 -0.00106760
-8.58195591 -4.28197813 0.01099990
-8.58025646 -4.22637129 -0.08679920
-8.57966232 -4.27961588 0.00871370
-8.57913780 -4.22406769 -0.09300150
-8.57800007 -4.27699947 0.00600000
-8.57738686 -4.27070332 -0.00411730
-8.57710457 -4.22430563 -0.08971800
-8.57622337 -4.27311087 0.00000000
-8.57513523 -4.26906776 -0.00600010
-8.57478046 -4.22342730 -0.09087840
-8.57453537 -4.22426367 -0.08800550
-8.57382202 -4.22091293 -0.09599800
-8.57284546 -4.22264051 -0.09233150
-8.57065868 -4.26716757 -0.00653200
-8.56999969 -4.27299976 0.00300000
-8.56914520 -4.21864891 -0.09842350
-8.56908989 -4.22204447 -0.09100100
-8.56800938 -4.26598406 -0.00692180
-8.56800079 -4.26900053 -0.00300000
-8.56708908 -4.26404381 -0.00900010
-8.56702423 -4.27197552 0.00249720
-8.56615734 -4.21854973 -0.09708080
-8.56382465 -4.26610899 -0.00497460
-8.56364536 -4.21982574 -0.09399610
-8.56286812 -4.21593571 -0.10199840
-8.56261635 -4.21828651 -0.09604750
-8.56200027 -4.26900005 0.00000000
-8.56132412 -4.27101564 0.00312070
-8.56035614 -4.26417685 -0.00600020
-8.56011391 -4.21587515 -0.10029440
-8.55930805 -4.26926041 0.00111360
-8.55908966 -4.21425629 -0.10313250
-8.55880070 -4.26039934 -0.01200110
-8.55842018 -4.21671438 -0.09699340
-8.55817413 -4.26186323 -0.00960130
-8.55759907 -4.21280241 -0.10499510
-8.55615616 -4.21478176 -0.10079970
-8.55500031 -4.26900005 0.00200000
-8.55397606 -4.26149511 -0.00885280
-8.55300045 -4.26499939 -0.00300000
-8.55244637 -4.21422052 -0.10000520
-8.55213356 -4.21006536 -0.10800170
-8.55192375 -4.25885057 -0.01171050
-8.55099106 -4.21155024 -0.10395750
-8.55095577 -4.25697851 -0.01499990
-8.54973316 -4.26370573 -0.00358370
-8.54795837 -4.21147203 -0.10262210
-8.54787159 -4.21004248 -0.10501920
-8.54758358 -4.25799990 -0.01136770
-8.54753494 -4.20820665 -0.10971560
-8.54753304 -4.25537109 -0.01592720
-8.54702568 -4.26481438 -0.00038390
-8.54680061 -4.26309299 -0.00357470
-8.54557228 -4.20863819 -0.10751780
-8.54428864 -4.25664568 -0.01199900
-8.54399967 -4.26000023 -0.00600000
-8.54351044 -4.25275612 -0.01799900
-8.54276180 -4.20797491 -0.10754710
-8.54246902 -4.20575809 -0.11203690
-8.54235935 -4.25523806 -0.01381910
-8.54149532 -4.20824480 -0.10500610
-8.54100037 -4.20200014 -0.12000000
-8.53967762 -4.20640659 -0.10979530
-8.53847027 -4.20444918 -0.11237920
-8.53784370 -4.20366573 -0.11495430
-8.53710175 -4.25027847 -0.01918670
-8.53626442 -4.20613050 -0.10900340
-8.53600025 -4.25599957 -0.00900000
-8.53577900 -4.25288916 -0.01499960
-8.53573322 -4.24886751 -0.02099930
-8.53494072 -4.20310879 -0.11396430
-8.53488064 -4.20222759 -0.11749860
-8.53356647 -4.24928331 -0.01918700
-8.53341675 -4.20069695 -0.12001990
-8.53251553 -4.19776201 -0.12499290
-8.53186703 -4.20293427 -0.11099830
-8.53153419 -4.25000858 -0.01718770
-8.53144646 -4.25425243 -0.00982260
-8.53091049 -4.20101976 -0.11783660
-8.53032494 -4.24660301 -0.02271160
-8.52999973 -4.25599957 -0.00600000
-8.52939129 -4.19768953 -0.12450770
-8.52888489 -4.25456285 -0.00797540
-8.52831173 -4.25215530 -0.01200040
-8.52826881 -4.19513226 -0.12800400
-8.52815247 -4.20104647 -0.11524370
-8.52806664 -4.19934225 -0.12027650
-8.52753544 -4.24526596 -0.02400150
-8.52749062 -4.24824381 -0.01800100
-8.52574539 -4.19772196 -0.12418460
-8.52540112 -4.24651003 -0.01994690
-8.52462482 -4.25191927 -0.01058790
-8.52451515 -4.19623756 -0.12603720
-8.52400970 -4.19876432 -0.11894240
-8.52386570 -4.19293404 -0.13099790
-8.52274704 -4.19796610 -0.12101560
-8.52213478 -4.19906664 -0.11700190
-8.52213383 -4.25206661 -0.00900010
-8.52199554 -4.24416924 -0.02269410
-8.52095509 -4.24797821 -0.01499990
-8.52037334 -4.24239111 -0.02500470
-8.51979160 -4.19437456 -0.12904230
-8.51926899 -4.19113207 -0.13400421
-8.51926804 -4.24413347 -0.02100070
-8.51846886 -4.25018072 -0.01100590
-8.51750565 -4.24005604 -0.02750320
-8.51745033 -4.19485474 -0.12495700
-8.51733112 -4.19667101 -0.11999060
-8.51616573 -4.19542646 -0.12285450
-8.51533222 -4.19214821 -0.13103589
-8.51508999 -4.18904400 -0.13700140
-8.51486969 -4.19390249 -0.12623081
-8.51460075 -4.24568272 -0.01726290
-8.51439953 -4.24819946 -0.01300060
-8.51387024 -4.23853731 -0.02848360
-8.51383972 -4.24080944 -0.02429990
-8.51235676 -4.19417572 -0.12300520
-8.51215172 -4.23938322 -0.02632660
-8.51149750 -4.19183111 -0.12886490
-8.51108932 -4.18704462 -0.14000151
-8.51104259 -4.19000578 -0.13403220
-8.51025867 -4.24568939 -0.01492670
-8.50948715 -4.23930597 -0.02506800
-8.50890541 -4.19029284 -0.13082170
-8.50747299 -4.18932915 -0.13269810
-8.50735950 -4.19217682 -0.12600531
-8.50726986 -4.18513203 -0.14300451
-8.50706959 -4.23649693 -0.02914310
-8.50704670 -4.24285841 -0.01869820
-8.50669003 -4.24484491 -0.01499950
-8.50661755 -4.18828869 -0.13704219
-8.50586700 -4.24093437 -0.02099970
-8.50568581 -4.18969774 -0.12952510
-8.50500107 -4.23400068 -0.03300000
-8.50498581 -4.18804836 -0.13494880
-8.50435638 -4.23717785 -0.02700110
-8.50399971 -4.18400002 -0.50000000
-8.50373268 -4.18286800 -0.14599539
-8.50322151 -4.18910933 -0.12900341
-8.50300598 -4.18677139 -0.13835390
-8.50211239 -4.24004602 -0.02075440
-8.50208664 -4.18705797 -0.13581820
-8.50081730 -4.18373919 -0.14428410
-8.50055790 -4.23343039 -0.03190050
-8.50049210 -4.18271923 -0.49992990
-8.50047207 -4.23837423 -0.02246150
-8.50015450 -4.23497343 -0.02903620
-8.50000095 -4.18100023 -0.14900000
-8.49971581 -4.18572903 -0.13800550
-8.49926662 -4.24113369 -0.01800060
-8.49904346 -4.18702126 -0.13200070
-8.49899960 -4.18100023 -0.49700001
-8.49837685 -4.23668957 -0.02399820
-8.49834442 -4.18415451 -0.14303949
-8.49800014 -4.23000002 -0.03600000
-8.49760056 -4.23380089 -0.02999860
-8.49755573 -4.18607664 -0.13383269
-8.49673271 -4.23801613 -0.02148640
-8.49666595 -4.18144178 -0.14751071
-8.49663353 -4.18198013 -0.50150859
-8.49661064 -4.23152924 -0.03309460
-8.49558640 -4.18359566 -0.14128600
-8.49499607 -4.18499804 -0.13500001
-8.49449444 -4.18282461 -0.14348890
-8.49439716 -4.18065023 -0.49990240
-8.49423409 -4.18210077 -0.14603840
-8.49225998 -4.18288088 -0.13937961
-8.49213314 -4.23706722 -0.02100030
-8.49189281 -4.22911644 -0.03505940
-8.49171829 -4.23561621 -0.02340640
-8.49155235 -4.18199873 -0.14307640
-8.49149704 -4.18079138 -0.14781590
-8.49091530 -4.18295813 -0.13699859
-8.49083519 -4.22787762 -0.03701530
-8.49031162 -4.23315525 -0.02700100
-8.48900032 -4.17899990 -0.50000000
-8.48878193 -4.18134975 -0.14125121
-8.48817730 -4.22601938 -0.03928080
-8.48790646 -4.23328447 -0.02593730
-8.48766804 -4.18035936 -0.14488620
-8.48664474 -4.18082523 -0.13999410
-8.48600578 -4.17749453 -0.15201800
-8.48499966 -4.23124075 -0.02796820
-8.48477554 -4.17941046 -0.14549451
-8.48451138 -4.23375654 -0.02399860
-8.48399734 -4.22548199 -0.03835360
-8.48351097 -4.22675657 -0.03599790
-8.48349857 -4.17759657 -0.15010589
-8.48344517 -4.22322178 -0.04200220
-8.48266792 -4.22933292 -0.03000240
-8.48200035 -4.17899990 -0.14300001
-8.48200035 -4.17199993 -0.16300000
-8.48123264 -4.17511511 -0.15500429
-8.48115826 -4.22400141 -0.03962220
-8.48052883 -4.17579126 -0.15227839
-8.48038101 -4.22991610 -0.02829600
-8.47839355 -4.22843981 -0.02978960
-8.47804451 -4.17002249 -0.16600090
-8.47722530 -4.17711067 -0.14600390
-8.47710514 -4.17536640 -0.15086401
-8.47699833 -4.17299891 -0.15800001
-8.47686768 -4.22993326 -0.02699960
-8.47647667 -4.17394352 -0.15483209
-8.47637653 -4.22110510 -0.04266320
-8.47626781 -4.22013330 -0.04500140
-8.47626591 -4.17608356 -0.14850020
-8.47608948 -4.22304487 -0.03900040
-8.47526741 -4.22613382 -0.03300100
-8.47499943 -4.17029095 -0.16466300
-8.47422218 -4.16810942 -0.16900440
-8.47372150 -4.22786427 -0.02895710
-8.47363949 -4.17165422 -0.15945230
-8.47353649 -4.17273664 -0.15626490
-8.47350788 -4.22019339 -0.04306200
-8.47282314 -4.17491341 -0.14899690
-8.47165108 -4.22414207 -0.03420110
-8.47097111 -4.16886187 -0.16670230
-8.47022629 -4.16711092 -0.17200460
-8.46995449 -4.21597672 -0.04799970
-8.46965122 -4.21894932 -0.04343090
-8.46908951 -4.22604513 -0.03000030
-8.46899986 -4.16900015 -0.16300000
-8.46889019 -4.17243862 -0.15201600
-8.46873283 -4.22186708 -0.03599890
-8.46871471 -4.17116785 -0.15710400
-8.46844101 -4.22379017 -0.03350680
-8.46719074 -4.16858625 -0.16602340
-8.46700001 -4.16499996 -0.17500000
-8.46587563 -4.16607332 -0.17155901
-8.46518040 -4.17037153 -0.15675990
-8.46422005 -4.16915798 -0.16069371
-8.46406555 -4.21444750 -0.04794670
-8.46373081 -4.16685200 -0.16903460
-8.46330833 -4.22016811 -0.03673860
-8.46322441 -4.21311140 -0.05000130
-8.46232891 -4.22121954 -0.03465110
-8.46213245 -4.16906548 -0.15800250
-8.46173477 -4.21586752 -0.04499860
-8.46155548 -4.21877861 -0.03899800
-8.46045685 -4.16471672 -0.17202960
-8.46012497 -4.21993542 -0.03562520
-8.45987320 -4.16577625 -0.16841771
-8.45971775 -4.16391897 -0.17551591
-8.45939064 -4.21193123 -0.05049270
-8.45914936 -4.21418667 -0.04643440
-8.45899963 -4.16800022 -0.16100000
-8.45688438 -4.16496897 -0.16756169
-8.45679092 -4.21684647 -0.04023340
-8.45672417 -4.16441727 -0.17003450
-8.45668888 -4.20984602 -0.05299810
-8.45599937 -4.21146345 -0.04976490
-8.45444489 -4.21522188 -0.04200220
-8.45435619 -4.21817780 -0.03600150
-8.45388126 -4.20899868 -0.05316230
-8.45359898 -4.16178703 -0.17803369
-8.45239544 -4.16255569 -0.17412470
-8.45183563 -4.21640158 -0.03875100
-8.45130157 -4.21420097 -0.04255790
-8.45040131 -4.16319752 -0.16600791
-8.45037937 -4.16040277 -0.17910750
-8.45011806 -4.20860720 -0.05232050
-8.44999981 -4.26599979 0.03900000
-8.44986725 -4.20693350 -0.05599910
-8.44900036 -4.15600014 -0.19200000
-8.44885445 -4.16204166 -0.17031661
-8.44791126 -4.20895624 -0.05099950
-8.44726753 -4.21513367 -0.03900120
-8.44726753 -4.21213341 -0.04500140
-8.44724464 -4.26484013 0.03820850
-8.44723892 -4.15936279 -0.17950080
-8.44602013 -4.26658678 0.04025570
-8.44591141 -4.15795565 -0.18399809
-8.44429016 -4.15504456 -0.19265860
-8.44422150 -4.16010952 -0.17200451
-8.44417572 -4.15945435 -0.17703059
-8.44400024 -4.20699978 -0.59600002
-8.44399738 -4.21058655 -0.04571940
-8.44349003 -4.20324373 -0.05900340
-8.44328117 -4.15613842 -0.18700621
-8.44299984 -4.15299988 -0.19800000
-8.44265842 -4.21250534 -0.04165000
-8.44254208 -4.15755033 -0.18200640
-8.44203949 -4.20482922 -0.05557530
-8.44117928 -4.15908813 -0.17500371
-8.44087315 -4.15774727 -0.17963390
-8.44086647 -4.20793390 -0.04799920
-8.44079590 -4.15539265 -0.18901791
-8.44015217 -4.21096897 -0.04318910
-8.43999958 -4.26100016 0.03500000
-8.43999958 -4.15199995 -0.20100001
-8.43966579 -4.20543480 -0.59596622
-8.43828773 -4.15764952 -0.17798500
-8.43821526 -4.20150805 -0.05954910
-8.43811512 -4.15404081 -0.19204810
-8.43759155 -4.26176119 0.03684520
-8.43700027 -4.19999981 -0.06200000
-8.43700027 -4.20599985 -0.59899998
-8.43700027 -4.20300007 -0.59299999
-8.43695927 -4.15412045 -0.18967880
-8.43628597 -4.15110588 -0.20171151
-8.43601990 -4.20667744 -0.04844250
-8.43572521 -4.20467663 -0.59667122
-8.43552399 -4.15554857 -0.18266509
-8.43500042 -4.26200008 0.03800000
-8.43500042 -4.14900017 -0.44000000
-8.43480492 -4.15288925 -0.19504170
-8.43426609 -4.20213270 -0.05700180
-8.43400002 -4.20800066 -0.04500000
-8.43400002 -4.14499998 -0.44000000
-8.43395615 -4.20497799 -0.05099970
-8.43359566 -4.20657635 -0.04760800
-8.43315887 -4.20393705 -0.59583461
-8.43311691 -4.15399551 -0.18610130
-8.43274307 -4.15166855 -0.19621439
-8.43196964 -4.15290403 -0.18871111
-8.43137169 -4.15192080 -0.19304851
-8.43101120 -4.19870520 -0.06101680
-8.43099976 -4.25699997 0.03300000
-8.43051147 -4.19675684 -0.06499620
-8.43022537 -4.14411116 -0.43701169
-8.42950726 -4.14710283 -0.43907669
-8.42934322 -4.14966106 -0.20103200
-8.42899990 -4.20300007 -0.59500003
-8.42879009 -4.15143013 -0.19080140
-8.42877293 -4.15288782 -0.18699500
-8.42800045 -4.14599991 -0.21500000
-8.42793274 -4.25609064 0.03267610
-8.42781353 -4.14594030 -0.43678299
-8.42760181 -4.19880152 -0.05899720
-8.42731094 -4.14215326 -0.43401599
-8.42707729 -4.19642496 -0.06321650
-8.42700005 -4.20200014 -0.05400000
-8.42686749 -4.20493412 -0.04799920
-8.42635822 -4.14866829 -0.20403290
-8.42633915 -4.15034866 -0.19363260
-8.42621326 -4.15067911 -0.19059780
-8.42573166 -4.14486885 -0.21799310
-8.42569065 -4.14585876 -0.43840539
-8.42561913 -4.20235872 -0.05173200
-8.42500019 -4.25699997 0.03500000
-8.42477417 -4.14901924 -0.19771920
-8.42471504 -4.25405645 0.03092360
-8.42441559 -4.14374447 -0.43376389
-8.42426777 -4.14113140 -0.43101379
-8.42422295 -4.19311094 -0.06800180
-8.42360210 -4.20294809 -0.04960160
-8.42322540 -4.14411020 -0.22100590
-8.42292881 -4.14729595 -0.20467541
-8.42290974 -4.25564671 0.03366770
-8.42263317 -4.14631176 -0.20701560
-8.42244720 -4.14921999 -0.19201019
-8.42214489 -4.14781189 -0.20229030
-8.42199993 -4.25199986 0.02900000
-8.42199993 -4.14599991 -0.44299999
-8.42196751 -4.19448185 -0.06469730
-8.42172432 -4.14835358 -0.19776380
-8.42160034 -4.13980341 -0.42797971
-8.42134380 -4.14270973 -0.43076181
-8.42126656 -4.14319897 -0.43379840
-8.42122269 -4.19511127 -0.06200160
-8.42105484 -4.14519453 -0.43914390
-8.42099953 -4.19899988 -0.05600000
-8.42086792 -4.14293528 -0.22399651
-8.42076588 -4.14373684 -0.21860389
-8.42015934 -4.14772129 -0.19971859
-8.42000008 -4.20100021 -0.05100000
-8.41963196 -4.14399529 -0.43741360
-8.41959381 -4.14691162 -0.20299660
-8.41926670 -4.14513159 -0.21000659
-8.41922283 -4.14811039 -0.19500519
-8.41899490 -4.13799763 -0.42499980
-8.41889477 -4.19126797 -0.06927120
-8.41888428 -4.14097548 -0.42779079
-8.41886330 -4.14093304 -0.22699641
-8.41782951 -4.14270163 -0.43407121
-8.41711807 -4.14405870 -0.21300299
-8.41694355 -4.14237499 -0.22135690
-8.41693974 -4.14297056 -0.43699691
-8.41674519 -4.14195395 -0.22413740
-8.41631413 -4.14715385 -0.19800740
-8.41631317 -4.14015293 -0.23000850
-8.41615868 -4.14011097 -0.42480621
-8.41602898 -4.14299965 -0.21505190
-8.41600037 -4.25299978 0.03200000
-8.41600037 -4.13999987 -0.41900000
-8.41592503 -4.14464664 -0.20712720
-8.41589928 -4.13695049 -0.42199489
-8.41585064 -4.19076061 -0.06835620
-8.41520309 -4.14403915 -0.20952380
-8.41480160 -4.19239950 -0.06500620
-8.41453266 -4.19526625 -0.05900370
-8.41423702 -4.14211702 -0.43301219
-8.41422749 -4.13935995 -0.41720760
-8.41408157 -4.13907194 -0.42080399
-8.41399956 -4.13899994 -0.23300000
-8.41396904 -4.14247704 -0.21802510
-8.41386795 -4.14593506 -0.20099691
-8.41384506 -4.14120865 -0.22449119
-8.41361141 -4.14419270 -0.20572449
-8.41354370 -4.19722271 -0.05558640
-8.41323471 -4.13511610 -0.41801170
-8.41320324 -4.19089937 -0.06679220
-8.41262054 -4.13917637 -0.23001580
-8.41259098 -4.13975239 -0.42430070
-8.41233158 -4.18852711 -0.07177040
-8.41222286 -4.18711090 -0.07400200
-8.41199970 -4.19799995 -0.05300000
-8.41199970 -4.13800001 -0.41200000
-8.41182613 -4.14091444 -0.42999119
-8.41180897 -4.14139795 -0.22102129
-8.41173077 -4.14386702 -0.20399350
-8.41126442 -4.19478416 -0.05847090
-8.41113853 -4.18930054 -0.06900000
-8.41062927 -4.13430834 -0.41503099
-8.41038322 -4.13802624 -0.23375610
-8.40999985 -4.13700008 -0.40900001
-8.40979767 -4.13815308 -0.41668430
-8.40961552 -4.14128542 -0.21586050
-8.40960217 -4.14029598 -0.22401600
-8.40926838 -4.14013147 -0.42701361
-8.40921116 -4.13930798 -0.22764149
-8.40895748 -4.18756628 -0.07192960
-8.40882301 -4.14291239 -0.20699570
-8.40875816 -4.13337278 -0.41203710
-8.40823936 -4.13808966 -0.23059700
-8.40818310 -4.14070749 -0.21906839
-8.40813351 -4.19206619 -0.06200100
-8.40799999 -4.13600016 -0.40599999
-8.40750980 -4.13724375 -0.41559231
-8.40719986 -4.13260651 -0.40896109
-8.40709686 -4.19308090 -0.05958910
-8.40695572 -4.13897848 -0.42399779
-8.40668583 -4.14116430 -0.21170510
-8.40663242 -4.18564510 -0.07464480
-8.40652370 -4.13656616 -0.41196159
-8.40617847 -4.19508886 -0.05600120
-8.40551186 -4.13175964 -0.40597641
-8.40537357 -4.13569260 -0.40848970
-8.40535069 -4.13766479 -0.23003700
-8.40526867 -4.14009953 -0.21682520
-8.40521336 -4.13899374 -0.22457910
-8.40499973 -4.13500023 -0.24699999
-8.40499973 -4.13500023 -0.40300000
-8.40451241 -4.13775969 -0.42097560
-8.40409851 -4.18489170 -0.07518370
-8.40393925 -4.18360567 -0.07814740
-8.40393734 -4.13046074 -0.40304491
-8.40374279 -4.19171667 -0.06062800
-8.40373611 -4.13993216 -0.21418120
-8.40351200 -4.18675661 -0.07099590
-8.40343761 -4.13582563 -0.41239700
-8.40339184 -4.13896799 -0.22161441
-8.40315342 -4.13656807 -0.23303200
-8.40302372 -4.13350391 -0.25003049
-8.40299988 -4.24200010 0.02400000
-8.40279293 -4.13602543 -0.41523319
-8.40232086 -4.13015747 -0.40001529
-8.40227795 -4.18544102 -0.07298630
-8.40213203 -4.13606548 -0.41800660
-8.40206623 -4.13455486 -0.40635619
-8.40200043 -4.18900013 -0.06500000
-8.40200043 -4.13299990 -0.39700001
-8.40200043 -4.14900017 -0.47799999
-8.40189362 -4.13790798 -0.22560631
-8.40142250 -4.19075203 -0.06168980
-8.40113163 -4.18206596 -0.08000120
-8.40109158 -4.13304472 -0.25300270
-8.40100002 -4.13199997 -0.39399999
-8.40092850 -4.13521051 -0.41274989
-8.40082836 -4.13891602 -0.21499559
-8.40078926 -4.13538837 -0.23602220
-8.40073776 -4.13617849 -0.23204461
-8.40042210 -4.19171190 -0.05899590
-8.40016174 -4.12858725 -0.39396071
-8.40013599 -4.13438559 -0.40901691
-8.39999962 -4.13199997 -0.25600001
-8.39940166 -4.13519764 -0.41501981
-8.39937401 -4.13264465 -0.40129939
-8.39866161 -4.18062019 -0.08088440
-8.39844322 -4.18236923 -0.07770560
-8.39831257 -4.13213205 -0.25270811
-8.39827156 -4.13813353 -0.21800700
-8.39820766 -4.13603497 -0.22958431
-8.39815712 -4.12758541 -0.39096069
-8.39799976 -4.24400043 0.02600000
-8.39799976 -4.13100004 -0.38800001
-8.39796734 -4.13398457 -0.23799910
-8.39792252 -4.13508558 -0.23417839
-8.39786816 -4.18393421 -0.07399880
-8.39752197 -4.14856243 -0.47914490
-8.39748096 -4.13732576 -0.22165591
-8.39708996 -4.13404417 -0.41200441
-8.39707565 -4.13330650 -0.40684170
-8.39675617 -4.13126278 -0.39574960
-8.39637089 -4.18690395 -0.06614790
-8.39615917 -4.13644648 -0.22493340
-8.39599991 -4.13000011 -0.38499999
-8.39570618 -4.13235617 -0.24993640
-8.39567280 -4.24191523 0.02461660
-8.39564705 -4.17882442 -0.08199660
-8.39557171 -4.18863726 -0.06307960
-8.39554405 -4.13137484 -0.39843550
-8.39546680 -4.23959637 0.02218250
-8.39536095 -4.13317728 -0.24101029
-8.39513683 -4.12706709 -0.38800630
-8.39509010 -4.13304424 -0.40900439
-8.39503479 -4.13004923 -0.39081541
-8.39500046 -4.13000011 -0.38200000
-8.39465046 -4.13380241 -0.23641001
-8.39436436 -4.13054943 -0.39412659
-8.39416218 -4.13515520 -0.22908039
-8.39415264 -4.18180990 -0.07646860
-8.39400005 -4.23799992 0.02000000
-8.39400005 -4.12900019 -0.27000001
-8.39366436 -4.13232660 -0.24401930
-8.39326763 -4.13213205 -0.40601301
-8.39323425 -4.13274336 -0.23887961
-8.39316845 -4.13066339 -0.25653040
-8.39299965 -4.12900019 -0.37900001
-8.39285851 -4.13142204 -0.24702530
-8.39274216 -4.14748907 -0.47885230
-8.39257908 -4.12528467 -0.38502651
-8.39236450 -4.12938976 -0.38807389
-8.39230919 -4.13420534 -0.23185070
-8.39213371 -4.12806559 -0.27300429
-8.39200020 -4.13500023 -0.22700000
-8.39200020 -4.12799978 -0.37599999
-8.39186573 -4.13093376 -0.40299350
-8.39136982 -4.18409491 -0.06928450
-8.39099979 -4.12799978 -0.37300000
-8.39099979 -4.14799976 -0.48100001
-8.39090633 -4.18512630 -0.06667510
-8.39068508 -4.17983532 -0.07875540
-8.39053345 -4.12726259 -0.27601761
-8.39031029 -4.13015366 -0.40001479
-8.39000130 -4.13400030 -0.23000000
-8.39000034 -4.12699986 -0.37000000
-8.39000034 -4.12400007 -0.38200000
-8.38984966 -4.13173342 -0.24173249
-8.38973331 -4.18286657 -0.07099770
-8.38973331 -4.17586803 -0.08499730
-8.38939953 -4.13019705 -0.25301209
-8.38925266 -4.12735367 -0.37682521
-8.38907242 -4.12841749 -0.38297591
-8.38905525 -4.13117123 -0.24410540
-8.38899994 -4.23899984 0.02300000
-8.38899994 -4.12699986 -0.27900001
-8.38899994 -4.12699986 -0.36700001
-8.38891220 -4.12935543 -0.39291301
-8.38881779 -4.12562847 -0.37351969
-8.38876820 -4.17759800 -0.08167420
-8.38876247 -4.12843609 -0.38853660
-8.38868999 -4.12984800 -0.39698541
-8.38836861 -4.13194370 -0.23720740
-8.38822269 -4.18511057 -0.06500170
-8.38799953 -4.12599993 -0.36399999
-8.38792324 -4.12896252 -0.25599769
-8.38786507 -4.13293362 -0.23299620
-8.38759995 -4.12280369 -0.37898201
-8.38739872 -4.13035440 -0.24817450
-8.38700008 -4.12599993 -0.36100000
-8.38644409 -4.12521839 -0.35801899
-8.38640881 -4.12419987 -0.36961809
-8.38640499 -4.12676287 -0.37379140
-8.38600063 -4.17800045 -0.08000000
-8.38599968 -4.12900019 -0.25799999
-8.38593197 -4.12624264 -0.27584821
-8.38586617 -4.12493372 -0.35499430
-8.38586617 -4.12793350 -0.39099380
-8.38586235 -4.17564917 -0.08400330
-8.38576603 -4.12758636 -0.38577649
-8.38572598 -4.13186502 -0.23599230
-8.38557148 -4.12735319 -0.38244641
-8.38526821 -4.12513208 -0.35201129
-8.38502502 -4.12230301 -0.37155771
-8.38500023 -4.23299980 0.01800000
-8.38500023 -4.12500000 -0.34900001
-8.38466072 -4.12573290 -0.36729479
-8.38436127 -4.12833309 -0.25484321
-8.38431072 -4.12715340 -0.38801441
-8.38402557 -4.12453938 -0.35734940
-8.38399982 -4.12400007 -0.30199999
-8.38380909 -4.13039875 -0.23802300
-8.38366795 -4.17333221 -0.08800700
-8.38354874 -4.12883902 -0.25158319
-8.38344002 -4.12944078 -0.24588791
-8.38338470 -4.17462826 -0.08491870
-8.38326740 -4.18013287 -0.07400240
-8.38300037 -4.12400007 -0.33800000
-8.38286781 -4.12393570 -0.30499521
-8.38276100 -4.18153048 -0.06956430
-8.38275051 -4.12574911 -0.27337810
-8.38269043 -4.12684727 -0.38498569
-8.38240719 -4.12432671 -0.35511720
-8.38222218 -4.12310886 -0.30800810
-8.38200378 -4.12894392 -0.24894020
-8.38199997 -4.12300014 -0.32900000
-8.38199997 -4.12400007 -0.33500001
-8.38191032 -4.12295628 -0.32599649
-8.38188362 -4.12515163 -0.27606949
-8.38173676 -4.12987041 -0.24099240
-8.38173199 -4.12286806 -0.32298970
-8.38144779 -4.12080193 -0.36668059
-8.38143444 -4.23329306 0.01891050
-8.38140202 -4.12319803 -0.31101489
-8.38126755 -4.12313223 -0.32001019
-8.38126755 -4.12613201 -0.38201231
-8.38112164 -4.12486839 -0.36480319
-8.38108921 -4.12304401 -0.31400341
-8.38108921 -4.12304401 -0.31700340
-8.38099957 -4.17500019 -0.56599998
-8.38093281 -4.12480927 -0.27988869
-8.38037682 -4.12315130 -0.30463541
-8.38030529 -4.12230206 -0.33607161
-8.38029861 -4.12526608 -0.37639850
-8.38026333 -4.12399006 -0.35255221
-8.38022137 -4.12510872 -0.37900999
-8.38008881 -4.17504454 -0.08300090
-8.37986755 -4.12893438 -0.24399610
-8.37946415 -4.12522888 -0.27301511
-8.37899971 -4.23400021 0.02000000
-8.37879181 -4.12260628 -0.30749941
-8.37857628 -4.12746334 -0.25180119
-8.37839413 -4.12216091 -0.32863671
-8.37835598 -4.17017698 -0.09100390
-8.37820053 -4.12357044 -0.35523859
-8.37818527 -4.17169094 -0.08807880
-8.37815571 -4.12222052 -0.31053090
-8.37813187 -4.12406492 -0.37300590
-8.37800121 -4.12800026 -0.24699999
-8.37798786 -4.12399387 -0.27599961
-8.37744236 -4.12212944 -0.31396791
-8.37709045 -4.17704439 -0.07700080
-8.37705708 -4.23029089 0.01599300
-8.37700081 -4.12400055 -0.37000000
-8.37687778 -4.12278080 -0.36047360
-8.37669086 -4.17329121 -0.56404191
-8.37609291 -4.12355375 -0.27896979
-8.37607956 -4.12703848 -0.25000241
-8.37593555 -4.12155533 -0.32550541
-8.37591171 -4.17895555 -0.07099930
-8.37582397 -4.12391424 -0.36699229
-8.37545872 -4.17748499 -0.07448970
-8.37523174 -4.17437696 -0.56705159
-8.37491035 -4.12295628 -0.36399621
-8.37489796 -4.17028570 -0.08890920
-8.37475014 -4.12245512 -0.35169610
-8.37460136 -4.11694670 -0.33837479
-8.37454128 -4.12156773 -0.31808779
-8.37439823 -4.17219830 -0.08600410
-8.37433338 -4.12616348 -0.25301009
-8.37413311 -4.12231445 -0.35944200
-8.37399960 -4.12300014 -0.28200001
-8.37371826 -4.22934961 0.01564230
-8.37346935 -4.17173576 -0.56196427
-8.37310219 -4.12117290 -0.30876109
-8.37300110 -4.16800070 -0.09400000
-8.37287998 -4.12339211 -0.27366391
-8.37287045 -4.16886091 -0.09124550
-8.37259293 -4.17606115 -0.07605110
-8.37253571 -4.12226486 -0.35502279
-8.37232971 -4.17249537 -0.56419128
-8.37223339 -4.12092876 -0.30591619
-8.37191868 -4.12066031 -0.32890680
-8.37138653 -4.17070723 -0.56089360
-8.37108898 -4.17404413 -0.08000080
-8.37100029 -4.17399979 -0.56800002
-8.37075520 -4.12053061 -0.31754220
-8.37059498 -4.12044668 -0.32353780
-8.37057304 -4.12036133 -0.31205460
-8.37008095 -4.12024260 -0.31489801
-8.36999989 -4.22900009 0.01700000
-8.36999989 -4.11999989 -0.29899999
-8.36996078 -4.12047243 -0.30203459
-8.36973381 -4.17586756 -0.07399760
-8.36966610 -4.12032747 -0.30502430
-8.36922646 -4.16911221 -0.08800240
-8.36918449 -4.12009001 -0.30800670
-8.36900043 -4.11999989 -0.33100000
-8.36891079 -4.11995602 -0.32799649
-8.36858463 -4.12262058 -0.27212861
-8.36839962 -4.16710043 -0.09316190
-8.36836815 -4.12018108 -0.32201421
-8.36831951 -4.17016792 -0.56189138
-8.36773491 -4.16586781 -0.09699690
-8.36699963 -4.22399998 0.01200000
-8.36647511 -4.17248821 -0.08063990
-8.36625099 -4.11953068 -0.30286819
-8.36601448 -4.11947870 -0.30612451
-8.36600018 -4.16800022 -0.55800003
-8.36539745 -4.17119837 -0.08300390
-8.36522388 -4.16652203 -0.09250140
-8.36522007 -4.16521025 -0.09645820
-8.36499977 -4.12200022 -0.27000001
-8.36498165 -4.11898518 -0.30011940
-8.36484623 -4.16992378 -0.56398970
-8.36382389 -4.16402292 -0.09823500
-8.36351204 -4.16864061 -0.56149119
-8.36345387 -4.17257309 -0.07846630
-8.36343861 -4.12121630 -0.27301431
-8.36249542 -4.11857939 -0.30167720
-8.36206722 -4.16956854 -0.08370350
-8.36164761 -4.16423512 -0.09582570
-8.36111355 -4.11832952 -0.30388221
-8.36100006 -4.22499990 0.01400000
-8.36070633 -4.11781740 -0.29808030
-8.36056614 -4.22145700 0.01047790
-8.36017036 -4.17031431 -0.08142390
-8.36013508 -4.16806793 -0.08500140
-8.35900021 -4.21999979 0.00900000
-8.35864449 -4.16382313 -0.09399600
-8.35799980 -4.16699982 -0.56099999
-8.35748768 -4.17024279 -0.08000470
-8.35739994 -4.16019869 -0.10300490
-8.35722828 -4.16177940 -0.09859690
-8.35700035 -4.11700010 -0.29600000
-8.35664368 -4.11682367 -0.29898721
-8.35601902 -4.11700869 -0.30200070
-8.35541916 -4.16726208 -0.08392910
-8.35541534 -4.11720514 -0.30501521
-8.35534763 -4.16083860 -0.10052350
-8.35451221 -4.16575718 -0.08799490
-8.35313320 -4.16106653 -0.09700160
-8.35255718 -4.15989923 -0.10110070
-8.35213661 -4.16706800 -0.08200130
-8.35200024 -4.21999979 0.01100000
-8.35199833 -4.15799856 -0.10600000
-8.35099983 -4.21600008 0.00600000
-8.35031700 -4.15806532 -0.10386780
-8.34967041 -4.16522837 -0.08598160
-8.34895611 -4.16297817 -0.09099950
-8.34799957 -4.15899992 -0.54900002
-8.34788036 -4.15819979 -0.10195600
-8.34752941 -4.21456814 0.00463780
-8.34749699 -4.15632343 -0.10627770
-8.34723949 -4.16424799 -0.08678940
-8.34513950 -4.15766335 -0.54734790
-8.34512711 -4.15603065 -0.10530340
-8.34430027 -4.16101837 -0.09248080
-8.34399986 -4.21600008 0.00900000
-8.34399986 -4.21299982 0.00300000
-8.34285450 -4.21414518 0.00604600
-8.34208775 -4.15604401 -0.10300110
-8.34201717 -4.15600872 -0.54500121
-8.34177971 -4.15288973 -0.11099710
-8.34168911 -4.15392160 -0.10707520
-8.34152794 -4.15675116 -0.54740661
-8.34118271 -4.16059351 -0.09098500
-8.34117794 -4.16208935 -0.08800190
-8.34068775 -4.15930414 -0.09441310
-8.33964539 -4.15291214 -0.10856560
-8.33822346 -4.15711117 -0.09700260
-8.33717442 -4.15308666 -0.10600220
-8.33695889 -4.15542364 -0.54731631
-8.33682251 -4.14991188 -0.11399760
-8.33642578 -4.15394545 -0.54410797
-8.33600044 -4.21199989 0.00500000
-8.33600044 -4.20900011 0.00000000
-8.33595657 -4.15897751 -0.09099950
-8.33549786 -4.15097046 -0.11146870
-8.33500004 -4.15600014 -0.55000001
-8.33419991 -4.15715885 -0.09539770
-8.33291054 -4.15495586 -0.09999890
-8.33200359 -4.15100193 -0.10800000
-8.33188248 -4.15274572 -0.54456139
-8.33180046 -4.14739847 -0.11701120
-8.33147717 -4.14953613 -0.11214010
-8.33058262 -4.15664959 -0.09484590
-8.33054924 -4.15027380 -0.53803551
-8.33031082 -4.15315485 -0.54702038
-8.33017063 -4.15155792 -0.54248208
-8.32863617 -4.15372515 -0.09982210
-8.32816887 -4.15174341 -0.54471081
-8.32808590 -4.15204287 -0.10300110
-8.32806873 -4.20427561 -0.00267860
-8.32800007 -4.20800018 0.00300000
-8.32758331 -4.14993143 -0.53970683
-8.32713413 -4.14506674 -0.12000190
-8.32695675 -4.14897919 -0.11099940
-8.32538033 -4.15069103 -0.54395950
-8.32518864 -4.20453596 -0.00130370
-8.32499981 -4.15399981 -0.09700000
-8.32499981 -4.14799976 -0.53500003
-8.32356358 -4.15039015 -0.10438160
-8.32341194 -4.14473438 -0.11853290
-8.32273197 -4.14286709 -0.12299600
-8.32248974 -4.14624405 -0.11400670
-8.32155323 -4.14731789 -0.53606439
-8.32115459 -4.15104198 -0.10072060
-8.32068920 -4.20289516 -0.00194460
-8.32031059 -4.14815474 -0.54102021
-8.31951523 -4.14328003 -0.11989510
-8.31941986 -4.20130253 -0.00403780
-8.31862354 -4.14731121 -0.10800810
-8.31826305 -4.14113092 -0.12600400
-8.31804562 -4.14402199 -0.11700060
-8.31635094 -4.14763308 -0.10606280
-8.31599998 -4.14300013 -0.52899998
-8.31565094 -4.13995552 -0.12683760
-8.31545639 -4.14156628 -0.12225600
-8.31499958 -4.14599991 -0.53799999
-8.31439972 -4.14519930 -0.11100530
-8.31427097 -4.14913511 -0.10200330
-8.31398296 -4.19793272 -0.00722550
-8.31368828 -4.14184475 -0.11999550
-8.31226635 -4.20013428 -0.00300010
-8.31197071 -4.14152098 -0.52760577
-8.31187344 -4.11252165 -0.22984309
-8.31139946 -4.19620180 -0.00900040
-8.31133461 -4.19803762 -0.00567640
-8.31020260 -4.14560890 -0.10705970
-8.30997849 -4.14349031 -0.11398600
-8.30964661 -4.13682365 -0.13099439
-8.30904198 -4.14002085 -0.12300060
-8.30759525 -4.19486284 -0.00932770
-8.30748558 -4.13874388 -0.52196771
-8.30706882 -4.13717794 -0.12712391
-8.30686760 -4.14381170 -0.10999480
-8.30629349 -4.14148998 -0.11587350
-8.30570221 -4.13918400 -0.52620977
-8.30562210 -4.13430977 -0.13401011
-8.30561924 -4.14021826 -0.52888668
-8.30482292 -4.14391136 -0.10799770
-8.30473423 -4.19586611 -0.00599980
-8.30391312 -4.19195652 -0.01199990
-8.30326271 -4.13744211 -0.52229577
-8.30317688 -4.19417906 -0.00828130
-8.30300045 -4.13600016 -0.51899999
-8.30246067 -4.13436985 -0.13225570
-8.30201817 -4.14225769 -0.11169070
-8.30126762 -4.13313389 -0.13700441
-8.30061626 -4.13972616 -0.11593080
-8.30052948 -4.13826370 -0.12000770
-8.30045319 -4.19171572 -0.01090530
-8.30041885 -4.13691235 -0.52355582
-8.30004597 -4.13502312 -0.12800071
-8.29962826 -4.13781500 -0.52797639
-8.29849815 -4.19021749 -0.01305750
-8.29841423 -4.13265467 -0.13454470
-8.29777908 -4.19222116 -0.00897680
-8.29768753 -4.13084459 -0.13999470
-8.29715347 -4.13512516 -0.52165151
-8.29673386 -4.13733339 -0.12016100
-8.29604912 -4.13871431 -0.11516020
-8.29597473 -4.13193083 -0.13584889
-8.29535675 -4.13317728 -0.13100560
-8.29490280 -4.12968779 -0.14141850
-8.29413319 -4.13399029 -0.52115399
-8.29399967 -4.15799999 -0.06800000
-8.29392815 -4.13496447 -0.52399552
-8.29345894 -4.13037682 -0.13818350
-8.29199982 -4.15999985 -0.06300000
-8.29115009 -4.13643551 -0.11896490
-8.29109001 -4.13104486 -0.13400140
-8.29100037 -4.13100004 -0.51200002
-8.29097080 -4.13468981 -0.12276980
-8.29009438 -4.12704706 -0.14500161
-8.28999996 -4.23500013 0.05300000
-8.28975010 -4.12911844 -0.13888291
-8.28899956 -4.18800020 -0.01200000
-8.28899956 -4.18499994 -0.01700000
-8.28892517 -4.13500929 -0.12109750
-8.28800011 -4.15500021 -0.07100000
-8.28800011 -4.13199997 -0.52100003
-8.28775024 -4.12604046 -0.14607190
-8.28732681 -4.15914631 -0.06311220
-8.28700066 -4.12900066 -0.13699999
-8.28660011 -4.13180065 -0.12799381
-8.28653240 -4.12826490 -0.50903273
-8.28626919 -4.12513399 -0.14800480
-8.28600025 -4.15700006 -0.06600000
-8.28599167 -4.12707186 -0.14227280
-8.28586292 -4.13493156 -0.11999800
-8.28542423 -4.13229275 -0.12566780
-8.28520393 -4.12953997 -0.51342303
-8.28470325 -4.12840176 -0.51099050
-8.28368664 -4.23192215 0.05131230
-8.28340054 -4.12459373 -0.14610040
-8.28309822 -4.15741110 -0.06465850
-8.28295517 -4.12697697 -0.13999920
-8.28277779 -4.12288952 -0.15099600
-8.28271580 -4.18270922 -0.01818390
-8.28254700 -4.12604666 -0.14260919
-8.28253078 -4.15463591 -0.07017860
-8.28236198 -4.13201380 -0.12369950
-8.28231144 -4.12915564 -0.13100490
-8.28199959 -4.12599993 -0.50599998
-8.28189468 -4.13008261 -0.12841789
-8.28108883 -4.18104506 -0.02000020
-8.28100014 -4.23000002 0.05000000
-8.28100014 -4.18400002 -0.01500000
-8.28070259 -4.12361670 -0.14649320
-8.27999973 -4.15799999 -0.06300000
-8.27999973 -4.15500021 -0.06900000
-8.27985001 -4.12607765 -0.50880557
-8.27932453 -4.12711430 -0.51248169
-8.27900028 -4.12099981 -0.15400000
-8.27900028 -4.12799978 -0.51499999
-8.27890778 -4.12495375 -0.14299840
-8.27852631 -4.12765074 -0.13245890
-8.27799988 -4.10400009 -0.42899999
-8.27799988 -4.12400007 -0.50300002
-8.27776814 -4.12975073 -0.12651031
-8.27735615 -4.12585020 -0.51089031
-8.27619839 -4.17955446 -0.02017450
-8.27600002 -4.23099995 0.05200000
-8.27600002 -4.10300016 -0.42600000
-8.27582645 -4.12085104 -0.15208100
-8.27575970 -4.12701988 -0.13219410
-8.27451038 -4.12525463 -0.51203161
-8.27400017 -4.15500021 -0.06600000
-8.27400017 -4.15199995 -0.07200000
-8.27341175 -4.10257339 -0.42580900
-8.27337837 -4.18068600 -0.01799860
-8.27335453 -4.17717886 -0.02300100
-8.27326584 -4.12513256 -0.13700441
-8.27285767 -4.12192869 -0.49999139
-8.27242661 -4.12395668 -0.50908339
-8.27224541 -4.12266636 -0.50386262
-8.27218437 -4.12601662 -0.13237910
-8.27204418 -4.12702227 -0.12800071
-8.27157307 -4.11728525 -0.16001110
-8.27141476 -4.11897993 -0.15524770
-8.27131653 -4.12495995 -0.13465180
-8.27100182 -4.12100124 -0.14800011
-8.27035618 -4.11913204 -0.15293060
-8.27018261 -4.11821842 -0.15734960
-8.27000046 -4.12300014 -0.50800002
-8.26917362 -4.12308645 -0.14000291
-8.26870155 -4.12017584 -0.49867919
-8.26826191 -4.12118006 -0.50221318
-8.26817036 -4.11908484 -0.49601021
-8.26791668 -4.11595869 -0.16199841
-8.26786327 -4.17489719 -0.02426890
-8.26783848 -4.12504387 -0.13176620
-8.26722336 -4.11911106 -0.15100411
-8.26721001 -4.10176229 -0.42657611
-8.26718426 -4.11754274 -0.15638331
-8.26613235 -4.12278414 -0.13876630
-8.26599979 -4.17299986 -0.02600000
-8.26599979 -4.10200024 -0.42899999
-8.26577187 -4.11920452 -0.49851859
-8.26540565 -4.12120199 -0.14200699
-8.26524258 -4.12047005 -0.50292432
-8.26460266 -4.11380148 -0.16499200
-8.26431084 -4.11577654 -0.15880071
-8.26403332 -4.12293863 -0.13555710
-8.26399994 -4.10099983 -0.42500001
-8.26386547 -4.11693287 -0.15399750
-8.26299953 -4.11700010 -0.49399999
-8.26216602 -4.11307430 -0.16530100
-8.26213646 -4.11906767 -0.14500239
-8.26186752 -4.11726141 -0.49658850
-8.26167393 -4.11804104 -0.49912700
-8.26095581 -4.11197805 -0.16799910
-8.26051235 -4.11875677 -0.50197041
-8.26039696 -4.11519718 -0.15700760
-8.26016808 -4.12003183 -0.14022569
-8.25968456 -4.12184286 -0.13699479
-8.25902939 -4.11210012 -0.16583450
-8.25899982 -4.17000008 -0.02900000
-8.25899982 -4.11941433 -0.14257480
-8.25851250 -4.11775637 -0.14799130
-8.25769234 -4.11077499 -0.16916551
-8.25718880 -4.11615467 -0.49803481
-8.25687599 -4.11393785 -0.15899760
-8.25666428 -4.11542177 -0.49508649
-8.25647640 -4.11295795 -0.16176631
-8.25622654 -4.11911345 -0.13900380
-8.25608253 -4.16881466 -0.02973600
-8.25486565 -4.11593294 -0.15099750
-8.25399971 -4.11199999 -0.48699999
-8.25375271 -4.11726999 -0.14509229
-8.25364685 -4.11619997 -0.14868690
-8.25359154 -4.11179638 -0.16299190
-8.25309753 -4.10903168 -0.17099530
-8.25243187 -4.16804934 -0.02912800
-8.25237942 -4.16668653 -0.03199760
-8.25211143 -4.11003733 -0.16667800
-8.25200272 -4.11800098 -0.14200000
-8.25124645 -4.11602640 -0.14723089
-8.25100040 -4.16900015 -0.02600000
-8.25100040 -4.11399984 -0.49599999
-8.25099564 -4.11399746 -0.15399989
-8.25090885 -4.11499310 -0.15031120
-8.25049496 -4.10837030 -0.17255840
-8.25048828 -4.11024332 -0.48402861
-8.25008392 -4.10704184 -0.17700180
-8.24991512 -4.10995770 -0.16499829
-8.24968910 -4.10846329 -0.16986290
-8.24921608 -4.11074781 -0.48696250
-8.24899960 -4.18699980 0.00400000
-8.24822330 -4.11611128 -0.14500390
-8.24791718 -4.10692930 -0.17567541
-8.24756145 -4.10835361 -0.16830879
-8.24713898 -4.10506916 -0.17900300
-8.24700546 -4.11200285 -0.15600009
-8.24698925 -4.16423368 -0.03340800
-8.24686813 -4.10893440 -0.48099229
-8.24596024 -4.11313629 -0.15192930
-8.24583054 -4.16553926 -0.03043900
-8.24507236 -4.10926104 -0.48561811
-8.24473286 -4.11386681 -0.14799520
-8.24391460 -4.10395670 -0.18199810
-8.24372196 -4.10775423 -0.48027250
-8.24356556 -4.10504198 -0.17724420
-8.24300194 -4.11000109 -0.15899999
-8.24300003 -4.11000013 -0.49000001
-8.24248981 -4.10624361 -0.17101020
-8.24193001 -4.10794830 -0.48230249
-8.24152565 -4.10508585 -0.17569610
-8.24108982 -4.10204411 -0.18500200
-8.24100018 -4.18300009 0.00100000
-8.24098015 -4.10357523 -0.18004780
-8.24091053 -4.11195469 -0.15099829
-8.24061775 -4.10555696 -0.17286010
-8.24056435 -4.16240549 -0.03339720
-8.24021721 -4.10510826 -0.47501260
-8.24006557 -4.10803270 -0.48600391
-8.23967743 -4.18531132 0.00384820
-8.23908997 -4.10804415 -0.16200180
-8.23868942 -4.10565090 -0.47791001
-8.23853397 -4.15926886 -0.03800250
-8.23837852 -4.16268635 -0.03199760
-8.23791218 -4.10095644 -0.18799800
-8.23759842 -4.10640669 -0.48108771
-8.23751545 -4.18325567 0.00194070
-8.23746490 -4.16031742 -0.03532700
-8.23744106 -4.10802031 -0.16004190
-8.23711777 -4.10179615 -0.18261740
-8.23708534 -4.11004210 -0.15400159
-8.23700047 -4.18499994 0.00400000
-8.23608398 -4.10304165 -0.17700180
-8.23539829 -4.10619879 -0.16500799
-8.23508739 -4.09904289 -0.19100200
-8.23479843 -4.10019302 -0.18613850
-8.23463345 -4.15854216 -0.03723660
-8.23440266 -4.10696983 -0.16057540
-8.23400116 -4.10361433 -0.47533330
-8.23391628 -4.10756016 -0.15803429
-8.23348904 -4.10141611 -0.18086450
-8.23309326 -4.10224056 -0.47121370
-8.23307705 -4.10534954 -0.16569470
-8.23307323 -4.10626650 -0.16311610
-8.23288345 -4.10194159 -0.46799329
-8.23286724 -4.10493422 -0.47999230
-8.23233891 -4.18221617 0.00174180
-8.23221684 -4.10410833 -0.16800439
-8.23190594 -4.09795237 -0.19399780
-8.23164654 -4.15882111 -0.03499850
-8.23148727 -4.15624571 -0.04100240
-8.23128319 -4.10259771 -0.47442281
-8.23024559 -4.09887600 -0.18688840
-8.23006344 -4.09972143 -0.18281551
-8.22969723 -4.09770298 -0.19173780
-8.22968483 -4.15755033 -0.03640350
-8.22922897 -4.09611416 -0.19600540
-8.22922802 -4.10011339 -0.46501279
-8.22908974 -4.10304451 -0.47700509
-8.22900581 -4.10300303 -0.17000011
-8.22900009 -4.18100023 0.00100000
-8.22812653 -4.10042763 -0.46818900
-8.22726631 -4.09813309 -0.18500599
-8.22693157 -4.10071373 -0.47079921
-8.22640324 -4.09520054 -0.19900981
-8.22626877 -4.10113430 -0.17300570
-8.22609425 -4.09600067 -0.19441840
-8.22600079 -4.09708929 -0.19025689
-8.22594738 -4.09945869 -0.46641341
-8.22586727 -4.10493422 -0.16199739
-8.22586632 -4.09793377 -0.46199259
-8.22539997 -4.10119915 -0.47402301
-8.22504616 -4.15302277 -0.04300020
-8.22453403 -4.15526962 -0.03800250
-8.22439861 -4.09719896 -0.18800910
-8.22408962 -4.09404469 -0.20200220
-8.22337818 -4.09968996 -0.17598671
-8.22334385 -4.09876108 -0.46645859
-8.22239971 -4.09619904 -0.45902231
-8.22233105 -4.10219812 -0.16714090
-8.22212791 -4.09906387 -0.47100729
-8.22199440 -4.09599733 -0.19099990
-8.22197819 -4.15290308 -0.04190770
-8.22191238 -4.09295607 -0.20499779
-8.22167015 -4.09367609 -0.20066440
-8.22165489 -4.09766388 -0.46468350
-8.22146988 -4.10105753 -0.16969490
-8.22099972 -4.19899988 0.03200000
-8.22034550 -4.09441996 -0.19678730
-8.22026730 -4.09813309 -0.17900580
-8.21960640 -4.09480381 -0.19299079
-8.21959877 -4.09179974 -0.20798980
-8.21930122 -4.15123892 -0.04366500
-8.21913242 -4.10106564 -0.16800269
-8.21895695 -4.09497786 -0.45599759
-8.21877956 -4.14988804 -0.04599880
-8.21859169 -4.09779644 -0.46797669
-8.21814156 -4.09657288 -0.46342170
-8.21748734 -4.15224648 -0.04100240
-8.21714497 -4.09728193 -0.18004280
-8.21678066 -4.09389067 -0.19599479
-8.21626186 -4.09913015 -0.17100550
-8.21612549 -4.09194183 -0.20322120
-8.21591187 -4.09295607 -0.45299521
-8.21543026 -4.09448719 -0.45966661
-8.21517849 -4.09053230 -0.20888670
-8.21507549 -4.09603786 -0.46400419
-8.21500015 -4.19899988 0.03400000
-8.21473980 -4.09795952 -0.17490980
-8.21445084 -4.09328461 -0.45539871
-8.21439457 -4.09519625 -0.18500890
-8.21416950 -4.14797163 -0.04677270
-8.21409607 -4.08904791 -0.21300250
-8.21408939 -4.09204483 -0.19900221
-8.21392250 -4.09076357 -0.20472230
-8.21313381 -4.09711647 -0.17667620
-8.21312904 -4.09456539 -0.46244559
-8.21309566 -4.19618225 0.03055230
-8.21286869 -4.14593363 -0.04899920
-8.21205616 -4.09179354 -0.45276919
-8.21173954 -4.09387016 -0.18699411
-8.21153641 -4.08726597 -0.21601410
-8.21147728 -4.09299707 -0.45745721
-8.21135044 -4.14833593 -0.04510820
-8.21091080 -4.09095478 -0.20199780
-8.21080208 -4.08951950 -0.20652910
-8.21029186 -4.09664631 -0.17598480
-8.21025562 -4.09504080 -0.18169230
-8.20989609 -4.09573841 -0.17887710
-8.20953274 -4.09026575 -0.44702899
-8.20926762 -4.08613300 -0.21900710
-8.20923138 -4.09352589 -0.18644060
-8.20918560 -4.08868551 -0.20964730
-8.20884895 -4.19430447 0.02934380
-8.20878029 -4.09289074 -0.18999490
-8.20840645 -4.09165525 -0.45565149
-8.20785522 -4.09051561 -0.45249331
-8.20777988 -4.08889055 -0.20499450
-8.20754147 -4.09400988 -0.18223070
-8.20740032 -4.08519936 -0.22201081
-8.20724678 -4.09212351 -0.45901379
-8.20708942 -4.09504509 -0.17900200
-8.20693207 -4.08695030 -0.21264949
-8.20677948 -4.08888960 -0.44398800
-8.20644760 -4.14385176 -0.05007020
-8.20622063 -4.19511223 0.03100080
-8.20608997 -4.09104443 -0.19300210
-8.20585632 -4.14494848 -0.04769190
-8.20559788 -4.08479929 -0.22498900
-8.20431137 -4.08715439 -0.44101670
-8.20415783 -4.09193659 -0.18692440
-8.20408440 -4.19104338 0.02600030
-8.20408154 -4.08754206 -0.20697680
-8.20399284 -4.08630848 -0.21182670
-8.20395470 -4.09297657 -0.18199900
-8.20385933 -4.08393002 -0.22799610
-8.20359230 -4.09029531 -0.45503291
-8.20347786 -4.08524561 -0.21506231
-8.20328522 -4.08455944 -0.22026010
-8.20313835 -4.19289923 0.02912310
-8.20299435 -4.08776426 -0.44440341
-8.20298195 -4.08882523 -0.45135999
-8.20277596 -4.08988857 -0.19599470
-8.20224667 -4.09253645 -0.18470380
-8.20200729 -4.08300400 -0.23000020
-8.20177937 -4.08588982 -0.43798810
-8.20164871 -4.08813572 -0.44898021
-8.20149422 -4.08363533 -0.22543199
-8.20102406 -4.14115572 -0.05263890
-8.20088196 -4.08594084 -0.20999700
-8.20083046 -4.08420563 -0.21710511
-8.20072937 -4.09055853 -0.18905319
-8.20000267 -4.08200121 -0.23300010
-8.19995594 -4.13997793 -0.05499970
-8.19981670 -4.08790827 -0.19899550
-8.19979572 -4.08934784 -0.19319980
-8.19900036 -4.08500004 -0.43500000
-8.19866943 -4.08508253 -0.43767431
-8.19839859 -4.08419847 -0.21301030
-8.19833469 -4.08604002 -0.44261500
-8.19825172 -4.19006681 0.02685090
-8.19804478 -4.08702183 -0.44900250
-8.19791222 -4.08095598 -0.23599750
-8.19789791 -4.08323622 -0.22058199
-8.19782352 -4.14191151 -0.04899900
-8.19755936 -4.08215380 -0.22814660
-8.19726944 -4.08787203 -0.19743620
-8.19717979 -4.14048052 -0.05125860
-8.19709492 -4.09004784 -0.18700220
-8.19671822 -4.08635807 -0.20101760
-8.19637394 -4.08318710 -0.21600990
-8.19617176 -4.18629980 0.02326680
-8.19603157 -4.08821487 -0.19473310
-8.19599819 -4.08066750 -0.23417930
-8.19573116 -4.07986593 -0.23899209
-8.19560146 -4.08580112 -0.44597831
-8.19548416 -4.08478308 -0.44030049
-8.19548321 -4.08217239 -0.22426990
-8.19532681 -4.13773680 -0.05699110
-8.19505405 -4.18904066 0.02669330
-8.19499683 -4.08112240 -0.23025750
-8.19459248 -4.08279753 -0.21898910
-8.19418049 -4.08808947 -0.19000420
-8.19400024 -4.08199978 -0.42899999
-8.19395733 -4.08497906 -0.20399889
-8.19394016 -4.08212519 -0.22169229
-8.19358349 -4.08689404 -0.19746310
-8.19355297 -4.13866997 -0.05254830
-8.19334888 -4.07917356 -0.24201030
-8.19319344 -4.08759212 -0.19314870
-8.19277859 -4.08488989 -0.44298801
-8.19270229 -4.08120441 -0.22579810
-8.19178772 -4.08439302 -0.20701990
-8.19176769 -4.08338690 -0.21279040
-8.19175529 -4.08027220 -0.23025160
-8.19154453 -4.08318186 -0.43681431
-8.19136524 -4.07818079 -0.24401090
-8.19134426 -4.07902861 -0.23626570
-8.19116783 -4.08585501 -0.19818400
-8.19100285 -4.13800097 -0.05200000
-8.19099998 -4.08099937 -0.42600000
-8.19094467 -4.07849407 -0.24005510
-8.19090462 -4.08486843 -0.20139609
-8.19075871 -4.08387661 -0.21004510
-8.19017220 -4.08406734 -0.20505349
-8.19013309 -4.08306646 -0.44000721
-8.18986034 -4.13682222 -0.05562820
-8.18982506 -4.07691288 -0.24699470
-8.18941593 -4.13557720 -0.05803280
-8.18908978 -4.08004475 -0.22700250
-8.18900013 -4.18599987 0.02500000
-8.18862152 -4.08071947 -0.42938870
-8.18843842 -4.07906389 -0.23149230
-8.18826675 -4.07613373 -0.25000820
-8.18813229 -4.08606577 -0.19600320
-8.18713284 -4.13306665 -0.06100100
-8.18700027 -4.18200016 0.02100000
-8.18700027 -4.07499981 -0.25299999
-8.18700027 -4.08199978 -0.43700001
-8.18699074 -4.07736254 -0.24006660
-8.18594933 -4.08397484 -0.19899879
-8.18575382 -4.13475657 -0.05758650
-8.18573093 -4.07786608 -0.23299240
-8.18568325 -4.07573748 -0.24784590
-8.18544292 -4.08071899 -0.21603809
-8.18494034 -4.07971811 -0.42824730
-8.18477154 -4.07689810 -0.23743090
-8.18424797 -4.08282137 -0.20348360
-8.18400002 -4.07399988 -0.25900000
-8.18375301 -4.13538122 -0.05500510
-8.18362999 -4.08215332 -0.20902739
-8.18322849 -4.08311415 -0.20100559
-8.18278122 -4.07435179 -0.25075489
-8.18201160 -4.07300568 -0.26100039
-8.18174934 -4.07937384 -0.21802001
-8.18174171 -4.07587147 -0.23799250
-8.18156815 -4.08138227 -0.21041951
-8.18152809 -4.08056307 -0.21359280
-8.18135738 -4.07541084 -0.24321860
-8.18099976 -4.07900000 -0.43099999
-8.18082523 -4.08191252 -0.20399560
-8.18048954 -4.13024759 -0.06300380
-8.18000317 -4.07200193 -0.26400009
-8.18000031 -4.18200016 0.02300000
-8.17931557 -4.07854986 -0.21859540
-8.17928314 -4.13162279 -0.05983840
-8.17926979 -4.07513428 -0.24100800
-8.17902565 -4.07956791 -0.21393560
-8.17899990 -4.07499981 -0.40799999
-8.17878628 -4.17890978 0.02003010
-8.17860317 -4.08081102 -0.20895770
-8.17853355 -4.17727184 0.01800120
-8.17800045 -4.07100010 -0.26699999
-8.17800045 -4.07800007 -0.42800000
-8.17783928 -4.08009243 -0.21144751
-8.17776108 -4.07768250 -0.22095490
-8.17744350 -4.13222361 -0.05800310
-8.17717838 -4.07408857 -0.24400529
-8.17700005 -4.07399988 -0.40500000
-8.17678261 -4.13013792 -0.06120800
-8.17669010 -4.07684517 -0.22399150
-8.17629719 -4.07134438 -0.26198751
-8.17626667 -4.07846260 -0.21559080
-8.17592144 -4.07171154 -0.25722671
-8.17559814 -4.07979965 -0.20998970
-8.17535591 -4.07317686 -0.24701069
-8.17500019 -4.07299995 -0.40200001
-8.17426682 -4.12713480 -0.06600220
-8.17413139 -4.07606649 -0.22700369
-8.17399979 -4.07200003 -0.25000000
-8.17390919 -4.07343245 -0.40688470
-8.17373180 -4.17503023 0.01651360
-8.17300129 -4.07200050 -0.39899999
-8.17299366 -4.07799625 -0.21299981
-8.17221546 -4.07410669 -0.23000599
-8.17202950 -4.07068586 -0.25772059
-8.17178345 -4.17688894 0.01999950
-8.17173481 -4.12886572 -0.06099800
-8.17113113 -4.07022810 -0.26011321
-8.17108917 -4.07104492 -0.39600429
-8.17098141 -4.07099056 -0.25199941
-8.17062855 -4.07250214 -0.40669560
-8.17033195 -4.17486715 0.01731320
-8.17004585 -4.17302322 0.01500010
-8.17000008 -4.06699991 -0.29300001
-8.16991901 -4.07695961 -0.21499790
-8.16991615 -4.06995821 -0.25499740
-8.16926765 -4.07013321 -0.39301291
-8.16874695 -4.07395315 -0.22792530
-8.16871738 -4.06903315 -0.26299030
-8.16847706 -4.06973886 -0.25798351
-8.16846943 -4.12373257 -0.06899550
-8.16840267 -4.07220030 -0.23501161
-8.16799259 -4.12526798 -0.06608580
-8.16773319 -4.06886673 -0.38998729
-8.16722488 -4.07511187 -0.21800600
-8.16715717 -4.07466698 -0.22250110
-8.16711807 -4.17214298 0.01484760
-8.16702271 -4.06501150 -0.30900091
-8.16699982 -4.06500006 -0.30399999
-8.16699982 -4.06599998 -0.31299999
-8.16699982 -4.07200003 -0.41000000
-8.16660118 -4.07180119 -0.23798840
-8.16630840 -4.07268524 -0.22994751
-8.16619587 -4.07402992 -0.22531299
-8.16605282 -4.07099867 -0.40506199
-8.16604519 -4.06802225 -0.38700211
-8.16600037 -4.06799984 -0.26400000
-8.16590977 -4.12595415 -0.06399930
-8.16537476 -4.06859064 -0.39198381
-8.16527367 -4.06947184 -0.25367880
-8.16511917 -4.07184744 -0.23299479
-8.16486359 -4.07093239 -0.24099600
-8.16458607 -4.07016087 -0.40213209
-8.16448975 -4.07424402 -0.22101320
-8.16448879 -4.06724358 -0.38402301
-8.16399956 -4.17052269 0.01364510
-8.16357231 -4.12174702 -0.07117400
-8.16305828 -4.07102919 -0.23617050
-8.16300011 -4.06699991 -0.26899999
-8.16300011 -4.06700039 -0.38100001 
-8.16299248 -4.06999588 -0.24399979
-8.16282272 -4.17290926 0.01699960
-8.16235638 -4.07317781 -0.22400980
-8.16225815 -4.12308931 -0.06702010
-8.16209221 -4.06604671 -0.37800440
-8.16199970 -4.06599998 -0.27200001
-8.16169071 -4.16884279 0.01199950
-8.16147995 -4.06888151 -0.39914951
-8.16135883 -4.06480503 -0.29130021
-8.16130257 -4.06419802 -0.31067270
-8.16100883 -4.06900358 -0.24600030
-8.16088390 -4.06594181 -0.37499461
-8.16070938 -4.06646156 -0.38234890
-8.16064262 -4.07182169 -0.22699000
-8.16060162 -4.06988239 -0.24041981
-8.16057873 -4.06721878 -0.39068660
-8.15989208 -4.06775427 -0.39581040
-8.15944290 -4.06822062 -0.24901350
-8.15939808 -4.06369352 -0.35133711
-8.15919304 -4.06540918 -0.37710291
-8.15917873 -4.06642437 -0.38768521
-8.15865803 -4.06782675 -0.25205120
-8.15863705 -4.07081890 -0.22998980
-8.15838337 -4.06315613 -0.30849659
-8.15822315 -4.11969328 -0.07268030
-8.15820026 -4.06538439 -0.38043350
-8.15799999 -4.06400013 -0.28400001
-8.15746784 -4.06673479 -0.39497420
-8.15730667 -4.06765079 -0.25504079
-8.15718174 -4.06563997 -0.38410410
-8.15699959 -4.06400013 -0.29200000
-8.15682220 -4.06293249 -0.30580309
-8.15666676 -4.06333637 -0.28895280
-8.15649700 -4.06946039 -0.23648541
-8.15646935 -4.06460142 -0.27237901
-8.15637779 -4.06614399 -0.39043319
-8.15635204 -4.11817789 -0.07500320
-8.15627480 -4.07013702 -0.23200780
-8.15618324 -4.06834984 -0.24200730
-8.15602970 -4.06651306 -0.25803259
-8.15571785 -4.06481504 -0.38132671
-8.15490627 -4.06712723 -0.24945091
-8.15479946 -4.06290102 -0.35199139
-8.15472126 -4.16584873 0.00970490
-8.15433407 -4.06216621 -0.34901431
-8.15422440 -4.16811466 0.01400040
-8.15418053 -4.06908989 -0.23500520
-8.15408993 -4.12004471 -0.06900080
-8.15407848 -4.06503868 -0.26100251
-8.15384865 -4.06749249 -0.24493250
-8.15376282 -4.06363392 -0.37453449
-8.15363407 -4.06181717 -0.34598440
-8.15360069 -4.06399632 -0.37821689
-8.15332413 -4.06516171 -0.38901541
-8.15301418 -4.06200647 -0.30300051
-8.15300369 -4.06200171 -0.30600011
-8.15299988 -4.08400011 -0.16200000
-8.15299988 -4.06199980 -0.30899999
-8.15291405 -4.11886883 -0.07102440
-8.15240860 -4.06420374 -0.26301321
-8.15239716 -4.06819820 -0.23801160
-8.15234089 -4.06611872 -0.25329030
-8.15218830 -4.06187820 -0.35117480
-8.15174294 -4.06436968 -0.38703531
-8.15154934 -4.06208611 -0.28918681
-8.15112495 -4.06706238 -0.24100371
-8.15103817 -4.16525459 0.01030230
-8.15100002 -4.06099987 -0.32300001
-8.15100002 -4.06099987 -0.32600001
-8.15100002 -4.06099987 -0.32900000
-8.15100002 -4.06099987 -0.33199999
-8.15095806 -4.06397963 -0.26599860
-8.15073776 -4.11486721 -0.07699750
-8.15073013 -4.06386518 -0.38398731
-8.15004063 -4.06618309 -0.24789859
-8.14999962 -4.06300020 -0.26899999
-8.14991188 -4.06295586 -0.38099590
-8.14960384 -4.06504393 -0.25546220
-8.14951992 -4.06676054 -0.24298570
-8.14948082 -4.06383085 -0.26153910
-8.14933395 -4.11652517 -0.07388990
-8.14897442 -4.06298733 -0.27199909
-8.14876652 -4.06404686 -0.25865000
-8.14871788 -4.06522608 -0.25119269
-8.14867878 -4.08437204 -0.15948220
-8.14851189 -4.06275702 -0.37797740
-8.14849472 -4.06093836 -0.35262230
-8.14834881 -4.06041384 -0.34997511
-8.14795876 -4.06597948 -0.24599880
-8.14777946 -4.06189013 -0.27499259
-8.14721298 -4.16391754 0.00971680
-8.14718533 -4.11465740 -0.07582160
-8.14709282 -4.06448650 -0.25348020
-8.14700031 -4.06199980 -0.37500000
-8.14626694 -4.06513309 -0.24900819
-8.14616108 -4.06127644 -0.28792590
-8.14612198 -4.05987453 -0.33253431
-8.14565372 -4.06132555 -0.27702221
-8.14564705 -4.06288290 -0.26189250
-8.14555931 -4.06229305 -0.26662460
-8.14526176 -4.16058826 0.00646210
-8.14512253 -4.11279154 -0.07849200
-8.14500046 -4.08400011 -0.15899999
-8.14496231 -4.05935097 -0.32954079
-8.14473152 -4.06386614 -0.25199169
-8.14466572 -4.06033182 -0.28002289
-8.14443207 -4.06289101 -0.25942141
-8.14434433 -4.05939579 -0.35176930
-8.14427280 -4.06063461 -0.28304419
-8.14394379 -4.06314754 -0.25594181
-8.14377403 -4.06088448 -0.28606239
-8.14326286 -4.16191387 0.00826410
-8.14316368 -4.06057978 -0.28904131
-8.14286709 -4.11393309 -0.07499880
-8.14256954 -4.05978298 -0.29205629
-8.14203358 -4.05980682 -0.28133649
-8.14140892 -4.06220388 -0.25701290
-8.14128876 -4.05863619 -0.35305640
-8.14117622 -4.06142855 -0.26506561
-8.14113140 -4.15957403 0.00637320
-8.14081669 -4.05862474 -0.34985441
-8.14069557 -4.06005526 -0.27357340
-8.13969326 -4.06184626 -0.25999019
-8.13957787 -4.10929251 -0.08300590
-8.13940334 -4.05820131 -0.29701471
-8.13895607 -4.05797815 -0.29999840
-8.13889694 -4.15769434 0.00466160
-8.13859463 -4.05729771 -0.34602529
-8.13858986 -4.05759954 -0.32723781
-8.13851261 -4.05775642 -0.30298179
-8.13822269 -4.06111193 -0.26300719
-8.13804436 -4.05702257 -0.30600169
-8.13799953 -4.05800009 -0.33399999
-8.13775730 -4.05687952 -0.31999040
-8.13771534 -4.05735731 -0.32302839
-8.13769722 -4.10975790 -0.08115650
-8.13755608 -4.05677938 -0.31698269
-8.13751793 -4.05941153 -0.27587670
-8.13749981 -4.05725002 -0.34302109
-8.13744164 -4.16022587 0.00800040
-8.13739777 -4.11120081 -0.07800380
-8.13738441 -4.05848598 -0.29022709
-8.13708878 -4.05704451 -0.34000370
-8.13700008 -4.15600014 0.00300000
-8.13700008 -4.05999947 -0.26600000
-8.13700008 -4.05700064 -0.30899999
-8.13700008 -4.05700064 -0.31400001
-8.13700008 -4.05700064 -0.33700001
-8.13699150 -4.05877638 -0.28416061
-8.13677692 -4.15846443 0.00616320
-8.13592911 -4.05768299 -0.29250920
-8.13582420 -4.05739737 -0.29872021
-8.13549805 -4.05849123 -0.28698549
-8.13527775 -4.05629683 -0.31818941
-8.13452053 -4.05642080 -0.34332711
-8.13426495 -4.10713387 -0.08600280
-8.13421631 -4.05716658 -0.29450071
-8.13410854 -4.05642748 -0.30699801
-8.13409424 -4.05655909 -0.30355501
-8.13364506 -4.05695391 -0.35297841
-8.13331318 -4.05778074 -0.27861229
-8.13324356 -4.05582476 -0.31647709
-8.13272190 -4.05836058 -0.27402440
-8.13245583 -4.05715084 -0.28899449
-8.13237381 -4.05588770 -0.34575090
-8.13230610 -4.05592394 -0.32391530
-8.13218403 -4.05674553 -0.29663321
-8.13206768 -4.05588293 -0.33853790
-8.13201237 -4.05602980 -0.34861600
-8.13200188 -4.10900164 -0.08000000
-8.13192177 -4.05565739 -0.32059869
-8.13191795 -4.05708885 -0.28157699
-8.13166809 -4.05596352 -0.32964700
-8.13150597 -4.05726385 -0.28452069
-8.13045311 -4.05650663 -0.29275429
-8.13020325 -4.05530071 -0.31255990
-8.13000011 -4.15600014 0.00500000
-8.12992954 -4.05546045 -0.34117609
-8.12986755 -4.10393333 -0.08899860
-8.12959862 -4.05562639 -0.30190271
-8.12954712 -4.05591536 -0.29886079
-8.12945271 -4.10619116 -0.08481240
-8.12921333 -4.05610657 -0.28900760
-8.12899971 -4.15199995 0.00000000
-8.12871742 -4.05512476 -0.32734519
-8.12865448 -4.05488539 -0.34399009
-8.12795925 -4.05597973 -0.29399851
-8.12784767 -4.05489206 -0.33541980
-8.12760067 -4.05580091 -0.29698539
-8.12745190 -4.05462170 -0.32451311
-8.12730885 -4.05515337 -0.30001140
-8.12722492 -4.05477715 -0.33837980
-8.12709045 -4.10604620 -0.08300090
-8.12698746 -4.05444622 -0.31984901
-8.12681961 -4.10487413 -0.08647220
-8.12676525 -4.05488253 -0.30299121
-8.12625885 -4.05460453 -0.34970021
-8.12566948 -4.10299921 -0.08890430
-8.12548447 -4.15047407 -0.00093260
-8.12522602 -4.05411243 -0.34500960
-8.12500000 -4.05399990 -0.31099999
-8.12500000 -4.05399990 -0.31400001
-8.12499714 -4.05399847 -0.31699991
-8.12492275 -4.05396080 -0.32199690
-8.12490845 -4.10195398 -0.09199900
-8.12483406 -4.05391693 -0.34199300
-8.12483311 -4.05391645 -0.32499331
-8.12467766 -4.05433798 -0.32802740
-8.12408543 -4.05404234 -0.33700359
-8.12399960 -4.05399990 -0.33399999
-8.12236786 -4.10189247 -0.08999540
-8.12199974 -4.15199995 0.00300000
-8.12188244 -4.14905643 -0.00164390
-8.12177753 -4.10388803 -0.08599760
-8.12150860 -4.15053082 0.00090210
-8.11973572 -4.09986687 -0.09399690
-8.11735153 -4.10005999 -0.09137630
-8.11660004 -4.10079861 -0.08899560
-8.11482430 -4.09691143 -0.09699790
-8.11433697 -4.09796381 -0.09433610
-8.11400127 -4.14400005 -0.00500000
-8.11299992 -4.14699984 -0.00100000
-8.11203766 -4.09693623 -0.09495810
-8.11104202 -4.09802151 -0.09200050
-8.10970879 -4.09435797 -0.10000880
-8.10834312 -4.14225674 -0.00588250
-8.10773087 -4.09465981 -0.09796970
-8.10592842 -4.14047480 -0.00800090
-8.10549164 -4.09524822 -0.09400570
-8.10499954 -4.14300013 -0.00300000
-8.10490799 -4.09195375 -0.10299880
-8.10205650 -4.04868412 -0.28267950
-8.10102463 -4.13871861 -0.00904450
-8.10099983 -4.04800034 -0.28500000
-8.10083103 -4.09264278 -0.09825390
-8.09995842 -4.08997869 -0.10499950
-8.09835052 -4.13717937 -0.01100050
-8.09786510 -4.13993073 -0.00599990
-8.09615040 -4.09027672 -0.10043750
-8.09610367 -4.13831663 -0.00761960
-8.09568310 -4.08828592 -0.10597010
-8.09514427 -4.04762793 -0.28222471
-8.09394932 -4.13618517 -0.01061160
-8.09349823 -4.08837509 -0.10433320
-8.09269714 -4.15043879 0.01244240
-8.09187031 -4.13293409 -0.01399980
-8.09178448 -4.08574343 -0.10926850
-8.09117889 -4.13609219 -0.00900020
-8.09099960 -4.04699993 -0.28200001
-8.09086704 -4.08793306 -0.10299830
-8.09000015 -4.14799976 0.01000000
-8.09000015 -4.07200003 -0.14800000
-8.08984947 -4.08596087 -0.10737850
-8.08902359 -4.13269758 -0.01358430
-8.08752823 -4.08360815 -0.11244790
-8.08700752 -4.07000399 -0.15000010
-8.08645821 -4.13219643 -0.01352340
-8.08623981 -4.14865589 0.01191860
-8.08612919 -4.08606529 -0.10600170
-8.08557701 -4.08229065 -0.11400810
-8.08500004 -4.13000011 -0.01700000
-8.08421803 -4.13311148 -0.01200030
-8.08399963 -4.06799984 -0.15300000
-8.08235836 -4.14655972 0.01025890
-8.08160400 -4.08380032 -0.10799470
-8.08113003 -4.08006573 -0.11700190
-8.08029366 -4.08120012 -0.11336920
-8.07999992 -4.07000017 -0.14800000
-8.07966232 -4.08213902 -0.11034010
-8.07908440 -4.06838369 -0.15042201
-8.07800007 -4.12900019 -0.01500000
-8.07709122 -4.08104563 -0.11100130
-8.07700443 -4.07800198 -0.11900010
-8.07654095 -4.07974672 -0.11503260
-8.07600784 -4.06800365 -0.15000010
-8.07422256 -4.07849550 -0.11608630
-8.07300186 -4.07600117 -0.12200000
-8.07226467 -4.07913399 -0.11400370
-8.07199955 -4.06599998 -0.15300000
-8.07100010 -4.12200022 -0.02200000
-8.07011795 -4.07552004 -0.12081050
-8.06900024 -4.17299986 0.05100000
-8.06900024 -4.07399988 -0.12500000
-8.06822205 -4.07611227 -0.11700320
-8.06754398 -4.12199020 -0.02114840
-8.06700039 -4.17500019 0.05400000
-8.06652260 -4.07349348 -0.12398110
-8.06647015 -4.17325354 0.05211230
-8.06486607 -4.07193232 -0.12799791
-8.06426430 -4.11913490 -0.02500080
-8.06404114 -4.07402086 -0.12000060
-8.06316185 -4.12042093 -0.02209490
-8.06299973 -4.12200022 -0.02000000
-8.06248188 -4.07186794 -0.12538540
-8.06232166 -4.07075119 -0.12949079
-8.06000042 -4.16800022 0.04800000
-8.05991650 -4.07195711 -0.12199870
-8.05799961 -4.17000008 0.05100000
-8.05778599 -4.11688280 -0.02593230
-8.05686378 -4.06999731 -0.12614091
-8.05640507 -4.06720448 -0.13300671
-8.05548668 -4.11824846 -0.02300140
-8.05399990 -4.03399992 -0.30700001
-8.05335522 -4.03417826 -0.31001371
-8.05300045 -4.03399992 -0.31299999
-8.05213547 -4.06506824 -0.13600230
-8.05148983 -4.11594152 -0.02475570
-8.05142879 -4.06663036 -0.13184680
-8.05126476 -4.06813383 -0.12800419
-8.05125332 -4.11347342 -0.02968450
-8.04853344 -4.11427212 -0.02600170
-8.04822159 -4.06311131 -0.13900380
-8.04700565 -4.06455898 -0.13390461
-8.04698563 -4.11261272 -0.02848750
-8.04695129 -4.06597567 -0.13099919
-8.04519176 -4.11078548 -0.03156970
-8.04487038 -4.10893440 -0.03399950
-8.04466057 -4.06133366 -0.14201170
-8.04457092 -4.03249311 -0.31065640
-8.04353523 -4.03225565 -0.30623120
-8.04275894 -4.10966969 -0.03206500
-8.04265404 -4.06290674 -0.13492510
-8.04199982 -4.03200006 -0.30899999
-8.04199982 -4.03200006 -0.31200001
-8.04182434 -4.11090994 -0.02899940
-8.04152203 -4.06121635 -0.13895661
-8.04133987 -4.05966616 -0.14398821
-8.03840160 -4.06120253 -0.13600680
-8.03800011 -4.10599995 -0.03700000
-8.03778076 -4.05788946 -0.14699601
-8.03707314 -4.05923891 -0.14162590
-8.03642178 -4.10735083 -0.03277880
-8.03427887 -4.05742693 -0.14539850
-8.03426552 -4.05913401 -0.13900460
-8.03399944 -4.05599976 -0.15000001
-8.03335857 -4.10618687 -0.03332760
-8.03100014 -4.10200024 -0.03900000
-8.03096867 -4.05639935 -0.14598100
-8.03039455 -4.05720043 -0.14200699
-8.03012848 -4.05406475 -0.15300250
-8.02900028 -4.10400009 -0.03500000
-8.02849674 -4.10112381 -0.03951220
-8.02669430 -4.05584526 -0.14399450
-8.02649403 -4.05224943 -0.15500949
-8.02617359 -4.05354309 -0.15074840
-8.02471161 -4.10054731 -0.03871500
-8.02464390 -4.05410433 -0.14800090
-8.02422047 -4.09911203 -0.04200110
-8.02300167 -4.05100107 -0.15800010
-8.02217197 -4.05182695 -0.15295599
-8.02200031 -4.10099983 -0.03700000
-8.01999950 -4.04899931 -0.16100000
-8.01986599 -4.05193281 -0.14999750
-8.01867294 -4.09671783 -0.04366390
-8.01861668 -4.09838963 -0.03954420
-8.01815510 -4.05006123 -0.15601550
-8.01711559 -4.04803705 -0.16282950
-8.01630592 -4.05015516 -0.15300590
-8.01593304 -4.09673882 -0.04158960
-8.01438332 -4.04834747 -0.15859470
-8.01399994 -4.14499998 0.03400000
-8.01327133 -4.04613733 -0.16600560
-8.01269436 -4.04884529 -0.15499410
-8.01166344 -4.09233952 -0.04800400
-8.01126957 -4.04638529 -0.16284680
-8.01075840 -4.04449797 -0.16839540
-8.01068687 -4.04726410 -0.15870520
-8.01005268 -4.09290886 -0.04583360
-8.01000023 -4.14599991 0.03700000
-8.00913239 -4.09406805 -0.04300070
-8.00791931 -4.14343834 0.03403930
-8.00686455 -4.04293203 -0.17199710
-8.00684357 -4.04313278 -0.16931640
-8.00679398 -4.09111786 -0.04746450
-8.00653553 -4.04442549 -0.16521910
-8.00622177 -4.04511261 -0.16100450
-8.00599957 -4.14699984 0.03900000
-8.00578594 -4.13988972 0.03099920
-8.00577927 -4.08888769 -0.05099860
-8.00424194 -4.04184103 -0.17290170
-8.00300217 -4.09100103 -0.04500000
-8.00277233 -4.04388523 -0.16399530
-8.00263500 -4.04220867 -0.16799490
-8.00146770 -4.14172506 0.03399770
-8.00121021 -4.08870363 -0.04895110
-8.00119114 -4.04112291 -0.17249610
-8.00111294 -4.14482689 0.03829720
-8.00079823 -4.08643150 -0.05257260
-8.00063229 -4.03986073 -0.17525190
-8.00000000 -4.14699984 0.04200000
-7.99974060 -4.04186869 -0.16599460
-7.99900007 -4.05100012 -0.51400000
-7.99833822 -4.13829613 0.03111030
-7.99803448 -4.08737850 -0.04986450
-7.99777174 -4.03818560 -0.17903391
-7.99718237 -4.14209414 0.03600080
-7.99682283 -4.13590813 0.02799940
-7.99656105 -4.14394331 0.03950570
-7.99640179 -4.04020309 -0.16900849
-7.99427748 -4.13672352 0.03015910
-7.99427366 -4.08475113 -0.05270390
-7.99390936 -4.03595495 -0.18299790
-7.99326515 -4.08313608 -0.05600190
-7.99286461 -4.03893232 -0.17199710
-7.99200010 -4.05100012 -0.51700002
-7.99110794 -4.03754950 -0.17423430
-7.99106169 -4.14090252 0.03717110
-7.99086761 -4.08493280 -0.05099920
-7.99070406 -4.03435564 -0.18601640
-7.99047470 -4.03563309 -0.18020850
-7.98997021 -4.13429022 0.02860590
-7.98889923 -4.13930845 0.03497690
-7.98813629 -4.13107014 0.02500040
-7.98800230 -4.03483582 -0.17996760
-7.98791838 -4.03295898 -0.18799810
-7.98708773 -4.08004475 -0.05900060
-7.98684740 -4.03397322 -0.18304290
-7.98631668 -4.03516006 -0.17700700
-7.98628759 -4.08132648 -0.05563360
-7.98513460 -4.03206778 -0.19100320
-7.98425817 -4.03326130 -0.18296190
-7.98418188 -4.13209391 0.02800060
-7.98313236 -4.03006697 -0.19400319
-7.98241615 -4.12931967 0.02435920
-7.98199987 -4.13800001 0.03600000
-7.98108625 -4.07704449 -0.06200070
-7.98099947 -4.08599997 -0.04300000
-7.98087645 -4.07815838 -0.05872140
-7.98078251 -4.03129482 -0.18812560
-7.98063898 -4.02881813 -0.19699110
-7.98030853 -4.03215599 -0.18300711
-7.98000002 -4.13299990 0.03100000
-7.97900009 -4.12699986 0.02200000
-7.97853041 -4.07827187 -0.05700380
-7.97816086 -4.02902937 -0.19332500
-7.97778368 -4.02789164 -0.19899461
-7.97768402 -4.03084087 -0.18599260
-7.97689819 -4.12771177 0.02386580
-7.97566509 -4.02976799 -0.18923950
-7.97535467 -4.07418108 -0.06400290
-7.97528696 -4.08479643 -0.04310160
-7.97522545 -4.02611399 -0.20200570
-7.97499990 -4.08300018 -0.04600000
-7.97461367 -4.13066053 0.02980740
-7.97408247 -4.02693939 -0.19748980
-7.97399950 -4.13299990 0.03300000
-7.97323990 -4.07485580 -0.06162500
-7.97262335 -4.07531834 -0.05900460
-7.97239876 -4.02520180 -0.20501029
-7.97235489 -4.02817965 -0.19100849
-7.97232723 -4.02718592 -0.19497640
-7.97163343 -4.12863207 0.02846990
-7.97099972 -4.08400011 -0.04300000
-7.97025776 -4.13116217 0.03149060
-7.97013474 -4.07106876 -0.06700110
-7.96999979 -4.02400017 -0.20800000
-7.96984529 -4.02502489 -0.20103820
-7.96963835 -4.02681828 -0.19399120
-7.96784544 -4.07106256 -0.06581770
-7.96747780 -4.02418900 -0.20244370
-7.96714067 -4.02507162 -0.19600350
-7.96677828 -4.07288647 -0.06199830
-7.96599960 -4.02199984 -0.21300000
-7.96588135 -4.06940222 -0.06813380
-7.96500015 -4.12900019 0.03000000
-7.96485519 -4.02318668 -0.20392030
-7.96476841 -4.07125998 -0.06387820
-7.96426821 -4.02413607 -0.19900671
-7.96353054 -4.02026796 -0.21601440
-7.96314049 -4.06951189 -0.06664430
-7.96199942 -4.12400007 0.02500000
-7.96155643 -4.02277565 -0.20198880
-7.96112585 -4.01906395 -0.21900350
-7.96080637 -4.02152348 -0.20529000
-7.96074438 -4.06782389 -0.06882240
-7.96049833 -4.02029610 -0.21285070
-7.95959854 -4.06579447 -0.07299630
-7.95900726 -4.01800394 -0.22100019
-7.95844030 -4.12231255 0.02383860
-7.95700312 -4.01700211 -0.22400010
-7.95644808 -4.06547642 -0.07148050
-7.95599985 -4.12400007 0.02800000
-7.95526218 -4.06713390 -0.06800220
-7.95516443 -4.12242794 0.02572720
-7.95499992 -4.11399984 0.01400000
-7.95499802 -4.01599884 -0.22700000
-7.95440292 -4.01812124 -0.21492530
-7.95413351 -4.06306839 -0.07500130
-7.95411301 -4.01773739 -0.21741180
-7.95399952 -4.01900005 -0.20999999
-7.95395470 -4.11997700 0.02199990
-7.95290422 -4.01495171 -0.22999720
-7.95273304 -4.01578522 -0.22528221
-7.95238113 -4.01768732 -0.21298340
-7.95099974 -4.11499977 0.01700000
-7.95083141 -4.01391459 -0.23199511
-7.95050049 -4.06133080 -0.07630500
-7.95039797 -4.01582623 -0.22206099
-7.95036840 -4.06377602 -0.07139820
-7.95032644 -4.11178112 0.01264200
-7.95017481 -4.01708841 -0.21600480
-7.94873667 -4.05986500 -0.07799740
-7.94866657 -4.01333714 -0.23501970
-7.94839954 -4.11888266 0.02314750
-7.94808197 -4.01604128 -0.21900231
-7.94773722 -4.10986423 0.01099960
-7.94735527 -4.01218033 -0.23801070
-7.94675493 -4.11702490 0.02073410
-7.94661617 -4.01298857 -0.23302659
-7.94600773 -4.01500368 -0.22100019
-7.94600058 -4.01200008 -0.24100000
-7.94556475 -4.11064720 0.01271510
-7.94486237 -4.01413965 -0.22432490
-7.94395924 -4.06097889 -0.07299960
-7.94304419 -4.05702305 -0.08100050
-7.94299984 -4.11100006 0.01400000
-7.94291878 -4.01228142 -0.23169620
-7.94282627 -4.01174927 -0.23441510
-7.94256210 -4.05972147 -0.07525610
-7.94217348 -4.11394358 0.01802150
-7.94199467 -4.01080894 -0.23909330
-7.94190359 -4.01295137 -0.22699730
-7.94172382 -4.11529112 0.02055760
-7.94162130 -4.10758209 0.00967140
-7.94099998 -4.00899982 -0.24900000
-7.94069767 -4.10885477 0.01178250
-7.94057178 -4.05694151 -0.07999520
-7.94026327 -4.10613585 0.00800030
-7.94024563 -4.05572510 -0.08227660
-7.93969727 -4.01184750 -0.22899130
-7.93941498 -4.01005363 -0.23698440
-7.93939924 -4.11520720 0.02200110
-7.93899965 -4.00799990 -0.25200000
-7.93866348 -4.05833912 -0.07600630
-7.93800020 -4.11100006 0.01600000
-7.93757296 -4.05429220 -0.08400610
-7.93704319 -4.01102209 -0.23200120
-7.93621063 -4.00748777 -0.25025719
-7.93520927 -4.10534811 0.00857910
-7.93499947 -4.10699987 0.01100000
-7.93485832 -4.00892830 -0.23499580
-7.93400049 -4.00600004 -0.25999999
-7.93359900 -4.05579472 -0.07899600
-7.93300009 -4.10200024 0.00500000
-7.93291426 -4.00689268 -0.24823660
-7.93239021 -4.00590372 -0.39732191
-7.93226528 -4.05213547 -0.08600290
-7.93225241 -4.05400038 -0.08083050
-7.93199968 -4.00799990 -0.23700000
-7.93178272 -4.00389051 -0.26499271
-7.93100071 -4.11100006 0.01900000
-7.93056488 -4.05244017 -0.08356540
-7.93053007 -4.00326777 -0.26801789
-7.93042135 -4.10320711 0.00725300
-7.93000507 -4.03200245 -0.13300011
-7.92999935 -4.10799980 0.01400000
-7.92999935 -4.10400009 -0.65700001
-7.92947483 -4.00323963 -0.27101621
-7.92868328 -4.05032492 -0.08733650
-7.92865086 -4.05282164 -0.08099640
-7.92856598 -4.00301504 -0.26621771
-7.92799997 -4.00600004 -0.24600001
-7.92699957 -4.10300016 0.00800000
-7.92699957 -4.00199986 -0.27900001
-7.92624426 -4.00290060 -0.26295400
-7.92617607 -4.00108862 -0.28200629
-7.92600012 -4.03299999 -0.13000000
-7.92600012 -4.00500011 -0.24800000
-7.92591095 -4.00242805 -0.26852190
-7.92499065 -4.00099516 -0.28499961
-7.92484426 -4.10180569 -0.65562803
-7.92456961 -4.02930641 -0.13604410
-7.92434549 -4.04949141 -0.08709010
-7.92399979 -4.10699987 0.01600000
-7.92399979 -4.10400009 -0.66000003
-7.92348862 -4.05025005 -0.08400520
-7.92317820 -4.00009060 -0.29000649
-7.92305088 -4.00101805 -0.27809799
-7.92282152 -4.04690886 -0.09199790
-7.92247725 -4.10490084 0.01277050
-7.92216682 -4.00008392 -0.29300621
-7.92208862 -4.03104544 -0.13300151
-7.92205906 -4.10165167 -0.65675002
-7.92200041 -4.00299978 -0.25700000
-7.92191076 -4.00209236 -0.26047549
-7.92183638 -4.02744150 -0.13904969
-7.92157364 -4.00035954 -0.28643411
-7.92143011 -3.99998713 -0.28166819
-7.92113781 -4.00142717 -0.26657870
-7.92100000 -3.99899983 -0.29800001
-7.92098713 -4.00152731 -0.26354590
-7.91999960 -3.99880028 -0.29401249
-7.91999960 -3.99799967 -0.30599999
-7.91999960 -4.09899998 -0.65300000
-7.91973543 -3.99786615 -0.30898970
-7.91942120 -3.99940324 -0.28784221
-7.91923714 -4.00004339 -0.27958891
-7.91917753 -3.99808908 -0.31200701
-7.91882086 -4.00090933 -0.26499400
-7.91882086 -3.99790883 -0.31499290
-7.91844559 -4.04675579 -0.08895700
-7.91826391 -4.02913380 -0.13600449
-7.91825151 -3.99812651 -0.31801009
-7.91808796 -4.04404497 -0.09500100
-7.91779089 -3.99928498 -0.28382030
-7.91775990 -4.02645731 -0.14051110
-7.91772175 -4.00085878 -0.26799059
-7.91767406 -4.09938335 -0.65511692
-7.91700077 -4.10238171 0.01133130
-7.91655207 -3.99791861 -0.29630831
-7.91558886 -3.99834752 -0.29067570
-7.91499949 -3.99899983 -0.27599999
-7.91499949 -4.09899998 -0.65600002
-7.91486454 -4.04443169 -0.09240510
-7.91479015 -4.10084677 0.01000610
-7.91472960 -4.02686262 -0.13899530
-7.91408491 -3.99674344 -0.30769950
-7.91403818 -3.99686074 -0.31024870
-7.91395807 -3.99725604 -0.29490250
-7.91386795 -4.04493284 -0.08999850
-7.91386604 -3.99659538 -0.30468461
-7.91385698 -3.99892735 -0.27899489
-7.91291428 -4.04195642 -0.09699890
-7.91200066 -4.09499979 0.00300000
-7.91191483 -3.99795580 -0.28399700
-7.91181612 -4.04292631 -0.09407480
-7.91138887 -3.99619985 -0.30789310
-7.91108704 -3.99704361 -0.28700319
-7.91104221 -3.99601603 -0.31578800
-7.91099930 -4.02500010 -0.14100000
-7.91093159 -4.09749222 0.00683100
-7.90990162 -3.99695015 -0.28999639
-7.90981960 -4.09090662 -0.00299990
-7.90903997 -4.09283686 0.00060160
-7.90886402 -4.09992933 0.01099980
-7.90882683 -4.04291248 -0.09199800
-7.90844297 -3.99548268 -0.31066379
-7.90843010 -3.99525928 -0.31403881
-7.90840864 -4.09839106 0.00903250
-7.90809202 -4.03904724 -0.10000120
-7.90799952 -4.08300018 -0.01400000
-7.90799952 -3.99600029 -0.29499999
-7.90766430 -4.04198790 -0.09408390
-7.90740347 -4.09520817 0.00500030
-7.90700054 -3.99499989 -0.30300000
-7.90660381 -4.04002905 -0.09790250
-7.90644264 -3.99522328 -0.30601710
-7.90635395 -3.99517870 -0.30901381
-7.90600014 -3.99499989 -0.31700000
-7.90575981 -4.03826427 -0.10081620
-7.90551376 -4.09174871 0.00000000
-7.90471792 -4.08997345 -0.00235110
-7.90437508 -4.09523678 0.00614430
-7.90412998 -4.03990698 -0.09711820
-7.90299749 -4.03699875 -0.10300000
-7.90295553 -4.08697653 -0.00600000
-7.90233517 -4.08183718 -0.01420830
-7.90199995 -4.07999992 -0.01700000
-7.90199995 -4.01100016 -0.46900001
-7.90179873 -4.08856821 -0.00327650
-7.90160418 -4.09579515 0.00799960
-7.90002012 -4.03585148 -0.10361170
-7.90000057 -4.09200001 0.00200000
-7.89917898 -4.00909090 -0.46601060
-7.89904881 -4.08802557 -0.00300000
-7.89899015 -4.09295321 0.00449640
-7.89856052 -4.03744125 -0.09927920
-7.89839602 -4.03420210 -0.10600530
-7.89710045 -4.00937462 -0.46742660
-7.89699984 -4.08099937 -0.01400000
-7.89660597 -4.03530550 -0.10275910
-7.89599943 -4.08300018 -0.00900000
-7.89599943 -4.00799990 -0.46300000
-7.89526558 -4.07889318 -0.01681520
-7.89421797 -4.03246450 -0.10720800
-7.89400005 -4.09200001 0.00500000
-7.89361811 -4.03531551 -0.10100790
-7.89299965 -4.08799982 0.00000000
-7.89213943 -4.00773478 -0.46556199
-7.89200068 -4.08500004 -0.00600000
-7.89162064 -4.03310299 -0.10455910
-7.89100027 -4.00899982 -0.46900001
-7.89015913 -4.08783007 0.00058680
-7.88913679 -4.03307056 -0.10300180
-7.88899994 -4.07999992 -0.01100000
-7.88886452 -4.02993155 -0.11099810
-7.88817930 -4.00709152 -0.46601060
-7.88657999 -4.08038139 -0.00968530
-7.88643122 -4.03067589 -0.10746350
-7.88600016 -4.08799982 0.00200000
-7.88600016 -4.08500004 -0.00300000
-7.88600016 -4.05299997 -0.05700000
-7.88500071 -4.00600004 -0.46300000
-7.88457251 -4.02729273 -0.11400830
-7.88399935 -4.08099937 -0.00800000
-7.88284826 -4.02791452 -0.11198600
-7.88222361 -4.07611609 -0.01400040
-7.88099957 -4.02199984 -0.12500000
-7.88099670 -4.02899837 -0.10900000
-7.88081789 -4.05152798 -0.05788810
-7.88044643 -4.02522850 -0.11600660
-7.88000679 -4.07660198 -0.01258360
-7.88000059 -4.05000019 -0.06000000
-7.88000059 -4.00600004 -0.17700000
-7.87900019 -4.08099937 -0.00600000
-7.87815523 -4.02633047 -0.11309700
-7.87799978 -4.08400011 -0.00100000
-7.87704515 -4.07702398 -0.01100010
-7.87699986 -4.12699986 0.05800000
-7.87699986 -4.01999998 -0.12800001
-7.87699986 -4.01399994 -0.14700000
-7.87687111 -4.02693462 -0.11099820
-7.87677431 -4.00556183 -0.17669509
-7.87554026 -4.12436008 0.05562130
-7.87521410 -4.07311153 -0.01700050
-7.87511730 -4.07536364 -0.01259940
-7.87500000 -4.05100012 -0.05700000
-7.87454271 -4.01391983 -0.14580791
-7.87447786 -4.02347279 -0.11699470
-7.87400007 -4.04699993 -0.06300000
-7.87358284 -4.02229691 -0.12200900
-7.87300062 -4.00600004 -0.17399999
-7.87260294 -4.02479696 -0.11399420
-7.87209988 -4.07302856 -0.01531580
-7.87200022 -4.12099981 0.05300000
-7.87155962 -4.07127905 -0.01806980
-7.87100029 -4.07999992 -0.00300000
-7.87083721 -4.04763126 -0.06106480
-7.87049246 -4.01928043 -0.12692320
-7.87032843 -4.02148581 -0.12071580
-7.87021875 -4.07803297 -0.00717080
-7.86999989 -4.01399994 -0.14300001
-7.86899948 -4.06899977 -0.02000000
-7.86842203 -4.02049208 -0.12316140
-7.86841106 -4.07605028 -0.01030470
-7.86831045 -4.02215862 -0.11700460
-7.86815405 -4.07049847 -0.01796640
-7.86802340 -4.02107620 -0.11930640
-7.86800051 -4.12200022 0.05500000
-7.86769485 -4.07809258 -0.00507140
-7.86731291 -4.07685137 -0.00785380
-7.86575222 -4.01838446 -0.12701210
-7.86505556 -4.07575035 -0.00848370
-7.86499977 -4.07399988 -0.01200000
-7.86446857 -4.07672453 -0.00599960
-7.86400032 -4.12300014 0.05800000
-7.86400032 -4.04500008 -0.06300000
-7.86386538 -4.01993084 -0.11999790
-7.86326361 -4.01874304 -0.12405060
-7.86299992 -4.07000017 -0.01700000
-7.86287785 -4.07414341 -0.01018870
-7.86199999 -4.06599998 -0.02300000
-7.86184883 -4.01592255 -0.12999751
-7.86104631 -4.12371778 0.05943680
-7.85969925 -4.06485510 -0.02373950
-7.85960722 -4.01620960 -0.12820201
-7.85926819 -4.01813793 -0.12200420
-7.85799980 -4.07299995 -0.00900000
-7.85790873 -4.01395273 -0.13299841
-7.85748005 -4.12067413 0.05671880
-7.85737467 -4.06538343 -0.02135580
-7.85586786 -4.06293201 -0.02499960
-7.85533524 -4.01400661 -0.13015559
-7.85517597 -4.01609039 -0.12500280
-7.85500002 -4.11899996 0.05500000
-7.85423279 -4.06500530 -0.02014340
-7.85400534 -4.01200294 -0.13500009
-7.85240173 -4.01351786 -0.12950280
-7.85099983 -4.11999989 0.05800000
-7.85099983 -4.06699991 -0.01700000
-7.85045433 -4.06210709 -0.02397950
-7.85000229 -4.01000166 -0.13800000
-7.84966803 -4.01203489 -0.13141701
-7.84960222 -4.05979395 -0.02799860
-7.84608698 -4.00804377 -0.14100160
-7.84600067 -4.10799980 0.04500000
-7.84570265 -4.00959921 -0.13581160
-7.84499931 -4.11399984 0.05300000
-7.84453201 -4.06327581 -0.02000140
-7.84400177 -4.01000118 -0.13300000
-7.84399986 -4.06599998 -0.01400000
-7.84399986 -4.05000019 -0.04100000
-7.84395552 -4.05997658 -0.02499990
-7.84393406 -4.05756903 -0.02921770
-7.84286308 -4.06358957 -0.01805210
-7.84267282 -4.10663748 0.04445690
-7.84253263 -4.00835228 -0.13697460
-7.84234619 -4.00617743 -0.14400630
-7.84199953 -4.11499977 0.05500000
-7.84184313 -4.06446028 -0.01552120
-7.84100008 -4.10799980 0.04700000
-7.84039783 -4.10492086 0.04333440
-7.84016323 -4.04851723 -0.04231660
-7.83994961 -4.11121321 0.05151390
-7.83912277 -4.05433416 -0.03186860
-7.83899975 -4.00400019 -0.14600000
-7.83899975 -4.05700064 -0.62199998
-7.83838415 -4.06080961 -0.02119860
-7.83835173 -4.04718208 -0.04400200
-7.83786345 -4.05693007 -0.02799950
-7.83783484 -4.10291338 0.04199910
-7.83713531 -4.05306911 -0.03300060
-7.83687067 -4.06193256 -0.01699970
-7.83673143 -4.00586271 -0.13899520
-7.83665180 -4.10881710 0.04999780
-7.83623457 -4.00423908 -0.14404801
-7.83602333 -4.06060743 -0.01964750
-7.83601761 -4.05574703 -0.62083048
-7.83500004 -4.00799990 -0.51800001
-7.83400059 -4.04800034 -0.04200000
-7.83400059 -3.98899984 -0.45199999
-7.83385611 -4.05957556 -0.02048670
-7.83318281 -4.11009645 0.05200120
-7.83300018 -4.04400015 -0.04700000
-7.83291721 -4.00395775 -0.14099850
-7.83259058 -4.05833626 -0.02270630
-7.83249569 -4.05515146 -0.62137562
-7.83246851 -4.10372210 0.04399700
-7.83232689 -4.00708246 -0.51651609
-7.83205032 -4.05302620 -0.03000020
-7.83202028 -3.98801088 -0.44900119
-7.83199978 -4.00099993 -0.15200000
-7.83186865 -4.05693197 -0.02499960
-7.83160973 -4.10167360 0.04208400
-7.83099985 -4.05600023 -0.62400001
-7.83086872 -4.04993200 -0.03599940
-7.83063936 -4.00281811 -0.14274921
-7.83048868 -4.05151320 -0.03233470
-7.82999945 -3.98699999 -0.44700000
-7.82999945 -4.05299997 -0.61799997
-7.82985067 -4.10804605 0.05028660
-7.82981682 -3.98781514 -0.45024151
-7.82979584 -4.05841208 -0.02000200
-7.82971191 -4.10525846 0.04783750
-7.82900000 -4.09899998 0.03900000
-7.82847786 -4.05417061 -0.62202841
-7.82813883 -4.05635929 -0.02373750
-7.82735348 -4.04518270 -0.04400200
-7.82699966 -3.97300029 -0.34400001
-7.82699966 -4.00400019 -0.51200002
-7.82682562 -3.99791074 -0.15699650
-7.82680321 -3.99961185 -0.15119980
-7.82598066 -3.97299099 -0.33999920
-7.82584476 -4.04894209 -0.03544000
-7.82578373 -4.04988813 -0.03299910
-7.82569790 -4.10533524 0.04829840
-7.82560158 -4.05379295 -0.02799860
-7.82547522 -3.97173309 -0.33197770
-7.82530642 -3.97215557 -0.33501309
-7.82518816 -3.97209549 -0.32900789
-7.82501125 -3.97200561 -0.32100049
-7.82500029 -3.97199988 -0.31600001
-7.82500029 -3.97199988 -0.32400000
-7.82460165 -4.04679346 -0.03899800
-7.82415009 -4.04300785 -0.04635680
-7.82399988 -4.09899998 0.04100000
-7.82399988 -3.98699999 -0.45199999
-7.82399988 -4.00600004 -0.51800001
-7.82399988 -4.05200005 -0.62099999
-7.82393932 -4.05471468 -0.02421480
-7.82346821 -3.99672794 -0.15998910
-7.82299948 -4.02700043 -0.07600000
-7.82293940 -3.99715161 -0.15560810
-7.82278728 -4.05348015 -0.02624410
-7.82261324 -3.97159576 -0.31870890
-7.82255459 -4.00467873 -0.51458979
-7.82249784 -3.97222352 -0.34265471
-7.82200050 -3.99899983 -0.14900000
-7.82200050 -3.98600006 -0.44900000
-7.82156372 -3.97127724 -0.32258409
-7.82100010 -4.09399986 0.03600000
-7.82083511 -3.97126102 -0.33500990
-7.82029343 -4.05224657 -0.02742920
-7.82006693 -3.97113943 -0.31665921
-7.82004642 -4.00402403 -0.51400298
-7.81999969 -4.20100021 0.14500000
-7.81999969 -3.99499989 -0.16300000
-7.81999969 -3.98499990 -0.44600001
-7.81969357 -3.99684358 -0.15199400
-7.81963682 -3.97089672 -0.32637960
-7.81939363 -4.04458427 -0.04038370
-7.81935263 -4.05018330 -0.03100140
-7.81929016 -3.97103500 -0.32942441
-7.81926346 -4.04713631 -0.03600120
-7.81855249 -3.97078180 -0.32185081
-7.81799936 -4.02799988 -0.07300000
-7.81786156 -3.97051954 -0.33342189
-7.81773758 -3.99559879 -0.15626110
-7.81768656 -3.97132063 -0.34122211
-7.81711769 -4.02629137 -0.07522130
-7.81700373 -3.99424171 -0.16188420
-7.81700087 -4.05200052 -0.02500000
-7.81699944 -4.04588366 -0.03734090
-7.81599998 -4.20200014 0.14700000
-7.81558990 -3.97079110 -0.33798230
-7.81530714 -3.97015643 -0.33501321
-7.81521273 -4.19852448 0.14355490
-7.81499958 -3.97000003 -0.31500000
-7.81495667 -3.96997857 -0.33199820
-7.81474638 -3.96987128 -0.32598951
-7.81465673 -3.99417090 -0.15855069
-7.81453323 -3.97027040 -0.32902241
-7.81447172 -3.97021651 -0.31929350
-7.81421280 -4.20016956 0.14523670
-7.81416035 -4.09191847 0.03515790
-7.81400061 -4.09399986 0.03900000
-7.81400061 -3.99099994 -0.16800000
-7.81343985 -4.04868746 -0.03047020
-7.81320572 -4.04287720 -0.04066730
-7.81304407 -4.04702282 -0.03300020
-7.81278419 -4.04953051 -0.02810630
-7.81222248 -4.04011488 -0.04400130
-7.81199980 -4.08999968 0.03300000
-7.81099939 -4.19600010 0.14200000
-7.81094790 -3.98997355 -0.17099890
-7.80999994 -4.09499979 0.04100000
-7.80999994 -4.04199982 -0.60900003
-7.80988216 -4.04041529 -0.04284660
-7.80935955 -4.04682732 -0.03168830
-7.80900002 -4.00699997 -0.11400000
-7.80900002 -3.99200010 -0.16000000
-7.80840588 -3.98820686 -0.17300899
-7.80828762 -3.98953176 -0.16928020
-7.80800009 -4.19799995 0.14399999
-7.80762339 -4.03883314 -0.04453320
-7.80736065 -4.04318714 -0.03600170
-7.80726480 -4.04113674 -0.04100140
-7.80686331 -4.09516573 0.04238790
-7.80639648 -4.03720522 -0.04700240
-7.80600023 -4.08999968 0.03500000
-7.80588150 -4.09362936 0.04041450
-7.80573654 -3.98686481 -0.17599399
-7.80532217 -4.00714445 -0.11229600
-7.80508757 -4.04604578 -0.03100030
-7.80478811 -4.04034472 -0.60829502
-7.80400276 -4.09444046 0.04228650
-7.80390978 -3.98888946 -0.16670030
-7.80379200 -3.98721695 -0.17285940
-7.80299997 -4.06599998 0.00400000
-7.80272436 -3.98585939 -0.17899370
-7.80267954 -4.04352951 -0.03441440
-7.80256557 -4.03741693 -0.04513400
-7.80217409 -4.06805468 0.00582220
-7.80200052 -4.09100008 0.03800000
-7.80200052 -4.04099989 -0.61100000
-7.80200052 -4.03800011 -0.60500002
-7.80117226 -4.04108858 -0.03900090
-7.80113459 -4.03407001 -0.05000090
-7.80100012 -4.00699997 -0.11100000
-7.80093527 -3.98568058 -0.17684680
-7.80086803 -3.98793221 -0.16799711
-7.80057001 -4.03962564 -0.60896683
-7.80000019 -3.98400021 -0.18099999
-7.79985332 -4.03546333 -0.04752700
-7.79926205 -4.04313564 -0.03400110
-7.79920387 -4.06570625 0.00397290
-7.79899979 -4.06799984 0.00600000
-7.79851151 -3.98674989 -0.17098930
-7.79709435 -3.98448014 -0.17806970
-7.79699993 -4.09200001 0.04100000
-7.79630709 -3.98321319 -0.47085160
-7.79600000 -4.03499985 -0.04700000
-7.79599714 -3.98499799 -0.17399991
-7.79577875 -4.03788519 -0.04199880
-7.79560328 -4.03179455 -0.05199740
-7.79517746 -4.04010248 -0.03657340
-7.79500008 -4.08699989 0.03600000
-7.79500008 -4.08099937 0.02800000
-7.79400015 -4.03700018 -0.60699999
-7.79391050 -4.03368139 -0.04854060
-7.79380608 -3.98216152 -0.46943751
-7.79364920 -4.03830528 -0.03986270
-7.79287148 -3.98393393 -0.17599709
-7.79227877 -4.08706903 0.03662740
-7.79174471 -3.97987008 -0.18899380
-7.79026175 -4.03213501 -0.05000170
-7.79025650 -4.03710699 -0.04018420
-7.79017687 -4.03509140 -0.04400100
-7.79013109 -4.02906704 -0.05500090
-7.78999996 -4.08799982 0.03800000
-7.78999996 -4.08199978 0.03000000
-7.78999996 -3.98200011 -0.17900001
-7.78997278 -4.08467102 0.03437660
-7.78834581 -4.08021593 0.02839030
-7.78830957 -3.97815800 -0.19200760
-7.78791475 -3.97997999 -0.18680210
-7.78791332 -4.03695488 -0.03899960
-7.78775597 -4.02899790 -0.05365480
-7.78700018 -4.08300018 0.03300000
-7.78700018 -4.07700014 0.02500000
-7.78543806 -3.97622395 -0.19501100
-7.78484726 -4.02856255 -0.05282530
-7.78473759 -4.02586412 -0.05799800
-7.78465080 -4.03181934 -0.04699790
-7.78399992 -3.97900033 -0.18400000
-7.78332472 -3.97741199 -0.19015171
-7.78299999 -4.07800007 0.02700000
-7.78299999 -3.96300006 -0.27599999
-7.78266859 -3.97534108 -0.19701689
-7.78221989 -3.96311188 -0.27900791
-7.78200006 -4.03399992 -0.04200000
-7.78155661 -3.96277428 -0.28198391
-7.78118181 -3.97598886 -0.19279981
-7.78112888 -4.02793884 -0.59721929
-7.78100014 -4.11100006 0.07000000
-7.78100014 -4.08300018 0.03500000
-7.78100014 -3.96199989 -0.28500000
-7.78095198 -3.97797489 -0.18699880
-7.78073931 -3.97386622 -0.19999330
-7.78004551 -4.02957630 -0.04915750
-7.78003073 -4.02397251 -0.05941640
-7.78000021 -4.07299995 0.02200000
-7.78000021 -4.02899981 -0.60100001
-7.77981997 -4.02690697 -0.59498632
-7.77979279 -4.02503300 -0.05712530
-7.77899981 -4.07900000 0.03000000
-7.77880239 -3.97314048 -0.20147140
-7.77874279 -4.03064632 -0.04648770
-7.77870178 -4.02758360 -0.59793252
-7.77844238 -4.03221083 -0.04379890
-7.77839375 -3.97620082 -0.19000959
-7.77808571 -3.96166420 -0.28387621
-7.77740574 -4.10990095 0.06960260
-7.77658701 -4.02929401 -0.04787540
-7.77653503 -4.02551556 -0.59429622
-7.77609396 -3.96173620 -0.27657279
-7.77599907 -4.03099918 -0.04500000
-7.77599382 -3.97199678 -0.20599981
-7.77583122 -3.97491312 -0.19199580
-7.77571011 -4.07130098 0.02056710
-7.77557659 -4.10799694 0.06820090
-7.77544260 -4.02239752 -0.06000830
-7.77500010 -4.07399988 0.02500000
-7.77500010 -4.00199986 -0.10300000
-7.77500010 -4.02400017 -0.59200001
-7.77450037 -3.97322655 -0.19724840
-7.77412844 -4.07741451 0.02966150
-7.77400017 -3.98299980 -0.49200001
-7.77386856 -4.02293158 -0.05799900
-7.77366734 -3.96125293 -0.28045261
-7.77344799 -3.97122884 -0.20801200
-7.77334929 -4.02018070 -0.06400290
-7.77304125 -3.97402143 -0.19500101
-7.77299976 -4.07900000 0.03300000
-7.77299976 -4.07000017 0.01900000
-7.77279329 -4.02589226 -0.59798408
-7.77212524 -4.02606487 -0.05300090
-7.77199984 -4.10599995 0.06700000
-7.77199984 -3.96100020 -0.27599999
-7.77175331 -4.02401972 -0.59443009
-7.77146864 -3.96072912 -0.28198069
-7.77141953 -4.07141399 0.02274580
-7.77135277 -3.97018027 -0.21100961
-7.77099991 -4.07499981 0.02700000
-7.77099991 -3.95999980 -0.28500000
-7.77099657 -3.99999833 -0.10600000
-7.77095270 -3.97197580 -0.19799881
-7.77081394 -4.02781773 -0.04782530
-7.77074146 -4.00101948 -0.10348540
-7.77060843 -3.97125626 -0.20198759
-7.77000046 -3.98099971 -0.48899999
-7.76999998 -4.10900021 0.07000000
-7.76998043 -4.02615833 -0.05116230
-7.76972914 -3.96886134 -0.21399251
-7.76953506 -3.97042418 -0.20598011
-7.76900053 -3.98699999 -0.50900000
-7.76842546 -4.07578087 0.02965400
-7.76840210 -4.02020741 -0.06000310
-7.76840019 -3.96954918 -0.20867801
-7.76831627 -3.97116184 -0.20000820
-7.76805878 -4.01922989 -0.06294990
-7.76804686 -4.01702499 -0.06600040
-7.76803112 -3.98153400 -0.49110341
-7.76792002 -3.96795893 -0.21599780
-7.76700449 -3.99800158 -0.10800010
-7.76700020 -4.06899977 0.02100000
-7.76635885 -4.02218628 -0.05500250
-7.76628351 -4.02432442 -0.05267810
-7.76617670 -3.97009039 -0.20300460
-7.76606989 -3.96863937 -0.21005809
-7.76600266 -3.96700168 -0.21900010
-7.76599979 -3.97900033 -0.48600000
-7.76599979 -4.02199984 -0.59399998
-7.76564980 -3.98482060 -0.50597721
-7.76499987 -4.07499981 0.03000000
-7.76499987 -4.06599998 0.01700000
-7.76454973 -4.01576614 -0.06683140
-7.76425743 -3.96913195 -0.20600680
-7.76408720 -4.02504492 -0.05000060
-7.76399994 -4.00000000 -0.10300000
-7.76399994 -3.96599984 -0.22200000
-7.76393318 -3.97941756 -0.48776519
-7.76300144 -3.99600101 -0.11100000
-7.76300001 -4.07000017 0.02500000
-7.76300001 -3.98099971 -0.49200001
-7.76299810 -4.01799917 -0.06300000
-7.76295948 -4.01397896 -0.06899960
-7.76293278 -3.96727395 -0.21327090
-7.76265574 -3.96782398 -0.20799080
-7.76197958 -3.96653581 -0.21629320
-7.76191282 -3.98295522 -0.50299442
-7.76080370 -3.97812295 -0.48632470
-7.76066780 -4.01623440 -0.06497530
-7.76066589 -4.01934481 -0.05800500
-7.76065111 -3.96682143 -0.21099050
-7.76051617 -3.99604249 -0.10983730
-7.76000023 -3.96399999 -0.22700000
-7.75999737 -3.99799776 -0.10599990
-7.75935078 -3.97918057 -0.48902211
-7.75934267 -4.07003403 0.02568170
-7.75918150 -4.06369781 0.01632630
-7.75908661 -3.98401308 -0.50600469
-7.75906038 -3.99654651 -0.54507452
-7.75903559 -3.96507049 -0.22013021
-7.75899982 -4.06500006 0.01900000
-7.75899982 -3.99400020 -0.11400000
-7.75885725 -3.99821305 -0.54727912
-7.75860453 -4.02152777 -0.05314040
-7.75839424 -4.06783485 0.02331640
-7.75826216 -3.96613407 -0.21400720
-7.75825644 -3.96313143 -0.23000760
-7.75809050 -4.01504707 -0.06600080
-7.75796700 -4.06098270 0.01399990
-7.75743818 -4.01222706 -0.07100400
-7.75715542 -3.98184037 -0.50200868
-7.75683260 -3.96191430 -0.23199500
-7.75651121 -4.01379967 -0.06803030
-7.75607872 -3.96503973 -0.21700220
-7.75600433 -3.99600244 -0.10800010
-7.75600004 -3.97699976 -0.48600000
-7.75558472 -3.96266723 -0.22859670
-7.75548697 -4.06625462 0.02200140
-7.75526142 -4.01713514 -0.06100210
-7.75508881 -3.96104527 -0.23500270
-7.75500059 -3.98299980 -0.50500000
-7.75500011 -3.99799967 -0.54799998
-7.75488281 -3.99395680 -0.11233830
-7.75400019 -3.96399999 -0.21900000
-7.75391197 -4.01124287 -0.07116940
-7.75346422 -3.95972610 -0.23798360
-7.75343037 -4.01804829 -0.05694950
-7.75319004 -4.05894852 0.01261610
-7.75299978 -3.99400020 -0.54200000
-7.75291586 -4.00895691 -0.07399920
-7.75200176 -3.99400115 -0.11100000
-7.75139523 -4.06120682 0.01600080
-7.75138092 -3.98020124 -0.50023657
-7.75131750 -3.95916271 -0.24000980
-7.75099993 -4.01100016 -0.58200002
-7.75062609 -3.99580693 -0.54497367
-7.75044441 -4.05723333 0.01100060
-7.75032139 -3.96123719 -0.22919080
-7.75029564 -4.01463556 -0.06299430
-7.75025511 -4.06460190 0.02090750
-7.75017500 -4.06709146 0.02400050
-7.75012112 -3.96016574 -0.23387730
-7.75000000 -3.96199989 -0.22499999
-7.74957895 -3.95829511 -0.24301811
-7.74832678 -4.00947523 -0.07180190
-7.74813700 -4.01607037 -0.05800100
-7.74801064 -3.96100521 -0.22700030
-7.74800014 -3.99200010 -0.11400000
-7.74800014 -4.00400019 -0.56800002
-7.74786472 -4.06539106 0.02245330
-7.74786377 -4.06292820 0.01899970
-7.74786282 -3.95792961 -0.24599560
-7.74774361 -4.00994968 -0.58054912
-7.74768686 -4.00683784 -0.07699690
-7.74700022 -3.97900033 -0.49900001
-7.74698305 -3.95971775 -0.23254970
-7.74697542 -4.00775242 -0.07448220
-7.74679708 -4.05685425 0.01172750
-7.74659491 -3.95679331 -0.24898700
-7.74628448 -4.01425266 -0.06192050
-7.74600029 -3.96000051 -0.23000000
-7.74558115 -3.95778108 -0.24082869
-7.74517536 -4.01209164 -0.06600150
-7.74511623 -4.05547857 0.01003500
-7.74505424 -3.95602822 -0.25100169
-7.74483395 -3.95801020 -0.23792531
-7.74422503 -4.05711842 0.01300040
-7.74409771 -3.95687819 -0.24347471
-7.74399996 -4.01100016 -0.58399999
-7.74399233 -3.95899630 -0.23299980
-7.74364662 -4.06123734 0.01853330
-7.74357605 -3.95529389 -0.25401890
-7.74334860 -4.00959349 -0.58134007
-7.74311113 -4.00797606 -0.57806653
-7.74300003 -4.00099993 -0.56500000
-7.74299669 -4.05399847 0.00800000
-7.74286366 -4.01392937 -0.06099890
-7.74274015 -4.00386572 -0.07899730
-7.74252415 -4.06327486 0.02100140
-7.74230909 -4.00716019 -0.07400300
-7.74216604 -3.95508480 -0.25700551
-7.74200869 -3.95800400 -0.23500030
-7.74185753 -4.01185513 -0.06435140
-7.74166107 -4.00226307 -0.56677997
-7.74160099 -4.01018000 -0.06761930
-7.74107027 -4.00651884 -0.57593077
-7.74097729 -4.06098413 0.01936300
-7.74060631 -4.05879354 0.01599920
-7.74012899 -3.95438361 -0.25258839
-7.74011850 -4.00060844 -0.56490809
-7.74008846 -3.95704532 -0.23800270
-7.74004173 -3.95402122 -0.26200140
-7.74000263 -4.00572872 -0.07545150
-7.73952579 -3.95512533 -0.24865620
-7.73944139 -4.00798750 -0.57971042
-7.73899174 -3.95299530 -0.26499969
-7.73885393 -3.95416331 -0.25659120
-7.73837423 -4.01008272 -0.06554680
-7.73834419 -3.95617628 -0.24101070
-7.73779249 -3.95189404 -0.26699281
-7.73763084 -3.95485854 -0.24450570
-7.73740053 -4.00120735 -0.08200420
-7.73727751 -4.05309677 0.00941690
-7.73724890 -4.05861282 0.01768550
-7.73723745 -4.00509167 -0.57492608
-7.73722172 -4.00411463 -0.07700220
-7.73699999 -3.96100020 -0.20800000
-7.73649263 -4.00833750 -0.06796410
-7.73623466 -3.95286322 -0.26016521
-7.73621511 -4.05166578 0.00759180
-7.73617935 -4.05009365 0.00500010
-7.73600006 -3.98499990 -0.12200000
-7.73595428 -3.95197606 -0.26999840
-7.73573828 -3.95386624 -0.24599171
-7.73536396 -4.00367117 -0.57295293
-7.73495674 -3.95224476 -0.26343879
-7.73486662 -4.00693130 -0.07099880
-7.73464727 -3.95133066 -0.27302289
-7.73393774 -4.05642605 0.01528080
-7.73367882 -3.95383549 -0.24898970
-7.73315763 -4.00556374 -0.57793713
-7.73315144 -3.98430681 -0.12241280
-7.73299980 -4.05499983 0.01300000
-7.73278475 -4.00788784 -0.06599820
-7.73249006 -4.04907370 0.00518730
-7.73235655 -3.99977756 -0.08311110
-7.73218870 -3.95076871 -0.26807159
-7.73218727 -4.00334263 -0.57432753
-7.73199987 -3.98000002 -0.13300000
-7.73199987 -3.99899983 -0.56400001
-7.73193264 -4.00097942 -0.08054930
-7.73167181 -3.95121145 -0.26393539
-7.73115110 -3.95224929 -0.25332531
-7.73020363 -3.95013952 -0.26963761
-7.73009968 -3.95129704 -0.26127189
-7.73000050 -4.05000019 0.00800000
-7.72995520 -4.00397682 -0.07399960
-7.72973824 -3.95969820 -0.20791321
-7.72963715 -4.00032997 -0.56904691
-7.72912502 -4.04706478 0.00300000
-7.72908211 -3.95104194 -0.25700271
-7.72900009 -3.97799993 -0.13500001
-7.72800016 -4.05499983 0.01600000
-7.72800016 -4.01200008 -0.05600000
-7.72800016 -3.95999980 -0.20500000
-7.72775030 -3.99638820 -0.08800850
-7.72748756 -4.00397015 -0.07243460
-7.72739792 -4.00520563 -0.06900360
-7.72715378 -3.99844027 -0.08383150
-7.72685862 -4.00192642 -0.57498950
-7.72649717 -4.00000811 -0.57031941
-7.72635221 -3.95018053 -0.26201189
-7.72600031 -3.94600010 -0.30800000
-7.72599983 -3.94600010 -0.30500001
-7.72599983 -3.94600010 -0.31099999
-7.72547865 -3.94924450 -0.26501641
-7.72513103 -4.00106764 -0.07700130
-7.72499990 -4.05100012 0.01100000
-7.72499990 -3.98299980 -0.12200000
-7.72499990 -3.94600010 -0.31600001
-7.72499990 -3.94600010 -0.31900001
-7.72499990 -3.94600010 -0.32400000
-7.72499990 -3.94600010 -0.32699999
-7.72499990 -3.94600010 -0.34299999
-7.72483873 -3.94837379 -0.27134311
-7.72442818 -3.99713683 -0.08556080
-7.72432613 -3.99869919 -0.56861800
-7.72394562 -4.00170612 -0.07484750
-7.72388554 -3.99745870 -0.56606489
-7.72350311 -4.04391670 0.00097480
-7.72335482 -4.04568720 0.00367250
-7.72320461 -3.99458838 -0.08999070
-7.72300529 -3.97812057 -0.13273101
-7.72300005 -4.00899982 -0.05800000
-7.72236729 -3.94539261 -0.32497790
-7.72186708 -4.00293064 -0.07099880
-7.72186136 -3.99692822 -0.08499850
-7.72162676 -3.94490695 -0.30879259
-7.72100019 -3.98099971 -0.12500000
-7.72100019 -3.96199989 -0.18400000
-7.72061062 -4.04888582 0.00966800
-7.72039795 -3.99658918 -0.56616378
-7.72039604 -3.99872279 -0.57110322
-7.72036028 -3.99818611 -0.07900370
-7.71999979 -4.05100012 0.01300000
-7.71991968 -3.99300909 -0.09125920
-7.71971464 -4.00994492 -0.05615380
-7.71932173 -3.99960661 -0.07653100
-7.71873522 -3.99486351 -0.56298077
-7.71824884 -4.04900312 0.01074590
-7.71805286 -3.99568295 -0.56543881
-7.71804667 -4.04702425 0.00800000
-7.71799803 -3.94401002 -0.34388399
-7.71787167 -3.96093392 -0.18599690
-7.71750355 -3.94407439 -0.30702731
-7.71745682 -3.94423914 -0.32373941
-7.71720886 -3.94405150 -0.34106120
-7.71700382 -3.99400210 -0.08700000
-7.71700001 -4.01000023 -0.05500000
-7.71697092 -3.94399285 -0.31604570
-7.71685314 -4.04039049 -0.00112580
-7.71669197 -3.99984097 -0.07399710
-7.71622562 -3.99673271 -0.07975270
-7.71617079 -4.04308987 0.00200000
-7.71547556 -3.99572873 -0.08199440
-7.71508646 -3.95904422 -0.18900210
-7.71500015 -3.94400024 -0.30300000
-7.71454287 -4.04131317 0.00085740
-7.71453571 -3.98927689 -0.09500660
-7.71434307 -3.99329138 -0.56265730
-7.71431398 -3.99616313 -0.56902319
-7.71404839 -3.99202538 -0.56000352
-7.71400023 -3.94300008 -0.30800000
-7.71400023 -3.94300008 -0.34299999
-7.71331167 -4.04716396 0.01000040
-7.71299982 -3.94300008 -0.31299999
-7.71299982 -3.94300008 -0.31600001
-7.71299982 -3.94300008 -0.32100001
-7.71278429 -3.99396420 -0.56529868
-7.71226978 -3.99113917 -0.09000320
-7.71209288 -3.95804787 -0.19100229
-7.71199989 -3.94300008 -0.32400000
-7.71130562 -3.99715877 -0.07700310
-7.71118307 -4.04309654 0.00500010
-7.71099997 -4.08999968 0.06600000
-7.71034813 -3.98805690 -0.09590150
-7.71000004 -3.95999980 -0.18400000
-7.70984125 -3.95643210 -0.19402120
-7.70983028 -4.03891134 0.00000000
-7.70944452 -3.99271250 -0.56495929
-7.70923805 -4.03709078 -0.00348780
-7.70902824 -3.95797849 -0.18863469
-7.70900011 -4.09200001 0.06900000
-7.70900011 -3.99000001 -0.55699998
-7.70859051 -3.99534678 -0.07830790
-7.70800018 -3.95500016 -0.19700000
-7.70752192 -3.95875478 -0.18598850
-7.70739317 -3.98920345 -0.09300470
-7.70733929 -3.99358630 -0.08243530
-7.70726299 -3.99016690 -0.55932420
-7.70625305 -4.04360819 0.00799920
-7.70622683 -3.99411798 -0.07900230
-7.70618773 -3.95769310 -0.18791150
-7.70608473 -4.09024000 0.06786260
-7.70591211 -3.98495412 -0.10099880
-7.70582342 -3.99206161 -0.08614300
-7.70490217 -3.95577550 -0.19300370
-7.70452833 -3.98569369 -0.09871170
-7.70418119 -3.99009371 -0.56201321
-7.70400000 -4.03999996 0.00200000
-7.70309162 -3.98704743 -0.09500110
-7.70290899 -4.03595257 -0.00300000
-7.70269060 -3.99094486 -0.08617510
-7.70230389 -4.03289509 -0.00694080
-7.70200014 -4.08500004 0.06300000
-7.70199156 -3.95599580 -0.19199979
-7.70182705 -3.98854852 -0.56027758
-7.70160103 -3.98279357 -0.10399460
-7.70108223 -4.04007101 0.00391820
-7.70100021 -3.96700025 -0.50500000
-7.70100021 -3.98600006 -0.55400002
-7.70099831 -3.99199915 -0.08200000
-7.70013952 -3.98807240 -0.09000160
-7.69999981 -4.08699989 0.06600000
-7.69949389 -3.95425367 -0.19401249
-7.69922304 -3.98336482 -0.10166070
-7.69899988 -3.98699999 -0.55900002
-7.69886732 -3.98493147 -0.09799830
-7.69813490 -3.98921967 -0.08680320
-7.69788122 -3.96545362 -0.50205737
-7.69722366 -3.96608901 -0.50450289
-7.69700003 -3.95300007 -0.19700000
-7.69673395 -3.98086190 -0.10599630
-7.69663954 -3.98336530 -0.10053300
-7.69626570 -4.03213930 -0.00600020
-7.69603252 -3.98670363 -0.09137810
-7.69500017 -3.96399999 -0.49900001
-7.69500017 -3.97000003 -0.51899999
-7.69500017 -3.97300029 -0.52800000
-7.69490910 -4.02895164 -0.01099990
-7.69460869 -4.03041792 -0.00755900
-7.69390106 -3.98246670 -0.55006450
-7.69380856 -3.98390555 -0.55419850
-7.69297409 -3.98485923 -0.09414580
-7.69208574 -3.97804427 -0.10900120
-7.69201279 -3.98015642 -0.10436570
-7.69199991 -3.96799994 -0.51599997
-7.69199991 -3.98400021 -0.55599999
-7.69173479 -3.98686194 -0.08799700
-7.69099998 -3.96499968 -0.50500000
-7.69099998 -3.97099972 -0.52499998
-7.69095230 -3.98253751 -0.55288661
-7.69048357 -3.98325038 -0.09600600
-7.69000006 -4.03200006 -0.00300000
-7.68934107 -4.02865410 -0.00799930
-7.68920040 -4.02691317 -0.01150800
-7.68862820 -3.98032975 -0.54992563
-7.68817854 -4.02509308 -0.01400030
-7.68781376 -3.98430228 -0.09194540
-7.68753052 -3.96327400 -0.50203472
-7.68699980 -3.98400021 -0.56099999
-7.68613529 -3.98107004 -0.09800170
-7.68610477 -3.97672510 -0.10854560
-7.68591309 -3.98095465 -0.55299371
-7.68526030 -3.97813463 -0.10600360
-7.68506098 -3.97974491 -0.55074328
-7.68499994 -4.03200006 0.00000000
-7.68499994 -3.96799994 -0.51899999
-7.68424606 -4.02468395 -0.01270330
-7.68424129 -3.97771788 -0.54665178
-7.68400002 -3.96199989 -0.49900001
-7.68400002 -3.97099972 -0.52800000
-7.68326616 -3.97313809 -0.11400400
-7.68323803 -3.98177791 -0.09517130
-7.68316603 -4.02908659 -0.00600010
-7.68300009 -4.07499981 0.05800000
-7.68300009 -3.98200011 -0.55800003
-7.68285751 -3.98010850 -0.09850760
-7.68252707 -3.97627282 -0.54403740
-7.68217564 -4.02509117 -0.01100030
-7.68200016 -3.94199967 -0.22900000
-7.68193626 -3.96993899 -0.52638370
-7.68186522 -3.97893047 -0.10099820
-7.68125916 -4.02213526 -0.01600050
-7.68122101 -3.97511387 -0.10900310
-7.68100023 -3.96599984 -0.51599997
-7.68053627 -4.02347517 -0.01282760
-7.68021250 -3.97742581 -0.54781717
-7.68013811 -3.97291136 -0.11292530
-7.68013763 -3.97858953 -0.55008137
-7.67999983 -4.07600021 0.06000000
-7.67999983 -3.94099998 -0.23100001
-7.67999983 -3.96900010 -0.52499998
-7.67948341 -3.97124982 -0.11700740
-7.67864656 -4.02689838 -0.00678850
-7.67834902 -4.02918291 -0.00300010
-7.67821932 -3.97527599 -0.54458278
-7.67799997 -3.94000030 -0.23700000
-7.67799997 -3.97399998 -0.54100001
-7.67788792 -4.07416773 0.05814680
-7.67760468 -3.97679543 -0.10299470
-7.67734718 -3.98018026 -0.09600430
-7.67704964 -3.97302580 -0.11100070
-7.67700005 -4.02500010 -0.00800000
-7.67700005 -3.96399999 -0.13800000
-7.67700005 -3.98200011 -0.56099999
-7.67631960 -4.01970243 -0.01745230
-7.67618704 -3.93909597 -0.23900580
-7.67597294 -3.97550368 -0.54706931
-7.67586851 -3.96993208 -0.11899800
-7.67531204 -4.02116346 -0.01400060
-7.67525816 -3.94765949 -0.19196790
-7.67500019 -4.07000017 0.05500000
-7.67487526 -3.97888708 -0.09721720
-7.67447329 -3.93772960 -0.24198340
-7.67412615 -4.02008915 -0.01612360
-7.67339897 -3.97420669 -0.10600550
-7.67300034 -3.97099972 -0.11400000
-7.67260456 -3.96779561 -0.12199370
-7.67216492 -3.93708467 -0.24500529
-7.67202902 -4.01791334 -0.01827990
-7.67199993 -4.02600002 -0.00600000
-7.67199993 -3.97399998 -0.54400003
-7.67199993 -3.98000002 -0.55800003
-7.67159462 -3.97610140 -0.10051010
-7.67153645 -3.97447395 -0.10413110
-7.67149019 -3.93757033 -0.24095771
-7.67146683 -3.96992278 -0.11596600
-7.67100000 -4.07200003 0.05700000
-7.67100000 -3.94000030 -0.22900000
-7.67000008 -4.02199984 -0.01100000
-7.67000008 -3.93600011 -0.24699999
-7.66937733 -3.97264862 -0.10753750
-7.66913462 -3.97506928 -0.10100180
-7.66904545 -4.01502371 -0.02200010
-7.66902018 -3.96648932 -0.12339210
-7.66899633 -3.96899819 -0.11699990
-7.66825724 -4.01813555 -0.01700060
-7.66820192 -3.97342730 -0.10427100
-7.66799736 -3.93730688 -0.23993950
-7.66715622 -3.94606304 -0.19255079
-7.66699982 -3.93800020 -0.23700000
-7.66636419 -4.01516533 -0.01956870
-7.66599989 -4.06599998 0.05200000
-7.66599989 -3.93400025 -0.25500000
-7.66551256 -3.93569517 -0.24398270
-7.66527462 -3.93714094 -0.23900861
-7.66517925 -3.97009301 -0.11100260
-7.66504908 -3.97302580 -0.10300070
-7.66500521 -3.96400213 -0.12700009
-7.66500473 -3.96700239 -0.11900010
-7.66499996 -4.02199984 -0.00800000
-7.66499996 -3.94600010 -0.19100000
-7.66499996 -3.93299985 -0.25799999
-7.66472244 -3.97137094 -0.10776710
-7.66429567 -4.02091122 -0.01024300
-7.66400909 -4.01800489 -0.01400000
-7.66364908 -3.93582010 -0.24198890
-7.66359091 -4.01278448 -0.02296470
-7.66300011 -4.06699991 0.05500000
-7.66204500 -3.93280721 -0.25673789
-7.66189432 -3.96461082 -0.12384020
-7.66156244 -3.96777368 -0.11399350
-7.66154957 -3.93476844 -0.24498560
-7.66108799 -3.96204519 -0.13000150
-7.66100025 -3.97099972 -0.10600000
-7.66055870 -4.06469202 0.05229090
-7.66047668 -4.06277561 0.05017110
-7.65999985 -4.04699993 0.03000000
-7.65899992 -3.93400025 -0.24699999
-7.65885639 -3.96824431 -0.11152160
-7.65834522 -4.01572990 -0.01630670
-7.65821218 -4.01911068 -0.01100030
-7.65799999 -4.06099987 0.04900000
-7.65769720 -3.96080184 -0.13104931
-7.65767813 -4.01735306 -0.01292210
-7.65743446 -3.96622491 -0.11700660
-7.65727091 -4.00914145 -0.02700100
-7.65715218 -4.04831648 0.03221710
-7.65708351 -3.96304345 -0.12500140
-7.65699673 -3.96899819 -0.10900000
-7.65649748 -3.96709180 -0.11282550
-7.65611649 -3.96118951 -0.12874590
-7.65604639 -4.01102400 -0.02200010
-7.65600014 -4.00500011 -0.03200000
-7.65600014 -3.93200016 -0.25500000
-7.65508604 -4.00936699 -0.02507090
-7.65500021 -4.06300020 0.05200000
-7.65399981 -3.93099999 -0.25799999
-7.65387487 -3.95793557 -0.13499780
-7.65382910 -3.96391201 -0.11899740
-7.65326738 -3.96113849 -0.12700440
-7.65316916 -4.01326275 -0.01783570
-7.65300417 -3.96700239 -0.11100010
-7.65234661 -3.95902491 -0.13208631
-7.65213728 -4.01507235 -0.01400030
-7.65209913 -4.00657511 -0.03000430
-7.65039921 -3.95620656 -0.13800719
-7.65034962 -4.00218248 -0.03500160
-7.65000010 -4.00799942 -0.02500000
-7.64991236 -3.96195459 -0.12199860
-7.64973736 -3.95886421 -0.12999550
-7.64930296 -3.96421123 -0.11670270
-7.64925909 -4.00608253 -0.02878450
-7.64906549 -3.95656466 -0.13584571
-7.64900064 -3.96499968 -0.11400000
-7.64900017 -4.05700064 0.04700000
-7.64799833 -4.01297522 -0.01598650
-7.64741468 -4.00443935 -0.03195490
-7.64685965 -3.95492744 -0.14099739
-7.64672136 -3.96104050 -0.12251850
-7.64612913 -3.95706677 -0.13300221
-7.64605713 -4.00186253 -0.03470810
-7.64599991 -4.05900002 0.04900000
-7.64599609 -3.95999765 -0.12499990
-7.64573812 -4.01186275 -0.01699940
-7.64526510 -3.95486498 -0.13902220
-7.64503765 -4.00901937 -0.02200010
-7.64499664 -3.96299839 -0.11699990
-7.64431858 -4.01012564 -0.01914500
-7.64422560 -3.96156025 -0.11948520
-7.64408827 -4.00504637 -0.02700030
-7.64360952 -3.95279837 -0.14299271
-7.64266491 -3.95534468 -0.13501181
-7.64208031 -4.00036049 -0.03588640
-7.64200449 -3.95800209 -0.12700009
-7.64160824 -4.05615473 0.04724140
-7.64100456 -3.96100259 -0.11900010
-7.64087820 -4.05246592 0.04400510
-7.64000034 -3.95099998 -0.14600000
-7.63965750 -4.00736094 -0.02183440
-7.63933563 -3.95365620 -0.13798800
-7.63922358 -4.00511742 -0.02500070
-7.63912725 -4.00136137 -0.03252400
-7.63912535 -4.00906563 -0.01900030
-7.63874197 -3.95873380 -0.12385940
-7.63826180 -4.00213718 -0.03000100
-7.63818455 -4.05409813 0.04600110
-7.63813305 -3.95606923 -0.13000230
-7.63785648 -3.95212412 -0.14086761
-7.63700056 -3.95900011 -0.12200000
-7.63677549 -4.00603533 -0.02240400
-7.63642693 -3.99783349 -0.03791840
-7.63639116 -3.94920206 -0.14900760
-7.63583469 -4.05192232 0.04413920
-7.63546848 -3.99937558 -0.03416970
-7.63448238 -3.95424986 -0.13300841
-7.63331175 -4.00516367 -0.02200090
-7.63322735 -3.94711781 -0.15100449
-7.63317108 -3.99719310 -0.03728480
-7.63304710 -4.00202417 -0.02700020
-7.63300467 -3.95004869 -0.14377131
-7.63299990 -4.04800034 0.04100000
-7.63299608 -3.95699811 -0.12499990
-7.63273764 -3.99886250 -0.03299890
-7.63185072 -3.95386100 -0.13228260
-7.63086939 -3.95293212 -0.13499770
-7.63016987 -3.99527979 -0.03967480
-7.63000011 -4.05000019 0.04300000
-7.62990570 -3.94595146 -0.15399811
-7.62962723 -4.06805468 0.06650390
-7.62947559 -3.95451379 -0.12870871
-7.62917757 -3.94632721 -0.15102310
-7.62913132 -3.94806790 -0.14600250
-7.62815475 -3.99408150 -0.04100080
-7.62772608 -3.99547625 -0.03707530
-7.62769270 -3.95084071 -0.13799439
-7.62766886 -3.95260477 -0.13269120
-7.62741566 -3.95170784 -0.13542680
-7.62730646 -4.00216103 -0.02500100
-7.62709665 -3.94405007 -0.15600200
-7.62700033 -3.99899983 -0.03000000
-7.62675428 -4.00003099 -0.02750470
-7.62599993 -4.04400015 0.03800000
-7.62560701 -3.94679642 -0.14799240
-7.62508535 -3.95304370 -0.13000150
-7.62435627 -3.99403453 -0.03803730
-7.62430334 -3.94915748 -0.14100561
-7.62390995 -3.94295311 -0.15899810
-7.62345600 -3.99984789 -0.02640260
-7.62327051 -3.94294071 -0.15585160
-7.62311792 -3.99245739 -0.04071810
-7.62300014 -4.06400013 0.06400000
-7.62266397 -3.94453859 -0.15233950
-7.62227154 -3.99014211 -0.04300150
-7.62126732 -3.95113873 -0.13200460
-7.62114000 -3.94707227 -0.14300260
-7.62108517 -3.94104409 -0.16200180
-7.62099981 -4.04500008 0.04100000
-7.62099934 -3.99599981 -0.03300000
-7.62099886 -3.94871688 -0.13907810
-7.62088728 -3.99706411 -0.03047000
-7.62073469 -3.99286103 -0.03799870
-7.61969233 -3.94152522 -0.15964830
-7.61947060 -3.94889998 -0.13673081
-7.61943626 -4.04258919 0.03857390
-7.61899996 -4.06599998 0.06600000
-7.61899996 -3.91899991 -0.27599999
-7.61815786 -3.91908121 -0.27900580
-7.61778212 -3.93988752 -0.16399530
-7.61759806 -3.94579220 -0.14599229
-7.61755705 -3.94225359 -0.15397079
-7.61734343 -3.94725251 -0.13989951
-7.61700010 -4.03999996 0.03500000
-7.61700010 -3.92099977 -0.25400001
-7.61644363 -3.98723221 -0.04600270
-7.61635542 -3.95718455 -0.11100520
-7.61611366 -4.04218245 0.03924380
-7.61600018 -3.92000008 -0.25700000
-7.61551952 -3.99574828 -0.02999810
-7.61508703 -3.91839862 -0.27781570
-7.61508560 -3.94034791 -0.15696760
-7.61500120 -3.99300075 -0.03500000
-7.61499929 -3.93200016 -0.19100000
-7.61488295 -3.98946261 -0.04100480
-7.61482477 -3.93790984 -0.16699620
-7.61478996 -3.94520688 -0.14347529
-7.61422300 -3.94411564 -0.14800429
-7.61417055 -3.94708848 -0.13800310
-7.61329985 -3.98745990 -0.04409410
-7.61259317 -3.93910003 -0.16076270
-7.61209345 -3.94434476 -0.14444619
-7.61199999 -4.03999996 0.03800000
-7.61199999 -3.95500016 -0.11400000
-7.61197710 -3.91755939 -0.27921480
-7.61170149 -3.93636346 -0.17001569
-7.61138105 -3.93151450 -0.18986200
-7.61113358 -3.94206882 -0.15100260
-7.61074257 -3.94486642 -0.13999531
-7.61060381 -3.98479223 -0.04799750
-7.61053276 -3.99101949 -0.03674580
-7.61036301 -3.93915272 -0.15896580
-7.61000013 -3.95700002 -0.10900000
-7.60976076 -3.93620920 -0.16824239
-7.60943365 -3.98569798 -0.04541480
-7.60939693 -3.95522308 -0.11228330
-7.60900021 -4.03599977 0.03300000
-7.60900021 -3.97399998 -0.06700000
-7.60900021 -3.91700029 -0.27599999
-7.60899830 -3.98699856 -0.04300000
-7.60895061 -3.99297380 -0.03299980
-7.60883141 -3.93491268 -0.17199621
-7.60856342 -3.94029212 -0.15401140
-7.60799980 -3.91599989 -0.28099999
-7.60792208 -3.91914010 -0.25476769
-7.60753584 -3.94212222 -0.14823011
-7.60735369 -3.93714809 -0.16196489
-7.60704613 -3.94302368 -0.14300090
-7.60697079 -3.95417619 -0.11358420
-7.60631466 -3.93457699 -0.17056639
-7.60607767 -3.93955827 -0.15602210
-7.60607243 -3.99110651 -0.03468580
-7.60600567 -3.95500278 -0.11100010
-7.60600042 -3.93099999 -0.18799999
-7.60586452 -3.93392968 -0.17499690
-7.60555172 -3.94040537 -0.15082070
-7.60500002 -3.98200011 -0.05100000
-7.60500002 -3.91799998 -0.25700000
-7.60438967 -3.93364811 -0.17275830
-7.60437393 -3.93686390 -0.16179711
-7.60405159 -3.93445039 -0.16866609
-7.60400009 -4.03599977 0.03500000
-7.60400009 -3.97499990 -0.06400000
-7.60360670 -3.98379374 -0.04599760
-7.60356998 -3.94129467 -0.14601091
-7.60348082 -3.93224883 -0.17801130
-7.60342932 -3.93897700 -0.15405750
-7.60326052 -3.98713636 -0.04100140
-7.60298204 -3.93995190 -0.15010500
-7.60274649 -3.98939204 -0.03600350
-7.60272837 -4.03328848 0.03170690
-7.60200024 -3.95300007 -0.11400000
-7.60142660 -3.93210912 -0.17598949
-7.60126448 -3.93410110 -0.16696189
-7.60125732 -3.93318748 -0.17025390
-7.60113764 -3.93107104 -0.18000330
-7.60105562 -3.93796301 -0.15734680
-7.60091686 -3.93566060 -0.16321550
-7.60053158 -4.03128195 0.03000210
-7.60031939 -3.93823910 -0.15322261
-7.60026312 -3.94013667 -0.14800510
-7.59999990 -3.97900033 -0.05400000
-7.59892130 -4.03254509 0.03199130
-7.59886312 -3.92992926 -0.18299671
-7.59877586 -3.93025947 -0.18048960
-7.59848166 -3.93269634 -0.16894400
-7.59843159 -3.93721223 -0.15689620
-7.59800005 -3.98099971 -0.04900000
-7.59800005 -3.97199988 -0.06700000
-7.59773731 -3.93786430 -0.15099479
-7.59772873 -3.93121457 -0.17463030
-7.59769440 -3.98384023 -0.04299830
-7.59734201 -3.98521781 -0.04073180
-7.59691858 -4.03096437 0.03088610
-7.59687328 -3.98593307 -0.03799940
-7.59652090 -3.92875171 -0.18498830
-7.59626865 -3.93700743 -0.15424040
-7.59621239 -3.93462825 -0.16402620
-7.59574080 -3.93131280 -0.17192620
-7.59524059 -3.93524218 -0.16031480
-7.59452820 -3.97740769 -0.05400630
-7.59413671 -3.92707062 -0.18800341
-7.59400511 -4.01367474 0.00797270
-7.59399986 -4.01200008 0.00600000
-7.59328032 -3.93266320 -0.16702810
-7.59307241 -3.92833710 -0.18142980
-7.59252596 -3.93327284 -0.16445100
-7.59240103 -3.98193121 -0.04380530
-7.59224844 -3.93497944 -0.15767060
-7.59222841 -3.93000984 -0.17381920
-7.59200001 -4.02700043 0.02700000
-7.59134483 -3.92617846 -0.19100870
-7.59100008 -4.01399994 0.00900000
-7.59093428 -4.02788115 0.02924290
-7.59091282 -3.98295426 -0.04099950
-7.59035826 -3.92863297 -0.17693840
-7.59029675 -3.93115354 -0.16900660
-7.58948517 -3.93335986 -0.16047730
-7.58913326 -3.97307014 -0.05900100
-7.58903456 -3.92521858 -0.19189119
-7.58791971 -3.92692399 -0.17995070
-7.58786440 -3.93094158 -0.16745560
-7.58775473 -3.92536211 -0.18939270
-7.58772993 -3.93177795 -0.16419441
-7.58747768 -3.92611456 -0.18440969
-7.58725071 -3.93013000 -0.17200570
-7.58719110 -3.97477221 -0.05491520
-7.58707094 -3.97895455 -0.04675660
-7.58678579 -3.92288995 -0.19599450
-7.58626890 -3.97714090 -0.04900170
-7.58573008 -3.92770815 -0.17707260
-7.58509827 -3.92601562 -0.18295410
-7.58508968 -3.98004651 -0.04300050
-7.58500004 -4.02299976 0.02500000
-7.58478212 -3.93188739 -0.16099539
-7.58428383 -3.93022871 -0.16601090
-7.58404779 -3.97002506 -0.06200040
-7.58401632 -3.97187328 -0.05856340
-7.58399343 -3.92199636 -0.19899981
-7.58378887 -3.92876935 -0.17279120
-7.58269882 -3.92432642 -0.18496829
-7.58244324 -3.97742629 -0.04697820
-7.58215618 -4.02265978 0.02534050
-7.58177185 -3.92988181 -0.16399500
-7.58173132 -3.92292857 -0.19177440
-7.58168459 -3.92876458 -0.16824360
-7.58162212 -3.92732263 -0.17701450
-7.58115149 -3.92817569 -0.17181860
-7.58113194 -3.92106819 -0.20100351
-7.58102131 -3.96995068 -0.06053550
-7.58069086 -3.97183847 -0.05699770
-7.58066607 -3.97434974 -0.05100450
-7.57996559 -3.92346501 -0.18797439
-7.57973814 -3.92615604 -0.17871360
-7.57939529 -3.97720695 -0.04600240
-7.57904434 -3.91902208 -0.20400120
-7.57889700 -3.92657804 -0.17534681
-7.57887506 -3.92845368 -0.16701929
-7.57860374 -3.96779275 -0.06399670
-7.57798672 -3.92488194 -0.18102250
-7.57797050 -3.97563481 -0.04801480
-7.57778740 -3.92166162 -0.19319980
-7.57775831 -3.92184019 -0.18994381
-7.57765341 -4.01881599 0.02199900
-7.57759857 -3.92008901 -0.19822221
-7.57657862 -3.91829944 -0.20601571
-7.57646370 -3.92375851 -0.18303540
-7.57626009 -3.92665339 -0.16902810
-7.57613468 -3.96778154 -0.06199010
-7.57581568 -3.92458725 -0.17938510
-7.57563066 -3.92050958 -0.19473889
-7.57540321 -3.97299051 -0.05168530
-7.57526350 -3.96913838 -0.05900210
-7.57499981 -3.90799999 -0.26400000
-7.57473755 -3.91686463 -0.20899279
-7.57470179 -3.91826224 -0.20267260
-7.57413578 -3.97407126 -0.04900090
-7.57381916 -3.90790677 -0.26699361
-7.57367563 -3.92286801 -0.18504091
-7.57366991 -4.01935577 0.02400210
-7.57321692 -3.96511340 -0.06700190
-7.57318830 -3.92561579 -0.17202701
-7.57300043 -3.90700030 -0.27000001
-7.57300043 -3.90700030 -0.38499999
-7.57270861 -3.91933179 -0.19596660
-7.57251024 -3.91574669 -0.21198630
-7.57229424 -3.91743517 -0.20322759
-7.57191038 -3.92557621 -0.16963419
-7.57187796 -3.90693736 -0.38199389
-7.57136726 -3.91661477 -0.20675810
-7.57123947 -4.01605129 0.02016960
-7.57115412 -3.92356181 -0.17688520
-7.57100010 -3.94799972 -0.10100000
-7.57091618 -3.96558189 -0.06355020
-7.57071018 -3.91777515 -0.20071270
-7.57065248 -3.92218542 -0.18355790
-7.57064152 -3.96373916 -0.06815760
-7.57038355 -3.92263436 -0.18102330
-7.57020569 -3.96958375 -0.05699400
-7.57000017 -3.90599990 -0.37700000
-7.56987000 -3.91493225 -0.21399631
-7.56977749 -3.92388463 -0.17399490
-7.56917763 -3.92476702 -0.17123801
-7.56912661 -3.92153502 -0.18696210
-7.56906271 -3.92006803 -0.19005179
-7.56890297 -3.97120285 -0.05250960
-7.56828403 -3.91499138 -0.21046980
-7.56820822 -3.94699550 -0.10249060
-7.56804371 -3.96202278 -0.07000040
-7.56761503 -3.91331840 -0.21701761
-7.56759691 -3.91679215 -0.20098931
-7.56709433 -3.91573310 -0.20552430
-7.56699991 -3.97399998 -0.04600000
-7.56677008 -4.01389408 0.01865360
-7.56645441 -3.91927123 -0.19306260
-7.56634569 -3.94618082 -0.10400480
-7.56622648 -4.01529408 0.02090790
-7.56599998 -3.94300008 -0.11100000
-7.56560230 -3.91397810 -0.21237820
-7.56558514 -3.90596509 -0.26819161
-7.56553984 -3.91227937 -0.21901560
-7.56531048 -3.91564322 -0.20298150
-7.56514406 -3.92407465 -0.16900320
-7.56513500 -3.96307087 -0.06500120
-7.56500006 -3.90599990 -0.26499999
-7.56492043 -3.92099690 -0.18136460
-7.56486988 -3.96693158 -0.05899900
-7.56433296 -3.96044421 -0.07057540
-7.56415081 -3.92029905 -0.18419141
-7.56394005 -3.91800523 -0.19605030
-7.56360197 -3.91179371 -0.22198831
-7.56358242 -3.91871309 -0.19026920
-7.56326199 -3.96913767 -0.05400190
-7.56315756 -3.91456294 -0.20597699
-7.56300020 -4.00500011 0.00800000
-7.56300020 -3.90499997 -0.27000001
-7.56300020 -3.90499997 -0.38499999
-7.56264687 -3.94081569 -0.11399470
-7.56209421 -3.92004895 -0.18200231
-7.56209183 -3.94404769 -0.10600130
-7.56204653 -3.92302442 -0.17200109
-7.56199980 -4.01100016 0.01600000
-7.56199980 -3.97099972 -0.04900000
-7.56186962 -3.90493250 -0.38199341
-7.56185961 -3.91092801 -0.22499581
-7.56137705 -3.91671395 -0.19803610
-7.56115389 -3.90407920 -0.37900770
-7.56106997 -3.91246104 -0.21409041
-7.56098413 -3.91347432 -0.20897190
-7.56097269 -3.91780901 -0.19216231
-7.56030560 -3.91074371 -0.22238369
-7.56028652 -3.91890669 -0.18636690
-7.56009626 -3.91004992 -0.22700290
-7.55999994 -3.94600010 -0.10100000
-7.55977869 -3.96088409 -0.06699800
-7.55953789 -3.91067791 -0.21954340
-7.55926180 -3.96413732 -0.06200210
-7.55900002 -4.01200008 0.01900000
-7.55891705 -3.93895721 -0.11599870
-7.55883217 -3.91543102 -0.20102210
-7.55876780 -3.91236281 -0.21096560
-7.55870152 -3.91137600 -0.21543659
-7.55855560 -3.94263577 -0.10771990
-7.55826330 -3.90913582 -0.23000801
-7.55822277 -3.96611619 -0.05700170
-7.55802917 -3.95752215 -0.07340460
-7.55786085 -3.91792798 -0.18799651
-7.55777311 -3.97126985 -0.04732760
-7.55672979 -3.90785980 -0.23299170
-7.55665255 -3.91385603 -0.20304440
-7.55655384 -3.91125131 -0.21395910
-7.55646896 -4.00171852 0.00599960
-7.55599642 -3.94399834 -0.10399990
-7.55577278 -3.95741224 -0.07158730
-7.55567217 -3.90826130 -0.23030201
-7.55551863 -3.91675067 -0.18998790
-7.55500603 -3.90700293 -0.23500019
-7.55500174 -3.93700099 -0.11900000
-7.55471134 -3.90981555 -0.21693429
-7.55462122 -3.91398454 -0.20096511
-7.55438805 -3.91271901 -0.20603789
-7.55425310 -3.90835190 -0.22613440
-7.55424309 -3.96152210 -0.06410770
-7.55348587 -3.93887138 -0.11470590
-7.55325794 -3.90613341 -0.23800810
-7.55317831 -3.91443110 -0.19667760
-7.55308676 -3.91504478 -0.19300219
-7.55299997 -4.00299978 0.00800000
-7.55299997 -3.90300012 -0.25900000
-7.55282354 -3.95390725 -0.07799820
-7.55282259 -3.90887308 -0.21893691
-7.55273199 -3.96385932 -0.05899790
-7.55250692 -3.91216755 -0.20772080
-7.55234718 -3.90743589 -0.22900410
-7.55234671 -3.97818255 -0.03100140
-7.55200386 -3.94200158 -0.10600010
-7.55200005 -3.96900010 -0.04900000
-7.55179167 -3.90489197 -0.23999339
-7.55112553 -3.96202540 -0.06155420
-7.55100012 -3.93499994 -0.12200000
-7.55100012 -3.90199995 -0.26400000
-7.55094624 -3.90793657 -0.22193959
-7.55094051 -3.90562010 -0.23624140
-7.55026722 -3.91413832 -0.19500691
-7.55013657 -3.90407062 -0.24300440
-7.55000019 -3.99799967 0.00300000
-7.55000019 -3.99200010 -0.00800000
-7.54996347 -3.91180730 -0.20302610
-7.54980993 -3.91093779 -0.21105060
-7.54970837 -3.99989533 0.00541710
-7.54948378 -3.95525336 -0.07300470
-7.54912043 -3.90185452 -0.26026160
-7.54910898 -3.90702105 -0.22394390
-7.54895830 -3.93599629 -0.11877380
-7.54873848 -3.96055579 -0.06286630
-7.54859734 -3.95892787 -0.06528350
-7.54841280 -3.93488765 -0.12115570
-7.54836702 -3.91103983 -0.20492449
-7.54822397 -3.91211581 -0.19800590
-7.54820633 -3.90410709 -0.24600670
-7.54818439 -3.95109701 -0.08000200
-7.54799986 -3.94000030 -0.10900000
-7.54795504 -3.95414233 -0.07522310
-7.54761600 -3.90983701 -0.21404579
-7.54760265 -3.97873163 -0.02851260
-7.54729700 -3.90611887 -0.22694880
-7.54728031 -3.90345812 -0.24170239
-7.54699993 -4.00299978 0.01100000
-7.54699993 -3.97499990 -0.03300000
-7.54647350 -3.95230961 -0.07742690
-7.54646921 -3.99971890 0.00599960
-7.54604912 -3.90202498 -0.25100160
-7.54603863 -3.91102028 -0.20100100
-7.54600000 -3.89899993 -0.27800000
-7.54585457 -3.93488121 -0.12007610
-7.54584503 -3.90968943 -0.21122479
-7.54557848 -3.90331984 -0.23914640
-7.54554749 -3.90524840 -0.22995581
-7.54543066 -3.90874076 -0.21704111
-7.54538107 -3.90245676 -0.24830170
-7.54500008 -4.05399990 0.07500000
-7.54465103 -3.90181947 -0.25398830
-7.54443264 -3.95060039 -0.07904950
-7.54425955 -3.95313597 -0.07500260
-7.54407692 -4.00244665 0.01132330
-7.54391766 -3.90995717 -0.20299780
-7.54384422 -3.90440178 -0.23196450
-7.54384041 -3.90285659 -0.24532691
-7.54359674 -3.90842271 -0.21521780
-7.54353333 -3.90918231 -0.20983560
-7.54341745 -3.95715427 -0.06579440
-7.54339314 -3.94920588 -0.08300430
-7.54331017 -3.95516253 -0.07000290
-7.54329443 -3.90767074 -0.21903761
-7.54316235 -3.90108371 -0.25600550
-7.54300022 -4.00400019 0.01400000
-7.54228926 -3.90311480 -0.23494670
-7.54216433 -3.97429752 -0.03284000
-7.54173326 -3.90886140 -0.20599270
-7.54169846 -3.90521669 -0.22481960
-7.54167891 -3.90083408 -0.25898901
-7.54161167 -3.90583491 -0.22204749
-7.54137230 -3.90081644 -0.25143859
-7.54099989 -4.05499983 0.07800000
-7.54087830 -3.99893570 0.00799990
-7.54066849 -3.90136647 -0.24685609
-7.54053402 -3.90224171 -0.23695390
-7.54016972 -4.05175304 0.07439280
-7.54008961 -3.94845152 -0.08240320
-7.53999996 -3.99600029 0.00300000
-7.53999996 -3.93299985 -0.12200000
-7.53999996 -3.89899993 -0.39199999
-7.53999043 -3.90754867 -0.21347140
-7.53982830 -3.94991040 -0.07799820
-7.53952885 -3.89975643 -0.26398349
-7.53927040 -3.90814018 -0.20800750
-7.53900003 -3.89599991 -0.31400001
-7.53900003 -3.89599991 -0.31700000
-7.53887892 -3.90449977 -0.22498339
-7.53887033 -3.94693255 -0.08499850
-7.53883123 -3.89891291 -0.26699400
-7.53879070 -3.90137386 -0.23996150
-7.53824997 -3.99932790 0.00934440
-7.53804064 -3.95302105 -0.07200040
-7.53800011 -3.89800000 -0.38699999
-7.53800011 -3.90100002 -0.40799999
-7.53763056 -3.90523005 -0.22013460
-7.53700018 -4.04899979 0.07200000
-7.53695536 -3.90697694 -0.21099870
-7.53682089 -3.90138936 -0.24196211
-7.53664255 -3.89733267 -0.27202320
-7.53643131 -3.95522690 -0.06700380
-7.53641224 -3.90021372 -0.40502220
-7.53634501 -3.90167642 -0.23614649
-7.53630638 -4.00016308 0.01100040
-7.53602123 -3.89715528 -0.27711651
-7.53599977 -3.97300029 -0.03300000
-7.53599977 -3.89700007 -0.38100001
-7.53565025 -3.90333700 -0.23001990
-7.53561687 -3.90028429 -0.24495500
-7.53552532 -3.94552565 -0.08644410
-7.53482485 -3.94790816 -0.07999810
-7.53459454 -3.90578985 -0.21398850
-7.53458834 -3.89978719 -0.40297800
-7.53448582 -3.89921689 -0.24795020
-7.53445339 -3.89901638 -0.25210831
-7.53433514 -3.90223384 -0.23297830
-7.53409338 -3.89653134 -0.27996629
-7.53408146 -3.99604344 0.00600010
-7.53401709 -3.95321250 -0.06892600
-7.53399992 -3.89599991 -0.37599999
-7.53391933 -3.90360069 -0.22179280
-7.53390169 -3.89697099 -0.27025279
-7.53385401 -3.89592409 -0.28299451
-7.53347778 -3.94972658 -0.07499480
-7.53299999 -3.89599991 -0.37099999
-7.53299999 -3.89899993 -0.40000001
-7.53293324 -3.89705968 -0.38768029
-7.53264761 -3.89936018 -0.40586010
-7.53242254 -3.90121889 -0.23501320
-7.53240442 -3.90420961 -0.21601160
-7.53208447 -3.89504361 -0.28800321
-7.53200006 -4.04899979 0.07500000
-7.53200006 -3.89499998 -0.36800000
-7.53198290 -3.89654899 -0.27358121
-7.53168249 -3.89831781 -0.25295570
-7.53156281 -3.95176983 -0.06999590
-7.53141785 -3.90353179 -0.21888350
-7.53127098 -3.89648676 -0.26821521
-7.53067970 -3.90035248 -0.23702140
-7.53066397 -3.89730883 -0.25595459
-7.53062057 -3.89673042 -0.25867179
-7.53044224 -3.89843297 -0.40263349
-7.53024960 -3.89644527 -0.26487419
-7.53017950 -3.94509363 -0.08300200
-7.53017855 -3.89409256 -0.29300699
-7.53000021 -3.89700007 -0.39399999
-7.52991390 -3.90187693 -0.22563951
-7.52990007 -3.89563441 -0.27789989
-7.52987909 -3.99593544 0.00799990
-7.52983809 -3.89902663 -0.24441570
-7.52942944 -3.89522600 -0.37690240
-7.52936697 -3.90214705 -0.22265530
-7.52925873 -3.94213533 -0.09100310
-7.52925301 -3.99376178 0.00482260
-7.52916241 -3.89408398 -0.29600641
-7.52887058 -3.89945054 -0.24002770
-7.52882290 -3.89445186 -0.28603971
-7.52876949 -3.89851022 -0.40731969
-7.52830935 -3.94716215 -0.07800320
-7.52829790 -3.90021181 -0.23325910
-7.52823544 -3.89660430 -0.26097351
-7.52800035 -3.89300013 -0.30100000
-7.52799988 -3.89599991 -0.39199999
-7.52787781 -3.99193549 0.00300000
-7.52766228 -3.89456916 -0.28041559
-7.52764082 -3.89444470 -0.37527969
-7.52729225 -3.89704680 -0.25320300
-7.52711678 -3.89306045 -0.30400470
-7.52709532 -3.89856720 -0.24303541
-7.52699995 -3.89299989 -0.35200000
-7.52699995 -3.89599991 -0.38900000
-7.52686739 -3.89721155 -0.40187371
-7.52660227 -3.89527631 -0.26595059
-7.52653551 -3.89227700 -0.34902480
-7.52649355 -3.89525580 -0.38602531
-7.52640152 -3.94921088 -0.07200380
-7.52623558 -3.94175196 -0.08832460
-7.52614546 -3.89207530 -0.34600669
-7.52610397 -3.89553618 -0.26896799
-7.52604580 -3.89202380 -0.30900189
-7.52600050 -3.90100050 -0.22400001
-7.52600002 -3.89800000 -0.41000000
-7.52593088 -3.89721656 -0.25046399
-7.52585554 -3.89465880 -0.27643210
-7.52580404 -3.89319873 -0.36650240
-7.52573395 -3.89186263 -0.34098789
-7.52573109 -3.94817400 -0.07472670
-7.52566814 -3.89296770 -0.29398489
-7.52561903 -3.89726377 -0.40517151
-7.52557564 -3.89781618 -0.24505129
-7.52549887 -3.89477587 -0.38307631
-7.52534008 -3.89217591 -0.31201410
-7.52525520 -3.94313359 -0.08600290
-7.52525377 -3.89513111 -0.27200910
-7.52523088 -3.89557862 -0.39429539
-7.52522182 -3.89211488 -0.33801001
-7.52516556 -3.94694471 -0.07698160
-7.52500057 -3.89200020 -0.31700000
-7.52498960 -3.89199448 -0.31999949
-7.52496386 -3.89198136 -0.33499840
-7.52489853 -3.89263701 -0.29120249
-7.52486515 -3.89193010 -0.32499421
-7.52476406 -3.94024372 -0.09154430
-7.52440023 -3.89672494 -0.24804620
-7.52408028 -3.90004182 -0.22700240
-7.52388191 -3.89389372 -0.27846879
-7.52370358 -3.89931369 -0.23037840
-7.52359295 -3.89730763 -0.40803221
-7.52353668 -3.89893126 -0.23488240
-7.52332354 -3.89192390 -0.29673609
-7.52325916 -3.99029064 0.00177830
-7.52319193 -3.89112449 -0.30724660
-7.52317286 -3.94509077 -0.08000180
-7.52307653 -3.89535642 -0.25678641
-7.52299976 -3.89400005 -0.37799999
-7.52295399 -3.89600587 -0.25369671
-7.52295208 -3.89126873 -0.30988890
-7.52287912 -3.96246314 -0.04400510
-7.52277517 -3.99288058 0.00599980
-7.52269650 -3.89138556 -0.31514269
-7.52268887 -3.89687490 -0.25005621
-7.52263546 -3.89171433 -0.30157411
-7.52252913 -3.89327335 -0.37502629
-7.52247810 -3.89301467 -0.28357089
-7.52215958 -3.89209151 -0.28920200
-7.52199507 -3.89405990 -0.38631201
-7.52196360 -3.89459085 -0.39404601
-7.52193689 -3.89296722 -0.27999771
-7.52183723 -3.89174533 -0.29192561
-7.52182102 -3.89590693 -0.40499029
-7.52171993 -3.89237261 -0.37203559
-7.52159357 -3.89104104 -0.32228321
-7.52146101 -3.89097643 -0.34594521
-7.52125740 -3.94713545 -0.07500260
-7.52114105 -3.94007373 -0.08800160
-7.52099991 -3.98899984 0.00000000
-7.52086878 -3.89793205 -0.23199590
-7.52060652 -3.89415479 -0.26241010
-7.52030659 -3.89029956 -0.33086649
-7.52028990 -3.89040542 -0.33906141
-7.52021790 -3.93711448 -0.09600280
-7.52021074 -3.89514542 -0.25607529
-7.52007580 -3.89051056 -0.32484499
-7.51999998 -3.89200020 -0.36700001
-7.51999998 -3.89499998 -0.40200001
-7.51967001 -3.89570880 -0.24631540
-7.51963568 -3.89181161 -0.28498620
-7.51953745 -3.89049053 -0.33444190
-7.51900005 -3.93299985 -0.10400000
-7.51900005 -3.90300012 -0.20299999
-7.51900005 -3.89100003 -0.36399999
-7.51900005 -3.89400005 -0.39899999
-7.51897526 -3.89182878 -0.37061119
-7.51874781 -3.94239140 -0.08300830
-7.51873970 -3.89786482 -0.23399191
-7.51873541 -3.89035916 -0.34661409
-7.51837444 -3.89043927 -0.30177021
-7.51814890 -3.89055943 -0.28996721
-7.51802492 -3.88999200 -0.33690229
-7.51800013 -3.96300006 -0.04100000
-7.51800013 -3.95999980 -0.04700000
-7.51798916 -3.88971782 -0.30518001
-7.51791239 -3.89192033 -0.37545079
-7.51791000 -3.89529490 -0.25062031
-7.51779222 -3.89392829 -0.26106220
-7.51777554 -3.88990521 -0.31020981
-7.51757669 -3.88976622 -0.34198359
-7.51727581 -3.89062548 -0.29297179
-7.51726151 -3.88988328 -0.31675819
-7.51725721 -3.89361548 -0.39696079
-7.51698112 -3.88945723 -0.32656699
-7.51696062 -3.94397974 -0.07799960
-7.51695204 -3.89697504 -0.23699850
-7.51693726 -3.89222574 -0.38306201
-7.51688671 -3.88980842 -0.31360930
-7.51669073 -3.90235853 -0.20601889
-7.51652050 -3.89271355 -0.26692909
-7.51646757 -3.93734121 -0.09215900
-7.51641369 -3.88969636 -0.29797670
-7.51636696 -3.96059227 -0.04501780
-7.51634884 -3.93518257 -0.09800450
-7.51628923 -3.88940740 -0.33188441
-7.51601982 -3.89301038 -0.39400110
-7.51599979 -3.98899984 0.00300000
-7.51599979 -3.98000002 -0.01000000
-7.51599979 -3.96499968 -0.03600000
-7.51599979 -3.89000010 -0.35900000
-7.51577044 -3.89102745 -0.37126851
-7.51575232 -3.92179060 -0.13376190
-7.51564550 -3.89402866 -0.25309229
-7.51561403 -3.89531851 -0.24001960
-7.51554346 -3.88928151 -0.35602579
-7.51525402 -3.88913155 -0.30301031
-7.51521111 -3.89494991 -0.24382590
-7.51499987 -3.93099999 -0.10600000
-7.51499987 -3.92499995 -0.12200000
-7.51499987 -3.90100002 -0.20800000
-7.51499987 -3.89499998 -0.41299999
-7.51496410 -3.89198160 -0.39099821
-7.51491213 -3.88895464 -0.35099590
-7.51488543 -3.88945842 -0.34804100
-7.51478148 -3.93988609 -0.08599750
-7.51469707 -3.89236116 -0.26902491
-7.51469469 -3.88935971 -0.34503189
-7.51468039 -3.88883471 -0.30598700
-7.51465940 -3.89034915 -0.28660101
-7.51455355 -3.88876915 -0.33997980
-7.51410675 -3.88905549 -0.31100440
-7.51407671 -3.88903999 -0.31400320
-7.51407576 -3.89203954 -0.38800389
-7.51399994 -3.98499990 -0.00200000
-7.51398277 -3.88969278 -0.29253989
-7.51394463 -3.88897109 -0.33499750
-7.51381302 -3.88890314 -0.31899211
-7.51375532 -3.88887358 -0.33198920
-7.51370144 -3.88884568 -0.32198721
-7.51357460 -3.88878012 -0.32698151
-7.51354647 -3.94208360 -0.08088380
-7.51336575 -3.96361017 -0.03729440
-7.51325369 -3.89239287 -0.39510041
-7.51318359 -3.96009660 -0.04400110
-7.51314592 -3.89255571 -0.25820920
-7.51306963 -3.89046454 -0.37470850
-7.51300383 -3.89400172 -0.24500009
-7.51300001 -3.89100003 -0.27399999
-7.51300001 -3.89400005 -0.41000000
-7.51288462 -3.88857937 -0.34202981
-7.51263857 -3.93281078 -0.10099520
-7.51238537 -3.93476939 -0.09539860
-7.51220369 -3.88839531 -0.30531129
-7.51200008 -3.89100003 -0.38299999
-7.51186085 -3.94019485 -0.08421470
-7.51169252 -3.88852310 -0.34744599
-7.51159334 -3.89378929 -0.24798660
-7.51114655 -3.89007568 -0.27600539
-7.51100016 -3.96199989 -0.03900000
-7.51100016 -3.89000010 -0.38000000
-7.51100016 -3.89300013 -0.40700001
-7.51085854 -3.88877988 -0.29192159
-7.51073933 -3.89225173 -0.25666621
-7.51073408 -3.88817883 -0.33547339
-7.51061964 -3.98375058 -0.00294230
-7.51060820 -3.93779469 -0.08799540
-7.51050949 -3.88835669 -0.35833669
-7.51017427 -3.97709155 -0.01300030
-7.51004076 -3.89176011 -0.25912610
-7.51001024 -3.92410302 -0.12197860
-7.50948620 -3.88925219 -0.27901810
-7.50935316 -3.88789105 -0.33250520
-7.50924778 -3.93276715 -0.09771780
-7.50921822 -3.89211321 -0.25300741
-7.50899982 -3.98600006 0.00000000
-7.50899982 -3.89200020 -0.40400001
-7.50898170 -3.88947248 -0.37494910
-7.50879431 -3.88732719 -0.33867490
-7.50878286 -3.89071584 -0.26563841
-7.50866652 -3.93846679 -0.08592390
-7.50865221 -3.88777375 -0.35171109
-7.50859451 -3.93078804 -0.10399440
-7.50833941 -3.88917589 -0.28201270
-7.50813389 -3.88743639 -0.34500539
-7.50807047 -3.88903689 -0.37200350
-7.50799990 -3.95799994 -0.04700000
-7.50799990 -3.92499995 -0.11900000
-7.50799990 -3.90100002 -0.20299999
-7.50795269 -3.93997550 -0.08299950
-7.50794411 -3.88764524 -0.30340189
-7.50737381 -3.97764754 -0.01109830
-7.50737047 -3.88897252 -0.27687511
-7.50735378 -3.88750648 -0.33062181
-7.50722027 -3.88811421 -0.36901081
-7.50716877 -3.88747978 -0.35481209
-7.50716162 -3.88860202 -0.28704441
-7.50712252 -3.98206472 -0.00500010
-7.50704479 -3.89995551 -0.20667610
-7.50704193 -3.88722229 -0.30812019
-7.50699997 -3.96300006 -0.03600000
-7.50676918 -3.88715887 -0.32486829
-7.50673819 -3.89086413 -0.25799099
-7.50659037 -3.89076114 -0.39453590
-7.50658226 -3.89018440 -0.39003819
-7.50656176 -3.89284277 -0.40938190
-7.50647449 -3.88711071 -0.33422580
-7.50646639 -3.88700986 -0.34799221
-7.50646448 -3.88775849 -0.29005659
-7.50603533 -3.93601871 -0.09100040
-7.50568390 -3.88747859 -0.29956719
-7.50550175 -3.88759828 -0.29611850
-7.50530291 -3.89015698 -0.26101050
-7.50521994 -3.88711381 -0.36401069
-7.50500011 -3.96499968 -0.03100000
-7.50494432 -3.93014812 -0.10146160
-7.50481272 -3.88779426 -0.28462681
-7.50479555 -3.88792944 -0.27935719
-7.50452232 -3.88701463 -0.35698330
-7.50449991 -3.92873812 -0.10599290
-7.50443363 -3.97370005 -0.01599880
-7.50441217 -3.88721347 -0.36101979
-7.50431681 -3.97582221 -0.01315860
-7.50407028 -3.88868403 -0.27316430
-7.50400019 -4.01900005 0.04900000
-7.50400019 -3.92300034 -0.12200000
-7.50400019 -3.89899993 -0.20800000
-7.50400019 -3.89299989 -0.41200000
-7.50386429 -3.88692975 -0.30299449
-7.50385094 -3.88992262 -0.39099219
-7.50361109 -3.88979816 -0.26298639
-7.50351810 -3.93774700 -0.08499450
-7.50350618 -3.88626242 -0.30602071
-7.50350237 -3.89112306 -0.40474001
-7.50334406 -3.88666010 -0.35296911
-7.50334120 -3.88596821 -0.34225690
-7.50318384 -3.98209834 -0.00200000
-7.50299978 -3.88899994 -0.38800001
-7.50299120 -3.88599539 -0.34799960
-7.50281191 -3.93342543 -0.09301010
-7.50276804 -3.88587999 -0.34498939
-7.50223637 -3.88612247 -0.31100979
-7.50216341 -3.88608479 -0.33800739
-7.50214386 -3.93002748 -0.09897550
-7.50214338 -3.92901611 -0.10251980
-7.50212479 -3.97985983 -0.00593120
-7.50210190 -3.89205289 -0.40900561
-7.50208426 -3.88604355 -0.33500370
-7.50203514 -3.88601828 -0.32400149
-7.50201178 -3.88600636 -0.32900059
-7.50200462 -3.88600230 -0.33200020
-7.50199986 -3.95199990 -0.05500000
-7.50199986 -3.88899994 -0.26600000
-7.50177717 -3.93500400 -0.09088490
-7.50157881 -3.93595791 -0.08742160
-7.50130844 -3.88515949 -0.31601301
-7.50122070 -3.88711190 -0.27791241
-7.50107336 -3.88503766 -0.31900311
-7.50103378 -3.88675570 -0.28591469
-7.50101280 -3.92700696 -0.10900020
-7.50099993 -3.95999980 -0.03900000
-7.50087738 -3.97793531 -0.00799990
-7.50081491 -3.88621330 -0.29315621
-7.50062180 -3.97318697 -0.01572660
-7.50033569 -3.89117432 -0.40701821
-7.50026083 -3.97513819 -0.01300050
-7.50016212 -3.88656139 -0.36793110
-7.50000000 -4.02899981 0.06200000
-7.50000000 -3.88800001 -0.27100000
-7.49997711 -3.93256068 -0.09603810
-7.49938917 -3.88720179 -0.27401420
-7.49926043 -3.96213770 -0.03400120
-7.49909163 -3.93504834 -0.08800110
-7.49900007 -3.88700008 -0.37700000
-7.49890137 -3.97961020 -0.00493700
-7.49889755 -3.88586020 -0.36451939
-7.49879265 -3.88450527 -0.31674099
-7.49872684 -3.88479447 -0.34633380
-7.49865627 -3.88553119 -0.35742849
-7.49846697 -3.88614631 -0.27946109
-7.49834061 -3.88536620 -0.35442880
-7.49833012 -3.88617063 -0.37401640
-7.49831963 -3.92693901 -0.10614880
-7.49831533 -3.88546610 -0.35188940
-7.49800014 -3.89599991 -0.21300000
-7.49799109 -3.97099471 -0.01800000
-7.49791527 -3.88414359 -0.31337121
-7.49769068 -3.88459110 -0.34866571
-7.49712372 -3.88518691 -0.28718019
-7.49706268 -3.88468051 -0.30901501
-7.49691534 -3.94895577 -0.05699940
-7.49687147 -3.92493272 -0.11099810
-7.49664068 -3.89481330 -0.21598960
-7.49617577 -3.88609147 -0.36900869
-7.49613571 -3.88607049 -0.28200510
-7.49602461 -3.88481641 -0.35962611
-7.49599981 -4.01499987 0.04600000
-7.49599981 -3.90300012 -0.17600000
-7.49599981 -3.89700007 -0.20299999
-7.49558592 -3.88480544 -0.29081920
-7.49557066 -3.93034792 -0.09903400
-7.49546385 -3.88524055 -0.36602271
-7.49545002 -3.88462520 -0.35528970
-7.49500513 -4.01662302 0.04833300
-7.49499989 -3.95399976 -0.04700000
-7.49499989 -3.89400005 -0.21799999
-7.49485016 -3.88389468 -0.34340009
-7.49473953 -3.97186208 -0.01599940
-7.49467278 -3.88426208 -0.30414629
-7.49466848 -3.88451099 -0.36253640
-7.49425459 -3.93313360 -0.09100310
-7.49399996 -4.02899981 0.06400000
-7.49399996 -3.97499990 -0.01000000
-7.49399996 -3.96300006 -0.03100000
-7.49399996 -3.90199995 -0.17900001
-7.49399996 -3.89599991 -0.20500000
-7.49373865 -3.95886183 -0.03699870
-7.49357748 -3.92625427 -0.10398030
-7.49347115 -3.93072653 -0.09474680
-7.49340773 -3.88421154 -0.35801950
-7.49335432 -3.96134377 -0.03311600
-7.49311161 -3.88405776 -0.29200429
-7.49274397 -3.88386726 -0.29498991
-7.49268913 -3.88383865 -0.35298529
-7.49263477 -4.01447105 0.04629530
-7.49260187 -3.92279172 -0.11399390
-7.49236012 -3.88353014 -0.34051019
-7.49221849 -4.02618551 0.06055470
-7.49214888 -3.88307691 -0.34700689
-7.49213696 -3.92729235 -0.10198040
-7.49213123 -3.88406801 -0.35000610
-7.49200010 -3.96700025 -0.02100000
-7.49200010 -3.88599992 -0.26300001
-7.49187803 -3.88393664 -0.30199510
-7.49187088 -3.94593239 -0.05999900
-7.49168587 -3.88319874 -0.30688921
-7.49161959 -3.88274121 -0.31469011
-7.49134254 -3.92934632 -0.09736270
-7.49100018 -3.97600007 -0.00800000
-7.49026108 -3.95956779 -0.03519460
-7.49013948 -3.93007374 -0.09300170
-7.48999977 -3.95099998 -0.04900000
-7.48999596 -3.92333412 -0.10958260
-7.48998737 -3.88499379 -0.26599959
-7.48985338 -3.88292432 -0.31099391
-7.48938704 -3.92415500 -0.10697700
-7.48937035 -4.02417707 0.05877660
-7.48925066 -3.94684267 -0.05803490
-7.48924828 -3.89555240 -0.20348620
-7.48912191 -3.88206339 -0.31600511
-7.48899984 -3.89400005 -0.21300000
-7.48899412 -3.88536596 -0.26350471
-7.48891830 -3.92206192 -0.11282550
-7.48891449 -3.96895456 -0.01799980
-7.48843050 -3.92828274 -0.09799490
-7.48839521 -3.92020679 -0.11700620
-7.48800087 -3.95600128 -0.03900000
-7.48799992 -3.97099972 -0.01300000
-7.48799992 -3.89899993 -0.18400000
-7.48795366 -3.92872143 -0.09535030
-7.48699999 -4.01300001 0.04600000
-7.48698997 -3.89299512 -0.21599969
-7.48694849 -3.92098260 -0.11415590
-7.48676395 -3.90082479 -0.17833820
-7.48676014 -3.92544699 -0.10403840
-7.48675585 -3.96737981 -0.02001140
-7.48674154 -3.94686365 -0.05699800
-7.48673153 -3.92213559 -0.11035590
-7.48666239 -3.94334841 -0.06200550
-7.48634481 -4.02518606 0.06100280
-7.48600006 -3.88899994 -0.23100001
-7.48590803 -3.95109916 -0.04819320
-7.48546124 -3.92771745 -0.09599310
-7.48500013 -3.90100002 -0.17600000
-7.48500013 -3.89499998 -0.20200001
-7.48494434 -3.89797115 -0.18699861
-7.48487902 -3.91986370 -0.11528100
-7.48442125 -3.92517734 -0.10275170
-7.48414850 -3.97073793 -0.01227260
-7.48413610 -3.91807127 -0.11900220
-7.48404551 -3.95640039 -0.03773200
-7.48400736 -3.88816524 -0.23318020
-7.48400021 -4.02099991 0.05600000
-7.48400021 -3.97199988 -0.01000000
-7.48345661 -3.88223672 -0.28701749
-7.48299980 -3.96599984 -0.02100000
-7.48299980 -3.90000010 -0.17900001
-7.48299980 -3.89400005 -0.20500000
-7.48294735 -3.92086005 -0.11094090
-7.48291588 -3.92592549 -0.09962000
-7.48251629 -3.92331982 -0.10603570
-7.48249102 -3.89625549 -0.18901239
-7.48235178 -3.96818662 -0.01600080
-7.48234606 -3.95318341 -0.04200190
-7.48199987 -3.99499989 0.02500000
-7.48168993 -3.94083691 -0.06499730
-7.48139238 -3.94420695 -0.06000310
-7.48099995 -3.88400006 -0.26300001
-7.48068571 -3.91690946 -0.11968280
-7.48067331 -3.92582870 -0.09799570
-7.48065090 -3.92140818 -0.10952290
-7.48024702 -3.91951013 -0.11263750
-7.48012877 -3.89506698 -0.19200329
-7.48010445 -3.92315078 -0.10471700
-7.48008490 -3.91604424 -0.12200140
-7.48000002 -3.99099994 0.02000000
-7.48000002 -3.96100020 -0.02600000
-7.47990942 -3.91807818 -0.11591600
-7.47973728 -3.89727640 -0.18492740
-7.47933769 -3.88317537 -0.26601201
-7.47926235 -3.96918321 -0.01347290
-7.47925043 -3.92388868 -0.10164860
-7.47900009 -4.02099991 0.05800000
-7.47900009 -3.94899988 -0.04900000
-7.47800732 -3.89400363 -0.19400020
-7.47800016 -3.88199997 -0.26800001
-7.47782850 -3.95390892 -0.03899910
-7.47775650 -3.88719010 -0.23214090
-7.47721767 -3.91806579 -0.11397280
-7.47700024 -3.93800020 -0.06800000
-7.47700024 -3.89700007 -0.18400000
-7.47648764 -3.94125748 -0.06200400
-7.47637796 -3.96567011 -0.01799850
-7.47630787 -3.92316246 -0.10100420
-7.47626638 -3.91413927 -0.12400440
-7.47599983 -3.89299989 -0.19700000
-7.47550869 -3.95170045 -0.04214130
-7.47534752 -3.89439321 -0.19096041
-7.47499990 -3.99099994 0.02200000
-7.47499990 -3.88700008 -0.23100001
-7.47477007 -3.89588022 -0.18699430
-7.47452736 -3.91884947 -0.11205290
-7.47449732 -3.99308610 0.02439500
-7.47433996 -3.92078924 -0.10655210
-7.47416782 -3.92201209 -0.10277250
-7.47410059 -3.98840332 0.01844620
-7.47399998 -3.88599992 -0.23400000
-7.47391939 -3.95972419 -0.02609990
-7.47351933 -3.91570067 -0.11696120
-7.47300005 -3.95799994 -0.02900000
-7.47287273 -3.91387653 -0.12211640
-7.47273874 -3.91186309 -0.12699559
-7.47268248 -3.89275718 -0.19492669
-7.47267437 -3.93807054 -0.06651370
-7.47226143 -3.95113850 -0.04200150
-7.47203779 -3.92101979 -0.10400050
-7.47200012 -3.88199997 -0.40000001
-7.47163677 -3.91961455 -0.10849540
-7.47122526 -3.96511889 -0.01600050
-7.47100019 -3.99299979 0.02500000
-7.47092628 -3.92191219 -0.10143800
-7.47091389 -3.96327901 -0.01894760
-7.47058058 -3.91687679 -0.11405470
-7.47030306 -3.89315820 -0.19200779
-7.46999979 -3.95900011 -0.02600000
-7.46999979 -3.87800002 -0.28600001
-7.46999979 -3.87800002 -0.28900000
-7.46993876 -3.91827059 -0.11027910
-7.46964121 -3.91376328 -0.11996210
-7.46904182 -3.91002178 -0.13000070
-7.46899986 -3.88899994 -0.20500000
-7.46899986 -3.87700009 -0.29400000
-7.46875048 -3.91178298 -0.12486550
-7.46809483 -3.89204931 -0.19400249
-7.46799994 -3.94000030 -0.06000000
-7.46799994 -3.87700009 -0.29699999
-7.46799994 -3.88000011 -0.39199999
-7.46772766 -3.91885686 -0.10599610
-7.46715307 -3.98788500 0.01981080
-7.46700001 -3.94799972 -0.04500000
-7.46700001 -3.93600011 -0.06800000
-7.46700001 -3.87899995 -0.38900000
-7.46678257 -3.91596317 -0.11263280
-7.46665621 -3.96111059 -0.02052760
-7.46658897 -3.91535735 -0.11704060
-7.46638107 -3.92120004 -0.10100520
-7.46600008 -3.93299985 -0.07300000
-7.46600008 -3.89100003 -0.19700000
-7.46600008 -3.87899995 -0.26800001
-7.46600008 -3.87599993 -0.30199999
-7.46600008 -3.87599993 -0.30500001
-7.46582747 -3.91186166 -0.12196450
-7.46568060 -3.90970564 -0.12740441
-7.46557665 -3.90830159 -0.13201021
-7.46521187 -3.91097546 -0.12451200
-7.46504736 -3.96202493 -0.01800010
-7.46500063 -3.87500024 -0.33100000
-7.46500015 -3.87500000 -0.32800001
-7.46500015 -3.87500000 -0.33399999
-7.46466303 -3.87782478 -0.26998779
-7.46450138 -3.87905216 -0.39106870
-7.46421385 -3.95911360 -0.02400070
-7.46400690 -3.87609243 -0.29418099
-7.46400023 -3.98899984 0.02200000
-7.46400023 -3.95600033 -0.02900000
-7.46397114 -3.91513944 -0.11300150
-7.46390676 -3.91695094 -0.10899860
-7.46328878 -3.91448855 -0.11648230
-7.46309423 -3.91309810 -0.11903340
-7.46304417 -3.93702316 -0.06300040
-7.46299982 -3.87700009 -0.27300000
-7.46261406 -3.90936351 -0.12625130
-7.46225452 -3.90713334 -0.13500459
-7.46213865 -3.91907239 -0.10400190
-7.46199989 -4.01200008 0.05300000
-7.46199989 -3.95199990 -0.03400000
-7.46199989 -3.88000011 -0.40000001
-7.46178102 -3.90787339 -0.12948170
-7.46136856 -3.88788199 -0.20343900
-7.46122122 -3.93011689 -0.07600230
-7.46117449 -3.95708442 -0.02504410
-7.46099997 -3.94199967 -0.05200000
-7.46099997 -3.87599993 -0.28600001
-7.46099997 -3.87899995 -0.39700001
-7.46006918 -3.87410116 -0.33078390
-7.46000004 -3.87599993 -0.28099999
-7.46000004 -3.87599993 -0.28900000
-7.45976830 -4.01066256 0.05215460
-7.45974636 -3.90486693 -0.13699530
-7.45925045 -4.00817156 0.04970310
-7.45924950 -3.91117954 -0.12203680
-7.45919847 -3.91343427 -0.11572860
-7.45911074 -3.87641883 -0.27188399
-7.45908785 -3.95904613 -0.02100020
-7.45895767 -3.91230559 -0.11803320
-7.45867300 -3.90778065 -0.12696040
-7.45857143 -3.87734461 -0.38911289
-7.45845079 -3.95523930 -0.02600160
-7.45800018 -3.93800020 -0.06000000
-7.45800018 -3.88700008 -0.20500000
-7.45800018 -3.87500000 -0.29400000
-7.45800018 -3.87500000 -0.29699999
-7.45800018 -3.87500000 -0.35699999
-7.45800018 -3.87500000 -0.36000001
-7.45800018 -3.87800002 -0.39199999
-7.45751333 -3.87546730 -0.28020051
-7.45708609 -3.99612689 0.03452230
-7.45704269 -3.87683511 -0.26908231
-7.45699978 -4.00600004 0.04800000
-7.45699978 -3.99400020 0.03200000
-7.45699978 -3.94899988 -0.03700000
-7.45699978 -3.93099999 -0.07300000
-7.45699978 -3.87400031 -0.30199999
-7.45659733 -3.87347054 -0.32911760
-7.45657921 -3.93969464 -0.05415420
-7.45651150 -3.90374446 -0.13999081
-7.45620966 -3.92811084 -0.07800220
-7.45617056 -3.91308951 -0.11400260
-7.45601463 -3.91086388 -0.11958040
-7.45598173 -3.95447659 -0.02690520
-7.45534849 -3.90923166 -0.12503940
-7.45499992 -3.87299991 -0.34900001
-7.45499992 -3.87299991 -0.35200000
-7.45484257 -3.90492082 -0.13364610
-7.45434570 -3.93468642 -0.06343810
-7.45426273 -3.94920778 -0.03586720
-7.45400000 -3.99600029 0.03500000
-7.45400000 -3.87299991 -0.32800001
-7.45400000 -3.87299991 -0.33300000
-7.45398760 -3.87599349 -0.26999959
-7.45334673 -3.95618439 -0.02400110
-7.45329046 -3.90318489 -0.13671710
-7.45313454 -3.90207028 -0.14200260
-7.45300007 -4.00699997 0.05000000
-7.45300007 -3.93200016 -0.06800000
-7.45268917 -3.91083717 -0.11699510
-7.45227385 -3.92814445 -0.07500280
-7.45225525 -3.95313549 -0.02900100
-7.45204735 -3.90445328 -0.13194770
-7.45199966 -3.95000029 -0.03400000
-7.45199966 -3.87500000 -0.27200001
-7.45173120 -3.90690804 -0.12702949
-7.45158482 -3.90916419 -0.12111730
-7.45100021 -3.94000030 -0.05200000
-7.45042753 -3.90744352 -0.12473790
-7.44999981 -3.87400031 -0.27800000
-7.44987202 -3.89993310 -0.14499751
-7.44981766 -3.90170002 -0.14021030
-7.44937897 -3.92692709 -0.07706650
-7.44937468 -3.99253702 0.03207760
-7.44908667 -3.90247393 -0.13494720
-7.44899988 -4.00199986 0.04500000
-7.44899988 -3.99000001 0.03000000
-7.44877672 -3.93288255 -0.06499810
-7.44875622 -3.90887165 -0.11899610
-7.44821596 -3.90516210 -0.13003869
-7.44803286 -3.90744305 -0.12322110
-7.44800138 -3.95300055 -0.02600000
-7.44732571 -3.95095778 -0.03008460
-7.44700003 -3.94700003 -0.03700000
-7.44693327 -3.89931130 -0.14457931
-7.44639397 -3.89820647 -0.14800780
-7.44613409 -3.90259528 -0.13455079
-7.44582844 -3.90086222 -0.13795979
-7.44563007 -3.90528178 -0.12735730
-7.44503403 -3.90701795 -0.12200060
-7.44500017 -4.00299978 0.04800000
-7.44500017 -3.93699980 -0.05500000
-7.44500017 -3.88000011 -0.22000000
-7.44496441 -3.90355444 -0.13205260
-7.44399977 -3.93000007 -0.06800000
-7.44299936 -3.89700007 -0.15000001
-7.44298983 -3.87899518 -0.22299971
-7.44265270 -3.94981623 -0.02899860
-7.44239140 -3.90120602 -0.13650849
-7.44225645 -3.89956260 -0.13994840
-7.44223452 -3.94712472 -0.03400110
-7.44217443 -4.00014496 0.04532990
-7.44199991 -3.98600006 0.02700000
-7.44190311 -3.89745474 -0.14561801
-7.44156170 -3.90351725 -0.12911551
-7.44104624 -3.98756242 0.02909540
-7.44099998 -3.87800002 -0.22499999
-7.44092512 -3.89680028 -0.14795031
-7.44057989 -3.90409899 -0.12608920
-7.44008780 -3.89504623 -0.15300180
-7.43999958 -4.00299978 0.05000000
-7.43999958 -3.99699998 0.04200000
-7.43999958 -3.93099999 -0.06300000
-7.43960094 -3.99983025 0.04597160
-7.43884230 -3.89786935 -0.14295860
-7.43839931 -3.94561481 -0.03489420
-7.43800020 -4.01100016 0.06000000
-7.43777657 -3.90340805 -0.12701330
-7.43691444 -3.89395571 -0.15499820
-7.43682766 -3.94690919 -0.03099930
-7.43656301 -3.87774348 -0.22285320
-7.43599987 -4.01300001 0.06300000
-7.43599987 -3.99799967 0.04500000
-7.43584347 -3.90073657 -0.13266630
-7.43534756 -3.94018412 -0.04200200
-7.43499994 -3.92800021 -0.06600000
-7.43499994 -3.87199998 -0.25400001
-7.43498421 -4.00172901 0.04966560
-7.43490458 -3.89852285 -0.14005470
-7.43478584 -3.90088773 -0.12999620
-7.43417883 -3.89209390 -0.15800381
-7.43412733 -3.87106705 -0.25700441
-7.43405628 -3.94492364 -0.03370910
-7.43404150 -3.94140506 -0.03987010
-7.43371534 -3.89461875 -0.14897060
-7.43315220 -3.89921212 -0.13459320
-7.43314981 -3.99992299 0.04798530
-7.43301058 -3.87700582 -0.22300030
-7.43300009 -3.99299979 0.04000000
-7.43206358 -3.89809299 -0.13866431
-7.43200016 -3.98400021 0.02700000
-7.43200016 -3.87299991 -0.23800001
-7.43200016 -3.86999989 -0.26199999
-7.43194580 -3.90221071 -0.12583730
-7.43160534 -3.89979291 -0.13199300
-7.43155384 -3.89633894 -0.14204881
-7.43100023 -3.87599993 -0.22600000
-7.43069410 -3.94383812 -0.03399860
-7.43005848 -3.92729521 -0.06500990
-7.42999983 -4.00099993 0.05000000
-7.42999983 -3.93699980 -0.04500000
-7.42999983 -3.92899990 -0.06300000
-7.42999983 -3.86899996 -0.26699999
-7.42958355 -3.89657712 -0.14038830
-7.42928314 -3.89257669 -0.15094480
-7.42899990 -3.93400025 -0.05000000
-7.42885351 -3.94215679 -0.03715980
-7.42883444 -3.88891315 -0.16299640
-7.42842913 -3.89770055 -0.13498960
-7.42822981 -3.90112090 -0.12700389
-7.42799950 -4.00899982 0.06000000
-7.42799950 -3.99400020 0.04200000
-7.42799950 -3.86800003 -0.27000001
-7.42782784 -3.89495850 -0.14503570
-7.42767715 -3.86929941 -0.26135129
-7.42712164 -3.87012720 -0.25476661
-7.42707443 -3.89006734 -0.15804569
-7.42666054 -3.93888116 -0.04200940
-7.42634630 -3.89578438 -0.13979420
-7.42619705 -3.89105558 -0.15296289
-7.42600012 -3.98899984 0.03700000
-7.42577267 -3.88788080 -0.16599490
-7.42556906 -3.99191117 0.04020650
-7.42533207 -3.88853502 -0.16173810
-7.42525101 -3.86907101 -0.26039419
-7.42500019 -3.92600012 -0.06500000
-7.42479992 -3.89294362 -0.14803590
-7.42471218 -3.89600444 -0.13774580
-7.42460537 -3.93643427 -0.04492130
-7.42443609 -3.94061852 -0.03758100
-7.42420149 -3.99008107 0.03849440
-7.42314816 -3.88955379 -0.15598211
-7.42304754 -3.86902475 -0.25900170
-7.42291737 -3.88595676 -0.16799811
-7.42229986 -3.89388680 -0.14119570
-7.42199993 -3.99699998 0.04700000
-7.42199993 -3.86800003 -0.26199999
-7.42166233 -3.89139581 -0.15005380
-7.42100191 -3.93610024 -0.04474270
-7.42100000 -3.99000001 0.03900000
-7.42093229 -3.93100595 -0.05160900
-7.42022371 -3.88811707 -0.15800481
-7.42000008 -3.92000008 -0.07300000
-7.41995907 -3.88397837 -0.17099909
-7.41981077 -3.93698597 -0.04176240
-7.41957140 -3.88715172 -0.16050220
-7.41900063 -3.93200016 -0.05000000
-7.41900063 -3.86700010 -0.26699999
-7.41900063 -3.86599994 -0.38800001
-7.41878986 -3.88946295 -0.15305761
-7.41874409 -3.89106154 -0.14840201
-7.41827440 -3.88472271 -0.16746150
-7.41754913 -3.86528611 -0.38502851
-7.41709328 -3.89204907 -0.14200179
-7.41699982 -3.86800003 -0.40900001
-7.41697693 -3.88525200 -0.16481610
-7.41643620 -3.88322854 -0.17301020
-7.41625071 -3.88340116 -0.16918489
-7.41599989 -3.86500001 -0.38299999
-7.41550827 -3.88831520 -0.15505239
-7.41534424 -3.91818213 -0.07600350
-7.41499996 -3.86700010 -0.40700001
-7.41472530 -3.88485599 -0.16299400
-7.41411448 -3.89006042 -0.14500220
-7.41404629 -3.88102388 -0.17600110
-7.41400003 -3.92899990 -0.05200000
-7.41400003 -3.86999989 -0.42199999
-7.41379356 -3.93242121 -0.04700500
-7.41300011 -3.88400006 -0.48699999
-7.41290855 -3.93495154 -0.04199950
-7.41244841 -3.88675952 -0.15803090
-7.41240025 -3.89113069 -0.14217210
-7.41200018 -3.86800003 -0.41700000
-7.41198349 -3.86417341 -0.38527861
-7.41196108 -3.88815141 -0.15042441
-7.41178131 -3.88336110 -0.16597269
-7.41147137 -3.88118529 -0.17399670
-7.41131353 -3.88016462 -0.17800750
-7.41116190 -3.93354464 -0.04373910
-7.41099977 -3.91599989 -0.07800000
-7.41087341 -3.88187194 -0.16881099
-7.41069317 -3.88883924 -0.14799391
-7.41038036 -3.88248301 -0.48490950
-7.41000032 -3.98099971 0.03200000
-7.41000032 -3.91799998 -0.07300000
-7.41000032 -3.86999989 -0.22000000
-7.40945244 -3.88523722 -0.16100980
-7.40936852 -3.88717723 -0.15201120
-7.40934420 -3.87937450 -0.17961310
-7.40899992 -3.86100006 -0.29300001
-7.40799999 -3.86400008 -0.38800001
-7.40799952 -3.92899942 -0.05000000
-7.40769339 -3.93183708 -0.04499810
-7.40768719 -3.88046837 -0.17265530
-7.40742922 -3.86922359 -0.22301289
-7.40718222 -3.86309481 -0.38500950
-7.40716791 -3.88539600 -0.15639190
-7.40700006 -3.87800002 -0.18400000
-7.40700006 -3.86599994 -0.40900001
-7.40699339 -3.93005800 -0.04772630
-7.40671062 -3.91631293 -0.07534510
-7.40667152 -3.88335204 -0.16301480
-7.40620804 -3.89010930 -0.14200400
-7.40600014 -3.86299992 -0.38200000
-7.40544462 -3.86823225 -0.22501349
-7.40539646 -3.98001075 0.03238940
-7.40500021 -3.86500001 -0.40599999
-7.40500021 -3.88299990 -0.48899999
-7.40490580 -3.88595033 -0.15299810
-7.40457487 -3.87767744 -0.18233620
-7.40416670 -3.88385439 -0.15999730
-7.40399981 -3.86700010 -0.22800000
-7.40399981 -3.86800003 -0.42199999
-7.40350199 -3.88226318 -0.16601130
-7.40324306 -3.88812757 -0.14500479
-7.40322208 -3.87859225 -0.17398170
-7.40300035 -3.97700024 0.02900000
-7.40278816 -3.92588782 -0.05199850
-7.40267181 -3.86682868 -0.41898140
-7.40226173 -3.92913914 -0.04700170
-7.40211487 -3.86729431 -0.22578050
-7.40209532 -3.88405013 -0.15500200
-7.40199995 -3.87800002 -0.47600001
-7.40199995 -3.88100004 -0.48600000
-7.40100002 -3.87500000 -0.18900000
-7.40100002 -3.86599994 -0.41700000
-7.40095043 -3.87765288 -0.17755030
-7.40086699 -3.92710090 -0.04995840
-7.40075636 -3.88039660 -0.16801719
-7.40032721 -3.88129139 -0.16444390
-7.39997292 -3.88169789 -0.16160730
-7.39900017 -3.86800003 -0.22000000
-7.39900017 -3.85899997 -0.28500000
-7.39900017 -3.85899997 -0.28799999
-7.39900017 -3.85899997 -0.29499999
-7.39900017 -3.87599993 -0.47299999
-7.39885950 -3.88292646 -0.15799700
-7.39882517 -3.87690830 -0.17899580
-7.39853811 -3.87328196 -0.19101390
-7.39833927 -3.87925124 -0.16914681
-7.39818716 -3.97710037 0.03100080
-7.39779854 -3.88019228 -0.16649300
-7.39747190 -3.87646604 -0.47555521
-7.39739847 -3.92321181 -0.05500300
-7.39713192 -3.92607045 -0.05000090
-7.39700794 -3.86700439 -0.22200020
-7.39699984 -3.87599993 -0.18099999
-7.39612913 -3.87206745 -0.19400340
-7.39599991 -3.97300029 0.02600000
-7.39591694 -3.88095665 -0.15999819
-7.39555788 -3.87987375 -0.16448250
-7.39499998 -3.92800021 -0.04500000
-7.39499283 -3.86599612 -0.22499980
-7.39495325 -3.87749982 -0.17302230
-7.39471292 -3.87693739 -0.17567611
-7.39400721 -3.87100387 -0.19600020
-7.39400005 -3.85599995 -0.31600001
-7.39400005 -3.85599995 -0.33700001
-7.39400005 -3.85599995 -0.34000000
-7.39399672 -3.85599852 -0.31899980
-7.39399004 -3.87318468 -0.18744840
-7.39396667 -3.87255120 -0.19032200
-7.39390182 -3.85594869 -0.32199571
-7.39324999 -3.85613060 -0.32701099
-7.39317799 -3.92277312 -0.05358240
-7.39300013 -3.86500001 -0.22700000
-7.39300013 -3.87599993 -0.47799999
-7.39295959 -3.87897873 -0.16299909
-7.39235353 -3.87187529 -0.19236770
-7.39204788 -3.92140675 -0.05683650
-7.39200068 -3.87000012 -0.19900000
-7.39146328 -3.85554314 -0.32091010
-7.39114571 -3.87532854 -0.47585240
-7.39110613 -3.95304513 -0.00062710
-7.39099979 -3.97399998 0.02900000
-7.39061832 -3.87768149 -0.16690481
-7.39050627 -3.85542417 -0.32558900
-7.39003992 -3.87202096 -0.18900099
-7.38999987 -3.87199998 -0.46399999
-7.38999319 -3.86899662 -0.20199980
-7.38987970 -3.87446141 -0.17902130
-7.38934469 -3.92518282 -0.04800220
-7.38900042 -3.85700011 -0.28500000
-7.38835716 -3.87543368 -0.17298999
-7.38818502 -3.85507774 -0.32794270
-7.38800764 -3.86800432 -0.20400020
-7.38800001 -3.96900010 0.02400000
-7.38800001 -3.87100005 -0.46200001
-7.38754368 -3.85482621 -0.33826861
-7.38714075 -3.92593479 -0.04587860
-7.38700199 -3.91800141 -0.06000000
-7.38691759 -3.87595701 -0.16799811
-7.38690710 -3.92095041 -0.05499930
-7.38666773 -3.87352395 -0.17919169
-7.38657856 -3.86882854 -0.19722760
-7.38626146 -3.85456657 -0.31969291
-7.38600063 -3.95300007 0.00100000
-7.38600063 -3.86700010 -0.20700000
-7.38515377 -3.87077427 -0.46375090
-7.38514233 -3.86907411 -0.19400370
-7.38500309 -3.85440612 -0.32242560
-7.38500023 -3.85400009 -0.35499999
-7.38436556 -3.85419083 -0.35201740
-7.38433504 -3.85417509 -0.29801351
-7.38429928 -3.87399650 -0.17487010
-7.38399982 -3.92200017 -0.05000000
-7.38399982 -3.85400009 -0.31600001
-7.38395882 -3.87097859 -0.18399900
-7.38390303 -3.87494922 -0.17099780
-7.38332891 -3.96840501 0.02490940
-7.38301229 -3.85400629 -0.32600051
-7.38299990 -3.86199999 -0.22499999
-7.38299990 -3.85400009 -0.32900000
-7.38299990 -3.85400009 -0.33700001
-7.38264704 -3.86781549 -0.19699059
-7.38213730 -3.91507244 -0.06300120
-7.38212729 -3.91714311 -0.05949580
-7.38200760 -3.91800427 -0.05700010
-7.38199997 -3.86500001 -0.21200000
-7.38199997 -3.87100005 -0.46700001
-7.38168240 -3.86679268 -0.20112281
-7.38155222 -3.85348320 -0.35393000
-7.38151073 -3.85343075 -0.29658660
-7.38149023 -3.87325692 -0.17301150
-7.38122511 -3.87011766 -0.18600570
-7.38116026 -3.96608567 0.02100050
-7.38101149 -3.86100578 -0.22700030
-7.37986851 -3.86693096 -0.19899650
-7.37957048 -3.85313272 -0.35204920
-7.37934446 -3.92318320 -0.04800220
-7.37904215 -3.87202191 -0.17600100
-7.37900019 -3.85999990 -0.23000000
-7.37900019 -3.86899996 -0.46399999
-7.37868881 -3.86883688 -0.18899199
-7.37765503 -3.87099791 -0.17999420
-7.37747860 -3.86525083 -0.20201311
-7.37741852 -3.85262108 -0.29532570
-7.37729979 -3.86215711 -0.21700880
-7.37686396 -3.91292810 -0.06499880
-7.37660217 -3.91578913 -0.05999680
-7.37646008 -3.86861181 -0.18748960
-7.37600136 -3.96279383 0.01866710
-7.37578106 -3.86788511 -0.19099431
-7.37553167 -3.96528554 0.02300170
-7.37500000 -3.86400008 -0.20400000
-7.37500000 -3.86100006 -0.21900000
-7.37445641 -3.85910344 -0.22993851
-7.37437820 -3.86940050 -0.18203451
-7.37400007 -3.85200000 -0.29499999
-7.37400007 -3.85200000 -0.30000001
-7.37400007 -3.85200000 -0.35499999
-7.37366867 -3.85182691 -0.35198420
-7.37366533 -3.86247420 -0.21049771
-7.37347412 -3.86136889 -0.21513230
-7.37317419 -3.86609149 -0.19400460
-7.37300014 -3.85999990 -0.22499999
-7.37300014 -3.86299992 -0.44499999
-7.37196779 -3.86798286 -0.18299919
-7.37195301 -3.90997481 -0.06799960
-7.37121248 -3.91311288 -0.06300180
-7.37101126 -3.85900593 -0.22700030
-7.37061262 -3.86179709 -0.44197670
-7.37026453 -3.86513901 -0.19600700
-7.36999989 -3.90300012 -0.08100000
-7.36999989 -3.86999989 -0.17299999
-7.36930323 -3.86715937 -0.18600769
-7.36900043 -3.86100054 -0.21200000
-7.36899996 -3.85800004 -0.23000000
-7.36899996 -3.85500002 -0.24500000
-7.36860704 -3.86607981 -0.18998630
-7.36834192 -3.86397219 -0.19725540
-7.36800003 -3.96199989 0.02100000
-7.36800003 -3.95799994 0.01600000
-7.36800003 -3.86899996 -0.17500000
-7.36787939 -3.86093712 -0.43899280
-7.36739159 -3.85420489 -0.24801320
-7.36704874 -3.90702629 -0.07000050
-7.36696148 -3.86597991 -0.18799900
-7.36678600 -3.86115098 -0.44516280
-7.36668777 -3.86470079 -0.19295950
-7.36647797 -3.85972619 -0.21498480
-7.36621237 -3.85311103 -0.25100720
-7.36613464 -3.91007161 -0.06500120
-7.36603642 -3.86201930 -0.20200101
-7.36552715 -3.90027928 -0.08400600
-7.36546946 -3.85924602 -0.43702790
-7.36492586 -3.86027670 -0.44274929
-7.36460209 -3.86479139 -0.19098970
-7.36416197 -3.85856128 -0.21697530
-7.36400032 -3.86100030 -0.20400000
-7.36399984 -3.85200000 -0.25500000
-7.36399984 -3.84899998 -0.28099999
-7.36382818 -3.86240172 -0.19807561
-7.36372423 -3.90847540 -0.06671910
-7.36308241 -3.85804319 -0.43400481
-7.36299992 -3.84899998 -0.28400001
-7.36239195 -3.86320543 -0.19401030
-7.36200762 -3.86000371 -0.20600019
-7.36199999 -4.00000000 0.07100000
-7.36199999 -3.85999990 -0.44700000
-7.36185122 -3.85832381 -0.43684149
-7.36147881 -3.84848571 -0.28103790
-7.36142969 -3.90564299 -0.07049750
-7.36119747 -3.95637512 0.01591260
-7.36113691 -3.90707278 -0.06800130
-7.36100006 -3.95799994 0.01800000
-7.36100006 -3.95399976 0.01300000
-7.36100006 -3.89800000 -0.08600000
-7.36078215 -3.85688591 -0.43098721
-7.36039877 -3.86031199 -0.20364469
-7.36013794 -3.86207247 -0.19600371
-7.36008263 -3.85904312 -0.20900230
-7.36000013 -4.00199986 0.07400000
-7.36000013 -3.90100002 -0.08100000
-7.35998440 -3.85220122 -0.25053740
-7.35992956 -3.85896277 -0.44399571
-7.35962772 -3.85280156 -0.24623621
-7.35901737 -3.85798693 -0.43934000
-7.35879040 -3.85566068 -0.42966160
-7.35862494 -3.85832810 -0.21101791
-7.35804605 -3.89882779 -0.08317700
-7.35799551 -3.86099792 -0.19899990
-7.35792494 -3.85748482 -0.21402690
-7.35772419 -3.85785556 -0.44198340
-7.35760641 -3.85868573 -0.20705719
-7.35725784 -3.90213704 -0.07600270
-7.35677624 -3.85440683 -0.42604491
-7.35652065 -3.85174918 -0.24998370
-7.35621691 -3.99831319 0.07081900
-7.35599995 -3.85400009 -0.23000000
-7.35587263 -3.85993290 -0.20099650
-7.35586500 -3.90492821 -0.06999870
-7.35553503 -3.89828372 -0.08300600
-7.35534286 -3.85717988 -0.43902051
-7.35503769 -3.85401988 -0.42300221
-7.35485840 -3.85092616 -0.25299510
-7.35414028 -3.84707332 -0.27900529
-7.35400009 -3.99600029 0.06800000
-7.35400009 -3.95399976 0.01500000
-7.35388279 -3.85293889 -0.41999331
-7.35359716 -3.85878849 -0.20398881
-7.35344124 -3.85556102 -0.43386149
-7.35321951 -3.85630965 -0.21340770
-7.35300016 -3.84999990 -0.25500000
-7.35300016 -3.84699988 -0.28400001
-7.35269117 -3.89983606 -0.07799670
-7.35263824 -3.85181022 -0.41797939
-7.35242796 -3.85370564 -0.42786190
-7.35140371 -3.85721183 -0.20601130
-7.35099983 -3.99699998 0.07100000
-7.35099983 -3.89599991 -0.08600000
-7.35099983 -3.85400009 -0.22200000
-7.35095453 -3.90197587 -0.07299950
-7.35090876 -3.85095239 -0.41499481
-7.35080719 -3.85592628 -0.21179700
-7.34999990 -3.84800005 -0.26300001
-7.34980202 -3.89824772 -0.07955900
-7.34912825 -3.85606742 -0.20900370
-7.34900522 -3.85000277 -0.41200030
-7.34899998 -3.88599992 -0.10900000
-7.34899998 -3.84999990 -0.23999999
-7.34899998 -3.84699988 -0.26600000
-7.34899998 -3.84400010 -0.29899999
-7.34873533 -3.90043902 -0.07476060
-7.34861803 -3.85332394 -0.22401880
-7.34800005 -3.84400010 -0.30199999
-7.34800005 -3.84699988 -0.38800001
-7.34781551 -3.85069823 -0.41695809
-7.34773064 -3.85285878 -0.42798430
-7.34715080 -3.84607863 -0.38500789
-7.34714746 -3.84907722 -0.40900820
-7.34706926 -3.85203600 -0.22700210
-7.34703398 -3.85501766 -0.21100099
-7.34701157 -3.84900594 -0.24200040
-7.34700012 -3.99799967 0.07300000
-7.34700012 -3.94700003 0.00800000
-7.34700012 -3.84299994 -0.31700000
-7.34646702 -3.85168791 -0.42263061
-7.34613085 -3.89906907 -0.07600130
-7.34547043 -3.84824657 -0.40702611
-7.34508801 -3.92804718 -0.02000020
-7.34499979 -4.00000000 0.07600000
-7.34499979 -3.88400006 -0.11100000
-7.34499979 -3.84800005 -0.24500000
-7.34499979 -3.84499979 -0.38000000
-7.34496689 -3.85398245 -0.21399900
-7.34487486 -3.85226250 -0.22436240
-7.34462261 -3.84480238 -0.27598581
-7.34424925 -3.85113049 -0.23200791
-7.34414673 -3.84594941 -0.26318541
-7.34414434 -3.84996939 -0.41776669
-7.34409809 -3.84452796 -0.27896571
-7.34399652 -3.84799814 -0.40399981
-7.34365034 -3.89481473 -0.08299600
-7.34310579 -3.84705544 -0.40100580
-7.34309244 -3.85236883 -0.22034730
-7.34299994 -3.84400010 -0.28400001
-7.34299994 -3.84400010 -0.37200001
-7.34299994 -3.84400010 -0.37500000
-7.34279585 -3.94613481 0.00874900
-7.34238338 -3.89586687 -0.07993560
-7.34233332 -3.85017467 -0.42001909
-7.34200001 -3.87299991 -0.13699999
-7.34200001 -3.84999990 -0.23400000
-7.34183741 -3.85042262 -0.23013310
-7.34163904 -3.94463110 0.00680730
-7.34100008 -3.98499990 0.06100000
-7.34100008 -3.92899990 -0.01800000
-7.34100008 -3.84299994 -0.28900000
-7.34097195 -3.84820509 -0.41483101
-7.34091377 -3.84595442 -0.39599529
-7.34057570 -3.84347296 -0.28624949
-7.34022570 -3.94312143 0.00500020
-7.34000015 -3.94600010 0.01000000
-7.34000015 -3.84800005 -0.23700000
-7.33994627 -3.99713135 0.07424320
-7.33992720 -3.84699821 -0.40411299
-7.33989000 -3.84494233 -0.39299411
-7.33970451 -3.84484482 -0.25798959
-7.33967924 -3.99510431 0.07194030
-7.33936262 -3.84665537 -0.40927649
-7.33936071 -3.84423876 -0.38232070
-7.33930826 -3.98825431 0.06301980
-7.33925962 -3.92513871 -0.02300080
-7.33909082 -3.89204788 -0.08600110
-7.33902979 -3.84753990 -0.24003370
-7.33900023 -3.88700008 -0.09900000
-7.33900023 -3.84200001 -0.29400000
-7.33900023 -3.84200001 -0.29699999
-7.33895779 -3.85029149 -0.22589099
-7.33850813 -3.84566617 -0.39841759
-7.33842802 -3.85122466 -0.22201291
-7.33835983 -3.84650159 -0.40638939
-7.33813620 -3.98355579 0.06012520
-7.33811092 -3.84505820 -0.39100590
-7.33799982 -3.99299979 0.07000000
-7.33795881 -3.84317350 -0.27530199
-7.33770800 -3.84679818 -0.41387069
-7.33735752 -3.84366345 -0.26297700
-7.33725262 -3.89286995 -0.08340260
-7.33719063 -3.84762430 -0.24203929
-7.33706141 -3.84568119 -0.40074480
-7.33704472 -3.89402366 -0.08100050
-7.33699989 -3.84100008 -0.34599999
-7.33699989 -3.84100008 -0.35100001
-7.33699989 -3.84400010 -0.38800001
-7.33694935 -3.84253669 -0.28331211
-7.33684969 -3.92636752 -0.02014660
-7.33635426 -3.85018587 -0.22401080
-7.33599997 -3.99499989 0.07300000
-7.33599997 -3.88499999 -0.10100000
-7.33599997 -3.84400010 -0.38499999
-7.33585882 -3.84227991 -0.37266901
-7.33575106 -3.84639359 -0.24502510
-7.33533192 -3.87305903 -0.13405021
-7.33500862 -3.84000421 -0.33000040
-7.33500004 -3.83999991 -0.32499999
-7.33500004 -3.83999991 -0.33500001
-7.33490467 -3.94228005 0.00615480
-7.33481264 -3.84890175 -0.22699420
-7.33472347 -3.84273672 -0.37856239
-7.33457375 -3.84525204 -0.40892050
-7.33455420 -3.84097385 -0.29593810
-7.33425856 -3.89013720 -0.08800310
-7.33405685 -3.84647441 -0.23827130
-7.33403921 -3.84405208 -0.39261001
-7.33400011 -3.84200001 -0.27300000
-7.33398151 -3.84551454 -0.24703310
-7.33382511 -3.84590864 -0.40599030
-7.33374023 -3.92186141 -0.02599910
-7.33332634 -3.84217072 -0.27601230
-7.33320665 -3.94011092 0.00300010
-7.33313227 -3.84806967 -0.22900410
-7.33312511 -3.84309292 -0.26263309
-7.33300591 -3.98522377 0.06201890
-7.33269644 -3.89183879 -0.08299660
-7.33256912 -3.83970356 -0.34694529
-7.33238316 -3.89086318 -0.08591190
-7.33234262 -3.84117961 -0.37501749
-7.33225393 -3.84323955 -0.25940740
-7.33218575 -3.84613562 -0.24199100
-7.33213711 -3.84407210 -0.40100750
-7.33199978 -3.98699999 0.06600000
-7.33199978 -3.87400031 -0.12700000
-7.33199978 -3.87100005 -0.13699999
-7.33199978 -3.86800003 -0.14500000
-7.33199978 -3.84400010 -0.25000000
-7.33148193 -3.98334861 0.06002030
-7.33138418 -3.84120154 -0.37201950
-7.33121300 -3.84010935 -0.29278260
-7.33106470 -3.83890224 -0.32544461
-7.33099985 -3.86100006 -0.16500001
-7.33099985 -3.84100008 -0.28099999
-7.33092308 -3.84396005 -0.39799589
-7.33082533 -3.84090900 -0.36899120
-7.33079243 -3.88850951 -0.08896890
-7.32999992 -3.92299986 -0.02300000
-7.32999992 -3.84599996 -0.23400000
-7.32980442 -3.84089780 -0.28399241
-7.32977200 -3.84201622 -0.26487610
-7.32942867 -3.84364319 -0.24872720
-7.32931137 -3.83861947 -0.33271059
-7.32929802 -3.98105860 0.05851360
-7.32914305 -3.86607528 -0.14700291
-7.32900000 -3.84299994 -0.25500000
-7.32896185 -3.84248519 -0.39029661
-7.32879210 -3.87188983 -0.12899630
-7.32853937 -3.83860660 -0.34545410
-7.32851124 -3.84274364 -0.39297381
-7.32839012 -3.84520459 -0.23701259
-7.32834053 -3.86017919 -0.16800781
-7.32833719 -3.83917642 -0.36401671
-7.32791471 -3.91895413 -0.02799970
-7.32789850 -3.93781018 0.00193220
-7.32786942 -3.83802843 -0.33065581
-7.32758379 -3.84230590 -0.26002070
-7.32749844 -3.98234463 0.06058360
-7.32747030 -3.93971515 0.00499960
-7.32724667 -3.98424840 0.06410630
-7.32700014 -3.93600011 0.00000000
-7.32700014 -3.88299990 -0.10100000
-7.32700014 -3.88000011 -0.10700000
-7.32700014 -3.83899999 -0.29100001
-7.32691813 -3.83904243 -0.36648309
-7.32670403 -3.84136891 -0.26302531
-7.32661867 -3.83932376 -0.36103049
-7.32661104 -3.84479570 -0.23898730
-7.32604313 -3.88502264 -0.09400050
-7.32600021 -3.85899997 -0.17000000
-7.32600021 -3.83899999 -0.29400000
-7.32600021 -3.83800006 -0.29899999
-7.32596779 -3.83798289 -0.35599840
-7.32594013 -3.84376311 -0.40926930
-7.32585716 -3.86492467 -0.14999710
-7.32562304 -3.85962582 -0.16751020
-7.32551098 -3.83735466 -0.32479230
-7.32539845 -3.87021065 -0.13200720
-7.32539654 -3.83820796 -0.35101900
-7.32536793 -3.84158468 -0.25808460
-7.32534647 -3.83765769 -0.34796891
-7.32508516 -3.83953595 -0.37405249
-7.32499981 -3.83999991 -0.38699999
-7.32495451 -3.84397650 -0.24199849
-7.32479668 -3.83789349 -0.34299040
-7.32465506 -3.91981602 -0.02499880
-7.32414055 -3.88707471 -0.08800170
-7.32401371 -3.84053159 -0.26803711
-7.32399988 -3.94300008 0.01300000
-7.32399988 -3.83699989 -0.31200001
-7.32383442 -3.83691359 -0.32999259
-7.32377958 -3.83688450 -0.31699049
-7.32377481 -3.83688211 -0.32698989
-7.32375622 -3.83687234 -0.32198930
-7.32374334 -3.83686543 -0.33798820
-7.32366037 -3.83734584 -0.33302999
-7.32353020 -3.98228836 0.06300460
-7.32333660 -3.84317660 -0.24501130
-7.32315922 -3.97871566 0.05702460
-7.32310390 -3.84305429 -0.40800580
-7.32305527 -3.88597083 -0.09007960
-7.32300425 -3.87800217 -0.10900010
-7.32299995 -3.92200017 -0.02000000
-7.32299995 -3.86299992 -0.15200000
-7.32281923 -3.84050870 -0.26473919
-7.32254457 -3.83928561 -0.27002010
-7.32247496 -3.98038220 0.05994220
-7.32237959 -3.83689928 -0.34850201
-7.32208586 -3.91604614 -0.03100040
-7.32207584 -3.83701420 -0.29850030
-7.32200289 -3.88300157 -0.09600000
-7.32200003 -3.87199998 -0.12700000
-7.32200003 -3.86599994 -0.14500000
-7.32200003 -3.84200001 -0.24699999
-7.32200003 -3.83899999 -0.38200000
-7.32194471 -3.86897087 -0.13499901
-7.32147408 -3.84115267 -0.25499699
-7.32123899 -3.83619237 -0.34082150
-7.32116413 -3.83908582 -0.27300611
-7.32100010 -3.93600011 0.00200000
-7.32099819 -3.83899903 -0.37899989
-7.32053328 -3.84033251 -0.25833669
-7.32040882 -3.92128849 -0.02032180
-7.32038116 -3.83649564 -0.35461801
-7.32015753 -3.83739614 -0.36670440
-7.32008648 -3.83601379 -0.32970339
-7.32004595 -3.83775830 -0.27528059
-7.32000017 -3.98299980 0.06500000
-7.32000017 -3.85899997 -0.16500001
-7.31991386 -3.83795452 -0.27799669
-7.31978416 -3.88488555 -0.09099730
-7.31978035 -3.83967805 -0.26555380
-7.31975269 -3.83996701 -0.26114079
-7.31953526 -3.86975384 -0.12899180
-7.31935692 -3.83818746 -0.37401831
-7.31922960 -3.86412168 -0.14700460
-7.31916142 -3.83827257 -0.38152450
-7.31915617 -3.83586884 -0.31705481
-7.31900311 -3.86700225 -0.13700010
-7.31899977 -3.83999991 -0.25200000
-7.31899786 -3.87599874 -0.11200000
-7.31891298 -3.91695428 -0.02799970
-7.31887627 -3.83693528 -0.36899379
-7.31885672 -3.85785127 -0.16890509
-7.31880760 -3.83789945 -0.28099260
-7.31854916 -3.83822322 -0.27101371
-7.31799984 -3.98499990 0.06800000
-7.31799984 -3.94000030 0.01000000
-7.31799984 -3.84299994 -0.23400000
-7.31799793 -3.88099909 -0.09900000
-7.31797457 -3.83599639 -0.35178220
-7.31769037 -3.87793756 -0.10650980
-7.31758976 -3.83678460 -0.36397961
-7.31749678 -3.83529282 -0.33791101
-7.31743956 -3.83533335 -0.32718861
-7.31726313 -3.83613801 -0.28601030
-7.31720209 -3.84010601 -0.25500700
-7.31712580 -3.83609414 -0.35973790
-7.31699991 -3.91899991 -0.02300000
-7.31684017 -3.83876634 -0.26648161
-7.31662416 -3.86789775 -0.13376850
-7.31634665 -3.91318560 -0.03300160
-7.31633234 -3.83714080 -0.27911231
-7.31628180 -3.98332572 0.06666320
-7.31620455 -3.86310840 -0.15000419
-7.31617880 -3.86509490 -0.14000340
-7.31609583 -3.84205031 -0.23600310
-7.31599998 -3.85700011 -0.17000000
-7.31580257 -3.83493042 -0.31936419
-7.31568289 -3.83583331 -0.29098740
-7.31563425 -3.98162007 0.06486860
-7.31546497 -3.83692622 -0.27365839
-7.31521797 -3.88311577 -0.09300280
-7.31514978 -3.83444810 -0.34053519
-7.31508970 -3.87404776 -0.11400140
-7.31500006 -3.97799993 0.06000000
-7.31499195 -3.83499599 -0.35599959
-7.31495523 -3.83497691 -0.29599819
-7.31493759 -3.83476210 -0.31375140
-7.31490326 -3.83894920 -0.25999659
-7.31466198 -3.83487177 -0.33762050
-7.31459618 -3.83478808 -0.29898351
-7.31433964 -3.84117866 -0.23901109
-7.31400299 -3.87900138 -0.10100000
-7.31400013 -3.94099998 0.01200000
-7.31400013 -3.86100006 -0.15200000
-7.31376934 -3.83487892 -0.35298890
-7.31375790 -3.83418918 -0.33473140
-7.31365252 -3.87581539 -0.10899480
-7.31356478 -3.88195753 -0.09485190
-7.31351519 -3.86679935 -0.13485210
-7.31350946 -3.83426714 -0.30402109
-7.31343508 -3.83536410 -0.28925529
-7.31332350 -3.83432484 -0.32541460
-7.31300163 -3.91400051 -0.03000000
-7.31300020 -3.92899990 -0.00500000
-7.31300020 -3.92000008 -0.02000000
-7.31300020 -3.86400008 -0.14200000
-7.31300020 -3.83999991 -0.24100000
-7.31288099 -3.83446193 -0.35004219
-7.31286383 -3.83792853 -0.26499501
-7.31282330 -3.83455467 -0.29322019
-7.31275463 -3.83387160 -0.30898961
-7.31273985 -3.91828918 -0.02276470
-7.31266499 -3.83382440 -0.34498420
-7.31240368 -3.83368731 -0.33997229
-7.31231499 -3.83416510 -0.33201429
-7.31214666 -3.83407712 -0.31400630
-7.31199980 -3.97900033 0.06200000
-7.31199980 -3.97300029 0.05500000
-7.31199980 -3.83699989 -0.38400000
-7.31199884 -3.83399963 -0.31900001
-7.31199217 -3.83399630 -0.32199970
-7.31198931 -3.83418584 -0.29764569
-7.31198788 -3.83699346 -0.26799950
-7.31189442 -3.87994719 -0.09800110
-7.31157637 -3.87800550 -0.10214760
-7.31134462 -3.87218261 -0.11700550
-7.31108570 -3.91004562 -0.03600040
-7.31099987 -3.83899999 -0.24699999
-7.31061411 -3.83367038 -0.31629229
-7.30999994 -3.98000002 0.06500000
-7.30999994 -3.83599997 -0.37900001
-7.30995607 -3.86497688 -0.13699920
-7.30992222 -3.83595896 -0.27199709
-7.30990982 -3.87395239 -0.11199860
-7.30986500 -3.87692881 -0.10399810
-7.30969286 -3.83440781 -0.28699380
-7.30929518 -3.97264314 0.05623800
-7.30909204 -3.83504820 -0.27500340
-7.30900002 -3.83800006 -0.24900000
-7.30863714 -3.83294392 -0.30563581
-7.30832148 -3.91081166 -0.03393480
-7.30800343 -3.87000179 -0.11900010
-7.30800009 -3.92899990 -0.00300000
-7.30800009 -3.84100008 -0.23400000
-7.30789900 -3.83494711 -0.27799621
-7.30775309 -3.83339667 -0.29247421
-7.30756903 -3.83433223 -0.28243729
-7.30744457 -3.97062445 0.05392400
-7.30735064 -3.83274055 -0.31189719
-7.30724239 -3.92697668 -0.00602180
-7.30700016 -3.91700029 -0.02300000
-7.30687475 -3.87793350 -0.09899830
-7.30684185 -3.86291599 -0.13899700
-7.30666113 -3.83982182 -0.23598900
-7.30630589 -3.87653351 -0.10272110
-7.30622435 -3.90799165 -0.03710360
-7.30608988 -3.87204766 -0.11400140
-7.30600023 -3.85400009 -0.16800000
-7.30574274 -3.83272362 -0.29501900
-7.30560493 -3.87479043 -0.10599430
-7.30537844 -3.83220410 -0.31003791
-7.30523157 -3.83312130 -0.28500900
-7.30495644 -3.97018623 0.05444900
-7.30490494 -3.83894992 -0.23899689
-7.30482197 -3.83770442 -0.24708900
-7.30456352 -3.86776900 -0.12199270
-7.30425453 -3.83313346 -0.28801000
-7.30417967 -3.83193898 -0.34357449
-7.30400085 -3.90876460 -0.03577410
-7.30399990 -3.97399998 0.06000000
-7.30399990 -3.88800001 -0.07400000
-7.30384350 -3.96791530 0.05199890
-7.30339813 -3.83220935 -0.29301599
-7.30303526 -3.83201861 -0.29600149
-7.30299997 -3.85200000 -0.17000000
-7.30299997 -3.83800006 -0.24100000
-7.30243731 -3.83207059 -0.30099079
-7.30239534 -3.87620974 -0.10100550
-7.30225801 -3.87013650 -0.11700410
-7.30212021 -3.83144689 -0.34067219
-7.30200100 -3.92600012 -0.00500000
-7.30200005 -3.89599991 -0.05600000
-7.30151701 -3.92392373 -0.00864980
-7.30142117 -3.86772919 -0.12095450
-7.30139589 -3.87220979 -0.10900590
-7.30112553 -3.83106613 -0.30600530
-7.30100012 -3.97600007 0.06200000
-7.30099869 -3.90799952 -0.03600000
-7.30075836 -3.83087349 -0.31098971
-7.30074358 -3.86586380 -0.12399560
-7.30044413 -3.83123279 -0.34702110
-7.30038452 -3.83120155 -0.31401649
-7.30000019 -3.83699989 -0.24600001
-7.29999876 -3.83099937 -0.34200001
-7.29995584 -3.83097672 -0.33899790
-7.29989052 -3.92467856 -0.00663720
-7.29969120 -3.97386312 0.06044560
-7.29965734 -3.96881390 0.05499740
-7.29942846 -3.87277961 -0.10671630
-7.29899979 -3.91499972 -0.02100000
-7.29899979 -3.83599997 -0.24900000
-7.29899979 -3.83299971 -0.26899999
-7.29887962 -3.88546848 -0.07600920
-7.29874277 -3.86786389 -0.11899580
-7.29857159 -3.96641731 0.05152570
-7.29834414 -3.87418318 -0.10400490
-7.29816532 -3.83308697 -0.27200621
-7.29813766 -3.89547944 -0.05546340
-7.29799986 -3.83200002 -0.27500001
-7.29713583 -3.87007213 -0.11100210
-7.29699993 -3.84899998 -0.17500000
-7.29660511 -3.86432028 -0.12701049
-7.29632568 -3.85165095 -0.16844781
-7.29601479 -3.92252254 -0.00870710
-7.29600000 -3.97000003 0.05700000
-7.29598761 -3.91627049 -0.01814270
-7.29545879 -3.92060065 -0.01128550
-7.29527569 -3.91476011 -0.02031310
-7.29500008 -3.96399999 0.04900000
-7.29500008 -3.90700030 -0.03300000
-7.29500008 -3.90499997 -0.03800000
-7.29500008 -3.90100002 -0.04300000
-7.29491091 -3.86595273 -0.12199850
-7.29486895 -3.88371062 -0.07794010
-7.29474306 -3.87186360 -0.10599630
-7.29462290 -3.88545799 -0.07474880
-7.29420853 -3.84811020 -0.17800510
-7.29317856 -3.86209464 -0.12900320
-7.29308414 -3.86804485 -0.11400130
-7.29300022 -3.97099972 0.05900000
-7.29300022 -3.89400005 -0.05600000
-7.29300022 -3.82999969 -0.37000000
-7.29199982 -3.84999990 -0.17000000
-7.29199982 -3.82900000 -0.36500001
-7.29169321 -3.84683847 -0.17999239
-7.29140854 -3.89950204 -0.04425990
-7.29139137 -3.86357093 -0.12525420
-7.29121113 -3.88335800 -0.07657940
-7.29099989 -3.96499968 0.05200000
-7.29091120 -3.86995268 -0.10899870
-7.28999996 -3.88100004 -0.08100000
-7.28999996 -3.87199998 -0.10100000
-7.28999996 -3.85999990 -0.13200000
-7.28999996 -3.85200000 -0.16000000
-7.28977537 -3.91987896 -0.01099970
-7.28966427 -3.91687441 -0.01456920
-7.28958559 -3.83062530 -0.27455971
-7.28939199 -3.84520674 -0.18300980
-7.28935003 -3.86618567 -0.11600560
-7.28908539 -3.90404606 -0.03600040
-7.28900003 -3.89800000 -0.04600000
-7.28900003 -3.83100009 -0.26899999
-7.28877831 -3.90575981 -0.03315620
-7.28812218 -3.83053851 -0.27196729
-7.28800821 -3.82700396 -0.31300029
-7.28800011 -3.91300011 -0.02100000
-7.28800011 -3.82699990 -0.30800000
-7.28800011 -3.82699990 -0.31799999
-7.28798151 -3.91805458 -0.01215260
-7.28745842 -3.84658575 -0.17659740
-7.28734541 -3.89912009 -0.04364430
-7.28708982 -3.86804771 -0.11100140
-7.28708410 -3.86204481 -0.12700149
-7.28700018 -3.84999990 -0.16200000
-7.28700018 -3.84400010 -0.18500000
-7.28700018 -3.82999969 -0.27500001
-7.28628111 -3.87055802 -0.10270410
-7.28599739 -3.86399889 -0.11900000
-7.28546000 -3.86016631 -0.12984270
-7.28487587 -3.84593487 -0.17699701
-7.28476906 -3.82631612 -0.31524521
-7.28469753 -3.88083887 -0.07899670
-7.28399992 -3.90499997 -0.03300000
-7.28399992 -3.89899993 -0.04300000
-7.28383493 -3.91591120 -0.01299970
-7.28334665 -3.90118599 -0.03800180
-7.28334522 -3.91318607 -0.01800090
-7.28334427 -3.86618280 -0.11400540
-7.28299999 -3.82800007 -0.37000000
-7.28299999 -3.82999969 -0.40200001
-7.28260231 -3.84478998 -0.17999020
-7.28230762 -3.90281916 -0.03574620
-7.28200006 -3.86800003 -0.10600000
-7.28200006 -3.82699990 -0.36500001
-7.28153038 -3.82927871 -0.39902899
-7.28134251 -3.98318744 0.07700360
-7.28100014 -3.98600006 0.08000000
-7.28100014 -3.84999990 -0.16000000
-7.28038979 -3.84320569 -0.18300980
-7.28018570 -3.86127138 -0.12175330
-7.28010941 -3.86308980 -0.11803570
-7.28000021 -3.89599991 -0.04600000
-7.28000021 -3.85800004 -0.13200000
-7.28000021 -3.84599996 -0.17000000
-7.28000021 -3.82900000 -0.39600000
-7.27931166 -3.86016536 -0.12400530
-7.27899981 -3.96100020 0.05200000
-7.27899981 -3.95500016 0.04400000
-7.27899981 -3.89299989 -0.05100000
-7.27899981 -3.86999989 -0.10200000
-7.27899981 -3.82500005 -0.30800000
-7.27899885 -3.90199947 -0.03600000
-7.27808619 -3.91004610 -0.02100020
-7.27808523 -3.89804578 -0.04100050
-7.27800035 -3.82500029 -0.31299999
-7.27799988 -3.84800005 -0.16200000
-7.27799988 -3.84200001 -0.18500000
-7.27763748 -3.82480955 -0.31598431
-7.27735043 -3.98095131 0.07577640
-7.27729845 -3.91316080 -0.01600070
-7.27710581 -3.86754179 -0.10566610
-7.27699995 -3.91499972 -0.01100000
-7.27699995 -3.84499979 -0.17299999
-7.27674294 -3.86186361 -0.11899580
-7.27600002 -3.95600033 0.04700000
-7.27568483 -3.85883260 -0.12699451
-7.27539301 -3.89857030 -0.03916130
-7.27482796 -3.90971088 -0.01942860
-7.27459812 -3.95934987 0.05128100
-7.27399778 -3.88999891 -0.05400000
-7.27391291 -3.97917724 0.07484900
-7.27299976 -3.82800007 -0.40099999
-7.27282858 -3.90690804 -0.02299950
-7.27264071 -3.86080933 -0.12099400
-7.27213097 -3.85706949 -0.12900230
-7.27200031 -3.98100019 0.07700000
-7.27199984 -3.95099998 0.04100000
-7.27199984 -3.86599994 -0.10700000
-7.27199984 -3.84200001 -0.17800000
-7.27198887 -3.95928979 0.05163150
-7.27183580 -3.82791400 -0.39799100
-7.27157784 -3.90931034 -0.01800140
-7.27134514 -3.91218591 -0.01300060
-7.27101135 -3.95246410 0.04348790
-7.27099991 -3.95600033 0.04900000
-7.26999998 -3.84400010 -0.17000000
-7.26999998 -3.82299995 -0.28700000
-7.26968479 -3.88922596 -0.05386560
-7.26933384 -3.82317591 -0.29001331
-7.26921654 -3.84111452 -0.18000540
-7.26908970 -3.85804749 -0.12400150
-7.26900005 -3.95799994 0.05100000
-7.26900005 -3.89100003 -0.05100000
-7.26900005 -3.88700008 -0.05600000
-7.26882362 -3.85490680 -0.13199680
-7.26865387 -3.89581442 -0.04099800
-7.26860285 -3.97823620 0.07495940
-7.26800013 -3.95199990 0.04400000
-7.26736689 -3.82819343 -0.41402090
-7.26726341 -3.90360475 -0.02599740
-7.26713371 -3.83907032 -0.18300340
-7.26700020 -3.91300011 -0.01100000
-7.26700020 -3.84299994 -0.17200001
-7.26700020 -3.82200003 -0.30000001
-7.26644135 -3.82248998 -0.28928730
-7.26622438 -3.82111812 -0.30500939
-7.26599979 -3.90899968 -0.01600000
-7.26594830 -3.82097268 -0.30799779
-7.26580095 -3.90563869 -0.02245940
-7.26554060 -3.85550666 -0.12819280
-7.26525354 -3.82113338 -0.31301090
-7.26522303 -3.85311818 -0.13400410
-7.26499987 -3.94700003 0.03900000
-7.26490545 -3.82095051 -0.31799579
-7.26479006 -3.83788943 -0.18499470
-7.26399994 -3.82100010 -0.32300001
-7.26399755 -3.88799882 -0.05400000
-7.26388550 -3.82113481 -0.30359659
-7.26300001 -3.89299989 -0.04300000
-7.26230574 -3.94596529 0.03850510
-7.26225424 -3.83713412 -0.18800659
-7.26205492 -3.83782911 -0.18356051
-7.26203012 -3.82155013 -0.28754899
-7.26200008 -3.83999991 -0.17700000
-7.26196194 -3.85097980 -0.13699929
-7.26195526 -3.90983653 -0.01363260
-7.26113939 -3.90225601 -0.02555650
-7.26108408 -3.85404468 -0.12900150
-7.26077652 -3.90088010 -0.02799910
-7.26058674 -3.85147667 -0.13487791
-7.26000023 -3.83599997 -0.19000000
-7.25976944 -3.83887792 -0.17999430
-7.25917101 -3.94474149 0.03789600
-7.25899982 -3.88499999 -0.05600000
-7.25899982 -3.88199997 -0.06100000
-7.25899982 -3.82100010 -0.28700000
-7.25899982 -3.82100010 -0.29200000
-7.25899982 -3.82699990 -0.41600001
-7.25812578 -3.85006690 -0.13900240
-7.25739622 -3.85221028 -0.13100719
-7.25732708 -3.82617259 -0.41401869
-7.25699997 -3.94300008 0.03600000
-7.25699997 -3.81999993 -0.30000001
-7.25654078 -3.85105610 -0.13320090
-7.25639105 -3.81920552 -0.30501640
-7.25599957 -3.82500005 -0.41100001
-7.25591373 -3.81895471 -0.30999631
-7.25572824 -3.81885719 -0.31298831
-7.25521564 -3.83611369 -0.18500550
-7.25508404 -3.84804440 -0.14200160
-7.25507975 -3.81904197 -0.31800351
-7.25500011 -3.90700030 -0.01600000
-7.25500011 -3.87100005 -0.08100000
-7.25500011 -3.81900001 -0.32300001
-7.25500011 -3.82100010 -0.38800001
-7.25478601 -3.89986944 -0.02680290
-7.25457048 -3.89730644 -0.03100240
-7.25407743 -3.85004091 -0.13400140
-7.25400019 -3.88000011 -0.06400000
-7.25400019 -3.83200002 -0.19800000
-7.25400019 -3.81800008 -0.32800001
-7.25394964 -3.94151545 0.03493590
-7.25377131 -3.94303823 0.03754290
-7.25299978 -3.82299995 -0.40599999
-7.25274611 -3.83486629 -0.18699349
-7.25214195 -3.84607530 -0.14400280
-7.25168657 -3.94337296 0.03900370
-7.25147486 -3.82272363 -0.40297091
-7.25113821 -3.83144021 -0.19793840
-7.25099993 -3.81900001 -0.27700001
-7.25099611 -3.86899805 -0.08400000
-7.25005674 -3.84775591 -0.13754641
-7.25000000 -3.88000011 -0.06100000
-7.25000000 -3.86299992 -0.09900000
-7.25000000 -3.83400011 -0.19000000
-7.24996901 -3.82198381 -0.39999831
-7.24971485 -3.83037758 -0.45004430
-7.24954462 -3.81828690 -0.27902099
-7.24953175 -3.89603543 -0.03077540
-7.24933004 -3.94115090 0.03676420
-7.24900007 -3.93899989 0.03300000
-7.24890518 -3.84494948 -0.14699811
-7.24860907 -3.89432740 -0.03400290
-7.24833298 -3.82117558 -0.39801830
-7.24800014 -3.81800008 -0.28200001
-7.24800014 -3.82900000 -0.44800001
-7.24752474 -3.84529877 -0.14277101
-7.24741125 -3.86863208 -0.08312350
-7.24700022 -3.94300008 0.04100000
-7.24700022 -3.86700010 -0.08600000
-7.24700022 -3.81999993 -0.39500001
-7.24609566 -3.84305096 -0.14900200
-7.24599981 -3.86100006 -0.10200000
-7.24585056 -3.89475179 -0.03107350
-7.24499989 -3.87800002 -0.06400000
-7.24499989 -3.87400031 -0.06900000
-7.24499989 -3.86899996 -0.08100000
-7.24499989 -3.81900001 -0.38699999
-7.24423599 -3.89311051 -0.03395300
-7.24400711 -3.84494233 -0.14096120
-7.24399948 -3.94499993 0.04400000
-7.24399948 -3.93899989 0.03600000
-7.24399948 -3.81599998 -0.32499999
-7.24399948 -3.81599998 -0.32800001
-7.24397278 -3.81767130 -0.27656820
-7.24348497 -3.89126086 -0.03600240
-7.24300003 -3.90599990 -0.01100000
-7.24300003 -3.82999969 -0.19700000
-7.24300003 -3.82100010 -0.24300000
-7.24300003 -3.82100010 -0.40599999
-7.24286270 -3.94203138 0.04082370
-7.24285889 -3.84192514 -0.15199700
-7.24282837 -3.89390779 -0.03099930
-7.24265051 -3.82814503 -0.44849879
-7.24259090 -3.84378290 -0.14399190
-7.24200010 -3.82900000 -0.45199999
-7.24173594 -3.82086039 -0.40298530
-7.24133587 -3.82017732 -0.24601141
-7.24100018 -3.93400025 0.03100000
-7.24100018 -3.82900000 -0.20000000
-7.24099636 -3.86699820 -0.08400000
-7.24070883 -3.81984639 -0.39998391
-7.24033594 -3.89014935 -0.03657790
-7.24000406 -3.84000230 -0.15400010
-7.23999977 -3.87199998 -0.07100000
-7.23999977 -3.81900001 -0.24800000
-7.23999977 -3.81699991 -0.27599999
-7.23985720 -3.84292436 -0.14699709
-7.23963213 -3.82780600 -0.44997719
-7.23924637 -3.81912994 -0.39801359
-7.23917007 -3.81608963 -0.27900651
-7.23899984 -3.93899989 0.03800000
-7.23899984 -3.82500005 -0.21500000
-7.23860168 -3.88878608 -0.03899790
-7.23799992 -3.86199999 -0.09200000
-7.23799992 -3.83299971 -0.17700000
-7.23799992 -3.81800008 -0.39500001
-7.23749495 -3.84473181 -0.13899030
-7.23726702 -3.83814192 -0.15700580
-7.23724890 -3.89004159 -0.03530380
-7.23700857 -3.90450215 -0.01129960
-7.23699999 -3.94099998 0.04100000
-7.23699999 -3.90300012 -0.01400000
-7.23699999 -3.86500001 -0.08600000
-7.23699999 -3.81800008 -0.25299999
-7.23694658 -3.82397151 -0.21799840
-7.23691750 -3.84095645 -0.14899831
-7.23600006 -3.93499994 0.03400000
-7.23600006 -3.87299991 -0.06900000
-7.23600006 -3.81699991 -0.25600001
-7.23511600 -3.83206177 -0.18000290
-7.23500013 -3.93099999 0.02800000
-7.23500013 -3.85100007 -0.11700000
-7.23500013 -3.82800007 -0.19200000
-7.23486805 -3.82293034 -0.21999601
-7.23473024 -3.84338808 -0.14201429
-7.23471403 -3.83867741 -0.15477090
-7.23465776 -3.85981727 -0.09399550
-7.23426437 -3.83714008 -0.15900581
-7.23400021 -3.90400028 -0.01100000
-7.23400021 -3.82500005 -0.20800000
-7.23396206 -3.83897948 -0.15199921
-7.23391533 -3.88595462 -0.04099950
-7.23391151 -3.93332314 0.03246010
-7.23365068 -3.93178558 0.03024530
-7.23325634 -3.88753533 -0.03813030
-7.23317814 -3.82109427 -0.22300550
-7.23299980 -3.82699990 -0.19499999
-7.23288441 -3.82993865 -0.18199711
-7.23232460 -3.83632493 -0.16045859
-7.23223972 -3.86074400 -0.09173960
-7.23199987 -3.82399988 -0.20999999
-7.23199987 -3.82100010 -0.42899999
-7.23182869 -3.88790822 -0.03599910
-7.23166466 -3.81782293 -0.24498869
-7.23100185 -3.84900093 -0.11900000
-7.23099995 -3.86999989 -0.07100000
-7.23099995 -3.86700010 -0.07700000
-7.23091125 -3.85795307 -0.09699880
-7.23071289 -3.82141519 -0.22187039
-7.23043203 -3.83822942 -0.15400919
-7.23033333 -3.88599968 -0.03948440
-7.23006773 -3.81626344 -0.25431290
-7.23005629 -3.82674313 -0.19368720
-7.23000002 -3.82900000 -0.18500000
-7.23000002 -3.82299995 -0.21500000
-7.23000002 -3.81699991 -0.24800000
-7.22926950 -3.83414340 -0.16400610
-7.22920132 -3.82010651 -0.22800639
-7.22905207 -3.88302827 -0.04400030
-7.22900009 -3.93099999 0.03100000
-7.22900009 -3.83100009 -0.17700000
-7.22800016 -3.92699981 0.02600000
-7.22800016 -3.90599990 -0.00400000
-7.22800016 -3.90100002 -0.01400000
-7.22800016 -3.85999990 -0.09100000
-7.22800016 -3.81900001 -0.23000000
-7.22799253 -3.82199597 -0.21799980
-7.22766876 -3.83582425 -0.15699279
-7.22700500 -3.84700251 -0.12100010
-7.22700405 -3.85600185 -0.09900000
-7.22700024 -3.81599998 -0.25299999
-7.22700024 -3.81800008 -0.41999999
-7.22669792 -3.86483836 -0.07899670
-7.22665739 -3.83455467 -0.16113649
-7.22664452 -3.83281136 -0.16699180
-7.22630405 -3.88516378 -0.03900160
-7.22611618 -3.83006144 -0.18000290
-7.22600555 -3.82100296 -0.22000021
-7.22599983 -3.93200016 0.03300000
-7.22599983 -3.81499982 -0.25600001
-7.22563267 -3.97844934 0.08803210
-7.22532368 -3.83305764 -0.16400661
-7.22499990 -3.93699980 0.04100000
-7.22499990 -3.81699991 -0.41800001
-7.22487164 -3.86550021 -0.07715450
-7.22425652 -3.85813713 -0.09400330
-7.22414255 -3.83107567 -0.16900329
-7.22399998 -3.97499990 0.08600000
-7.22399998 -3.84899998 -0.11700000
-7.22399998 -3.82599998 -0.19200000
-7.22399998 -3.82299995 -0.20800000
-7.22399998 -3.81999993 -0.43099999
-7.22399473 -3.81999731 -0.22299980
-7.22395039 -3.83444285 -0.15897690
-7.22388458 -3.82793880 -0.18199711
-7.22360373 -3.88078713 -0.04599750
-7.22301960 -3.84701347 -0.12032340
-7.22299957 -3.93299985 0.03600000
-7.22299957 -3.92699981 0.02800000
-7.22299957 -3.85400009 -0.10200000
-7.22299576 -3.84499788 -0.12399990
-7.22203255 -3.86301732 -0.08200040
-7.22200537 -3.81900311 -0.22500020
-7.22200012 -3.82500005 -0.19499999
-7.22200012 -3.82200003 -0.20999999
-7.22200012 -3.81900001 -0.42800000
-7.22138929 -3.83020639 -0.17200930
-7.22115898 -3.88121891 -0.04384880
-7.22115850 -3.90308571 -0.00600010
-7.22115231 -3.83254981 -0.16198100
-7.22100019 -3.97900033 0.09000000
-7.22100019 -3.86500001 -0.07600000
-7.22100019 -3.82699990 -0.18500000
-7.22100019 -3.81499982 -0.24300000
-7.22100019 -3.80900002 -0.35299999
-7.22092867 -3.83116102 -0.16649701
-7.22091389 -3.85515523 -0.09824850
-7.22067833 -3.92411971 0.02436430
-7.22048569 -3.84672570 -0.11899150
-7.22036409 -3.80919194 -0.35001770
-7.21999979 -3.88499999 -0.03700000
-7.21999979 -3.82299995 -0.19700000
-7.21999979 -3.81399989 -0.24600001
-7.21999216 -3.81799603 -0.22799981
-7.21986341 -3.97632790 0.08706690
-7.21964502 -3.87917209 -0.04736500
-7.21899986 -3.92800021 0.03000000
-7.21899986 -3.84299994 -0.12600000
-7.21895838 -3.82897830 -0.17399900
-7.21843719 -3.83117104 -0.16396450
-7.21840572 -3.82974315 -0.16954200
-7.21799994 -3.81699991 -0.23000000
-7.21768761 -3.93337440 0.03800360
-7.21757841 -3.90377212 -0.00399980
-7.21742678 -3.82222605 -0.20001180
-7.21703672 -3.85312390 -0.10050780
-7.21700001 -3.97099972 0.08300000
-7.21695137 -3.86297369 -0.07899950
-7.21651173 -3.82774091 -0.17698801
-7.21600008 -3.93499994 0.04100000
-7.21600008 -3.81599998 -0.41999999
-7.21595907 -3.92151523 0.02237930
-7.21586180 -3.87992597 -0.04399920
-7.21581221 -3.92389798 0.02599930
-7.21535254 -3.82118654 -0.20200990
-7.21518040 -3.82201838 -0.19708860
-7.21500015 -4.00799990 0.12000000
-7.21500015 -3.92899990 0.03300000
-7.21500015 -3.89899993 -0.00900000
-7.21500015 -3.88199997 -0.03900000
-7.21486950 -3.86047125 -0.08270300
-7.21421194 -3.92226911 0.02421690
-7.21412182 -3.84237361 -0.12583479
-7.21409702 -3.82605124 -0.17900240
-7.21400023 -4.01100016 0.12200000
-7.21373606 -3.81985974 -0.20499250
-7.21335268 -3.82865620 -0.16898480
-7.21322727 -3.87512231 -0.05100160
-7.21299982 -3.91899991 0.02000000
-7.21299982 -3.85800004 -0.08700000
-7.21299982 -3.85200000 -0.10100000
-7.21277809 -3.86088157 -0.08099750
-7.21252823 -3.93286157 0.03915500
-7.21230507 -3.83116198 -0.16200680
-7.21199989 -3.92400002 0.02800000
-7.21199989 -3.80699992 -0.35800001
-7.21191883 -3.81895709 -0.20699769
-7.21180487 -3.97389245 0.08699760
-7.21179533 -3.80689216 -0.35498989
-7.21172476 -3.93044257 0.03664510
-7.21167040 -3.82782531 -0.17199209
-7.21125126 -3.82513309 -0.18200630
-7.21099997 -3.88299990 -0.03700000
-7.21099997 -3.80699992 -0.30399999
-7.21099901 -3.87699938 -0.04700000
-7.21091127 -3.90041137 -0.00599910
-7.21079302 -3.80689073 -0.34998989
-7.21074200 -3.81961608 -0.20403250
-7.21068573 -3.80683398 -0.34698489
-7.21000004 -3.84100008 -0.12700000
-7.21000004 -3.82100010 -0.19700000
-7.20999289 -3.81799626 -0.20999980
-7.20960665 -3.82679129 -0.17399050
-7.20960045 -3.82978749 -0.16399090
-7.20902681 -3.89860702 -0.00759340
-7.20900011 -3.92000008 0.02300000
-7.20900011 -3.84899998 -0.10400000
-7.20879459 -3.85789013 -0.08399760
-7.20800018 -3.93099999 0.03800000
-7.20800018 -3.92499995 0.03100000
-7.20800018 -3.84599996 -0.11200000
-7.20800018 -3.81699991 -0.21200000
-7.20799351 -3.81999636 -0.19999979
-7.20794773 -3.87297177 -0.05399960
-7.20737267 -3.92243958 0.02717980
-7.20730734 -3.82516313 -0.17700750
-7.20709896 -3.82805276 -0.16700231
-7.20699978 -3.91599989 0.01800000
-7.20699978 -3.83699989 -0.13699999
-7.20695543 -3.82197642 -0.18699890
-7.20629263 -3.80589390 -0.35375181
-7.20614052 -3.87407589 -0.04900100
-7.20600557 -3.81900311 -0.20200020
-7.20599985 -3.88000011 -0.03900000
-7.20527792 -3.89748812 -0.00803090
-7.20499992 -3.96799994 0.08200000
-7.20499992 -3.92099977 0.02500000
-7.20499992 -3.88800001 -0.02400000
-7.20499992 -3.84400010 -0.11400000
-7.20487785 -3.82393479 -0.17899700
-7.20474529 -3.82086468 -0.18899330
-7.20469713 -3.84737229 -0.10601030
-7.20446110 -3.82724452 -0.16901080
-7.20400000 -3.85599995 -0.08700000
-7.20399570 -3.81799769 -0.20499989
-7.20325708 -3.87013817 -0.05700200
-7.20303297 -3.88890052 -0.02242430
-7.20300007 -3.80599999 -0.28900000
-7.20278502 -3.91581750 0.02014240
-7.20272589 -3.81684542 -0.20847321
-7.20225620 -3.82013559 -0.19200680
-7.20212317 -3.82306528 -0.18200310
-7.20209789 -3.91328478 0.01625900
-7.20200062 -3.80500007 -0.35800001
-7.20135164 -3.80518579 -0.35501730
-7.20123529 -3.84642434 -0.10623260
-7.20104694 -3.80502486 -0.35200229
-7.20100021 -3.92099977 0.02800000
-7.20100021 -3.84499979 -0.10900000
-7.20086050 -3.87192464 -0.05199900
-7.20081663 -3.92730641 0.03515620
-7.20042992 -3.86956000 -0.05614750
-7.20009232 -3.81904888 -0.19400249
-7.20001364 -3.82091999 -0.18643850
-7.20000124 -3.89800072 -0.00700000
-7.19999981 -3.81299996 -0.22300000
-7.19999981 -3.80399990 -0.29899999
-7.19999218 -3.81599617 -0.20999980
-7.19969368 -3.82183743 -0.18399221
-7.19899988 -3.81800008 -0.45800000
-7.19888210 -3.86693668 -0.05899900
-7.19866180 -3.81182051 -0.22498940
-7.19803905 -3.84508920 -0.10775260
-7.19799995 -3.88800001 -0.02200000
-7.19799995 -3.84699988 -0.10400000
-7.19799995 -3.84400010 -0.11200000
-7.19799995 -3.81499982 -0.21200000
-7.19799566 -3.81799793 -0.19699989
-7.19739389 -3.82020903 -0.18701030
-7.19720268 -3.91068959 0.01453280
-7.19700003 -3.83999991 -0.11900000
-7.19690847 -3.81095147 -0.22799709
-7.19658375 -3.81730938 -0.45603701
-7.19600153 -3.86900091 -0.05400000
-7.19600010 -3.96300006 0.08000000
-7.19595909 -3.81697822 -0.19899890
-7.19579983 -3.86661053 -0.05819210
-7.19555712 -3.91275907 0.01799890
-7.19542408 -3.81742978 -0.19568890
-7.19500875 -3.81000471 -0.23000030
-7.19500542 -3.81900239 -0.18900010
-7.19500017 -3.96499968 0.08200000
-7.19482231 -3.81590581 -0.45298880
-7.19465971 -3.84481812 -0.10599500
-7.19456434 -3.90876269 0.01299920
-7.19399977 -3.84200001 -0.11400000
-7.19399977 -3.81800008 -0.46300000
-7.19385767 -3.81592441 -0.20199600
-7.19382000 -3.86490345 -0.06199840
-7.19300032 -3.80900002 -0.23300000
-7.19300032 -3.81499982 -0.44999999
-7.19299459 -3.83799720 -0.12199990
-7.19259834 -3.81778669 -0.19198930
-7.19214296 -3.81407619 -0.20400409
-7.19199991 -3.85200000 -0.08600000
-7.19199991 -3.82299995 -0.48400000
-7.19129610 -3.96110296 0.07908600
-7.19122458 -3.86612058 -0.05700180
-7.19099998 -3.91300011 0.02000000
-7.19099998 -3.86899996 -0.05200000
-7.19099998 -3.84800005 -0.09400000
-7.19099998 -3.84299994 -0.10900000
-7.19099998 -3.81100011 -0.22200000
-7.19099998 -3.80200005 -0.29800001
-7.19099998 -3.81699991 -0.46000001
-7.19096804 -3.80951786 -0.22827040
-7.19031620 -3.81616783 -0.19400850
-7.19015312 -3.90665698 0.01174730
-7.19000053 -3.80699992 -0.23999999
-7.18995523 -3.81297588 -0.20699871
-7.18934870 -3.86361194 -0.06169440
-7.18920660 -3.83742571 -0.12140480
-7.18918133 -3.86209726 -0.06400160
-7.18917227 -3.90909386 0.01500040
-7.18907928 -3.81004190 -0.22500250
-7.18903542 -3.80826902 -0.23227480
-7.18900013 -3.83599997 -0.12400000
-7.18843937 -3.81289005 -0.20486151
-7.18820286 -3.91281343 0.02089610
-7.18809366 -3.90505099 0.01000010
-7.18807983 -3.84658337 -0.09607410
-7.18800020 -3.84999990 -0.08900000
-7.18800020 -3.81499982 -0.45500001
-7.18798876 -3.80599403 -0.24299960
-7.18798685 -3.82126021 -0.48252720
-7.18782282 -3.81490564 -0.19699509
-7.18774557 -3.81186509 -0.20899260
-7.18717909 -3.80909491 -0.22700571
-7.18699980 -3.95799994 0.07700000
-7.18699980 -3.91400003 0.02300000
-7.18696308 -3.81421185 -0.20020799
-7.18634081 -3.91098809 0.01918420
-7.18625402 -3.86413670 -0.05900210
-7.18599987 -3.95999980 0.07900000
-7.18599987 -3.86599994 -0.05400000
-7.18599987 -3.83800006 -0.11900000
-7.18599987 -3.80500007 -0.24500000
-7.18593025 -3.81396317 -0.45199561
-7.18538523 -3.80767441 -0.22998030
-7.18534184 -3.81118155 -0.21201010
-7.18525171 -3.80565310 -0.24214810
-7.18488407 -3.90893650 0.01699970
-7.18429518 -3.81581497 -0.46116960
-7.18425131 -3.86013460 -0.06700230
-7.18400097 -3.83651400 -0.12112990
-7.18400002 -3.87100005 -0.04500000
-7.18363905 -3.81280780 -0.44997731
-7.18355989 -3.81836033 -0.47817039
-7.18326569 -3.81014085 -0.21400790
-7.18310547 -3.81205630 -0.20200300
-7.18300295 -3.84400177 -0.09900000
-7.18300009 -3.96199989 0.08200000
-7.18300009 -3.84999990 -0.08600000
-7.18300009 -3.80699992 -0.23199999
-7.18252277 -3.81105232 -0.20584980
-7.18222094 -3.90384817 0.01060130
-7.18213797 -3.86107421 -0.06200120
-7.18200016 -3.82100010 -0.48400000
-7.18156195 -3.80876756 -0.21698681
-7.18103075 -3.87038922 -0.04473260
-7.18100023 -3.96300006 0.08500000
-7.18100023 -3.86700010 -0.05200000
-7.18100023 -3.81699991 -0.17900001
-7.18100023 -3.80300021 -0.25299999
-7.18100023 -3.81499982 -0.46000001
-7.18100023 -3.81699991 -0.47600001
-7.18088388 -3.90993667 0.01999970
-7.18069506 -3.81083798 -0.20399129
-7.18051004 -3.80998063 -0.21079320
-7.18035269 -3.90223789 0.00778630
-7.18014097 -3.85707569 -0.06900140
-7.17999983 -3.84599996 -0.09400000
-7.17977762 -3.84420753 -0.09770700
-7.17966652 -3.80182338 -0.25498810
-7.17953014 -3.90826535 0.01789000
-7.17943907 -3.80823302 -0.21901339
-7.17914391 -3.81907654 -0.48100960
-7.17899990 -3.86800003 -0.04700000
-7.17899990 -3.84800005 -0.08900000
-7.17899990 -3.83899999 -0.10900000
-7.17899990 -3.83400011 -0.12400000
-7.17899990 -3.80500007 -0.23999999
-7.17899990 -3.79900002 -0.28799999
-7.17899656 -3.84199810 -0.10200000
-7.17873430 -3.81585860 -0.18199331
-7.17872238 -3.80813241 -0.21613470
-7.17845201 -3.80970907 -0.20698421
-7.17813110 -3.79806924 -0.29300529
-7.17807817 -3.90604234 0.01500020
-7.17799997 -3.80100012 -0.25799999
-7.17799997 -3.79800010 -0.35900000
-7.17799997 -3.79800010 -0.36199999
-7.17799997 -3.80100012 -0.39300001
-7.17799997 -3.80699992 -0.43099999
-7.17782164 -3.80690551 -0.22199450
-7.17778969 -3.85888720 -0.06399810
-7.17734671 -3.80418372 -0.24201170
-7.17703438 -3.96041536 0.08301520
-7.17700005 -3.79800010 -0.29800001
-7.17683125 -3.80091071 -0.38999081
-7.17638683 -3.85771656 -0.06727720
-7.17625809 -3.90214014 0.01000040
-7.17621851 -3.81511617 -0.18400560
-7.17620230 -3.80910754 -0.20900591
-7.17608976 -3.84404850 -0.09600120
-7.17601490 -3.79700828 -0.30500060
-7.17600012 -3.86400008 -0.05400000
-7.17600012 -3.81199980 -0.19700000
-7.17600012 -3.80300021 -0.24400000
-7.17600012 -3.79699993 -0.30800000
-7.17600012 -3.79699993 -0.35400000
-7.17591906 -3.80595732 -0.22399750
-7.17588568 -3.81793928 -0.47799230
-7.17575359 -3.79686952 -0.35098791
-7.17567492 -3.80582738 -0.42898050
-7.17566586 -3.83734560 -0.11152830
-7.17565393 -3.85481405 -0.07199650
-7.17537260 -3.80695748 -0.21993519
-7.17522621 -3.89812279 0.00500020
-7.17510796 -3.95718670 0.07921180
-7.17500019 -3.83999991 -0.10400000
-7.17500019 -3.79900002 -0.38499999
-7.17496300 -3.79698038 -0.34599820
-7.17446232 -3.80771470 -0.21198410
-7.17440605 -3.79621482 -0.34101930
-7.17438221 -3.79567289 -0.31597281
-7.17434168 -3.85559750 -0.06979460
-7.17416382 -3.90708971 0.01800040
-7.17408180 -3.80504346 -0.22700261
-7.17407942 -3.79604197 -0.32100359
-7.17401218 -3.79600692 -0.33300060
-7.17400789 -3.79600453 -0.32800040
-7.17400026 -3.79600024 -0.33600000
-7.17399979 -3.86899996 -0.04400000
-7.17399979 -3.80200005 -0.24699999
-7.17399979 -3.79900002 -0.26800001
-7.17399979 -3.79600000 -0.31299999
-7.17396164 -3.81097984 -0.19899900
-7.17394447 -3.81397033 -0.18699861
-7.17333603 -3.90444899 0.01476890
-7.17321110 -3.85711360 -0.06700200
-7.17312241 -3.80506516 -0.42600730
-7.17299986 -3.80100012 -0.25000000
-7.17299986 -3.81599998 -0.47600001
-7.17290926 -3.85411739 -0.07193510
-7.17265987 -3.80681944 -0.21398990
-7.17239857 -3.80421138 -0.22901270
-7.17235327 -3.79683733 -0.35923120
-7.17225742 -3.84213758 -0.09900350
-7.17214298 -3.81207585 -0.18900380
-7.17203665 -3.79801941 -0.27300140
-7.17199993 -3.95799994 0.08200000
-7.17199993 -3.82100010 -0.15700001
-7.17192221 -3.90195775 0.01199990
-7.17180920 -3.80989838 -0.20199460
-7.17137194 -3.80319738 -0.42302200
-7.17135000 -3.83518744 -0.11400560
-7.17134666 -3.81518435 -0.17900871
-7.17121935 -3.80311656 -0.23200710
-7.17117167 -3.80009103 -0.25500610
-7.17100000 -3.94899988 0.07200000
-7.17100000 -3.79699993 -0.28000000
-7.17095470 -3.80597639 -0.21699861
-7.17086363 -3.85292649 -0.07399860
-7.17074823 -3.84001255 -0.10202650
-7.17003918 -3.81102133 -0.19200110
-7.17000008 -3.82599998 -0.13900000
-7.17000008 -3.80800009 -0.20400000
-7.17000008 -3.79699993 -0.28299999
-7.17000008 -3.79699993 -0.37200001
-7.17000008 -3.81100011 -0.46200001
-7.16986084 -3.89892411 0.00799980
-7.16977310 -3.79672337 -0.29157001
-7.16951513 -3.80227304 -0.42103019
-7.16927338 -3.81914520 -0.15900600
-7.16913843 -3.79607320 -0.36700711
-7.16913319 -3.89507222 0.00200000
-7.16907883 -3.81404161 -0.18200199
-7.16900015 -3.86599994 -0.04700000
-7.16900015 -3.84800005 -0.08200000
-7.16900015 -3.83699989 -0.10900000
-7.16900015 -3.82800007 -0.13200000
-7.16900015 -3.79699993 -0.28799999
-7.16899538 -3.80499721 -0.22199979
-7.16893053 -3.80045652 -0.24862650
-7.16886330 -3.85492635 -0.06899870
-7.16882133 -3.80190539 -0.23699410
-7.16881657 -3.79590273 -0.36399069
-7.16872358 -3.90211391 0.01345550
-7.16853380 -3.80828357 -0.20701540
-7.16800022 -3.95000029 0.07400000
-7.16800022 -3.83299971 -0.11700000
-7.16800022 -3.80999994 -0.19400001
-7.16800022 -3.79900002 -0.39199999
-7.16794920 -3.80197310 -0.41799709
-7.16779709 -3.79589248 -0.29499161
-7.16774893 -3.79586720 -0.35898739
-7.16733503 -3.83603835 -0.11069520
-7.16724110 -3.79643321 -0.28249401
-7.16722012 -3.82411742 -0.14200440
-7.16718435 -3.81009793 -0.45901179
-7.16717052 -3.89660573 0.00597810
-7.16701555 -3.80100846 -0.41500089
-7.16700411 -3.81300235 -0.18400010
-7.16699982 -3.80999994 -0.19700000
-7.16699982 -3.79600000 -0.29800001
-7.16690254 -3.80694818 -0.20899720
-7.16682196 -3.85044169 -0.07700880
-7.16673899 -3.79486179 -0.30098900
-7.16663551 -3.80080676 -0.24198771
-7.16656351 -3.79476881 -0.30598140
-7.16651678 -3.79774427 -0.38697389
-7.16651106 -3.80374026 -0.22698450
-7.16640043 -3.81821322 -0.16100900
-7.16640043 -3.79521203 -0.35401979
-7.16618252 -3.90032148 0.01176240
-7.16599989 -3.84400010 -0.08900000
-7.16599989 -3.79800010 -0.26699999
-7.16599989 -3.80399990 -0.42800000
-7.16585827 -3.79792476 -0.26999471
-7.16581869 -3.79490399 -0.34399131
-7.16578960 -3.79488873 -0.34099001
-7.16578627 -3.79488683 -0.34898961
-7.16540575 -3.79421496 -0.33601910
-7.16525555 -3.83513689 -0.11200400
-7.16508198 -3.80604362 -0.21200240
-7.16500711 -3.80900383 -0.19900019
-7.16499996 -3.83800006 -0.10400000
-7.16499996 -3.82599998 -0.13400000
-7.16499996 -3.81399989 -0.17399999
-7.16499996 -3.79699993 -0.27500001
-7.16499996 -3.79699993 -0.38400000
-7.16499996 -3.80800009 -0.45699999
-7.16499615 -3.81199789 -0.18699990
-7.16487360 -3.80293298 -0.22899599
-7.16483307 -3.85191011 -0.07199830
-7.16473103 -3.79385781 -0.31098831
-7.16466999 -3.80282497 -0.42498040
-7.16466475 -3.94665813 0.07065660
-7.16460657 -3.79379201 -0.32298231
-7.16460323 -3.79979014 -0.40997729
-7.16459894 -3.79378772 -0.32598180
-7.16455936 -3.79376650 -0.33097959
-7.16436291 -3.79419231 -0.31601599
-7.16418743 -3.80009913 -0.24700651
-7.16417122 -3.82309127 -0.14400341
-7.16416454 -3.84608793 -0.08400190
-7.16408873 -3.81338048 -0.18026760
-7.16407108 -3.89393497 0.00267850
-7.16400099 -3.83319378 -0.11467540
-7.16400003 -3.81699991 -0.16400000
-7.16358376 -3.80477905 -0.21398760
-7.16344213 -3.84877467 -0.07901590
-7.16327477 -3.79914570 -0.40701559
-7.16325808 -3.89214015 0.00000000
-7.16300011 -3.94499993 0.06900000
-7.16300011 -3.81299996 -0.17600000
-7.16299534 -3.80199718 -0.23199980
-7.16299295 -3.80799627 -0.20199980
-7.16298532 -3.80199218 -0.42299911
-7.16295862 -3.81097841 -0.18899889
-7.16255951 -3.80015373 -0.24015750
-7.16233063 -3.84967184 -0.07587020
-7.16200018 -3.85299993 -0.06700000
-7.16200018 -3.81900001 -0.15700001
-7.16200018 -3.79500008 -0.28000000
-7.16193819 -3.81730819 -0.16048270
-7.16187382 -3.82093263 -0.14699741
-7.16170692 -3.80437541 -0.21702141
-7.16168547 -3.84183121 -0.09199600
-7.16164923 -3.89980912 0.01299940
-7.16156721 -3.87486172 -0.02720680
-7.16144085 -3.81660438 -0.16352500
-7.16131973 -3.79816985 -0.25201130
-7.16125965 -3.80113792 -0.42001519
-7.16100597 -3.80100322 -0.23400021
-7.16099977 -3.82399988 -0.13900000
-7.16099977 -3.80699992 -0.20400000
-7.16099977 -3.79500008 -0.37200001
-7.16099977 -3.80900002 -0.46200001
-7.16087723 -3.79793501 -0.40199310
-7.16080952 -3.80989838 -0.19199491
-7.16029406 -3.82243752 -0.14226981
-7.16028738 -3.79860473 -0.24479990
-7.16008186 -3.85004425 -0.07400090
-7.16005802 -3.79703045 -0.25400209
-7.16001177 -3.89808846 0.01088050
-7.15999985 -3.94600010 0.07100000
-7.15999985 -3.84299994 -0.08700000
-7.15999985 -3.79500008 -0.28200001
-7.15995407 -3.79497528 -0.36899760
-7.15988874 -3.79994082 -0.41699350
-7.15949774 -3.79426384 -0.36602551
-7.15948772 -3.84679937 -0.08201700
-7.15945435 -3.81224179 -0.18101150
-7.15945005 -3.81724000 -0.15900999
-7.15922594 -3.89512324 0.00700020
-7.15914154 -3.82129669 -0.14505720
-7.15908146 -3.80004334 -0.23700270
-7.15899992 -3.82599998 -0.13200000
-7.15899992 -3.81999993 -0.14900000
-7.15899992 -3.81399989 -0.16900000
-7.15892124 -3.84472370 -0.08483850
-7.15861702 -3.79379702 -0.36098069
-7.15852642 -3.89131784 0.00111820
-7.15842247 -3.79722381 -0.25701520
-7.15830135 -3.79915977 -0.41501740
-7.15818405 -3.80809784 -0.45901179
-7.15799999 -3.83100009 -0.11700000
-7.15774679 -3.83940029 -0.09400980
-7.15769625 -3.88883519 -0.00299990
-7.15739775 -3.79321074 -0.35601979
-7.15735292 -3.79918694 -0.23901179
-7.15700006 -3.85100007 -0.06900000
-7.15700006 -3.79299998 -0.30000001
-7.15700006 -3.79600000 -0.39399999
-7.15697670 -3.79584646 -0.26104400
-7.15690517 -3.79294944 -0.35299531
-7.15678120 -3.81588340 -0.16199499
-7.15661335 -3.79879475 -0.41197771
-7.15612698 -3.79806757 -0.24200431
-7.15611839 -3.79744983 -0.40599000
-7.15600014 -3.87400031 -0.02700000
-7.15600014 -3.84200001 -0.08900000
-7.15600014 -3.82399988 -0.13400000
-7.15600014 -3.81299996 -0.17100000
-7.15600014 -3.80599999 -0.45699999
-7.15596533 -3.84698129 -0.07699960
-7.15574121 -3.86985993 -0.03199880
-7.15570116 -3.79484177 -0.26398900
-7.15558481 -3.81962466 -0.14710949
-7.15549850 -3.84575224 -0.08143240
-7.15539789 -3.89621639 0.01000060
-7.15530396 -3.84470081 -0.08401530
-7.15509081 -3.79504848 -0.38900489
-7.15500021 -3.81199980 -0.17399999
-7.15500021 -3.79200006 -0.31000000
-7.15493965 -3.79796791 -0.40999651
-7.15492201 -3.79195833 -0.32499650
-7.15490484 -3.82094908 -0.14399810
-7.15490246 -3.79194832 -0.31299570
-7.15483475 -3.79191256 -0.31999260
-7.15475130 -3.79186797 -0.32798859
-7.15445948 -3.79663539 -0.40232289
-7.15432596 -3.84058404 -0.09095840
-7.15421343 -3.79411292 -0.26700789
-7.15399981 -3.83699989 -0.09700000
-7.15399981 -3.82599998 -0.12700000
-7.15399981 -3.81499982 -0.16400000
-7.15390205 -3.79694843 -0.24699660
-7.15377235 -3.79503226 -0.26150969
-7.15339231 -3.79720831 -0.40702230
-7.15304661 -3.89202571 0.00500000
-7.15299988 -3.81100011 -0.17600000
-7.15277624 -3.79388142 -0.38398799
-7.15233278 -3.79588580 -0.40069240
-7.15223932 -3.79612708 -0.40401351
-7.15214443 -3.81907701 -0.14600290
-7.15206718 -3.79551840 -0.25463581
-7.15199995 -3.85100007 -0.06700000
-7.15180731 -3.79405499 -0.26489681
-7.15177488 -3.88587785 -0.00499980
-7.15151024 -3.79573989 -0.25198269
-7.15148354 -3.88826299 0.00000000
-7.15136051 -3.79319119 -0.38101920
-7.15130758 -3.84516501 -0.07900340
-7.15119267 -3.84210300 -0.08700230
-7.15116167 -3.79308581 -0.27200621
-7.15074587 -3.82386374 -0.12899540
-7.15074110 -3.87086010 -0.02999890
-7.15073109 -3.81223011 -0.16958040
-7.15032148 -3.83714080 -0.09531920
-7.15000010 -3.94300008 0.07200000
-7.15000010 -3.80900002 -0.17900001
-7.14994955 -3.79497361 -0.39899719
-7.14924860 -3.79213166 -0.27700961
-7.14924574 -3.88417816 -0.00634930
-7.14916849 -3.79208922 -0.37600890
-7.14908695 -3.89304686 0.00700010
-7.14900017 -3.81800008 -0.14900000
-7.14900017 -3.79099989 -0.28200001
-7.14900017 -3.79399991 -0.39600000
-7.14868879 -3.86771178 -0.03330500
-7.14848709 -3.79364443 -0.38877350
-7.14838648 -3.79420519 -0.25701389
-7.14799976 -3.92699981 0.05400000
-7.14799976 -3.80200005 -0.44800001
-7.14799166 -3.79099560 -0.37099949
-7.14730263 -3.82216191 -0.13200560
-7.14721441 -3.80811477 -0.18100540
-7.14713097 -3.79106975 -0.36800680
-7.14708567 -3.88904715 0.00200000
-7.14703846 -3.84302068 -0.08200040
-7.14700890 -3.79064727 -0.27998871
-7.14699984 -3.99099994 0.12000000
-7.14699984 -3.84899998 -0.06900000
-7.14699984 -3.81100011 -0.17200001
-7.14699984 -3.79099989 -0.28700000
-7.14695597 -3.83897638 -0.08899950
-7.14671564 -3.86856937 -0.03176100
-7.14622593 -3.88212276 -0.00800030
-7.14607716 -3.79304123 -0.26200280
-7.14600897 -3.79000497 -0.36300051
-7.14599991 -3.95300007 0.08400000
-7.14599991 -3.94400024 0.07400000
-7.14599991 -3.93499994 0.06400000
-7.14599991 -3.79299998 -0.39100000
-7.14592218 -3.88495779 -0.00300000
-7.14586639 -3.78992891 -0.29199451
-7.14513445 -3.80607152 -0.18400350
-7.14501572 -3.79200840 -0.26600060
-7.14499998 -3.89599991 0.01500000
-7.14487171 -3.99214816 0.12183290
-7.14483309 -3.78891134 -0.35799161
-7.14474630 -3.79186535 -0.38598630
-7.14468193 -3.78983140 -0.29698679
-7.14455271 -3.82175994 -0.13124290
-7.14429617 -3.79162621 -0.26897350
-7.14400005 -3.93699980 0.06600000
-7.14400005 -3.83500004 -0.09700000
-7.14400005 -3.82399988 -0.12700000
-7.14400005 -3.78900003 -0.30199999
-7.14379358 -3.78889060 -0.35498980
-7.14353037 -3.79175091 -0.38297480
-7.14314938 -3.88837910 0.00271190
-7.14309978 -3.78805304 -0.31200439
-7.14301729 -3.83994532 -0.08588730
-7.14301348 -3.78800750 -0.31700060
-7.14300013 -3.79399991 -0.24400000
-7.14300013 -3.78800011 -0.30700001
-7.14300013 -3.78800011 -0.34799999
-7.14298964 -3.95145822 0.08318740
-7.14286041 -3.88992405 0.00499990
-7.14284945 -3.88706493 0.00017360
-7.14270735 -3.80484414 -0.18599240
-7.14269209 -3.78783703 -0.31998619
-7.14267874 -3.83761716 -0.09011020
-7.14237309 -3.92568016 0.05377560
-7.14227295 -3.78814483 -0.34501320
-7.14200878 -3.78800488 -0.33200040
-7.14200020 -3.93899989 0.06900000
-7.14200020 -3.80200005 -0.19900000
-7.14200020 -3.79299998 -0.24699999
-7.14197826 -3.78858590 -0.35860559
-7.14190578 -3.78795052 -0.33499560
-7.14183569 -3.78791285 -0.32699239
-7.14168978 -3.99092674 0.12136820
-7.14168119 -3.79083061 -0.27398771
-7.14156771 -3.78982711 -0.27643120
-7.14152002 -3.78827620 -0.34002480
-7.14123344 -3.79012418 -0.37801239
-7.14116096 -3.78886724 -0.29655251
-7.14099979 -3.81900001 -0.13699999
-7.14098787 -3.93379951 0.06331730
-7.14074278 -3.82186246 -0.12899540
-7.14039755 -3.88221622 -0.00500030
-7.14025497 -3.80556512 -0.18313821
-7.14023399 -3.95132685 0.08363530
-7.14021873 -3.87911892 -0.01000030
-7.13999987 -3.92300034 0.05100000
-7.13999987 -3.86500001 -0.03500000
-7.13999987 -3.85899997 -0.04500000
-7.13999987 -3.80699992 -0.17900001
-7.13999987 -3.80399990 -0.18900000
-7.13999987 -3.80100012 -0.20100001
-7.13951206 -3.78856587 -0.29115570
-7.13913870 -3.78907371 -0.27900541
-7.13909245 -3.78904891 -0.37300479
-7.13900042 -3.89300013 0.01200000
-7.13899994 -3.80900002 -0.16700000
-7.13888359 -3.83793759 -0.08699860
-7.13862467 -3.79260755 -0.24556750
-7.13831997 -3.78870106 -0.28205219
-7.13800859 -3.78900433 -0.37000039
-7.13800001 -3.94799972 0.08100000
-7.13800001 -3.94000030 0.07100000
-7.13800001 -3.93099999 0.06100000
-7.13800001 -3.92499995 0.05400000
-7.13794994 -3.83497334 -0.09399930
-7.13775778 -3.78711128 -0.31694779
-7.13758707 -3.78739452 -0.29932010
-7.13741207 -3.83601832 -0.09064210
-7.13732767 -3.88471961 -0.00095510
-7.13731003 -3.82016611 -0.13100570
-7.13714075 -3.88607669 0.00200000
-7.13712645 -3.78806710 -0.28700510
-7.13700867 -3.80800462 -0.16900019
-7.13700008 -3.95900011 0.09300000
-7.13700008 -3.95099998 0.08400000
-7.13688231 -3.78793764 -0.36499399
-7.13683987 -3.80541205 -0.18216200
-7.13631868 -3.89296341 0.01283280
-7.13574123 -3.78786302 -0.29198939
-7.13570166 -3.98824835 0.12007920
-7.13561201 -3.78779387 -0.35998040
-7.13560343 -3.88278389 -0.00299980
-7.13553238 -3.85628772 -0.04700350
-7.13527536 -3.85914874 -0.04200160
-7.13513422 -3.80407166 -0.18400350
-7.13504601 -3.87602496 -0.01300010
-7.13500023 -3.80699992 -0.17200001
-7.13481379 -3.87989879 -0.00799980
-7.13472652 -3.87757230 -0.01049100
-7.13450527 -3.80807948 -0.16672119
-7.13426685 -3.81814265 -0.13400500
-7.13425446 -3.78713560 -0.35501271
-7.13424158 -3.78612828 -0.35201189
-7.13418627 -3.83556247 -0.08898990
-7.13413715 -3.83207369 -0.09700190
-7.13405561 -3.78702974 -0.29700229
-7.13399982 -3.87299991 -0.01700000
-7.13399982 -3.86700010 -0.02800000
-7.13399982 -3.78600001 -0.34500000
-7.13398075 -3.78645921 -0.30895579
-7.13382435 -3.78590679 -0.33999160
-7.13363552 -3.78680682 -0.31198409
-7.13328743 -3.80280304 -0.18755279
-7.13322783 -3.78612089 -0.33701080
-7.13322210 -3.83329225 -0.09414440
-7.13318968 -3.78610039 -0.30200800
-7.13299990 -3.91899991 0.04900000
-7.13299990 -3.89000010 0.00900000
-7.13299990 -3.79200006 -0.24400000
-7.13266182 -3.78582048 -0.32398459
-7.13264608 -3.78581214 -0.32698381
-7.13238430 -3.78620434 -0.31701711
-7.13234663 -3.78618407 -0.33201611
-7.13211155 -3.78577757 -0.30517921
-7.13199997 -3.80000019 -0.19900000
-7.13199997 -3.79399991 -0.22900000
-7.13138628 -3.88144851 -0.00328130
-7.13130569 -3.80816340 -0.16400699
-7.13104725 -3.88302565 0.00000000
-7.13100004 -3.92099977 0.05100000
-7.13100004 -3.85400009 -0.05000000
-7.13100004 -3.81699991 -0.13600001
-7.13051844 -3.85673952 -0.04499700
-7.13029242 -3.80609012 -0.17136100
-7.13005495 -3.87902951 -0.00600000
-7.13004971 -3.83002615 -0.09900070
-7.13004446 -3.78549623 -0.30135429
-7.13000011 -3.80200005 -0.18900000
-7.13000011 -3.79900002 -0.20100001
-7.13000011 -3.79299998 -0.23100001
-7.13000011 -3.78999996 -0.24900000
-7.12984562 -3.83291674 -0.09199800
-7.12979269 -3.89035559 0.01066160
-7.12974405 -3.78739524 -0.27902910
-7.12947130 -3.87671256 -0.00999930
-7.12946129 -3.87438893 -0.01376410
-7.12926960 -3.80714369 -0.16600630
-7.12920570 -3.87086511 -0.01901360
-7.12900019 -3.94600010 0.08100000
-7.12900019 -3.82399988 -0.11400000
-7.12900019 -3.79500008 -0.21600001
-7.12885571 -3.78692317 -0.28199431
-7.12834358 -3.86418629 -0.03000140
-7.12800026 -3.95400023 0.09000000
-7.12797880 -3.78516102 -0.29923779
-7.12783051 -3.78590965 -0.28699321
-7.12776995 -3.78887773 -0.25399181
-7.12765312 -3.95626450 0.09218790
-7.12761641 -3.87298036 -0.01694400
-7.12739658 -3.80567837 -0.16898569
-7.12699986 -3.80300021 -0.17900001
-7.12699270 -3.79399610 -0.21899980
-7.12687683 -3.87425399 -0.01238080
-7.12599993 -3.91499972 0.04600000
-7.12599993 -3.85700011 -0.04200000
-7.12599993 -3.82200003 -0.11700000
-7.12599993 -3.79099989 -0.41900000
-7.12599802 -3.82799911 -0.10200000
-7.12598562 -3.85399270 -0.04699990
-7.12594604 -3.85587978 -0.04499270
-7.12560940 -3.83079028 -0.09399480
-7.12539053 -3.87917542 -0.00418770
-7.12530565 -3.78716230 -0.25901109
-7.12526703 -3.87177491 -0.01800830
-7.12500858 -3.79300451 -0.22100030
-7.12500000 -3.92899990 0.06400000
-7.12500000 -3.80500007 -0.17100000
-7.12500000 -3.80200005 -0.18099999
-7.12500000 -3.78999996 -0.41600001
-7.12454367 -3.79378080 -0.21808720
-7.12405491 -3.87302947 -0.01300010
-7.12404776 -3.87602592 -0.00800010
-7.12400007 -3.95799994 0.09500000
-7.12400007 -3.78399992 -0.36300001
-7.12369585 -3.78683805 -0.26098889
-7.12352991 -3.78375006 -0.35997620
-7.12347174 -3.78425050 -0.30702040
-7.12337255 -3.78419757 -0.29901561
-7.12314081 -3.78407478 -0.30400601
-7.12300014 -3.91700029 0.04900000
-7.12300014 -3.88800001 0.00900000
-7.12300014 -3.86500001 -0.02700000
-7.12300014 -3.79200006 -0.22400001
-7.12300014 -3.78900003 -0.24100000
-7.12266064 -3.85244250 -0.04976090
-7.12238789 -3.78320622 -0.35501939
-7.12225389 -3.78613472 -0.26400939
-7.12204599 -3.85421801 -0.04642750
-7.12200308 -3.82600164 -0.10400000
-7.12200022 -3.83500004 -0.08400000
-7.12200022 -3.80599999 -0.16400000
-7.12200022 -3.78800011 -0.24400000
-7.12200022 -3.78299999 -0.35200000
-7.12200022 -3.79399991 -0.44499999
-7.12152958 -3.82874680 -0.09699360
-7.12141085 -3.92923546 0.06504660
-7.12129593 -3.83115959 -0.09200380
-7.12099981 -3.78200030 -0.32400000
-7.12099981 -3.79099989 -0.42699999
-7.12082815 -3.79333925 -0.21701850
-7.12072897 -3.78185630 -0.32698750
-7.12035608 -3.82665181 -0.10071380
-7.12008667 -3.78204656 -0.33200410
-7.12001228 -3.78200698 -0.33700061
-7.11999989 -3.78800011 -0.24900000
-7.11999989 -3.78200030 -0.34000000
-7.11999989 -3.79299998 -0.44200000
-7.11985588 -3.78492355 -0.26899460
-7.11976480 -3.80487490 -0.16599450
-7.11966801 -3.91505432 0.04752330
-7.11945820 -3.78617191 -0.25701070
-7.11944532 -3.86832857 -0.02100720
-7.11934566 -3.79018426 -0.42402059
-7.11909103 -3.95120358 0.08904900
-7.11903906 -3.78903031 -0.41711140
-7.11899996 -3.94899988 0.08700000
-7.11899996 -3.91100025 0.04400000
-7.11899996 -3.82200003 -0.11400000
-7.11899996 -3.79800010 -0.46500000
-7.11868954 -3.87683082 -0.00499980
-7.11837530 -3.86941195 -0.01758930
-7.11811590 -3.86134529 -0.03104890
-7.11808395 -3.82404494 -0.10700130
-7.11804771 -3.87002563 -0.01500010
-7.11800051 -3.87300014 -0.01100000
-7.11800003 -3.80699992 -0.15600000
-7.11800003 -3.79299998 -0.21600001
-7.11800003 -3.78900003 -0.42100000
-7.11798525 -3.79117560 -0.22259910
-7.11785650 -3.78692365 -0.25399491
-7.11776733 -3.82633734 -0.09898290
-7.11774778 -3.92640805 0.06257320
-7.11752605 -3.83228350 -0.08700640
-7.11739969 -3.78321195 -0.27601549
-7.11708260 -3.82904434 -0.09400110
-7.11707687 -3.78304076 -0.27900299
-7.11700010 -3.80100012 -0.17900001
-7.11653137 -3.87396502 -0.00858700
-7.11636639 -3.78742075 -0.24272820
-7.11633825 -3.79218030 -0.21901040
-7.11617422 -3.85209417 -0.04800120
-7.11600018 -3.91899991 0.05300000
-7.11600018 -3.91300011 0.04600000
-7.11600018 -3.81999993 -0.11600000
-7.11600018 -3.79399991 -0.44999999
-7.11587238 -3.78493237 -0.25899529
-7.11583233 -3.80490994 -0.15899619
-7.11527348 -3.78871489 -0.42244950
-7.11509466 -3.79105043 -0.22100291
-7.11502504 -3.79803538 -0.46677929
-7.11499977 -3.95600033 0.09500000
-7.11499977 -3.95300007 0.09200000
-7.11499977 -3.80000019 -0.18099999
-7.11499977 -3.78800011 -0.41600001
-7.11475420 -3.87148952 -0.01189100
-7.11448145 -3.78084016 -0.32487980
-7.11439419 -3.82221198 -0.10900600
-7.11412811 -3.78506851 -0.26100469
-7.11400747 -3.79300427 -0.44700050
-7.11399984 -3.92600012 0.06300000
-7.11399984 -3.78999996 -0.22400001
-7.11399984 -3.78200030 -0.36199999
-7.11380100 -3.78089428 -0.35699001
-7.11378145 -3.82434511 -0.10198250
-7.11308050 -3.78404307 -0.26400301
-7.11299992 -3.92000008 0.05600000
-7.11299992 -3.85899997 -0.03300000
-7.11299992 -3.82999969 -0.08900000
-7.11299992 -3.80399990 -0.16100000
-7.11299801 -3.82699895 -0.09700000
-7.11298609 -3.78099251 -0.29399940
-7.11296797 -3.78698301 -0.24099889
-7.11284971 -3.95466900 0.09414670
-7.11274052 -3.87340307 -0.00800080
-7.11256313 -3.86430573 -0.02300180
-7.11214781 -3.86612988 -0.02013340
-7.11208677 -3.87004685 -0.01300020
-7.11202192 -3.79201150 -0.44400141
-7.11199999 -3.93400025 0.07300000
-7.11199999 -3.78099990 -0.35200000
-7.11199999 -3.79800010 -0.46799999
-7.11158466 -3.90788579 0.04193330
-7.11147881 -3.78625488 -0.24401639
-7.11122274 -3.82011962 -0.11200350
-7.11100817 -3.78000426 -0.33400041
-7.11100006 -3.77999997 -0.33899999
-7.11100006 -3.78900003 -0.42600000
-7.11090231 -3.78294778 -0.26899630
-7.11074877 -3.77986646 -0.32898840
-7.11070967 -3.78774595 -0.42202881
-7.11058283 -3.91730857 0.05339970
-7.11000013 -3.88000011 0.00400000
-7.11000013 -3.83200002 -0.08500000
-7.11000013 -3.77900004 -0.31700000
-7.11000013 -3.77999997 -0.32400000
-7.10998678 -3.79099274 -0.44199911
-7.10987902 -3.82239747 -0.10398360
-7.10981178 -3.78490019 -0.24599349
-7.10952616 -3.82033038 -0.10989900
-7.10925341 -3.78213501 -0.27400979
-7.10900307 -3.82500148 -0.09900000
-7.10900021 -3.94700003 0.08700000
-7.10900021 -3.91400003 0.05000000
-7.10900021 -3.90899968 0.04400000
-7.10900021 -3.80500007 -0.15600000
-7.10900021 -3.79299998 -0.19900000
-7.10851479 -3.86864161 -0.01383880
-7.10804176 -3.78102231 -0.27900159
-7.10799980 -3.78399992 -0.24900000
-7.10777807 -3.81888103 -0.11399650
-7.10726213 -3.79214001 -0.20100740
-7.10713291 -3.87007260 -0.01000020
-7.10699987 -3.78699994 -0.42100000
-7.10674381 -3.86086082 -0.02499910
-7.10666037 -3.82981706 -0.08699580
-7.10634279 -3.86718678 -0.01600080
-7.10632229 -3.77833152 -0.31741461
-7.10627604 -3.82061076 -0.10698910
-7.10617733 -3.80309510 -0.15900400
-7.10608673 -3.86404705 -0.02000020
-7.10599995 -3.95099998 0.09200000
-7.10599995 -3.94799972 0.09000000
-7.10599995 -3.79200006 -0.44900000
-7.10574865 -3.79086590 -0.20299280
-7.10500002 -3.91499972 0.05300000
-7.10500002 -3.81399989 -0.12400000
-7.10500002 -3.78500009 -0.23600000
-7.10499811 -3.82299876 -0.10200000
-7.10469246 -3.81683493 -0.11699490
-7.10452414 -3.77918410 -0.29176870
-7.10450029 -3.86271310 -0.02200020
-7.10400009 -3.90300012 0.03800000
-7.10400009 -3.87700009 0.00100000
-7.10398197 -3.79099011 -0.44699880
-7.10390663 -3.78994989 -0.20599730
-7.10346508 -3.81871247 -0.10899180
-7.10333252 -3.77917671 -0.29401371
-7.10300016 -3.93200016 0.07300000
-7.10300016 -3.92899990 0.07000000
-7.10300016 -3.82800007 -0.09000000
-7.10300016 -3.80200005 -0.16100000
-7.10300016 -3.78399992 -0.23899999
-7.10218811 -3.90510321 0.04100110
-7.10200739 -3.79000425 -0.44400051
-7.10200024 -3.78900003 -0.20800000
-7.10189676 -3.78394485 -0.24399640
-7.10174322 -3.86686015 -0.01299950
-7.10157251 -3.86104941 -0.02346450
-7.10141516 -3.81522298 -0.11900700
-7.10130358 -3.85816503 -0.02800120
-7.10125637 -3.87683368 0.00203920
-7.10105515 -3.82102990 -0.10400080
-7.10100079 -3.86400056 -0.01800000
-7.10099983 -3.91599989 0.05600000
-7.10099983 -3.81199980 -0.12600000
-7.10099983 -3.77699995 -0.33100000
-7.10099983 -3.77699995 -0.33399999
-7.10080957 -3.90378046 0.03901030
-7.10079098 -3.81735492 -0.11145710
-7.10041332 -3.93055010 0.07212510
-7.10029268 -3.78315592 -0.24601009
-7.09999990 -3.87800002 0.00400000
-7.09999990 -3.79099989 -0.19900000
-7.09923220 -3.92823291 0.07007070
-7.09899998 -3.91799998 0.05800000
-7.09899998 -3.78200030 -0.24800000
-7.09899998 -3.77699995 -0.31600001
-7.09899998 -3.77699995 -0.31900001
-7.09866142 -3.78320289 -0.23818910
-7.09860039 -3.81332231 -0.12201030
-7.09845877 -3.81426644 -0.11950840
-7.09840107 -3.81510949 -0.11605360
-7.09808111 -3.86239696 -0.01939360
-7.09800291 -3.79000139 -0.20100009
-7.09800005 -3.78699994 -0.21400000
-7.09763288 -3.77622294 -0.33214581
-7.09700012 -3.94600010 0.09000000
-7.09700012 -3.94300008 0.08700000
-7.09700012 -3.86999989 -0.00600000
-7.09700012 -3.79200006 -0.18799999
-7.09700012 -3.78099990 -0.25099999
-7.09630823 -3.81516552 -0.11400490
-7.09622669 -3.85512328 -0.03000100
-7.09617233 -3.86409402 -0.01500040
-7.09600019 -3.83200002 -0.07500000
-7.09600019 -3.80300021 -0.14800000
-7.09600019 -3.77699995 -0.28099999
-7.09598732 -3.86274099 -0.01749960
-7.09592199 -3.78895807 -0.20299770
-7.09583569 -3.78591180 -0.21599500
-7.09574270 -3.86086011 -0.02099920
-7.09516096 -3.81208658 -0.12400280
-7.09508705 -3.85804725 -0.02500030
-7.09508324 -3.77563453 -0.33210191
-7.09499979 -3.90199995 0.03800000
-7.09499979 -3.79699993 -0.16800000
-7.09485245 -3.77992129 -0.25599471
-7.09399986 -3.92699981 0.07000000
-7.09399986 -3.91199994 0.05300000
-7.09399986 -3.87500000 0.00200000
-7.09399986 -3.79099989 -0.19100000
-7.09399986 -3.78299999 -0.23600000
-7.09399986 -3.77600002 -0.28600001
-7.09364748 -3.78781176 -0.20598979
-7.09351349 -3.78527451 -0.21901590
-7.09334517 -3.83192110 -0.07387000
-7.09309483 -3.85615587 -0.02748010
-7.09299994 -3.87100005 -0.00400000
-7.09299994 -3.81599998 -0.10900000
-7.09299994 -3.79299998 -0.18099999
-7.09299994 -3.79299998 -0.47200000
-7.09296417 -3.81298089 -0.11699940
-7.09272337 -3.80185199 -0.15099411
-7.09234619 -3.78505111 -0.21670100
-7.09202766 -3.81001449 -0.12600049
-7.09200001 -3.91400003 0.05500000
-7.09200001 -3.78099990 -0.41499999
-7.09194183 -3.79596901 -0.17099860
-7.09183550 -3.78391242 -0.22099490
-7.09169912 -3.81208420 -0.12061120
-7.09132004 -3.85339642 -0.03156790
-7.09117842 -3.79057169 -0.18998030
-7.09108639 -3.86704707 -0.00800010
-7.09100008 -3.78699994 -0.20800000
-7.09099150 -3.79199529 -0.18399981
-7.09087610 -3.86093235 -0.01799970
-7.09032536 -3.78017330 -0.41301900
-7.09030485 -3.85816598 -0.02300100
-7.09028769 -3.79115391 -0.46901900
-7.09004641 -3.85502529 -0.02800020
-7.09000015 -3.83200002 -0.07200000
-7.09000015 -3.79699993 -0.16400000
-7.09000015 -3.78299999 -0.22400001
-7.09000015 -3.77399993 -0.35100001
-7.09000015 -3.77399993 -0.35699999
-7.08983183 -3.79990959 -0.15299641
-7.08969164 -3.77436805 -0.35403451
-7.08949089 -3.79426265 -0.17301200
-7.08925486 -3.81413698 -0.11200400
-7.08915281 -3.77577591 -0.28418639
-7.08912325 -3.81206584 -0.11900210
-7.08900023 -3.79099989 -0.18600000
-7.08900023 -3.77900004 -0.41000000
-7.08808994 -3.80804849 -0.12900160
-7.08799982 -3.94099998 0.08700000
-7.08799982 -3.80500007 -0.13600001
-7.08799982 -3.77300000 -0.32400000
-7.08799982 -3.77399993 -0.33100000
-7.08799982 -3.77399993 -0.33399999
-7.08799982 -3.77300000 -0.34099999
-7.08766651 -3.79542732 -0.16849840
-7.08744001 -3.79623580 -0.16601031
-7.08724213 -3.79012942 -0.46701601
-7.08713531 -3.79307246 -0.17600340
-7.08713150 -3.77281809 -0.33787480
-7.08703709 -3.86802053 -0.00600000
-7.08699989 -3.90799999 0.05000000
-7.08699989 -3.82200003 -0.09200000
-7.08699989 -3.78999996 -0.18900000
-7.08699989 -3.78500009 -0.21300000
-7.08699989 -3.77900004 -0.25099999
-7.08678532 -3.79842114 -0.15601730
-7.08637094 -3.79108477 -0.46996251
-7.08608198 -3.81004405 -0.12200140
-7.08600140 -3.85000062 -0.03500000
-7.08599997 -3.93099999 0.07700000
-7.08599997 -3.82999969 -0.07500000
-7.08599997 -3.80100012 -0.14900000
-7.08599997 -3.77500010 -0.28099999
-7.08577776 -3.77788162 -0.25599200
-7.08574677 -3.86450291 -0.01055750
-7.08574629 -3.81186318 -0.11399590
-7.08564711 -3.78381133 -0.21598920
-7.08556986 -3.77312899 -0.35267919
-7.08546352 -3.80371213 -0.13898949
-7.08539677 -3.85821581 -0.02100120
-7.08522558 -3.85512280 -0.02600080
-7.08514118 -3.85207653 -0.03000060
-7.08513165 -3.77864099 -0.41111550
-7.08510637 -3.79505682 -0.16800250
-7.08500004 -3.79200006 -0.17900001
-7.08488083 -3.78307414 -0.21913131
-7.08469009 -3.78883410 -0.46397969
-7.08463812 -3.80634308 -0.13101180
-7.08453798 -3.85645199 -0.02375100
-7.08422470 -3.79712057 -0.15800500
-7.08400011 -3.91000009 0.05300000
-7.08400011 -3.83100009 -0.07000000
-7.08400011 -3.81399989 -0.10900000
-7.08400011 -3.78900003 -0.19100000
-7.08400011 -3.78500009 -0.45100001
-7.08371258 -3.77226615 -0.33630130
-7.08313942 -3.80807519 -0.12400240
-7.08300018 -3.86899996 -0.00300000
-7.08300018 -3.82500005 -0.08200000
-7.08300018 -3.80200005 -0.14100000
-7.08300018 -3.77399993 -0.28600001
-7.08291149 -3.79186535 -0.17738380
-7.08290052 -3.79540300 -0.16423149
-7.08282375 -3.79010987 -0.18431769
-7.08281708 -3.79990172 -0.15099610
-7.08254957 -3.79375839 -0.17098910
-7.08248901 -3.85093045 -0.03183520
-7.08241367 -3.78722143 -0.46102691
-7.08233738 -3.78218055 -0.22101051
-7.08212948 -3.80460668 -0.13402140
-7.08199978 -3.82200003 -0.09000000
-7.08199978 -3.81599998 -0.10200000
-7.08199978 -3.80999994 -0.11700000
-7.08199978 -3.79600000 -0.16100000
-7.08199978 -3.79099989 -0.18099999
-7.08199978 -3.78399992 -0.44800001
-7.08199978 -3.79099989 -0.47099999
-7.08125687 -3.86514044 -0.00900030
-7.08125496 -3.79778194 -0.15412800
-7.08115816 -3.80691862 -0.12695760
-7.08113956 -3.84707594 -0.03800070
-7.08099985 -3.78099990 -0.22300000
-7.08099985 -3.77200007 -0.35900000
-7.08066368 -3.78982019 -0.18299130
-7.08035994 -3.81077862 -0.11420190
-7.08027363 -3.84822011 -0.03547130
-7.08014345 -3.79207683 -0.17300349
-7.08011580 -3.78606200 -0.45900750
-7.08008671 -3.86104727 -0.01300020
-7.08007574 -3.78904057 -0.46900499
-7.08002758 -3.77201486 -0.35600141
-7.08002138 -3.81201124 -0.11200030
-7.07999992 -3.91599989 0.06200000
-7.07999992 -3.90499997 0.04800000
-7.07999992 -3.79500008 -0.16300000
-7.07994699 -3.85597086 -0.02299980
-7.07994556 -3.84997010 -0.03299970
-7.07994223 -3.77796936 -0.41199660
-7.07977533 -3.85287786 -0.02799910
-7.07974958 -3.77193117 -0.35313350
-7.07946491 -3.80324960 -0.13600890
-7.07900000 -3.82900000 -0.07200000
-7.07900000 -3.81399989 -0.10500000
-7.07900000 -3.78900003 -0.18600000
-7.07900000 -3.77099991 -0.30300000
-7.07900000 -3.77099991 -0.30599999
-7.07900000 -3.77099991 -0.34900001
-7.07875013 -3.77686620 -0.40998551
-7.07859993 -3.82278395 -0.08499520
-7.07836246 -3.77119327 -0.34601769
-7.07800007 -3.91799998 0.06500000
-7.07800007 -3.81999993 -0.09200000
-7.07800007 -3.77099991 -0.31299999
-7.07800007 -3.77099991 -0.31600001
-7.07800007 -3.77099991 -0.32300001
-7.07800007 -3.77099991 -0.32600001
-7.07800007 -3.77099991 -0.34099999
-7.07800007 -3.78200030 -0.44299999
-7.07800007 -3.78500009 -0.45600000
-7.07799339 -3.79399657 -0.16599990
-7.07774210 -3.78786206 -0.46598300
-7.07771540 -3.77038097 -0.33303359
-7.07762909 -3.77133512 -0.33602989
-7.07752419 -3.77144980 -0.35744250
-7.07744074 -3.79623652 -0.15600970
-7.07738543 -3.79120636 -0.17600960
-7.07705164 -3.86602807 -0.00600000
-7.07704449 -3.77602363 -0.40700251
-7.07700014 -3.92600012 0.07400000
-7.07700014 -3.90599990 0.05000000
-7.07700014 -3.78500009 -0.19800000
-7.07699728 -3.80499840 -0.12899990
-7.07679701 -3.80902100 -0.11698430
-7.07624912 -3.81613421 -0.09900350
-7.07613373 -3.81007171 -0.11400210
-7.07601643 -3.78100848 -0.44000101
-7.07600021 -3.92899990 0.07700000
-7.07600021 -3.78699994 -0.18799999
-7.07600021 -3.77600002 -0.24800000
-7.07586145 -3.84492445 -0.03999920
-7.07585144 -3.79292011 -0.16799650
-7.07582951 -3.86190701 -0.01099970
-7.07581711 -3.84650970 -0.03629110
-7.07568884 -3.82335448 -0.08244050
-7.07564497 -3.78380990 -0.20098990
-7.07551575 -3.81317449 -0.10456560
-7.07542562 -3.91626859 0.06347930
-7.07512617 -3.77506781 -0.25100449
-7.07505131 -3.78702760 -0.46300340
-7.07499981 -3.85800004 -0.01600000
-7.07499981 -3.85500002 -0.02100000
-7.07499981 -3.78999996 -0.17800000
-7.07486725 -3.85292816 -0.02599950
-7.07479382 -3.79488945 -0.15799540
-7.07469559 -3.84983468 -0.03099870
-7.07466125 -3.78290176 -0.44984749
-7.07444429 -3.82203221 -0.08490510
-7.07439995 -3.82021618 -0.08700490
-7.07432508 -3.80170083 -0.13746130
-7.07414293 -3.80307674 -0.13100260
-7.07399988 -3.82900000 -0.07000000
-7.07399988 -3.78600001 -0.19100000
-7.07399988 -3.78299999 -0.20299999
-7.07398462 -3.77999187 -0.43799910
-7.07367182 -3.92541003 0.07414940
-7.07351351 -3.80027604 -0.14101020
-7.07299995 -3.82299995 -0.08200000
-7.07299995 -3.78800011 -0.18099999
-7.07299995 -3.77399993 -0.25500000
-7.07299995 -3.77099991 -0.37099999
-7.07299995 -3.77699995 -0.41999999
-7.07294941 -3.78497338 -0.46099669
-7.07276821 -3.81387472 -0.10199670
-7.07229948 -3.80816126 -0.11700490
-7.07200003 -3.94099998 0.09200000
-7.07200003 -3.79399991 -0.16100000
-7.07200003 -3.78200030 -0.44800001
-7.07199526 -3.77899766 -0.43499970
-7.07173014 -3.84284997 -0.04169840
-7.07168674 -3.78050780 -0.44184190
-7.07145643 -3.84951782 -0.02985380
-7.07141542 -3.80211878 -0.13349520
-7.07140779 -3.78573203 -0.18974800
-7.07134581 -3.77618456 -0.41702041
-7.07102156 -3.85794115 -0.01491130
-7.07100010 -3.89400005 0.03800000
-7.07088232 -3.84393620 -0.03799940
-7.07044363 -3.79823804 -0.14400899
-7.07029915 -3.78415990 -0.45801929
-7.07021666 -3.81811690 -0.09000280
-7.07000017 -3.94300008 0.09400000
-7.07000017 -3.91400003 0.06200000
-7.07000017 -3.82699990 -0.07200000
-7.07000017 -3.78699994 -0.18300000
-7.07000017 -3.76999998 -0.35800001
-7.07000017 -3.77500010 -0.41400000
-7.07000017 -3.77800012 -0.43200001
-7.06943941 -3.81325769 -0.10195530
-7.06931734 -3.81163144 -0.10399000
-7.06925869 -3.84714055 -0.03300120
-7.06899977 -3.89499998 0.04000000
-7.06899977 -3.76900005 -0.30500001
-7.06899977 -3.76900005 -0.31299999
-7.06899977 -3.76900005 -0.34299999
-7.06899977 -3.76900005 -0.34799999
-7.06885767 -3.82092309 -0.08499830
-7.06876659 -3.77487612 -0.40898660
-7.06842327 -3.80622816 -0.11900710
-7.06823158 -3.76912379 -0.33601099
-7.06799984 -3.92400002 0.07400000
-7.06799984 -3.85200000 -0.02300000
-7.06799984 -3.76900005 -0.33300000
-7.06799984 -3.77999997 -0.44299999
-7.06799984 -3.78299999 -0.45500001
-7.06791735 -3.79995584 -0.13599840
-7.06752348 -3.84174585 -0.04140220
-7.06739426 -3.79667473 -0.14598750
-7.06717110 -3.93845844 0.09057340
-7.06699991 -3.81399989 -0.09900000
-7.06699991 -3.77399993 -0.24800000
-7.06699991 -3.77399993 -0.40700001
-7.06684971 -3.78191948 -0.19999570
-7.06626081 -3.81614089 -0.09200340
-7.06604815 -3.83902621 -0.04500030
-7.06600571 -3.77900314 -0.44000041
-7.06599998 -3.78500009 -0.18799999
-7.06599998 -3.77600002 -0.42500001
-7.06544733 -3.84526849 -0.03430270
-7.06527567 -3.77722931 -0.43287730
-7.06514168 -3.81807661 -0.08700180
-7.06500006 -3.85599995 -0.01600000
-7.06500006 -3.85299993 -0.02100000
-7.06500006 -3.80399990 -0.12200000
-7.06487751 -3.79793429 -0.13899760
-7.06456041 -3.84730530 -0.03100250
-7.06450748 -3.77273679 -0.25298241
-7.06426191 -3.79514074 -0.14900550
-7.06401634 -3.77800894 -0.43700099
-7.06400013 -3.93600011 0.08900000
-7.06400013 -3.78399992 -0.19100000
-7.06400013 -3.78099990 -0.20299999
-7.06400013 -3.77500010 -0.23000000
-7.06400013 -3.77500010 -0.42199999
-7.06321764 -3.79710102 -0.14222850
-7.06306458 -3.80603504 -0.11700110
-7.06300020 -3.80000019 -0.13100000
-7.06300020 -3.78600001 -0.18099999
-7.06300020 -3.77200007 -0.25500000
-7.06300020 -3.76900005 -0.36800000
-7.06300020 -3.77500010 -0.41900000
-7.06299543 -3.81199741 -0.10199990
-7.06289673 -3.83803368 -0.04541700
-7.06273890 -3.81385875 -0.09499650
-7.06199980 -3.89200020 0.03700000
-7.06199980 -3.77399993 -0.23300000
-7.06198454 -3.77699161 -0.43499899
-7.06181908 -3.91930676 0.07129570
-7.06135035 -3.83919001 -0.04300210
-7.06113911 -3.83607554 -0.04800100
-7.06099987 -3.93800020 0.09100000
-7.06099987 -3.78500009 -0.18300000
-7.06099987 -3.77900004 -0.20500000
-7.06099987 -3.76799989 -0.28299999
-7.06099987 -3.77300000 -0.41400000
-7.06095743 -3.81597710 -0.08999950
-7.06086540 -3.79392767 -0.15099710
-7.06033993 -3.91718888 0.06900330
-7.06005573 -3.84403038 -0.03300030
-7.05999947 -3.77600002 -0.43200001
-7.05947924 -3.79825783 -0.13400909
-7.05934954 -3.80418849 -0.11900590
-7.05929995 -3.79418588 -0.14647441
-7.05913353 -3.84107304 -0.03800070
-7.05900002 -3.84999990 -0.02300000
-7.05900002 -3.82900000 -0.06000000
-7.05900002 -3.81199980 -0.09700000
-7.05900002 -3.80999994 -0.10400000
-7.05900002 -3.77800012 -0.20800000
-7.05900002 -3.77500010 -0.22300000
-7.05803490 -3.79501891 -0.14400069
-7.05782270 -3.79190421 -0.15399610
-7.05754709 -3.79837012 -0.13219529
-7.05733490 -3.77417898 -0.22601070
-7.05700016 -3.89200020 0.04000000
-7.05700016 -3.81699991 -0.08400000
-7.05685377 -3.77783751 -0.20666771
-7.05682850 -3.81390738 -0.09199780
-7.05665112 -3.83681011 -0.04499780
-7.05639458 -3.79247952 -0.15096530
-7.05600023 -3.80200005 -0.12200000
-7.05600023 -3.77300000 -0.22800000
-7.05600023 -3.77399993 -0.42399999
-7.05599403 -3.83399677 -0.05000000
-7.05595255 -3.79697442 -0.13599910
-7.05505419 -3.81270671 -0.09422920
-7.05504704 -3.79302526 -0.14600100
-7.05499983 -3.82699990 -0.06300000
-7.05494499 -3.84197021 -0.03599970
-7.05478907 -3.79042411 -0.15601750
-7.05439663 -3.83821607 -0.04100230
-7.05407524 -3.77374959 -0.22396210
-7.05399990 -3.89299989 0.04300000
-7.05399990 -3.77300000 -0.23100001
-7.05399990 -3.77300000 -0.42199999
-7.05355453 -3.77731061 -0.20600130
-7.05333996 -3.81518364 -0.08700420
-7.05299997 -3.91300011 0.06600000
-7.05299997 -3.84599996 -0.02600000
-7.05299997 -3.79800010 -0.13100000
-7.05299997 -3.79500008 -0.13900000
-7.05299997 -3.77999997 -0.19000000
-7.05299997 -3.76600003 -0.28000000
-7.05297327 -3.83456039 -0.04746070
-7.05218935 -3.91510439 0.06900190
-7.05217838 -3.78909588 -0.15800400
-7.05200005 -3.78299999 -0.17800000
-7.05200005 -3.77200007 -0.23300000
-7.05200005 -3.76600003 -0.28299999
-7.05143547 -3.83123684 -0.05300330
-7.05100012 -3.80500007 -0.10900000
-7.05100012 -3.77699995 -0.20500000
-7.05081034 -3.88889551 0.03799900
-7.05048704 -3.83872080 -0.03799720
-7.05033827 -3.77918148 -0.19300930
-7.05013466 -3.79607272 -0.13400251
-7.05000019 -3.81299996 -0.08900000
-7.05000019 -3.76999998 -0.23500000
-7.04994822 -3.77246976 -0.22613581
-7.04977131 -3.78787732 -0.16099480
-7.04965067 -3.83580995 -0.04299790
-7.04953909 -3.78128934 -0.18001381
-7.04939127 -3.79021049 -0.15100840
-7.04901409 -3.76400781 -0.29000059
-7.04899979 -3.82699990 -0.06000000
-7.04899979 -3.81800008 -0.07700000
-7.04899979 -3.80999994 -0.09700000
-7.04899979 -3.77600002 -0.20800000
-7.04899979 -3.77300000 -0.22300000
-7.04899979 -3.76399994 -0.29300001
-7.04885387 -3.83078122 -0.05263940
-7.04847574 -3.76925445 -0.23801610
-7.04824495 -3.84713387 -0.02400080
-7.04809141 -3.77804947 -0.19500250
-7.04799986 -3.88400006 0.03200000
-7.04799986 -3.81499982 -0.08500000
-7.04799986 -3.79200006 -0.14399999
-7.04799986 -3.78299999 -0.17299999
-7.04775238 -3.78586698 -0.16299430
-7.04752874 -3.88929200 0.04000300
-7.04734993 -3.80318880 -0.11100550
-7.04716587 -3.83209014 -0.05000120
-7.04701090 -3.77200651 -0.22500040
-7.04699993 -3.92699981 0.08400000
-7.04699993 -3.77999997 -0.18300000
-7.04699993 -3.77399993 -0.20999999
-7.04699421 -3.82899690 -0.05500000
-7.04694843 -3.78897262 -0.15399890
-7.04686642 -3.79492807 -0.13599740
-7.04667568 -3.88698363 0.03681470
-7.04600000 -3.76799989 -0.24300000
-7.04599333 -3.77699614 -0.19799981
-7.04586506 -3.88083768 0.02923020
-7.04563046 -3.83443141 -0.04395950
-7.04536057 -3.78513145 -0.16472620
-7.04531097 -3.83616900 -0.04100180
-7.04523468 -3.78212619 -0.17600590
-7.04514122 -3.79007578 -0.14600290
-7.04500675 -3.83300352 -0.04600000
-7.04500008 -3.90799999 0.06400000
-7.04500008 -3.88499999 0.03500000
-7.04500008 -3.82500005 -0.06200000
-7.04500008 -3.77099991 -0.22800000
-7.04500008 -3.76500010 -0.27000001
-7.04499245 -3.77299619 -0.21299981
-7.04452038 -3.78774261 -0.15598939
-7.04442644 -3.81623125 -0.08000490
-7.04408407 -3.84367418 -0.02685550
-7.04400444 -3.81300259 -0.08700010
-7.04400206 -3.87900090 0.02700000
-7.04400015 -3.92800021 0.08600000
-7.04400015 -3.80100012 -0.11400000
-7.04400015 -3.79299998 -0.13900000
-7.04400015 -3.77600002 -0.20000000
-7.04313803 -3.77207398 -0.21500421
-7.04305363 -3.82602859 -0.05800040
-7.04300022 -3.77800012 -0.19100000
-7.04300022 -3.76699996 -0.24800000
-7.04283571 -3.82891011 -0.05299880
-7.04276133 -3.78087187 -0.17799400
-7.04263210 -3.78333950 -0.16801509
-7.04259872 -3.92491412 0.08282180
-7.04204464 -3.78602386 -0.15900099
-7.04199982 -3.76300001 -0.27700001
-7.04199982 -3.76300001 -0.28000000
-7.04199982 -3.76300001 -0.38000000
-7.04186821 -3.78892946 -0.14799730
-7.04152250 -3.77127981 -0.21801621
-7.04146957 -3.88070774 0.02999770
-7.04118681 -3.80240178 -0.11076140
-7.04100275 -3.77700138 -0.19300009
-7.04099989 -3.88599992 0.03700000
-7.04099989 -3.76799989 -0.23500000
-7.04086494 -3.80086017 -0.11303940
-7.04083014 -3.78384376 -0.16595981
-7.04061842 -3.78233242 -0.17101499
-7.04054594 -3.81578159 -0.07831840
-7.04051399 -3.84466672 -0.02447310
-7.04043293 -3.81423450 -0.08200500
-7.04042959 -3.76311207 -0.38213021
-7.04026508 -3.77960539 -0.18098110
-7.04013014 -3.76758027 -0.23899400
-7.03999996 -3.81100011 -0.09000000
-7.03997803 -3.77298808 -0.44899860
-7.03994703 -3.83397126 -0.04299970
-7.03986168 -3.83092499 -0.04799910
-7.03976011 -3.76187205 -0.28499031
-7.03957129 -3.76177120 -0.28998241
-7.03900719 -3.77600431 -0.19500020
-7.03900003 -3.78699994 -0.15099999
-7.03893900 -3.78496718 -0.16099860
-7.03874445 -3.82386112 -0.05999780
-7.03850174 -3.78126931 -0.17301230
-7.03833961 -3.92218900 0.08100390
-7.03814030 -3.90592933 0.06361140
-7.03812838 -3.82586861 -0.05671710
-7.03812742 -3.77806878 -0.18300331
-7.03801107 -3.78209734 -0.16905589
-7.03800011 -3.90400028 0.06100000
-7.03800011 -3.88100004 0.03300000
-7.03800011 -3.87599993 0.02500000
-7.03800011 -3.86700010 0.01300000
-7.03800011 -3.78999996 -0.14399999
-7.03800011 -3.77200007 -0.44600001
-7.03799725 -3.84099841 -0.02900000
-7.03776693 -3.76687503 -0.23999199
-7.03753757 -3.87836099 0.02805230
-7.03733873 -3.80118299 -0.11200540
-7.03700018 -3.81199980 -0.08500000
-7.03700018 -3.77200007 -0.20999999
-7.03699303 -3.77499604 -0.19799981
-7.03689194 -3.76323175 -0.27055031
-7.03665447 -3.78281379 -0.16299200
-7.03633213 -3.77717853 -0.18500870
-7.03614092 -3.78007579 -0.17600350
-7.03599977 -3.80800009 -0.09200000
-7.03599977 -3.76500010 -0.24500000
-7.03579998 -3.78789282 -0.14599580
-7.03573275 -3.77203226 -0.44774991
-7.03561878 -3.90431571 0.06229290
-7.03560638 -3.82866120 -0.04994390
-7.03547239 -3.92370582 0.08299380
-7.03499985 -3.88199997 0.03500000
-7.03499985 -3.87700009 0.02700000
-7.03499985 -3.77600002 -0.18799999
-7.03499985 -3.77399993 -0.20000000
-7.03499985 -3.75900006 -0.30700001
-7.03499985 -3.75900006 -0.34000000
-7.03499699 -3.81399870 -0.08000000
-7.03459549 -3.83078003 -0.04599740
-7.03451109 -3.77073789 -0.21498510
-7.03433418 -3.75917840 -0.31001469
-7.03413391 -3.78052378 -0.17045870
-7.03403091 -3.82201648 -0.06300030
-7.03399992 -3.79900002 -0.11400000
-7.03399992 -3.76699996 -0.23000000
-7.03399992 -3.76500010 -0.24699999
-7.03399992 -3.76200008 -0.27300000
-7.03399992 -3.75900006 -0.31500000
-7.03399992 -3.76200008 -0.38299999
-7.03399992 -3.76500010 -0.40799999
-7.03399992 -3.76699996 -0.42600000
-7.03399897 -3.84199929 -0.02600000
-7.03395224 -3.78197432 -0.16599891
-7.03369522 -3.77883625 -0.17799230
-7.03362560 -3.81191707 -0.08385490
-7.03333092 -3.77973366 -0.17349529
-7.03309250 -3.82405019 -0.05800080
-7.03299999 -3.76399994 -0.25000000
-7.03299999 -3.76099992 -0.27700001
-7.03299999 -3.76099992 -0.38000000
-7.03287601 -3.76993346 -0.21699619
-7.03276968 -3.78687596 -0.14899510
-7.03250694 -3.92131233 0.08122510
-7.03215504 -3.86550355 0.01268580
-7.03200579 -3.76600313 -0.42300040
-7.03200006 -3.87199998 0.02200000
-7.03200006 -3.80599999 -0.09400000
-7.03200006 -3.79200006 -0.13100000
-7.03200006 -3.76600003 -0.23199999
-7.03200006 -3.76099992 -0.28000000
-7.03200006 -3.77200007 -0.45100001
-7.03175211 -3.78086662 -0.16799410
-7.03167200 -3.87943220 0.03210000
-7.03141737 -3.77722383 -0.18001071
-7.03100300 -3.81200171 -0.08200000
-7.03100014 -3.87700009 0.03000000
-7.03100014 -3.86299992 0.01000000
-7.03100014 -3.81699991 -0.07000000
-7.03100014 -3.76900005 -0.22000000
-7.03100014 -3.75999999 -0.37500000
-7.03100014 -3.75999999 -0.37799999
-7.03054571 -3.77557230 -0.18702421
-7.03020573 -3.81911206 -0.06500190
-7.03004837 -3.82502627 -0.05300040
-7.03003883 -3.77857471 -0.17477830
-7.03002071 -3.76501131 -0.42000121
-7.03000021 -3.91700029 0.07800000
-7.03000021 -3.90000010 0.05900000
-7.03000021 -3.79399991 -0.12400000
-7.03000021 -3.78500009 -0.15099999
-7.03000021 -3.76500010 -0.23700000
-7.03000021 -3.75999999 -0.28500000
-7.02987671 -3.77893400 -0.17099699
-7.02966642 -3.77135754 -0.44904259
-7.02925253 -3.82664657 -0.04975460
-7.02899981 -3.86500001 0.01300000
-7.02899981 -3.83899999 -0.02800000
-7.02899981 -3.78999996 -0.13400000
-7.02899981 -3.76699996 -0.22200000
-7.02899981 -3.76200008 -0.25500000
-7.02899981 -3.75900006 -0.36700001
-7.02889204 -3.77647924 -0.18302320
-7.02851725 -3.79113150 -0.13136840
-7.02842045 -3.82110262 -0.06184630
-7.02816486 -3.76420569 -0.24201150
-7.02809143 -3.76546931 -0.42355490
-7.02799988 -3.87899995 0.03200000
-7.02799988 -3.87299991 0.02500000
-7.02799988 -3.76399994 -0.41800001
-7.02799988 -3.76999998 -0.44600001
-7.02799988 -3.77500010 -0.47099999
-7.02796793 -3.78098273 -0.16299930
-7.02779293 -3.90132952 0.06098950
-7.02738953 -3.76656079 -0.22395641
-7.02718019 -3.82343745 -0.05448230
-7.02717733 -3.77809548 -0.17300440
-7.02705908 -3.75803185 -0.36200309
-7.02699947 -3.91899991 0.08000000
-7.02699947 -3.80999994 -0.08500000
-7.02699947 -3.79200006 -0.12600000
-7.02677679 -3.77541757 -0.18502051
-7.02657795 -3.77586246 -0.18077850
-7.02656126 -3.81781936 -0.06752950
-7.02616692 -3.80560923 -0.09324360
-7.02600002 -3.90899968 0.07100000
-7.02600002 -3.76300001 -0.24500000
-7.02600002 -3.75699997 -0.35499999
-7.02586317 -3.87083650 0.02265360
-7.02536297 -3.75719380 -0.35201821
-7.02532721 -3.77417517 -0.46902180
-7.02524996 -3.77531838 -0.18294860
-7.02519989 -3.86911011 0.02000060
-7.02513838 -3.82207513 -0.05600110
-7.02500010 -3.76500010 -0.22700000
-7.02500010 -3.75699997 -0.30700001
-7.02500010 -3.75699997 -0.34000000
-7.02491379 -3.76353621 -0.23887330
-7.02472639 -3.75685382 -0.30998799
-7.02468252 -3.77682924 -0.17599210
-7.02445650 -3.77424502 -0.18801220
-7.02444410 -3.89787531 0.05777180
-7.02400017 -3.90300012 0.06400000
-7.02400017 -3.87400031 0.02700000
-7.02400017 -3.86199999 0.01000000
-7.02400017 -3.76500010 -0.23000000
-7.02400017 -3.75699997 -0.31400001
-7.02400017 -3.75600004 -0.32699999
-7.02381754 -3.81524777 -0.07086900
-7.02349806 -3.81804609 -0.06433110
-7.02336550 -3.82411003 -0.05098810
-7.02310324 -3.77305579 -0.46600690
-7.02299976 -3.76500010 -0.42500001
-7.02258730 -3.81679153 -0.06730900
-7.02239752 -3.77521420 -0.17801011
-7.02206802 -3.77203655 -0.19000180
-7.02199984 -3.83200002 -0.03600000
-7.02199984 -3.82999969 -0.04100000
-7.02199984 -3.80399990 -0.09500000
-7.02199984 -3.78999996 -0.13100000
-7.02199984 -3.76399994 -0.23199999
-7.02199984 -3.75799990 -0.27200001
-7.02199984 -3.77500010 -0.47600001
-7.02181196 -3.89589548 0.05599850
-7.02167177 -3.76382399 -0.42198029
-7.02139759 -3.86921954 0.02200120
-7.02099991 -3.91300011 0.07600000
-7.02099991 -3.89800000 0.05900000
-7.02099991 -3.79200006 -0.12400000
-7.02099991 -3.75799990 -0.37500000
-7.02099991 -3.77200007 -0.46399999
-7.02041388 -3.90665197 0.06950580
-7.02040052 -3.77310252 -0.18688031
-7.02013969 -3.77407479 -0.18000360
-7.02007866 -3.82004285 -0.05800060
-7.01999998 -3.87500000 0.03000000
-7.01999998 -3.79399991 -0.11700000
-7.01999998 -3.76799989 -0.20500000
-7.01999998 -3.76300001 -0.23700000
-7.01999998 -3.75999999 -0.25500000
-7.01999998 -3.77399993 -0.47400001
-7.01993895 -3.82107663 -0.05471410
-7.01989889 -3.76294589 -0.41999391
-7.01973486 -3.75685787 -0.27698961
-7.01966667 -3.86675930 0.01910220
-7.01922703 -3.86512518 0.01700060
-7.01916599 -3.77108908 -0.19300459
-7.01900005 -3.78800011 -0.13400000
-7.01900005 -3.75699997 -0.36700001
-7.01853180 -3.81628895 -0.06500490
-7.01852703 -3.76475286 -0.22308581
-7.01828480 -3.75615215 -0.36401480
-7.01805496 -3.87278700 0.02777800
-7.01800060 -3.91400003 0.07800000
-7.01800060 -3.90499997 0.06800000
-7.01800060 -3.86999989 0.02500000
-7.01800060 -3.82999969 -0.03900000
-7.01800060 -3.78999996 -0.12700000
-7.01800060 -3.76200008 -0.23899999
-7.01800060 -3.76200008 -0.41700000
-7.01790953 -3.77295136 -0.18299760
-7.01788521 -3.82693696 -0.04299930
-7.01753664 -3.89596200 0.05719710
-7.01744270 -3.81278396 -0.07301500
-7.01727581 -3.91155338 0.07557250
-7.01701546 -3.89323401 0.05442080
-7.01700020 -3.90700030 0.07100000
-7.01700020 -3.89899993 0.06100000
-7.01700020 -3.80100012 -0.09700000
-7.01700020 -3.79200006 -0.11900000
-7.01700020 -3.76699996 -0.20700000
-7.01700020 -3.75600004 -0.28200001
-7.01700020 -3.75600004 -0.35900000
-7.01700020 -3.77800012 -0.49100000
-7.01677513 -3.76987910 -0.19499370
-7.01664448 -3.76380920 -0.22498859
-7.01599979 -3.87500000 0.03200000
-7.01599979 -3.83699989 -0.02400000
-7.01599979 -3.80599999 -0.08500000
-7.01599979 -3.75500011 -0.35400000
-7.01599979 -3.76300001 -0.43000001
-7.01599979 -3.77200007 -0.46900001
-7.01579571 -3.81876993 -0.05775120
-7.01574278 -3.81740427 -0.06000640
-7.01554060 -3.77175331 -0.18498790
-7.01552868 -3.82328773 -0.05100380
-7.01523399 -3.82985163 -0.03757620
-7.01509094 -3.81290793 -0.07121500
-7.01499987 -3.76300001 -0.22700000
-7.01499987 -3.75500011 -0.34900001
-7.01482058 -3.86590099 0.01999950
-7.01479626 -3.76842761 -0.19702239
-7.01452875 -3.87929249 0.03900290
-7.01449680 -3.86426997 0.01758070
-7.01416111 -3.77608705 -0.48901120
-7.01408482 -3.81404591 -0.06800080
-7.01400042 -3.77100015 -0.46599999
-7.01399994 -3.90799999 0.07300000
-7.01399994 -3.89100003 0.05300000
-7.01399994 -3.87100005 0.02700000
-7.01399994 -3.75399995 -0.32400000
-7.01397943 -3.76198888 -0.42799869
-7.01352692 -3.87374282 0.03113180
-7.01334000 -3.89418888 0.05600270
-7.01333523 -3.76717997 -0.20000960
-7.01320887 -3.83689928 -0.02338460
-7.01311541 -3.82506299 -0.04600080
-7.01301575 -3.75300860 -0.31900069
-7.01300001 -3.86199999 0.01500000
-7.01300001 -3.84999990 -0.00200000
-7.01300001 -3.82800007 -0.04100000
-7.01300001 -3.79900002 -0.09900000
-7.01300001 -3.75600004 -0.27200001
-7.01300001 -3.75399995 -0.32699999
-7.01300001 -3.77300000 -0.47600001
-7.01259947 -3.77078414 -0.18798929
-7.01205540 -3.83809304 -0.02133300
-7.01200438 -3.80400229 -0.08700010
-7.01200104 -3.77000022 -0.46300000
-7.01200008 -3.82999969 -0.03600000
-7.01200008 -3.76099992 -0.42500001
-7.01193047 -3.80950546 -0.07500990
-7.01187420 -3.81493139 -0.06299890
-7.01178455 -3.76688409 -0.20199379
-7.01154613 -3.82651258 -0.04260410
-7.01140785 -3.75521851 -0.27601609
-7.01118183 -3.76890540 -0.19003470
-7.01100016 -3.88100004 0.04200000
-7.01100016 -3.86700010 0.02200000
-7.01100016 -3.77200007 -0.17800000
-7.01100016 -3.75799990 -0.24900000
-7.01100016 -3.77500010 -0.48600000
-7.01085567 -3.82092118 -0.05299890
-7.01077795 -3.75488114 -0.27899119
-7.01063585 -3.79162216 -0.11749460
-7.01047754 -3.76713395 -0.19766749
-7.01000023 -3.90899968 0.07500000
-7.01000023 -3.75699997 -0.25200000
-7.01000023 -3.77200007 -0.47299999
-7.00997162 -3.81689525 -0.05798320
-7.00996304 -3.87849021 0.03914020
-7.00989199 -3.76594138 -0.20499679
-7.00977659 -3.81187868 -0.06999780
-7.00961590 -3.80944800 -0.07393020
-7.00900936 -3.77100468 -0.18000020
-7.00900030 -3.90300012 0.06800000
-7.00900030 -3.87100005 0.02900000
-7.00900030 -3.82200003 -0.04800000
-7.00895977 -3.85052729 0.00000000
-7.00879669 -3.82488918 -0.04399870
-7.00873852 -3.86240721 0.01700180
-7.00835180 -3.77469277 -0.48747289
-7.00821114 -3.76757574 -0.19297829
-7.00799990 -3.87599993 0.03600000
-7.00799990 -3.82800007 -0.03800000
-7.00799990 -3.80200005 -0.09000000
-7.00799990 -3.77300000 -0.17100000
-7.00799990 -3.75299978 -0.28600001
-7.00791740 -3.81295490 -0.06499920
-7.00785828 -3.86041284 0.01485440
-7.00778770 -3.87263250 0.03133430
-7.00734138 -3.84718752 -0.00500020
-7.00731087 -3.86633563 0.02313060
-7.00730085 -3.81561923 -0.05999400
-7.00713110 -3.80707121 -0.07800150
-7.00699997 -3.80399990 -0.08500000
-7.00699997 -3.79900002 -0.09700000
-7.00699997 -3.76999998 -0.18300000
-7.00699997 -3.77600002 -0.49100000
-7.00689888 -3.81794477 -0.05599920
-7.00677490 -3.85887575 0.01199960
-7.00672388 -3.75167990 -0.31799430
-7.00667667 -3.76682639 -0.19499101
-7.00634241 -3.83518720 -0.02400120
-7.00600052 -3.90400028 0.07100000
-7.00600052 -3.78999996 -0.11900000
-7.00600052 -3.77500010 -0.16100000
-7.00600052 -3.77200007 -0.17299999
-7.00600052 -3.75299978 -0.28900000
-7.00600052 -3.76099992 -0.43000001
-7.00599575 -3.76595998 -0.19861640
-7.00585890 -3.76770878 -0.19084831
-7.00557661 -3.75630736 -0.25127989
-7.00534916 -3.76318765 -0.21001050
-7.00533581 -3.80181551 -0.08913060
-7.00521231 -3.80857158 -0.07299180
-7.00518703 -3.86310315 0.02000050
-7.00514793 -3.77388310 -0.48635289
-7.00500011 -3.75999999 -0.22700000
-7.00453091 -3.87729383 0.03900300
-7.00416136 -3.77408671 -0.48901120
-7.00414658 -3.76448441 -0.20455331
-7.00400686 -3.77400351 -0.16300011
-7.00400019 -3.75099993 -0.29600000
-7.00400019 -3.75099993 -0.29899999
-7.00400019 -3.75099993 -0.35100001
-7.00400019 -3.75099993 -0.35400000
-7.00400019 -3.75999999 -0.42699999
-7.00399351 -3.80696225 -0.07602200
-7.00386810 -3.81092811 -0.06799870
-7.00377655 -3.82287788 -0.04599850
-7.00346994 -3.81371093 -0.06299520
-7.00325441 -3.84814000 -0.00200010
-7.00318432 -3.76209927 -0.21200560
-7.00313234 -3.85907292 0.01500030
-7.00302792 -3.75118709 -0.32092649
-7.00300217 -3.80500126 -0.08000000
-7.00299978 -3.79699993 -0.09900000
-7.00299978 -3.75099993 -0.31600001
-7.00275040 -3.81640911 -0.05800620
-7.00273752 -3.76325846 -0.20807131
-7.00266171 -3.80181599 -0.08699580
-7.00240660 -3.82129002 -0.04815990
-7.00234032 -3.76518297 -0.20000970
-7.00199986 -3.90499997 0.07300000
-7.00199986 -3.89000010 0.05600000
-7.00199986 -3.84400010 -0.00700000
-7.00199986 -3.76999998 -0.17800000
-7.00199986 -3.75900006 -0.23000000
-7.00199986 -3.75000000 -0.31099999
-7.00199986 -3.75000000 -0.32400000
-7.00199986 -3.75600004 -0.40400001
-7.00199986 -3.75900006 -0.42399999
-7.00199413 -3.77299714 -0.16599990
-7.00152254 -3.76128054 -0.21501601
-7.00145864 -3.75587916 -0.24979720
-7.00131178 -3.85759044 0.01318810
-7.00099993 -3.77300000 -0.48600000
-7.00083828 -3.85491109 0.00999980
-7.00081348 -3.86389709 0.02199940
-7.00058126 -3.76731277 -0.19001579
-7.00035000 -3.76418805 -0.20201010
-7.00000000 -3.86899996 0.02900000
-7.00000000 -3.84899998 0.00000000
-7.00000000 -3.77200007 -0.16800000
-7.00000000 -3.75500011 -0.25200000
-7.00000000 -3.75999999 -0.43700001
-6.99997187 -3.76109195 -0.21300019
-6.99966478 -3.76881933 -0.17999139
-6.99960089 -3.80878282 -0.07099590
-6.99949312 -3.90172148 0.07026590
-6.99935961 -3.80518699 -0.07657020
-6.99920034 -3.86026931 0.01751300
-6.99900007 -3.81999993 -0.04900000
-6.99900007 -3.79399991 -0.10200000
-6.99891663 -3.81095457 -0.06499920
-6.99886513 -3.80292654 -0.08299840
-6.99873686 -3.76285863 -0.20499229
-6.99873638 -3.76585817 -0.19299270
-6.99825716 -3.76178026 -0.20876560
-6.99802494 -3.88793850 0.05453870
-6.99802160 -3.75901151 -0.43400130
-6.99800014 -3.90000010 0.06800000
-6.99800014 -3.87400031 0.03700000
-6.99800014 -3.80000019 -0.09000000
-6.99800014 -3.79099989 -0.10900000
-6.99800014 -3.77399993 -0.16100000
-6.99800014 -3.77099991 -0.17100000
-6.99800014 -3.75099993 -0.28600001
-6.99764395 -3.75334501 -0.25702360
-6.99752760 -3.85573959 0.01199920
-6.99751139 -3.80298495 -0.08044720
-6.99735832 -3.84519649 -0.00500030
-6.99700022 -3.76799989 -0.18300000
-6.99700022 -3.75900006 -0.22200000
-6.99700022 -3.75099993 -0.28900000
-6.99599981 -3.79500008 -0.09700000
-6.99599981 -3.79200006 -0.10400000
-6.99599981 -3.76999998 -0.17299999
-6.99599981 -3.76399994 -0.19499999
-6.99599981 -3.75799990 -0.43200001
-6.99594498 -3.85333419 0.00896460
-6.99552298 -3.77274275 -0.16298890
-6.99539948 -3.80621767 -0.07300420
-6.99507380 -3.80125475 -0.08395590
-6.99499989 -3.88599992 0.05300000
-6.99499989 -3.75500011 -0.24200000
-6.99499989 -3.75200009 -0.26100001
-6.99499989 -3.75000000 -0.29600000
-6.99499464 -3.78899717 -0.11199990
-6.99476767 -3.80278611 -0.07797510
-6.99467850 -3.75268555 -0.25605270
-6.99430656 -3.84616852 -0.00200010
-6.99427128 -3.80814767 -0.06800260
-6.99424791 -3.85213637 0.00700020
-6.99407005 -3.76049995 -0.20997210
-6.99400759 -3.76300406 -0.19700021
-6.99400043 -3.90000010 0.07000000
-6.99400043 -3.74900007 -0.29899999
-6.99400043 -3.74900007 -0.35100001
-6.99400043 -3.74900007 -0.35400000
-6.99400043 -3.75399995 -0.41100001
-6.99382162 -3.75818253 -0.22175241
-6.99319315 -3.88741159 0.05504590
-6.99304724 -3.77102542 -0.16600110
-6.99300003 -3.75399995 -0.24400000
-6.99289894 -3.74794579 -0.30399561
-6.99268484 -3.80531716 -0.07408190
-6.99240780 -3.74821830 -0.30801791
-6.99233484 -3.75664282 -0.22897820
-6.99230242 -3.74816203 -0.31101340
-6.99202204 -3.75901198 -0.21200070
-6.99200010 -3.85599995 0.01500000
-6.99200010 -3.84200001 -0.00700000
-6.99200010 -3.79299998 -0.09900000
-6.99200010 -3.78699994 -0.11400000
-6.99200010 -3.74799991 -0.32300001
-6.99200010 -3.74799991 -0.32600001
-6.99199533 -3.76199746 -0.19999990
-6.99198008 -3.75298905 -0.40899879
-6.99143362 -3.85268760 0.00999920
-6.99109364 -3.75755787 -0.43288639
-6.99100018 -3.75299978 -0.24900000
-6.99065781 -3.79835773 -0.08700820
-6.99064875 -3.80577111 -0.07173650
-6.99044180 -3.80060887 -0.07997070
-6.99021578 -3.75811625 -0.21400660
-6.99015856 -3.75208545 -0.25200570
-6.99000740 -3.76100445 -0.20200020
-6.98999977 -3.83200002 -0.02200000
-6.98999977 -3.76999998 -0.16800000
-6.98999977 -3.75500011 -0.23199999
-6.98999977 -3.75000000 -0.37400001
-6.98999977 -3.75200009 -0.40599999
-6.98998117 -3.80362248 -0.07803330
-6.98899984 -3.79200006 -0.10200000
-6.98899984 -3.78900003 -0.10900000
-6.98848248 -3.84826541 0.00500030
-6.98843098 -3.75600433 -0.22454260
-6.98825932 -3.75700974 -0.21651690
-6.98820925 -3.79932380 -0.08162530
-6.98801422 -3.79823041 -0.08583880
-6.98799992 -3.85700011 0.01700000
-6.98799992 -3.78299999 -0.12400000
-6.98799992 -3.76500010 -0.18000001
-6.98799992 -3.75999999 -0.20500000
-6.98793888 -3.75096726 -0.25599781
-6.98787546 -3.79689932 -0.08843630
-6.98785877 -3.75323200 -0.24257921
-6.98699999 -3.75399995 -0.23700000
-6.98699999 -3.75699997 -0.43399999
-6.98693085 -3.80261898 -0.07781640
-6.98647785 -3.75071955 -0.25898060
-6.98639250 -3.85373116 0.01350200
-6.98630810 -3.75148678 -0.25094390
-6.98619461 -3.75610471 -0.22200620
-6.98618078 -3.78709793 -0.11200290
-6.98600006 -3.83800006 -0.01000000
-6.98600006 -3.79299998 -0.09700000
-6.98600006 -3.78999996 -0.10400000
-6.98600006 -3.76200008 -0.19499999
-6.98600006 -3.74699998 -0.28600001
-6.98600006 -3.74699998 -0.28900000
-6.98600006 -3.75299978 -0.41600001
-6.98572063 -3.80148101 -0.08003120
-6.98566437 -3.75203085 -0.40968391
-6.98564720 -3.76380968 -0.18299070
-6.98545790 -3.76105762 -0.19794780
-6.98520947 -3.80411339 -0.07300220
-6.98509502 -3.84905195 0.00700010
-6.98503780 -3.75302029 -0.24100129
-6.98500681 -3.78100348 -0.12600011
-6.98500013 -3.88400006 0.05300000
-6.98500013 -3.75000000 -0.26100001
-6.98480463 -3.75189495 -0.41398841
-6.98474646 -3.75486374 -0.22399190
-6.98466825 -3.89525700 0.06798700
-6.98465967 -3.82881331 -0.02399880
-6.98456287 -3.79645801 -0.08694740
-6.98400021 -3.74600005 -0.36100000
-6.98400021 -3.74900007 -0.39300001
-6.98393106 -3.75196314 -0.24399760
-6.98370838 -3.84631181 0.00367040
-6.98336267 -3.74619460 -0.35801861
-6.98317432 -3.79409456 -0.09200230
-6.98304367 -3.75644016 -0.21502329
-6.98301172 -3.74600625 -0.30300051
-6.98300934 -3.74600530 -0.30800039
-6.98299980 -3.89100003 0.06300000
-6.98299980 -3.78600001 -0.11400000
-6.98299980 -3.76300001 -0.18500000
-6.98291826 -3.74595666 -0.31099641
-6.98285294 -3.75192094 -0.41099140
-6.98273706 -3.75985861 -0.19999249
-6.98258686 -3.75431538 -0.22701910
-6.98235607 -3.74633741 -0.28824371
-6.98227310 -3.85315061 0.01500060
-6.98226833 -3.74814391 -0.38801491
-6.98218727 -3.75710082 -0.21200570
-6.98203087 -3.79486537 -0.08909120
-6.98199987 -3.79099989 -0.09900000
-6.98199987 -3.77900004 -0.12899999
-6.98199987 -3.74499989 -0.34599999
-6.98178434 -3.79679489 -0.08497300
-6.98145294 -3.75070596 -0.40796801
-6.98134851 -3.80164504 -0.07499300
-6.98110390 -3.75105572 -0.24900369
-6.98106670 -3.74703598 -0.38300371
-6.98099995 -3.78699994 -0.10700000
-6.98092222 -3.75895786 -0.20199780
-6.98084068 -3.75291419 -0.22899480
-6.98034239 -3.83518815 -0.01200060
-6.98019648 -3.79946804 -0.08022670
-6.98009062 -3.75604868 -0.21400280
-6.98000002 -3.82999969 -0.02200000
-6.98000002 -3.82100010 -0.03600000
-6.97985935 -3.84992242 0.00999980
-6.97982693 -3.79190588 -0.09499760
-6.97975206 -3.82674146 -0.02589230
-6.97974062 -3.74986029 -0.40598491
-6.97945881 -3.75215721 -0.23523150
-6.97900009 -3.90899968 0.08400000
-6.97900009 -3.78099990 -0.12400000
-6.97900009 -3.76399994 -0.18000001
-6.97900009 -3.75799990 -0.20500000
-6.97900009 -3.75200009 -0.23199999
-6.97868967 -3.79744935 -0.08412950
-6.97854757 -3.74875712 -0.40297380
-6.97851706 -3.91122198 0.08616860
-6.97847509 -3.85099435 0.01247020
-6.97824717 -3.84613609 0.00500020
-6.97810841 -3.88897920 0.06212830
-6.97800016 -3.88499999 0.05800000
-6.97800016 -3.75500011 -0.21699999
-6.97797203 -3.79435396 -0.08696230
-6.97792530 -3.74896002 -0.25599730
-6.97745657 -3.75060463 -0.24128000
-6.97725630 -3.84214091 0.00000000
-6.97717762 -3.79909658 -0.07800200
-6.97716761 -3.89138389 0.06579510
-6.97712803 -3.75106835 -0.23700429
-6.97700024 -3.89400005 0.06800000
-6.97700024 -3.74799991 -0.39800000
-6.97656107 -3.84353614 0.00231610
-6.97652340 -3.79101110 -0.09471800
-6.97640085 -3.76267672 -0.18298431
-6.97638226 -3.74965596 -0.24741560
-6.97632694 -3.74817562 -0.25901210
-6.97605324 -3.82638621 -0.02518040
-6.97599983 -3.83599997 -0.01000000
-6.97599983 -3.74499989 -0.28600001
-6.97566271 -3.77881765 -0.12599389
-6.97548962 -3.83389235 -0.01226170
-6.97548485 -3.75141788 -0.23133500
-6.97499990 -3.88700008 0.06000000
-6.97499990 -3.83200002 -0.01500000
-6.97499990 -3.81800008 -0.03900000
-6.97499990 -3.74699998 -0.26100001
-6.97499990 -3.74399996 -0.36000001
-6.97499990 -3.74699998 -0.39600000
-6.97499990 -3.75000000 -0.41299999
-6.97491693 -3.75295544 -0.22399740
-6.97461843 -3.74979496 -0.24098679
-6.97414160 -3.84607792 0.00700010
-6.97406054 -3.76103258 -0.18500160
-6.97399998 -3.74399996 -0.35499999
-6.97399998 -3.74699998 -0.39300001
-6.97398615 -3.79236078 -0.08996110
-6.97387791 -3.74844241 -0.25324410
-6.97360468 -3.88436365 0.05788240
-6.97334671 -3.79496121 -0.08521750
-6.97334194 -3.81899381 -0.03683650
-6.97332430 -3.84054351 -0.00093620
-6.97317648 -3.79418445 -0.08802750
-6.97300720 -3.74600387 -0.38800040
-6.97300005 -3.74300003 -0.29600000
-6.97299385 -3.75199676 -0.22699980
-6.97298670 -3.74899268 -0.24399950
-6.97273827 -3.79685736 -0.07999700
-6.97265482 -3.78781271 -0.09999510
-6.97262001 -3.74879575 -0.40797770
-6.97231197 -3.84217167 0.00200010
-6.97200823 -3.74600458 -0.38500050
-6.97200060 -3.83899999 -0.00300000
-6.97200012 -3.78500009 -0.10700000
-6.97200012 -3.77699995 -0.12899999
-6.97200012 -3.74300003 -0.34500000
-6.97200012 -3.74300003 -0.34799999
-6.97198868 -3.75899386 -0.18699969
-6.97154140 -3.83160233 -0.01444370
-6.97144222 -3.74823761 -0.24601559
-6.97100925 -3.75100470 -0.22900030
-6.97100115 -3.83300018 -0.01200000
-6.97100019 -3.74200010 -0.30800000
-6.97100019 -3.74200010 -0.31299999
-6.97100019 -3.74499989 -0.38000000
-6.97077513 -3.81748962 -0.03831950
-6.97075272 -3.74697948 -0.25639221
-6.97074509 -3.84685922 0.00999960
-6.97063923 -3.74180651 -0.34098229
-6.97017336 -3.79046297 -0.09196270
-6.96999979 -3.88100004 0.05500000
-6.96999979 -3.82399988 -0.02700000
-6.96999979 -3.76999998 -0.14800000
-6.96999979 -3.74399996 -0.27599999
-6.96999979 -3.74200010 -0.33800000
-6.96989870 -3.88405824 0.05801580
-6.96973991 -3.74685979 -0.25099060
-6.96963978 -3.84538889 0.00767900
-6.96952820 -3.88929510 0.06500490
-6.96938610 -3.75820851 -0.19001050
-6.96921110 -3.74711347 -0.40301219
-6.96902132 -3.79209948 -0.09002610
-6.96899986 -3.77500010 -0.13100000
-6.96899986 -3.75000000 -0.23199999
-6.96899986 -3.75500011 -0.45400000
-6.96892118 -3.88584089 0.06198150
-6.96874571 -3.78586197 -0.10199630
-6.96862650 -3.74333644 -0.27802500
-6.96839428 -3.79421473 -0.08300470
-6.96829319 -3.79297638 -0.08659540
-6.96813202 -3.84307289 0.00500010
-6.96799994 -3.78299999 -0.10900000
-6.96799994 -3.74600005 -0.40000001
-6.96791744 -3.74180651 -0.29634440
-6.96743774 -3.75723577 -0.19201210
-6.96733809 -3.74318171 -0.28101361
-6.96705008 -3.74602675 -0.25600180
-6.96682262 -3.78781629 -0.09497030
-6.96674490 -3.83585954 -0.00499980
-6.96638823 -3.83921385 0.00000000
-6.96600008 -3.82999969 -0.01500000
-6.96600008 -3.81599998 -0.03900000
-6.96600008 -3.75600004 -0.19499999
-6.96600008 -3.74499989 -0.25900000
-6.96599627 -3.74199820 -0.28599980
-6.96569443 -3.88550472 0.06203850
-6.96549654 -3.78572893 -0.09921660
-6.96542025 -3.84197092 0.00409570
-6.96512032 -3.78969789 -0.09204120
-6.96511793 -3.75906372 -0.18500310
-6.96500015 -3.74499989 -0.39500001
-6.96487904 -3.88234496 0.05844730
-6.96486855 -3.84392738 0.00699990
-6.96451139 -3.78427744 -0.10500770
-6.96445894 -3.74124646 -0.29001909
-6.96442032 -3.79120231 -0.08790920
-6.96424723 -3.74263549 -0.27531400
-6.96417236 -3.88123608 0.05594980
-6.96413326 -3.79207230 -0.08500160
-6.96400023 -3.74099970 -0.36300001
-6.96400023 -3.75200009 -0.44600001
-6.96383190 -3.74090910 -0.29299289
-6.96380043 -3.74226379 -0.27900779
-6.96299982 -3.79699993 -0.07300000
-6.96299982 -3.77200007 -0.13600001
-6.96299982 -3.76300001 -0.16300000
-6.96299982 -3.75999999 -0.17299999
-6.96299982 -3.74399996 -0.39300001
-6.96298647 -3.75699282 -0.18699960
-6.96287537 -3.74093294 -0.35999349
-6.96275663 -3.78413320 -0.10232940
-6.96259403 -3.85172796 0.02025510
-6.96252632 -3.88217783 0.05998730
-6.96229315 -3.74015760 -0.30001259
-6.96225595 -3.84014130 0.00200010
-6.96212149 -3.74006557 -0.30300531
-6.96209431 -3.74155259 -0.28389019
-6.96206856 -3.88015270 0.05501630
-6.96199989 -3.92899990 0.10800000
-6.96199989 -3.88499999 0.06200000
-6.96199989 -3.87700009 0.05300000
-6.96134472 -3.75534296 -0.19362999
-6.96113777 -3.78770709 -0.09504280
-6.96108532 -3.83304691 -0.00800010
-6.96103668 -3.74154496 -0.28011820
-6.96101761 -3.74000931 -0.34000081
-6.96101618 -3.74000859 -0.31000069
-6.96100044 -3.83600020 -0.00300000
-6.96099997 -3.79900002 -0.06800000
-6.96099997 -3.75900006 -0.17500000
-6.96099997 -3.74000001 -0.31299999
-6.96099997 -3.74000001 -0.34299999
-6.96099997 -3.75399995 -0.45600000
-6.96099424 -3.73999691 -0.35499969
-6.96096420 -3.75098062 -0.44299769
-6.96091461 -3.78195381 -0.10699870
-6.96050119 -3.73926902 -0.35202530
-6.96049213 -3.73872709 -0.32497630
-6.96029806 -3.75616050 -0.19000810
-6.96027803 -3.76115012 -0.16500659
-6.96027327 -3.74010897 -0.36057031
-6.96016502 -3.73908830 -0.32800779
-6.96009445 -3.73905087 -0.32000431
-6.96000004 -3.73900008 -0.33500001
-6.95987129 -3.78992987 -0.08699840
-6.95979786 -3.78844285 -0.09125260
-6.95960951 -3.78370070 -0.09996570
-6.95946598 -3.78256750 -0.10483710
-6.95901108 -3.77244139 -0.13201500
-6.95900011 -3.93000007 0.11000000
-6.95900011 -3.85200000 0.02100000
-6.95900011 -3.79500008 -0.07500000
-6.95900011 -3.74200010 -0.27300000
-6.95900011 -3.74399996 -0.40799999
-6.95900011 -3.75299978 -0.45300001
-6.95885944 -3.84092259 0.00499990
-6.95869875 -3.74083781 -0.27598810
-6.95855761 -3.74930048 -0.44103530
-6.95837069 -3.75077963 -0.44434011
-6.95814896 -3.73860812 -0.33113351
-6.95808411 -3.75504541 -0.19200230
-6.95800018 -3.76600003 -0.14800000
-6.95800018 -3.76300001 -0.15800001
-6.95800018 -3.74399996 -0.24900000
-6.95783901 -3.78718209 -0.09284220
-6.95766163 -3.74281788 -0.40498030
-6.95743752 -3.78532600 -0.09703400
-6.95738411 -3.76020789 -0.16800930
-6.95728779 -3.87477326 0.05148430
-6.95726156 -3.78014231 -0.10900410
-6.95709085 -3.79705000 -0.07100090
-6.95702362 -3.73954678 -0.28787661
-6.95683622 -3.77091146 -0.13399690
-6.95682955 -3.92781472 0.10828540
-6.95678282 -3.83688045 0.00000000
-6.95664024 -3.73911262 -0.35967061
-6.95663309 -3.73905993 -0.29505309
-6.95649195 -3.74826503 -0.43803099
-6.95642710 -3.74022985 -0.28101721
-6.95639753 -3.87910175 0.05792200
-6.95625639 -3.73910737 -0.29199919
-6.95599985 -3.87299991 0.05000000
-6.95599985 -3.75399995 -0.19400001
-6.95599985 -3.75099993 -0.44999999
-6.95593405 -3.74196482 -0.40199620
-6.95580244 -3.83201814 -0.00698950
-6.95575857 -3.73774099 -0.32377511
-6.95573330 -3.78785515 -0.08999660
-6.95566607 -3.78218699 -0.10195110
-6.95548916 -3.82971859 -0.00999930
-6.95548201 -3.73855090 -0.29765341
-6.95542145 -3.73780870 -0.31713960
-6.95536709 -3.75919843 -0.48302549
-6.95528984 -3.78435302 -0.09833720
-6.95519733 -3.76510668 -0.15100430
-6.95515013 -3.73908091 -0.28500611
-6.95499992 -3.88100004 0.06000000
-6.95499992 -3.84699988 0.01600000
-6.95499992 -3.76200008 -0.16000000
-6.95499992 -3.75900006 -0.17000000
-6.95499992 -3.74499989 -0.23600000
-6.95499992 -3.74699998 -0.43599999
-6.95499992 -3.75299978 -0.46000001
-6.95476389 -3.92529368 0.10648230
-6.95473242 -3.75814772 -0.17323311
-6.95472860 -3.87596369 0.05301320
-6.95400000 -3.77300000 -0.12600000
-6.95400000 -3.76999998 -0.13600001
-6.95400000 -3.76699996 -0.14300001
-6.95400000 -3.74399996 -0.23899999
-6.95400000 -3.74200010 -0.25600001
-6.95400000 -3.73799992 -0.36500001
-6.95400000 -3.75000000 -0.44800001
-6.95399761 -3.77799892 -0.11200000
-6.95378304 -3.73888326 -0.28999090
-6.95370150 -3.73729634 -0.32518771
-6.95358944 -3.78340888 -0.10003730
-6.95325422 -3.73754239 -0.32936010
-6.95322561 -3.79512310 -0.07300240
-6.95322418 -3.76312137 -0.15300490
-6.95316076 -3.78566289 -0.09322890
-6.95309448 -3.83705211 0.00200000
-6.95308590 -3.73804593 -0.29300371
-6.95300007 -3.92300034 0.10500000
-6.95300007 -3.81999993 -0.02500000
-6.95300007 -3.77500010 -0.11900000
-6.95300007 -3.76099992 -0.16300000
-6.95300007 -3.73799992 -0.36000001
-6.95300007 -3.75000000 -0.44499999
-6.95300007 -3.75799990 -0.48100001
-6.95298338 -3.75199103 -0.45799890
-6.95279551 -3.77992129 -0.10573380
-6.95277500 -3.87971520 0.05897670
-6.95275211 -3.74086618 -0.25799081
-6.95256805 -3.84776354 0.01772310
-6.95200014 -3.75399995 -0.18500000
-6.95197439 -3.73738170 -0.30185890
-6.95196104 -3.73797894 -0.35699800
-6.95163536 -3.74880338 -0.44297671
-6.95153141 -3.77797198 -0.10995550
-6.95150900 -3.87404060 0.05153270
-6.95139027 -3.73720980 -0.29801670
-6.95138454 -3.74020720 -0.26101440
-6.95102978 -3.83401656 -0.00300000
-6.95101738 -3.75100923 -0.45500109
-6.95100021 -3.92499995 0.10700000
-6.95100021 -3.80500007 -0.05100000
-6.95100021 -3.80200005 -0.05600000
-6.95100021 -3.79699993 -0.06800000
-6.95100021 -3.77099991 -0.12899999
-6.95100021 -3.76500010 -0.14600000
-6.95100021 -3.76200008 -0.15500000
-6.95100021 -3.75699997 -0.17500000
-6.95100021 -3.74000001 -0.39199999
-6.95100021 -3.74000001 -0.39500001
-6.95100021 -3.74200010 -0.41200000
-6.95097637 -3.79395437 -0.07468620
-6.95096588 -3.77598143 -0.11399940
-6.95075083 -3.73686624 -0.35198739
-6.95053577 -3.75929022 -0.16501270
-6.95052385 -3.74355221 -0.23807199
-6.95049858 -3.77127051 -0.52403760
-6.95047665 -3.77371573 -0.12099090
-6.95028973 -3.73615575 -0.31501311
-6.95024014 -3.73612928 -0.32001111
-6.95007753 -3.73741937 -0.36348051
-6.95006037 -3.82804346 -0.01114230
-6.95000029 -3.83000016 -0.00800000
-6.94999981 -3.80999994 -0.04100000
-6.94999981 -3.75299978 -0.18700001
-6.94999981 -3.73900008 -0.38499999
-6.94999313 -3.78108430 -0.10202930
-6.94995260 -3.73651218 -0.34704760
-6.94986868 -3.74792886 -0.43999171
-6.94981861 -3.73644018 -0.32503831
-6.94977856 -3.73888111 -0.26599151
-6.94954729 -3.78354168 -0.09619870
-6.94944143 -3.73623753 -0.33202109
-6.94913292 -3.73607135 -0.34200650
-6.94909477 -3.73605084 -0.33500460
-6.94899988 -3.79299998 -0.07600000
-6.94899988 -3.76399994 -0.14800000
-6.94899988 -3.76099992 -0.15800001
-6.94899988 -3.74200010 -0.24800000
-6.94899988 -3.74200010 -0.40700001
-6.94899988 -3.75000000 -0.45300001
-6.94868374 -3.79464650 -0.07152800
-6.94857359 -3.77813649 -0.10694730
-6.94814157 -3.81707811 -0.02700060
-6.94812632 -3.75806832 -0.16800310
-6.94801474 -3.76311707 -0.15117680
-6.94799995 -3.77200007 -0.12400000
-6.94799995 -3.74099970 -0.25099999
-6.94799995 -3.74399996 -0.42500001
-6.94799995 -3.75799990 -0.48600000
-6.94793320 -3.77594090 -0.11260240
-6.94784784 -3.87380028 0.05498300
-6.94783688 -3.74691200 -0.43698981
-6.94781351 -3.87201071 0.05001310
-6.94764090 -3.83404899 -0.00025580
-6.94753790 -3.77429199 -0.11700910
-6.94741201 -3.83279920 -0.00255530
-6.94700003 -3.87700009 0.05700000
-6.94700003 -3.80000019 -0.05800000
-6.94700003 -3.74900007 -0.44999999
-6.94700003 -3.76799989 -0.52100003
-6.94687653 -3.74093342 -0.40199280
-6.94676828 -3.73569679 -0.32346159
-6.94663572 -3.74280405 -0.42297789
-6.94663239 -3.80234623 -0.05300480
-6.94642162 -3.76966000 -0.52321780
-6.94603395 -3.78035879 -0.10062070
-6.94600010 -3.75999999 -0.16000000
-6.94600010 -3.75699997 -0.17000000
-6.94600010 -3.74600005 -0.21900000
-6.94600010 -3.74300003 -0.23700000
-6.94600010 -3.74499989 -0.43500000
-6.94600010 -3.75699997 -0.48300001
-6.94600010 -3.77099991 -0.52600002
-6.94588614 -3.82993674 -0.00499990
-6.94522476 -3.80712318 -0.04400140
-6.94500017 -3.77099991 -0.12600000
-6.94500017 -3.76500010 -0.14300001
-6.94500017 -3.74000001 -0.25600001
-6.94500017 -3.74200010 -0.41999999
-6.94500017 -3.74799991 -0.44700000
-6.94500017 -3.75099993 -0.46000001
-6.94500017 -3.77600002 -0.54200000
-6.94490051 -3.73523545 -0.33369780
-6.94457245 -3.77613664 -0.10894620
-6.94438982 -3.78085661 -0.09839320
-6.94434166 -3.82718825 -0.01000050
-6.94417858 -3.77309728 -0.11900310
-6.94407082 -3.75209761 -0.18552360
-6.94399977 -3.81800008 -0.02500000
-6.94399977 -3.74200010 -0.23899999
-6.94399977 -3.73600006 -0.36700001
-6.94399977 -3.73900008 -0.39500001
-6.94394350 -3.73596954 -0.28799760
-6.94388199 -3.79293561 -0.07299880
-6.94357300 -3.77134132 -0.12286280
-6.94351196 -3.82428193 -0.01500110
-6.94350386 -3.73627114 -0.36402640
-6.94347763 -3.76125884 -0.15301050
-6.94346809 -3.77327394 -0.11570420
-6.94323492 -3.75012708 -0.45801550
-6.94299984 -3.73900008 -0.39199999
-6.94285870 -3.81492233 -0.02999940
-6.94260931 -3.73878956 -0.25998539
-6.94254398 -3.77783990 -0.10702380
-6.94230127 -3.82860494 -0.00595520
-6.94228220 -3.80015421 -0.05600230
-6.94199991 -3.80300021 -0.05100000
-6.94199991 -3.76900005 -0.12899999
-6.94199991 -3.76300001 -0.14600000
-6.94199991 -3.74600005 -0.20900001
-6.94199991 -3.73499990 -0.29300001
-6.94199991 -3.74099970 -0.41200000
-6.94199991 -3.74600005 -0.44499999
-6.94173765 -3.74885821 -0.45498279
-6.94154406 -3.73775434 -0.26298279
-6.94115829 -3.76725984 -0.52157420
-6.94113159 -3.77152848 -0.12198470
-6.94108629 -3.77404666 -0.53900659
-6.94099998 -3.75999999 -0.15500000
-6.94099998 -3.73799992 -0.38699999
-6.94099712 -3.77436733 -0.11195160
-6.94097090 -3.82998371 -0.00300000
-6.94096756 -3.73440218 -0.33532611
-6.94066429 -3.74481869 -0.21098980
-6.94058561 -3.87095404 0.05294190
-6.94047976 -3.77810001 -0.10293280
-6.94020319 -3.80511165 -0.04600130
-6.94017887 -3.73409629 -0.34700891
-6.94014740 -3.77853608 -0.09998770
-6.94011497 -3.73406172 -0.32200530
-6.94001627 -3.73400855 -0.35000080
-6.94000006 -3.87299991 0.05500000
-6.94000006 -3.80800009 -0.04200000
-6.94000006 -3.75600004 -0.16500001
-6.94000006 -3.75099993 -0.18700001
-6.94000006 -3.73399997 -0.35499999
-6.94000006 -3.73699999 -0.38400000
-6.94000006 -3.74499989 -0.44200000
-6.94000006 -3.74799991 -0.45199999
-6.93996239 -3.82697868 -0.00800000
-6.93980789 -3.73389673 -0.32499099
-6.93946171 -3.77523708 -0.54228842
-6.93929100 -3.73415661 -0.34201440
-6.93914223 -3.81507778 -0.02700060
-6.93911409 -3.77615047 -0.10903320
-6.93901205 -3.73300648 -0.31700060
-6.93900061 -3.82399988 -0.01300000
-6.93900061 -3.73400021 -0.33700001
-6.93900013 -3.73699999 -0.26800001
-6.93900013 -3.73300004 -0.30500001
-6.93900013 -3.73300004 -0.31200001
-6.93900013 -3.74200010 -0.42399999
-6.93895006 -3.73397326 -0.33199760
-6.93890619 -3.74394941 -0.21399710
-6.93836880 -3.76965737 -0.12398870
-6.93825579 -3.82114100 -0.01800070
-6.93800020 -3.79800010 -0.05800000
-6.93800020 -3.75200009 -0.17700000
-6.93795443 -3.81197476 -0.03199980
-6.93762779 -3.80079579 -0.05399710
-6.93754196 -3.77062297 -0.12097090
-6.93734884 -3.77218962 -0.53602690
-6.93732262 -3.74117398 -0.42201960
-6.93710899 -3.77295828 -0.11264870
-6.93699980 -3.75500011 -0.16800000
-6.93699980 -3.74900007 -0.18900000
-6.93699980 -3.74300003 -0.21600001
-6.93699980 -3.73799992 -0.25099999
-6.93699980 -3.76600003 -0.52100003
-6.93665504 -3.74493003 -0.20900621
-6.93653011 -3.77674389 -0.10199310
-6.93599987 -3.80200005 -0.04900000
-6.93599987 -3.74000001 -0.41900000
-6.93580103 -3.80489111 -0.04399870
-6.93573380 -3.75085592 -0.17999309
-6.93553829 -3.77466440 -0.10970120
-6.93548632 -3.73726225 -0.25301781
-6.93522787 -3.74345279 -0.21361230
-6.93521547 -3.76811695 -0.12600391
-6.93508673 -3.82583213 -0.00766380
-6.93507195 -3.77049589 -0.11698440
-6.93499994 -3.76200008 -0.14100000
-6.93499994 -3.73399997 -0.28500000
-6.93468904 -3.74783182 -0.19199140
-6.93464375 -3.82735515 -0.00500050
-6.93452358 -3.73628211 -0.25601929
-6.93450069 -3.77327251 -0.54203910
-6.93440676 -3.75457311 -0.16725050
-6.93408585 -3.82404733 -0.01000010
-6.93407106 -3.77091050 -0.53533030
-6.93400002 -3.73900008 -0.23800001
-6.93400002 -3.73399997 -0.36700001
-6.93399763 -3.77854323 -0.09701400
-6.93385887 -3.81292224 -0.02999940
-6.93384695 -3.77236390 -0.53973061
-6.93376446 -3.73387289 -0.36398759
-6.93374491 -3.82085967 -0.01499940
-6.93369293 -3.73191595 -0.31471711
-6.93354654 -3.73375559 -0.28998101
-6.93349743 -3.79827261 -0.05600400
-6.93341684 -3.73198509 -0.31927481
-6.93340445 -3.81767201 -0.01999830
-6.93325615 -3.75013828 -0.18200670
-6.93302774 -3.77501512 -0.10400040
-6.93300009 -3.74099970 -0.22400001
-6.93300009 -3.73600006 -0.26100001
-6.93291378 -3.80895257 -0.03499960
-6.93242168 -3.77240109 -0.11249540
-6.93233252 -3.73817921 -0.24101160
-6.93207979 -3.74704289 -0.19400220
-6.93200016 -3.75200009 -0.17200001
-6.93200016 -3.74399996 -0.20900001
-6.93200016 -3.74399996 -0.44499999
-6.93182611 -3.76590538 -0.12899670
-6.93171692 -3.76930261 -0.11897800
-6.93149042 -3.76326609 -0.13600960
-6.93132687 -3.73517561 -0.26601249
-6.93105793 -3.76739812 -0.12323650
-6.93101120 -3.73200607 -0.34900060
-6.93100309 -3.74000168 -0.22600010
-6.93100023 -3.74900007 -0.18400000
-6.93100023 -3.73699999 -0.24300000
-6.93100023 -3.73200011 -0.29499999
-6.93100023 -3.73200011 -0.35400000
-6.93077278 -3.80287528 -0.04699850
-6.93063927 -3.76780343 -0.53097242
-6.93053007 -3.81013942 -0.03232640
-6.93040180 -3.75067616 -0.17498490
-6.93038559 -3.73120785 -0.30001670
-6.93029642 -3.74316001 -0.21200910
-6.93028450 -3.73641610 -0.25127560
-6.93021107 -3.77111459 -0.53901643
-6.93000078 -3.75400043 -0.16500001
-6.92999983 -3.73200011 -0.30500001
-6.92999983 -3.74300003 -0.44200000
-6.92996216 -3.77297950 -0.10699940
-6.92990875 -3.77649570 -0.09901300
-6.92979860 -3.81656456 -0.02039900
-6.92904520 -3.77199888 -0.11097500
-6.92901134 -3.73900628 -0.22800040
-6.92899990 -3.76999998 -0.11400000
-6.92899990 -3.75900006 -0.14600000
-6.92899990 -3.75600004 -0.15500000
-6.92899990 -3.73399997 -0.26800001
-6.92899990 -3.73099995 -0.31200001
-6.92883778 -3.76736832 -0.12097970
-6.92875814 -3.82386661 -0.00799970
-6.92864799 -3.76235175 -0.13801290
-6.92864466 -3.73080897 -0.31698370
-6.92864132 -3.74234629 -0.21401981
-6.92860270 -3.77041602 -0.11704400
-6.92846012 -3.76424956 -0.13100870
-6.92835617 -3.74965167 -0.17698359
-6.92825603 -3.82114100 -0.01300050
-6.92817068 -3.81809378 -0.01800040
-6.92799997 -3.73300004 -0.27300000
-6.92799997 -3.73000002 -0.33199999
-6.92791510 -3.81495309 -0.02299970
-6.92779112 -3.80588531 -0.03699890
-6.92731190 -3.75316906 -0.16700751
-6.92729998 -3.74716210 -0.18900821
-6.92717123 -3.74109244 -0.21600540
-6.92700005 -3.78099990 -0.08800000
-6.92700005 -3.75500011 -0.15800001
-6.92700005 -3.74399996 -0.20100001
-6.92700005 -3.73799992 -0.23100001
-6.92700005 -3.73600006 -0.25000000
-6.92690849 -3.76595044 -0.52799302
-6.92690563 -3.76806641 -0.53341991
-6.92682838 -3.73725438 -0.23912370
-6.92678118 -3.82174826 -0.00981170
-6.92667532 -3.77182341 -0.10899490
-6.92660522 -3.75778580 -0.14799160
-6.92625666 -3.76913953 -0.53601980
-6.92616081 -3.77508783 -0.10200240
-6.92615032 -3.76008129 -0.14100310
-6.92603731 -3.73502016 -0.25300139
-6.92600012 -3.80000019 -0.04900000
-6.92600012 -3.73200011 -0.27800000
-6.92600012 -3.73200011 -0.37900001
-6.92599821 -3.74899936 -0.18000001
-6.92584944 -3.76537442 -0.12397940
-6.92581654 -3.76853275 -0.11904840
-6.92579222 -3.76282549 -0.13260239
-6.92569876 -3.73983717 -0.21899050
-6.92523909 -3.74612927 -0.19200660
-6.92516088 -3.75108695 -0.17000391
-6.92500019 -3.74300003 -0.20400000
-6.92475939 -3.76395392 -0.12844031
-6.92453003 -3.77283001 -0.10507660
-6.92441940 -3.75622749 -0.15000910
-6.92438078 -3.73420548 -0.25801420
-6.92437363 -3.73838735 -0.22690789
-6.92422485 -3.80712390 -0.03500110
-6.92418814 -3.77610302 -0.09700260
-6.92403221 -3.74801731 -0.18200080
-6.92400503 -3.77000284 -0.11200010
-6.92400408 -3.77900290 -0.09000010
-6.92399979 -3.73900008 -0.22100000
-6.92399979 -3.73699999 -0.23800001
-6.92399979 -3.74200010 -0.44900000
-6.92399979 -3.75099993 -0.48400000
-6.92364407 -3.81432843 -0.02192000
-6.92356014 -3.76593709 -0.53003043
-6.92350721 -3.73073435 -0.28297979
-6.92335033 -3.81981611 -0.01197170
-6.92318773 -3.74510145 -0.19400530
-6.92300701 -3.76400375 -0.52500057
-6.92299986 -3.85200000 0.03500000
-6.92299986 -3.73000002 -0.37200001
-6.92291546 -3.81795359 -0.01499980
-6.92290878 -3.73595071 -0.24099679
-6.92281389 -3.78044438 -0.08501000
-6.92281151 -3.81244707 -0.02500290
-6.92275047 -3.76686478 -0.53298080
-6.92260838 -3.75032949 -0.17201510
-6.92253447 -3.76692343 -0.12206230
-6.92243052 -3.76123381 -0.13600840
-6.92240667 -3.76413393 -0.12597100
-6.92222548 -3.73012161 -0.36901200
-6.92217922 -3.75509739 -0.15300401
-6.92199993 -3.87700009 0.06600000
-6.92199993 -3.80900002 -0.03000000
-6.92199993 -3.74699998 -0.18500000
-6.92199993 -3.74399996 -0.19700000
-6.92199993 -3.73900008 -0.22400001
-6.92199993 -3.73000002 -0.28500000
-6.92199993 -3.73000002 -0.29499999
-6.92199993 -3.73799992 -0.43099999
-6.92199993 -3.77200007 -0.54799998
-6.92166662 -3.75165009 -0.16732800
-6.92140627 -3.72921872 -0.36402139
-6.92131329 -3.73516917 -0.24301100
-6.92111588 -3.72952366 -0.29996169
-6.92100000 -3.77699995 -0.09300000
-6.92100000 -3.75699997 -0.14500000
-6.92100000 -3.73200011 -0.26699999
-6.92100000 -3.73000002 -0.28999999
-6.92100000 -3.73499990 -0.41600001
-6.92100000 -3.74600005 -0.46900001
-6.92083931 -3.74945498 -0.48205841
-6.92067003 -3.72882199 -0.35898289
-6.92060614 -3.76878572 -0.11399350
-6.92034912 -3.74918938 -0.17500880
-6.92031384 -3.77417111 -0.10000450
-6.92020559 -3.77111149 -0.10700320
-6.92015743 -3.73902440 -0.21750700
-6.92014647 -3.75022531 -0.16941690
-6.92007017 -3.73703790 -0.42900431
-6.92000008 -3.83899999 0.01800000
-6.92000008 -3.75200009 -0.16500001
-6.92000008 -3.73200011 -0.39600000
-6.91980171 -3.73189282 -0.26999229
-6.91970682 -3.75438309 -0.15501580
-6.91964817 -3.73681021 -0.22898839
-6.91964340 -3.75980592 -0.13899280
-6.91958141 -3.77920127 -0.08785130
-6.91954422 -3.81679606 -0.01515720
-6.91946030 -3.73424816 -0.41402751
-6.91943693 -3.76532650 -0.12404370
-6.91939163 -3.76212549 -0.12897000
-6.91924810 -3.80513620 -0.03700130
-6.91910505 -3.76205707 -0.52200788
-6.91908121 -3.76283884 -0.52478600
-6.91905642 -3.73103023 -0.39100319
-6.91901588 -3.72800851 -0.31200069
-6.91901398 -3.72800732 -0.34900069
-6.91901350 -3.72800708 -0.34400061
-6.91900015 -3.73399997 -0.24500000
-6.91900015 -3.72799993 -0.31500000
-6.91900015 -3.72799993 -0.33199999
-6.91900015 -3.72799993 -0.35200000
-6.91900015 -3.74499989 -0.46599999
-6.91896391 -3.77101445 -0.54708248
-6.91894531 -3.81007123 -0.02800790
-6.91889238 -3.76058245 -0.13370250
-6.91887903 -3.74747610 -0.47906089
-6.91887236 -3.73993087 -0.21399599
-6.91849041 -3.76472259 -0.52996087
-6.91845036 -3.74770212 -0.17698590
-6.91840696 -3.73321986 -0.41102421
-6.91835928 -3.73619390 -0.42602211
-6.91820574 -3.75611162 -0.14800440
-6.91820383 -3.73809505 -0.21981420
-6.91808701 -3.73104692 -0.38600489
-6.91800022 -3.78399992 -0.07600000
-6.91800022 -3.75299978 -0.15800001
-6.91800022 -3.74200010 -0.20100001
-6.91800022 -3.73600006 -0.23100001
-6.91788149 -3.76993537 -0.54499060
-6.91781425 -3.80144787 -0.04200490
-6.91778135 -3.75088143 -0.16699471
-6.91764355 -3.81235456 -0.02300210
-6.91761541 -3.80633879 -0.03200280
-6.91755819 -3.81530809 -0.01800150
-6.91722536 -3.73012161 -0.27500901
-6.91720963 -3.73911309 -0.21600650
-6.91720629 -3.76711249 -0.11700350
-6.91699982 -3.84299994 0.02500000
-6.91699982 -3.73499990 -0.42399999
-6.91699982 -3.74099970 -0.45400000
-6.91699982 -3.74699998 -0.47600001
-6.91697836 -3.75798821 -0.14099960
-6.91664982 -3.73235035 -0.40603811
-6.91664696 -3.84835958 0.03200300
-6.91657162 -3.76339912 -0.12604690
-6.91652298 -3.75901508 -0.13745290
-6.91651392 -3.81717992 -0.01299720
-6.91634750 -3.80988955 -0.02593640
-6.91621304 -3.87561607 0.06573860
-6.91614103 -3.74707627 -0.17900370
-6.91607237 -3.73003888 -0.28000289
-6.91606140 -3.74403334 -0.19200170
-6.91602945 -3.77201581 -0.10200040
-6.91599989 -3.85400009 0.04000000
-6.91599989 -3.74099970 -0.20400000
-6.91599989 -3.73000002 -0.37599999
-6.91599989 -3.73000002 -0.37900001
-6.91599989 -3.73200011 -0.40300000
-6.91584301 -3.74891496 -0.16999610
-6.91575336 -3.73786664 -0.21799220
-6.91560698 -3.75478697 -0.14999150
-6.91536903 -3.76020074 -0.52002782
-6.91514254 -3.80207849 -0.03900080
-6.91512585 -3.77706885 -0.09000160
-6.91505337 -3.76153874 -0.52456850
-6.91500092 -3.84936953 0.03432480
-6.91499996 -3.78200030 -0.07800000
-6.91499996 -3.77900004 -0.08500000
-6.91499996 -3.72900009 -0.28400001
-6.91499996 -3.72900009 -0.37099999
-6.91499996 -3.74000001 -0.45100001
-6.91499996 -3.74900007 -0.48400000
-6.91499996 -3.75099993 -0.49399999
-6.91470957 -3.80794096 -0.03000740
-6.91429520 -3.75616002 -0.14300610
-6.91421795 -3.74311805 -0.19400610
-6.91417265 -3.79909492 -0.04400110
-6.91408587 -3.76504683 -0.11900150
-6.91400003 -3.87299991 0.06300000
-6.91400003 -3.74499989 -0.18200000
-6.91400003 -3.73699999 -0.22100000
-6.91400003 -3.73099995 -0.39600000
-6.91400003 -3.73399997 -0.41600001
-6.91400003 -3.74000001 -0.44800001
-6.91383171 -3.76040125 -0.52238190
-6.91381407 -3.76489902 -0.53498560
-6.91375875 -3.84386635 0.02799900
-6.91369963 -3.83538795 0.01500150
-6.91367102 -3.77534819 -0.09205090
-6.91360044 -3.80868268 -0.02695920
-6.91347218 -3.80425978 -0.03500240
-6.91341829 -3.75914001 -0.13396940
-6.91341114 -3.76176763 -0.12902629
-6.91339731 -3.72821426 -0.36602101
-6.91335392 -3.76210427 -0.52787429
-6.91324663 -3.74813342 -0.17200610
-6.91315317 -3.75308275 -0.15300339
-6.91300011 -3.86599994 0.05600000
-6.91300011 -3.82399988 -0.00100000
-6.91300011 -3.73900008 -0.20600000
-6.91300011 -3.75000000 -0.49200001
-6.91297197 -3.81198382 -0.01999990
-6.91284227 -3.72791505 -0.36299169
-6.91282558 -3.76307154 -0.12320190
-6.91279364 -3.74788785 -0.48098561
-6.91263485 -3.84740257 0.03276930
-6.91251040 -3.72773576 -0.28897950
-6.91249752 -3.73026848 -0.39302829
-6.91247702 -3.73325753 -0.24301679
-6.91246319 -3.81399846 -0.01792500
-6.91245413 -3.75910759 -0.51940590
-6.91223717 -3.73312807 -0.41401419
-6.91222477 -3.75812244 -0.51701689
-6.91216755 -3.77009153 -0.10500250
-6.91207790 -3.72704196 -0.29200330
-6.91200018 -3.89100003 0.08500000
-6.91200018 -3.87500000 0.06600000
-6.91200018 -3.74399996 -0.18400000
-6.91200018 -3.74099970 -0.19700000
-6.91200018 -3.73600006 -0.43099999
-6.91200018 -3.74399996 -0.46900001
-6.91200018 -3.76999998 -0.54799998
-6.91189480 -3.72694325 -0.35799459
-6.91169214 -3.75538778 -0.14364080
-6.91158581 -3.81421947 -0.01499690
-6.91138983 -3.87291360 0.06366620
-6.91133881 -3.84018826 0.02300110
-6.91117525 -3.80646062 -0.03144620
-6.91116476 -3.85175228 0.03900360
-6.91105127 -3.76302814 -0.12100090
-6.91099977 -3.83699989 0.01800000
-6.91099977 -3.82800007 0.00600000
-6.91099977 -3.79699993 -0.04700000
-6.91099977 -3.73200011 -0.24600001
-6.91099977 -3.76300001 -0.53200001
-6.91099787 -3.77199888 -0.10000000
-6.91098404 -3.72999144 -0.39099911
-6.91087484 -3.73193264 -0.41099259
-6.91077948 -3.74588060 -0.47898471
-6.91076946 -3.75733113 -0.13597579
-6.91073942 -3.77685761 -0.08799670
-6.91072035 -3.76149344 -0.12660590
-6.91065788 -3.79981232 -0.04199790
-6.91054487 -3.75229621 -0.15501221
-6.91049290 -3.84527421 0.03000210
-6.91048002 -3.75624609 -0.14095861
-6.91045141 -3.85313630 0.04199060
-6.91027594 -3.85015345 0.03700150
-6.91010380 -3.76014495 -0.13103990
-6.91010237 -3.72905540 -0.38800579
-6.91010189 -3.73505497 -0.42800629
-6.90999985 -3.80200005 -0.03700000
-6.90999985 -3.73699999 -0.21100000
-6.90999985 -3.73499990 -0.22600000
-6.90999985 -3.72600007 -0.35100001
-6.90999985 -3.74300003 -0.46599999
-6.90999985 -3.76500010 -0.54000002
-6.90950298 -3.78179336 -0.07604300
-6.90949488 -3.84210134 0.02645230
-6.90936089 -3.72619486 -0.34801820
-6.90932608 -3.73117638 -0.40801930
-6.90926790 -3.81614804 -0.01300050
-6.90901566 -3.72600842 -0.31100070
-6.90899992 -3.74000001 -0.19900000
-6.90899992 -3.72600007 -0.31400001
-6.90899992 -3.72600007 -0.34099999
-6.90899992 -3.74000001 -0.45300001
-6.90898323 -3.72599101 -0.34399921
-6.90892220 -3.76795721 -0.54499388
-6.90888023 -3.75693488 -0.51399112
-6.90866899 -3.82081699 -0.00299990
-6.90865946 -3.73381615 -0.22798879
-6.90865850 -3.80681205 -0.02799860
-6.90859985 -3.76832700 -0.10700930
-6.90832758 -3.73417711 -0.42602021
-6.90818310 -3.75309944 -0.14800391
-6.90813732 -3.76107478 -0.12400250
-6.90801668 -3.72500920 -0.33600080
-6.90799999 -3.88400006 0.07800000
-6.90799999 -3.72799993 -0.27500001
-6.90799999 -3.72799993 -0.38299999
-6.90799999 -3.74499989 -0.47600001
-6.90784931 -3.84591579 0.03299930
-6.90782213 -3.75581574 -0.13795650
-6.90781212 -3.83245039 0.01300150
-6.90777349 -3.80987501 -0.02299920
-6.90758896 -3.73077798 -0.40597579
-6.90741920 -3.81267953 -0.01799850
-6.90734577 -3.72418642 -0.31901601
-6.90728188 -3.75769711 -0.13402490
-6.90722990 -3.75849271 -0.52179080
-6.90700912 -3.73300481 -0.23000030
-6.90700340 -3.77000189 -0.10200000
-6.90700006 -3.82299995 -0.00100000
-6.90700006 -3.72399998 -0.32400000
-6.90700006 -3.73300004 -0.42300001
-6.90700006 -3.73900008 -0.45100001
-6.90700006 -3.76399994 -0.53700000
-6.90699244 -3.84363508 0.02850030
-6.90698242 -3.73982811 -0.19739610
-6.90653229 -3.80415058 -0.03323890
-6.90636253 -3.79716134 -0.04509010
-6.90625572 -3.77514005 -0.09000330
-6.90600014 -3.86299992 0.05400000
-6.90600014 -3.83699989 0.02000000
-6.90600014 -3.73000002 -0.40300000
-6.90600014 -3.75000000 -0.49399999
-6.90598106 -3.75499010 -0.51199859
-6.90588140 -3.75739121 -0.51991570
-6.90568590 -3.76582885 -0.54197532
-6.90566015 -3.83381128 0.01599920
-6.90538502 -3.73220825 -0.23301300
-6.90534067 -3.82518864 0.00300010
-6.90521288 -3.84979725 0.03871830
-6.90515900 -3.75208640 -0.15100349
-6.90500021 -3.87100005 0.06300000
-6.90500021 -3.77999997 -0.07800000
-6.90500021 -3.74300003 -0.18200000
-6.90493822 -3.75908399 -0.12829730
-6.90463209 -3.84235168 0.02700250
-6.90449953 -3.76272750 -0.53396130
-6.90449810 -3.75463939 -0.14094891
-6.90438700 -3.81321383 -0.01600090
-6.90438557 -3.84721494 0.03500200
-6.90406513 -3.75657964 -0.13602100
-6.90399981 -3.88700008 0.08200000
-6.90399981 -3.86400008 0.05600000
-6.90399981 -3.85299993 0.04200000
-6.90399981 -3.73699999 -0.20600000
-6.90399981 -3.73099995 -0.41800001
-6.90374613 -3.88845348 0.08408810
-6.90364218 -3.80480289 -0.02999840
-6.90337086 -3.75303006 -0.14403360
-6.90329266 -3.81860876 -0.00599940
-6.90328217 -3.75915408 -0.52402151
-6.90313339 -3.75307250 -0.50900978
-6.90308332 -3.76804543 -0.10500130
-6.90299988 -3.87800002 0.07300000
-6.90299988 -3.82900000 0.01000000
-6.90299988 -3.82699990 0.00600000
-6.90299988 -3.72499990 -0.28700000
-6.90299988 -3.74799991 -0.49100000
-6.90299988 -3.76999998 -0.55500001
-6.90296841 -3.74998283 -0.15299930
-6.90295362 -3.80997491 -0.01999990
-6.90295362 -3.80697441 -0.02499980
-6.90290833 -3.75595045 -0.51699322
-6.90281677 -3.72490096 -0.29199219
-6.90265989 -3.83781099 0.02299890
-6.90261364 -3.80168772 -0.03580030
-6.90259743 -3.73078275 -0.23798610
-6.90227604 -3.76639175 -0.10793990
-6.90218258 -3.75698137 -0.13183860
-6.90201473 -3.84300804 0.03000010
-6.90199995 -3.88000011 0.07500000
-6.90199995 -3.77300000 -0.09200000
-6.90199995 -3.74200010 -0.18400000
-6.90199995 -3.73900008 -0.19599999
-6.90199995 -3.72700000 -0.25999999
-6.90199995 -3.73000002 -0.41499999
-6.90199995 -3.73300004 -0.43300000
-6.90199995 -3.76099992 -0.53200001
-6.90199995 -3.76399994 -0.54000002
-6.90198994 -3.73599458 -0.20899969
-6.90135813 -3.81964469 -0.00299970
-6.90134096 -3.75472951 -0.13802680
-6.90113211 -3.73007107 -0.24000460
-6.90111637 -3.75751901 -0.12898350
-6.90100002 -3.79500008 -0.04700000
-6.90100002 -3.73300004 -0.22600000
-6.90100002 -3.73200011 -0.43000001
-6.90100002 -3.77500010 -0.56500000
-6.90080118 -3.72689295 -0.26299250
-6.90044165 -3.72299838 -0.31762320
-6.90038109 -3.80153251 -0.03426870
-6.90026951 -3.76419020 -0.11052140
-6.90017796 -3.74909687 -0.15500399
-6.90008545 -3.82204723 0.00100000
-6.90001631 -3.80011034 -0.03801110
-6.90000486 -3.75248337 -0.50868767
-6.90000010 -3.88199997 0.07800000
-6.90000010 -3.86500001 0.05800000
-6.90000010 -3.73799992 -0.19900000
-6.90000010 -3.73499990 -0.21100000
-6.89999151 -3.74299550 -0.17499980
-6.89991617 -3.83095336 0.01299980
-6.89978218 -3.75188160 -0.50598413
-6.89973354 -3.72885585 -0.24299060
-6.89965963 -3.73181605 -0.22798879
-6.89961815 -3.84778690 0.03699800
-6.89926004 -3.76614189 -0.10700400
-6.89924717 -3.75318432 -0.51153278
-6.89909220 -3.75405002 -0.51400691
-6.89905119 -3.74954438 -0.15123869
-6.89901829 -3.72300959 -0.35300091
-6.89900017 -3.86700010 0.06100000
-6.89900017 -3.84400010 0.03200000
-6.89900017 -3.72299981 -0.35600001
-6.89900017 -3.76799989 -0.55199999
-6.89898443 -3.83899093 0.02499990
-6.89856863 -3.75122190 -0.14596970
-6.89856768 -3.80176139 -0.03199800
-6.89829636 -3.72262025 -0.33596569
-6.89826679 -3.72214413 -0.31901231
-6.89813519 -3.75361800 -0.14102320
-6.89804840 -3.80402660 -0.02700020
-6.89804697 -3.80702567 -0.02300020
-6.89800978 -3.81500530 -0.00800000
-6.89800882 -3.73100495 -0.23000030
-6.89799976 -3.89200020 0.09000000
-6.89799976 -3.86100006 0.05400000
-6.89799976 -3.74499989 -0.16700000
-6.89799976 -3.73399997 -0.21300000
-6.89799976 -3.72799993 -0.24500000
-6.89799976 -3.72299981 -0.31600001
-6.89799976 -3.72199988 -0.32400000
-6.89799976 -3.72299981 -0.33300000
-6.89799786 -3.74199891 -0.17699990
-6.89773893 -3.72937751 -0.41614759
-6.89764833 -3.75491357 -0.13289870
-6.89759922 -3.74778247 -0.15799080
-6.89726496 -3.87663579 0.07252920
-6.89699984 -3.87400031 0.07000000
-6.89699984 -3.83500004 0.02000000
-6.89663076 -3.74979925 -0.50297320
-6.89654922 -3.73189163 -0.43293199
-6.89648628 -3.88620234 0.08323970
-6.89638472 -3.73020816 -0.23301300
-6.89629221 -3.72821879 -0.24258190
-6.89614344 -3.84007978 0.02800060
-6.89599991 -3.78900003 -0.05400000
-6.89599991 -3.74099970 -0.17900001
-6.89599991 -3.73300004 -0.21600001
-6.89596796 -3.74943876 -0.14797790
-6.89584255 -3.75298071 -0.13943259
-6.89573956 -3.76385784 -0.10999580
-6.89559364 -3.81411505 -0.00865210
-6.89536095 -3.75219631 -0.51102668
-6.89514542 -3.72907877 -0.23500501
-6.89509773 -3.74605346 -0.16000231
-6.89506578 -3.74814868 -0.15186159
-6.89502954 -3.81701589 -0.00600000
-6.89499998 -3.89400005 0.09200000
-6.89499998 -3.81900001 -0.00100000
-6.89499998 -3.74300003 -0.17000000
-6.89499998 -3.73499990 -0.20400000
-6.89494991 -3.75206089 -0.14304049
-6.89457798 -3.73081470 -0.43037170
-6.89444876 -3.89075541 0.08912600
-6.89422607 -3.79751539 -0.03842900
-6.89405870 -3.74694610 -0.15554030
-6.89404535 -3.80255198 -0.02822060
-6.89400005 -3.87899995 0.07500000
-6.89400005 -3.84499979 0.03400000
-6.89400005 -3.82800007 0.01100000
-6.89400005 -3.72900009 -0.41800001
-6.89400005 -3.76799989 -0.55400002
-6.89350843 -3.72873425 -0.23798309
-6.89334965 -3.74810290 -0.14996409
-6.89325476 -3.79569077 -0.04000730
-6.89314222 -3.80407834 -0.02500050
-6.89306736 -3.74803638 -0.50100487
-6.89305973 -3.75022769 -0.50850600
-6.89305544 -3.80103064 -0.03000020
-6.89300013 -3.88700008 0.08500000
-6.89300013 -3.74200010 -0.17200001
-6.89300013 -3.72299981 -0.28700000
-6.89299154 -3.79899549 -0.03500000
-6.89239931 -3.74521661 -0.16300941
-6.89213276 -3.81207299 -0.01100020
-6.89204836 -3.75011444 -0.14604340
-6.89200497 -3.74106884 -0.17479070
-6.89200020 -3.86299992 0.05800000
-6.89200020 -3.83999991 0.03000000
-6.89200020 -3.76200008 -0.11200000
-6.89200020 -3.72499990 -0.25999999
-6.89200020 -3.72799993 -0.41499999
-6.89200020 -3.73099995 -0.43300000
-6.89186811 -3.72792840 -0.23999541
-6.89154577 -3.75275230 -0.13599101
-6.89148426 -3.74595976 -0.15744850
-6.89130545 -3.75137782 -0.14027190
-6.89114141 -3.82007837 0.00100000
-6.89099979 -3.91400003 0.11300000
-6.89099979 -3.78600001 -0.05700000
-6.89099979 -3.72399998 -0.26400000
-6.89099979 -3.73000002 -0.43000001
-6.89094591 -3.88840485 0.08698670
-6.89083481 -3.87283397 0.07022950
-6.89077044 -3.74678731 -0.15295050
-6.89072561 -3.72687054 -0.24346970
-6.89061499 -3.74739480 -0.50131232
-6.89050770 -3.74892616 -0.50729221
-6.89043427 -3.74323606 -0.16501039
-6.88999987 -3.72099996 -0.35600001
-6.88971090 -3.89033079 0.08932780
-6.88967419 -3.72082400 -0.35298330
-6.88964462 -3.74635053 -0.49804661
-6.88938808 -3.81224084 -0.00957780
-6.88918686 -3.74010158 -0.47801301
-6.88907623 -3.74858546 -0.14802310
-6.88899994 -3.92200017 0.12000000
-6.88899994 -3.75699997 -0.12200000
-6.88899994 -3.73200011 -0.21300000
-6.88874674 -3.75086212 -0.13799490
-6.88865089 -3.73981023 -0.17699100
-6.88833237 -3.74509358 -0.15496249
-6.88800001 -3.87199998 0.07000000
-6.88800001 -3.72600007 -0.24500000
-6.88787746 -3.79548311 -0.03800480
-6.88785887 -3.80192208 -0.02799940
-6.88782740 -3.75390601 -0.13099670
-6.88768959 -3.79882884 -0.03199860
-6.88747787 -3.74292445 -0.16386370
-6.88738155 -3.79321003 -0.04200230
-6.88738108 -3.78555918 -0.05642280
-6.88700008 -3.78699994 -0.05400000
-6.88700008 -3.73099995 -0.21600001
-6.88700008 -3.71900010 -0.30399999
-6.88700008 -3.71900010 -0.31099999
-6.88700008 -3.71900010 -0.33600000
-6.88700008 -3.72199988 -0.38499999
-6.88698769 -3.74399281 -0.49499911
-6.88655281 -3.73875690 -0.47496909
-6.88653231 -3.74683380 -0.15003340
-6.88634014 -3.74341846 -0.16069810
-6.88625622 -3.80914140 -0.01300050
-6.88611937 -3.88783240 0.08745760
-6.88610268 -3.83852792 0.03020720
-6.88600016 -3.93400025 0.13200000
-6.88600016 -3.88299990 0.08200000
-6.88600016 -3.80300021 -0.02300000
-6.88600016 -3.73900008 -0.17900001
-6.88600016 -3.73499990 -0.18900000
-6.88592148 -3.74128556 -0.16933310
-6.88579893 -3.71889162 -0.31399080
-6.88565826 -3.74635816 -0.50304812
-6.88539219 -3.74921370 -0.14100800
-6.88532591 -3.74408937 -0.15796161
-6.88500023 -3.93099999 0.12899999
-6.88500023 -3.81900001 0.00300000
-6.88500023 -3.81699991 -0.00100000
-6.88500023 -3.75500011 -0.12400000
-6.88500023 -3.73300004 -0.20400000
-6.88500023 -3.72099996 -0.38200000
-6.88482141 -3.83645749 0.02700320
-6.88470936 -3.74853301 -0.14392900
-6.88466692 -3.75236368 -0.13301291
-6.88449860 -3.74160028 -0.16606151
-6.88412619 -3.88439631 0.08438690
-6.88399982 -3.91300011 0.11300000
-6.88399982 -3.91000009 0.11000000
-6.88399982 -3.73399997 -0.19100000
-6.88399982 -3.73699999 -0.47200000
-6.88380384 -3.74289346 -0.49298590
-6.88369703 -3.74592328 -0.15303770
-6.88322544 -3.79012442 -0.04500150
-6.88313246 -3.81007314 -0.01100020
-6.88299990 -3.82699990 0.01500000
-6.88299990 -3.77300000 -0.07800000
-6.88299990 -3.73200011 -0.20600000
-6.88299990 -3.72299981 -0.25200000
-6.88299990 -3.72799993 -0.43500000
-6.88296223 -3.79148197 -0.04240590
-6.88295460 -3.79897475 -0.02999980
-6.88293600 -3.73896503 -0.17199840
-6.88286018 -3.74238062 -0.15997350
-6.88278294 -3.79288030 -0.03999870
-6.88275576 -3.74486685 -0.49998230
-6.88251686 -3.72227955 -0.25501910
-6.88251066 -3.79628181 -0.03500260
-6.88226509 -3.74673033 -0.14689250
-6.88207865 -3.74804258 -0.14300171
-6.88199997 -3.78399992 -0.05700000
-6.88199997 -3.78099990 -0.06100000
-6.88199997 -3.72499990 -0.23800001
-6.88199997 -3.72199988 -0.40000001
-6.88199997 -3.73900008 -0.47999999
-6.88164139 -3.80678844 -0.01502880
-6.88161039 -3.74387622 -0.15503630
-6.88125515 -3.74129081 -0.16323911
-6.88109827 -3.74519062 -0.15111580
-6.88109303 -3.74105048 -0.49000660
-6.88100624 -3.72700310 -0.43200040
-6.88100004 -3.92000008 0.12000000
-6.88100004 -3.75000000 -0.13600001
-6.88100004 -3.72399998 -0.41499999
-6.88100004 -3.73000002 -0.44700000
-6.88083458 -3.72191048 -0.39699051
-6.88000011 -3.91700029 0.11700000
-6.88000011 -3.88499999 0.08600000
-6.88000011 -3.72399998 -0.23999999
-6.88000011 -3.72099996 -0.26199999
-6.87998962 -3.74299407 -0.49799919
-6.87995672 -3.92859054 0.12774670
-6.87967396 -3.73782229 -0.47797731
-6.87952423 -3.73916507 -0.16946401
-6.87950087 -3.73827195 -0.17501269
-6.87935591 -3.74619412 -0.14500751
-6.87925959 -3.77114224 -0.08000300
-6.87902212 -3.72601175 -0.42900130
-6.87900019 -3.75500011 -0.12200000
-6.87900019 -3.71799994 -0.30300000
-6.87900019 -3.72900009 -0.44400001
-6.87891626 -3.78795409 -0.04699940
-6.87886381 -3.72186136 -0.25335521
-6.87876272 -3.74295902 -0.15804049
-6.87868547 -3.72337127 -0.41204110
-6.87867975 -3.81637740 0.00100010
-6.87847185 -3.83514762 0.02899360
-6.87822628 -3.73957920 -0.16498150
-6.87813091 -3.79607272 -0.03300060
-6.87809610 -3.79005289 -0.04200060
-6.87805700 -3.79303145 -0.03700030
-6.87802696 -3.83301520 0.02500010
-6.87801456 -3.71700811 -0.29800069
-6.87801075 -3.74000645 -0.48700079
-6.87799978 -3.84699988 0.04400000
-6.87799978 -3.77900004 -0.06400000
-6.87799978 -3.75099993 -0.12899999
-6.87799978 -3.74799991 -0.13800000
-6.87799978 -3.73099995 -0.19900000
-6.87799978 -3.71700001 -0.31099999
-6.87799978 -3.71700001 -0.35200000
-6.87747288 -3.80726171 -0.01300090
-6.87731171 -3.73616934 -0.17700800
-6.87727308 -3.82315207 0.01300050
-6.87699986 -3.92899990 0.12899999
-6.87699986 -3.80100012 -0.02300000
-6.87699986 -3.73300004 -0.18900000
-6.87699986 -3.71700001 -0.33500001
-6.87699986 -3.71700001 -0.33800000
-6.87699986 -3.71999979 -0.38400000
-6.87699986 -3.72199988 -0.40900001
-6.87699986 -3.72499990 -0.42699999
-6.87690783 -3.74194980 -0.49499339
-6.87686729 -3.73567867 -0.47250301
-6.87673712 -3.83741140 0.03200340
-6.87673235 -3.74485421 -0.14799421
-6.87640047 -3.71621680 -0.31501839
-6.87634230 -3.75018692 -0.13100649
-6.87619162 -3.74119210 -0.16005100
-6.87610865 -3.71605897 -0.31800500
-6.87600851 -3.71600485 -0.32500041
-6.87600279 -3.73000169 -0.20100009
-6.87599993 -3.92600012 0.12600000
-6.87599993 -3.90799999 0.11000000
-6.87599993 -3.75299978 -0.12400000
-6.87599993 -3.72199988 -0.24699999
-6.87599993 -3.71600008 -0.33000001
-6.87574244 -3.76885867 -0.08299690
-6.87572432 -3.73830628 -0.16696900
-6.87559652 -3.80333018 -0.01800160
-6.87554884 -3.71629667 -0.34502751
-6.87533140 -3.73817992 -0.48502341
-6.87529421 -3.73704338 -0.17340320
-6.87500000 -3.81699991 0.00300000
-6.87500000 -3.74900007 -0.13300000
-6.87500000 -3.73200011 -0.19100000
-6.87500000 -3.72099996 -0.25000000
-6.87500000 -3.71600008 -0.34200001
-6.87500000 -3.71900010 -0.38200000
-6.87492132 -3.73495698 -0.17899799
-6.87452316 -3.72276354 -0.41363379
-6.87451744 -3.78573418 -0.04999650
-6.87440109 -3.74321842 -0.15000880
-6.87411213 -3.74006081 -0.49200800
-6.87400818 -3.72900414 -0.20300020
-6.87400007 -3.87899995 0.08200000
-6.87400007 -3.82500005 0.01500000
-6.87400007 -3.77099991 -0.07800000
-6.87400007 -3.76500010 -0.09000000
-6.87400007 -3.75999999 -0.10200000
-6.87400007 -3.72600007 -0.21799999
-6.87400007 -3.71799994 -0.37900001
-6.87344646 -3.71573973 -0.34885040
-6.87339687 -3.79321909 -0.03500200
-6.87319708 -3.74019575 -0.16205180
-6.87316990 -3.81309414 -0.00200000
-6.87316036 -3.78808880 -0.04500110
-6.87306213 -3.72499943 -0.42993751
-6.87302876 -3.79101610 -0.04000020
-6.87299967 -3.77900004 -0.06100000
-6.87299967 -3.72600007 -0.43399999
-6.87288570 -3.72047925 -0.25403279
-6.87280512 -3.73735023 -0.16997039
-6.87265110 -3.73681021 -0.48197550
-6.87256622 -3.80431366 -0.01600130
-6.87251282 -3.73373556 -0.18198711
-6.87232208 -3.72073531 -0.24868301
-6.87209463 -3.72505116 -0.22000299
-6.87208128 -3.72804379 -0.20600240
-6.87200022 -3.91499972 0.11700000
-6.87200022 -3.82900000 0.02200000
-6.87200022 -3.79800010 -0.02500000
-6.87200022 -3.79500008 -0.03000000
-6.87200022 -3.74799991 -0.13600001
-6.87200022 -3.72299981 -0.23700000
-6.87200022 -3.71999979 -0.25700000
-6.87200022 -3.71700001 -0.28400001
-6.87200022 -3.71700001 -0.37400001
-6.87200022 -3.71999979 -0.39899999
-6.87199450 -3.74199700 -0.15299989
-6.87196732 -3.82186604 0.01284050
-6.87191820 -3.76695514 -0.08499900
-6.87138748 -3.82021570 0.01000060
-6.87133932 -3.83207393 0.02699350
-6.87101793 -3.71600986 -0.28800070
-6.87099981 -3.88000011 0.08400000
-6.87099981 -3.84299994 0.04100000
-6.87099981 -3.80000019 -0.02100000
-6.87099981 -3.72199988 -0.23999999
-6.87099981 -3.72799993 -0.44700000
-6.87099552 -3.73808599 -0.16504790
-6.87097883 -3.72498846 -0.43199870
-6.87084246 -3.73891449 -0.48998880
-6.87065506 -3.76881075 -0.08099590
-6.87039280 -3.75821519 -0.10400600
-6.87035131 -3.72719097 -0.20801060
-6.87033558 -3.72418189 -0.22301090
-6.87030125 -3.73562026 -0.17198250
-6.87023020 -3.73212528 -0.18400620
-6.87015772 -3.73508573 -0.47901100
-6.87009573 -3.78305268 -0.05200070
-6.87000179 -3.71600127 -0.29100010
-6.87000036 -3.81400013 0.00100000
-6.86999989 -3.81699991 0.00500000
-6.86999989 -3.75000000 -0.12899999
-6.86999989 -3.71900010 -0.26199999
-6.86999989 -3.71900010 -0.39399999
-6.86999989 -3.72199988 -0.41400000
-6.86999989 -3.72700000 -0.44400001
-6.86998940 -3.83399439 0.02900000
-6.86997318 -3.72918630 -0.19948620
-6.86951780 -3.74073744 -0.15498909
-6.86942196 -3.73400187 -0.17611469
-6.86927319 -3.82871342 0.02296130
-6.86921215 -3.73348784 -0.17922090
-6.86918211 -3.74813390 -0.13227101
-6.86902189 -3.71501160 -0.29600099
-6.86899996 -3.84499979 0.04400000
-6.86899996 -3.77699995 -0.06400000
-6.86899996 -3.76300001 -0.09300000
-6.86899996 -3.74600005 -0.13800000
-6.86899996 -3.72600007 -0.21100000
-6.86899519 -3.72399735 -0.42899969
-6.86883831 -3.78491116 -0.04699890
-6.86867762 -3.72082543 -0.41098079
-6.86865234 -3.79080820 -0.03699810
-6.86861324 -3.78778720 -0.04199760
-6.86853027 -3.73683286 -0.16703720
-6.86837292 -3.84288621 0.04157670
-6.86823511 -3.73917198 -0.15913031
-6.86818886 -3.82110500 0.01300040
-6.86800051 -3.73700023 -0.48699999
-6.86800003 -3.80999994 -0.00400000
-6.86800003 -3.76500010 -0.08800000
-6.86800003 -3.71499991 -0.30100000
-6.86800003 -3.71499991 -0.35200000
-6.86800003 -3.71700001 -0.38900000
-6.86794472 -3.80196953 -0.01799990
-6.86764002 -3.73134780 -0.18701740
-6.86736012 -3.71419454 -0.31501651
-6.86724424 -3.73413324 -0.47701699
-6.86722326 -3.75612235 -0.10700350
-6.86709547 -3.71405149 -0.34700480
-6.86706591 -3.71403575 -0.31800300
-6.86701202 -3.71400666 -0.32200059
-6.86700010 -3.83500004 0.03100000
-6.86700010 -3.76999998 -0.07600000
-6.86700010 -3.71999979 -0.24699999
-6.86700010 -3.71700001 -0.26699999
-6.86700010 -3.71399999 -0.31000000
-6.86700010 -3.71999979 -0.40900001
-6.86700010 -3.72299981 -0.42600000
-6.86698103 -3.78347969 -0.04972760
-6.86691523 -3.76695347 -0.08299900
-6.86690617 -3.71394944 -0.32499561
-6.86690474 -3.87629247 0.08119410
-6.86682177 -3.79245353 -0.03300390
-6.86677837 -3.72354054 -0.22223820
-6.86666870 -3.74781895 -0.13099369
-6.86625004 -3.72813559 -0.20100731
-6.86601067 -3.73554993 -0.17002501
-6.86600018 -3.81699991 0.00800000
-6.86600018 -3.71600008 -0.27100000
-6.86600018 -3.71399999 -0.33000001
-6.86600018 -3.71600008 -0.38400000
-6.86585855 -3.71392298 -0.34199291
-6.86582899 -3.72990680 -0.18899530
-6.86580229 -3.73280501 -0.17694330
-6.86530399 -3.82805443 0.02399410
-6.86529016 -3.73515773 -0.48402041
-6.86508894 -3.78195024 -0.05155350
-6.86506939 -3.84225011 0.04169700
-6.86500025 -3.81100035 -0.00200000
-6.86499977 -3.87400031 0.07900000
-6.86499977 -3.82500005 0.02000000
-6.86499977 -3.75799990 -0.10200000
-6.86499977 -3.71900010 -0.24900000
-6.86499977 -3.71300006 -0.33500001
-6.86499977 -3.71600008 -0.37900001
-6.86482048 -3.83310819 0.02946370
-6.86474848 -3.72686338 -0.20299250
-6.86474562 -3.79225779 -0.03146050
-6.86461639 -3.73279142 -0.47397351
-6.86461353 -3.81378531 0.00299980
-6.86403036 -3.83101726 0.02700010
-6.86400843 -3.78800488 -0.04000000
-6.86399937 -3.86500001 0.07000000
-6.86399937 -3.85599995 0.06000000
-6.86399937 -3.79900002 -0.02100000
-6.86399937 -3.76799989 -0.07800000
-6.86399937 -3.76300001 -0.09000000
-6.86399937 -3.72399998 -0.21799999
-6.86399937 -3.71799994 -0.25200000
-6.86398888 -3.73799372 -0.15999970
-6.86396551 -3.73638988 -0.16438620
-6.86392212 -3.72895789 -0.19099779
-6.86390781 -3.78294969 -0.04899930
-6.86379004 -3.78488445 -0.04499860
-6.86377716 -3.75487852 -0.10899650
-6.86369133 -3.74637747 -0.13401350
-6.86327934 -3.73206449 -0.17895509
-6.86323643 -3.73526573 -0.16787770
-6.86321115 -3.73064494 -0.18285739
-6.86315775 -3.73463011 -0.17202900
-6.86300468 -3.76500249 -0.08500010
-6.86299992 -3.87500000 0.08100000
-6.86299992 -3.71499991 -0.27599999
-6.86299992 -3.71499991 -0.28400001
-6.86299992 -3.71499991 -0.37400001
-6.86299276 -3.72599626 -0.20599981
-6.86251545 -3.71427894 -0.27902099
-6.86249304 -3.71726680 -0.25401819
-6.86232424 -3.73417640 -0.48202279
-6.86208868 -3.72304821 -0.22000280
-6.86207581 -3.73104119 -0.47200519
-6.86204815 -3.81802654 0.01000010
-6.86203098 -3.79001689 -0.03500020
-6.86201811 -3.71400976 -0.28800070
-6.86199999 -3.84100008 0.04100000
-6.86199999 -3.79500008 -0.02600000
-6.86199999 -3.79299998 -0.03000000
-6.86199999 -3.75900006 -0.09700000
-6.86199522 -3.72799730 -0.19399990
-6.86148691 -3.73626518 -0.16201150
-6.86139297 -3.75621533 -0.10400600
-6.86134052 -3.72518492 -0.20801030
-6.86109400 -3.73050714 -0.18097609
-6.86100006 -3.81499982 0.00500000
-6.86100006 -3.76099992 -0.09200000
-6.86100006 -3.72199988 -0.43399999
-6.86098576 -3.71399260 -0.29099941
-6.86093712 -3.71696591 -0.25699770
-6.86084080 -3.83191109 0.02899930
-6.86083126 -3.77790713 -0.05699860
-6.86080313 -3.73298073 -0.17404570
-6.86069298 -3.75283170 -0.11199500
-6.86035442 -3.72219253 -0.22201151
-6.86030960 -3.71527171 -0.26744029
-6.86009073 -3.72704935 -0.19600260
-6.86000013 -3.80800009 -0.00400000
-6.86000013 -3.74399996 -0.13600001
-6.86000013 -3.72399998 -0.20999999
-6.86000013 -3.71900010 -0.41600001
-6.85999155 -3.72790051 -0.19177160
-6.85986614 -3.72960186 -0.18403590
-6.85986090 -3.73292422 -0.47899029
-6.85983181 -3.71290898 -0.29599279
-6.85982370 -3.78455544 -0.04429880
-6.85961533 -3.73360038 -0.17125081
-6.85934877 -3.78019190 -0.05200260
-6.85921240 -3.82500339 0.02199430
-6.85916376 -3.73008895 -0.46901119
-6.85910225 -3.72105527 -0.43100640
-6.85900021 -3.76300001 -0.08800000
-6.85900021 -3.75699997 -0.10000000
-6.85900021 -3.72099996 -0.22499999
-6.85900021 -3.71499991 -0.26100001
-6.85900021 -3.71199989 -0.30100000
-6.85900021 -3.72600007 -0.45600000
-6.85900021 -3.75999999 -0.56000000
-6.85895443 -3.82197428 0.01699990
-6.85883570 -3.73491049 -0.16499600
-6.85877562 -3.78587580 -0.04199860
-6.85872698 -3.81084800 0.00000000
-6.85865259 -3.78236008 -0.04700450
-6.85847759 -3.73180389 -0.17703810
-6.85840988 -3.72819591 -0.18745820
-6.85822344 -3.75412250 -0.10700350
-6.85816383 -3.72608972 -0.19900480
-6.85801792 -3.71200991 -0.35900101
-6.85799980 -3.78699994 -0.03800000
-6.85799980 -3.71199989 -0.31000000
-6.85799980 -3.71199989 -0.31299999
-6.85799980 -3.71199989 -0.36199999
-6.85799980 -3.71499991 -0.38900000
-6.85799980 -3.71799994 -0.41400000
-6.85790110 -3.73094654 -0.47599319
-6.85786819 -3.82792687 0.02399950
-6.85780239 -3.78989077 -0.03199910
-6.85744286 -3.71223950 -0.34702241
-6.85725546 -3.75113964 -0.11400430
-6.85724640 -3.72013378 -0.42901540
-6.85717630 -3.71509552 -0.38600999
-6.85707140 -3.72803903 -0.46600491
-6.85699987 -3.86899996 0.07700000
-6.85699987 -3.86100006 0.06700000
-6.85699987 -3.85200000 0.05700000
-6.85699987 -3.76799989 -0.07600000
-6.85699987 -3.73900008 -0.14800000
-6.85699987 -3.71499991 -0.26600000
-6.85698366 -3.72499108 -0.45399889
-6.85690212 -3.71194673 -0.34399509
-6.85682917 -3.71390772 -0.26899329
-6.85653687 -3.75695610 -0.09903890
-6.85648584 -3.72472072 -0.20098490
-6.85644150 -3.77524328 -0.06000390
-6.85634041 -3.79218841 -0.02800140
-6.85632658 -3.73363328 -0.16698360
-6.85629702 -3.73070598 -0.17903391
-6.85599995 -3.85400009 0.06000000
-6.85599995 -3.81499982 0.00800000
-6.85599995 -3.71099997 -0.31799999
-6.85599995 -3.71099997 -0.33199999
-6.85575914 -3.71886945 -0.42598510
-6.85563517 -3.78719473 -0.03673570
-6.85561371 -3.81178498 0.00299980
-6.85529137 -3.73015857 -0.47402009
-6.85501719 -3.72400928 -0.45100111
-6.85501432 -3.72547245 -0.19713540
-6.85500002 -3.87100005 0.07900000
-6.85500002 -3.86299992 0.06900000
-6.85500002 -3.71600008 -0.25099999
-6.85500002 -3.71099997 -0.33500001
-6.85478830 -3.77768731 -0.05432740
-6.85477734 -3.75287819 -0.10899650
-6.85471249 -3.72729993 -0.18896450
-6.85461664 -3.74370027 -0.13430209
-6.85461187 -3.75733519 -0.55704981
-6.85458708 -3.71277666 -0.27298361
-6.85454273 -3.72729468 -0.46403670
-6.85430956 -3.82261515 0.01899810
-6.85417938 -3.72409749 -0.20300530
-6.85406208 -3.72957802 -0.18202820
-6.85400009 -3.74900007 -0.11600000
-6.85400009 -3.73799992 -0.15000001
-6.85400009 -3.71499991 -0.40400001
-6.85400009 -3.71799994 -0.42399999
-6.85393143 -3.73196244 -0.16899830
-6.85387087 -3.81044221 0.00123950
-6.85382318 -3.77990198 -0.04899870
-6.85378218 -3.78287983 -0.04499860
-6.85372543 -3.71285105 -0.27598891
-6.85354757 -3.71575475 -0.25398320
-6.85300016 -3.80699992 -0.00200000
-6.85300016 -3.76600003 -0.07800000
-6.85300016 -3.75699997 -0.09700000
-6.85300016 -3.72299981 -0.44900000
-6.85296583 -3.72898102 -0.47099760
-6.85285854 -3.81892109 0.01499970
-6.85277653 -3.72633505 -0.19096591
-6.85277319 -3.78787446 -0.03499880
-6.85274410 -3.72586060 -0.46098280
-6.85246277 -3.86819363 0.07701570
-6.85243607 -3.82424307 0.02200140
-6.85225344 -3.72321248 -0.20522170
-6.85213184 -3.71507144 -0.25600490
-6.85200071 -3.77300024 -0.06200000
-6.85200024 -3.71199989 -0.28099999
-6.85200024 -3.71399999 -0.40099999
-6.85200024 -3.71999979 -0.43300000
-6.85174322 -3.72840452 -0.18402000
-6.85169315 -3.75083184 -0.11199500
-6.85159636 -3.72531652 -0.19386549
-6.85122824 -3.73112416 -0.17200570
-6.85099983 -3.79299998 -0.02600000
-6.85099983 -3.74200010 -0.13600001
-6.85099983 -3.71099997 -0.36199999
-6.85099983 -3.71700001 -0.41600001
-6.85092974 -3.72965527 -0.17445821
-6.85073280 -3.71385550 -0.25898990
-6.85068703 -3.77434230 -0.05828940
-6.85067558 -3.72482371 -0.45797831
-6.85058737 -3.72777557 -0.46897179
-6.85053396 -3.71046090 -0.30202410
-6.85047197 -3.75525904 -0.55403823
-6.85010386 -3.71105623 -0.28600439
-6.85000563 -3.72200322 -0.20800020
-6.84999990 -3.86500001 0.07400000
-6.84999990 -3.85100007 0.05700000
-6.84999990 -3.75799990 -0.56000000
-6.84966850 -3.71936345 -0.43104210
-6.84959030 -3.79130554 -0.02746530
-6.84953642 -3.72729182 -0.18601459
-6.84952879 -3.71028662 -0.35902771
-6.84939575 -3.77721810 -0.05200300
-6.84918261 -3.71009922 -0.29000771
-6.84917736 -3.72400904 -0.19594780
-6.84899998 -3.85899997 0.06700000
-6.84899998 -3.75500011 -0.10000000
-6.84899998 -3.71799994 -0.22499999
-6.84899998 -3.71300006 -0.26100001
-6.84899998 -3.71600008 -0.41299999
-6.84888792 -3.72448277 -0.45605910
-6.84884071 -3.81891131 0.01699960
-6.84868240 -3.70982790 -0.29298639
-6.84864473 -3.78035569 -0.04700440
-6.84857893 -3.72761059 -0.18329310
-6.84848166 -3.72626185 -0.46603280
-6.84825516 -3.74913979 -0.11400430
-6.84809685 -3.71805239 -0.42800611
-6.84807825 -3.72104239 -0.21100239
-6.84800005 -3.78500009 -0.03700000
-6.84800005 -3.74000001 -0.13800000
-6.84800005 -3.71499991 -0.24200000
-6.84800005 -3.70900011 -0.29800001
-6.84800005 -3.71000004 -0.30300000
-6.84800005 -3.70900011 -0.35400000
-6.84794569 -3.75413299 -0.55291128
-6.84766817 -3.72590756 -0.18904610
-6.84752083 -3.77073598 -0.06399550
-6.84722757 -3.81512666 0.01200040
-6.84720898 -3.72302628 -0.19794820
-6.84700871 -3.71700454 -0.22700030
-6.84700012 -3.86599994 0.07600000
-6.84700012 -3.73699999 -0.14800000
-6.84657145 -3.71676683 -0.42597330
-6.84657049 -3.72285414 -0.45110351
-6.84656477 -3.72876310 -0.17698871
-6.84652519 -3.81699848 0.01468000
-6.84651613 -3.71373701 -0.24698250
-6.84640598 -3.72522092 -0.46302739
-6.84634018 -3.79018831 -0.02800140
-6.84625816 -3.72013998 -0.21300800
-6.84601355 -3.70800734 -0.34400070
-6.84600878 -3.70800471 -0.33400041
-6.84600878 -3.70800471 -0.33900040
-6.84600019 -3.70799971 -0.30700001
-6.84600019 -3.70799971 -0.31200001
-6.84600019 -3.70900011 -0.31500000
-6.84600019 -3.70799971 -0.31999999
-6.84600019 -3.70799971 -0.32900000
-6.84600019 -3.70799971 -0.34700000
-6.84570217 -3.72492599 -0.19104750
-6.84552670 -3.75528908 -0.55704278
-6.84521103 -3.72157121 -0.20097689
-6.84511757 -3.76979899 -0.06462530
-6.84508657 -3.77504826 -0.05400070
-6.84499979 -3.75200009 -0.10200000
-6.84499979 -3.74699998 -0.11600000
-6.84499979 -3.73600006 -0.15000001
-6.84499979 -3.71300006 -0.24900000
-6.84499979 -3.71099997 -0.27300000
-6.84499979 -3.70799971 -0.32499999
-6.84499121 -3.71599579 -0.22999971
-6.84483671 -3.72691131 -0.17899570
-6.84476757 -3.81522751 0.01298540
-6.84475088 -3.71886492 -0.21499220
-6.84470892 -3.77127123 -0.06030350
-6.84466314 -3.71581745 -0.42297921
-6.84451485 -3.72373629 -0.46096739
-6.84448719 -3.71072221 -0.27597931
-6.84445333 -3.73024726 -0.16901121
-6.84435654 -3.77719688 -0.05000260
-6.84431124 -3.72171283 -0.44808581
-6.84399986 -3.80500007 -0.00200000
-6.84399986 -3.71300006 -0.40300000
-6.84391260 -3.72349620 -0.19402590
-6.84360838 -3.71980143 -0.20913351
-6.84309292 -3.76805091 -0.06700090
-6.84299994 -3.86100006 0.07200000
-6.84299994 -3.71499991 -0.23199999
-6.84299517 -3.71799731 -0.21799991
-6.84289265 -3.71290994 -0.24737190
-6.84276867 -3.71487451 -0.41998580
-6.84275913 -3.72086883 -0.20299280
-6.84274387 -3.71186137 -0.40098500
-6.84259033 -3.72027683 -0.44613501
-6.84236288 -3.70789266 -0.29700050
-6.84231091 -3.72616911 -0.18100820
-6.84227419 -3.72260523 -0.45795140
-6.84215975 -3.81608891 0.01500030
-6.84203434 -3.72352958 -0.19216719
-6.84200096 -3.75247860 -0.55215639
-6.84200001 -3.78699994 -0.03000000
-6.84199429 -3.72899723 -0.17199990
-6.84183931 -3.72245622 -0.19602400
-6.84183884 -3.72167420 -0.45358190
-6.84178972 -3.76988411 -0.06199810
-6.84140778 -3.70805359 -0.29341319
-6.84130192 -3.81216788 0.01000040
-6.84126043 -3.75014257 -0.10400400
-6.84124994 -3.71113539 -0.39801449
-6.84108400 -3.71917129 -0.20776080
-6.84100008 -3.79500008 -0.01700000
-6.84100008 -3.71399999 -0.23700000
-6.84100008 -3.70900011 -0.28299999
-6.84100008 -3.74699998 -0.54100001
-6.84077311 -3.77287459 -0.05699810
-6.84064627 -3.71635127 -0.22302110
-6.84059286 -3.71977854 -0.20498779
-6.84030008 -3.70816278 -0.28801259
-6.84021187 -3.72711539 -0.17400540
-6.84016705 -3.72509074 -0.18400450
-6.83991528 -3.77495337 -0.05199940
-6.83986807 -3.71847200 -0.44305620
-6.83979750 -3.72143340 -0.19802310
-6.83956814 -3.88573599 0.09843160
-6.83955002 -3.72129917 -0.45603669
-6.83951283 -3.72051287 -0.45009819
-6.83940220 -3.77337456 -0.05482590
-6.83921814 -3.72386932 -0.18783680
-6.83907747 -3.71780992 -0.21237490
-6.83904362 -3.70802331 -0.29200181
-6.83900023 -3.71300006 -0.23899999
-6.83900023 -3.71000004 -0.39300001
-6.83900023 -3.74099970 -0.52300000
-6.83895779 -3.71597719 -0.22499859
-6.83887148 -3.70693016 -0.29499441
-6.83824921 -3.76613712 -0.06900250
-6.83799982 -3.88700008 0.10000000
-6.83799982 -3.74300003 -0.12100000
-6.83799982 -3.73799992 -0.13800000
-6.83799982 -3.71300006 -0.24200000
-6.83799982 -3.70700002 -0.35100001
-6.83799982 -3.70700002 -0.35400000
-6.83790779 -3.71479440 -0.22832830
-6.83773994 -3.74785733 -0.10699590
-6.83760405 -3.85868478 0.07077970
-6.83751488 -3.72073579 -0.20098570
-6.83740234 -3.86109781 0.07398270
-6.83721972 -3.71711969 -0.44001421
-6.83721447 -3.75042605 -0.10204590
-6.83720922 -3.76811504 -0.06400200
-6.83717299 -3.70609379 -0.34400871
-6.83702374 -3.71581912 -0.22024509
-6.83699989 -3.80100012 -0.00500000
-6.83699989 -3.75600004 -0.08800000
-6.83699989 -3.70600009 -0.31200001
-6.83699989 -3.75099993 -0.55100000
-6.83696938 -3.70598340 -0.34099850
-6.83691502 -3.71995354 -0.45299441
-6.83675480 -3.76986527 -0.05899790
-6.83668756 -3.74537659 -0.53805411
-6.83660412 -3.72278428 -0.18898910
-6.83653784 -3.71174884 -0.24598341
-6.83635855 -3.70619440 -0.30901620
-6.83631182 -3.81217384 0.01200050
-6.83626556 -3.70614433 -0.33601311
-6.83601236 -3.70600700 -0.33100060
-6.83599997 -3.70600009 -0.31900001
-6.83599997 -3.70600009 -0.32400000
-6.83596992 -3.72087669 -0.19518560
-6.83585119 -3.71747208 -0.44324201
-6.83582497 -3.71890497 -0.20299479
-6.83574438 -3.71677351 -0.21292970
-6.83569908 -3.80883241 0.00699970
-6.83561945 -3.71379304 -0.22998720
-6.83560610 -3.77278256 -0.05399690
-6.83542156 -3.71855211 -0.44816431
-6.83534098 -3.79218912 -0.01900090
-6.83531141 -3.72021604 -0.19977160
-6.83500004 -3.85700011 0.06900000
-6.83500004 -3.71099997 -0.24900000
-6.83500004 -3.70799971 -0.38100001
-6.83498955 -3.71599436 -0.43799931
-6.83497477 -3.71398616 -0.42299849
-6.83457375 -3.76331592 -0.07200600
-6.83451843 -3.72173738 -0.19098650
-6.83442497 -3.71560001 -0.21491900
-6.83433580 -3.74118400 -0.12400610
-6.83421230 -3.77149892 -0.05594430
-6.83413315 -3.71507573 -0.21874860
-6.83408213 -3.71304488 -0.23200279
-6.83400011 -3.74600005 -0.10900000
-6.83365011 -3.71387768 -0.22781560
-6.83340406 -3.71822000 -0.20601220
-6.83311653 -3.71006346 -0.40000689
-6.83310509 -3.74305773 -0.53500831
-6.83305740 -3.71203113 -0.23500200
-6.83301115 -3.71500587 -0.43500069
-6.83300400 -3.75400186 -0.09000000
-6.83300018 -3.71300006 -0.41999999
-6.83299971 -3.74199367 -0.12101260
-6.83294678 -3.76597095 -0.06599950
-6.83238173 -3.80911303 0.00896720
-6.83233023 -3.70917964 -0.25401229
-6.83231878 -3.72017360 -0.19300900
-6.83199978 -3.74499989 -0.54100001
-6.83195400 -3.76320791 -0.07052730
-6.83195257 -3.71697378 -0.44799691
-6.83190393 -3.76794696 -0.06199910
-6.83182955 -3.70890737 -0.39799011
-6.83176374 -3.76891470 -0.05903600
-6.83148241 -3.71680713 -0.20804520
-6.83143854 -3.71169519 -0.23698050
-6.83142948 -3.75923657 -0.07800490
-6.83141613 -3.76177979 -0.07401530
-6.83129978 -3.74816442 -0.10500460
-6.83124495 -3.71506739 -0.43752110
-6.83122635 -3.71403551 -0.21994290
-6.83099937 -3.79299998 -0.01600000
-6.83099937 -3.73900008 -0.12600000
-6.83098364 -3.71399140 -0.43299901
-6.83057213 -3.71631241 -0.44418570
-6.83045769 -3.70824862 -0.39502650
-6.83000851 -3.71314120 -0.22664440
-6.82999992 -3.78900003 -0.02200000
-6.82999992 -3.70499992 -0.28299999
-6.82995653 -3.71897650 -0.19599870
-6.82986498 -3.71092653 -0.23899530
-6.82977581 -3.71821189 -0.20094560
-6.82977343 -3.80587411 0.00499980
-6.82966280 -3.74025774 -0.12327970
-6.82964039 -3.74080300 -0.53297192
-6.82960653 -3.85621333 0.07098550
-6.82955027 -3.71584392 -0.21004771
-6.82945442 -3.70899439 -0.25112441
-6.82931995 -3.71363020 -0.22197790
-6.82908583 -3.71304679 -0.43000540
-6.82908344 -3.75204611 -0.09300110
-6.82905483 -3.76303005 -0.06900050
-6.82886505 -3.71143842 -0.23189670
-6.82881975 -3.71712589 -0.20451280
-6.82863426 -3.71442032 -0.43739450
-6.82845879 -3.80717468 0.00751280
-6.82838869 -3.71021128 -0.24201380
-6.82825565 -3.74314022 -0.53802007
-6.82800007 -3.74600029 -0.10700000
-6.82799959 -3.81299996 0.01600000
-6.82799959 -3.79900002 -0.00500000
-6.82799959 -3.74900007 -0.10000000
-6.82799959 -3.74099970 -0.12100000
-6.82799959 -3.72900009 -0.15400000
-6.82799959 -3.70400000 -0.36300001
-6.82781839 -3.71498895 -0.21305670
-6.82759285 -3.75987673 -0.07601770
-6.82757902 -3.71277142 -0.22398619
-6.82751942 -3.71828270 -0.19801509
-6.82748508 -3.70372081 -0.35797301
-6.82748222 -3.76526570 -0.06400450
-6.82740498 -3.71221995 -0.42702529
-6.82733870 -3.75718617 -0.08100400
-6.82718801 -3.71510220 -0.44201219
-6.82713890 -3.70907545 -0.24400499
-6.82708693 -3.76804805 -0.05900080
-6.82704830 -3.76096129 -0.07299100
-6.82700014 -3.75399995 -0.08800000
-6.82700014 -3.74200010 -0.11400000
-6.82626963 -3.75163150 -0.09267240
-6.82615757 -3.70808554 -0.24700570
-6.82612944 -3.71106982 -0.42500800
-6.82612085 -3.71461010 -0.21503530
-6.82609844 -3.79571700 -0.00865790
-6.82600021 -3.90300012 0.11800000
-6.82600021 -3.80900002 0.01200000
-6.82600021 -3.70900011 -0.41000000
-6.82600021 -3.73900008 -0.52999997
-6.82599926 -3.78999949 -0.01900000
-6.82593536 -3.71196485 -0.22699790
-6.82582140 -3.71690273 -0.20099470
-6.82537746 -3.71420574 -0.44002441
-6.82534552 -3.75018978 -0.09500480
-6.82513046 -3.71447515 -0.21209900
-6.82502508 -3.72801399 -0.15700060
-6.82499981 -3.90499997 0.12000000
-6.82499981 -3.70499992 -0.27000001
-6.82499981 -3.70199990 -0.31200001
-6.82499981 -3.70300007 -0.34799999
-6.82499981 -3.70300007 -0.35100001
-6.82499170 -3.70199585 -0.32899961
-6.82492256 -3.70195818 -0.32599631
-6.82491875 -3.74695539 -0.10199880
-6.82483244 -3.71345329 -0.21802659
-6.82475185 -3.74086404 -0.53498060
-6.82474613 -3.80585885 0.00699970
-6.82474613 -3.76086044 -0.07099740
-6.82473469 -3.70185637 -0.33398700
-6.82470798 -3.71084142 -0.22899020
-6.82465219 -3.73880982 -0.12399370
-6.82452917 -3.82229638 0.03000230
-6.82452917 -3.71074414 -0.42197090
-6.82439518 -3.74421692 -0.11000640
-6.82426882 -3.70214629 -0.32101271
-6.82424498 -3.70213318 -0.31701139
-6.82423639 -3.75848389 -0.07722710
-6.82422686 -3.80212665 0.00200010
-6.82415056 -3.71308231 -0.43700969
-6.82413197 -3.71468854 -0.20899500
-6.82407856 -3.70912957 -0.23834470
-6.82399988 -3.85299993 0.06800000
-6.82399988 -3.76900005 -0.05500000
-6.82399988 -3.70199990 -0.33899999
-6.82399988 -3.71600008 -0.45199999
-6.82391214 -3.71595240 -0.20299740
-6.82385015 -3.70491886 -0.27299401
-6.82382965 -3.75490665 -0.08299790
-6.82375145 -3.78771448 -0.02112050
-6.82358265 -3.70777321 -0.25098470
-6.82354546 -3.70975304 -0.23198450
-6.82345724 -3.71224880 -0.22001471
-6.82308912 -3.75204921 -0.09000120
-6.82308817 -3.76304841 -0.06600080
-6.82299995 -3.70700002 -0.40300000
-6.82283115 -3.72645378 -0.15901931
-6.82281160 -3.70989752 -0.41998839
-6.82277203 -3.76587415 -0.06199790
-6.82261372 -3.70679021 -0.25398561
-6.82259369 -3.71277881 -0.43497410
-6.82252121 -3.70755005 -0.24504390
-6.82234001 -3.79618907 -0.00700030
-6.82228994 -3.74618053 -0.10251810
-6.82228041 -3.81015635 0.01400060
-6.82221937 -3.85455894 0.07099190
-6.82200289 -3.71500158 -0.20500010
-6.82200050 -3.74799991 -0.09800000
-6.82200050 -3.70600009 -0.40000001
-6.82200050 -3.71499991 -0.44999999
-6.82199574 -3.70399761 -0.27799979
-6.82195520 -3.70943189 -0.23396420
-6.82192564 -3.90292621 0.11864130
-6.82165527 -3.74481034 -0.10499470
-6.82165480 -3.71135616 -0.22202130
-6.82139826 -3.80263901 0.00377180
-6.82128000 -3.70122075 -0.32624179
-6.82113552 -3.71207380 -0.43200859
-6.82108688 -3.71296191 -0.21519560
-6.82108641 -3.74059057 -0.11529330
-6.82100010 -3.82399988 0.03300000
-6.82100010 -3.78699994 -0.02100000
-6.82100010 -3.74200010 -0.11200000
-6.82100010 -3.73699999 -0.12600000
-6.82100010 -3.73099995 -0.14300001
-6.82100010 -3.72499990 -0.16200000
-6.82100010 -3.72299981 -0.17200001
-6.82094193 -3.73896813 -0.53199542
-6.82090187 -3.70294666 -0.28199589
-6.82087088 -3.70893002 -0.41699210
-6.82084465 -3.70600390 -0.25610811
-6.82061434 -3.70824695 -0.23595209
-6.82034731 -3.90060830 0.11699190
-6.82026052 -3.75314307 -0.08500320
-6.82025385 -3.80614185 0.01000040
-6.82011271 -3.75906181 -0.07400120
-6.82006311 -3.70503402 -0.25900239
-6.82000017 -3.84800005 0.06400000
-6.82000017 -3.76699996 -0.05700000
-6.82000017 -3.71900010 -0.18400000
-6.82000017 -3.70300007 -0.28500000
-6.82000017 -3.70199990 -0.36500001
-6.81996202 -3.71397948 -0.20699890
-6.81994247 -3.73896837 -0.11899900
-6.81981564 -3.71044421 -0.22502691
-6.81977463 -3.70618749 -0.25268301
-6.81973362 -3.71085453 -0.42998320
-6.81964779 -3.70728278 -0.24290670
-6.81943798 -3.75579262 -0.08101710
-6.81925249 -3.75013900 -0.09300350
-6.81920481 -3.72636294 -0.15766750
-6.81899929 -3.81100011 0.01700000
-6.81899929 -3.74699998 -0.10000000
-6.81899929 -3.70199990 -0.35499999
-6.81893730 -3.72096562 -0.17399840
-6.81892967 -3.70196176 -0.35799631
-6.81891918 -3.70741200 -0.23896210
-6.81883860 -3.76291132 -0.06399850
-6.81877232 -3.76087475 -0.06899770
-6.81854057 -3.80274391 0.00499970
-6.81852913 -3.72928953 -0.14501120
-6.81830215 -3.79916859 0.00000000
-6.81815577 -3.71308517 -0.21000481
-6.81812477 -3.80975986 0.01477650
-6.81811762 -3.70506406 -0.26100451
-6.81811333 -3.70960593 -0.22703710
-6.81799984 -3.81900001 0.02800000
-6.81799984 -3.74300003 -0.10700000
-6.81799984 -3.74099970 -0.11400000
-6.81799984 -3.72700000 -0.15500000
-6.81799984 -3.71799994 -0.18600000
-6.81792593 -3.70995975 -0.42699531
-6.81788301 -3.82172990 0.03179520
-6.81758547 -3.70631814 -0.41203541
-6.81712198 -3.70706630 -0.24100430
-6.81700373 -3.73700213 -0.12100010
-6.81699991 -3.89700007 0.11500000
-6.81699991 -3.79299998 -0.01000000
-6.81699991 -3.75099993 -0.08800000
-6.81699991 -3.70099998 -0.34999999
-6.81699991 -3.71700001 -0.46700001
-6.81692553 -3.84804130 0.06471530
-6.81680107 -3.71189189 -0.21199380
-6.81672382 -3.80684543 0.01199950
-6.81663561 -3.75452971 -0.08192150
-6.81642962 -3.70323324 -0.26601681
-6.81641197 -3.70922375 -0.22901380
-6.81629753 -3.72016191 -0.17700770
-6.81622648 -3.75612473 -0.07600250
-6.81613922 -3.74175644 -0.11036870
-6.81607533 -3.70904112 -0.42500469
-6.81601238 -3.70000648 -0.30400050
-6.81599998 -3.90000010 0.11700000
-6.81599998 -3.76699996 -0.05400000
-6.81599998 -3.72799993 -0.14700000
-6.81599998 -3.72299981 -0.16599999
-6.81598997 -3.70599461 -0.24399970
-6.81596756 -3.70652628 -0.40705779
-6.81593466 -3.69996428 -0.30699700
-6.81586599 -3.72592664 -0.15699691
-6.81574297 -3.74785852 -0.09499640
-6.81551695 -3.69973779 -0.31197789
-6.81536341 -3.70527291 -0.24979611
-6.81528091 -3.71115303 -0.21500890
-6.81525993 -3.74514270 -0.10200390
-6.81518793 -3.82010555 0.03100090
-6.81517935 -3.70809746 -0.23200610
-6.81509018 -3.70304918 -0.27100360
-6.81508255 -3.70004463 -0.31600380
-6.81501245 -3.70000696 -0.33300060
-6.81500006 -3.70000005 -0.33800000
-6.81500006 -3.71399999 -0.45199999
-6.81497288 -3.75798488 -0.07099970
-6.81495523 -3.70946527 -0.22197050
-6.81490660 -3.69994950 -0.31899559
-6.81490231 -3.69994688 -0.32899529
-6.81483746 -3.69991183 -0.32599220
-6.81482553 -3.73890400 -0.11699700
-6.81474638 -3.80285859 0.00699970
-6.81426811 -3.70814538 -0.42201650
-6.81416464 -3.76109052 -0.06600160
-6.81414413 -3.71907854 -0.17900380
-6.81414175 -3.70462084 -0.40206739
-6.81413651 -3.73507452 -0.12400250
-6.81413412 -3.72407341 -0.16000320
-6.81400013 -3.85100007 0.06800000
-6.81400013 -3.72099996 -0.16900000
-6.81400013 -3.71300006 -0.20299999
-6.81400013 -3.70199990 -0.38000000
-6.81400013 -3.71600008 -0.46399999
-6.81390047 -3.79722810 -0.00074120
-6.81387329 -3.70993114 -0.21699600
-6.81379271 -3.70188713 -0.27499160
-6.81374502 -3.70740509 -0.23402560
-6.81345558 -3.70393109 -0.25472429
-6.81305170 -3.80802870 0.01400010
-6.81303787 -3.75426364 -0.07847930
-6.81301737 -3.70252013 -0.26447260
-6.81300020 -3.71300006 -0.44900000
-6.81291580 -3.70441031 -0.25095999
-6.81275606 -3.70186734 -0.27799001
-6.81272840 -3.70685220 -0.41998321
-6.81246281 -3.84550238 0.06276230
-6.81235933 -3.70215106 -0.26962101
-6.81227446 -3.71815014 -0.18100730
-6.81219053 -3.75165582 -0.08601500
-6.81207418 -3.70904088 -0.21900240
-6.81201744 -3.70355320 -0.39705929
-6.81199980 -3.74600005 -0.09700000
-6.81199980 -3.72900009 -0.14300001
-6.81199980 -3.72299981 -0.16200000
-6.81199980 -3.72099996 -0.17100000
-6.81199980 -3.71199989 -0.20500000
-6.81199980 -3.70099998 -0.37500000
-6.81174040 -3.74285746 -0.10499600
-6.81170607 -3.73983908 -0.11199520
-6.81157970 -3.79920793 0.00199960
-6.81156254 -3.73730874 -0.11900980
-6.81110334 -3.70733070 -0.22983500
-6.81107426 -3.70104051 -0.28300309
-6.81100035 -3.70600033 -0.41700000
-6.81099987 -3.76500010 -0.05700000
-6.81097651 -3.80398679 0.00900000
-6.81086016 -3.73392344 -0.12599739
-6.81079054 -3.70259690 -0.26088199
-6.81075382 -3.70240951 -0.39504370
-6.81055593 -3.75630665 -0.07400600
-6.81048012 -3.70317388 -0.25594291
-6.81046581 -3.70625353 -0.23901629
-6.81036758 -3.72104168 -0.16755970
-6.81026745 -3.71714592 -0.18400720
-6.81022501 -3.75812411 -0.06900230
-6.81021738 -3.70811820 -0.22200710
-6.81018639 -3.70156240 -0.26745880
-6.81000042 -3.70000005 -0.37000000
-6.80982304 -3.70635366 -0.23502070
-6.80976582 -3.71987200 -0.17399400
-6.80974674 -3.69986248 -0.28698939
-6.80972719 -3.71035266 -0.21263510
-6.80960417 -3.69978499 -0.36597869
-6.80940437 -3.70521998 -0.41402459
-6.80930424 -3.69916534 -0.29001290
-6.80923462 -3.70467138 -0.24104370
-6.80918694 -3.72710252 -0.14500400
-6.80912066 -3.70320249 -0.40327439
-6.80900002 -3.89000010 0.11100000
-6.80900002 -3.88700008 0.10800000
-6.80900002 -3.84499979 0.06300000
-6.80900002 -3.81699991 0.02800000
-6.80900002 -3.80000019 0.00500000
-6.80900002 -3.71300006 -0.45899999
-6.80897665 -3.80190277 0.00708850
-6.80894136 -3.69996810 -0.36299691
-6.80888033 -3.73493409 -0.12199790
-6.80873346 -3.70443368 -0.40906140
-6.80873156 -3.70734191 -0.22550860
-6.80849600 -3.74927330 -0.08800640
-6.80847931 -3.70022178 -0.27982751
-6.80825377 -3.75214005 -0.08100300
-6.80821514 -3.70411682 -0.41201299
-6.80817795 -3.70200920 -0.25993040
-6.80811119 -3.70206022 -0.39200640
-6.80810642 -3.71501756 -0.46498209
-6.80800009 -3.82500005 0.04000000
-6.80800009 -3.74099970 -0.10700000
-6.80800009 -3.73799992 -0.11400000
-6.80800009 -3.71600008 -0.18600000
-6.80800009 -3.69899988 -0.36000001
-6.80800009 -3.74600005 -0.56000000
-6.80796003 -3.73197818 -0.12799920
-6.80794668 -3.69897079 -0.29499760
-6.80788422 -3.71793652 -0.17599700
-6.80785131 -3.70032525 -0.27484089
-6.80746126 -3.70298553 -0.40043041
-6.80744028 -3.70423961 -0.24401580
-6.80743790 -3.70115089 -0.26293969
-6.80741024 -3.69822288 -0.35502139
-6.80738544 -3.69820929 -0.30001700
-6.80725527 -3.79314208 -0.00500020
-6.80719042 -3.80510640 0.01200030
-6.80714083 -3.70779967 -0.21985930
-6.80711651 -3.71006346 -0.21200360
-6.80706263 -3.71203399 -0.45700419
-6.80700064 -3.72099996 -0.16599999
-6.80700064 -3.71199989 -0.19800000
-6.80700064 -3.69799995 -0.34799999
-6.80681896 -3.69790149 -0.30399191
-6.80678320 -3.75388026 -0.07599760
-6.80656481 -3.70316100 -0.24718550
-6.80652905 -3.77029324 -0.04300330
-6.80633307 -3.70118093 -0.39001909
-6.80631447 -3.69855714 -0.28844041
-6.80623913 -3.69812942 -0.30701080
-6.80610037 -3.69840813 -0.29297990
-6.80604935 -3.75602722 -0.07100050
-6.80600023 -3.72600007 -0.14700000
-6.80600023 -3.71399999 -0.18900000
-6.80600023 -3.71499991 -0.46700001
-6.80600023 -3.75000000 -0.56999999
-6.80596924 -3.69998312 -0.26799881
-6.80590487 -3.70294809 -0.40699431
-6.80574942 -3.79530239 0.00000000
-6.80570650 -3.70171547 -0.39537311
-6.80570030 -3.70883656 -0.21499050
-6.80568552 -3.70530963 -0.23275110
-6.80563498 -3.69780159 -0.31198329
-6.80561113 -3.70578837 -0.22898690
-6.80551672 -3.73373485 -0.12399120
-6.80549097 -3.69726682 -0.34302470
-6.80545092 -3.69891429 -0.28600800
-6.80540943 -3.74981380 -0.08421040
-6.80533886 -3.80118942 0.00700030
-6.80533600 -3.71118331 -0.45402241
-6.80532074 -3.70017457 -0.38701829
-6.80531073 -3.71716952 -0.17800809
-6.80506754 -3.69703674 -0.31600320
-6.80501270 -3.69700694 -0.33800071
-6.80500889 -3.69700480 -0.33100039
-6.80499983 -3.73000002 -0.13100000
-6.80499983 -3.72199988 -0.15700001
-6.80499983 -3.71099997 -0.20000000
-6.80499983 -3.74399996 -0.55699998
-6.80498743 -3.69699311 -0.33399940
-6.80489349 -3.70194221 -0.40399370
-6.80475187 -3.69686508 -0.32598811
-6.80449724 -3.69927025 -0.37702760
-6.80438137 -3.69720745 -0.31901789
-6.80429506 -3.74616265 -0.09100400
-6.80423641 -3.70348525 -0.24249759
-6.80423546 -3.69912791 -0.38201320
-6.80422974 -3.69958162 -0.27196920
-6.80400038 -3.70800018 -0.21699999
-6.80399990 -3.83899999 0.05900000
-6.80399990 -3.71900010 -0.16900000
-6.80399990 -3.71099997 -0.20299999
-6.80399990 -3.71000004 -0.45100001
-6.80399990 -3.71399999 -0.46399999
-6.80396605 -3.70252562 -0.25103560
-6.80343294 -3.69914818 -0.27493671
-6.80334282 -3.71318722 -0.19100960
-6.80333614 -3.88569021 0.10793090
-6.80315351 -3.70208383 -0.40200910
-6.80311203 -3.70150900 -0.39952359
-6.80308056 -3.71604419 -0.18100210
-6.80299997 -3.87800002 0.10100000
-6.80299997 -3.76300001 -0.05500000
-6.80299997 -3.72099996 -0.15899999
-6.80296850 -3.70366001 -0.23770490
-6.80277729 -3.75187755 -0.07799750
-6.80271292 -3.69893122 -0.37209371
-6.80263662 -3.70434666 -0.23402190
-6.80244637 -3.79024863 -0.00700050
-6.80234337 -3.73218846 -0.12600639
-6.80224991 -3.70713592 -0.21900800
-6.80208731 -3.76804829 -0.04500060
-6.80200148 -3.74657393 -0.08933330
-6.80200005 -3.84100008 0.06100000
-6.80200005 -3.82100010 0.03700000
-6.80200005 -3.77099991 -0.04100000
-6.80200005 -3.71000004 -0.20500000
-6.80199766 -3.75399852 -0.07400000
-6.80198717 -3.69956326 -0.38829181
-6.80183887 -3.70145631 -0.25603160
-6.80148172 -3.69667101 -0.30239421
-6.80145693 -3.69870448 -0.27997759
-6.80129290 -3.74816132 -0.56702429
-6.80115414 -3.70108390 -0.39700899
-6.80104876 -3.70199800 -0.24609549
-6.80100012 -3.78699994 -0.01200000
-6.80100012 -3.73399997 -0.11900000
-6.80100012 -3.71700001 -0.17100000
-6.80100012 -3.71199989 -0.19300000
-6.80096817 -3.71498251 -0.18299910
-6.80096102 -3.69752264 -0.36705190
-6.80086517 -3.74792528 -0.08599830
-6.80076122 -3.69987011 -0.39398620
-6.80071449 -3.70584416 -0.22199070
-6.80053997 -3.74895477 -0.57016033
-6.80034733 -3.79207873 -0.00299930
-6.80009031 -3.82202911 0.03851180
-6.80004978 -3.74402738 -0.09300070
-6.80000019 -3.88499999 0.10800000
-6.80000019 -3.82800007 0.04700000
-6.80000019 -3.79800010 0.00400000
-6.80000019 -3.78099990 -0.02200000
-6.80000019 -3.77800012 -0.02600000
-6.80000019 -3.72199988 -0.15200000
-6.80000019 -3.70799971 -0.20700000
-6.80000019 -3.71099997 -0.45899999
-6.79993629 -3.69950938 -0.26103601
-6.79992723 -3.69796062 -0.28399700
-6.79978943 -3.70243025 -0.23902780
-6.79975986 -3.69741297 -0.36204040
-6.79968882 -3.69683123 -0.28698689
-6.79962111 -3.73034096 -0.12801170
-6.79958963 -3.83850360 0.05925830
-6.79927778 -3.70928121 -0.45213971
-6.79923868 -3.69567537 -0.31683189
-6.79909563 -3.69950795 -0.39194790
-6.79905415 -3.74902987 -0.08100060
-6.79901505 -3.69590831 -0.30915719
-6.79899979 -3.73600006 -0.11400000
-6.79899979 -3.72700000 -0.13500001
-6.79899979 -3.71600008 -0.17399999
-6.79899979 -3.74399996 -0.55900002
-6.79898453 -3.69653559 -0.35705170
-6.79886103 -3.76092339 -0.05699880
-6.79879141 -3.71288610 -0.18599430
-6.79848242 -3.69671869 -0.29197770
-6.79847813 -3.74584842 -0.08884850
-6.79822111 -3.78768039 -0.01000180
-6.79820681 -3.69602513 -0.29692170
-6.79813099 -3.79407310 0.00000000
-6.79804373 -3.70202351 -0.24100150
-6.79801750 -3.71000981 -0.45600119
-6.79800034 -3.80800009 0.02100000
-6.79800034 -3.73200011 -0.12100000
-6.79800034 -3.70700002 -0.20999999
-6.79800034 -3.70700002 -0.44400001
-6.79800034 -3.74900007 -0.57200003
-6.79796171 -3.72097921 -0.15499911
-6.79795361 -3.75197434 -0.07599950
-6.79786491 -3.69892669 -0.26499471
-6.79785824 -3.76592135 -0.04799900
-6.79783630 -3.69926095 -0.25919089
-6.79776049 -3.69641423 -0.35203940
-6.79758692 -3.70121717 -0.24486139
-6.79752922 -3.76829314 -0.04300340
-6.79750824 -3.69573283 -0.30097821
-6.79717636 -3.69642878 -0.36383420
-6.79699993 -3.83500004 0.05600000
-6.79699993 -3.72900009 -0.13100000
-6.79699993 -3.72600007 -0.13800000
-6.79699993 -3.71000004 -0.19800000
-6.79699993 -3.70400000 -0.22600000
-6.79699993 -3.70099998 -0.41100001
-6.79694796 -3.74267817 -0.09477580
-6.79689407 -3.71159649 -0.19087771
-6.79685497 -3.69837666 -0.38893449
-6.79677439 -3.69587779 -0.30398989
-6.79672861 -3.74585056 -0.56397748
-6.79672289 -3.69539261 -0.34803700
-6.79668236 -3.74980998 -0.07907980
-6.79647923 -3.69526076 -0.34502429
-6.79625320 -3.71213818 -0.18800700
-6.79606724 -3.69503641 -0.30900311
-6.79600000 -3.70600009 -0.44100001
-6.79598331 -3.70899081 -0.45399889
-6.79585457 -3.69792104 -0.26999429
-6.79585171 -3.71991873 -0.15699659
-6.79568052 -3.87468123 0.09930780
-6.79559469 -3.74760103 -0.57014740
-6.79555988 -3.73375821 -0.11699240
-6.79542542 -3.78423643 -0.01400090
-6.79542494 -3.69523072 -0.34002119
-6.79537487 -3.80634880 0.01976550
-6.79537106 -3.69465780 -0.33496901
-6.79533529 -3.69763827 -0.37896290
-6.79533243 -3.69463706 -0.32996759
-6.79531050 -3.69416881 -0.32601491
-6.79528856 -3.70668411 -0.20886789
-6.79522705 -3.69512343 -0.31301039
-6.79522610 -3.77512550 -0.02900100
-6.79522419 -3.69757795 -0.38195640
-6.79521036 -3.69457102 -0.31596330
-6.79513931 -3.75807691 -0.06000120
-6.79508257 -3.69704461 -0.27300331
-6.79500008 -3.77800012 -0.02400000
-6.79500008 -3.70300007 -0.22900000
-6.79500008 -3.74200010 -0.55699998
-6.79496574 -3.69452500 -0.32304591
-6.79479408 -3.74688625 -0.08299750
-6.79465151 -3.69981003 -0.24798730
-6.79435444 -3.69643712 -0.37259290
-6.79414368 -3.76307940 -0.05000110
-6.79408550 -3.71104670 -0.19000240
-6.79402971 -3.82600880 0.04600340
-6.79400587 -3.69853067 -0.25706610
-6.79400015 -3.87299991 0.09800000
-6.79400015 -3.83599997 0.05800000
-6.79400015 -3.70499992 -0.21400000
-6.79400015 -3.70799971 -0.45100001
-6.79397678 -3.69952679 -0.25346199
-6.79386234 -3.74992394 -0.07799840
-6.79354143 -3.74329805 -0.09000720
-6.79348469 -3.74439406 -0.56357360
-6.79346228 -3.69970703 -0.25098011
-6.79341221 -3.78578734 -0.01200250
-6.79327106 -3.69614768 -0.27701101
-6.79317617 -3.70409608 -0.21700560
-6.79313850 -3.72107553 -0.15000300
-6.79308748 -3.76604819 -0.04500060
-6.79300022 -3.87599993 0.10100000
-6.79300022 -3.71900010 -0.15899999
-6.79272556 -3.69518876 -0.28935739
-6.79268503 -3.69386435 -0.32113770
-6.79259586 -3.69409943 -0.34830919
-6.79258251 -3.79132509 -0.00300030
-6.79249907 -3.74272370 -0.56095850
-6.79247093 -3.74625969 -0.56903940
-6.79241562 -3.69688964 -0.27038160
-6.79227543 -3.80415392 0.01800070
-6.79222536 -3.69612312 -0.28000930
-6.79216528 -3.70109010 -0.23600580
-6.79208422 -3.74004650 -0.09800120
-6.79201031 -3.73200560 -0.11900020
-6.79199982 -3.82399988 0.04400000
-6.79199982 -3.81900001 0.03700000
-6.79199982 -3.73699999 -0.10400000
-6.79199982 -3.72299981 -0.14300001
-6.79199982 -3.71499991 -0.17100000
-6.79199982 -3.71000004 -0.19300000
-6.79180574 -3.69368339 -0.33410141
-6.79162788 -3.69401526 -0.31572300
-6.79141092 -3.78767180 -0.00799930
-6.79131126 -3.75713730 -0.06023470
-6.79119396 -3.69810581 -0.25500730
-6.79113245 -3.75951982 -0.05699270
-6.79104805 -3.69502640 -0.28500199
-6.79099989 -3.77900004 -0.02200000
-6.79099989 -3.77600002 -0.02700000
-6.79099989 -3.72799993 -0.12600000
-6.79099989 -3.72600007 -0.13600001
-6.79092884 -3.71996140 -0.15199840
-6.79083014 -3.69501400 -0.36906219
-6.79058790 -3.69323492 -0.33763939
-6.79055309 -3.69346499 -0.34324199
-6.79050827 -3.80503535 0.01965810
-6.79041910 -3.85609651 0.08158950
-6.79038668 -3.78121519 -0.01700100
-6.79033804 -3.74518633 -0.08600430
-6.79025459 -3.69713879 -0.25800970
-6.79019976 -3.77311110 -0.03100090
-6.79018736 -3.70228481 -0.22732210
-6.79007435 -3.69625688 -0.26874429
-6.79005432 -3.74702978 -0.08100060
-6.78999996 -3.83100009 0.05400000
-6.78999996 -3.82599998 0.04700000
-6.78999996 -3.76099992 -0.05300000
-6.78999996 -3.70799971 -0.19499999
-6.78999996 -3.70600009 -0.20800000
-6.78995991 -3.69397831 -0.35999790
-6.78995371 -3.69323039 -0.32905939
-6.78980923 -3.69435215 -0.36493599
-6.78973389 -3.74185348 -0.09299640
-6.78972054 -3.69369030 -0.31004021
-6.78949547 -3.69472575 -0.28897861
-6.78949451 -3.69386339 -0.30207479
-6.78931332 -3.69417024 -0.35701641
-6.78920698 -3.69287634 -0.31868210
-6.78908539 -3.69404626 -0.29200360
-6.78900003 -3.85299993 0.07900000
-6.78900003 -3.79399991 0.00400000
-6.78900003 -3.71399999 -0.17399999
-6.78900003 -3.71099997 -0.18600000
-6.78896236 -3.72197914 -0.14499921
-6.78891373 -3.75738001 -0.05901630
-6.78890657 -3.71894860 -0.15499790
-6.78885460 -3.69992065 -0.24099480
-6.78881645 -3.72989893 -0.12099670
-6.78877306 -3.76387405 -0.04799840
-6.78871727 -3.73839474 -0.10001060
-6.78847408 -3.69465256 -0.28213790
-6.78826618 -3.74143481 -0.56045210
-6.78825235 -3.73513889 -0.10700400
-6.78824377 -3.69247341 -0.32437390
-6.78821898 -3.69357491 -0.29696581
-6.78812075 -3.72706604 -0.12800230
-6.78808355 -3.78804684 -0.00500010
-6.78803110 -3.77156091 -0.03247210
-6.78800011 -3.72399998 -0.13800000
-6.78800011 -3.70499992 -0.20999999
-6.78800011 -3.69600010 -0.26300001
-6.78800011 -3.70499992 -0.44299999
-6.78799009 -3.70699501 -0.19799970
-6.78796148 -3.69297910 -0.30399829
-6.78786087 -3.78361154 -0.01319420
-6.78780842 -3.69644046 -0.38604599
-6.78771734 -3.74039531 -0.55805892
-6.78761101 -3.74333715 -0.56605089
-6.78741360 -3.69310880 -0.35225329
-6.78738308 -3.69920850 -0.24301369
-6.78717327 -3.73900461 -0.09776870
-6.78703642 -3.69501972 -0.38400209
-6.78700018 -3.83200002 0.05600000
-6.78700018 -3.77600002 -0.02400000
-6.78700018 -3.74799991 -0.07600000
-6.78700018 -3.71199989 -0.17600000
-6.78700018 -3.70199990 -0.22600000
-6.78700018 -3.69899988 -0.41100001
-6.78695297 -3.78497386 -0.00999990
-6.78678560 -3.70988274 -0.18799400
-6.78675318 -3.71786499 -0.15699430
-6.78669691 -3.69354630 -0.36713380
-6.78663349 -3.69280052 -0.30898330
-6.78661728 -3.69224811 -0.34992871
-6.78652668 -3.72028852 -0.14701140
-6.78647470 -3.75370908 -0.06399500
-6.78643322 -3.73678923 -0.10202150
-6.78639650 -3.77322054 -0.02900170
-6.78638554 -3.80121613 0.01600090
-6.78635359 -3.69819260 -0.24601281
-6.78634119 -3.74318838 -0.08800440
-6.78627586 -3.69515014 -0.38101551
-6.78612614 -3.74006963 -0.09500180
-6.78612041 -3.69506550 -0.26700470
-6.78608322 -3.70604539 -0.20000251
-6.78604078 -3.69247818 -0.34695101
-6.78599977 -3.82599998 0.04900000
-6.78599977 -3.76999998 -0.03400000
-6.78599977 -3.73200011 -0.11700000
-6.78599977 -3.72799993 -0.12400000
-6.78599977 -3.70099998 -0.22900000
-6.78599977 -3.69799995 -0.40799999
-6.78599977 -3.70400000 -0.44100001
-6.78590631 -3.79310393 0.00358380
-6.78587961 -3.72493410 -0.13099770
-6.78587961 -3.74493337 -0.08299850
-6.78582716 -3.69413018 -0.27775049
-6.78577375 -3.70693374 -0.19596989
-6.78566837 -3.69181943 -0.34198329
-6.78566360 -3.69181681 -0.31298450
-6.78546619 -3.69170952 -0.31597519
-6.78538322 -3.69166422 -0.33796930
-6.78529406 -3.70261526 -0.21497770
-6.78529406 -3.69161582 -0.32096660
-6.78519058 -3.69155979 -0.33296031
-6.78517199 -3.69154930 -0.32995969
-6.78511429 -3.69151807 -0.32495761
-6.78499985 -3.87100005 0.09800000
-6.78499985 -3.81999993 0.04200000
-6.78499985 -3.71099997 -0.17800000
-6.78480387 -3.76089120 -0.04999860
-6.78476477 -3.69487190 -0.26999059
-6.78439093 -3.73610497 -0.10344080
-6.78425932 -3.70514178 -0.20200770
-6.78419018 -3.80210686 0.01800050
-6.78401995 -3.71901107 -0.15000039
-6.78400040 -3.75999951 -0.05252150
-6.78390980 -3.70195031 -0.21699710
-6.78376389 -3.69234133 -0.29406101
-6.78339672 -3.74070215 -0.56183231
-6.78314972 -3.73808193 -0.55601221
-6.78305626 -3.78014588 -0.01700520
-6.78301191 -3.69289303 -0.28166950
-6.78299999 -3.82699990 0.05100000
-6.78299999 -3.80999994 0.03000000
-6.78299999 -3.79099989 0.00200000
-6.78299999 -3.74600005 -0.07900000
-6.78299999 -3.72399998 -0.13300000
-6.78299999 -3.72099996 -0.14300001
-6.78299999 -3.69899988 -0.42300001
-6.78299999 -3.73200011 -0.54299998
-6.78299332 -3.69120860 -0.34387860
-6.78283358 -3.74090791 -0.08999780
-6.78275156 -3.70386434 -0.20399250
-6.78274393 -3.72985935 -0.11899550
-6.78274107 -3.73785734 -0.09799630
-6.78271103 -3.69338751 -0.27402869
-6.78262377 -3.69090390 -0.32259461
-6.78239536 -3.75421882 -0.06200360
-6.78200006 -3.85999990 0.08900000
-6.78200006 -3.84100008 0.06800000
-6.78200006 -3.82200003 0.04400000
-6.78200006 -3.72700000 -0.12600000
-6.78200006 -3.70199990 -0.22000000
-6.78199768 -3.75099874 -0.06700000
-6.78196907 -3.69298339 -0.27699870
-6.78191614 -3.78195333 -0.01199990
-6.78160572 -3.77078080 -0.03099820
-6.78150797 -3.74328065 -0.08600640
-6.78142023 -3.71823025 -0.15200940
-6.78129578 -3.73877764 -0.55835837
-6.78100014 -3.79800010 0.01300000
-6.78100014 -3.73099995 -0.11200000
-6.78100014 -3.70600009 -0.19499999
-6.78097916 -3.69798851 -0.42099869
-6.78090715 -3.70294929 -0.20699720
-6.78084946 -3.69515276 -0.25818449
-6.78077316 -3.77587390 -0.02199930
-6.78056192 -3.69230580 -0.28402349
-6.78016376 -3.81878328 0.04181350
-6.78000021 -3.85100007 0.07900000
-6.78000021 -3.82800007 0.05300000
-6.78000021 -3.75900006 -0.05300000
-6.78000021 -3.70000005 -0.22200000
-6.77999258 -3.69208479 -0.36610761
-6.77994728 -3.71997070 -0.14499889
-6.77941751 -3.73378086 -0.10702240
-6.77939749 -3.82222414 0.04600270
-6.77926350 -3.69168830 -0.28905389
-6.77925587 -3.72814083 -0.12100460
-6.77925348 -3.73084235 -0.54191989
-6.77921104 -3.70490861 -0.19907780
-6.77916670 -3.73909259 -0.09300230
-6.77907133 -3.82516837 0.04901500
-6.77904081 -3.72502232 -0.12900080
-6.77901459 -3.69008708 -0.31183720
-6.77899981 -3.87599993 0.10500000
-6.77899981 -3.79200006 0.00400000
-6.77899981 -3.70199990 -0.20900001
-6.77899981 -3.69099998 -0.36899999
-6.77899981 -3.69400001 -0.39600000
-6.77899981 -3.69700003 -0.41800001
-6.77895164 -3.73897386 -0.55999613
-6.77891493 -3.73595357 -0.09999880
-6.77885342 -3.73591924 -0.55298799
-6.77849102 -3.69926810 -0.22401620
-6.77848196 -3.81627131 0.03900280
-6.77837753 -3.69075036 -0.29305959
-6.77820969 -3.77667427 -0.01900340
-6.77820635 -3.69311261 -0.39301199
-6.77804708 -3.79902649 0.01600010
-6.77799988 -3.87800002 0.10700000
-6.77799988 -3.69400001 -0.26199999
-6.77794790 -3.69044280 -0.34584159
-6.77791500 -3.74095297 -0.08799890
-6.77780962 -3.70253611 -0.20573610
-6.77773762 -3.75185513 -0.06399750
-6.77743721 -3.71824002 -0.14700951
-6.77736044 -3.73423529 -0.10378130
-6.77706242 -3.68956137 -0.32844540
-6.77701426 -3.69000769 -0.35400069
-6.77699995 -3.76799989 -0.03400000
-6.77699995 -3.76500010 -0.03800000
-6.77699995 -3.74600005 -0.07600000
-6.77699995 -3.71000004 -0.17600000
-6.77699995 -3.69000030 -0.35900000
-6.77699995 -3.70900011 -0.47700000
-6.77699995 -3.73200011 -0.54500002
-6.77693748 -3.69896579 -0.22699790
-6.77688789 -3.69048357 -0.29603881
-6.77662563 -3.69034076 -0.34903219
-6.77642059 -3.77867675 -0.01499870
-6.77626085 -3.85861373 0.08885030
-6.77619696 -3.80711055 0.02700080
-6.77618551 -3.72310209 -0.13100360
-6.77607870 -3.70404291 -0.20000230
-6.77603340 -3.73156881 -0.11001680
-6.77600002 -3.81800008 0.04200000
-6.77600002 -3.72600007 -0.12300000
-6.77600002 -3.70099998 -0.21400000
-6.77600002 -3.69199991 -0.26699999
-6.77600002 -3.69799995 -0.42800000
-6.77595377 -3.77297449 -0.02399980
-6.77583647 -3.73387384 -0.55116773
-6.77582979 -3.73690653 -0.09499760
-6.77573156 -3.68985415 -0.34398639
-6.77547264 -3.68922806 -0.33852351
-6.77541590 -3.73622942 -0.55703419
-6.77518892 -3.68910241 -0.31000859
-6.77516127 -3.68908763 -0.31800750
-6.77513123 -3.69093776 -0.28182611
-6.77509260 -3.68905020 -0.31300431
-6.77504301 -3.73402333 -0.10200060
-6.77500010 -3.86500001 0.09600000
-6.77500010 -3.70900011 -0.17800000
-6.77500010 -3.68899989 -0.30300000
-6.77500010 -3.69700003 -0.42500001
-6.77500010 -3.70000005 -0.44000000
-6.77498865 -3.68899369 -0.32299939
-6.77498531 -3.68899155 -0.30599931
-6.77493906 -3.68951106 -0.33504641
-6.77488232 -3.71693516 -0.14999740
-6.77472353 -3.68884945 -0.32698661
-6.77436495 -3.70819950 -0.47402549
-6.77430916 -3.68916798 -0.33001509
-6.77425194 -3.87574983 0.10559760
-6.77424860 -3.70013571 -0.21600790
-6.77417421 -3.73909593 -0.09000230
-6.77408600 -3.70304680 -0.20200260
-6.77400017 -3.85599995 0.08600000
-6.77400017 -3.80800009 0.03000000
-6.77400017 -3.78900003 0.00100000
-6.77400017 -3.75799990 -0.05100000
-6.77400017 -3.71900010 -0.14000000
-6.77400017 -3.69400001 -0.40599999
-6.77375126 -3.77501488 -0.02080900
-6.77347946 -3.74926519 -0.06700470
-6.77331257 -3.73017240 -0.54302502
-6.77322769 -3.77609324 -0.01764820
-6.77310228 -3.69905615 -0.43700659
-6.77299976 -3.85800004 0.08900000
-6.77299976 -3.74399996 -0.07800000
-6.77299976 -3.72199988 -0.13300000
-6.77299976 -3.69099998 -0.38100001
-6.77299976 -3.69700003 -0.42300001
-6.77298498 -3.69299173 -0.40299910
-6.77274084 -3.82348418 0.04968320
-6.77260303 -3.81877613 0.04399740
-6.77254772 -3.69029832 -0.37803051
-6.77240372 -3.72977304 -0.11202320
-6.77228928 -3.82129192 0.04601560
-6.77226496 -3.70214486 -0.20400800
-6.77217388 -3.73509622 -0.09700250
-6.77199984 -3.79600000 0.01300000
-6.77199984 -3.78200030 -0.00800000
-6.77199984 -3.75099993 -0.06200000
-6.77199984 -3.72600007 -0.11900000
-6.77199984 -3.71799994 -0.14300001
-6.77199984 -3.69600010 -0.23400000
-6.77199984 -3.70700002 -0.47200000
-6.77195406 -3.68847704 -0.33845279
-6.77194071 -3.81296659 0.03699970
-6.77177238 -3.73387432 -0.55498141
-6.77171230 -3.69584298 -0.41998219
-6.77164030 -3.76235604 -0.04100390
-6.77149153 -3.87297940 0.10354780
-6.77133894 -3.69018507 -0.28101411
-6.77127218 -3.77497077 -0.01897130
-6.77124500 -3.69813418 -0.43501580
-6.77124357 -3.73213410 -0.10500380
-6.77110243 -3.73271751 -0.55194169
-6.77106762 -3.69003701 -0.28400290
-6.77106762 -3.73103738 -0.54700541
-6.77104664 -3.77002621 -0.02700020
-6.77099991 -3.69799995 -0.22100000
-6.77099991 -3.69199991 -0.39800000
-6.77082777 -3.73690510 -0.09299760
-6.77073622 -3.70085573 -0.20699190
-6.77022600 -3.80312729 0.02500080
-6.77018309 -3.82176471 0.04758940
-6.77004051 -3.73168659 -0.54966092
-6.77001047 -3.69500589 -0.41800070
-6.76999998 -3.87100005 0.10200000
-6.76999998 -3.71999979 -0.13600001
-6.76999998 -3.71099997 -0.16200000
-6.76999998 -3.69499993 -0.23600000
-6.76999998 -3.68899989 -0.36800000
-6.76999998 -3.72799993 -0.54000002
-6.76992702 -3.71788430 -0.14150670
-6.76976061 -3.69686937 -0.43198481
-6.76952934 -3.75529408 -0.05300410
-6.76948166 -3.81427121 0.03900280
-6.76946020 -3.69770527 -0.22398210
-6.76938772 -3.74721456 -0.06900400
-6.76916599 -3.69209027 -0.25700629
-6.76915216 -3.68908310 -0.29100659
-6.76900005 -3.87299991 0.10400000
-6.76900005 -3.74399996 -0.07400000
-6.76900005 -3.70000005 -0.20900001
-6.76900005 -3.68899989 -0.36399999
-6.76900005 -3.70799971 -0.47900000
-6.76883364 -3.69190931 -0.39299029
-6.76880121 -3.77323961 -0.02155010
-6.76874208 -3.73285794 -0.09999620
-6.76872253 -3.72739768 -0.11401220
-6.76861477 -3.72879958 -0.11068220
-6.76855230 -3.69375563 -0.41497251
-6.76825619 -3.68772912 -0.34037349
-6.76807928 -3.69104314 -0.26000309
-6.76801872 -3.71801019 -0.13800040
-6.76800013 -3.78500009 -0.00100000
-6.76800013 -3.76300001 -0.03900000
-6.76800013 -3.72399998 -0.12100000
-6.76800013 -3.71000004 -0.16400000
-6.76800013 -3.68799996 -0.35900000
-6.76800013 -3.69600010 -0.43000001
-6.76790905 -3.73194981 -0.55199260
-6.76788998 -3.77149558 -0.02400320
-6.76786518 -3.69692612 -0.22599550
-6.76745367 -3.86119747 0.09356210
-6.76736069 -3.68819642 -0.35601899
-6.76732063 -3.69200039 -0.39993501
-6.76720190 -3.74911165 -0.06400190
-6.76719713 -3.80511069 0.02700080
-6.76717329 -3.73509550 -0.09500240
-6.76714277 -3.70707846 -0.47701010
-6.76706457 -3.72903585 -0.54500532
-6.76700020 -3.71199989 -0.15700001
-6.76700020 -3.69799995 -0.21200000
-6.76700020 -3.68799996 -0.35200000
-6.76700020 -3.69600010 -0.42699999
-6.76700020 -3.70199990 -0.45500001
-6.76683140 -3.77890587 -0.00999980
-6.76664782 -3.68680835 -0.30098429
-6.76661777 -3.69033718 -0.26502419
-6.76622725 -3.76712608 -0.02900100
-6.76621103 -3.72566676 -0.11702090
-6.76599979 -3.81499982 0.04100000
-6.76599979 -3.80900002 0.03400000
-6.76599979 -3.70900011 -0.16599999
-6.76599979 -3.69600010 -0.22800000
-6.76599979 -3.69000030 -0.26899999
-6.76599979 -3.69799995 -0.43900001
-6.76599979 -3.70900011 -0.48699999
-6.76598883 -3.81117439 0.03646740
-6.76574898 -3.74486089 -0.07099740
-6.76568079 -3.68682623 -0.30498561
-6.76559925 -3.82077408 0.04799720
-6.76528311 -3.81772423 0.04400840
-6.76520443 -3.71711206 -0.14000420
-6.76520157 -3.68710995 -0.34201020
-6.76513004 -3.68707108 -0.30800590
-6.76508760 -3.75304866 -0.05500070
-6.76506090 -3.70603323 -0.47400421
-6.76503801 -3.68702102 -0.33900189
-6.76500273 -3.73100162 -0.10200000
-6.76499987 -3.85400009 0.08600000
-6.76499987 -3.75600004 -0.05000000
-6.76499987 -3.68600011 -0.33199999
-6.76499987 -3.69499993 -0.42500001
-6.76499987 -3.71999979 -0.52200001
-6.76495790 -3.72797680 -0.10899930
-6.76483297 -3.77290678 -0.01999950
-6.76401234 -3.68600678 -0.32200059
-6.76401186 -3.68600678 -0.31700060
-6.76400709 -3.73000431 -0.54900068
-6.76400137 -3.80000091 0.02200000
-6.76399994 -3.86400008 0.09800000
-6.76399994 -3.86199999 0.09500000
-6.76399994 -3.68600011 -0.32499999
-6.76399994 -3.68899989 -0.38100001
-6.76399994 -3.69199991 -0.40500000
-6.76399994 -3.69400001 -0.42199999
-6.76399994 -3.73499990 -0.56199998
-6.76398373 -3.69699121 -0.43699899
-6.76374149 -3.73285747 -0.09799630
-6.76336527 -3.70820022 -0.48402610
-6.76333952 -3.72718716 -0.54202718
-6.76322412 -3.74612451 -0.06700220
-6.76320410 -3.68811131 -0.37801141
-6.76302910 -3.76857305 -0.02700410
-6.76300430 -3.72455311 -0.11901770
-6.76300001 -3.78200030 -0.00300000
-6.76300001 -3.77999997 -0.00800000
-6.76300001 -3.74900007 -0.06200000
-6.76300001 -3.73499990 -0.09100000
-6.76300001 -3.71000004 -0.15899999
-6.76300001 -3.69400001 -0.23300000
-6.76300001 -3.68799996 -0.27399999
-6.76300001 -3.70499992 -0.47200000
-6.76294088 -3.81096697 0.03699970
-6.76272726 -3.76040411 -0.04100440
-6.76264048 -3.75735545 -0.04600440
-6.76209688 -3.69605303 -0.43400621
-6.76200628 -3.72600341 -0.11200010
-6.76200008 -3.74300003 -0.07400000
-6.76200008 -3.71799994 -0.13500001
-6.76200008 -3.71600008 -0.14300001
-6.76200008 -3.69000030 -0.25500000
-6.76200008 -3.69300032 -0.41999999
-6.76200008 -3.71799994 -0.51899999
-6.76200008 -3.72099996 -0.52700001
-6.76187611 -3.69093180 -0.39999270
-6.76159286 -3.77633095 -0.01300110
-6.76133728 -3.72918582 -0.10500520
-6.76131105 -3.80117488 0.02500120
-6.76124907 -3.77746797 -0.01032420
-6.76119947 -3.76511121 -0.03100090
-6.76100016 -3.70900011 -0.16200000
-6.76100016 -3.68700004 -0.28099999
-6.76100016 -3.70700002 -0.48199999
-6.76085377 -3.68692040 -0.28399390
-6.76080942 -3.75089431 -0.05799840
-6.76078129 -3.69288039 -0.41698650
-6.76075554 -3.86168981 0.09615700
-6.76060247 -3.75377917 -0.05299690
-6.76054430 -3.68975139 -0.25798261
-6.76032543 -3.69517756 -0.43202081
-6.76029778 -3.72503662 -0.11450780
-6.76014709 -3.76952410 -0.02199720
-6.76002121 -3.72501135 -0.53900158
-6.76002121 -3.72801161 -0.54600167
-6.76000023 -3.86800003 0.10200000
-6.76000023 -3.70300007 -0.18300000
-6.76000023 -3.70000005 -0.19499999
-6.76000023 -3.69199991 -0.23800001
-6.76000023 -3.68700004 -0.37099999
-6.76000023 -3.70600009 -0.47900000
-6.75999928 -3.73099947 -0.10000000
-6.75981903 -3.81534910 0.04283120
-6.75974655 -3.73285961 -0.09299650
-6.75929213 -3.76680064 -0.02787530
-6.75925303 -3.69713831 -0.20900780
-6.75911713 -3.74559331 -0.06645790
-6.75905180 -3.76874232 -0.02442710
-6.75899982 -3.78299999 -0.00100000
-6.75899982 -3.75500011 -0.04800000
-6.75899982 -3.74399996 -0.06900000
-6.75899982 -3.71900010 -0.12800001
-6.75899982 -3.68600011 -0.36800000
-6.75899982 -3.69199991 -0.41499999
-6.75899982 -3.69400001 -0.42899999
-6.75899982 -3.71600008 -0.51599997
-6.75899982 -3.71900010 -0.52399999
-6.75899982 -3.73300004 -0.55900002
-6.75886297 -3.71692467 -0.13799720
-6.75876570 -3.72565460 -0.54134673
-6.75865889 -3.70781255 -0.16399170
-6.75852203 -3.68528438 -0.29102251
-6.75842237 -3.76325297 -0.03272670
-6.75836086 -3.68819737 -0.26201400
-6.75836086 -3.75720048 -0.04300230
-6.75821781 -3.72712016 -0.10700340
-6.75802231 -3.70501208 -0.47600159
-6.75800323 -3.69900155 -0.19700010
-6.75799990 -3.70199990 -0.18500000
-6.75799990 -3.68499994 -0.35600001
-6.75799990 -3.68499994 -0.36100000
-6.75799990 -3.69899988 -0.45600000
-6.75794268 -3.79696774 0.01999980
-6.75791597 -3.77695298 -0.00999990
-6.75726318 -3.69614410 -0.21200819
-6.75717211 -3.68509412 -0.29800761
-6.75709057 -3.77105045 -0.02000030
-6.75699997 -3.80699992 0.03400000
-6.75699997 -3.77300000 -0.01500000
-6.75699997 -3.74799991 -0.06000000
-6.75699997 -3.74000001 -0.07600000
-6.75699997 -3.71799994 -0.13100000
-6.75699997 -3.71000004 -0.15700001
-6.75699997 -3.70700002 -0.48600000
-6.75699759 -3.68799877 -0.26699990
-6.75677299 -3.72287464 -0.53698188
-6.75661373 -3.76724911 -0.02598020
-6.75656557 -3.76544428 -0.02860050
-6.75645542 -3.68524837 -0.30302039
-6.75635147 -3.75119472 -0.05500290
-6.75625753 -3.72914171 -0.10200390
-6.75621653 -3.71511865 -0.14000450
-6.75617456 -3.73109627 -0.09500240
-6.75606489 -3.72603559 -0.54400522
-6.75601101 -3.69800568 -0.19900030
-6.75600004 -3.70700002 -0.16599999
-6.75600004 -3.69000030 -0.41000000
-6.75600004 -3.71799994 -0.52100003
-6.75582933 -3.68390679 -0.30999219
-6.75573158 -3.72040272 -0.12401340
-6.75558758 -3.68449020 -0.35709900
-6.75545216 -3.68370128 -0.31297460
-6.75531578 -3.72517419 -0.10900510
-6.75525475 -3.79814315 0.02200080
-6.75520468 -3.72311258 -0.11700350
-6.75504732 -3.68402600 -0.31700221
-6.75501251 -3.68400693 -0.32200059
-6.75500011 -3.85899997 0.09500000
-6.75500011 -3.83899999 0.07400000
-6.75500011 -3.69499993 -0.21400000
-6.75500011 -3.68400002 -0.32499999
-6.75500011 -3.68400002 -0.33399999
-6.75500011 -3.68899989 -0.40700001
-6.75500011 -3.69199991 -0.42199999
-6.75497580 -3.70598674 -0.48399830
-6.75460577 -3.69566441 -0.21088710
-6.75422621 -3.74412513 -0.06700220
-6.75404596 -3.75502563 -0.04600030
-6.75400019 -3.73300004 -0.09000000
-6.75400019 -3.70799971 -0.15899999
-6.75400019 -3.69700003 -0.20200001
-6.75400019 -3.68600011 -0.27399999
-6.75400019 -3.68300009 -0.32900000
-6.75400019 -3.71900010 -0.52600002
-6.75400019 -3.73300004 -0.56099999
-6.75391912 -3.76408434 -0.03024300
-6.75382137 -3.71590185 -0.51898628
-6.75358868 -3.68632150 -0.37803289
-6.75338745 -3.86609101 0.10159070
-6.75334263 -3.72442222 -0.54111528
-6.75325680 -3.72114158 -0.53402042
-6.75319672 -3.71865940 -0.12602240
-6.75308132 -3.73804498 -0.07900100
-6.75299978 -3.77999997 -0.00300000
-6.75299978 -3.69099998 -0.41900000
-6.75299978 -3.70499992 -0.48100001
-6.75283432 -3.72690845 -0.10399740
-6.75274134 -3.72885728 -0.09799620
-6.75266123 -3.77381063 -0.01299930
-6.75248003 -3.79326963 0.01800130
-6.75247478 -3.73770928 -0.57395542
-6.75234413 -3.72363830 -0.11198910
-6.75214291 -3.76807976 -0.02200050
-6.75200033 -3.72100019 -0.11900000
-6.75199986 -3.81800008 0.05000000
-6.75199986 -3.81299996 0.04300000
-6.75199986 -3.68499994 -0.28099999
-6.75194168 -3.74896789 -0.05799950
-6.75176764 -3.68487358 -0.28399029
-6.75162506 -3.86411428 0.10004530
-6.75155258 -3.68366480 -0.35908601
-6.75155163 -3.71692324 -0.13092101
-6.75099993 -3.70099998 -0.18300000
-6.75099993 -3.69799995 -0.19499999
-6.75099993 -3.68499994 -0.37099999
-6.75014496 -3.77209139 -0.01461680
-6.75011730 -3.76450777 -0.02699650
-6.75001144 -3.68400621 -0.28800040
-6.75000000 -3.80900002 0.03900000
-6.75000000 -3.78600001 0.00800000
-6.75000000 -3.75299978 -0.04800000
-6.75000000 -3.75000000 -0.05300000
-6.75000000 -3.74200010 -0.06900000
-6.75000000 -3.69499993 -0.20900001
-6.75000000 -3.69000030 -0.23800001
-6.75000000 -3.68400002 -0.36800000
-6.75000000 -3.71700001 -0.52399999
-6.74999619 -3.73099780 -0.09299990
-6.74982834 -3.73625278 -0.57245982
-6.74952030 -3.79473019 0.01999860
-6.74946547 -3.71970534 -0.53095788
-6.74933958 -3.73618793 -0.08100410
-6.74928427 -3.72277284 -0.11193930
-6.74925327 -3.72513962 -0.10700400
-6.74900675 -3.72200394 -0.53800052
-6.74900293 -3.69700170 -0.19700010
-6.74900055 -3.72700024 -0.10000000
-6.74900007 -3.70000005 -0.18500000
-6.74900007 -3.68300009 -0.36300001
-6.74896622 -3.76150823 -0.03285230
-6.74888134 -3.71893501 -0.12099790
-6.74886417 -3.68347144 -0.29103720
-6.74800062 -3.73499990 -0.57099998
-6.74800014 -3.85299993 0.09000000
-6.74800014 -3.74600005 -0.06000000
-6.74800014 -3.73799992 -0.57599998
-6.74798918 -3.68299413 -0.29599950
-6.74797630 -3.69398689 -0.21099921
-6.74772263 -3.68284869 -0.29998770
-6.74767685 -3.68282366 -0.35798281
-6.74762201 -3.83570147 0.07176020
-6.74713659 -3.68307471 -0.30300611
-6.74706173 -3.76167297 -0.03070830
-6.74701071 -3.69600582 -0.19900030
-6.74700022 -3.78999996 0.01500000
-6.74700022 -3.77099991 -0.01500000
-6.74700022 -3.73799992 -0.07600000
-6.74700022 -3.68799996 -0.40900001
-6.74700022 -3.69300032 -0.44400001
-6.74700022 -3.69600010 -0.45300001
-6.74700022 -3.71199989 -0.51300001
-6.74698591 -3.71599221 -0.13099970
-6.74680328 -3.72776604 -0.09771430
-6.74665546 -3.71640420 -0.12759531
-6.74635077 -3.80719042 0.03800040
-6.74617147 -3.68209362 -0.31000790
-6.74608517 -3.72904754 -0.09500120
-6.74601555 -3.71700859 -0.52800119
-6.74600267 -3.72300172 -0.10900010
-6.74599981 -3.81499982 0.04700000
-6.74599981 -3.80900002 0.04100000
-6.74599981 -3.73399997 -0.08300000
-6.74599981 -3.73099995 -0.08800000
-6.74599981 -3.70400000 -0.16599999
-6.74599981 -3.69799995 -0.18799999
-6.74599981 -3.68700004 -0.24500000
-6.74599981 -3.68400002 -0.26400000
-6.74588156 -3.71993446 -0.11599800
-6.74583054 -3.68190765 -0.31499210
-6.74581575 -3.71830869 -0.53077960
-6.74576569 -3.71987081 -0.53498143
-6.74534607 -3.72519112 -0.10200520
-6.74519396 -3.71710706 -0.12400360
-6.74499989 -3.83699989 0.07400000
-6.74499989 -3.70000005 -0.17800000
-6.74499989 -3.69499993 -0.20200001
-6.74499989 -3.68899989 -0.22800000
-6.74499989 -3.68099999 -0.32900000
-6.74499989 -3.69199991 -0.44100001
-6.74432373 -3.78262091 0.00599940
-6.74407673 -3.77718234 -0.00277540
-6.74399996 -3.70199990 -0.16900000
-6.74399996 -3.69700003 -0.19000000
-6.74399996 -3.68099999 -0.33899999
-6.74390602 -3.85244012 0.09144820
-6.74389505 -3.71349287 -0.13401780
-6.74389219 -3.80493903 0.03599940
-6.74385071 -3.68591833 -0.24999450
-6.74371958 -3.79084229 0.01799930
-6.74353313 -3.73229527 -0.56804502
-6.74344587 -3.73569322 -0.57395291
-6.74341202 -3.71082950 -0.51186752
-6.74325275 -3.73614001 -0.07900300
-6.74317074 -3.75765228 -0.03600620
-6.74301195 -3.68800664 -0.23000041
-6.74300003 -3.86100006 0.09900000
-6.74300003 -3.85800004 0.09700000
-6.74300003 -3.81599998 0.05000000
-6.74300003 -3.75399995 -0.04100000
-6.74300003 -3.72900009 -0.09100000
-6.74300003 -3.69099998 -0.21600001
-6.74274111 -3.71647286 -0.52877003
-6.74274063 -3.72085690 -0.11199570
-6.74264097 -3.72382569 -0.10348230
-6.74239397 -3.71821713 -0.11900700
-6.74234486 -3.72719049 -0.09700500
-6.74227524 -3.73397183 -0.57142448
-6.74223471 -3.71812940 -0.53301859
-6.74219894 -3.71510935 -0.52501547
-6.74214554 -3.69907951 -0.18100390
-6.74206543 -3.85015225 0.08902180
-6.74203205 -3.76301789 -0.02700010
-6.74200010 -3.69300032 -0.20400000
-6.74182892 -3.68545175 -0.24770381
-6.74154902 -3.71520066 -0.12597290
-6.74141026 -3.75967121 -0.03199720
-6.74135303 -3.69019318 -0.21801139
-6.74101400 -3.73228192 -0.56898969
-6.74100018 -3.84800005 0.08700000
-6.74100018 -3.79500008 0.02500000
-6.74100018 -3.78399992 0.00800000
-6.74100018 -3.76999998 -0.01300000
-6.74100018 -3.74799991 -0.05300000
-6.74100018 -3.68700004 -0.23300000
-6.74037790 -3.71220803 -0.13600761
-6.74026394 -3.69214487 -0.20600811
-6.74026251 -3.70233178 -0.16773930
-6.73999977 -3.83100009 0.06900000
-6.73999977 -3.70300007 -0.16200000
-6.73999977 -3.68899989 -0.22100000
-6.73999977 -3.68899989 -0.43399999
-6.73974800 -3.73386073 -0.08099700
-6.73945427 -3.71749616 -0.11788160
-6.73940659 -3.69883180 -0.17822120
-6.73939705 -3.80522442 0.03800220
-6.73930264 -3.75472546 -0.03900750
-6.73916006 -3.73008871 -0.56501341
-6.73908186 -3.72504520 -0.10000120
-6.73899984 -3.84999990 0.09000000
-6.73899984 -3.70000005 -0.17299999
-6.73899984 -3.68099999 -0.36300001
-6.73899317 -3.73299623 -0.57099950
-6.73894787 -3.71697140 -0.12099910
-6.73893929 -3.71896696 -0.11399900
-6.73891544 -3.71595359 -0.52999330
-6.73873901 -3.69085693 -0.20899190
-6.73846674 -3.71325731 -0.52303618
-6.73844671 -3.78099442 0.00507240
-6.73841810 -3.70994782 -0.51216012
-6.73839617 -3.71311641 -0.12796959
-6.73822832 -3.71012568 -0.13800471
-6.73799992 -3.83299971 0.07100000
-6.73799992 -3.73799992 -0.07000000
-6.73799992 -3.70199990 -0.16400000
-6.73799992 -3.69899988 -0.17600000
-6.73799992 -3.68000007 -0.36000001
-6.73799992 -3.68800020 -0.43099999
-6.73781300 -3.75189614 -0.04299880
-6.73776245 -3.79586625 0.02699900
-6.73773384 -3.75591564 -0.03644890
-6.73768377 -3.68885636 -0.21996550
-6.73753500 -3.76029873 -0.02900230
-6.73753071 -3.68443418 -0.25028211
-6.73752260 -3.80229521 0.03400260
-6.73700142 -3.75700068 -0.03400000
-6.73699999 -3.81299996 0.04800000
-6.73699999 -3.78800011 0.01500000
-6.73699999 -3.77699995 -0.00100000
-6.73699999 -3.76200008 -0.02500000
-6.73699999 -3.73499990 -0.07600000
-6.73699999 -3.72900009 -0.08800000
-6.73699999 -3.70400000 -0.15700001
-6.73699999 -3.68199992 -0.26400000
-6.73699999 -3.68000007 -0.35499999
-6.73699999 -3.69099998 -0.44299999
-6.73692322 -3.68995810 -0.21099760
-6.73674631 -3.77285838 -0.00599980
-6.73634195 -3.69618750 -0.18800950
-6.73600006 -3.74499989 -0.05500000
-6.73600006 -3.73200011 -0.08400000
-6.73600006 -3.68700004 -0.22800000
-6.73600006 -3.68499994 -0.24500000
-6.73600006 -3.67899990 -0.33800000
-6.73600006 -3.68700004 -0.42800000
-6.73599911 -3.72299957 -0.10200000
-6.73594856 -3.71497154 -0.12399910
-6.73592043 -3.70895600 -0.13999830
-6.73566103 -3.76681042 -0.01599920
-6.73562098 -3.79350901 0.02452820
-6.73542690 -3.71368361 -0.52695519
-6.73516989 -3.71144032 -0.13094500
-6.73501301 -3.67800713 -0.32600060
-6.73500013 -3.86999989 0.11100000
-6.73500013 -3.85599995 0.09700000
-6.73500013 -3.85299993 0.09400000
-6.73500013 -3.79200006 0.02200000
-6.73500013 -3.78099990 0.00600000
-6.73500013 -3.69799995 -0.17800000
-6.73500013 -3.69499993 -0.19000000
-6.73500013 -3.68899989 -0.21400000
-6.73500013 -3.67800021 -0.33100000
-6.73500013 -3.67899990 -0.34099999
-6.73500013 -3.67899990 -0.34599999
-6.73500013 -3.69000030 -0.44100001
-6.73500013 -3.72799993 -0.56300002
-6.73498011 -3.71643734 -0.11598240
-6.73487377 -3.71193004 -0.51999021
-6.73456430 -3.75287199 -0.04100950
-6.73453474 -3.79730153 0.02900230
-6.73452616 -3.73029160 -0.56804442
-6.73434019 -3.73618865 -0.07200360
-6.73432922 -3.82840109 0.06735670
-6.73404789 -3.70202637 -0.15900110
-6.73400021 -3.68600011 -0.23300000
-6.73387289 -3.68393040 -0.24899530
-6.73367834 -3.71337461 -0.12601270
-6.73338127 -3.70765924 -0.14298689
-6.73330736 -3.73687959 -0.06971880
-6.73308420 -3.74904728 -0.04600060
-6.73305225 -3.76665092 -0.01495580
-6.73299980 -3.72700000 -0.09000000
-6.73299980 -3.72099996 -0.10400000
-6.73299980 -3.68300009 -0.25200000
-6.73299980 -3.70799971 -0.50999999
-6.73296833 -3.69898272 -0.17099920
-6.73284483 -3.73191404 -0.07899820
-6.73280382 -3.69689250 -0.18099470
-6.73270941 -3.77383709 -0.00399980
-6.73268843 -3.80182409 0.03599830
-6.73257685 -3.79888988 0.03200750
-6.73235273 -3.68999171 -0.20847930
-6.73215103 -3.71218562 -0.12804089
-6.73214102 -3.75407863 -0.03700080
-6.73201227 -3.79300642 0.02500000
-6.73201132 -3.68800616 -0.21800040
-6.73199987 -3.76799989 -0.01300000
-6.73199987 -3.69099998 -0.20400000
-6.73199987 -3.68199992 -0.40200001
-6.73196697 -3.70987916 -0.13295980
-6.73161650 -3.71373320 -0.12194940
-6.73154783 -3.70975089 -0.51796520
-6.73134089 -3.75919008 -0.02700140
-6.73130274 -3.71461511 -0.11898770
-6.73120880 -3.70111489 -0.16100501
-6.73115015 -3.71208262 -0.52501172
-6.73114586 -3.71104574 -0.52098852
-6.73099995 -3.82900000 0.06900000
-6.73099995 -3.76999998 -0.00900000
-6.73099995 -3.73399997 -0.07400000
-6.73099995 -3.69199991 -0.46000001
-6.73065948 -3.70581269 -0.14499269
-6.73063374 -3.69779921 -0.17399050
-6.73054552 -3.75127888 -0.04207080
-6.73031998 -3.70820642 -0.13626321
-6.73013163 -3.72807312 -0.56501108
-6.73009348 -3.69005156 -0.20600291
-6.73005295 -3.70709062 -0.14128339
-6.73000002 -3.81399989 0.05300000
-6.73000002 -3.76399994 -0.01800000
-6.73000002 -3.68700004 -0.22100000
-6.73000002 -3.67800021 -0.28299999
-6.73000002 -3.68700004 -0.43300000
-6.72900009 -3.77800012 0.00300000
-6.72900009 -3.73600006 -0.06900000
-6.72900009 -3.70000005 -0.16400000
-6.72900009 -3.67800021 -0.36000001
-6.72897911 -3.71123338 -0.12920040
-6.72895670 -3.73150039 -0.07846210
-6.72894955 -3.82742214 0.06762270
-6.72871971 -3.79440570 0.02700290
-6.72863817 -3.68580151 -0.43097681
-6.72857857 -3.69131756 -0.45803940
-6.72839785 -3.74622154 -0.04800280
-6.72839737 -3.71266747 -0.12098920
-6.72825146 -3.68913770 -0.20900780
-6.72810507 -3.77105904 -0.00600010
-6.72800016 -3.73000002 -0.08100000
-6.72800016 -3.69700003 -0.17600000
-6.72800016 -3.67800021 -0.35499999
-6.72790051 -3.70794511 -0.51499230
-6.72778749 -3.71156907 -0.12581380
-6.72766733 -3.68481779 -0.22498889
-6.72759962 -3.70942402 -0.51975483
-6.72755432 -3.68777800 -0.21249411
-6.72740412 -3.70582795 -0.14290670
-6.72740269 -3.70422149 -0.14700881
-6.72735357 -3.69740081 -0.17288180
-6.72709417 -3.79278207 0.02534600
-6.72700024 -3.85200000 0.09400000
-6.72700024 -3.78999996 0.02200000
-6.72700024 -3.75999999 -0.02500000
-6.72700024 -3.70199990 -0.15700001
-6.72700024 -3.69400001 -0.18799999
-6.72700024 -3.67700005 -0.34299999
-6.72700024 -3.68199992 -0.41299999
-6.72700024 -3.68499994 -0.42800000
-6.72700024 -3.68799996 -0.44299999
-6.72696781 -3.76402211 -0.01703570
-6.72692633 -3.79552245 0.02900400
-6.72685862 -3.75192094 -0.03899920
-6.72684765 -3.68991637 -0.45498970
-6.72637510 -3.76946592 -0.00834550
-6.72633743 -3.81202245 0.05156070
-6.72617531 -3.75710320 -0.02823910
-6.72617006 -3.79809594 0.03300080
-6.72599983 -3.86800003 0.11100000
-6.72599983 -3.86500001 0.10800000
-6.72599983 -3.72299981 -0.09500000
-6.72597456 -3.70688367 -0.13795850
-6.72590637 -3.68394876 -0.22799680
-6.72585821 -3.70947385 -0.13301700
-6.72570419 -3.71183681 -0.12299460
-6.72520876 -3.74711633 -0.04600140
-6.72501659 -3.67600942 -0.32800081
-6.72499990 -3.68899989 -0.20200001
-6.72499990 -3.68700004 -0.21400000
-6.72499990 -3.67600012 -0.32400000
-6.72499990 -3.67600012 -0.33100000
-6.72499990 -3.68899989 -0.45300001
-6.72499657 -3.73399830 -0.07200000
-6.72462702 -3.70534539 -0.51204771
-6.72453117 -3.70029235 -0.15901250
-6.72425556 -3.84742951 0.09196250
-6.72419262 -3.73010707 -0.07900230
-6.72414017 -3.86606693 0.10948040
-6.72399998 -3.69700003 -0.17100000
-6.72399998 -3.68300009 -0.23000000
-6.72398615 -3.70299220 -0.14999969
-6.72360229 -3.74377847 -0.05099700
-6.72357178 -3.79506707 0.03059190
-6.72329473 -3.70550895 -0.13994370
-6.72328424 -3.74524450 -0.04835140
-6.72326136 -3.70814395 -0.51902020
-6.72310925 -3.70604634 -0.51427948
-6.72303629 -3.79101992 0.02400010
-6.72300005 -3.80999994 0.05000000
-6.72300005 -3.76900005 -0.00800000
-6.72300005 -3.68799996 -0.20400000
-6.72300005 -3.67700005 -0.27599999
-6.72294664 -3.70997047 -0.12599900
-6.72294235 -3.74785399 -0.04420350
-6.72285509 -3.70802307 -0.13503730
-6.72265530 -3.72080898 -0.09799500
-6.72262669 -3.68534350 -0.43804079
-6.72214794 -3.68619561 -0.44159019
-6.72214079 -3.69907737 -0.16100340
-6.72200012 -3.73699999 -0.06300000
-6.72200012 -3.68000007 -0.40099999
-6.72200012 -3.71199989 -0.53399998
-6.72186518 -3.74892521 -0.04099920
-6.72168493 -3.70672750 -0.51664042
-6.72166157 -3.75681090 -0.02699860
-6.72125196 -3.69613862 -0.17300650
-6.72117949 -3.70109868 -0.15200409
-6.72107458 -3.67604065 -0.28000310
-6.72101068 -3.70400620 -0.50900078
-6.72100019 -3.76200008 -0.01800000
-6.72100019 -3.73200011 -0.07400000
-6.72100019 -3.68400002 -0.43500000
-6.72100019 -3.69000030 -0.46000001
-6.72069168 -3.70372820 -0.14295091
-6.72061491 -3.67578936 -0.28298381
-6.72055769 -3.79231501 0.02700220
-6.72039270 -3.84682536 0.09174100
-6.72033882 -3.70781517 -0.13155340
-6.72020340 -3.70461607 -0.51262170
-6.72019196 -3.70620894 -0.13804500
-6.72006178 -3.74503422 -0.04800040
-6.72002363 -3.81039000 0.05108800
-6.71999979 -3.72799993 -0.08200000
-6.71999979 -3.69799995 -0.16400000
-6.71999979 -3.68400002 -0.22300000
-6.71999979 -3.68099999 -0.41800001
-6.71997499 -3.79398561 0.03099990
-6.71990252 -3.71094608 -0.12099820
-6.71975994 -3.70886755 -0.12799540
-6.71974373 -3.70163012 -0.14758900
-6.71901798 -3.68900990 -0.45700121
-6.71899986 -3.84200001 0.08700000
-6.71899986 -3.74099970 -0.05300000
-6.71899986 -3.73300004 -0.07000000
-6.71899986 -3.71900010 -0.10000000
-6.71899986 -3.67499995 -0.36500001
-6.71878576 -3.71088171 -0.53198302
-6.71847010 -3.79260588 0.02867730
-6.71839952 -3.70211816 -0.14496550
-6.71828890 -3.68315864 -0.22500969
-6.71825314 -3.70013952 -0.15400580
-6.71799994 -3.73499990 -0.06500000
-6.71799994 -3.68000007 -0.23999999
-6.71799994 -3.67499995 -0.30399999
-6.71799994 -3.68300009 -0.43000001
-6.71799994 -3.68600011 -0.44299999
-6.71798754 -3.70199323 -0.50699908
-6.71736097 -3.74357915 -0.04930770
-6.71735859 -3.68019676 -0.41302210
-6.71724272 -3.70423675 -0.14004681
-6.71700001 -3.72099996 -0.09600000
-6.71700001 -3.67400002 -0.36199999
-6.71700001 -3.71799994 -0.55100000
-6.71698284 -3.68799067 -0.45499879
-6.71697044 -3.70698357 -0.12999940
-6.71678925 -3.74492192 -0.04511240
-6.71678114 -3.68188000 -0.22799259
-6.71668530 -3.70555854 -0.13550989
-6.71664333 -3.68180442 -0.42797729
-6.71633148 -3.67918134 -0.41002029
-6.71628857 -3.70415926 -0.51402211
-6.71626997 -3.68459940 -0.43995219
-6.71624994 -3.84242702 0.08896360
-6.71622229 -3.69812274 -0.15700521
-6.71619558 -3.70300484 -0.14235070
-6.71600008 -3.76200008 -0.01600000
-6.71600008 -3.75399995 -0.02900000
-6.71600008 -3.69000030 -0.18799999
-6.71600008 -3.68400002 -0.21400000
-6.71600008 -3.70900011 -0.52899998
-6.71542740 -3.74223828 -0.05100320
-6.71528530 -3.70015669 -0.50402141
-6.71523905 -3.70271039 -0.51078153
-6.71514606 -3.67807961 -0.40800881
-6.71507168 -3.70126653 -0.50687438
-6.71504116 -3.68102264 -0.23000140
-6.71501112 -3.68100619 -0.42500070
-6.71500015 -3.73099995 -0.07200000
-6.71500015 -3.68700004 -0.20200001
-6.71500015 -3.68700004 -0.45199999
-6.71433258 -3.68318272 -0.43702170
-6.71429682 -3.70516396 -0.13300590
-6.71400023 -3.68300009 -0.21600001
-6.71400023 -3.69400001 -0.48400000
-6.71396637 -3.69698119 -0.15899920
-6.71383333 -3.78921270 0.02566250
-6.71370459 -3.67983794 -0.23198980
-6.71365976 -3.71881175 -0.09799500
-6.71337700 -3.68020701 -0.42302379
-6.71336079 -3.84243536 0.08903910
-6.71315384 -3.68908477 -0.19000439
-6.71310854 -3.79106140 0.02900050
-6.71299982 -3.77099991 0.00000000
-6.71299982 -3.73499990 -0.06300000
-6.71299982 -3.67499995 -0.27500001
-6.71299982 -3.71000004 -0.53399998
-6.71292543 -3.71595907 -0.54899400
-6.71277475 -3.69797397 -0.15432119
-6.71262217 -3.69924021 -0.14996921
-6.71258163 -3.67431235 -0.27758151
-6.71255779 -3.74077129 -0.05180230
-6.71251106 -3.67855644 -0.24079160
-6.71223593 -3.69913006 -0.50201768
-6.71220779 -3.67911386 -0.42001301
-6.71199989 -3.83800006 0.08400000
-6.71199989 -3.80699992 0.04900000
-6.71199989 -3.80100012 0.04300000
-6.71199989 -3.74799991 -0.03700000
-6.71199989 -3.69300032 -0.17100000
-6.71199989 -3.68199992 -0.21799999
-6.71199989 -3.68199992 -0.43500000
-6.71199989 -3.68499994 -0.44999999
-6.71190643 -3.67894840 -0.23499671
-6.71185875 -3.70157647 -0.14506181
-6.71183681 -3.76043177 -0.01653390
-6.71169138 -3.69583058 -0.16199251
-6.71154785 -3.70375037 -0.13499090
-6.71133614 -3.67418361 -0.28001401
-6.71101904 -3.69965720 -0.50524467
-6.71099997 -3.83999991 0.08600000
-6.71099997 -3.70099998 -0.14200000
-6.71099997 -3.69300032 -0.48100001
-6.71047878 -3.84227443 0.08900640
-6.71000004 -3.73600006 -0.05800000
-6.71000004 -3.73099995 -0.07000000
-6.71000004 -3.71700001 -0.10000000
-6.71000004 -3.67800021 -0.23700000
-6.71000004 -3.67300010 -0.36399999
-6.71000004 -3.67300010 -0.37099999
-6.71000004 -3.67300010 -0.37400001
-6.71000004 -3.68400002 -0.44700000
-6.70991421 -3.67795300 -0.41499469
-6.70988560 -3.69783497 -0.15195210
-6.70984077 -3.70091224 -0.50898790
-6.70969009 -3.69782925 -0.49897701
-6.70965052 -3.70046210 -0.14705810
-6.70947409 -3.70870948 -0.53095841
-6.70914650 -3.69649577 -0.15514570
-6.70911551 -3.69506359 -0.16400281
-6.70901346 -3.70293546 -0.13709080
-6.70900011 -3.80800009 0.05200000
-6.70900011 -3.69199991 -0.17299999
-6.70900011 -3.68099999 -0.43000001
-6.70897007 -3.68251276 -0.21372759
-6.70893764 -3.71396518 -0.54599500
-6.70893002 -3.69537377 -0.16005030
-6.70864487 -3.74038696 -0.04972840
-6.70804548 -3.74302554 -0.04400030
-6.70801783 -3.70500970 -0.13100030
-6.70800018 -3.75999999 -0.01500000
-6.70800018 -3.73300004 -0.06500000
-6.70800018 -3.71000004 -0.11400000
-6.70800018 -3.68799996 -0.18700001
-6.70800018 -3.67800021 -0.23899999
-6.70800018 -3.67199993 -0.36199999
-6.70800018 -3.71000004 -0.53899997
-6.70800018 -3.71600008 -0.55100000
-6.70728207 -3.69615602 -0.49602091
-6.70723391 -3.69312930 -0.16600581
-6.70719147 -3.74510694 -0.03900110
-6.70708513 -3.69904709 -0.50600648
-6.70701694 -3.68000937 -0.42700109
-6.70699978 -3.78699994 0.02600000
-6.70699978 -3.67700005 -0.24200000
-6.70699978 -3.67100000 -0.29200000
-6.70699978 -3.67100000 -0.35699999
-6.70697451 -3.67698622 -0.40999851
-6.70696163 -3.69908166 -0.14904360
-6.70685768 -3.76792002 -0.00200000
-6.70663071 -3.70035744 -0.14393090
-6.70647812 -3.70126438 -0.14001000
-6.70636559 -3.73676109 -0.05501120
-6.70599985 -3.78399992 0.02200000
-6.70599985 -3.72900009 -0.07200000
-6.70599985 -3.68199992 -0.21300000
-6.70599985 -3.70700002 -0.52800000
-6.70599937 -3.75599980 -0.02100000
-6.70579767 -3.67043686 -0.35404211
-6.70576906 -3.67887330 -0.22999211
-6.70574999 -3.67779708 -0.23465340
-6.70569324 -3.67583179 -0.40798131
-6.70548153 -3.79727268 0.04000290
-6.70547962 -3.71126533 -0.54303879
-6.70541716 -3.70323038 -0.13300830
-6.70516014 -3.67908740 -0.42501009
-6.70499992 -3.84400010 0.09400000
-6.70499992 -3.75299978 -0.02500000
-6.70499992 -3.67499995 -0.24699999
-6.70499992 -3.67000008 -0.29600000
-6.70499992 -3.70799971 -0.53600001
-6.70491982 -3.69195580 -0.16899800
-6.70473242 -3.69530177 -0.15697031
-6.70473099 -3.68685222 -0.18899240
-6.70472431 -3.69484830 -0.49397969
-6.70456076 -3.70831013 -0.11700980
-6.70454597 -3.69730091 -0.50304103
-6.70450306 -3.71372461 -0.54895937
-6.70434761 -3.69729447 -0.15205321
-6.70426941 -3.67014766 -0.34901401
-6.70400381 -3.70000219 -0.14200009
-6.70400000 -3.76900005 0.00000000
-6.70400000 -3.67000008 -0.33700001
-6.70400000 -3.67000008 -0.34200001
-6.70400000 -3.69199991 -0.48400000
-6.70398903 -3.68099427 -0.21599969
-6.70398283 -3.66999078 -0.34499910
-6.70395803 -3.67797709 -0.23199850
-6.70365381 -3.67835879 -0.42204109
-6.70331573 -3.66917276 -0.33201569
-6.70303917 -3.74102163 -0.04600030
-6.70300007 -3.79900002 0.04300000
-6.70300007 -3.77900004 0.01700000
-6.70300007 -3.74600005 -0.03700000
-6.70300007 -3.72399998 -0.07900000
-6.70300007 -3.68799996 -0.18000001
-6.70300007 -3.68300009 -0.44900000
-6.70300007 -3.71600008 -0.55599999
-6.70295954 -3.67697763 -0.41999751
-6.70274639 -3.75685763 -0.01799930
-6.70274019 -3.73785520 -0.05099800
-6.70264864 -3.69080663 -0.17099109
-6.70250988 -3.69372964 -0.15898840
-6.70233393 -3.69166255 -0.16631950
-6.70227575 -3.69315219 -0.49102029
-6.70226669 -3.68514633 -0.19200760
-6.70219612 -3.73466659 -0.05801040
-6.70201063 -3.75535154 -0.02017780
-6.70200014 -3.80399990 0.04900000
-6.70200014 -3.74300003 -0.04200000
-6.70200014 -3.73200011 -0.06200000
-6.70200014 -3.71199989 -0.10500000
-6.70200014 -3.68000007 -0.21799999
-6.70200014 -3.69099998 -0.48100001
-6.70200014 -3.70400000 -0.52600002
-6.70200014 -3.70900011 -0.54000002
-6.70199156 -3.67699528 -0.23499970
-6.70198774 -3.69599342 -0.50099897
-6.70181608 -3.67689896 -0.41698861
-6.70159817 -3.69877839 -0.14499129
-6.70124674 -3.70713639 -0.11900440
-6.70122576 -3.78125572 0.01900630
-6.70121670 -3.69622278 -0.15405101
-6.70100021 -3.78399992 0.02400000
-6.70100021 -3.77500010 0.01200000
-6.70100021 -3.75299978 -0.02300000
-6.70100021 -3.68199992 -0.20600000
-6.70100021 -3.67100000 -0.37099999
-6.70100021 -3.67100000 -0.37400001
-6.70100021 -3.68199992 -0.44700000
-6.70065832 -3.73513889 -0.05579810
-6.70051479 -3.71173120 -0.54596043
-6.70051289 -3.69650245 -0.15058251
-6.70022964 -3.78228688 0.02156250
-6.70016384 -3.68409014 -0.19400470
-6.70011091 -3.69006157 -0.17300290
-6.70009327 -3.69250035 -0.16097820
-6.70000029 -3.71399999 -0.55299997
-6.69999981 -3.80599999 0.05200000
-6.69999981 -3.71700001 -0.09300000
-6.69999981 -3.67600012 -0.23700000
-6.69999981 -3.67300010 -0.39800000
-6.69999981 -3.68700004 -0.47099999
-6.69982195 -3.68690228 -0.18199520
-6.69974518 -3.84240413 0.09348900
-6.69963360 -3.69179821 -0.48897329
-6.69956064 -3.79672050 0.04100700
-6.69953299 -3.69474268 -0.49796531
-6.69917965 -3.69709897 -0.14700390
-6.69901752 -3.69275236 -0.49224651
-6.69899988 -3.87500000 0.12400000
-6.69899988 -3.72199988 -0.08100000
-6.69899988 -3.70799971 -0.11400000
-6.69899988 -3.67199993 -0.25799999
-6.69899988 -3.67000008 -0.28200001
-6.69899988 -3.70799971 -0.53799999
-6.69894886 -3.70909381 -0.54159319
-6.69894028 -3.79396605 0.03799970
-6.69890785 -3.75396490 -0.02112910
-6.69885302 -3.73891783 -0.04799890
-6.69884396 -3.70491362 -0.12099720
-6.69880629 -3.67189384 -0.39498860
-6.69880199 -3.68089151 -0.20899381
-6.69877958 -3.69398189 -0.15604150
-6.69852781 -3.74329519 -0.03900310
-6.69836569 -3.73276114 -0.06001220
-6.69835138 -3.68319345 -0.19601031
-6.69834185 -3.68818831 -0.17600900
-6.69833803 -3.76619029 -0.00200010
-6.69827271 -3.73559427 -0.05299420
-6.69821882 -3.71012139 -0.10700350
-6.69814825 -3.69104981 -0.16392350
-6.69799995 -3.74099970 -0.04400000
-6.69799995 -3.67199993 -0.26100001
-6.69799995 -3.68499994 -0.46799999
-6.69799995 -3.70199990 -0.52300000
-6.69793272 -3.80310082 0.04900590
-6.69780350 -3.84059858 0.09216060
-6.69768763 -3.67482901 -0.40998089
-6.69752407 -3.77629590 0.01400110
-6.69700909 -3.69000506 -0.48600060
-6.69700003 -3.87700009 0.12600000
-6.69700003 -3.68499994 -0.18500000
-6.69700003 -3.68199992 -0.19900000
-6.69700003 -3.66899991 -0.29200000
-6.69700003 -3.66899991 -0.35699999
-6.69700003 -3.71199989 -0.55000001
-6.69699001 -3.69299483 -0.49599931
-6.69653273 -3.66874409 -0.35397530
-6.69648123 -3.79527259 0.04000290
-6.69639444 -3.70921850 -0.54303199
-6.69635439 -3.69564390 -0.14898559
-6.69633532 -3.71518564 -0.09600480
-6.69627571 -3.74170351 -0.04067780
-6.69600010 -3.83899999 0.09100000
-6.69600010 -3.75099993 -0.02600000
-6.69600010 -3.67300010 -0.24699999
-6.69600010 -3.66799998 -0.29600000
-6.69600010 -3.66799998 -0.29899999
-6.69600010 -3.67000008 -0.38499999
-6.69600010 -3.67100000 -0.38999999
-6.69600010 -3.67400002 -0.40700001
-6.69597578 -3.70598674 -0.11599960
-6.69578695 -3.69298530 -0.15904240
-6.69576979 -3.70387244 -0.12399570
-6.69574785 -3.68741202 -0.17801990
-6.69566154 -3.77850199 0.01700680
-6.69561672 -3.78078341 0.02099880
-6.69558668 -3.68977213 -0.16598970
-6.69551706 -3.76129055 -0.00700050
-6.69542933 -3.68855453 -0.17010790
-6.69539738 -3.66821742 -0.34902069
-6.69533777 -3.77219033 0.01000050
-6.69508171 -3.79225039 0.03702680
-6.69501352 -3.66800737 -0.34400070
-6.69500017 -3.84200001 0.09400000
-6.69500017 -3.75600004 -0.01600000
-6.69500017 -3.66799998 -0.33700001
-6.69500017 -3.70600009 -0.53500003
-6.69500017 -3.71399999 -0.55599999
-6.69498110 -3.68547320 -0.47020680
-6.69488716 -3.80272222 0.04937140
-6.69488668 -3.73593688 -0.05099910
-6.69474077 -3.70841026 -0.10901210
-6.69442701 -3.69253302 -0.15694980
-6.69423199 -3.73357153 -0.05599360
-6.69419861 -3.73066807 -0.06301130
-6.69414520 -3.66707945 -0.33200720
-6.69403124 -3.77635217 0.01497880
-6.69400978 -3.68900561 -0.48300079
-6.69399977 -3.82999969 0.08200000
-6.69399977 -3.72199988 -0.07900000
-6.69399977 -3.71099997 -0.10500000
-6.69399977 -3.67800021 -0.21600001
-6.69399977 -3.66700006 -0.31099999
-6.69399977 -3.67499995 -0.42199999
-6.69392443 -3.69041538 -0.48913389
-6.69386005 -3.69192290 -0.49298969
-6.69371223 -3.73883915 -0.04599800
-6.69352245 -3.73094988 -0.06017820
-6.69351053 -3.68923450 -0.48653999
-6.69346189 -3.69125485 -0.16101110
-6.69345331 -3.68624949 -0.18001220
-6.69339323 -3.87386537 0.12421360
-6.69332695 -3.67948365 -0.20880190
-6.69331312 -3.68317223 -0.19200900
-6.69311762 -3.69406509 -0.15200271
-6.69308519 -3.76304770 -0.00400010
-6.69299984 -3.78999996 0.03500000
-6.69299984 -3.71300006 -0.09800000
-6.69299984 -3.70199990 -0.12600000
-6.69299984 -3.66599989 -0.32499999
-6.69299984 -3.68000007 -0.45100001
-6.69298649 -3.68128538 -0.19871390
-6.69297791 -3.71448040 -0.09471410
-6.69294071 -3.71142554 -0.55059320
-6.69241190 -3.70522809 -0.11900730
-6.69223070 -3.87195134 0.12264300
-6.69211435 -3.77756572 0.01738700
-6.69199991 -3.75099993 -0.02300000
-6.69199991 -3.68000007 -0.20600000
-6.69199991 -3.67700005 -0.21799999
-6.69199991 -3.67400002 -0.41900000
-6.69199991 -3.68199992 -0.46100000
-6.69199991 -3.70199990 -0.52499998
-6.69199991 -3.70700002 -0.54000002
-6.69178057 -3.77344012 0.01200140
-6.69168472 -3.70682573 -0.11199470
-6.69146776 -3.68725801 -0.48103359
-6.69140148 -3.68711901 -0.17095920
-6.69108057 -3.68204451 -0.19400240
-6.69101906 -3.69001055 -0.49000150
-6.69100046 -3.71200013 -0.55299997
-6.69099998 -3.75299978 -0.01800000
-6.69099998 -3.74799991 -0.02800000
-6.69099998 -3.71499991 -0.09300000
-6.69099998 -3.66799998 -0.37300000
-6.69099998 -3.67100000 -0.39700001
-6.69099998 -3.68499994 -0.47099999
-6.69096231 -3.68497896 -0.18299900
-6.69084787 -3.67891598 -0.44798979
-6.69080067 -3.73188877 -0.05799830
-6.69076729 -3.69042325 -0.16301870
-6.69072819 -3.77612686 0.01562380
-6.69067335 -3.71349192 -0.09595900
-6.69066191 -3.70881248 -0.10699460
-6.69048071 -3.75827003 -0.00900060
-6.69030333 -3.73416924 -0.05300240
-6.69015503 -3.76983547 0.00820880
-6.69013309 -3.69207311 -0.15400299
-6.69000292 -3.66800141 -0.28200009
-6.69000006 -3.86999989 0.12100000
-6.69000006 -3.71999979 -0.08200000
-6.69000006 -3.67000008 -0.25799999
-6.69000006 -3.68099999 -0.45800000
-6.68995047 -3.69104552 -0.15796790
-6.68993998 -3.79196596 0.03799970
-6.68992472 -3.70295835 -0.12099860
-6.68982363 -3.67890239 -0.20799451
-6.68964100 -3.77779770 0.01899900
-6.68950272 -3.68558407 -0.17766660
-6.68940496 -3.72722578 -0.06500390
-6.68938255 -3.67707682 -0.21553840
-6.68918991 -3.68806505 -0.48479140
-6.68914795 -3.68597937 -0.17295210
-6.68901205 -3.68600702 -0.47800091
-6.68901014 -3.68100572 -0.19600029
-6.68900013 -3.70499992 -0.11400000
-6.68900013 -3.67000008 -0.26100001
-6.68900013 -3.66700006 -0.36800000
-6.68900013 -3.68400002 -0.46799999
-6.68900013 -3.70000005 -0.52200001
-6.68875027 -3.68841362 -0.16601861
-6.68861961 -3.68379068 -0.18498950
-6.68854570 -3.66629863 -0.28602329
-6.68849945 -3.66972542 -0.39297059
-6.68849945 -3.67827463 -0.44603330
-6.68826008 -3.68814325 -0.48801899
-6.68813276 -3.66607261 -0.28900579
-6.68800020 -3.87100005 0.12300000
-6.68800020 -3.67700005 -0.21100000
-6.68800020 -3.67199993 -0.23899999
-6.68800020 -3.66599989 -0.29400000
-6.68800020 -3.66599989 -0.35800001
-6.68800020 -3.66599989 -0.36100000
-6.68800020 -3.70700002 -0.54500002
-6.68791580 -3.75995255 -0.00699990
-6.68775845 -3.72886515 -0.05999780
-6.68769264 -3.75716424 -0.00993480
-6.68766546 -3.71281433 -0.09499520
-6.68727922 -3.69015455 -0.15600650
-6.68717480 -3.68209600 -0.18700489
-6.68714333 -3.70139337 -0.12452190
-6.68700457 -3.70700288 -0.10900010
-6.68699980 -3.75399995 -0.01600000
-6.68699980 -3.68000007 -0.19900000
-6.68699980 -3.67100000 -0.24200000
-6.68699980 -3.66599989 -0.29800001
-6.68699980 -3.66599989 -0.30100000
-6.68699980 -3.66899991 -0.38999999
-6.68699980 -3.71000004 -0.55000001
-6.68692636 -3.67695975 -0.44299510
-6.68682432 -3.68480134 -0.17494310
-6.68650198 -3.68472576 -0.47596461
-6.68618917 -3.68643880 -0.48209980
-6.68618059 -3.68765140 -0.16802970
-6.68610859 -3.77006125 0.01000020
-6.68599987 -3.83699989 0.09100000
-6.68599987 -3.82500005 0.07900000
-6.68599987 -3.71700001 -0.08400000
-6.68599987 -3.70900011 -0.10300000
-6.68599987 -3.69799995 -0.13100000
-6.68599987 -3.66799998 -0.38499999
-6.68551970 -3.75573039 -0.01199910
-6.68539906 -3.68722010 -0.48502901
-6.68523884 -3.67613149 -0.44101581
-6.68499994 -3.82800007 0.08200000
-6.68499994 -3.67300010 -0.22800000
-6.68499994 -3.66499996 -0.31000000
-6.68499994 -3.66499996 -0.31299999
-6.68499994 -3.67300010 -0.42199999
-6.68495464 -3.68097520 -0.18999870
-6.68477154 -3.70604420 -0.54422450
-6.68469906 -3.68742418 -0.16427630
-6.68466282 -3.76581025 0.00499970
-6.68465233 -3.72480631 -0.06699650
-6.68433475 -3.68918490 -0.15900791
-6.68428946 -3.68405747 -0.17795449
[truncated: 16,390,560 more chars]
