# Supplementary material for: Fast Cylindrical Fitting Method Using Point Cloud’s Normals Estimation
Source: Hindawi journal article supplement (doi:10.1155/2018/8904653), 2018-12-12
Supplement: f1 [file 8904653.f1.zip › Point data/Point cloud2.txt]

0	-12.241493225098	-12.783629417419	2.513645887375
1	-12.231378555298	-12.829256057739	2.500340938568
2	-12.229417800903	-12.901144981384	2.505815029144
3	-12.230321884155	-12.969387054443	2.544702529907
4	-12.244207382202	-13.005080223083	2.595201969147
5	-12.254846572876	-13.015453338623	2.681613206863
6	-12.282516479492	-12.959920883179	2.774005889893
7	-12.251661300659	-12.735834121704	2.548708438873
8	-12.283285140991	-12.721760749817	2.731776237488
