# Supplementary material for: Fast Cylindrical Fitting Method Using Point Cloud’s Normals Estimation
Source: Hindawi journal article supplement (doi:10.1155/2018/8904653), 2018-12-12
Supplement: f1 [file 8904653.f1.zip › Point data/Point cloud3.txt]

-6.56949186 -12.59710312 4.38462687 0 0 60
-6.55194616 -12.55419159 4.38383913 0 0 60
-6.55816984 -12.55748558 4.38318491 0 0 60
-6.55532408 -12.56140995 4.38505507 0 0 61
-6.56069613 -12.56423187 4.38463306 0 0 60
-6.56795740 -12.56712627 4.38264990 0 0 59
-6.56856775 -12.57070351 4.38355780 0 0 60
-6.57667875 -12.57407188 4.38134384 0 0 60
-6.57787371 -12.57812977 4.38105631 0 0 60
-6.57417631 -12.58158493 4.38315725 0 0 60
-6.57106256 -12.58552074 4.38406277 0 0 59
-6.57055807 -12.58863544 4.38423777 0 0 60
-6.56699419 -12.59345627 4.38528013 0 0 60
-6.61613798 -12.59353447 4.37164879 0 0 58
-6.61251974 -12.60058594 4.37272978 0 0 59
-6.59530973 -12.60592461 4.37652397 0 0 59
-6.58743715 -12.61061668 4.37875795 0 0 60
-6.57629156 -12.61478233 4.38085508 0 0 61
-6.54995108 -12.53899765 4.38007545 0 0 60
-6.55356932 -12.54310894 4.38015461 0 0 60
-6.57984304 -12.54830837 4.37499952 0 0 57
-6.58692026 -12.55207253 4.37411499 0 0 57
-6.59228945 -12.55489445 4.37369394 0 0 57
-6.58917856 -12.55883121 4.37460136 0 0 57
-6.59670305 -12.56171513 4.37358141 0 0 57
-6.60292864 -12.56500626 4.37293148 0 0 57
-6.60457468 -12.56818581 4.37250805 0 0 57
-6.61295176 -12.57154083 4.37125826 0 0 58
-6.61675406 -12.57478333 4.37023878 0 0 58
-6.61475897 -12.57918072 4.37187529 0 0 58
-6.61510324 -12.58276939 4.37182045 0 0 57
-6.61459875 -12.58588791 4.37199450 0 0 58
-6.61148596 -12.58982182 4.37289953 0 0 58
-6.66044283 -12.59077644 4.36037016 0 0 57
-6.61544752 -12.59752369 4.37292242 0 0 58
-6.65812731 -12.59741688 4.36108255 0 0 58
-6.64679766 -12.60245800 4.36427975 0 0 58
-6.63996172 -12.60675049 4.36518621 0 0 59
-6.63038588 -12.61049747 4.36788130 0 0 59
-6.62269926 -12.61432266 4.36901808 0 0 60
-6.61109972 -12.61937332 4.37125111 0 0 59
-6.59128523 -12.62552452 4.37577534 0 0 60
-6.58752966 -12.53606033 4.36962080 0 0 57
-6.58899164 -12.54011154 4.37029696 0 0 57
-6.57043028 -12.54535103 4.37757635 0 0 57
-6.61827230 -12.54584026 4.36431503 0 0 56
-6.62449598 -12.54913712 4.36366272 0 0 56
-6.62941694 -12.55283833 4.36337566 0 0 55
-6.62545156 -12.55630302 4.36451197 0 0 56
-6.63513231 -12.55924797 4.36289883 0 0 56
-6.64050341 -12.56207085 4.36247730 0 0 56
-6.64300394 -12.56572151 4.36182165 0 0 56
-6.65353441 -12.56914043 4.35997725 0 0 56
-6.65603495 -12.57279015 4.35932350 0 0 57
-6.65534258 -12.57677841 4.36059618 0 0 57
-6.65483618 -12.57989693 4.36076975 0 0 56
-6.65518045 -12.58348083 4.36071205 0 0 56
-6.65363932 -12.58699799 4.36221743 0 0 57
-6.70233011 -12.58796215 4.34872198 0 0 57
-6.65994024 -12.59389114 4.36054564 0 0 57
-6.70216799 -12.59466743 4.34883881 0 0 57
-6.69214201 -12.59929657 4.35167217 0 0 58
-6.68817759 -12.60276127 4.35280609 0 0 58
-6.67815161 -12.60739136 4.35564041 0 0 58
-6.67261553 -12.61127472 4.35617971 0 0 59
-6.66604757 -12.61555958 4.35804701 0 0 59
-6.65360022 -12.62013435 4.36051035 0 0 59
-6.64200354 -12.62518692 4.36274481 0 0 59
-6.62713194 -12.62971306 4.36484385 0 0 59
-6.59627771 -12.63556767 4.37138557 0 0 60
-6.63153791 -12.63926983 4.36164713 0 0 59
-6.54819536 -12.52069664 4.37517500 0 0 66
-6.55356836 -12.52352142 4.37475491 0 0 64
-6.56737280 -12.52746201 4.37304258 0 0 62
-6.57893896 -12.53047848 4.36986876 0 0 60
-6.57654619 -12.53352261 4.37160301 0 0 58
-6.62093210 -12.53436184 4.35930014 0 0 57
-6.62239313 -12.53841209 4.35997629 0 0 56
-6.60689116 -12.54195213 4.36639166 0 0 56
-6.65239286 -12.54325294 4.35482550 0 0 56
-6.65835047 -12.54655838 4.35320616 0 0 56
-6.66542482 -12.55032158 4.35232449 0 0 55
-6.66388083 -12.55383587 4.35382700 0 0 55
-6.67270994 -12.55631256 4.35244322 0 0 55
-6.67893171 -12.55960369 4.35178995 0 0 56
-6.68188429 -12.56237221 4.35100126 0 0 56
-6.69326735 -12.56626511 4.34892607 0 0 57
-6.69491243 -12.56944466 4.34850407 0 0 57
-6.69722700 -12.57396317 4.34894753 0 0 57
-6.69802523 -12.57667160 4.34875679 0 0 57
-6.69863653 -12.58025169 4.34966373 0 0 56
-6.69552469 -12.58418846 4.35056973 0 0 56
-6.74036264 -12.58414268 4.33813572 0 0 57
-6.70097589 -12.59060669 4.34912825 0 0 57
-6.74217081 -12.59178162 4.33875418 0 0 57
-6.73403025 -12.59648323 4.34002352 0 0 58
-6.73378897 -12.59959221 4.34116220 0 0 58
-6.72695208 -12.60388279 4.34206629 0 0 58
-6.72083521 -12.60728455 4.34379816 0 0 58
-6.71484804 -12.61205292 4.34447241 0 0 58
-6.70221186 -12.61749840 4.34803724 0 0 59
-6.69367266 -12.62084961 4.34940290 0 0 60
-6.68683863 -12.62514305 4.35030842 0 0 60
-6.66792727 -12.62953568 4.35456419 0 0 59
-6.63446569 -12.63620567 4.36183977 0 0 59
-6.70404100 -12.63371181 4.34459305 0 0 59
-6.65355539 -12.64484692 4.35456514 0 0 58
-6.54151583 -12.50985909 4.37171984 0 0 62
-6.55577230 -12.51291847 4.36987638 0 0 64
-6.56585550 -12.51721954 4.36816406 0 0 64
-6.57513380 -12.51881027 4.36664534 0 0 64
-6.58481646 -12.52175713 4.36503029 0 0 63
-6.59992170 -12.52529049 4.36295557 0 0 61
-6.61175585 -12.52829933 4.36074352 0 0 61
-6.61039972 -12.53094292 4.36114645 0 0 58
-6.64813757 -12.53246593 4.35173655 0 0 57
-6.65148783 -12.53658867 4.35085297 0 0 56
-6.63840342 -12.54018211 4.35763407 0 0 56
-6.68148756 -12.54142952 4.34569788 0 0 56
-6.68959665 -12.54479599 4.34348726 0 0 56
-6.69608545 -12.54807663 4.34379673 0 0 56
-6.69773436 -12.55125809 4.34337282 0 0 56
-6.70552778 -12.55413246 4.34331942 0 0 56
-6.71148443 -12.55743408 4.34170198 0 0 56
-6.71470308 -12.56019592 4.34187746 0 0 57
-6.72738981 -12.56367302 4.33943415 0 0 58
-6.73118925 -12.56691551 4.33841515 0 0 58
-6.73134851 -12.57137203 4.33945608 0 0 58
-6.73645449 -12.57420540 4.33807278 0 0 58
-6.73966932 -12.57696533 4.33824587 0 0 57
-6.73656130 -12.58090210 4.33915377 0 0 57
-6.77833700 -12.58255959 4.32758284 0 0 57
-6.73940134 -12.58813858 4.33844233 0 0 57
-6.78190088 -12.58890533 4.32770300 0 0 57
-6.77160501 -12.59354687 4.32956934 0 0 58
-6.77136660 -12.59665298 4.33070755 0 0 58
-6.77040720 -12.60065079 4.33101892 0 0 58
-6.76729536 -12.60458374 4.33192253 0 0 58
-6.76418257 -12.60852432 4.33282900 0 0 58
-6.75043249 -12.61350918 4.33565950 0 0 58
-6.73798513 -12.61808968 4.33812284 0 0 59
-6.73460150 -12.62203407 4.33806467 0 0 59
-6.72287512 -12.62572098 4.34135866 0 0 60
-6.70278978 -12.63188648 4.34491968 0 0 59
-6.76244307 -12.62955284 4.33042383 0 0 59
-6.67358541 -12.64091873 4.35104227 0 0 58
-6.73121691 -12.63988590 4.33608532 0 0 59
-6.67001677 -12.64847374 4.34900045 0 0 58
-6.61304140 -12.65632629 4.35865927 0 0 58
-6.55244589 -12.50620461 4.36553717 0 0 60
-6.57146215 -12.50850868 4.36236286 0 0 59
-6.58199167 -12.51192570 4.36051893 0 0 62
-6.59279203 -12.51533413 4.35963535 0 0 63
-6.60207224 -12.51692581 4.35811472 0 0 64
-6.61287165 -12.52033615 4.35723448 0 0 64
-6.62686110 -12.52340317 4.35442591 0 0 63
-6.63784361 -12.52594185 4.35244417 0 0 62
-6.63949156 -12.52911758 4.35202026 0 0 59
-6.67610884 -12.53018188 4.34187746 0 0 58
-6.68188238 -12.53435707 4.34135628 0 0 56
-6.66749620 -12.53835583 4.34850693 0 0 56
-6.70972967 -12.53913307 4.33680296 0 0 57
-6.71895647 -12.54296112 4.33532381 0 0 58
-6.72648096 -12.54584694 4.33430481 0 0 57
-6.72709417 -12.54942131 4.33521032 0 0 57
-6.73547125 -12.55277920 4.33396196 0 0 57
-6.74273157 -12.55567360 4.33197927 0 0 57
-6.74464655 -12.55884075 4.33252192 0 0 58
-6.75517607 -12.56226063 4.33067369 0 0 60
-6.76158571 -12.56468201 4.32892323 0 0 60
-6.76174498 -12.56914234 4.32996511 0 0 59
-6.76554728 -12.57238293 4.32894468 0 0 60
-6.77091742 -12.57520390 4.32852888 0 0 59
-6.77283239 -12.57837105 4.32906389 0 0 58
-6.81506395 -12.57914925 4.31736135 0 0 58
-6.77697897 -12.58520317 4.32798958 0 0 57
-6.81705809 -12.58591652 4.31688166 0 0 58
-6.81003428 -12.59108162 4.31888628 0 0 58
-6.80979586 -12.59418678 4.32002211 0 0 58
-6.80883551 -12.59818459 4.32033253 0 0 59
-6.80963278 -12.60089302 4.32014322 0 0 59
-6.80997801 -12.60448265 4.32008314 0 0 59
-6.80080080 -12.60958481 4.32268476 0 0 58
-6.78965616 -12.61375141 4.32478142 0 0 58
-6.78497362 -12.61810875 4.32509089 0 0 58
-6.77109003 -12.62173080 4.32898188 0 0 59
-6.75688696 -12.62760162 4.33194590 0 0 59
-6.81542063 -12.62480545 4.31671858 0 0 59
-6.74235868 -12.63571548 4.33398438 0 0 59
-6.79352903 -12.63449574 4.32081985 0 0 59
-6.74988317 -12.64133835 4.32988501 0 0 58
-6.72634459 -12.64785099 4.33440971 0 0 57
-6.69594145 -12.65282249 4.34081745 0 0 57
-6.63160181 -12.66224861 4.35253859 0 0 57
-6.54310656 -12.49841881 4.36285305 0 0 58
-6.56342745 -12.50031376 4.35931444 0 0 58
-6.58310556 -12.50395966 4.35700750 0 0 59
-6.60100508 -12.50580406 4.35310411 0 0 59
-6.60677671 -12.50997734 4.35258484 0 0 61
-6.61412096 -12.51373482 4.35266590 0 0 63
-6.62424994 -12.51579857 4.35091591 0 0 63
-6.63393164 -12.51874256 4.34930182 0 0 65
-6.64877081 -12.52228642 4.34626007 0 0 64
-6.66217661 -12.52487564 4.34464598 0 0 64
-6.66512728 -12.52764511 4.34385729 0 0 61
-6.69959116 -12.52864075 4.33430910 0 0 60
-6.71124029 -12.53252125 4.33319759 0 0 57
-6.69659090 -12.53653336 4.33938169 0 0 56
-6.73621225 -12.53812790 4.32840729 0 0 58
-6.74432611 -12.54149532 4.32619524 0 0 59
-6.75472307 -12.54355049 4.32540941 0 0 59
-6.75748968 -12.54719067 4.32571793 0 0 58
-6.76586866 -12.55054665 4.32447052 0 0 58
-6.77254152 -12.55295753 4.32368279 0 0 58
-6.77374029 -12.55701828 4.32339191 0 0 58
-6.77996111 -12.56031227 4.32274055 0 0 59
-6.78636885 -12.56273556 4.32099009 0 0 61
-6.78868628 -12.56725788 4.32143497 0 0 60
-6.79163599 -12.57002640 4.32064724 0 0 60
-6.79700804 -12.57284737 4.32022619 0 0 60
-6.80408239 -12.57661152 4.31934214 0 0 59
-6.84415674 -12.57732773 4.30823469 0 0 59
-6.81410360 -12.58314705 4.31766939 0 0 57
-6.84987402 -12.58373451 4.30775738 0 0 57
-6.84631014 -12.58855534 4.30879784 0 0 58
-6.84737444 -12.59125042 4.30956984 0 0 58
-6.84425974 -12.59518623 4.31047487 0 0 58
-6.84460497 -12.59877396 4.31042099 0 0 59
-6.84710360 -12.60242462 4.30976725 0 0 59
-6.84398985 -12.60635948 4.31067228 0 0 59
-6.83526564 -12.61058044 4.31313753 0 0 58
-6.83319235 -12.61411762 4.31271267 0 0 58
-6.82015848 -12.61821270 4.31637144 0 0 58
-6.80941153 -12.62373638 4.31837606 0 0 59
-6.85972738 -12.62204361 4.30543900 0 0 59
-6.79991293 -12.63108444 4.32005024 0 0 59
-6.84632063 -12.63062096 4.30821276 0 0 59
-6.81286287 -12.63729382 4.31548977 0 0 59
-6.79884291 -12.64229393 4.31735468 0 0 59
-6.78338957 -12.64633369 4.32064772 0 0 58
-6.75684309 -12.65231228 4.32599878 0 0 57
-6.69511175 -12.66092300 4.33698559 0 0 56
-6.55560350 -12.49434280 4.35726690 0 0 56
-6.57350206 -12.49618721 4.35336161 0 0 56
-6.59206533 -12.49937248 4.35032225 0 0 57
-6.60847807 -12.50249577 4.34788275 0 0 59
-6.62291861 -12.50468826 4.34493637 0 0 60
-6.62940645 -12.50796700 4.34524870 0 0 60
-6.63648081 -12.51173210 4.34436655 0 0 61
-6.64616251 -12.51468086 4.34275103 0 0 62
-6.65499067 -12.51715183 4.34136724 0 0 64
-6.67225504 -12.52074814 4.33869314 0 0 64
-6.68408823 -12.52375603 4.33648157 0 0 64
-6.68860960 -12.52610588 4.33629084 0 0 62
-6.72150469 -12.52752495 4.32614660 0 0 59
-6.73530722 -12.53146553 4.32443523 0 0 59
-6.72568369 -12.53470993 4.33025408 0 0 58
-6.76445532 -12.53583527 4.31951380 0 0 59
-6.76825762 -12.53907585 4.31849241 0 0 60
-6.77820444 -12.54201126 4.31784058 0 0 60
-6.78442812 -12.54530334 4.31718969 0 0 60
-6.79411077 -12.54825211 4.31557369 0 0 60
-6.79902983 -12.55195236 4.31528568 0 0 59
-6.80328321 -12.55431461 4.31413507 0 0 58
-6.80820227 -12.55801773 4.31384420 0 0 58
-6.81200647 -12.56125736 4.31282663 0 0 59
-6.81692648 -12.56496239 4.31254053 0 0 59
-6.82099390 -12.56819344 4.31248713 0 0 59
-6.82479715 -12.57143402 4.31146860 0 0 59
-6.83317232 -12.57478714 4.31021357 0 0 59
-6.87109423 -12.57544136 4.29970646 0 0 58
-6.84737635 -12.58008385 4.30841064 0 0 58
-6.88242292 -12.58156586 4.29766703 0 0 57
-6.87827444 -12.58589935 4.29990435 0 0 58
-6.88122606 -12.58866882 4.29911423 0 0 58
-6.87941599 -12.59219551 4.29965448 0 0 58
-6.87787485 -12.59571457 4.30116129 0 0 58
-6.87906981 -12.59977150 4.30087090 0 0 59
-6.87680864 -12.60418224 4.30154753 0 0 58
-6.87154150 -12.60805130 4.30304813 0 0 58
-6.87162066 -12.61165333 4.30203009 0 0 58
-6.86289358 -12.61587143 4.30449486 0 0 58
-6.85332060 -12.61962128 4.30718994 0 0 58
-6.90076303 -12.61876011 4.29402208 0 0 57
-6.84812784 -12.62709332 4.30767202 0 0 60
-6.88866091 -12.62692642 4.29643202 0 0 59
-6.86368513 -12.63248253 4.30237770 0 0 59
-6.85509062 -12.63806725 4.30378580 0 0 59
-6.84597158 -12.64093304 4.30634642 0 0 59
-6.82804155 -12.64716339 4.30931044 0 0 59
-6.80122900 -12.65315056 4.31369734 0 0 58
-6.76952505 -12.65853214 4.32047415 0 0 56
-6.56568098 -12.49021721 4.35131598 0 0 55
-6.58554888 -12.49299240 4.34791088 0 0 55
-6.59913778 -12.49470997 4.34519911 0 0 56
-6.61554766 -12.49783325 4.34275579 0 0 58
-6.62850046 -12.50130272 4.34127760 0 0 60
-6.64294100 -12.50349426 4.33833456 0 0 61
-6.65262175 -12.50644112 4.33671808 0 0 60
-6.66166353 -12.51113796 4.33633757 0 0 60
-6.67094755 -12.51273155 4.33481932 0 0 60
-6.67847395 -12.51561260 4.33380079 0 0 62
-6.69573259 -12.51920891 4.33112669 0 0 63
-6.70730066 -12.52222633 4.32795191 0 0 63
-6.71051836 -12.52498817 4.32812691 0 0 62
-6.74974585 -12.52523041 4.31725121 0 0 59
-6.75663614 -12.52986526 4.31746340 0 0 59
-6.75262213 -12.53282642 4.32172441 0 0 59
-6.78897238 -12.53389740 4.31061792 0 0 62
-6.79389429 -12.53760147 4.31032991 0 0 60
-6.80096769 -12.54136562 4.30944538 0 0 60
-6.80503511 -12.54459572 4.30939150 0 0 61
-6.81628656 -12.54712200 4.30837297 0 0 61
-6.82269526 -12.54954529 4.30662012 0 0 60
-6.82891893 -12.55283546 4.30596924 0 0 58
-6.83859873 -12.55578423 4.30435419 0 0 57
-6.84240103 -12.55902576 4.30333614 0 0 57
-6.84758806 -12.56271744 4.30401230 0 0 57
-6.85139036 -12.56595898 4.30299234 0 0 57
-6.85676241 -12.56877899 4.30257177 0 0 58
-6.86298704 -12.57207298 4.30191755 0 0 58
-6.90149164 -12.57320690 4.29021406 0 0 57
-6.87646818 -12.57826233 4.29928493 0 0 58
-6.91524363 -12.57938385 4.28854322 0 0 56
-6.91082525 -12.58373260 4.28981495 0 0 57
-6.91404390 -12.58649063 4.28999138 0 0 57
-6.91438913 -12.59007835 4.28993464 0 0 57
-6.91257715 -12.59360313 4.29047537 0 0 57
-6.91377592 -12.59766579 4.29018593 0 0 57
-6.91093111 -12.60159111 4.29205561 0 0 57
-6.90781641 -12.60552502 4.29296160 0 0 57
-6.90919733 -12.60871315 4.29157591 0 0 56
-6.90177584 -12.61252594 4.29367399 0 0 56
-6.89390039 -12.61721992 4.29590702 0 0 57
-6.94421816 -12.61552620 4.28297138 0 0 56
-6.88786554 -12.62421894 4.29662180 0 0 59
-6.93296766 -12.62416363 4.28514957 0 0 57
-6.90799189 -12.62972260 4.29110050 0 0 58
-6.90200758 -12.63448906 4.29177380 0 0 59
-6.89719248 -12.63747978 4.29314041 0 0 59
-6.88402224 -12.64294815 4.29477644 0 0 58
-6.86726522 -12.64740181 4.29843426 0 0 58
-6.84979010 -12.65275002 4.30126190 0 0 58
-6.79335165 -12.66058159 4.31284857 0 0 56
-6.74140501 -12.66766548 4.32214594 0 0 53
-6.55458784 -12.48372459 4.34913015 0 0 57
-6.54796839 -12.48750305 4.35412169 0 0 57
-6.59131670 -12.48874378 4.34315062 0 0 56
-6.60902929 -12.49145508 4.34034586 0 0 56
-6.61916304 -12.49351883 4.33859444 0 0 56
-6.63315058 -12.49658966 4.33578539 0 0 58
-6.64825583 -12.50012302 4.33371019 0 0 60
-6.66269732 -12.50231171 4.33076620 0 0 60
-6.67349577 -12.50571918 4.32988405 0 0 60
-6.68533182 -12.50872898 4.32767248 0 0 59
-6.69658136 -12.51125526 4.32665491 0 0 59
-6.70325804 -12.51366520 4.32586670 0 0 61
-6.71894979 -12.51767921 4.32259893 0 0 61
-6.72993326 -12.52021790 4.32061529 0 0 62
-6.73530531 -12.52303886 4.32019472 0 0 61
-6.77650023 -12.52421570 4.30981970 0 0 60
-6.77984858 -12.52833748 4.30893755 0 0 60
-6.77498579 -12.53082371 4.31342554 0 0 61
-6.80899668 -12.53270626 4.30401278 0 0 63
-6.81953001 -12.53612518 4.30216646 0 0 60
-6.82705355 -12.53900814 4.30114746 0 0 59
-6.82851839 -12.54306030 4.30182362 0 0 60
-6.83649874 -12.54506111 4.30066967 0 0 60
-6.84702730 -12.54847527 4.29882431 0 0 59
-6.85455465 -12.55136299 4.29780674 0 0 57
-6.86638975 -12.55437088 4.29559326 0 0 56
-6.87176085 -12.55719090 4.29517221 0 0 56
-6.87753057 -12.56136608 4.29465628 0 0 56
-6.88178682 -12.56372643 4.29350138 0 0 56
-6.88715887 -12.56654739 4.29307938 0 0 57
-6.89207792 -12.57025146 4.29279423 0 0 57
-6.93561220 -12.57061577 4.28072166 0 0 56
-6.90686369 -12.57602882 4.28979349 0 0 57
-6.94694090 -12.57674217 4.27868509 0 0 56
-6.94494772 -12.58113670 4.28032351 0 0 56
-6.94816542 -12.58390045 4.28049994 0 0 57
-6.94981050 -12.58707714 4.28007555 0 0 56
-6.95015574 -12.59066582 4.28001881 0 0 56
-6.95292234 -12.59430695 4.28032923 0 0 56
-6.95066118 -12.59871578 4.28100443 0 0 56
-6.94754934 -12.60265255 4.28191137 0 0 55
-6.95049810 -12.60541916 4.28112173 0 0 55
-6.94653654 -12.60888386 4.28225994 0 0 55
-6.93709326 -12.61399651 4.28389454 0 0 56
-6.98982954 -12.61235428 4.27132750 0 0 56
-6.93046904 -12.62051582 4.28580284 0 0 57
-6.98118067 -12.62017345 4.27277136 0 0 56
-6.95333719 -12.62656212 4.27848911 0 0 57
-6.94761515 -12.63131714 4.28012753 0 0 58
-6.94410563 -12.63389969 4.28112841 0 0 58
-6.93726587 -12.63819504 4.28203249 0 0 57
-6.92279673 -12.64407349 4.28403807 0 0 57
-6.90864611 -12.64770699 4.28696012 0 0 57
-6.87087965 -12.65425491 4.29543066 0 0 57
-6.85685968 -12.65925217 4.29729652 0 0 56
-6.76262522 -12.67053413 4.31525278 0 0 52
-6.53772402 -12.48148441 4.35170984 0 0 60
-6.57806730 -12.48218536 4.34156513 0 0 56
-6.57360220 -12.48602676 4.34595823 0 0 56
-6.61107111 -12.48756123 4.33558416 0 0 57
-6.62793589 -12.48980331 4.33300591 0 0 57
-6.64022303 -12.49192810 4.33066130 0 0 56
-6.65290880 -12.49541092 4.32821894 0 0 57
-6.66801405 -12.49894142 4.32614279 0 0 59
-6.68272161 -12.50112152 4.32416296 0 0 59
-6.69370699 -12.50365639 4.32218122 0 0 59
-6.70836020 -12.50806999 4.32024050 0 0 59
-6.71979761 -12.50972748 4.31812525 0 0 59
-6.72516966 -12.51254845 4.31770325 0 0 60
-6.74027681 -12.51608086 4.31562567 0 0 60
-6.75211000 -12.51908875 4.31341553 0 0 60
-6.75878572 -12.52150154 4.31262684 0 0 60
-6.79625750 -12.52303314 4.30224943 0 0 61
-6.80593634 -12.52597904 4.30063772 0 0 60
-6.79585981 -12.53010464 4.30658913 0 0 61
-6.83005762 -12.53111649 4.29607868 0 0 62
-6.84431314 -12.53417587 4.29423285 0 0 61
-6.85399199 -12.53712082 4.29261780 0 0 59
-6.85590982 -12.54028893 4.29315948 0 0 58
-6.86298227 -12.54405594 4.29227543 0 0 58
-6.87396669 -12.54659271 4.29029560 0 0 57
-6.88064241 -12.54900360 4.28950787 0 0 57
-6.89462996 -12.55207634 4.28669739 0 0 56
-6.90085268 -12.55536652 4.28604841 0 0 56
-6.90707731 -12.55866241 4.28539419 0 0 56
-6.91114664 -12.56189156 4.28533697 0 0 56
-6.91755342 -12.56431389 4.28358841 0 0 56
-6.92332697 -12.56849003 4.28307152 0 0 56
-6.96600962 -12.56838512 4.27123165 0 0 56
-6.93968153 -12.57384682 4.28066826 0 0 56
-6.97845602 -12.57497215 4.26992607 0 0 56
-6.97749567 -12.57896996 4.27023458 0 0 56
-6.97986364 -12.58125496 4.27064085 0 0 56
-6.98393297 -12.58448792 4.27058411 0 0 56
-6.98643160 -12.58813953 4.26993275 0 0 56
-6.99135160 -12.59184074 4.26964521 0 0 56
-6.99039125 -12.59584045 4.26995564 0 0 55
-6.98988581 -12.59895706 4.27012873 0 0 55
-6.99323702 -12.60307884 4.26924467 0 0 55
-6.99084234 -12.60612106 4.27098036 0 0 55
-6.98315477 -12.60994339 4.27211475 0 0 55
-7.02956152 -12.60947990 4.26027727 0 0 56
-6.97908163 -12.61787796 4.27333021 0 0 56
-7.02679300 -12.61700249 4.26112413 0 0 56
-7.00182009 -12.62256241 4.26707458 0 0 56
-6.99367857 -12.62726402 4.26834726 0 0 56
-6.99186850 -12.63079071 4.26888418 0 0 56
-6.98848963 -12.63473988 4.26882696 0 0 57
-6.97734404 -12.63890553 4.27092457 0 0 57
-6.96574831 -12.64395714 4.27316046 0 0 57
-6.93058443 -12.64968586 4.28089714 0 0 57
-6.92505121 -12.65356827 4.28143644 0 0 57
-6.88356066 -12.66047382 4.28990507 0 0 56
-6.86869001 -12.66500092 4.29200268 0 0 54
-6.55990267 -12.48035240 4.34451008 0 0 57
-6.59867716 -12.48147774 4.33376646 0 0 56
-6.59466314 -12.48443890 4.33802462 0 0 56
-6.62952471 -12.48679066 4.32838106 0 0 58
-6.64553881 -12.48855972 4.32603502 0 0 57
-6.65997934 -12.49074841 4.32309198 0 0 57
-6.67639017 -12.49387169 4.32065153 0 0 57
-6.68934202 -12.49734116 4.31917238 0 0 58
-6.70463419 -12.50000191 4.31599665 0 0 58
-6.71561766 -12.50254250 4.31401682 0 0 58
-6.73013735 -12.50558949 4.31313515 0 0 58
-6.74112558 -12.50812721 4.31115294 0 0 59
-6.74649572 -12.51094627 4.31073236 0 0 59
-6.76133490 -12.51449013 4.30769205 0 0 58
-6.77447271 -12.51708984 4.30511808 0 0 58
-6.77984381 -12.51991081 4.30469370 0 0 59
-6.81516314 -12.52137947 4.29491568 0 0 60
-6.82811403 -12.52484894 4.29343510 0 0 61
-6.82064390 -12.52815819 4.29865694 0 0 61
-6.85654497 -12.53011131 4.28768396 0 0 61
-6.86779737 -12.53264046 4.28666592 0 0 61
-6.87747431 -12.53558350 4.28504992 0 0 60
-6.88369989 -12.53887653 4.28439856 0 0 58
-6.89252806 -12.54135132 4.28301477 0 0 57
-6.90351152 -12.54388714 4.28103352 0 0 57
-6.90843153 -12.54759216 4.28074598 0 0 56
-6.92399168 -12.55024147 4.27853632 0 0 56
-6.92909861 -12.55307484 4.27715254 0 0 56
-6.93617010 -12.55683708 4.27626657 0 0 56
-6.94154215 -12.55966282 4.27584791 0 0 56
-6.94821596 -12.56207180 4.27505922 0 0 56
-6.95444155 -12.56536579 4.27440500 0 0 56
-6.99536753 -12.56655121 4.26306915 0 0 57
-6.97138071 -12.57120514 4.27081156 0 0 56
-7.00799990 -12.57226562 4.26066542 0 0 56
-7.00815916 -12.57672310 4.26170731 0 0 56
-7.01052713 -12.57901001 4.26211452 0 0 56
-7.01733446 -12.58278656 4.26026630 0 0 57
-7.02185488 -12.58513737 4.26007414 0 0 57
-7.03108454 -12.58896542 4.25859404 0 0 56
-7.03012323 -12.59296417 4.25890303 0 0 56
-7.02988482 -12.59607124 4.26004076 0 0 56
-7.02865839 -12.60007954 4.25938702 0 0 56
-7.02469301 -12.60354424 4.26052618 0 0 56
-7.02315474 -12.60705948 4.26202679 0 0 56
-7.06583643 -12.60695171 4.25018930 0 0 56
-7.02272558 -12.61377525 4.26118231 0 0 56
-7.06782961 -12.61371994 4.24971056 0 0 56
-7.04716444 -12.61940575 4.25446415 0 0 55
-7.04404974 -12.62333775 4.25537014 0 0 55
-7.04139090 -12.62639236 4.25614405 0 0 55
-7.03997946 -12.63127232 4.25658607 0 0 56
-7.03013849 -12.63503075 4.25831795 0 0 56
-7.02114725 -12.63926315 4.25982094 0 0 56
-6.99159670 -12.64470482 4.26599789 0 0 56
-6.98978662 -12.64823151 4.26654100 0 0 56
-6.94914579 -12.65560913 4.27477837 0 0 56
-6.93342257 -12.65966320 4.27710485 0 0 56
-6.91764879 -12.66595078 4.27947283 0 0 54
-6.53450060 -12.47303677 4.34420919 0 0 61
-6.55293322 -12.47485924 4.34223127 0 0 59
-6.58311701 -12.47882748 4.33597708 0 0 56
-6.61928415 -12.48076916 4.32596827 0 0 56
-6.61468840 -12.48324776 4.33142042 0 0 56
-6.64628077 -12.48507500 4.32163954 0 0 58
-6.66314173 -12.48731804 4.31906557 0 0 58
-6.68000364 -12.48955727 4.31648970 0 0 58
-6.69744921 -12.49228096 4.31271601 0 0 58
-6.71210241 -12.49669456 4.31077623 0 0 57
-6.72699594 -12.49800110 4.30769777 0 0 58
-6.73864794 -12.50188255 4.30658579 0 0 58
-6.75159883 -12.50535393 4.30510473 0 0 58
-6.76087999 -12.50694466 4.30358553 0 0 58
-6.76755667 -12.50935745 4.30279875 0 0 58
-6.78324747 -12.51337147 4.29952860 0 0 57
-6.79795504 -12.51555061 4.29754877 0 0 57
-6.80332804 -12.51837349 4.29712629 0 0 58
-6.83734083 -12.52025127 4.28771496 0 0 58
-6.84701967 -12.52320004 4.28609896 0 0 61
-6.84386015 -12.52663040 4.29012728 0 0 61
-6.87917662 -12.52810097 4.28034639 0 0 61
-6.89100790 -12.53110886 4.27813530 0 0 61
-6.90226221 -12.53363514 4.27711916 0 0 60
-6.90848494 -12.53693008 4.27646446 0 0 59
-6.91946650 -12.53946590 4.27448511 0 0 58
-6.92914724 -12.54241180 4.27287054 0 0 57
-6.93537283 -12.54570675 4.27221918 0 0 56
-6.94850779 -12.54830360 4.26964045 0 0 56
-6.95603609 -12.55118752 4.26862240 0 0 56
-6.96468019 -12.55453205 4.26833868 0 0 56
-6.96978331 -12.55736446 4.26694965 0 0 56
-6.97731066 -12.56024933 4.26593351 0 0 56
-6.98483515 -12.56313324 4.26491499 0 0 56
-7.02576685 -12.56431770 4.25357580 0 0 58
-7.00159121 -12.56984520 4.26241636 0 0 57
-7.03951406 -12.57049370 4.25190544 0 0 57
-7.04097795 -12.57454586 4.25258064 0 0 57
-7.04262686 -12.57772446 4.25215769 0 0 56
-7.04930067 -12.58013535 4.25137234 0 0 58
-7.05467463 -12.58296013 4.25094986 0 0 58
-7.06305075 -12.58631325 4.24970198 0 0 58
-7.06424665 -12.59037399 4.24941349 0 0 58
-7.06615877 -12.59354210 4.24995422 0 0 57
-7.06192923 -12.59701729 4.25012684 0 0 56
-7.05751181 -12.60136223 4.25139856 0 0 56
-7.05915880 -12.60454178 4.25097656 0 0 56
-7.10126066 -12.60395050 4.24033308 0 0 56
-7.06142187 -12.61129761 4.25146151 0 0 56
-7.10782671 -12.61083603 4.23962450 0 0 56
-7.08846617 -12.61610699 4.24401236 0 0 55
-7.09226751 -12.61934948 4.24299431 0 0 55
-7.09045839 -12.62287521 4.24353266 0 0 56
-7.08949995 -12.62687302 4.24384212 0 0 56
-7.08180952 -12.63069344 4.24497795 0 0 56
-7.07523966 -12.63497829 4.24684763 0 0 56
-7.04999971 -12.64054680 4.25182962 0 0 56
-7.05380201 -12.64378548 4.25081253 0 0 56
-7.01576567 -12.65034676 4.25831938 0 0 56
-7.00031328 -12.65438652 4.26161051 0 0 56
-6.96456289 -12.66237164 4.26746178 0 0 56
-6.95243406 -12.66470337 4.27085018 0 0 56
-6.54609156 -12.47072601 4.33889246 0 0 58
-6.55295134 -12.47226334 4.33700800 0 0 57
-6.57268763 -12.47367668 4.33466196 0 0 57
-6.60399199 -12.47810745 4.32914448 0 0 56
-6.63975954 -12.47869492 4.31923056 0 0 58
-6.63359308 -12.48159409 4.32408381 0 0 57
-6.66414881 -12.48382187 4.31563330 0 0 58
-6.68289804 -12.48613739 4.31149721 0 0 58
-6.69845533 -12.48878670 4.30928564 0 0 59
-6.71832228 -12.49156189 4.30588198 0 0 60
-6.73258066 -12.49462318 4.30403662 0 0 58
-6.74702120 -12.49681091 4.30109453 0 0 58
-6.75912142 -12.49980927 4.29984522 0 0 58
-6.77180719 -12.50329018 4.29740191 0 0 57
-6.78109026 -12.50488281 4.29588175 0 0 58
-6.78973532 -12.50822735 4.29559851 0 0 57
-6.80587626 -12.51136208 4.29219389 0 0 56
-6.82228804 -12.51448250 4.28975201 0 0 56
-6.82680941 -12.51683426 4.28956032 0 0 57
-6.86127520 -12.51783371 4.28000927 0 0 57
-6.86704588 -12.52200508 4.27949333 0 0 59
-6.86388350 -12.52544117 4.28352261 0 0 61
-6.89893293 -12.52692032 4.27277994 0 0 60
-6.91233778 -12.52950954 4.27116823 0 0 61
-6.92659140 -12.53256989 4.26932001 0 0 60
-6.93196535 -12.53539276 4.26890039 0 0 59
-6.94294977 -12.53792763 4.26691866 0 0 58
-6.95262861 -12.54087353 4.26530313 0 0 57
-6.96015692 -12.54375744 4.26428461 0 0 57
-6.97414351 -12.54682922 4.26147699 0 0 57
-6.98297071 -12.54930115 4.26009130 0 0 56
-6.99031591 -12.55305767 4.26017332 0 0 56
-6.99672270 -12.55547905 4.25842142 0 0 56
-7.00294733 -12.55877304 4.25777006 0 0 57
-7.01504755 -12.56177139 4.25652122 0 0 57
-7.05296946 -12.56242180 4.24601126 0 0 59
-7.02983332 -12.56754971 4.25352144 0 0 58
-7.06775713 -12.56820011 4.24301004 0 0 58
-7.06922007 -12.57224846 4.24368715 0 0 58
-7.07216978 -12.57501888 4.24289846 0 0 56
-7.07408476 -12.57818604 4.24343777 0 0 58
-7.08030748 -12.58148193 4.24278545 0 0 58
-7.08541155 -12.58431244 4.24140167 0 0 59
-7.08903074 -12.58842468 4.24148035 0 0 59
-7.09354925 -12.59077644 4.24128914 0 0 58
-7.09605074 -12.59442520 4.24063778 0 0 56
-7.09424067 -12.59795189 4.24117613 0 0 56
-7.09413195 -12.60242271 4.24125385 0 0 56
-7.13381147 -12.60178375 4.23024416 0 0 56
-7.10030222 -12.60795021 4.24063921 0 0 56
-7.14325285 -12.60783577 4.22976446 0 0 56
-7.12819815 -12.61323357 4.23296309 0 0 56
-7.13069677 -12.61688423 4.23230886 0 0 56
-7.13045549 -12.61998940 4.23344564 0 0 57
-7.12923098 -12.62400055 4.23279285 0 0 57
-7.12526655 -12.62746143 4.23392725 0 0 57
-7.12130308 -12.63092613 4.23506594 0 0 57
-7.10194063 -12.63619995 4.23945284 0 0 57
-7.10574198 -12.63943768 4.23843479 0 0 57
-7.08050108 -12.64500713 4.24342203 0 0 57
-7.06804991 -12.64958572 4.24588537 0 0 57
-7.03275537 -12.65668869 4.25160217 0 0 56
-7.01299429 -12.66061020 4.25608587 0 0 56
-6.99551535 -12.66595268 4.25891542 0 0 57
-7.01825762 -12.66789818 4.25574160 0 0 55
-7.03607321 -12.66887951 4.24977255 0 0 56
-6.56715155 -12.46913433 4.33095980 0 0 56
-6.57342768 -12.47019386 4.33026838 0 0 56
-6.59114408 -12.47290421 4.32746172 0 0 56
-6.62289858 -12.47645378 4.32180738 0 0 57
-6.65605974 -12.47786331 4.31262445 0 0 59
-6.65204763 -12.48082352 4.31688261 0 0 58
-6.68475580 -12.48311234 4.30783653 0 0 58
-6.70292044 -12.48494434 4.30489349 0 0 58
-6.71520948 -12.48707199 4.30254698 0 0 60
-6.73592520 -12.49031734 4.29891157 0 0 62
-6.75103331 -12.49385071 4.29683590 0 0 60
-6.76462317 -12.49556923 4.29412222 0 0 58
-6.77757692 -12.49904060 4.29264212 0 0 58
-6.79183245 -12.50209999 4.29079962 0 0 57
-6.80111551 -12.50369263 4.28928041 0 0 57
-6.81034136 -12.50752258 4.28780031 0 0 56
-6.83021116 -12.51029587 4.28439474 0 0 56
-6.84576750 -12.51294708 4.28218412 0 0 56
-6.85002279 -12.51530457 4.28102922 0 0 56
-6.88188219 -12.51712608 4.27221251 0 0 56
-6.88895559 -12.52088928 4.27133083 0 0 57
-6.88409376 -12.52337551 4.27582216 0 0 59
-6.92025805 -12.52531815 4.26580906 0 0 58
-6.93294382 -12.52879810 4.26336908 0 0 60
-6.94765425 -12.53097820 4.26138735 0 0 61
-6.95517969 -12.53386497 4.26036787 0 0 60
-6.96557760 -12.53591537 4.25958395 0 0 59
-6.97741461 -12.53892422 4.25736952 0 0 58
-6.98578882 -12.54227734 4.25612020 0 0 57
-6.99892950 -12.54487991 4.25354433 0 0 57
-7.00991106 -12.54741669 4.25156355 0 0 57
-7.01640177 -12.55069923 4.25187254 0 0 57
-7.02366304 -12.55359268 4.24989033 0 0 57
-7.02903318 -12.55641365 4.24946928 0 0 57
-7.04198694 -12.55988693 4.24799252 0 0 58
-7.07618380 -12.56089401 4.23747969 0 0 60
-7.05722284 -12.56478310 4.24485826 0 0 58
-7.08993578 -12.56707191 4.23580837 0 0 59
-7.09184790 -12.57024002 4.23635006 0 0 58
-7.09780741 -12.57354164 4.23473454 0 0 56
-7.10102320 -12.57630348 4.23490953 0 0 57
-7.10509348 -12.57953358 4.23485470 0 0 57
-7.10889578 -12.58277512 4.23383570 0 0 58
-7.11381388 -12.58647919 4.23354769 0 0 58
-7.11788416 -12.58970928 4.23349190 0 0 58
-7.12729692 -12.59266472 4.23091316 0 0 56
-7.12836218 -12.59536171 4.23168516 0 0 56
-7.12609911 -12.59976959 4.23236036 0 0 56
-7.16577578 -12.59912968 4.22134829 0 0 56
-7.13527155 -12.60583210 4.23091936 0 0 56
-7.17364740 -12.60560226 4.22027349 0 0 56
-7.16231871 -12.61064053 4.22347116 0 0 56
-7.16265917 -12.61423206 4.22341394 0 0 57
-7.16431189 -12.61741066 4.22299242 0 0 57
-7.16335154 -12.62140560 4.22330141 0 0 57
-7.16154337 -12.62493324 4.22384119 0 0 57
-7.15973043 -12.62845802 4.22438002 0 0 57
-7.14427614 -12.63250351 4.22767305 0 0 58
-7.14592791 -12.63568401 4.22724867 0 0 58
-7.12611055 -12.64183998 4.23177338 0 0 58
-7.12187910 -12.64531040 4.23194742 0 0 58
-7.09833956 -12.65182304 4.23647213 0 0 57
-7.08118486 -12.65492439 4.24022245 0 0 57
-7.05894804 -12.66102409 4.24438334 0 0 57
-7.03025007 -12.66693878 4.25032997 0 0 57
-7.07495451 -12.66553497 4.23895597 0 0 57
-7.07575274 -12.66823959 4.23876238 0 0 57
-7.07811785 -12.67052746 4.23916817 0 0 58
-6.54147959 -12.46182632 4.32969904 0 0 59
-6.55124331 -12.46563148 4.33014536 0 0 57
-6.58690882 -12.46795273 4.32339144 0 0 56
-6.59273386 -12.46989536 4.32283640 0 0 55
-6.60959482 -12.47213554 4.32025862 0 0 56
-6.64049864 -12.47521019 4.31483412 0 0 58
-6.67105627 -12.47743797 4.30638456 0 0 60
-6.66879702 -12.47910690 4.31014490 0 0 59
-6.70451307 -12.48193169 4.30026674 0 0 59
-6.72137499 -12.48417187 4.29769135 0 0 59
-6.73150873 -12.48623848 4.29594183 0 0 59
-6.75007296 -12.48942280 4.29290152 0 0 62
-6.76648283 -12.49254608 4.29046106 0 0 60
-6.78307676 -12.49479866 4.28692198 0 0 58
-6.79648256 -12.49738312 4.28530741 0 0 57
-6.81158686 -12.50092125 4.28322983 0 0 57
-6.82087183 -12.50251007 4.28171062 0 0 56
-6.83081770 -12.50544739 4.28105974 0 0 56
-6.85023260 -12.50910473 4.27778864 0 0 56
-6.86467409 -12.51129436 4.27484751 0 0 56
-6.86919641 -12.51364231 4.27465630 0 0 56
-6.90190554 -12.51593208 4.26560926 0 0 56
-6.91113329 -12.51976013 4.26412868 0 0 56
-6.90712214 -12.52272034 4.26838827 0 0 57
-6.94373941 -12.52378368 4.25824499 0 0 57
-6.95427084 -12.52719879 4.25639629 0 0 59
-6.96655798 -12.52932549 4.25405073 0 0 60
-6.97650576 -12.53226280 4.25339937 0 0 61
-6.98991060 -12.53485107 4.25178480 0 0 60
-7.00304842 -12.53744984 4.24920702 0 0 58
-7.00972605 -12.53986168 4.24841690 0 0 58
-7.02240896 -12.54334068 4.24597502 0 0 58
-7.03339243 -12.54587936 4.24399519 0 0 58
-7.04288816 -12.54969597 4.24348116 0 0 58
-7.05059958 -12.55170822 4.24136209 0 0 58
-7.05552149 -12.55541134 4.24107599 0 0 58
-7.06434965 -12.55788803 4.23969030 0 0 59
-7.09621000 -12.55970287 4.23087645 0 0 59
-7.08285952 -12.56330681 4.23669195 0 0 59
-7.11229753 -12.56507301 4.22751045 0 0 58
-7.11636782 -12.56830120 4.22745466 0 0 57
-7.12501287 -12.57164955 4.22716761 0 0 56
-7.13056803 -12.57359886 4.22564888 0 0 56
-7.13418722 -12.57770920 4.22572708 0 0 56
-7.14040995 -12.58100128 4.22507524 0 0 56
-7.14421034 -12.58424568 4.22405338 0 0 56
-7.14612722 -12.58741379 4.22459745 0 0 56
-7.15665770 -12.59083366 4.22274923 0 0 56
-7.15660143 -12.59306526 4.22278833 0 0 56
-7.15649652  -12.59753799 4.22286844 0 0 56
-7.19859648 -12.59694862 4.21222305 0 0 55
-7.16697073 -12.60318947 4.22106218 0 0 56
-7.20516157 -12.60383224 4.21151447 0 0 56
-7.19558764 -12.60757923 4.21421003 0 0 56
-7.19547987 -12.61204720 4.21428776 0 0 56
-7.19757986 -12.61434746 4.21373034 0 0 57
-7.20007753 -12.61800003 4.21307707 0 0 56
-7.19827032 -12.62152481 4.21361685 0 0 57
-7.19731188 -12.62552357 4.21392727 0 0 57
-7.18212271 -12.62955666 4.21818113 0 0 58
-7.18677568 -12.63327026 4.21693039 0 0 58
-7.16629744 -12.63807869 4.22058868 0 0 58
-7.16664076 -12.64166832 4.22053194 0 0 58
-7.15243673 -12.64753914 4.22349787 0 0 58
-7.13873720 -12.65028954 4.22628784 0 0 57
-7.12498522 -12.65527916 4.22911835 0 0 58
-7.09628725 -12.66119576 4.23506784 0 0 57
-7.13681555 -12.66102695 4.22382450 0 0 58
-7.13330507 -12.66361046 4.22482300 0 0 58
-7.10721159 -12.66870499 4.23004293 0 0 59
-7.11468363 -12.67382145 4.22906303 0 0 59
-6.52996302 -12.45931149 4.32975054 0 0 61
-6.56020117 -12.46104336 4.32346010 0 0 58
-6.57100058 -12.46445274 4.32257891 0 0 56
-6.60320807 -12.46711922 4.31678724 0 0 56
-6.60948610 -12.46817875 4.31609678 0 0 56
-6.62719774 -12.47089100 4.31328964 0 0 56
-6.65549612 -12.47478676 4.30859518 0 0 59
-6.68781042 -12.47572327 4.29964399 0 0 60
-6.68594980 -12.47874737 4.30330420 0 0 60
-6.72081327 -12.48109818 4.29366112 0 0 60
-6.73767328 -12.48333931 4.29108572 0 0 59
-6.74996233 -12.48546696 4.28874063 0 0 59
-6.76682425 -12.48770714 4.28616190 0 0 60
-6.78278208 -12.49171257 4.28385687 0 0 59
-6.80310202 -12.49360561 4.28031588 0 0 58
-6.81623888 -12.49620438 4.27773905 0 0 57
-6.83049345 -12.49926758 4.27589369 0 0 56
-6.84017611 -12.50221443 4.27427864 0 0 56
-6.85057688 -12.50426674 4.27349138 0 0 56
-6.86756945 -12.50787067 4.26985693 0 0 55
-6.88097143 -12.51045990 4.26824188 0 0 55
-6.88980150 -12.51293373 4.26685762 0 0 55
-6.92211580 -12.51387024 4.25790548 0 0 55
-6.93219423 -12.51816940 4.25619602 0 0 55
-6.93059969 -12.52118301 4.26082134 0 0 56
-6.96695566 -12.52225494 4.24971342 0 0 56
-6.97905779 -12.52525139 4.24846554 0 0 57
-6.98743486 -12.52860641 4.24721527 0 0 59
-6.99495745 -12.53149128 4.24619484 0 0 60
-7.01097059 -12.53326035 4.24385166 0 0 60
-7.02410936 -12.53585815 4.24127436 0 0 60
-7.03163385 -12.53874207 4.24025345 0 0 59
-7.04589128 -12.54180527 4.23841047 0 0 58
-7.05602312 -12.54386711 4.23666048 0 0 59
-7.06655455 -12.54728603 4.23481512 0 0 59
-7.07493353 -12.55064392 4.23356533 0 0 59
-7.08030558 -12.55346203 4.23314333 0 0 59
-7.08698130 -12.55587387 4.23235703 0 0 59
-7.12099504 -12.55775261 4.22294569 0 0 57
-7.10503721 -12.56217575 4.22949171 0 0 58
-7.13950396 -12.56317616 4.21994257 0 0 57
-7.14487696 -12.56599712 4.21952200 0 0 56
-7.15110064 -12.56928921 4.21886873 0 0 56
-7.15862513 -12.57217216 4.21785212 0 0 56
-7.16399813 -12.57499504 4.21743155 0 0 56
-7.17080355 -12.57876968 4.21558475 0 0 55
-7.17487383 -12.58200264 4.21552610 0 0 56
-7.17809153 -12.58476067 4.21570349 0 0 55
-7.18620157 -12.58812714 4.21348810 0 0 55
-7.18439245 -12.59165096 4.21402979 0 0 56
-7.18715906 -12.59529400 4.21433973 0 0 56
-7.22944307 -12.59383583 4.20259666 0 0 55
-7.20109510 -12.60059929 4.21157074 0 0 56
-7.23686171 -12.60118675 4.20165730 0 0 56
-7.22728872 -12.60493851 4.20435047 0 0 56
-7.22959948 -12.60945892 4.20479870 0 0 56
-7.23169947 -12.61175728 4.20424032 0 0 56
-7.23550177 -12.61499786 4.20322132 0 0 56
-7.23539305 -12.61946487 4.20329809 0 0 56
-7.23488760 -12.62258530 4.20347214 0 0 57
-7.21839857 -12.62702942 4.20809507 0 0 57
-7.22565699 -12.62992096 4.20611191 0 0 58
-7.20844889 -12.63525581 4.20990562 0 0 58
-7.20924520 -12.63796234 4.20971203 0 0 58
-7.19764853 -12.64301491 4.21194601 0 0 58
-7.18825769 -12.64589119 4.21354532 0 0 58
-7.17751360 -12.65141106 4.21554852 0 0 59
-7.15599489 -12.65662384 4.22053337 0 0 58
-7.19221544 -12.65633106 4.21048784 0 0 59
-7.18955374 -12.65938568 4.21125555 0 0 59
-7.16391516 -12.66359901 4.21633768 0 0 59
-7.13920069 -12.67188454 4.22016859 0 0 58
-7.13132811 -12.67657661 4.22240210 0 0 61
-6.54886770 -12.45765877 4.32241488 0 0 60
-6.57865763 -12.46027374 4.31625891 0 0 58
-6.58841848 -12.46408081 4.31670570 0 0 56
-6.61865664 -12.46581554 4.31041288 0 0 56
-6.62493277 -12.46687317 4.30972290 0 0 56
-6.64506769 -12.46963882 4.30728006 0 0 57
-6.67094564 -12.47348213 4.30222273 0 0 59
-6.70540953 -12.47447968 4.29267311 0 0 61
-6.70355272 -12.47750282 4.29633760 0 0 61
-6.73626089 -12.47979069 4.28728628 0 0 61
-6.75442743 -12.48162460 4.28434610 0 0 60
-6.76886702 -12.48381615 4.28140068 0 0 59
-6.78527880 -12.48693657 4.27895975 0 0 59
-6.80253839 -12.49053001 4.27628803 0 0 58
-6.82070589 -12.49236298 4.27334452 0 0 58
-6.83496046 -12.49542427 4.27149963 0 0 57
-6.84921503 -12.49848366 4.26965427 0 0 56
-6.85804510 -12.50095844 4.26827288 0 0 56
-6.86948252 -12.50261211 4.26615477 0 0 55
-6.88759184 -12.50667953 4.26324987 0 0 54
-6.90073156 -12.50928020 4.26067448 0 0 54
-6.91113043 -12.51133442 4.25988674 0 0 55
-6.94402456 -12.51275158 4.24974394 0 0 54
-6.95482206 -12.51615906 4.24885988 0 0 55
-6.95166254 -12.51959038 4.25288677 0 0 56
-6.98697710 -12.52106285 4.24311018 0 0 56
-7.00096750 -12.52413273 4.24029875 0 0 56
-7.01006460 -12.52659607 4.23987818 0 0 57
-7.01543570 -12.52941799 4.23945856 0 0 58
-7.03184652 -12.53254223 4.23701620 0 0 59
-7.04413176 -12.53466606 4.23466969 0 0 60
-7.05511618 -12.53720284 4.23268890 0 0 59
-7.07067633 -12.53985596 4.23047829 0 0 58
-7.07793474 -12.54274940 4.22849512 0 0 59
-7.08788347 -12.54568386 4.22784281 0 0 59
-7.09671164 -12.54816055 4.22645950 0 0 60
-7.10509157 -12.55151367 4.22521305 0 0 59
-7.11131525 -12.55480957 4.22455931 0 0 58
-7.14923525 -12.55545998 4.21404886 0 0 57
-7.12982416 -12.56022930 4.22155714 0 0 57
-7.16689348 -12.56040764 4.21128035 0 0 56
-7.17266321 -12.56458187 4.21076059 0 0 56
-7.17803717 -12.56740379 4.21034050 0 0 56
-7.18471384 -12.56981468 4.20955420 0 0 56
-7.19179010 -12.57358360 4.20866966 0 0 55
-7.19931364 -12.57646561 4.20765209 0 0 55
-7.20396757 -12.58017921 4.20640039 0 0 55
-7.20848703 -12.58252716 4.20621109 0 0 55
-7.21529245 -12.58630371 4.20436335 0 0 55
-7.21420527 -12.58893585 4.20573330 0 0 55
-7.21912622 -12.59264183 4.20544577 0 0 55
-7.25965357 -12.59247398 4.19420290 0 0 56
-7.23175573 -12.59835720 4.20304441 0 0 56
-7.27012968 -12.59812641 4.19239664 0 0 55
-7.26010275 -12.60275650 4.19522667 0 0 56
-7.26502466 -12.60645866 4.19493961 0 0 56
-7.26582003 -12.60916615 4.19475079 0 0 56
-7.27047586 -12.61287880 4.19349813 0 0 56
-7.27212000 -12.61606026 4.19307613 0 0 56
-7.27273226 -12.61963654 4.19398355 0 0 56
-7.25597525 -12.62409019 4.19763947 0 0 57
-7.26323652 -12.62698555 4.19565964 0 0 57
-7.24818087 -12.63238144 4.19885588 0 0 57
-7.24767256 -12.63549805 4.19903088 0 0 58
-7.23823023 -12.64061356 4.20066690 0 0 58
-7.23041296 -12.64306831 4.20286131 0 0 58
-7.22357512 -12.64736176 4.20376539 0 0 59
-7.20793486 -12.65227890 4.20815659 0 0 59
-7.24070024 -12.65233231 4.19906855 0 0 59
-7.24149656 -12.65503693 4.19887829 0 0 59
-7.22016287 -12.65937805 4.20276737 0 0 59
-7.19917727 -12.66730595 4.20659637 0 0 58
-7.15350485 -12.67544746 4.21520042 0 0 59
-7.15129709 -12.67762184 4.21583652 0 0 60
-6.53830481 -12.45388126 4.31907892 0 0 60
-6.56386423 -12.45723152 4.31617689 0 0 60
-6.59280062 -12.45937920 4.31025076 0 0 58
-6.60274839 -12.46231365 4.30959892 0 0 57
-6.63495684 -12.46498108 4.30380964 0 0 56
-6.64181757 -12.46652031 4.30192327 0 0 57
-6.66240549 -12.46840477 4.29934549 0 0 58
-6.68940020 -12.47270966 4.29502058 0 0 60
-6.72040796 -12.47405815 4.28643322 0 0 62
-6.71985197 -12.47666931 4.28972864 0 0 61
-6.75040770 -12.47889709 4.28128099 0 0 61
-6.77072477 -12.48078918 4.27774096 0 0 60
-6.78517103 -12.48298073 4.27479601 0 0 60
-6.80287981 -12.48569298 4.27199030 0 0 58
-6.82013941 -12.48928833 4.26931620 0 0 58
-6.83745623 -12.49064636 4.26660585 0 0 57
-6.85171175 -12.49370766 4.26476145 0 0 56
-6.86596823 -12.49676800 4.26291513 0 0 55
-6.87564707 -12.49971581 4.26130152 0 0 55
-6.88820314 -12.50183296 4.25991488 0 0 55
-6.90734911 -12.50550079 4.25568485 0 0 54
-6.92421198 -12.50774193 4.25310707 0 0 54
-6.93304014 -12.51021576 4.25172615 0 0 54
-6.96535540 -12.51115036 4.24277258 0 0 54
-6.97830534 -12.51461887 4.24129105 0 0 55
-6.97514391 -12.51805305 4.24532080 0 0 55
-7.00934267 -12.51906204 4.23481035 0 0 55
-7.02229643 -12.52253342 4.23333120 0 0 56
-7.03197718 -12.52547836 4.23171520 0 0 56
-7.03891897 -12.52787971 4.23189116 0 0 57
-7.05290651 -12.53095245 4.22908258 0 0 58
-7.06304026 -12.53301811 4.22733355 0 0 59
-7.07644510 -12.53560352 4.22571802 0 0 59
-7.09415579 -12.53831673 4.22291136 0 0 59
-7.10271788 -12.54080009 4.22056198 0 0 59
-7.11136484 -12.54414749 4.22027636 0 0 59
-7.11889029 -12.54703045 4.21925879 0 0 60
-7.12857199 -12.54997635 4.21764421 0 0 60
-7.13824987 -12.55292225 4.21602964 0 0 58
-7.17486906 -12.55398369 4.20588589 0 0 58
-7.15806532 -12.55793285 4.21266127 0 0 57
-7.19468546 -12.55899429 4.20251751 0 0 57
-7.19830084 -12.56310654 4.20259857 0 0 56
-7.20412493 -12.56504536 4.20204306 0 0 56
-7.21165037 -12.56793022 4.20102453 0 0 55
-7.21917772 -12.57081413 4.20000553 0 0 55
-7.22755575 -12.57417107 4.19875622 0 0 55
-7.23332739 -12.57834435 4.19823885 0 0 55
-7.23673105 -12.58023262 4.19731379 0 0 55
-7.24510813 -12.58359146 4.19606638 0 0 55
-7.24617052 -12.58628464 4.19683695 0 0 55
-7.24951982 -12.59040833 4.19595385 0 0 55
-7.28920031 -12.58976746 4.18494368 0 0 56
-7.26215124 -12.59612370 4.19354725 0 0 56
-7.30294847 -12.59594345 4.18327141 0 0 56
-7.29291964 -12.60057354 4.18610048 0 0 56
-7.30129766 -12.60392952 4.18485117 0 0 56
-7.30339670 -12.60622978 4.18429708 0 0 56
-7.30589724 -12.60988045 4.18364191 0 0 56
-7.30839682 -12.61353207 4.18298864 0 0 56
-7.30946016 -12.61622810 4.18375731 0 0 56
-7.29485846 -12.62074280 4.18682051 0 0 56
-7.30192995 -12.62450790 4.18593693 0 0 57
-7.28732729 -12.62902641 4.18900204 0 0 57
-7.28812551 -12.63173103 4.18880749 0 0 57
-7.27868128 -12.63684464 4.19044542 0 0 57
-7.27086210 -12.63930130 4.19263887 0 0 58
-7.26703024 -12.64412880 4.19271755 0 0 59
-7.25328016 -12.64911652 4.19554758 0 0 59
-7.28630972 -12.64915943 4.18742514 0 0 59
-7.28971434 -12.65104771 4.18650198 0 0 59
-7.27425814 -12.65509033 4.18979406 0 0 59
-7.26103830 -12.66279793 4.19146967 0 0 58
-7.21608782 -12.67004967 4.20090008 0 0 58
-7.20885420 -12.67298985 4.20189905 0 0 58
-7.17036676 -12.68042755 4.20954180 0 0 60
-6.53540373 -12.45161629 4.31674337 0 0 60
-6.55460119 -12.45304871 4.31247234 0 0 60
-6.57931471 -12.45592880 4.30980158 0 0 60
-6.60668135 -12.45849228 4.30327940 0 0 58
-6.61904860 -12.46148109 4.30299377 0 0 57
-6.65125608 -12.46414566 4.29720163 0 0 57
-6.65838385 -12.46567726 4.29628229 0 0 57
-6.67766619 -12.46796989 4.29406977 0 0 60
-6.70569944 -12.47187901 4.28841400 0 0 62
-6.73428392 -12.47316933 4.27946329 0 0 62
-6.73399687 -12.47577286 4.28372049 0 0 62
-6.76585722 -12.47759247 4.27490568 0 0 59
-6.78572512 -12.48036766 4.27150202 0 0 59
-6.79931307 -12.48208332 4.26878881 0 0 60
-6.81917906 -12.48485851 4.26538420 0 0 58
-6.83670855 -12.48844242 4.26367617 0 0 57
-6.85375643 -12.48981476 4.25999832 0 0 57
-6.86801100 -12.49287605 4.25815344 0 0 56
-6.88311815 -12.49640846 4.25608015 0 0 55
-6.89585829 -12.49765396 4.25359869 0 0 55
-6.90926504 -12.50024128 4.25198221 0 0 54
-6.92782640 -12.50342560 4.24894524 0 0 54
-6.94553995 -12.50614166 4.24613762 0 0 54
-6.95436907 -12.50861454 4.24475288 0 0 55
-6.98537779 -12.50995827 4.23616743 0 0 55
-6.99806166 -12.51344109 4.23372698 0 0 55
-6.99535418 -12.51599121 4.23761749 0 0 55
-7.03066778 -12.51745987 4.22783852 0 0 56
-7.04335546 -12.52094078 4.22539520 0 0 56
-7.05545855 -12.52393913 4.22414780 0 0 55
-7.06213236 -12.52635002 4.22336149 0 0 56
-7.07423258 -12.52934837 4.22211218 0 0 57
-7.08436823 -12.53141403 4.22036219 0 0 57
-7.09534979 -12.53395081 4.21837950 0 0 59
-7.11306524 -12.53666306 4.21557474 0 0 60
-7.12489748 -12.53967285 4.21336222 0 0 60
-7.13484526 -12.54260826 4.21271086 0 0 60
-7.14125204 -12.54503059 4.21096087 0 0 60
-7.15205145 -12.54843903 4.21007633 0 0 60
-7.16303682 -12.55097580 4.20809793 0 0 58
-7.19749975 -12.55197334 4.19854879 0 0 58
-7.18500376 -12.55604649 4.20413589 0 0 57
-7.21901655 -12.55792809 4.19472122 0 0 57
-7.22308588 -12.56115913 4.19466734 0 0 56
-7.22976160 -12.56357098 4.19387722 0 0 56
-7.23859072 -12.56604195 4.19249249 0 0 56
-7.24611807 -12.56892872 4.19147539 0 0 55
-7.25449419 -12.57228470 4.19022703 0 0 56
-7.25941515 -12.57598877 4.18993950 0 0 55
-7.26478720 -12.57880783 4.18951654 0 0 55
-7.27662134 -12.58181763 4.18730593 0 0 55
-7.27656889 -12.58405113 4.18734407 0 0 56
-7.27933455 -12.58769226 4.18765736 0 0 56
-7.31771040 -12.58746147 4.17700958 0 0 56
-7.29281473 -12.59387970 4.18502188 0 0 56
-7.32988691 -12.59405899 4.17474079 0 0 56
-7.32358408 -12.59833145 4.17757320 0 0 56
-7.33169413 -12.60169983 4.17536068 0 0 57
-7.33536386 -12.60357475 4.17540169 0 0 57
-7.34113359 -12.60775185 4.17488432 0 0 56
-7.34193373 -12.61045647 4.17469072 0 0 57
-7.34573603 -12.61370182 4.17367268 0 0 57
-7.33225107 -12.61867332 4.17746592 0 0 56
-7.33865976 -12.62109947 4.17571497 0 0 56
-7.32705927 -12.62614727 4.17794704 0 0 56
-7.32785845 -12.62885666 4.17775679 0 0 56
-7.32083464 -12.63402081 4.17975950 0 0 57
-7.31405210 -12.63607979 4.18062687 0 0 57
-7.30918360 -12.64130783 4.18203402 0 0 58
-7.29745340 -12.64499474 4.18532991 0 0 59
-7.32995081 -12.64505959 4.17527723 0 0 58
-7.33447313 -12.64740658 4.17508554 0 0 59
-7.32274294 -12.65109348 4.17837811 0 0 59
-7.31558275 -12.65763187 4.17835951 0 0 58
-7.28167200 -12.66518593 4.18577003 0 0 58
-7.27619410 -12.66683006 4.18627024 0 0 58
-7.23137331 -12.67544937 4.19464159 0 0 58
-7.19810152 -12.68125153 4.20081997 0 0 59
-7.18022776 -12.68524265 4.20374489 0 0 62
-6.52334929 -12.44912052 4.31487226 0 0 61
-6.55085135 -12.45031166 4.31036997 0 0 59
-6.56874990 -12.45215130 4.30646563 0 0 60
-6.59188890 -12.45545006 4.30319500 0 0 59
-6.62082529 -12.45759583 4.29726744 0 0 58
-6.63404608 -12.46105480 4.29675436 0 0 58
-6.66625452 -12.46372223 4.29096556 0 0 58
-6.67253160 -12.46478271 4.29027224 0 0 58
-6.69069338 -12.46661186 4.28732920 0 0 60
-6.71899462 -12.47051048 4.28263474 0 0 63
-6.74843168 -12.47227287 4.27345610 0 0 61
-6.74814272 -12.47488022 4.27771235 0 0 60
-6.78345823 -12.47634888 4.26793528 0 0 58
-6.80202341 -12.47953415 4.26489592 0 0 58
-6.81476164 -12.48077774 4.26241255 0 0 59
-6.83462954 -12.48355579 4.25900984 0 0 57
-6.85431242 -12.48719978 4.25670481 0 0 56
-6.87005472 -12.48898125 4.25339460 0 0 56
-6.88561487 -12.49163246 4.25118446 0 0 55
-6.90202379 -12.49475479 4.24874353 0 0 55
-6.91542959 -12.49734306 4.24712706 0 0 55
-6.92928553 -12.49904823 4.24537992 0 0 55
-6.94843340 -12.50271797 4.24114752 0 0 55
-6.96659994 -12.50454903 4.23820448 0 0 55
-6.97282267 -12.50784302 4.23755217 0 0 55
-7.00885725 -12.50841904 4.22860193 0 0 55
-7.02024221 -12.51231194 4.22652388 0 0 56
-7.01622820 -12.51527023 4.23078203 0 0 56
-7.04912233 -12.51669121 4.22063780 0 0 56
-7.06252813 -12.51927948 4.21902227 0 0 56
-7.07593393 -12.52186775 4.21740961 0 0 55
-7.08215570 -12.52516174 4.21675634 0 0 56
-7.09529448 -12.52776051 4.21417952 0 0 56
-7.10785246 -12.52987671 4.21279430 0 0 56
-7.11622477 -12.53322983 4.21154594 0 0 58
-7.13066721 -12.53542042 4.20860195 0 0 59
-7.14407110 -12.53801250 4.20699024 0 0 60
-7.15590525 -12.54101849 4.20477676 0 0 60
-7.16428328 -12.54437351 4.20352793 0 0 61
-7.17468309 -12.54642868 4.20273972 0 0 61
-7.18521166 -12.54984665 4.20089531 0 0 59
-7.22183180 -12.55090523 4.19074869 0 0 59
-7.20633173 -12.55444813 4.19716406 0 0 58
-7.24079752 -12.55544662 4.18761635 0 0 58
-7.24786997 -12.55920982 4.18673372 0 0 57
-7.25454760 -12.56162453 4.18594551 0 0 57
-7.26337385 -12.56409645 4.18456221 0 0 56
-7.27175283 -12.56745338 4.18331242 0 0 56
-7.28012896 -12.57080841 4.18206644 0 0 56
-7.28635263 -12.57410145 4.18140888 0 0 56
-7.29172659 -12.57692337 4.18098974 0 0 56
-7.30271006 -12.57946110 4.17900896 0 0 56
-7.30350447 -12.58216667 4.17881823 0 0 56
-7.30842352 -12.58587074 4.17852736 0 0 56
-7.34594774 -12.58516693 4.16811514 0 0 57
-7.32105780 -12.59158611 4.17612553 0 0 56
-7.35682535 -12.59217453 4.16621208 0 0 57
-7.35097551 -12.59556580 4.16890955 0 0 57
-7.35647821 -12.59974957 4.16742754 0 0 58
-7.36230326 -12.60169029 4.16687107 0 0 58
-7.37198210 -12.60463428 4.16525507 0 0 57
-7.37448263 -12.60828781 4.16460228 0 0 58
-7.37855101 -12.61151886 4.16454935 0 0 58
-7.36897707 -12.61526871 4.16724300 0 0 57
-7.37408113 -12.61810017 4.16585827 0 0 56
-7.36248446 -12.62314701 4.16809034 0 0 56
-7.36543417 -12.62591648 4.16730499 0 0 56
-7.35971689 -12.63067245 4.16894150 0 0 57
-7.35405207 -12.63319492 4.17053938 0 0 57
-7.35093927 -12.63713074 4.17144537 0 0 57
-7.33979368 -12.64129829 4.17354441 0 0 58
-7.37210512 -12.64223194 4.16459227 0 0 58
-7.37707853 -12.64369965 4.16426706 0 0 58
-7.36593103 -12.64787102 4.16636610 0 0 59
-7.36276674 -12.65403938 4.16731071 0 0 59
-7.33707380 -12.66049194 4.17243147 0 0 59
-7.33459711 -12.66267014 4.17210245 0 0 59
-7.30113840 -12.66934586 4.17937946 0 0 58
-7.26871252 -12.67561722 4.18532610 0 0 58
-7.23301649 -12.68136692 4.19113779 0 0 58
-7.20184469 -12.68946552 4.19675732 0 0 62
-6.53880072 -12.44781494 4.30849695 0 0 59
-6.56427622 -12.45030689 4.30353212 0 0 59
-6.58074141 -12.45119476 4.30105543 0 0 59
-6.60603380 -12.45455742 4.29718685 0 0 59
-6.63497210 -12.45670128 4.29126024 0 0 58
-6.64733934 -12.45968819 4.29097605 0 0 59
-6.67954779 -12.46235466 4.28518534 0 0 59
-6.68640661 -12.46389675 4.28330088 0 0 59
-6.70484209 -12.46571922 4.28132105 0 0 60
-6.73313951 -12.46961403 4.27662849 0 0 62
-6.76387930 -12.47097111 4.26707983 0 0 61
-6.76489687 -12.47316170 4.27097321 0 0 59
-6.80106211 -12.47510529 4.26096344 0 0 58
-6.81662035 -12.47775650 4.25875235 0 0 58
-6.83106184 -12.47994423 4.25580931 0 0 58
-6.84962511 -12.48313141 4.25276995 0 0 57
-6.86845636 -12.48630619 4.25069666 0 0 55
-6.88635588 -12.48814774 4.24678850 0 0 55
-6.90406752 -12.49086189 4.24398279 0 0 55
-6.92074442 -12.49397469 4.24250364 0 0 55
-6.93303061 -12.49610043 4.24015856 0 0 55
-6.94643545 -12.49868584 4.23854303 0 0 55
-6.96603823 -12.50147438 4.23417568 0 0 55
-6.98577356 -12.50288773 4.23183107 0 0 56
-6.99284792 -12.50665092 4.23094654 0 0 56
-7.02991629 -12.50683212 4.22066641 0 0 58
-7.03914690 -12.51065922 4.21918583 0 0 58
-7.03598642 -12.51409340 4.22321463 0 0 56
-7.06699419 -12.51543617 4.21462870 0 0 56
-7.08098269 -12.51850796 4.21181917 0 0 55
-7.09438562 -12.52109528 4.21020842 0 0 55
-7.10191393 -12.52397919 4.20918989 0 0 55
-7.11577082 -12.52568626 4.20743895 0 0 56
-7.12890863 -12.52828598 4.20486307 0 0 56
-7.13800478 -12.53074932 4.20444107 0 0 57
-7.15068960 -12.53422928 4.20200014 0 0 58
-7.16297770 -12.53635597 4.19965267 0 0 59
-7.17593050 -12.53982544 4.19817352 0 0 60
-7.18475866 -12.54230118 4.19678736 0 0 61
-7.19704771 -12.54442978 4.19444036 0 0 61
-7.20784521 -12.54783630 4.19355917 0 0 60
-7.24419832 -12.54890823 4.18245173 0 0 60
-7.22765684 -12.55284691 4.19019270 0 0 58
-7.26297235 -12.55431747 4.18041515 0 0 58
-7.27004766 -12.55808163 4.17953253 0 0 58
-7.27802515 -12.56008339 4.17837620 0 0 57
-7.28770971 -12.56303120 4.17676306 0 0 57
-7.29653788 -12.56550598 4.17537928 0 0 57
-7.30621767 -12.56845284 4.17376566 0 0 57
-7.31374407 -12.57133675 4.17274761 0 0 56
-7.31781435 -12.57456589 4.17268896 0 0 56
-7.32619143 -12.57792187 4.17144156 0 0 57
-7.32828951 -12.58021927 4.17088413 0 0 57
-7.33536482 -12.58398438 4.16999912 0 0 57
-7.37289095 -12.58328056 4.15958548 0 0 58
-7.34956694 -12.58927917 4.16819382 0 0 57
-7.38533545 -12.58986664 4.15828085 0 0 57
-7.37876558 -12.59415150 4.16015005 0 0 57
-7.38498926 -12.59744453 4.15949488 0 0 57
-7.38950872 -12.59979439 4.15930700 0 0 58
-7.39892244 -12.60275269 4.15672731 0 0 58
-7.40299082 -12.60597992 4.15667057 0 0 59
-7.40464067 -12.60916138 4.15624809 0 0 59
-7.40179586 -12.61308861 4.15811634 0 0 58
-7.40689993 -12.61591721 4.15672970 0 0 57
-7.39660311 -12.62055779 4.15860033 0 0 56
-7.40085936 -12.62291718 4.15744448 0 0 56
-7.39599085 -12.62814713 4.15885448 0 0 56
-7.39077806 -12.62978363 4.16031790 0 0 57
-7.39067030 -12.63425541 4.16039419 0 0 57
-7.37979174 -12.63841343 4.16345835 0 0 58
-7.41255331 -12.63846779 4.15437222 0 0 57
-7.41707659 -12.64081573 4.15417814 0 0 58
-7.40938807 -12.64463615 4.15531683 0 0 58
-7.40595579 -12.65082073 4.15529680 0 0 59
-7.38444090 -12.65602875 4.16028309 0 0 60
-7.38438368 -12.65826416 4.16032076 0 0 60
-7.35999250 -12.66430283 4.16507721 0 0 59
-7.33690596 -12.66993332 4.16946602 0 0 58
-7.31184912 -12.67463017 4.17335320 0 0 58
-7.26918554 -12.68330956 4.18112803 0 0 58
-7.25072718 -12.68681908 4.18524837 0 0 59
-7.22005987 -12.69180012 4.19069290 0 0 61
-6.53195715 -12.44368172 4.30516052 0 0 58
-6.55267668 -12.44692993 4.30152273 0 0 59
-6.57757044 -12.44894028 4.29775572 0 0 58
-6.59331560 -12.45071793 4.29444551 0 0 59
-6.62017965 -12.45366001 4.29117918 0 0 58
-6.64911604 -12.45580482 4.28525305 0 0 58
-6.66018152 -12.45920181 4.28533459 0 0 59
-6.69212389 -12.46187878 4.27857924 0 0 59
-6.70055628 -12.46300125 4.27729177 0 0 59
-6.71983862 -12.46529388 4.27508211 0 0 60
-6.74943686 -12.46878147 4.27002430 0 0 61
-6.77887774 -12.47054672 4.26084089 0 0 61
-6.78119421 -12.47232819 4.26436758 0 0 59
-6.81520700 -12.47420883 4.25495481 0 0 58
-6.83161688 -12.47733116 4.25251293 0 0 58
-6.84520674 -12.47904682 4.24980021 0 0 57
-6.86377192 -12.48223495 4.24676085 0 0 56
-6.88606024 -12.48506355 4.24372625 0 0 55
-6.90552855 -12.48648453 4.24041605 0 0 55
-6.92194033 -12.48960686 4.23797464 0 0 55
-6.93834829 -12.49273109 4.23553371 0 0 55
-6.95063448 -12.49485970 4.23318720 0 0 55
-6.96233797 -12.49650002 4.23203373 0 0 55
-6.98520994 -12.49981117 4.22780180 0 0 56
-7.00207281 -12.50205421 4.22522259 0 0 58
-7.01175165 -12.50499916 4.22360849 0 0 58
-7.04276037 -12.50634384 4.21502447 0 0 60
-7.05329180 -12.50976372 4.21317863 0 0 59
-7.05169916 -12.51277351 4.21780348 0 0 57
-7.08590078 -12.51378441 4.20729256 0 0 55
-7.09988546 -12.51685619 4.20448542 0 0 55
-7.11329317 -12.51944160 4.20287037 0 0 55
-7.12193823 -12.52278900 4.20258331 0 0 55
-7.13579416 -12.52449608 4.20083570 0 0 55
-7.14893293 -12.52709579 4.19825935 0 0 56
-7.15861368 -12.53003979 4.19664145 0 0 56
-7.17174959 -12.53263855 4.19406509 0 0 57
-7.18300295 -12.53516674 4.19304800 0 0 57
-7.19483519 -12.53817558 4.19083691 0 0 59
-7.20366621 -12.54064751 4.18945265 0 0 60
-7.21661711 -12.54411697 4.18797398 0 0 62
-7.23020887 -12.54583549 4.18526030 0 0 61
-7.26467371 -12.54683495 4.17571211 0 0 60
-7.24956942 -12.55172825 4.18202877 0 0 59
-7.28775930 -12.55236530 4.17248249 0 0 58
-7.29398108 -12.55566216 4.17183018 0 0 59
-7.30065775 -12.55807304 4.17104483 0 0 58
-7.31033850 -12.56102180 4.16943026 0 0 57
-7.31916761 -12.56349373 4.16804218 0 0 57
-7.33100271 -12.56650162 4.16583204 0 0 58
-7.34049749 -12.57031822 4.16531515 0 0 58
-7.34475279 -12.57268143 4.16416121 0 0 57
-7.35358000 -12.57515430 4.16277790 0 0 57
-7.35419321 -12.57873154 4.16368246 0 0 57
-7.36171961 -12.58161736 4.16266775 0 0 58
-7.39421511 -12.58167934 4.15261698 0 0 59
-7.37781000 -12.58698463 4.15929842 0 0 57
-7.41011858 -12.58792114 4.15034723 0 0 58
-7.40727282 -12.59184456 4.15221739 0 0 57
-7.41322851 -12.59514809 4.15060091 0 0 57
-7.41775084 -12.59749699 4.15041113 0 0 57
-7.42527723 -12.60038185 4.14939308 0 0 57
-7.42777395 -12.60403538 4.14874077 0 0 58
-7.42942476 -12.60721207 4.14831543 0 0 58
-7.42703295 -12.61025906 4.15005159 0 0 58
-7.43644381 -12.61321259 4.14747286 0 0 57
-7.43072653 -12.61796761 4.14911032 0 0 56
-7.43413019 -12.61985779 4.14818382 0 0 56
-7.43056345 -12.62467384 4.14922762 0 0 56
-7.42490053 -12.62719345 4.15082598 0 0 56
-7.42694521 -12.63172340 4.15030718 0 0 57
-7.41867208 -12.63506603 4.15263700 0 0 57
-7.45228910 -12.63559151 4.14331961 0 0 57
-7.45680857 -12.63794136 4.14312887 0 0 58
-7.44984007 -12.64086914 4.14509439 0 0 58
-7.44856119 -12.64711189 4.14447832 0 0 59
-7.42789221 -12.65279675 4.14923382 0 0 60
-7.42783976 -12.65503120 4.14927435 0 0 60
-7.41148329 -12.66083717 4.15283537 0 0 59
-7.39360762 -12.66482925 4.15576124 0 0 59
-7.37528086 -12.66970444 4.15882206 0 0 59
-7.35259199 -12.67668438 4.16311407 0 0 58
-7.33804274 -12.67896843 4.16613436 0 0 58
-7.29973936 -12.68553543 4.17267752 0 0 58
-7.24284792 -12.69424820 4.18439913 0 0 59
-7.24422884 -12.69744110 4.18301105 0 0 58
-6.53721952 -12.44254875 4.30057764 0 0 58
-6.56466722 -12.44597244 4.29611254 0 0 59
-6.59041548 -12.44845009 4.29211378 0 0 58
-6.60530615 -12.44975853 4.28903437 0 0 58
-6.63217115 -12.45269966 4.28576708 0 0 58
-6.66083670 -12.45485497 4.27887678 0 0 58
-6.67320776 -12.45784378 4.27859211 0 0 59
-6.70541716 -12.46051025 4.27280426 0 0 58
-6.71384859 -12.46163273 4.27151299 0 0 59
-6.73398447 -12.46439934 4.26907539 0 0 60
-6.76488447 -12.46747494 4.26364756 0 0 61
-6.79432440 -12.46923828 4.25446367 0 0 60
-6.79403734 -12.47184372 4.25872660 0 0 60
-6.82890081 -12.47419548 4.24908209 0 0 58
-6.84661436 -12.47690773 4.24627447 0 0 57
-6.86065626 -12.47774506 4.24342680 0 0 56
-6.88137484 -12.48099136 4.23979330 0 0 55
-6.90451384 -12.48428917 4.23652315 0 0 55
-6.92267942 -12.48612213 4.23358154 0 0 55
-6.93823862 -12.48877430 4.23137045 0 0 55
-6.95509958 -12.49101734 4.22879267 0 0 55
-6.96738482 -12.49314117 4.22644472 0 0 55
-6.97948980 -12.49614048 4.22519827 0 0 55
-7.00366354 -12.49903774 4.22059965 0 0 56
-7.01837301 -12.50121975 4.21862030 0 0 58
-7.02720118 -12.50369549 4.21723795 0 0 60
-7.05605364 -12.50497627 4.20924950 0 0 60
-7.06959105 -12.50892830 4.20657349 0 0 58
-7.06715059 -12.51146889 4.21143007 0 0 57
-7.10435438 -12.51301193 4.20009041 0 0 55
-7.11860800 -12.51607323 4.19824839 0 0 55
-7.13201475 -12.51866055 4.19663382 0 0 55
-7.14025831 -12.52065277 4.19644117 0 0 55
-7.15555429 -12.52331543 4.19326735 0 0 55
-7.16738653 -12.52632332 4.19105625 0 0 56
-7.17778540 -12.52837658 4.19026804 0 0 56
-7.19177485 -12.53145027 4.18746138 0 0 56
-7.20406294 -12.53357410 4.18511391 0 0 56
-7.21485949 -12.53698254 4.18422985 0 0 57
-7.22368956 -12.53945732 4.18284798 0 0 59
-7.23467398 -12.54199505 4.18086624 0 0 60
-7.24807787 -12.54458237 4.17925215 0 0 62
-7.28469706 -12.54564285 4.16910791 0 0 60
-7.27304983 -12.55019188 4.17446280 0 0 59
-7.31123781 -12.55082893 4.16491461 0 0 60
-7.31661367 -12.55365372 4.16449451 0 0 60
-7.32413912 -12.55653572 4.16347551 0 0 58
-7.33382082 -12.55948257 4.16186190 0 0 58
-7.34264803 -12.56195641 4.16047716 0 0 58
-7.35318232 -12.56537437 4.15863085 0 0 59
-7.36286020 -12.56831837 4.15701485 0 0 60
-7.37110472 -12.57031059 4.15682554 0 0 59
-7.38163805 -12.57373238 4.15497971 0 0 59
-7.38113451 -12.57684708 4.15515471 0 0 58
-7.38520002 -12.58007812 4.15510035 0 0 58
-7.41639376 -12.58055210 4.14541435 0 0 58
-7.40389681 -12.58462715 4.15100098 0 0 58
-7.43360090 -12.58638191 4.14278269 0 0 57
-7.43336248 -12.58948898 4.14391851 0 0 57
-7.43931818 -12.59278965 4.14230490 0 0 57
-7.44469118 -12.59561253 4.14187956 0 0 57
-7.45351934 -12.59808731 4.14049768 0 0 56
-7.45601797 -12.60173798 4.13984346 0 0 57
-7.45923662 -12.60449600 4.14001799 0 0 57
-7.45266771 -12.60878181 4.14188623 0 0 57
-7.46580362 -12.61137772 4.13930798 0 0 56
-7.46269178 -12.61531639 4.14021397 0 0 56
-7.46564245 -12.61808395 4.13942862 0 0 56
-7.46468306 -12.62208176 4.13973570 0 0 56
-7.45902014 -12.62460136 4.14133501 0 0 56
-7.46282053 -12.62784672 4.14031553 0 0 56
-7.45736837 -12.63258934 4.14291525 0 0 57
-7.48928213 -12.63217258 4.13405991 0 0 57
-7.49138117 -12.63446808 4.13350344 0 0 58
-7.48611689 -12.63834286 4.13500738 0 0 58
-7.48555613 -12.64369488 4.13521862 0 0 59
-7.46834612 -12.64903069 4.13901186 0 0 60
-7.46914244 -12.65173721 4.13882113 0 0 59
-7.45754385 -12.65678406 4.14105368 0 0 60
-7.44339418 -12.66042233 4.14397860 0 0 60
-7.42982912 -12.66453457 4.14571285 0 0 60
-7.41732550 -12.67134857 4.14821434 0 0 59
-7.40623331 -12.67328262 4.15027285 0 0 59
-7.38099337 -12.67885017 4.15525866 0 0 59
-7.32599020 -12.68763924 4.16542006 0 0 58
-7.32090616 -12.69063759 4.16582441 0 0 58
-7.26832056 -12.69947910 4.17635393 0 0 58
-6.54633760 -12.44242096 4.29493093 0 0 57
-6.57593966 -12.44590569 4.28987169 0 0 58
-6.60213900 -12.44750214 4.28573751 0 0 58
-6.61729860 -12.44880104 4.28362226 0 0 58
-6.64474535 -12.45222664 4.27916098 0 0 57
-6.67368174 -12.45436954 4.27323389 0 0 58
-6.68605185 -12.45735931 4.27295065 0 0 58
-6.72086573 -12.45920658 4.26642847 0 0 58
-6.72799444 -12.46073723 4.26550531 0 0 59
-6.74727678 -12.46302891 4.26329422 0 0 61
-6.77661276 -12.46652603 4.25727367 0 0 61
-6.80716562 -12.46875381 4.24882364 0 0 59
-6.80818033 -12.47094727 4.25271749 0 0 59
-6.84219599 -12.47282600 4.24330378 0 0 58
-6.86075830 -12.47601128 4.24026680 0 0 57
-6.87695456 -12.47690964 4.23682165 0 0 56
-6.89897585 -12.47974777 4.23281956 0 0 55
-6.92211580 -12.48304558 4.22955179 0 0 55
-6.93897867 -12.48528862 4.22697544 0 0 56
-6.95368624 -12.48746681 4.22499704 0 0 55
-6.97139978 -12.49018288 4.22218752 0 0 56
-6.98525763 -12.49188805 4.22043800 0 0 55
-6.99839640 -12.49448872 4.21786261 0 0 56
-7.02068377 -12.49731541 4.21482372 0 0 57
-7.03381968 -12.49991226 4.21224499 0 0 58
-7.04134703 -12.50279617 4.21122646 0 0 60
-7.07105017 -12.50455379 4.20301008 0 0 59
-7.08961535 -12.50773907 4.19996977 0 0 58
-7.08475256 -12.51022530 4.20445967 0 0 56
-7.12137175 -12.51128864 4.19431353 0 0 55
-7.13751459 -12.51441956 4.19090891 0 0 55
-7.15177202 -12.51748085 4.18906355 0 0 55
-7.15956354 -12.52035427 4.18900824 0 0 55
-7.17427206 -12.52253246 4.18702936 0 0 55
-7.18525553 -12.52506638 4.18504572 0 0 55
-7.19538736 -12.52713299 4.18329954 0 0 55
-7.21224833 -12.52937698 4.18072128 0 0 55
-7.22538614 -12.53197479 4.17814302 0 0 56
-7.23618555 -12.53538132 4.17726231 0 0 57
-7.24475050 -12.53786850 4.17491198 0 0 57
-7.25384855 -12.54033089 4.17449474 0 0 58
-7.26653147 -12.54381180 4.17205238 0 0 60
-7.30575705 -12.54405212 4.16117525 0 0 60
-7.29698515 -12.54776955 4.16675997 0 0 61
-7.33014536 -12.54917717 4.15757799 0 0 62
-7.33878946 -12.55252457 4.15729189 0 0 61
-7.34761953 -12.55499744 4.15590858 0 0 59
-7.35730028 -12.55794239 4.15429354 0 0 59
-7.36613226 -12.56041718 4.15290880 0 0 60
-7.37666368 -12.56383514 4.15106201 0 0 60
-7.38288450 -12.56713104 4.15041113 0 0 61
-7.39086580 -12.56913280 4.14925861 0 0 61
-7.40184736 -12.57166862 4.14727736 0 0 61
-7.40591669 -12.57489967 4.14722061 0 0 60
-7.40626192 -12.57848644 4.14716434 0 0 58
-7.44117975 -12.57860470 4.13748074 0 0 57
-7.42522383 -12.58302689 4.14402819 0 0 58
-7.45753527 -12.58396339 4.13507700 0 0 57
-7.45814466 -12.58754158 4.13598680 0 0 56
-7.46737432 -12.59136868 4.13450718 0 0 56
-7.47234774 -12.59283447 4.13418007 0 0 56
-7.48288012 -12.59625626 4.13233614 0 0 56
-7.48668337 -12.59949493 4.13131571 0 0 56
-7.48990107 -12.60225487 4.13149118 0 0 56
-7.48333120 -12.60653687 4.13335848 0 0 56
-7.49646616 -12.60913658 4.13078308 0 0 56
-7.49250555 -12.61259842 4.13191891 0 0 56
-7.49675894 -12.61495972 4.13076353 0 0 56
-7.49750376 -12.61990166 4.13061142 0 0 56
-7.49313974 -12.62201118 4.13184404 0 0 56
-7.49675512 -12.62612534 4.13192272 0 0 56
-7.49194002 -12.62911415 4.13329077 0 0 57
-7.51967764 -12.62993622 4.12457037 0 0 57
-7.52204657 -12.63222313 4.12497663 0 0 57
-7.51723051 -12.63521576 4.12634373 0 0 57
-7.51967478 -12.64110184 4.12572908 0 0 58
-7.50462198 -12.64650154 4.12892342 0 0 59
-7.50717020 -12.64791679 4.12823153 0 0 59
-7.49727774 -12.65390968 4.13000345 0 0 60
-7.48685122 -12.65718651 4.13293123 0 0 61
-7.47615767 -12.66047478 4.13489389 0 0 60
-7.46711206 -12.66693974 4.13643599 0 0 61
-7.45902586 -12.66940880 4.13766718 0 0 60
-7.43984842 -12.67380905 4.14095831 0 0 60
-7.40005827 -12.68165684 4.14896297 0 0 59
-7.39870119 -12.68430519 4.14936876 0 0 59
-7.33853579 -12.69249249 4.16095591 0 0 58
-7.32496977 -12.69660950 4.16268587 0 0 58
-6.53106546 -12.43716526 4.29288244 0 0 58
-6.53235102 -12.43934822 4.29774141 0 0 57
-6.55702829 -12.44186974 4.28988600 0 0 56
-6.58708048 -12.44447517 4.28469038 0 0 57
-6.61197615 -12.44648361 4.28092289 0 0 58
-6.62987566 -12.44832611 4.27701807 0 0 58
-6.65758944 -12.45174026 4.27351809 0 0 57
-6.68652391 -12.45388412 4.26759195 0 0 58
-6.70019770 -12.45646095 4.26694202 0 0 58
-6.73586035 -12.45878220 4.26018763 0 0 59
-6.74213743 -12.45984077 4.25949955 0 0 60
-6.75985479 -12.46255302 4.25668955 0 0 61
-6.78815317 -12.46645164 4.25199747 0 0 60
-6.82131243 -12.46785736 4.24281454 0 0 58
-6.82232714 -12.47005081 4.24670839 0 0 58
-6.85633898 -12.47192955 4.23729515 0 0 57
-6.87620687 -12.47470284 4.23389244 0 0 56
-6.89325571 -12.47607803 4.23021603 0 0 56
-6.91469240 -12.47842979 4.22740793 0 0 55
-6.93783140 -12.48173141 4.22414017 0 0 56
-6.95442724 -12.48398399 4.22060251 0 0 56
-6.96998739 -12.48663330 4.21838951 0 0 56
-6.98881769 -12.48980904 4.21631527 0 0 56
-7.00370932 -12.49111843 4.21323538 0 0 56
-7.01626635 -12.49323463 4.21185446 0 0 57
-7.03482866 -12.49641991 4.20881701 0 0 58
-7.05012083 -12.49907780 4.20564032 0 0 58
-7.05764627 -12.50196362 4.20462227 0 0 59
-7.08780527 -12.50283813 4.19626760 0 0 57
-7.10506487 -12.50643253 4.19359589 0 0 57
-7.10320520 -12.50945377 4.19725704 0 0 56
-7.13897562 -12.51004410 4.18734217 0 0 55
-7.15538263 -12.51316547 4.18490076 0 0 55
-7.17094088 -12.51581764 4.18269110 0 0 55
-7.17873621 -12.51869202 4.18263388 0 0 54
-7.19317770 -12.52087879 4.17969275 0 0 55
-7.20415926 -12.52341843 4.17771006 0 0 54
-7.21541452 -12.52594185 4.17669344 0 0 54
-7.23285818 -12.52866650 4.17292213 0 0 55
-7.24626207 -12.53125572 4.17130804 0 0 56
-7.25594664 -12.53420067 4.16969299 0 0 56
-7.26607656 -12.53626728 4.16794252 0 0 57
-7.27732515 -12.53879166 4.16692591 0 0 57
-7.28831339 -12.54132843 4.16494799 0 0 58
-7.32578039 -12.54286194 4.15457010 0 0 59
-7.31700945 -12.54657745 4.16015577 0 0 62
-7.34774923 -12.54793549 4.15060949 0 0 63
-7.36070204 -12.55140305 4.14912939 0 0 63
-7.37155390 -12.55257607 4.14820719 0 0 61
-7.37862825 -12.55634212 4.14732504 0 0 60
-7.38530207 -12.55875206 4.14653683 0 0 60
-7.39713907 -12.56176567 4.14432478 0 0 60
-7.40336084 -12.56505585 4.14367151 0 0 60
-7.40873480 -12.56787872 4.14325047 0 0 61
-7.41945028 -12.57042313 4.14030409 0 0 60
-7.42594004 -12.57370758 4.14061785 0 0 60
-7.43059397 -12.57742214 4.13936567 0 0 57
-7.46726561 -12.57624626 4.12918329 0 0 56
-7.44740057 -12.58189774 4.13682890 0 0 57
-7.48447275 -12.58207607 4.12654877 0 0 56
-7.48508596 -12.58565331 4.12745714 0 0 56
-7.49476671 -12.58860207 4.12584114 0 0 56
-7.49928904 -12.59095001 4.12565041 0 0 56
-7.50766516 -12.59430695 4.12440157 0 0 56
-7.51362085 -12.59761047 4.12278605 0 0 56
-7.51768923 -12.60084057 4.12272978 0 0 56
-7.51202440 -12.60336018 4.12432909 0 0 56
-7.52385759 -12.60636902 4.12211752 0 0 56
-7.51944113 -12.61071396 4.12338877 0 0 56
-7.52584982 -12.61313629 4.12163782 0 0 56
-7.52574205 -12.61760712 4.12171507 0 0 56
-7.52380228 -12.61977005 4.12331724 0 0 56
-7.52630281 -12.62342072 4.12266159 0 0 56
-7.52364302 -12.62647629 4.12343311 0 0 57
-7.55294847 -12.62687683 4.11530876 0 0 56
-7.55746889 -12.62922668 4.11511803 0 0 56
-7.55135393 -12.63262558 4.11685276 0 0 56
-7.55855703 -12.63775635 4.11490774 0 0 56
-7.54350138 -12.64315224 4.11810541 0 0 57
-7.54847383 -12.64462090 4.11778021 0 0 58
-7.53427076 -12.65049171 4.12074375 0 0 59
-7.52097368 -12.65459824 4.12344122 0 0 60
-7.51243353 -12.65794754 4.12480593 0 0 60
-7.50684500 -12.66406250 4.12538671 0 0 60
-7.50163317 -12.66570282 4.12684584 0 0 60
-7.48748350 -12.66933632 4.12977362 0 0 60
-7.45833063 -12.67613602 4.13585711 0 0 59
-7.45886087 -12.67885208 4.13470268 0 0 59
-7.41476107 -12.68657684 4.14390278 0 0 59
-7.40061235 -12.69021225 4.14682722 0 0 59
-7.36198854 -12.69902229 4.15244722 0 0 58
-7.35488558 -12.70332718 4.15238762 0 0 59
-6.53026533 -12.43719673 4.28999376 0 0 58
-6.53585482 -12.43950462 4.29365396 0 0 57
-6.56830072 -12.44180489 4.28364611 0 0 56
-6.59750223 -12.44393921 4.27868414 0 0 56
-6.62239695 -12.44594574 4.27491426 0 0 57
-6.64141130 -12.44824791 4.27174091 0 0 57
-6.67088366 -12.45036983 4.26773977 0 0 57
-6.69824934 -12.45293427 4.26121569 0 0 58
-6.71519327 -12.45603848 4.26070261 0 0 59
-6.74870443 -12.45829487 4.25454664 0 0 62
-6.75471544 -12.45936489 4.25289011 0 0 61
-6.77269411 -12.46206665 4.25104761 0 0 61
-6.80229616 -12.46555519 4.24598742 0 0 59
-6.83545923 -12.46696281 4.23680639 0 0 58
-6.83620501 -12.46916389 4.23973846 0 0 58
-6.86891508 -12.47145462 4.23069048 0 0 57
-6.89165640 -12.47339821 4.22751856 0 0 56
-6.90740061 -12.47518158 4.22420454 0 0 56
-6.92884016 -12.47753716 4.22140074 0 0 56
-6.95171213 -12.48084450 4.21717024 0 0 57
-6.96987486 -12.48267746 4.21422672 0 0 57
-6.98673964 -12.48492050 4.21165133 0 0 57
-7.00556898 -12.48809433 4.20957422 0 0 57
-7.01915979 -12.48981094 4.20686293 0 0 58
-7.03041124 -12.49233818 4.20584583 0 0 58
-7.04825544 -12.49641228 4.20197725 0 0 58
-7.06557035 -12.49777317 4.19926548 0 0 58
-7.07524824 -12.50072098 4.19764948 0 0 58
-7.10410166 -12.50200462 4.18966198 0 0 56
-7.12051249 -12.50512791 4.18722105 0 0 56
-7.12022638 -12.50773048 4.19147825 0 0 55
-7.15639162 -12.50967312 4.18147039 0 0 55
-7.17168379 -12.51233292 4.17829657 0 0 55
-7.18854666 -12.51457405 4.17571926 0 0 55
-7.19764280 -12.51703644 4.17529821 0 0 55
-7.21208429 -12.51922703 4.17235518 0 0 54
-7.22549009 -12.52181625 4.17074108 0 0 54
-7.23777723 -12.52394295 4.16839361 0 0 54
-7.25288248 -12.52747631 4.16631699 0 0 55
-7.26516867 -12.52960300 4.16397142 0 0 55
-7.27597094 -12.53301239 4.16309023 0 0 55
-7.28695250 -12.53554916 4.16110945 0 0 56
-7.29923773 -12.53767586 4.15876293 0 0 57
-7.31049013 -12.54020023 4.15774393 0 0 57
-7.34711027 -12.54125977 4.14759970 0 0 58
-7.33546400 -12.54580784 4.15295362 0 0 62
-7.36777449 -12.54674625 4.14400434 0 0 62
-7.37902403 -12.54926872 4.14298725 0 0 64
-7.38870573 -12.55221558 4.14137173 0 0 63
-7.39753199 -12.55468845 4.13998890 0 0 61
-7.40506029 -12.55757427 4.13896704 0 0 60
-7.41604376 -12.56011009 4.13698816 0 0 60
-7.42599440 -12.56304741 4.13633776 0 0 59
-7.43109751 -12.56587982 4.13495207 0 0 59
-7.44319963 -12.56887627 4.13370371 0 0 58
-7.44614840 -12.57164574 4.13291311 0 0 59
-7.45609808 -12.57458019 4.13226271 0 0 57
-7.49205160 -12.57429886 4.12125015 0 0 57
-7.47349119 -12.57953835 4.12853050 0 0 56
-7.51037645 -12.58058929 4.11935091 0 0 56
-7.51013708 -12.58369637 4.12048674 0 0 56
-7.52040148 -12.58712482 4.11767769 0 0 56
-7.52622652 -12.58906555 4.11712265 0 0 57
-7.53375101 -12.59194756 4.11610270 0 0 57
-7.54082727 -12.59571457 4.11522102 0 0 56
-7.54638433 -12.59766388 4.11369944 0 0 56
-7.54223394 -12.60199833 4.11593580 0 0 56
-7.55321741 -12.60453606 4.11395407 0 0 56
-7.55055666 -12.60758972 4.11472368 0 0 56
-7.55866766 -12.61095524 4.11251497 0 0 56
-7.55555487 -12.61489105 4.11341715 0 0 56
-7.55361700 -12.61705494 4.11501503 0 0 56
-7.56068850 -12.62082005 4.11413193 0 0 56
-7.55803061 -12.62387276 4.11490679 0 0 56
-7.58863974 -12.62386513 4.10641479 0 0 56
-7.59374285 -12.62669945 4.10503149 0 0 56
-7.58919668 -12.62967873 4.10736132 0 0 56
-7.59855604 -12.63487053 4.10482264 0 0 57
-7.58395338 -12.63938618 4.10788345 0 0 57
-7.58820581 -12.64174652 4.10673046 0 0 58
-7.57687521 -12.64678574 4.10992622 0 0 58
-7.56272554 -12.65042019 4.11285114 0 0 58
-7.55373526 -12.65465164 4.11435366 0 0 58
-7.54945230 -12.66036034 4.11456537 0 0 59
-7.54423666 -12.66199970 4.11602879 0 0 59
-7.53309202 -12.66616821 4.11812639 0 0 59
-7.50915384 -12.67132568 4.12274885 0 0 59
-7.51080179 -12.67450619 4.12232542 0 0 59
-7.47231627 -12.68194294 4.12996626 0 0 60
-7.46162081 -12.68523026 4.13192987 0 0 60
-7.42802477 -12.69327641 4.13718319 0 0 60
-7.41158628 -12.69822121 4.13868141 0 0 59
-7.38184977 -12.70453739 4.14595938 0 0 59
-7.39105177 -12.70526791 4.14237833 0 0 60
-6.53722906 -12.43700600 4.28494549 0 0 59
-6.54497194 -12.43937492 4.28801584 0 0 56
-6.57943869 -12.44037437 4.27846575 0 0 56
-6.60903883 -12.44386292 4.27340555 0 0 56
-6.63393641 -12.44586849 4.26963568 0 0 56
-6.65183496 -12.44771194 4.26572943 0 0 56
-6.68215513 -12.45030689 4.26150179 0 0 58
-6.71024084 -12.45197773 4.25580263 0 0 58
-6.72934008 -12.45514107 4.25469351 0 0 60
-6.75827551 -12.45728493 4.24876833 0 0 64
-6.76625395 -12.45928955 4.24761534 0 0 63
-6.78468752 -12.46110725 4.24563551 0 0 61
-6.81774473 -12.46424866 4.23961401 0 0 59
-6.84830046 -12.46647453 4.23116493 0 0 58
-6.84904909 -12.46867943 4.23409414 0 0 57
-6.88305998 -12.47055817 4.22468328 0 0 56
-6.90580225 -12.47250652 4.22150898 0 0 56
-6.92024183 -12.47469330 4.21856642 0 0 56
-6.94383383 -12.47711182 4.21516085 0 0 56
-6.96370173 -12.47988892 4.21175814 0 0 58
-6.98402166 -12.48178196 4.20821810 0 0 58
-7.00258493 -12.48496819 4.20517826 0 0 59
-7.01971674 -12.48719788 4.20356607 0 0 59
-7.03200102 -12.48932552 4.20121861 0 0 59
-7.04410219 -12.49232292 4.19997072 0 0 58
-7.06397104 -12.49510002 4.19656944 0 0 57
-7.07971525 -12.49688148 4.19325781 0 0 57
-7.08939695 -12.49982452 4.19164228 0 0 58
-7.12040377 -12.50117111 4.18305779 0 0 56
-7.13923502 -12.50434685 4.18098259 0 0 55
-7.13782835 -12.50648689 4.18450928 0 0 55
-7.17314386 -12.50795937 4.17472982 0 0 55
-7.18928766 -12.51109123 4.17132473 0 0 55
-7.20641661 -12.51331997 4.16971254 0 0 56
-7.21524668 -12.51579571 4.16832638 0 0 55
-7.23080492 -12.51844597 4.16611767 0 0 54
-7.24524736 -12.52063656 4.16317368 0 0 54
-7.25734758 -12.52363491 4.16192675 0 0 54
-7.27094030 -12.52535057 4.15921116 0 0 55
-7.28277159 -12.52835846 4.15700102 0 0 55
-7.29702806 -12.53141880 4.15515471 0 0 55
-7.30715990 -12.53348541 4.15340424 0 0 56
-7.31926298 -12.53648472 4.15215826 0 0 57
-7.33109713 -12.53948975 4.14994478 0 0 57
-7.36843824 -12.53965950 4.14063120 0 0 58
-7.35593748 -12.54373360 4.14621639 0 0 60
-7.38609552 -12.54460907 4.13786364 0 0 60
-7.39402056 -12.54884529 4.13674831 0 0 62
-7.40415239 -12.55090809 4.13499880 0 0 63
-7.41670752 -12.55302715 4.13361549 0 0 61
-7.42899466 -12.55515289 4.13126898 0 0 59
-7.43952608 -12.55857277 4.12942076 0 0 59
-7.45032358 -12.56197929 4.12853956 0 0 58
-7.45700026 -12.56439018 4.12775183 0 0 58
-7.46883345 -12.56739998 4.12553835 0 0 58
-7.47093725 -12.56969833 4.12498283 0 0 58
-7.48042822 -12.57351398 4.12446642 0 0 57
-7.51449537 -12.57315826 4.11501312 0 0 57
-7.49939203 -12.57805347 4.12132978 0 0 56
-7.53300810 -12.57857990 4.11201382 0 0 57
-7.53361750 -12.58215904 4.11292315 0 0 57
-7.54545450 -12.58516693 4.11071062 0 0 57
-7.55212831 -12.58757782 4.10992050 0 0 57
-7.56095934 -12.59005165 4.10853815 0 0 57
-7.56821680 -12.59294701 4.10655546 0 0 57
-7.57574511 -12.59582901 4.10553789 0 0 56
-7.57335138 -12.59887505 4.10727262 0 0 56
-7.58191156 -12.60135937 4.10492420 0 0 57
-7.58207178 -12.60581970 4.10596657 0 0 57
-7.59193659 -12.60789490 4.10325098 0 0 57
-7.58967733 -12.61230087 4.10392618 0 0 56
-7.58773661 -12.61446285 4.10552692 0 0 56
-7.59499598 -12.61735725 4.10354471 0 0 57
-7.59214926 -12.62128353 4.10541439 0 0 57
-7.62145472 -12.62168407 4.09728909 0 0 57
-7.62813139 -12.62409592 4.09650135 0 0 57
-7.62350130 -12.62621975 4.09677172 0 0 56
-7.63182592 -12.63180733 4.09556293 0 0 57
-7.61807299 -12.63679504 4.09839296 0 0 58
-7.62147665 -12.63868332 4.09746933 0 0 58
-7.61360598 -12.64337730 4.09970284 0 0 58
-7.60618258 -12.64718628 4.10180187 0 0 57
-7.60064745 -12.65106964 4.10234165 0 0 58
-7.59923697 -12.65595055 4.10278463 0 0 58
-7.59245348 -12.65800858 4.10365152 0 0 58
-7.58176184 -12.66129684 4.10561419 0 0 58
-7.55979395 -12.66738701 4.11073637 0 0 58
-7.56274366 -12.67015839 4.10994768 0 0 58
-7.52712965 -12.67676735 4.11782122 0 0 59
-7.51616907 -12.68006516 4.11881971 0 0 59
-7.48584604 -12.68863392 4.12421036 0 0 60
-7.47501421 -12.69329834 4.12414885 0 0 59
-7.44097376 -12.69948578 4.13262081 0 0 59
-7.44299173 -12.70092106 4.13000059 0 0 60
-7.45070410 -12.70293522 4.12788391 0 0 59
-6.51409101 -12.43370533 4.28821182 0 0 57
-6.54679918 -12.43599510 4.27916765 0 0 60
-6.55539560 -12.43883610 4.28200388 0 0 57
-6.58855677 -12.44024372 4.27282000 0 0 57
-6.61946154 -12.44332123 4.26739502 0 0 56
-6.64480925 -12.44444752 4.26349401 0 0 56
-6.66382551 -12.44675064 4.26032114 0 0 56
-6.69284391 -12.44975853 4.25645447 0 0 58
-6.72223043 -12.45101929 4.25039244 0 0 59
-6.73975897 -12.45460320 4.24868488 0 0 62
-6.76765966 -12.45714474 4.24408674 0 0 64
-6.77712584 -12.45786858 4.24147177 0 0 63
-6.79641199 -12.46016312 4.23926115 0 0 60
-6.83031797 -12.46377087 4.23300791 0 0 59
-6.86002398 -12.46552658 4.22478914 0 0 58
-6.86234522 -12.46731186 4.22831678 0 0 57
-6.89720583 -12.46966076 4.21867180 0 0 57
-6.91968107 -12.47161865 4.21453667 0 0 56
-6.93569231 -12.47338963 4.21219110 0 0 56
-6.95843172 -12.47533417 4.20901728 0 0 57
-6.97784948 -12.47899342 4.20574760 0 0 57
-6.99731493 -12.48041439 4.20244074 0 0 59
-7.01503038 -12.48312569 4.19963264 0 0 61
-7.03143644 -12.48624897 4.19719362 0 0 61
-7.04372549 -12.48837852 4.19484377 0 0 60
-7.05713224 -12.49096584 4.19322968 0 0 58
-7.07941961 -12.49379349 4.19019270 0 0 57
-7.09601450 -12.49604607 4.18665266 0 0 56
-7.10484362 -12.49851990 4.18526697 0 0 57
-7.13742208 -12.49944592 4.17727947 0 0 56
-7.15598631 -12.50262833 4.17424250 0 0 55
-7.15628386 -12.50571632 4.17730713 0 0 55
-7.19074583 -12.50671387 4.16775799 0 0 55
-7.20715570 -12.50983715 4.16531849 0 0 55
-7.22186327 -12.51201534 4.16333628 0 0 56
-7.23181295 -12.51495171 4.16268539 0 0 55
-7.24840689 -12.51720428 4.15914631 0 0 55
-7.26226759 -12.51891041 4.15739775 0 0 55
-7.27410078 -12.52191925 4.15518522 0 0 54
-7.29096174 -12.52415943 4.15261078 0 0 54
-7.30279589 -12.52716827 4.15039539 0 0 55
-7.31835699 -12.52981949 4.14818525 0 0 55
-7.32803488 -12.53276634 4.14657164 0 0 56
-7.33974028 -12.53440857 4.14541960 0 0 57
-7.35157347 -12.53741837 4.14320517 0 0 57
-7.38604116 -12.53841782 4.13366079 0 0 59
-7.37484407 -12.54208374 4.13887787 0 0 60
-7.40454912 -12.54383850 4.13065815 0 0 58
-7.41207647 -12.54672241 4.12964153 0 0 59
-7.42332697 -12.54924583 4.12862253 0 0 60
-7.43646479 -12.55184650 4.12604666 0 0 60
-7.44901896 -12.55396080 4.12466335 0 0 60
-7.46215868 -12.55656242 4.12208414 0 0 59
-7.47295332 -12.55996704 4.12120104 0 0 59
-7.47962904 -12.56237984 4.12041616 0 0 59
-7.49146414 -12.56538963 4.11820412 0 0 58
-7.49553537 -12.56862068 4.11814785 0 0 58
-7.50436449 -12.57109547 4.11676216 0 0 57
-7.53685999 -12.57115936 4.10671377 0 0 58
-7.52417707 -12.57610416 4.11339855 0 0 56
-7.55694056 -12.57616043 4.10431099 0 0 57
-7.55840254 -12.58020973 4.10498953 0 0 57
-7.57023668 -12.58321667 4.10277796 0 0 58
-7.57736444 -12.58474922 4.10185480 0 0 58
-7.58659220 -12.58857536 4.10037613 0 0 58
-7.59254789 -12.59187984 4.09875822 0 0 57
-7.59967566 -12.59340858 4.09783411 0 0 57
-7.59813643 -12.59692669 4.09933949 0 0 57
-7.60755110 -12.59988403 4.09676170 0 0 58
-7.60685587 -12.60387039 4.09803247 0 0 58
-7.61698961 -12.60593605 4.09628344 0 0 59
-7.62164164 -12.60964775 4.09503412 0 0 58
-7.61970186 -12.61181068 4.09663105 0 0 57
-7.62435389 -12.61552429 4.09538174 0 0 59
-7.62281466 -12.61903954 4.09688520 0 0 58
-7.65342283 -12.61903095 4.08839798 0 0 59
-7.65924501 -12.62096977 4.08784008 0 0 58
-7.65501642 -12.62444496 4.08801174 0 0 57
-7.66379213 -12.62915516 4.08666897 0 0 58
-7.65219450 -12.63420677 4.08889914 0 0 58
-7.65716887 -12.63567448 4.08857632 0 0 58
-7.64988089 -12.64084816 4.08961678 0 0 58
-7.64618254 -12.64430141 4.09171534 0 0 58
-7.64110136 -12.64730358 4.09212065 0 0 58
-7.64314795 -12.65183544 4.09160280 0 0 59
-7.63748121 -12.65435791 4.09320021 0 0 58
-7.62894201 -12.65770721 4.09456587 0 0 58
-7.60827398 -12.66338730 4.09932232 0 0 58
-7.61338186 -12.66622066 4.09793520 0 0 58
-7.58468390 -12.67213440 4.10388517 0 0 58
-7.57529020 -12.67501068 4.10548162 0 0 58
-7.54600477 -12.68318272 4.10954285 0 0 58
-7.53890085 -12.68748856 4.10948277 0 0 58
-7.50485849 -12.69367599 4.11795425 0 0 59
-7.50902796 -12.69517517 4.11473799 0 0 59
-7.51916361 -12.69723892 4.11298704 0 0 58
-7.47022009 -12.70485878 4.12145472 0 0 58
-7.47644663 -12.70815277 4.12080193 0 0 57
-6.52132273 -12.43350410 4.28413200 0 0 58
-6.55461550 -12.43627548 4.27388906 0 0 61
-6.56523371 -12.43781471 4.27718687 0 0 58
-6.59597254 -12.43917084 4.26764059 0 0 58
-6.63014936 -12.44277287 4.26234961 0 0 57
-6.65634775 -12.44437313 4.25821590 0 0 56
-6.67424631 -12.44621468 4.25430965 0 0 57
-6.70371580 -12.44833660 4.25031042 0 0 59
-6.73265314 -12.45047951 4.24438715 0 0 60
-6.74959707 -12.45358276 4.24387121 0 0 62
-6.77853155 -12.45572472 4.23794222 0 0 62
-6.78781366 -12.45732117 4.23642492 0 0 62
-6.80709887 -12.45961189 4.23421431 0 0 60
-6.84100771 -12.46322250 4.22796202 0 0 59
-6.87201548 -12.46456909 4.21937513 0 0 57
-6.87648916 -12.46641541 4.22230816 0 0 57
-6.91050005 -12.46829605 4.21289587 0 0 57
-6.93252039 -12.47113037 4.20889378 0 0 56
-6.94983530 -12.47249222 4.20618200 0 0 57
-6.97100592 -12.47485733 4.20241404 0 0 58
-6.99329519 -12.47768593 4.19937372 0 0 58
-7.01100874 -12.48039913 4.19656706 0 0 59
-7.02571726 -12.48258018 4.19458723 0 0 60
-7.04297972 -12.48617268 4.19191408 0 0 60
-7.05571604 -12.48741913 4.18943357 0 0 59
-7.07154417 -12.49005890 4.18818521 0 0 57
-7.09441519 -12.49337006 4.18395615 0 0 56
-7.11146212 -12.49473953 4.18027544 0 0 56
-7.12140989 -12.49767494 4.17962694 0 0 56
-7.15372133 -12.49860954 4.17067766 0 0 55
-7.17098284 -12.50220680 4.16800213 0 0 55
-7.17330217 -12.50398827 4.17153120 0 0 55
-7.20834970 -12.50547028 4.16078901 0 0 55
-7.22345781 -12.50900078 4.15871191 0 0 55
-7.23816633 -12.51117992 4.15673351 0 0 56
-7.24941492 -12.51370811 4.15571451 0 0 55
-7.26497412 -12.51636124 4.15350533 0 0 55
-7.27856302 -12.51807594 4.15079260 0 0 55
-7.29327154 -12.52025414 4.14881277 0 0 55
-7.31183863 -12.52343941 4.14577246 0 0 55
-7.32412577 -12.52556801 4.14342499 0 0 55
-7.33622503 -12.52856445 4.14217901 0 0 56
-7.34851408 -12.53069305 4.13983059 0 0 56
-7.35949755 -12.53322887 4.13785028 0 0 57
-7.37159681 -12.53622818 4.13660240 0 0 58
-7.40233946 -12.53758430 4.12705469 0 0 58
-7.39271498 -12.54082966 4.13287067 0 0 58
-7.42587805 -12.54223633 4.12368727 0 0 56
-7.43425512 -12.54559040 4.12244034 0 0 57
-7.44550562 -12.54811668 4.12142229 0 0 58
-7.45563841 -12.55018234 4.11967182 0 0 59
-7.46577120 -12.55224705 4.11792374 0 0 59
-7.48087549 -12.55577946 4.11584806 0 0 60
-7.49271154 -12.55879021 4.11363602 0 0 60
-7.50069189 -12.56079102 4.11248112 0 0 60
-7.51252413 -12.56379890 4.11026907 0 0 58
-7.51659441 -12.56703091 4.11021519 0 0 58
-7.52569056 -12.56949425 4.10979366 0 0 58
-7.56164503 -12.56921196 4.09878111 0 0 58
-7.54765940 -12.57456970 4.10583162 0 0 57
-7.58257532 -12.57468224 4.09615135 0 0 58
-7.58318663 -12.57826233 4.09705687 0 0 58
-7.59286833 -12.58120728 4.09544134 0 0 60
-7.60084772 -12.58320999 4.09428692 0 0 60
-7.61137819 -12.58662987 4.09244061 0 0 59
-7.61675119 -12.58945084 4.09201860 0 0 58
-7.62427759 -12.59233379 4.09100151 0 0 58
-7.62292147 -12.59497643 4.09140730 0 0 58
-7.63520765 -12.59710503 4.08905935 0 0 59
-7.63164186 -12.60192299 4.09009933 0 0 59
-7.64047098 -12.60439587 4.08871508 0 0 61
-7.64773226 -12.60729218 4.08673382 0 0 60
-7.64709330 -12.60904121 4.08796835 0 0 60
-7.65044260 -12.61316490 4.08708382 0 0 61
-7.65150785 -12.61586189 4.08785582 0 0 60
-7.67820787 -12.61708260 4.08046341 0 0 61
-7.68618727 -12.61908722 4.07931137 0 0 60
-7.68352747 -12.62214279 4.08008003 0 0 59
-7.69203234 -12.62685966 4.07777166 0 0 59
-7.68415880 -12.63155365 4.08000803 0 0 59
-7.68913412 -12.63302040 4.07968092 0 0 59
-7.68557215 -12.63783836 4.08072233 0 0 59
-7.68048716 -12.64084053 4.08112526 0 0 59
-7.67652655 -12.64430428 4.08226013 0 0 60
-7.67942095 -12.64930725 4.08151197 0 0 60
-7.67550993 -12.65053749 4.08261108 0 0 60
-7.67024469 -12.65441132 4.08411360 0 0 59
-7.65388441 -12.66021633 4.08767605 0 0 59
-7.65944338 -12.66216850 4.08615637 0 0 59
-7.63662291 -12.66778564 4.09150791 0 0 58
-7.63154173 -12.67078876 4.09190989 0 0 58
-7.61361361 -12.67701817 4.09487772 0 0 57
-7.60624266 -12.68133163 4.09385347 0 0 57
-7.57219839 -12.68752098 4.10232306 0 0 58
-7.57879019 -12.68907166 4.09947538 0 0 58
-7.59238195 -12.69078827 4.09676123 0 0 57
-7.53325319 -12.69857788 4.10701942 0 0 57
-7.52753305 -12.70333385 4.10865736 0 0 57
-7.51063967 -12.70916367 4.11029291 0 0 56
-7.52827311 -12.71101665 4.10542059 0 0 56
-6.52455950 -12.43367100 4.27908373 0 0 59
-6.56314802 -12.43566322 4.26944017 0 0 61
-6.57349920 -12.43721581 4.27177620 0 0 60
-6.60509157 -12.43904305 4.26199532 0 0 59
-6.63841772 -12.44217300 4.25693893 0 0 57
-6.66591692 -12.44336224 4.25243711 0 0 57
-6.68408346 -12.44519424 4.24949694 0 0 57
-6.71310186 -12.44819736 4.24563169 0 0 59
-6.74176836 -12.45035172 4.23873949 0 0 60
-6.75786543 -12.45298004 4.23845625 0 0 62
-6.79007387 -12.45564842 4.23266554 0 0 60
-6.79850340 -12.45676994 4.23137903 0 0 61
-6.81778669 -12.45906353 4.22916746 0 0 60
-6.85299921 -12.46226692 4.22255182 0 0 58
-6.88400698 -12.46361065 4.21396589 0 0 57
-6.88848066 -12.46545792 4.21689606 0 0 58
-6.92249155 -12.46733665 4.20748281 0 0 57
-6.94581842 -12.46976280 4.20311594 0 0 57
-6.96267843 -12.47200584 4.20054007 0 0 57
-6.98169565 -12.47430992 4.19736719 0 0 58
-7.00698996 -12.47767162 4.19350195 0 0 59
-7.02430201 -12.47903252 4.19078970 0 0 59
-7.03986216 -12.48168182 4.18857908 0 0 59
-7.05712271 -12.48527718 4.18590593 0 0 59
-7.07071447 -12.48699570 4.18319464 0 0 57
-7.08699369 -12.48875427 4.18181181 0 0 57
-7.10856104 -12.49247456 4.17794752 0 0 56
-7.12561178 -12.49384499 4.17426872 0 0 56
-7.13686037 -12.49636936 4.17325163 0 0 56
-7.17002249 -12.49777794 4.16407108 0 0 55
-7.18773413 -12.50049019 4.16126490 0 0 55
-7.18829775 -12.50356483 4.16529274 0 0 55
-7.22491789 -12.50462532 4.15514708 0 0 56
-7.23890638 -12.50769806 4.15234089 0 0 56
-7.25361300 -12.50987625 4.15035868 0 0 56
-7.26571417 -12.51287365 4.14910936 0 0 55
-7.28172922 -12.51464462 4.14676380 0 0 55
-7.29616976 -12.51683426 4.14382076 0 0 55
-7.31172609 -12.51948547 4.14160967 0 0 55
-7.33204603 -12.52137756 4.13806963 0 0 56
-7.34329748 -12.52390385 4.13705254 0 0 56
-7.35513449 -12.52691078 4.13484287 0 0 56
-7.36611509 -12.52944946 4.13286066 0 0 57
-7.37651587 -12.53150177 4.13207245 0 0 57
-7.38834906 -12.53451061 4.12986326 0 0 58
-7.42020941 -12.53633022 4.12104654 0 0 57
-7.41116858 -12.54006004 4.12567091 0 0 57
-7.44720411 -12.54063606 4.11671877 0 0 56
-7.45473146 -12.54351997 4.11569977 0 0 56
-7.46571398 -12.54605389 4.11371946 0 0 57
-7.47566271 -12.54899216 4.11306810 0 0 57
-7.48534250 -12.55193710 4.11145306 0 0 58
-7.49762869 -12.55406570 4.10910654 0 0 59
-7.51103354 -12.55665112 4.10749245 0 0 60
-7.52071428 -12.55959988 4.10587788 0 0 61
-7.53627443 -12.56225109 4.10366583 0 0 59
-7.53837252 -12.56454945 4.10311174 0 0 58
-7.54832220 -12.56748390 4.10245848 0 0 58
-7.58297110 -12.56761169 4.09181118 0 0 60
-7.57159090 -12.57214832 4.09813023 0 0 58
-7.60520697 -12.57267475 4.08881330 0 0 60
-7.60712194 -12.57584190 4.08935213 0 0 61
-7.61549902 -12.57919502 4.08810663 0 0 62
-7.62217188 -12.58160877 4.08731747 0 0 62
-7.63531351 -12.58420753 4.08473921 0 0 60
-7.64283800 -12.58709335 4.08372068 0 0 60
-7.64879465 -12.59039497 4.08210373 0 0 59
-7.64770555 -12.59303093 4.08347416 0 0 60
-7.66084433 -12.59563160 4.08089733 0 0 61
-7.65799856 -12.59955597 4.08276463 0 0 59
-7.66440344 -12.60197735 4.08101416 0 0 61
-7.66905832 -12.60568810 4.07976389 0 0 62
-7.66927195 -12.60791588 4.08076572 0 0 61
-7.67307329 -12.61115456 4.07974672 0 0 62
-7.67498636 -12.61432362 4.08028889 0 0 61
-7.69953299 -12.61548328 4.07349253 0 0 61
-7.70881510 -12.61707878 4.07197523 0 0 60
-7.70746088 -12.61972046 4.07237959 0 0 59
-7.71708536 -12.62490082 4.07080221 0 0 59
-7.71136522 -12.62965775 4.07244062 0 0 59
-7.71607256 -12.63113403 4.07115126 0 0 59
-7.71381044 -12.63554192 4.07182741 0 0 59
-7.71011400 -12.63899422 4.07392645 0 0 60
-7.70719004 -12.64205933 4.07373333 0 0 60
-7.71053553 -12.64618492 4.07284880 0 0 60
-7.70747805 -12.64788437 4.07371664 0 0 60
-7.70436525 -12.65182114 4.07462358 0 0 60
-7.69218493 -12.65638828 4.07805204 0 0 59
-7.69728899 -12.65921879 4.07666492 0 0 59
-7.68268538 -12.66373730 4.07972574 0 0 59
-7.68002558 -12.66679001 4.08049488 0 0 59
-7.66901350 -12.67232132 4.08153677 0 0 58
-7.66491175 -12.67716122 4.08064985 0 0 58
-7.63850355 -12.68176460 4.08802271 0 0 58
-7.64613295 -12.68291664 4.08384657 0 0 58
-7.65927172 -12.68551445 4.08126593 0 0 58
-7.61104822 -12.69224262 4.09056234 0 0 57
-7.59945059 -12.69729233 4.09279633 0 0 57
-7.56760931 -12.70404625 4.09754848 0 0 57
-7.58393812 -12.70631123 4.09304667 0 0 57
-7.53800726 -12.71172523 4.10376644 0 0 56
-6.52937078 -12.43341637 4.27463293 0 0 60
-6.57056475 -12.43459320 4.26425886 0 0 62
-6.58046389 -12.43702316 4.26672840 0 0 61
-6.61447477 -12.43890381 4.25731468 0 0 60
-6.64668512 -12.44157028 4.25152254 0 0 58
-6.67445326 -12.44274998 4.24798870 0 0 57
-6.69234991 -12.44459152 4.24408102 0 0 58
-6.72267199 -12.44718742 4.23985243 0 0 59
-6.75030565 -12.44974136 4.23429298 0 0 60
-6.76828623 -12.45244122 4.23244667 0 0 61
-6.80049372 -12.45511150 4.22665691 0 0 59
-6.80892324 -12.45623207 4.22536993 0 0 59
-6.82951117 -12.45811462 4.22279453 0 0 59
-6.86427355 -12.46219826 4.21631098 0 0 58
-6.89527941 -12.46354389 4.20772552 0 0 57
-6.89975119 -12.46539116 4.21065712 0 0 58
-6.93533182 -12.46685028 4.20184088 0 0 57
-6.95735788 -12.46968937 4.19783878 0 0 57
-6.97336626 -12.47145653 4.19549370 0 0 57
-6.99453688 -12.47382355 4.19172335 0 0 58
-7.01812983 -12.47624016 4.18832064 0 0 59
-7.03602743 -12.47808361 4.18441296 0 0 59
-7.05531073 -12.48037529 4.18220520 0 0 58
-7.07257223 -12.48397064 4.17953062 0 0 58
-7.08616114 -12.48569107 4.17682028 0 0 57
-7.09956789 -12.48827839 4.17520571 0 0 56
-7.12401056 -12.49116707 4.17157173 0 0 55
-7.14087248 -12.49341011 4.16899490 0 0 55
-7.15185785 -12.49594688 4.16701365 0 0 55
-7.18547106 -12.49647141 4.15769672 0 0 55
-7.20403433 -12.49965763 4.15465784 0 0 55
-7.20459795 -12.50273418 4.15868616 0 0 56
-7.23906088 -12.50373077 4.14913988 0 0 56
-7.25435495 -12.50639153 4.14596319 0 0 56
-7.26991510 -12.50904274 4.14375305 0 0 56
-7.28228235 -12.51203346 4.14346886 0 0 55
-7.29933023 -12.51339912 4.13979101 0 0 56
-7.31488848 -12.51605225 4.13758230 0 0 56
-7.32959700 -12.51823044 4.13560152 0 0 57
-7.34861231 -12.52053261 4.13242960 0 0 59
-7.36175203 -12.52313519 4.12985229 0 0 57
-7.37300444 -12.52566051 4.12883377 0 0 57
-7.38268137 -12.52860641 4.12721968 0 0 57
-7.39236212 -12.53155136 4.12560368 0 0 57
-7.40464926 -12.53367805 4.12325716 0 0 57
-7.43826056 -12.53420639 4.11394072 0 0 56
-7.43164682 -12.53798580 4.11892986 0 0 56
-7.46395445 -12.53892136 4.10997820 0 0 55
-7.47475481 -12.54232979 4.10909796 0 0 56
-7.48488569 -12.54439354 4.10734797 0 0 56
-7.49456739 -12.54733849 4.10573053 0 0 56
-7.50712061 -12.54945469 4.10434961 0 0 57
-7.51896048 -12.55246544 4.10213470 0 0 58
-7.52948904 -12.55588150 4.10029125 0 0 59
-7.53988886 -12.55793571 4.09950304 0 0 61
-7.55518007 -12.56059742 4.09632969 0 0 61
-7.56185579 -12.56300926 4.09554005 0 0 59
-7.57023478 -12.56636620 4.09429407 0 0 59
-7.60214663 -12.56594563 4.08543921 0 0 61
-7.59377050 -12.57101822 4.09092855 0 0 59
-7.62392664 -12.57188988 4.08257341 0 0 61
-7.62584448 -12.57505894 4.08311462 0 0 63
-7.63682508 -12.57759762 4.08113527 0 0 63
-7.64349985 -12.58000755 4.08034754 0 0 62
-7.65664053 -12.58260918 4.07776976 0 0 61
-7.66416693 -12.58549309 4.07675123 0 0 62
-7.67169142 -12.58837509 4.07573318 0 0 61
-7.66903257 -12.59142971 4.07650423 0 0 61
-7.68001509 -12.59396744 4.07452345 0 0 62
-7.68062735 -12.59754181 4.07542992 0 0 60
-7.68573141 -12.60037613 4.07404327 0 0 60
-7.69065237 -12.60407925 4.07375860 0 0 61
-7.68974829 -12.60584068 4.07402897 0 0 61
-7.69682169 -12.60960960 4.07314301 0 0 60
-7.69631624 -12.61272240 4.07331848 0 0 61
-7.72347021 -12.61306477 4.06578970 0 0 59
-7.73275042 -12.61465549 4.06427336 0 0 58
-7.73120546 -12.61816978 4.06577730 0 0 58
-7.74402666 -12.62301826 4.06227303 0 0 58
-7.73830557 -12.62776947 4.06391287 0 0 58
-7.74327898 -12.62923717 4.06358528 0 0 58
-7.74146986 -12.63276577 4.06412554 0 0 58
-7.73880911 -12.63582039 4.06489658 0 0 59
-7.73569918 -12.63975525 4.06580496 0 0 60
-7.74120188 -12.64394093 4.06432152 0 0 60
-7.73899126 -12.64611244 4.06495810 0 0 60
-7.73633146 -12.64916801 4.06572914 0 0 59
-7.72630644 -12.65379906 4.06856012 0 0 59
-7.73186350 -12.65574741 4.06703997 0 0 59
-7.71811056 -12.66073608 4.06986904 0 0 59
-7.71720362 -12.66249847 4.07013845 0 0 59
-7.71246958 -12.66908932 4.07048941 0 0 59
-7.71254492 -12.67268753 4.06946754 0 0 59
-7.69390154 -12.67707062 4.07468510 0 0 58
-7.70179892 -12.67820930 4.07147264 0 0 58
-7.71623945 -12.68040085 4.06852341 0 0 59
-7.67708921 -12.68649673 4.07529926 0 0 58
-7.67267084 -12.69084167 4.07657194 0 0 57
-7.63867807 -12.69753265 4.08192158 0 0 58
-7.65258551 -12.69974327 4.07704926 0 0 58
-7.59255838 -12.70656109 4.09065628 0 0 57
-7.56183481 -12.71377468 4.09614229 0 0 56
-6.53548193 -12.43275356 4.26981783 0 0 60
-6.57752848 -12.43439865 4.25921202 0 0 62
-6.58872843 -12.43642426 4.26131582 0 0 61
-6.62274599 -12.43830299 4.25190306 0 0 60
-6.65521669 -12.44096088 4.24707651 0 0 58
-6.68272066 -12.44215012 4.24257708 0 0 58
-6.70147085 -12.44446468 4.23843622 0 0 58
-6.73205614 -12.44704819 4.23517275 0 0 59
-6.76072550 -12.44920349 4.22828436 0 0 59
-6.77897215 -12.45189095 4.22740221 0 0 60
-6.81032991 -12.45409012 4.22184324 0 0 58
-6.81876135 -12.45521259 4.22055340 0 0 58
-6.84019613 -12.45756721 4.21774626 0 0 58
-6.87541246 -12.46076870 4.21112967 0 0 57
-6.90641928 -12.46211338 4.20254278 0 0 57
-6.91174269 -12.46443367 4.20524406 0 0 57
-6.94790983 -12.46637344 4.19523382 0 0 57
-6.96934843 -12.46872997 4.19242811 0 0 58
-6.98424006 -12.47003651 4.18935156 0 0 57
-7.00711393 -12.47334862 4.18511724 0 0 58
-7.02966738 -12.47616577 4.18304348 0 0 58
-7.04756689 -12.47800827 4.17913914 0 0 58
-7.06788683 -12.47990227 4.17559814 0 0 59
-7.08671618 -12.48307514 4.17352438 0 0 58
-7.10030794 -12.48479271 4.17081070 0 0 57
-7.11416578 -12.48649979 4.16906214 0 0 56
-7.14031172 -12.49033451 4.16496468 0 0 55
-7.15631914 -12.49210453 4.16262102 0 0 55
-7.16645479 -12.49416924 4.16087151 0 0 55
-7.20046854 -12.49604988 4.15145540 0 0 55
-7.21818018 -12.49876308 4.14864969 0 0 55
-7.22004557 -12.50142670 4.15231228 0 0 56
-7.25320864 -12.50283623 4.14313126 0 0 56
-7.27007151 -12.50507545 4.14055252 0 0 56
-7.28562975 -12.50772667 4.13834429 0 0 56
-7.29903460 -12.51031494 4.13672876 0 0 55
-7.31589556 -12.51255608 4.13415146 0 0 56
-7.33248949 -12.51480675 4.13061333 0 0 57
-7.34419298 -12.51645279 4.12945986 0 0 58
-7.36190748 -12.51916504 4.12665033 0 0 61
-7.37719870 -12.52182770 4.12347698 0 0 59
-7.38799715 -12.52523613 4.12259340 0 0 58
-7.39813089 -12.52729988 4.12084436 0 0 57
-7.40996599 -12.53030872 4.11863375 0 0 57
-7.42251921 -12.53242588 4.11724997 0 0 56
-7.45568228 -12.53383350 4.10806561 0 0 55
-7.44879675 -12.53762341 4.11209440 0 0 55
-7.48352766 -12.53861141 4.10350895 0 0 55
-7.49450922 -12.54114819 4.10152864 0 0 55
-7.50275755 -12.54313850 4.10133886 0 0 56
-7.51328993 -12.54655647 4.09949446 0 0 56
-7.52799654 -12.54873371 4.09751272 0 0 56
-7.54158735 -12.55045509 4.09480143 0 0 57
-7.55211973 -12.55387020 4.09295511 0 0 59
-7.55991030 -12.55674648 4.09290123 0 0 60
-7.57435274 -12.55893517 4.08995724 0 0 61
-7.58318567 -12.56140900 4.08857298 0 0 61
-7.59182596 -12.56475449 4.08828592 0 0 60
-7.62132025 -12.56428528 4.07906389 0 0 61
-7.61267710 -12.56936455 4.08358908 0 0 60
-7.64283514 -12.57023621 4.07523775 0 0 61
-7.64474726 -12.57340622 4.07577848 0 0 63
-7.65658140 -12.57641602 4.07356739 0 0 64
-7.66398096 -12.57793427 4.07360554 0 0 63
-7.67666197 -12.58141422 4.07116365 0 0 62
-7.68307352 -12.58383751 4.06941414 0 0 63
-7.69086695 -12.58671093 4.06935835 0 0 61
-7.68820429 -12.58976460 4.07012844 0 0 61
-7.70003939 -12.59277439 4.06791925 0 0 60
-7.70038366 -12.59636497 4.06786299 0 0 59
-7.70836592 -12.59836578 4.06671000 0 0 59
-7.71301603 -12.60207939 4.06545830 0 0 59
-7.71192789 -12.60471153 4.06682730 0 0 59
-7.72160769 -12.60766029 4.06521130 0 0 58
-7.72006464 -12.61117554 4.06671619 0 0 58
-7.74825144 -12.61111355 4.05785894 0 0 57
-7.75753546 -12.61270618 4.05634165 0 0 57
-7.75729227 -12.61581421 4.05747938 0 0 57
-7.77168131 -12.62023735 4.05457163 0 0 56
-7.76596117 -12.62499428 4.05621099 0 0 57
-7.77067041 -12.62647152 4.05492067 0 0 57
-7.76925802 -12.63134956 4.05536604 0 0 57
-7.76816893 -12.63398552 4.05673313 0 0 58
-7.76550913 -12.63703918 4.05750513 0 0 59
-7.77101278 -12.64122391 4.05602312 0 0 59
-7.77010965 -12.64298820 4.05629396 0 0 59
-7.76874971 -12.64563370 4.05669928 0 0 59
-7.76042509 -12.65120888 4.05906820 0 0 58
-7.76728487 -12.65275002 4.05718088 0 0 58
-7.75250006 -12.65813637 4.06134272 0 0 59
-7.75244188 -12.66036987 4.06138134 0 0 59
-7.75031328 -12.66614056 4.06099606 0 0 59
-7.75514936 -12.66898346 4.05864859 0 0 59
-7.73951292 -12.67390060 4.06303883 0 0 59
-7.74741030 -12.67503929 4.05982304 0 0 59
-7.76230097 -12.67634773 4.05674648 0 0 60
-7.73118162 -12.68221092 4.06232643 0 0 59
-7.73179579 -12.68578911 4.06323385 0 0 58
-7.70125628 -12.69213390 4.06761980 0 0 58
-7.71516466 -12.69434357 4.06274605 0 0 58
-7.66016531 -12.70039558 4.07599258 0 0 58
-7.61076975 -12.70889664 4.08459568 0 0 57
-7.60433054 -12.71454239 4.08540249 0 0 57
-6.54159784 -12.43208981 4.26499939 0 0 60
-6.58364248 -12.43373680 4.25439548 0 0 62
-6.59569407 -12.43623352 4.25626802 0 0 62
-6.63015985 -12.43723106 4.24672079 0 0 61
-6.66348791 -12.44036102 4.24166441 0 0 59
-6.69053411 -12.44243145 4.23729753 0 0 58
-6.71130610 -12.44344330 4.23362303 0 0 59
-6.74117327 -12.44691849 4.22952843 0 0 60
-6.77056360 -12.44818497 4.22346926 0 0 60
-6.78854704 -12.45088387 4.22162342 0 0 60
-6.81944799 -12.45396042 4.21619749 0 0 57
-6.82787848 -12.45508289 4.21491194 0 0 57
-6.85192347 -12.45661736 4.21136999 0 0 57
-6.88610125 -12.46021843 4.20608473 0 0 57
-6.91840982 -12.46115780 4.19713354 0 0 57
-6.92458677 -12.46394730 4.19960022 0 0 57
-6.95990133 -12.46541214 4.18982220 0 0 57
-6.98107386 -12.46778107 4.18605185 0 0 58
-6.99708414 -12.46955109 4.18370581 0 0 57
-7.01982355 -12.47150040 4.18053532 0 0 57
-7.04269743 -12.47480774 4.17630243 0 0 57
-7.06086206 -12.47663879 4.17335844 0 0 58
-7.07987833 -12.47894287 4.17018652 0 0 58
-7.09870958 -12.48211765 4.16811085 0 0 58
-7.11315012 -12.48430634 4.16516733 0 0 57
-7.12942839 -12.48606682 4.16378546 0 0 56
-7.15275526 -12.48849487 4.15941954 0 0 55
-7.17046595 -12.49120808 4.15660954 0 0 55
-7.18145132 -12.49374199 4.15463018 0 0 55
-7.21461248 -12.49515152 4.14544821 0 0 55
-7.23017168 -12.49780273 4.14323950 0 0 56
-7.23419142 -12.50053024 4.14630413 0 0 56
-7.26735163 -12.50193977 4.13712263 0 0 56
-7.28506708 -12.50465202 4.13431501 0 0 56
-7.30062342 -12.50730324 4.13210344 0 0 56
-7.31533289 -12.50948334 4.13012266 0 0 55
-7.33219576 -12.51172447 4.12754726 0 0 57
-7.34793997 -12.51350212 4.12423801 0 0 58
-7.35919046 -12.51603031 4.12321997 0 0 59
-7.37560129 -12.51915264 4.12077856 0 0 61
-7.39004183 -12.52134323 4.11783457 0 0 59
-7.40214491 -12.52434063 4.11658907 0 0 58
-7.41443110 -12.52646637 4.11424065 0 0 56
-7.42828703 -12.52817249 4.11249256 0 0 56
-7.44012308 -12.53118324 4.11027813 0 0 55
-7.47615767 -12.53175831 4.10132885 0 0 54
-7.46711779 -12.53548908 4.10595179 0 0 54
-7.50158262 -12.53648758 4.09640503 0 0 55
-7.51238108 -12.53989410 4.09552145 0 0 55
-7.52251291 -12.54195786 4.09377098 0 0 55
-7.53376532 -12.54448318 4.09275579 0 0 55
-7.54690313 -12.54708290 4.09017563 0 0 56
-7.56246138 -12.54973412 4.08796549 0 0 57
-7.57344675 -12.55227184 4.08598280 0 0 59
-7.58097029 -12.55515575 4.08496714 0 0 60
-7.59352636 -12.55727005 4.08358431 0 0 61
-7.60105276 -12.56015491 4.08256578 0 0 62
-7.61073351 -12.56310081 4.08095074 0 0 61
-7.64134455 -12.56309128 4.07245970 0 0 62
-7.63270044 -12.56817627 4.07698822 0 0 60
-7.66546392 -12.56822681 4.06790161 0 0 61
-7.66607523 -12.57180500 4.06880903 0 0 63
-7.67660666 -12.57522583 4.06696177 0 0 64
-7.68373728 -12.57675552 4.06603861 0 0 63
-7.69471979 -12.57929230 4.06405783 0 0 61
-7.70179319 -12.58305740 4.06317520 0 0 61
-7.70977259 -12.58506012 4.06202221 0 0 60
-7.71038294 -12.58863831 4.06292820 0 0 59
-7.72397470 -12.59035492 4.06021738 0 0 58
-7.72543669 -12.59440517 4.06089354 0 0 57
-7.73314905 -12.59641838 4.05877733 0 0 57
-7.73807096 -12.60012054 4.05848885 0 0 57
-7.73716497 -12.60188103 4.05875969 0 0 57
-7.74769545 -12.60530090 4.05691385 0 0 57
-7.74700403 -12.60928917 4.05818701 0 0 57
-7.77460718 -12.60874748 4.05052328 0 0 56
-7.78343821 -12.61122131 4.04914188 0 0 55
-7.78338194 -12.61345291 4.04917812 0 0 55
-7.79862070 -12.61834908 4.04604197 0 0 56
-7.79420328 -12.62269783 4.04731655 0 0 56
-7.79917955 -12.62416744 4.04698849 0 0 56
-7.79822302 -12.62816525 4.04729843 0 0 57
-7.79798269 -12.63127136 4.04843855 0 0 57
-7.79590464 -12.63480759 4.04801273 0 0 58
-7.80167437 -12.63898373 4.04749584 0 0 57
-7.79991961 -12.64027405 4.04799795 0 0 57
-7.79941416 -12.64339066 4.04817104 0 0 58
-7.79153967 -12.64808178 4.05040598 0 0 58
-7.79925203 -12.65009594 4.04828787 0 0 57
-7.78707170 -12.65466404 4.05171633 0 0 58
-7.78701639 -12.65689850 4.05175638 0 0 58
-7.78488779 -12.66267109 4.05136919 0 0 59
-7.78972197 -12.66551208 4.04902267 0 0 59
-7.77780771 -12.67007065 4.05341291 0 0 59
-7.78440332 -12.67162037 4.05056334 0 0 59
-7.79844809 -12.67245674 4.04771471 0 0 59
-7.77450705 -12.67761517 4.05233812 0 0 59
-7.77785540 -12.68173599 4.05144835 0 0 59
-7.75880957 -12.68750191 4.05368376 0 0 59
-7.77213335 -12.68922997 4.05000734 0 0 58
-7.72144175 -12.69540215 4.06205606 0 0 58
-7.67635584 -12.70402908 4.06946564 0 0 58
-7.65542173 -12.70972443 4.07325745 0 0 58
-7.61895704 -12.71586037 4.08135986 0 0 57
-7.64376974 -12.71700764 4.07552862 0 0 57
-6.52523756 -12.42947006 4.26432276 0 0 60
-6.54725695 -12.43230915 4.26032209 0 0 60
-6.58930159 -12.43395615 4.24971628 0 0 62
-6.60292387 -12.43602943 4.25218725 0 0 62
-6.63666964 -12.43792057 4.24180651 0 0 61
-6.67175150 -12.43975735 4.23625088 0 0 60
-6.69880342 -12.44182777 4.23188448 0 0 59
-6.71911860 -12.44372177 4.22834539 0 0 59
-6.74944162 -12.44631767 4.22411537 0 0 61
-6.77883005 -12.44758224 4.21805429 0 0 60
-6.79792833 -12.45074558 4.21694183 0 0 59
-6.83144045 -12.45300388 4.21078634 0 0 56
-6.83987093 -12.45412254 4.20949888 0 0 56
-6.86261129 -12.45606804 4.20632601 0 0 56
-6.89782572 -12.45927238 4.19970655 0 0 57
-6.92968416 -12.46109104 4.19089079 0 0 57
-6.93545961 -12.46252632 4.19345665 0 0 57
-6.96928644 -12.46527672 4.18514299 0 0 57
-6.99175978 -12.46723557 4.18100739 0 0 58
-7.00992441 -12.46906471 4.17806578 0 0 57
-7.03239870 -12.47101974 4.17392874 0 0 57
-7.05553961 -12.47432327 4.17066145 0 0 57
-7.07500792 -12.47574139 4.16735125 0 0 57
-7.09271955 -12.47845840 4.16454649 0 0 57
-7.11070108 -12.48116016 4.16270018 0 0 58
-7.12644720 -12.48293877 4.15939188 0 0 57
-7.14357424 -12.48516941 4.15777683 0 0 56
-7.16559458 -12.48800850 4.15377951 0 0 55
-7.18461275 -12.49031258 4.15060377 0 0 55
-7.19689989 -12.49243927 4.14825583 0 0 55
-7.22875738 -12.49425697 4.13944149 0 0 56
-7.24516726 -12.49737930 4.13699961 0 0 56
-7.24963903 -12.49922657 4.13992786 0 0 56
-7.28280210 -12.50063419 4.13074827 0 0 55
-7.30182028 -12.50293541 4.12757158 0 0 56
-7.31522322 -12.50552559 4.12595987 0 0 56
-7.33078146 -12.50817680 4.12374830 0 0 56
-7.34679365 -12.50994301 4.12140322 0 0 57
-7.36235094 -12.51259613 4.11919117 0 0 59
-7.37333536 -12.51513100 4.11721134 0 0 59
-7.39019918 -12.51737404 4.11463213 0 0 59
-7.40333891 -12.51997471 4.11205721 0 0 58
-7.41889715 -12.52262497 4.10984564 0 0 57
-7.43229914 -12.52521324 4.10823298 0 0 56
-7.44458818 -12.52733994 4.10588455 0 0 56
-7.45799494 -12.52992821 4.10426903 0 0 55
-7.49506521 -12.53010750 4.09399271 0 0 55
-7.48799372 -12.53476906 4.09911728 0 0 54
-7.51945543 -12.53523254 4.09039593 0 0 55
-7.53155470 -12.53823090 4.08914757 0 0 55
-7.54384089 -12.54035759 4.08680058 0 0 55
-7.55594492 -12.54335594 4.08555365 0 0 56
-7.56607676 -12.54542065 4.08380365 0 0 56
-7.58163500 -12.54807281 4.08159161 0 0 58
-7.59216833 -12.55148983 4.07974386 0 0 60
-7.60099840 -12.55396271 4.07836103 0 0 61
-7.61112738 -12.55602837 4.07661390 0 0 61
-7.61865664 -12.55891037 4.07559443 0 0 62
-7.62860441 -12.56184769 4.07494307 0 0 61
-7.66109991 -12.56191063 4.06489420 0 0 62
-7.65448141 -12.56569099 4.06988096 0 0 61
-7.68679190 -12.56662750 4.06093121 0 0 63
-7.68655157 -12.56973457 4.06207037 0 0 63
-7.69578218 -12.57356262 4.06058836 0 0 63
-7.70290995 -12.57509232 4.05966616 0 0 61
-7.71474314 -12.57810211 4.05745506 0 0 59
-7.72312021 -12.58145714 4.05620527 0 0 59
-7.73109865 -12.58345699 4.05505419 0 0 59
-7.73301268 -12.58662605 4.05559254 0 0 58
-7.74875689 -12.58840752 4.05228424 0 0 57
-7.75152445 -12.59204674 4.05259562 0 0 57
-7.75819826 -12.59446144 4.05180645 0 0 56
-7.76500559 -12.59823608 4.04996157 0 0 56
-7.76437044 -12.59998703 4.05119419 0 0 56
-7.77359724 -12.60381508 4.04971504 0 0 56
-7.77466059 -12.60650921 4.05048418 0 0 55
-7.80024195 -12.60727119 4.04236078 0 0 55
-7.81082773 -12.60845184 4.04047728 0 0 55
-7.81058931 -12.61155891 4.04161310 0 0 55
-7.82713270 -12.61604691 4.03811121 0 0 55
-7.82401896 -12.61997986 4.03901529 0 0 56
-7.82984400 -12.62192154 4.03846264 0 0 56
-7.82803297 -12.62544823 4.03899860 0 0 56
-7.82707262 -12.62944794 4.03931046 0 0 57
-7.82616949 -12.63121128 4.03958082 0 0 57
-7.83494425 -12.63591957 4.03823566 0 0 56
-7.83318949 -12.63720989 4.03873730 0 0 56
-7.82922602 -12.64067459 4.03987408 0 0 57
-7.82220411 -12.64583969 4.04187441 0 0 57
-7.83364058 -12.64749432 4.03976011 0 0 56
-7.82204294 -12.65254402 4.04199457 0 0 57
-7.82243967 -12.65389824 4.04189825 0 0 57
-7.82057714 -12.65965939 4.04247952 0 0 58
-7.82384348 -12.66292095 4.03953362 0 0 58
-7.81193113 -12.66748047 4.04392195 0 0 58
-7.81982660 -12.66862202 4.04070520 0 0 58
-7.83471823 -12.66992760 4.03762817 0 0 58
-7.81338739 -12.67426682 4.04151678 0 0 59
-7.81830931 -12.67797089 4.04122925 0 0 59
-7.80729532 -12.68350410 4.04226732 0 0 59
-7.82277060 -12.68529320 4.03799486 0 0 58
-7.77814436 -12.69029999 4.04835272 0 0 58
-7.74180937 -12.69780159 4.05539417 0 0 58
-7.71715212 -12.70385075 4.05918694 0 0 58
-7.66286802 -12.71174812 4.07017756 0 0 58
-7.68376780 -12.71412182 4.06544161 0 0 58
-7.67985392 -12.71808720 4.06345701 0 0 56
-7.69416380 -12.71891403 4.06157160 0 0 56
-6.52461863 -12.42863083 4.26033068 0 0 61
-6.55337000 -12.43164444 4.25550318 0 0 60
-6.59541368 -12.43329144 4.24489737 0 0 61
-6.60903883 -12.43536663 4.24737024 0 0 62
-6.64435244 -12.43683624 4.23759031 0 0 61
-6.67871714 -12.43956661 4.23120356 0 0 61
-6.70733404 -12.44121838 4.22743750 0 0 60
-6.72738695 -12.44312382 4.22293425 0 0 60
-6.75797510 -12.44570541 4.21966696 0 0 61
-6.78664446 -12.44786263 4.21277523 0 0 61
-6.80704546 -12.45061684 4.21129942 0 0 59
-6.84055758 -12.45287514 4.20514345 0 0 56
-6.85029078 -12.45358658 4.20348978 0 0 56
-6.87329912 -12.45552063 4.20128012 0 0 56
-6.90936613 -12.45919609 4.19443178 0 0 57
-6.93952036 -12.46006966 4.18607569 0 0 58
-6.94614649 -12.46197605 4.18841028 0 0 57
-6.97970724 -12.46474075 4.17913485 0 0 57
-7.00244951 -12.46668434 4.17595911 0 0 58
-7.02164888 -12.46811676 4.17168951 0 0 58
-7.04439020 -12.47006416 4.16851568 0 0 58
-7.06753016 -12.47336197 4.16524839 0 0 57
-7.08654642 -12.47566414 4.16207600 0 0 58
-7.10471201 -12.47749805 4.15913248 0 0 57
-7.12354326 -12.48067284 4.15705633 0 0 57
-7.13928843 -12.48245430 4.15374947 0 0 57
-7.15772200 -12.48427582 4.15176868 0 0 56
-7.17974138 -12.48711109 4.14776659 0 0 56
-7.19790792 -12.48894215 4.14482641 0 0 56
-7.21104288 -12.49154186 4.14224768 0 0 56
-7.24205256 -12.49289036 4.13366127 0 0 56
-7.26088285 -12.49606323 4.13158941 0 0 56
-7.26378298 -12.49832916 4.13392210 0 0 56
-7.29910231 -12.49979973 4.12414122 0 0 55
-7.31681490 -12.50251389 4.12133408 0 0 56
-7.33022070 -12.50510216 4.11972094 0 0 56
-7.34649801 -12.50686169 4.11834002 0 0 56
-7.36094236 -12.50905037 4.11539459 0 0 58
-7.37564898 -12.51122856 4.11341333 0 0 59
-7.38878775 -12.51382828 4.11083555 0 0 58
-7.40519476 -12.51695061 4.10839462 0 0 58
-7.41990328 -12.51912975 4.10641575 0 0 57
-7.43676424 -12.52136993 4.10383749 0 0 56
-7.44774771 -12.52390671 4.10185575 0 0 56
-7.46088648 -12.52650452 4.09928036 0 0 56
-7.47690058 -12.52827644 4.09693480 0 0 55
-7.51032877 -12.52967072 4.08871603 0 0 55
-7.50604677 -12.53264427 4.09201193 0 0 55
-7.53705645 -12.53398895 4.08342600 0 0 55
-7.55131197 -12.53705025 4.08158064 0 0 55
-7.56256247 -12.53957462 4.08056307 0 0 56
-7.57399797 -12.54122829 4.07844877 0 0 57
-7.58367777 -12.54417801 4.07683229 0 0 57
-7.59793520 -12.54723740 4.07498789 0 0 58
-7.60806990 -12.54930115 4.07323647 0 0 60
-7.61644220 -12.55265617 4.07198858 0 0 61
-7.62769556 -12.55518341 4.07096958 0 0 60
-7.63652468 -12.55765820 4.06958580 0 0 60
-7.64777613 -12.56018448 4.06856871 0 0 61
-7.68027258 -12.56025124 4.05852079 0 0 62
-7.67535257 -12.56497383 4.06304693 0 0 62
-7.70224047 -12.56532288 4.05455637 0 0 64
-7.70527506 -12.56895161 4.05583096 0 0 63
-7.71410036 -12.57142830 4.05444670 0 0 61
-7.72208357 -12.57343102 4.05329275 0 0 59
-7.73607111 -12.57650185 4.05048513 0 0 58
-7.74790621 -12.57950878 4.04827261 0 0 58
-7.75458193 -12.58192158 4.04748487 0 0 58
-7.75564432 -12.58461475 4.04825544 0 0 58
-7.77008677 -12.58680630 4.04531240 0 0 57
-7.77370310 -12.59091854 4.04539299 0 0 57
-7.78167963 -12.59292221 4.04423857 0 0 56
-7.79005957 -12.59627533 4.04299068 0 0 56
-7.78915453 -12.59803963 4.04326057 0 0 55
-7.79753160 -12.60139275 4.04201221 0 0 55
-7.79944754 -12.60456276 4.04255247 0 0 55
-7.82633162 -12.60491371 4.03406191 0 0 54
-7.83803129 -12.60655785 4.03291082 0 0 54
-7.83909750 -12.60925293 4.03368139 0 0 55
-7.85321760 -12.61369133 4.02981281 0 0 55
-7.85252523 -12.61767673 4.03108883 0 0 56
-7.85965395 -12.61920834 4.03016472 0 0 56
-7.85869646 -12.62320328 4.03047228 0 0 56
-7.85733747 -12.62585163 4.03087950 0 0 56
-7.85898542 -12.62903023 4.03045559 0 0 57
-7.86821604 -12.63285637 4.02897453 0 0 56
-7.86600542 -12.63502884 4.02961159 0 0 56
-7.86249495 -12.63761330 4.03061342 0 0 56
-7.85677576 -12.64236736 4.03224897 0 0 56
-7.86906290 -12.64449501 4.02990294 0 0 56
-7.85949087 -12.64824390 4.03259993 0 0 57
-7.86113405 -12.65142250 4.03217840 0 0 57
-7.85945559 -12.65631294 4.03165865 0 0 57
-7.86384439 -12.66003418 4.02944469 0 0 57
-7.85022688 -12.66365051 4.03429985 0 0 57
-7.86027956 -12.66485405 4.03048563 0 0 57
-7.87517214 -12.66616058 4.02741003 0 0 57
-7.85253763 -12.67090988 4.03165960 0 0 58
-7.85961103 -12.67467690 4.03077555 0 0 58
-7.85120153 -12.67938900 4.03108549 0 0 58
-7.86883307 -12.68124104 4.02621508 0 0 58
-7.83008432 -12.68595219 4.03597260 0 0 58
-7.80353975 -12.69192886 4.04132652 0 0 58
-7.78345919 -12.69809532 4.04488611 0 0 58
-7.72198725 -12.70669270 4.05683708 0 0 58
-7.74092531 -12.70813751 4.05160284 0 0 58
-7.71639872 -12.71555138 4.05433321 0 0 58
-7.73219442 -12.71509552 4.05098486 0 0 58
-7.71844339 -12.72008514 4.05381393 0 0 58
-6.52597094 -12.42872620 4.25684738 0 0 62
-6.55948400 -12.43098259 4.25068998 0 0 60
-6.60022402 -12.43303871 4.24045038 0 0 62
-6.61515093 -12.43470383 4.24255371 0 0 61
-6.65131998 -12.43664742 4.23254442 0 0 60
-6.68639898 -12.43848419 4.22698832 0 0 61
-6.71344805 -12.44055367 4.22262239 0 0 61
-6.73350096 -12.44246101 4.21811628 0 0 61
-6.76624155 -12.44510555 4.21425295 0 0 61
-6.79517984 -12.44724941 4.20832682 0 0 61
-6.81603479 -12.44912529 4.20671558 0 0 59
-6.84909296 -12.45226479 4.20069361 0 0 57
-6.86098051 -12.45303726 4.19844437 0 0 56
-6.88241720 -12.45539093 4.19563484 0 0 56
-6.91893530 -12.45818520 4.18865347 0 0 57
-6.94863653 -12.45993996 4.18043280 0 0 57
-6.95526457 -12.46184921 4.18276739 0 0 57
-6.99084806 -12.46330833 4.17395353 0 0 57
-7.01417208 -12.46573639 4.16958666 0 0 58
-7.03103399 -12.46797752 4.16700935 0 0 58
-7.05593157 -12.46998596 4.16324091 0 0 58
-7.07795000 -12.47282410 4.15924025 0 0 57
-7.09611464 -12.47465515 4.15629578 0 0 57
-7.11540270 -12.47694874 4.15408754 0 0 57
-7.13742018 -12.47978687 4.15008640 0 0 57
-7.15212870 -12.48196507 4.14810514 0 0 56
-7.16814089 -12.48373604 4.14576054 0 0 56
-7.19258356 -12.48662663 4.14212418 0 0 56
-7.21159887 -12.48893166 4.13895178 0 0 56
-7.22388887 -12.49105644 4.13660574 0 0 56
-7.25534678 -12.49151802 4.12788486 0 0 57
-7.27417612 -12.49469376 4.12581015 0 0 56
-7.27923632 -12.49702454 4.12754726 0 0 56
-7.31481695 -12.49848366 4.11873198 0 0 56
-7.33095980 -12.50161934 4.11532640 0 0 57
-7.34697199 -12.50338554 4.11298037 0 0 56
-7.36279821 -12.50602722 4.11173248 0 0 57
-7.37508535 -12.50815296 4.10938692 0 0 58
-7.38849211 -12.51074219 4.10777283 0 0 58
-7.40293169 -12.51293182 4.10482836 0 0 58
-7.42194891 -12.51523590 4.10165644 0 0 57
-7.43750811 -12.51788807 4.09944296 0 0 57
-7.45306540 -12.52053738 4.09723282 0 0 56
-7.46319818 -12.52260208 4.09548426 0 0 56
-7.47705603 -12.52430916 4.09373617 0 0 55
-7.49216318 -12.52784157 4.09165907 0 0 55
-7.52550936 -12.52837753 4.08137894 0 0 55
-7.52261686 -12.53179932 4.08636808 0 0 55
-7.55577898 -12.53320789 4.07718611 0 0 55
-7.56918287 -12.53579617 4.07557297 0 0 56
-7.57931280 -12.53785992 4.07382298 0 0 57
-7.59056616 -12.54038620 4.07280350 0 0 57
-7.60069799 -12.54245281 4.07105637 0 0 57
-7.61468649 -12.54552269 4.06824827 0 0 57
-7.62463522 -12.54845810 4.06759596 0 0 59
-7.63346338 -12.55093193 4.06621218 0 0 59
-7.64790583 -12.55312157 4.06326675 0 0 58
-7.65915632 -12.55564785 4.06224966 0 0 59
-7.66798544 -12.55812263 4.06086493 0 0 61
-7.69572020 -12.55894279 4.05214882 0 0 61
-7.69080591 -12.56366730 4.05667353 0 0 64
-7.71665239 -12.56441879 4.04951334 0 0 61
-7.72202539 -12.56723785 4.04909086 0 0 61
-7.73543215 -12.56982613 4.04747629 0 0 59
-7.74556398 -12.57188988 4.04572582 0 0 58
-7.75870180 -12.57448959 4.04315042 0 0 58
-7.77053595 -12.57749557 4.04093790 0 0 58
-7.77721071 -12.57990837 4.04014730 0 0 58
-7.77697039 -12.58301544 4.04128647 0 0 57
-7.79226351 -12.58567810 4.03811407 0 0 57
-7.79503012 -12.58931732 4.03842449 0 0 57
-7.80300856 -12.59132195 4.03726816 0 0 56
-7.81269026 -12.59426498 4.03565550 0 0 56
-7.81263590 -12.59650040 4.03569508 0 0 55
-7.82231569 -12.59944916 4.03407669 0 0 55
-7.82337999 -12.60214520 4.03484917 0 0 55
-7.85353899 -12.60301781 4.02649784 0 0 55
-7.86412096 -12.60420227 4.02461243 0 0 55
-7.86603689 -12.60737038 4.02515173 0 0 55
-7.88172865 -12.61138058 4.02188158 0 0 56
-7.87731028 -12.61573029 4.02315331 0 0 57
-7.88574457 -12.61684990 4.02186489 0 0 58
-7.88935900 -12.62096405 4.02194405 0 0 57
-7.88800383 -12.62360859 4.02234697 0 0 57
-7.88965082 -12.62678719 4.02192640 0 0 57
-7.90018320 -12.63020706 4.02007961 0 0 58
-7.89927626 -12.63196754 4.02035093 0 0 57
-7.89746809 -12.63549423 4.02089071 0 0 56
-7.89004850 -12.63930416 4.02299023 0 0 56
-7.90018034 -12.64137268 4.02123880 0 0 57
-7.89145613 -12.64559078 4.02370596 0 0 58
-7.89571047 -12.64795113 4.02255154 0 0 58
-7.89645338 -12.65289307 4.02239656 0 0 57
-7.90344477 -12.65579605 4.01945257 0 0 57
-7.89153051 -12.66035652 4.02384472 0 0 56
-7.90073252 -12.66108418 4.02026224 0 0 57
-7.91432142 -12.66280365 4.01754951 0 0 57
-7.89253569 -12.66802406 4.02157259 0 0 57
-7.90221739 -12.67096996 4.01995707 0 0 57
-7.89295721 -12.67521286 4.02049685 0 0 58
-7.91189051 -12.67665482 4.01526165 0 0 58
-7.87556505 -12.68141937 4.02538872 0 0 58
-7.85633326 -12.68805504 4.02871752 0 0 58
-7.84518480 -12.69222069 4.03081846 0 0 58
-7.79089975 -12.70011806 4.04180622 0 0 58
-7.81068754 -12.70203304 4.03633785 0 0 57
-7.77336550 -12.71043777 4.04159164 0 0 58
-7.79392385 -12.70922375 4.03691244 0 0 58
-7.75674105 -12.71625233 4.04418898 0 0 58
-7.76445150 -12.71826363 4.04207373 0 0 57
-6.52947664 -12.42888069 4.25275993 0 0 61
-6.56559420 -12.43031883 4.24587202 0 0 61
-6.60588408 -12.43325806 4.23576784 0 0 62
-6.62126398 -12.43404198 4.23773861 0 0 60
-6.65743113 -12.43598366 4.22773075 0 0 60
-6.69291067 -12.43917656 4.22207355 0 0 62
-6.71955919 -12.43989182 4.21780634 0 0 61
-6.73987913 -12.44178963 4.21426582 0 0 62
-6.77235365 -12.44444370 4.20943689 0 0 62
-6.80259752 -12.44617939 4.20314550 0 0 61
-6.82384920 -12.44940376 4.20143652 0 0 60
-6.85735750 -12.45166302 4.19527960 0 0 58
-6.86924696 -12.45243645 4.19303274 0 0 57
-6.89198923 -12.45438004 4.18985987 0 0 57
-6.92877340 -12.45716286 4.18383837 0 0 57
-6.95932627 -12.45939064 4.17538691 0 0 57
-6.96595335 -12.46129894 4.17772150 0 0 57
-7.00238848 -12.46323204 4.16867590 0 0 57
-7.02270842 -12.46512604 4.16513777 0 0 58
-7.04060507 -12.46696663 4.16123056 0 0 58
-7.06549788 -12.46897697 4.15746260 0 0 58
-7.08863974 -12.47227669 4.15419340 0 0 57
-7.10810900 -12.47369766 4.15088558 0 0 57
-7.12712240 -12.47600174 4.14771128 0 0 57
-7.15053034 -12.47929001 4.14540720 0 0 57
-7.16457224 -12.48012638 4.14255905 0 0 56
-7.18013239 -12.48277664 4.14034748 0 0 56
-7.20457411 -12.48567009 4.13671350 0 0 56
-7.22489405 -12.48756313 4.13317394 0 0 56
-7.23718309 -12.48969078 4.13082790 0 0 57
-7.26819086 -12.49103355 4.12224245 0 0 57
-7.28702021 -12.49421120 4.12016726 0 0 56
-7.29364538 -12.49611855 4.12250042 0 0 56
-7.32869768 -12.49759865 4.11175966 0 0 57
-7.34425497 -12.50024891 4.10955095 0 0 58
-7.36223841 -12.50295353 4.10770416 0 0 57
-7.37478876 -12.50507069 4.10632133 0 0 58
-7.38792658 -12.50766754 4.10374308 0 0 58
-7.40263700 -12.50984764 4.10176229 0 0 57
-7.41707659 -12.51203537 4.09882116 0 0 57
-7.43694162 -12.51481247 4.09541464 0 0 56
-7.45295572 -12.51657963 4.09307051 0 0 57
-7.46851397 -12.51923180 4.09085798 0 0 56
-7.47949743 -12.52177048 4.08887815 0 0 55
-7.49335718 -12.52347469 4.08712816 0 0 55
-7.50761175 -12.52653503 4.08528519 0 0 55
-7.54207754 -12.52753258 4.07573605 0 0 55
-7.54021788 -12.53055763 4.07939720 0 0 55
-7.57252836 -12.53149223 4.07044554 0 0 56
-7.58593225 -12.53407955 4.06883383 0 0 57
-7.59502935 -12.53654480 4.06841135 0 0 57
-7.60601473 -12.53907967 4.06643105 0 0 57
-7.61784887 -12.54209328 4.06421947 0 0 57
-7.63255644 -12.54426765 4.06223965 0 0 57
-7.64354181 -12.54680347 4.06025934 0 0 58
-7.65263796 -12.54926872 4.05983686 0 0 58
-7.67008352 -12.55199337 4.05606413 0 0 58
-7.67917776 -12.55445671 4.05564499 0 0 59
-7.68670607 -12.55733967 4.05462742 0 0 61
-7.71143675 -12.55762768 4.04673481 0 0 59
-7.70521688 -12.56276035 4.05162954 0 0 62
-7.73470736 -12.56229019 4.04240608 0 0 58
-7.74119997 -12.56557274 4.04271460 0 0 59
-7.75649214 -12.56823635 4.03954363 0 0 59
-7.76689196 -12.57029057 4.03875542 0 0 58
-7.78002691 -12.57288742 4.03617811 0 0 58
-7.78970861 -12.57583523 4.03456306 0 0 58
-7.79939032 -12.57877922 4.03294897 0 0 58
-7.79960299 -12.58100510 4.03395081 0 0 57
-7.81619787 -12.58325577 4.03041220 0 0 57
-7.81896162 -12.58689690 4.03072119 0 0 57
-7.82824755 -12.58849144 4.02920103 0 0 56
-7.83401632 -12.59266663 4.02868462 0 0 55
-7.83526564 -12.59449387 4.02835894 0 0 55
-7.84624910 -12.59702778 4.02637815 0 0 55
-7.84928083 -12.60065842 4.02765226 0 0 55
-7.87832117 -12.60106945 4.01856422 0 0 55
-7.88701868 -12.60218048 4.01823902 0 0 56
-7.89153910 -12.60452747 4.01804590 0 0 56
-7.91023588 -12.60907841 4.01394939 0 0 57
-7.90366697 -12.61336231 4.01582003 0 0 58
-7.90922403 -12.61531067 4.01429844 0 0 59
-7.91544867 -12.61860371 4.01364517 0 0 60
-7.91520929 -12.62171173 4.01478338 0 0 59
-7.91600370 -12.62441826 4.01459169 0 0 59
-7.92653418 -12.62783623 4.01274633 0 0 60
-7.92778444 -12.62965965 4.01242113 0 0 59
-7.92858362 -12.63237000 4.01222897 0 0 58
-7.92071104 -12.63706303 4.01445961 0 0 56
-7.92738771 -12.63947487 4.01367331 0 0 57
-7.91996622 -12.64328575 4.01577377 0 0 58
-7.92551947 -12.64523411 4.01425362 0 0 58
-7.92841959 -12.65023804 4.01350260 0 0 58
-7.93541098 -12.65314293 4.01055574 0 0 57
-7.92695475 -12.65735435 4.01398754 0 0 57
-7.93615294 -12.65808678 4.01040697 0 0 57
-7.95046282 -12.65890884 4.00852346 0 0 57
-7.93083239 -12.66419220 4.01194906 0 0 57
-7.94051313 -12.66714096 4.01033258 0 0 57
-7.93295813 -12.67232704 4.01040888 0 0 58
-7.95346117 -12.67334938 4.00577116 0 0 58
-7.91947317 -12.67730141 4.01420355 0 0 58
-7.90154409 -12.68352795 4.01716852 0 0 58
-7.89497232 -12.68781281 4.01903439 0 0 58
-7.85348463 -12.69471931 4.02750635 0 0 58
-7.87483835 -12.69621372 4.02263594 0 0 58
-7.84357977 -12.70344925 4.02619219 0 0 58
-7.86525774 -12.70269775 4.02225018 0 0 58
-7.82277918 -12.71050644 4.02892542 0 0 57
-7.82357645 -12.71321392 4.02873468 0 0 57
-7.79449892 -12.72361088 4.03379869 0 0 56
-6.50136042 -12.42685318 4.25327349 0 0 58
-6.53186464 -12.42857456 4.24794245 0 0 61
-6.56995344 -12.43095016 4.24155807 0 0 61
-6.60984373 -12.43253136 4.23154783 0 0 61
-6.62692118 -12.43425751 4.23305655 0 0 61
-6.66223860 -12.43573093 4.22327709 0 0 61
-6.69817209 -12.43803978 4.21748877 0 0 62
-6.72652388 -12.43970299 4.21275759 0 0 62
-6.74554110 -12.44200420 4.20958376 0 0 62
-6.77931929 -12.44425201 4.20439005 0 0 62
-6.80955935 -12.44598579 4.19809866 0 0 61
-6.83126593 -12.44833183 4.19625711 0 0 59
-6.86562395 -12.45106125 4.18986940 0 0 58
-6.87751341 -12.45183468 4.18761969 0 0 58
-6.90137243 -12.45424461 4.18518114 0 0 58
-6.93788958 -12.45703411 4.17819452 0 0 58
-6.96889734 -12.45838165 4.16961050 0 0 57
-6.97663927 -12.46074867 4.17267609 0 0 57
-7.01195669 -12.46222210 4.16290092 0 0 57
-7.03182459 -12.46499634 4.15949392 0 0 58
-7.04913855 -12.46635723 4.15678167 0 0 57
-7.07488489 -12.46883583 4.15278196 0 0 58
-7.10063314 -12.47131538 4.14877939 0 0 57
-7.12009954 -12.47273922 4.14547157 0 0 57
-7.13911581 -12.47504425 4.14230013 0 0 57
-7.16252184 -12.47833252 4.13999462 0 0 57
-7.17741728 -12.47964096 4.13691664 0 0 56
-7.19297552 -12.48229218 4.13470507 0 0 56
-7.21787119 -12.48430061 4.13093567 0 0 56
-7.23661947 -12.48661423 4.12680054 0 0 57
-7.25002432 -12.48920250 4.12518454 0 0 57
-7.28018045 -12.49007416 4.11683035 0 0 57
-7.30116510 -12.49331284 4.11415911 0 0 56
-7.30648851 -12.49563217 4.11685896 0 0 56
-7.34180784 -12.49710083 4.10707998 0 0 59
-7.35709620 -12.49976158 4.10390663 0 0 59
-7.37552881 -12.50158215 4.10192728 0 0 58
-7.38678026 -12.50411034 4.10090876 0 0 58
-7.40207243 -12.50677109 4.09773493 0 0 57
-7.41808558 -12.50854111 4.09538841 0 0 56
-7.43279314 -12.51072121 4.09340906 0 0 56
-7.45180845 -12.51302338 4.09023523 0 0 56
-7.46710062 -12.51568222 4.08706141 0 0 56
-7.48377752 -12.51879692 4.08558464 0 0 56
-7.49521208 -12.52045155 4.08346653 0 0 55
-7.50992060 -12.52262878 4.08148623 0 0 55
-7.52306032 -12.52523041 4.07890987 0 0 55
-7.55994654 -12.52627945 4.06972980 0 0 55
-7.55566740 -12.52925301 4.07302141 0 0 56
-7.58824492 -12.53017521 4.06503487 0 0 57
-7.60250044 -12.53323746 4.06319237 0 0 58
-7.61133051 -12.53570938 4.06180573 0 0 58
-7.62231207 -12.53824902 4.05982733 0 0 57
-7.63486719 -12.54036522 4.05844402 0 0 56
-7.65172911 -12.54260635 4.05586720 0 0 56
-7.66356325 -12.54561615 4.05365610 0 0 57
-7.67239523 -12.54808617 4.05227184 0 0 57
-7.68710184 -12.55026817 4.05028868 0 0 58
-7.69377756 -12.55268097 4.04950285 0 0 59
-7.70085192 -12.55644608 4.04862022 0 0 60
-7.72904253 -12.55638504 4.03976202 0 0 57
-7.72327185 -12.56063652 4.04452229 0 0 58
-7.75558233 -12.56157112 4.03557062 0 0 56
-7.75991964 -12.56479263 4.03647995 0 0 57
-7.77436209 -12.56698227 4.03353453 0 0 58
-7.78449297 -12.56904602 4.03178453 0 0 58
-7.79874945 -12.57210922 4.02993917 0 0 58
-7.80973196 -12.57464409 4.02796078 0 0 59
-7.81901598 -12.57623672 4.02644157 0 0 59
-7.82308531 -12.57946777 4.02638388 0 0 58
-7.83909464 -12.58123589 4.02403927 0 0 59
-7.84401751 -12.58493996 4.02375460 0 0 58
-7.85388041 -12.58701515 4.02103949 0 0 57
-7.85880041 -12.59071541 4.02075195 0 0 56
-7.85874701 -12.59295273 4.02079010 0 0 56
-7.86869669 -12.59588814 4.02013922 0 0 56
-7.87406874 -12.59871101 4.01971960 0 0 55
-7.90010023 -12.59858799 4.01145840 0 0 56
-7.91050291 -12.60064125 4.01067352 0 0 57
-7.91502333 -12.60299110 4.01048374 0 0 58
-7.93286657 -12.60706711 4.00661516 0 0 61
-7.93060732 -12.61147690 4.00728846 0 0 59
-7.93557978 -12.61294365 4.00696230 0 0 59
-7.93592405 -12.61653233 4.00690603 0 0 61
-7.93914270 -12.61929417 4.00708342 0 0 61
-7.94078875 -12.62246990 4.00665951 0 0 60
-7.94871569 -12.62670708 4.00554419 0 0 61
-7.94911242 -12.62806225 4.00544786 0 0 61
-7.95121241 -12.63035679 4.00488997 0 0 59
-7.94922018 -12.63475609 4.00652790 0 0 57
-7.95607996 -12.63629723 4.00464487 0 0 57
-7.94932413 -12.64144993 4.00761080 0 0 58
-7.95533228 -12.64251995 4.00595617 0 0 59
-7.95953417 -12.64711571 4.00484037 0 0 59
-7.96607447 -12.65089989 4.00202990 0 0 58
-7.96049166 -12.65428162 4.00569010 0 0 57
-7.96969080 -12.65501022 4.00211096 0 0 57
-7.98327875 -12.65672970 3.99939632 0 0 57
-7.96867800 -12.66124535 4.00245810 0 0 57
-7.97750616 -12.66371918 4.00107431 0 0 58
-7.97340822 -12.66856003 4.00018692 0 0 58
-7.99045801 -12.66992760 3.99651289 0 0 59
-7.96189165 -12.67447186 4.00448322 0 0 58
-7.94571924 -12.67940617 4.00694609 0 0 59
-7.93973494 -12.68416977 4.00762033 0 0 58
-7.90457296 -12.68989944 4.01535892 0 0 59
-7.92592764 -12.69139385 4.01049137 0 0 59
-7.90616083 -12.69805145 4.01189566 0 0 58
-7.92326689 -12.69718647 4.00817919 0 0 59
-7.89299345 -12.70351982 4.01352882 0 0 58
-7.89248705 -12.70663834 4.01370382 0 0 58
-7.79643869 -12.72144699 4.03219843 0 0 56
-7.83495378 -12.71984291 4.02357531 0 0 56
-6.50459909 -12.42701721 4.24822378 0 0 59
-6.53452158 -12.42825890 4.24409103 0 0 60
-6.57260847 -12.43063164 4.23770285 0 0 62
-6.61353540 -12.43181801 4.22636557 0 0 61
-6.63173246 -12.43400764 4.22860670 0 0 61
-6.66704893 -12.43547821 4.21882868 0 0 62
-6.70298338 -12.43778801 4.21303844 0 0 63
-6.73133421 -12.43944740 4.20830822 0 0 62
-6.75165510 -12.44134331 4.20476866 0 0 62
-6.78570032 -12.44358063 4.20054007 0 0 62
-6.81436872 -12.44573402 4.19364977 0 0 61
-6.83934546 -12.44860458 4.19194269 0 0 59
-6.87415934 -12.45044899 4.18541861 0 0 58
-6.88604879 -12.45122528 4.18316793 0 0 58
-6.90963984 -12.45364189 4.17976522 0 0 58
-6.94642496 -12.45642471 4.17374563 0 0 58
-6.97873545 -12.45735931 4.16479349 0 0 58
-6.98706198 -12.46021271 4.16666555 0 0 57
-7.02134275 -12.46208191 4.15821695 0 0 57
-7.04251146 -12.46444798 4.15444851 0 0 57
-7.05870867 -12.46534538 4.15100241 0 0 57
-7.08445597 -12.46782875 4.14700413 0 0 57
-7.11131716 -12.47076988 4.14373636 0 0 57
-7.13078833 -12.47219086 4.14042711 0 0 57
-7.15065718 -12.47496700 4.13702345 0 0 57
-7.17339563 -12.47691154 4.13384962 0 0 56
-7.18940687 -12.47868156 4.13150406 0 0 56
-7.20496702 -12.48133373 4.12929344 0 0 56
-7.23044443 -12.48382473 4.12432957 0 0 57
-7.24861097 -12.48565769 4.12138844 0 0 57
-7.26201487 -12.48824501 4.11977625 0 0 57
-7.29172182 -12.49000168 4.11155510 0 0 57
-7.31446028 -12.49194431 4.10838032 0 0 57
-7.31978273 -12.49426270 4.11108255 0 0 57
-7.35294676 -12.49567223 4.10190010 0 0 59
-7.36908770 -12.49880409 4.09849310 0 0 60
-7.38595057 -12.50104523 4.09591770 0 0 59
-7.39962149 -12.50362396 4.09526730 0 0 57
-7.41622114 -12.50587368 4.09172630 0 0 56
-7.43308115 -12.50811863 4.08914804 0 0 56
-7.44779253 -12.51029587 4.08716869 0 0 56
-7.46680498 -12.51260185 4.08399725 0 0 55
-7.48124552 -12.51478767 4.08105135 0 0 55
-7.49837542 -12.51702023 4.07943773 0 0 55
-7.51151419 -12.51961899 4.07686186 0 0 55
-7.52622175 -12.52179623 4.07488203 0 0 55
-7.54008055 -12.52350426 4.07313442 0 0 55
-7.57624578 -12.52544785 4.06312418 0 0 55
-7.57138205 -12.52793503 4.06761217 0 0 56
-7.60324144 -12.52975464 4.05879736 0 0 57
-7.61664534 -12.53234291 4.05718374 0 0 59
-7.62677717 -12.53440475 4.05543280 0 0 58
-7.63933325 -12.53652096 4.05404949 0 0 57
-7.65404177 -12.53870106 4.05207014 0 0 57
-7.66803026 -12.54177284 4.04926062 0 0 57
-7.68012953 -12.54476929 4.04801416 0 0 57
-7.68680620 -12.54718208 4.04722452 0 0 57
-7.69994307 -12.54978180 4.04464769 0 0 57
-7.70662069 -12.55219269 4.04385757 0 0 57
-7.71760511 -12.55472946 4.04187918 0 0 57
-7.74690962 -12.55513000 4.03375530 0 0 55
-7.74460173 -12.55903625 4.03755236 0 0 56
-7.77475786 -12.55990982 4.02919912 0 0 56
-7.78039885 -12.56272125 4.02974176 0 0 56
-7.79223013 -12.56572533 4.02752733 0 0 57
-7.80236197 -12.56779194 4.02577639 0 0 57
-7.81550264 -12.57039261 4.02320004 0 0 58
-7.82890368 -12.57298088 4.02158499 0 0 59
-7.83773470 -12.57545280 4.02020216 0 0 60
-7.84355879 -12.57739353 4.01964664 0 0 59
-7.85539484 -12.58040333 4.01743412 0 0 61
-7.86404181 -12.58374882 4.01714706 0 0 62
-7.87462664 -12.58493042 4.01526308 0 0 61
-7.88228083 -12.58918095 4.01318502 0 0 57
-7.88209677 -12.59005070 4.01428413 0 0 57
-7.89132547 -12.59387684 4.01280308 0 0 57
-7.89669657 -12.59669876 4.01238298 0 0 56
-7.92254686 -12.59745026 4.00522041 0 0 57
-7.93313265 -12.59863091 4.00333548 0 0 58
-7.93635130 -12.60139084 4.00351286 0 0 60
-7.94943571 -12.60622406 4.00097466 0 0 63
-7.95350313 -12.60945415 4.00091696 0 0 62
-7.95735979 -12.61046028 3.99985743 0 0 61
-7.95594835 -12.61534214 4.00030375 0 0 61
-7.95916605 -12.61810303 4.00047779 0 0 62
-7.96342039 -12.62046051 3.99932337 0 0 62
-7.97264814 -12.62428665 3.99784327 0 0 61
-7.97304583 -12.62564087 3.99774933 0 0 61
-7.97339106 -12.62923050 3.99769068 0 0 59
-7.97557306 -12.63238811 3.99919653 0 0 58
-7.98458910 -12.63399124 3.99671125 0 0 57
-7.97756815 -12.63915825 3.99871683 0 0 58
-7.98168993 -12.64015007 3.99862099 0 0 59
-7.99019861 -12.64487267 3.99631405 0 0 60
-7.99718904 -12.64777660 3.99336576 0 0 58
-7.99160814 -12.65115643 3.99702787 0 0 57
-7.99950171 -12.65229607 3.99381161 0 0 57
-8.01309586 -12.65401649 3.99109888 0 0 57
-7.99979448 -12.65812302 3.99379396 0 0 58
-8.00947380 -12.66106796 3.99217701 0 0 58
-8.00694656 -12.66548729 3.99189186 0 0 59
-8.02157021 -12.66680431 3.98784876 0 0 60
-7.99862051 -12.67106056 3.99426079 0 0 59
-7.98702478 -12.67611313 3.99649334 0 0 60
-7.98233652 -12.68046761 3.99680042 0 0 59
-7.94933081 -12.68625641 4.00394201 0 0 59
-7.97068644 -12.68775177 3.99907446 0 0 59
-7.95595026 -12.69363976 4.00011301 0 0 59
-7.97044325 -12.69359589 3.99712992 0 0 59
-7.94996309 -12.69840622 4.00078630 0 0 59
-7.95291281 -12.70117760 3.99999666 0 0 58
-7.85125685 -12.71626949 4.02005529 0 0 56
-7.89825201 -12.71354961 4.01010227 0 0 57
-7.83279276 -12.72251892 4.02108955 0 0 57
-6.50810671 -12.42717361 4.24414015 0 0 60
-6.53605795 -12.42748356 4.23950291 0 0 59
-6.57656527 -12.42990685 4.23348475 0 0 61
-6.61704111 -12.43197441 4.22228146 0 0 61
-6.63654184 -12.43375397 4.22415590 0 0 61
-6.67100954 -12.43475151 4.21461058 0 0 63
-6.70622206 -12.43795395 4.20799017 0 0 64
-6.73568964 -12.44007683 4.20399523 0 0 63
-6.75776815 -12.44067764 4.19995260 0 0 62
-6.79136133 -12.44379807 4.19585848 0 0 62
-6.82048273 -12.44507027 4.18883371 0 0 60
-6.84676218 -12.44752979 4.18675900 0 0 59
-6.88112402 -12.45026016 4.18037415 0 0 58
-6.89301062 -12.45103264 4.17812204 0 0 58
-6.91732073 -12.45255852 4.17554617 0 0 59
-6.95468855 -12.45582485 4.16833258 0 0 58
-6.98700094 -12.45675945 4.15938139 0 0 58
-6.99559450 -12.45960140 4.16221857 0 0 57
-7.03006220 -12.46060085 4.15267038 0 0 58
-7.05338430 -12.46302795 4.14830351 0 0 57
-7.06939936 -12.46479797 4.14595461 0 0 56
-7.09429312 -12.46680450 4.14218664 0 0 56
-7.12088823 -12.46975899 4.13795710 0 0 57
-7.14035845 -12.47118092 4.13464832 0 0 57
-7.16134119 -12.47441864 4.13197517 0 0 57
-7.18408442 -12.47636414 4.12880373 0 0 56
-7.20067835 -12.47861671 4.12526560 0 0 56
-7.21695757 -12.48037148 4.12388134 0 0 57
-7.24243593 -12.48286629 4.11891794 0 0 58
-7.26060152 -12.48469543 4.11597443 0 0 57
-7.27401018 -12.48728466 4.11436176 0 0 57
-7.30501318 -12.48863029 4.10577869 0 0 57
-7.32730246 -12.49145794 4.10273838 0 0 58
-7.33235979 -12.49378586 4.10447645 0 0 58
-7.36421537 -12.49560547 4.09566069 0 0 59
-7.38108110 -12.49784660 4.09308290 0 0 59
-7.39794111 -12.50008774 4.09050751 0 0 58
-7.41376925 -12.50272751 4.08925676 0 0 57
-7.42951345 -12.50450611 4.08594847 0 0 56
-7.44637346 -12.50674820 4.08337355 0 0 56
-7.46238756 -12.50851822 4.08102560 0 0 55
-7.48225260 -12.51129532 4.07762194 0 0 55
-7.49696016 -12.51347351 4.07564068 0 0 55
-7.51337290 -12.51659584 4.07320023 0 0 55
-7.52611017 -12.51784039 4.07071924 0 0 55
-7.54167032 -12.52048969 4.06850672 0 0 56
-7.55853415 -12.52273369 4.06592989 0 0 56
-7.59169436 -12.52414227 4.05674982 0 0 57
-7.58795023 -12.52709198 4.06196976 0 0 56
-7.61869097 -12.52844620 4.05242014 0 0 57
-7.62994051 -12.53097153 4.05140495 0 0 58
-7.64092493 -12.53351212 4.04942417 0 0 58
-7.65693617 -12.53527832 4.04708052 0 0 57
-7.67034388 -12.53786850 4.04546261 0 0 58
-7.68217516 -12.54087734 4.04325151 0 0 57
-7.69558001 -12.54346657 4.04163885 0 0 57
-7.70225477 -12.54587746 4.04085112 0 0 55
-7.71669531 -12.54806519 4.03790903 0 0 55
-7.72422171 -12.55095100 4.03688860 0 0 55
-7.73547411 -12.55348015 4.03587198 0 0 55
-7.76523161 -12.55299568 4.02761364 0 0 54
-7.76462126 -12.55784225 4.03094530 0 0 55
-7.79262495 -12.55865479 4.02319145 0 0 55
-7.80015421 -12.56153870 4.02217197 0 0 56
-7.81225538 -12.56453705 4.02092218 0 0 56
-7.82153559 -12.56613159 4.01940584 0 0 56
-7.83467531 -12.56872940 4.01682806 0 0 57
-7.84650850 -12.57173729 4.01461554 0 0 59
-7.85475492 -12.57372856 4.01442623 0 0 60
-7.86012793 -12.57655144 4.01400328 0 0 60
-7.87241316 -12.57867813 4.01165628 0 0 61
-7.87948751 -12.58244419 4.01077271 0 0 63
-7.89092398 -12.58409691 4.00865698 0 0 63
-7.90360785 -12.58757782 4.00621557 0 0 60
-7.90512323 -12.58939362 4.00685263 0 0 58
-7.91395521 -12.59186745 4.00546694 0 0 58
-7.91932917 -12.59468842 4.00504446 0 0 58
-7.94387484 -12.59584808 3.99825191 0 0 59
-7.95315504 -12.59743977 3.99673223 0 0 60
-7.95310163 -12.59967709 3.99676991 0 0 61
-7.96618605 -12.60451031 3.99423218 0 0 61
-7.96895170 -12.60815048 3.99453974 0 0 63
-7.97608042 -12.60968018 3.99361897 0 0 61
-7.97857714 -12.61332893 3.99296761 0 0 60
-7.97964239 -12.61602783 3.99373770 0 0 60
-7.98259401 -12.61879730 3.99295235 0 0 61
-7.99743414 -12.62233925 3.98991060 0 0 61
-7.99809885 -12.62368393 3.99077749 0 0 61
-8.00104904 -12.62645054 3.98999071 0 0 58
-7.99905443 -12.63084698 3.99162722 0 0 58
-8.00833702 -12.63244057 3.99010849 0 0 57
-8.00391960 -12.63678741 3.99138069 0 0 57
-8.00517082 -12.63861179 3.99105501 0 0 59
-8.01412964 -12.64245033 3.98861170 0 0 60
-8.02309227 -12.64628887 3.98616648 0 0 58
-8.02011490 -12.64885139 3.98909616 0 0 58
-8.02774239 -12.65000153 3.98491716 0 0 57
-8.04290390 -12.65130043 3.98279905 0 0 57
-8.02673340 -12.65623665 3.98526525 0 0 57
-8.03798103 -12.65876389 3.98424768 0 0 58
-8.03518677 -12.66319084 3.98299646 0 0 59
-8.05066490 -12.66498184 3.97872353 0 0 59
-8.02973747 -12.66793442 3.98559618 0 0 60
-8.01944351 -12.67257595 3.98746729 0 0 60
-8.02018356 -12.67752075 3.98731279 0 0 59
-7.99220514 -12.68254089 3.99408674 0 0 59
-8.01140594 -12.68397331 3.98981619 0 0 59
-7.99855375 -12.68993568 3.98929358 0 0 59
-8.01350021 -12.68900776 3.98617792 0 0 59
-7.99759436 -12.69393539 3.98960400 0 0 59
-8.00485611 -12.69683075 3.98762131 0 0 59
-7.91801691 -12.70963192 4.00561857 0 0 57
-7.96213770 -12.70774269 3.99543428 0 0 58
-7.88415194 -12.71768951 4.00990629 0 0 57
-7.88449526 -12.72127819 4.00985146 0 0 59
-6.50991106 -12.42638779 4.24051571 0 0 60
-6.53826189 -12.42805004 4.23578405 0 0 59
-6.57849932 -12.43048573 4.22880411 0 0 61
-6.61969519 -12.43165779 4.21842957 0 0 61
-6.64023542 -12.43303871 4.21897411 0 0 62
-6.67424822 -12.43491936 4.20956182 0 0 64
-6.71129847 -12.43768978 4.20450592 0 0 65
-6.73965120 -12.43935013 4.19977236 0 0 63
-6.76257563 -12.44042587 4.19550085 0 0 62
-6.79635668 -12.44267273 4.19030905 0 0 61
-6.82744551 -12.44487858 4.18378496 0 0 59
-6.85372591 -12.44733715 4.18171310 0 0 59
-6.88853979 -12.44918823 4.17519331 0 0 59
-6.90127993 -12.45042992 4.17270899 0 0 59
-6.92428732 -12.45236969 4.17050028 0 0 59
-6.96295786 -12.45522118 4.16291952 0 0 59
-6.99508333 -12.45702934 4.15506697 0 0 59
-7.00431585 -12.45811939 4.15667200 0 0 58
-7.03787565 -12.46087837 4.14739180 0 0 58
-7.06146860 -12.46329689 4.14398718 0 0 58
-7.07878256 -12.46465874 4.14127779 0 0 56
-7.10498095 -12.46625900 4.13714218 0 0 56
-7.13027430 -12.46961689 4.13327551 0 0 56
-7.14974451 -12.47104168 4.12996912 0 0 56
-7.17091417 -12.47340775 4.12619734 0 0 56
-7.19477224 -12.47581577 4.12375879 0 0 56
-7.21051645 -12.47759438 4.12044954 0 0 56
-7.22737837 -12.47983360 4.11787271 0 0 57
-7.25312376 -12.48231792 4.11387062 0 0 58
-7.27129221 -12.48414993 4.11092949 0 0 57
-7.28599787 -12.48632812 4.10895157 0 0 57
-7.31830740 -12.48726273 4.09999990 0 0 57
-7.33902597 -12.49051094 4.09636497 0 0 58
-7.34435129 -12.49282837 4.09906435 0 0 58
-7.37620974 -12.49464607 4.09024858 0 0 59
-7.39392233 -12.49735832 4.08744144 0 0 58
-7.41208887 -12.49918938 4.08449650 0 0 57
-7.42791414 -12.50183296 4.08324909 0 0 56
-7.44307375 -12.50312805 4.08113480 0 0 56
-7.45966959 -12.50538063 4.07759619 0 0 56
-7.47653246 -12.50762177 4.07501698 0 0 55
-7.49640131 -12.51039791 4.07161283 0 0 56
-7.51025724 -12.51210403 4.06986523 0 0 55
-7.52751684 -12.51569843 4.06719160 0 0 55
-7.54137373 -12.51740837 4.06544352 0 0 55
-7.55626917 -12.51871300 4.06236506 0 0 56
-7.57424784 -12.52141571 4.06052160 0 0 57
-7.60610914 -12.52323532 4.05170536 0 0 58
-7.60339785 -12.52578545 4.05559778 0 0 56
-7.63198423 -12.52708054 4.04664469 0 0 57
-7.64520311 -12.53054047 4.04612875 0 0 57
-7.65749121 -12.53266430 4.04378080 0 0 58
-7.67265177 -12.53396225 4.04166842 0 0 58
-7.68363428 -12.53649616 4.03968573 0 0 59
-7.69632196 -12.53997993 4.03724337 0 0 57
-7.70972681 -12.54256916 4.03563070 0 0 56
-7.72012472 -12.54462051 4.03484535 0 0 54
-7.73541689 -12.54728317 4.03166962 0 0 54
-7.74424696 -12.54975796 4.03028345 0 0 54
-7.75464678 -12.55181313 4.02950001 0 0 54
-7.78368711 -12.55222416 4.02040958 0 0 54
-7.78164148 -12.55611801 4.02517080 0 0 55
-7.81153059 -12.55700207 4.01585579 0 0 54
-7.81932688 -12.55987549 4.01579809 0 0 55
-7.83115816 -12.56288528 4.01358795 0 0 56
-7.84070921 -12.56446838 4.01303244 0 0 56
-7.85469866 -12.56753731 4.01022243 0 0 57
-7.86438036 -12.57048416 4.00860834 0 0 58
-7.87235880 -12.57248497 4.00745344 0 0 59
-7.87772989 -12.57530594 4.00703478 0 0 60
-7.89244127 -12.57748604 4.00505161 0 0 61
-7.89780951 -12.58030796 4.00463200 0 0 63
-7.90924692 -12.58196449 4.00251579 0 0 64
-7.92193460 -12.58544350 4.00007248 0 0 63
-7.92560148 -12.58732033 4.00011158 0 0 61
-7.93613577 -12.59074020 3.99826670 0 0 60
-7.94065714 -12.59308910 3.99807596 0 0 59
-7.96349955 -12.59330368 3.99174166 0 0 60
-7.97363138 -12.59536743 3.98999596 0 0 60
-7.97227335 -12.59801102 3.99039793 0 0 61
-7.99038649 -12.60207939 3.98749495 0 0 60
-7.98812532 -12.60648632 3.98817062 0 0 60
-7.99525023 -12.60801506 3.98724747 0 0 60
-8.00232697 -12.61178207 3.98636484 0 0 59
-8.00442696 -12.61407852 3.98580599 0 0 58
-8.00392151 -12.61719704 3.98597956 0 0 59
-8.01660538 -12.62067795 3.98353815 0 0 60
-8.01942635 -12.62208176 3.98380852 0 0 60
-8.02524948 -12.62402058 3.98325205 0 0 59
-8.02298737 -12.62842846 3.98392582 0 0 57
-8.03227043 -12.63002396 3.98240709 0 0 57
-8.02915764 -12.63395882 3.98331356 0 0 57
-8.03152657 -12.63624668 3.98371744 0 0 57
-8.03545761 -12.64085007 3.98164129 0 0 59
-8.04832649 -12.64345932 3.97810030 0 0 57
-8.04620361 -12.64649582 3.98079634 0 0 57
-8.05540276 -12.64722538 3.97721720 0 0 57
-8.07226562 -12.64946842 3.97464037 0 0 57
-8.05784988 -12.65311146 3.97660255 0 0 56
-8.06752777 -12.65605545 3.97498751 0 0 57
-8.06284523 -12.66041279 3.97529411 0 0 58
-8.08047867 -12.66226768 3.97042322 0 0 57
-8.05739212 -12.66515732 3.97789526 0 0 59
-8.05010414 -12.67033195 3.97893524 0 0 59
-8.05390930 -12.67357445 3.97791386 0 0 59
-8.03023338 -12.67872238 3.98350143 0 0 59
-8.04898262 -12.68103600 3.97936201 0 0 59
-8.04188156 -12.68533993 3.97930431 0 0 58
-8.05637360 -12.68529224 3.97631884 0 0 58
-8.04235458 -12.69029522 3.97818804 0 0 59
-8.04903030 -12.69270515 3.97740221 0 0 59
-7.97687101 -12.70458984 3.99131536 0 0 58
-8.01780128 -12.70303726 3.98305893 0 0 58
-7.94933748 -12.71147060 3.99487448 0 0 58
-7.95080233 -12.71551895 3.99554968 0 0 59
-7.90747023 -12.72285557 4.00245953 0 0 60
-6.51314878 -12.42655468 4.23547077 0 0 61
-6.53961611 -12.42814255 4.23229837 0 0 60
-6.58030653 -12.42969418 4.22517824 0 0 60
-6.62163305 -12.43223381 4.21374702 0 0 61
-6.64373827 -12.43319321 4.21489000 0 0 62
-6.67645121 -12.43548393 4.20584345 0 0 65
-6.71368647 -12.43738556 4.19968796 0 0 65
-6.74445868 -12.43909740 4.19532442 0 0 63
-6.76608229 -12.44058323 4.19141531 0 0 63
-6.80143118 -12.44240952 4.18682051 0 0 61
-6.83382559 -12.44420433 4.17993402 0 0 59
-6.85983801 -12.44667625 4.17689800 0 0 59
-6.89550352 -12.44899559 4.17014456 0 0 59
-6.90850973 -12.45023251 4.16862583 0 0 59
-6.93125010 -12.45217705 4.16545153 0 0 59
-6.97149134 -12.45461273 4.15846968 0 0 59
-7.00204802 -12.45683765 4.15001965 0 0 60
-7.01212931 -12.45840073 4.15139246 0 0 59
-7.04555845 -12.45979691 4.14317465 0 0 59
-7.06888437 -12.46222401 4.13880730 0 0 59
-7.08835077 -12.46364880 4.13549852 0 0 57
-7.11409807 -12.46612835 4.13149977 0 0 56
-7.14011240 -12.46859741 4.12846136 0 0 56
-7.15931463 -12.47003078 4.12419033 0 0 56
-7.18160295 -12.47286129 4.12115335 0 0 56
-7.20519114 -12.47527695 4.11775064 0 0 56
-7.22120428 -12.47704601 4.11540270 0 0 57
-7.23936987 -12.47887802 4.11246061 0 0 57
-7.26250982 -12.48217583 4.10919142 0 0 57
-7.28282785 -12.48407173 4.10565519 0 0 56
-7.29884195 -12.48584270 4.10330629 0 0 57
-7.33115244 -12.48677635 4.09435606 0 0 57
-7.35102034 -12.48955345 4.09095287 0 0 59
-7.35719442 -12.49234200 4.09342098 0 0 59
-7.38734961 -12.49321651 4.08506632 0 0 58
-7.40721846 -12.49599171 4.08166218 0 0 57
-7.42623377 -12.49829578 4.07848883 0 0 57
-7.44120836 -12.50046253 4.07747126 0 0 57
-7.45591784 -12.50264359 4.07549286 0 0 56
-7.47381544 -12.50448513 4.07158613 0 0 56
-7.48964262 -12.50712585 4.07033777 0 0 56
-7.50839090 -12.50943947 4.06620169 0 0 56
-7.52440310 -12.51121140 4.06385517 0 0 55
-7.54211378 -12.51392078 4.06104803 0 0 55
-7.55682230 -12.51610088 4.05906725 0 0 55
-7.57153273 -12.51828098 4.05708885 0 0 56
-7.58754587 -12.52005005 4.05474281 0 0 58
-7.61855268 -12.52139378 4.04615784 0 0 59
-7.61839342 -12.52536201 4.04935884 0 0 57
-7.64724779 -12.52664566 4.04136944 0 0 57
-7.66195917 -12.52882385 4.03939199 0 0 57
-7.67294168 -12.53135872 4.03740740 0 0 58
-7.68549395 -12.53347683 4.03602457 0 0 59
-7.69562674 -12.53554153 4.03427458 0 0 58
-7.71203661 -12.53866386 4.03183317 0 0 56
-7.72544050 -12.54125404 4.03021955 0 0 55
-7.73772860 -12.54337883 4.02787304 0 0 54
-7.75374079 -12.54514885 4.02552605 0 0 54
-7.76342154 -12.54809380 4.02391195 0 0 54
-7.77467012 -12.55062103 4.02289295 0 0 54
-7.80285883 -12.55056190 4.01403666 0 0 54
-7.79879141 -12.55575466 4.01833391 0 0 54
-7.82940149 -12.55574703 4.00984621 0 0 54
-7.83634424 -12.55815125 4.01002216 0 0 55
-7.84903002 -12.56163025 4.00757933 0 0 55
-7.85831404 -12.56322289 4.00605965 0 0 56
-7.87386942 -12.56587315 4.00385094 0 0 57
-7.88355112 -12.56881905 4.00223207 0 0 58
-7.89153147 -12.57082176 4.00108099 0 0 58
-7.89559984 -12.57405376 4.00102520 0 0 60
-7.91264963 -12.57542419 3.99734974 0 0 61
-7.91698313 -12.57864571 3.99825668 0 0 62
-7.92769861 -12.58119202 3.99531221 0 0 64
-7.93980169 -12.58419037 3.99406433 0 0 65
-7.94477320 -12.58565903 3.99373960 0 0 64
-7.95661020 -12.58866692 3.99152708 0 0 62
-7.95982885 -12.59142590 3.99170446 0 0 61
-7.98240709 -12.59164810 3.98440647 0 0 61
-7.99365664 -12.59417725 3.98338795 0 0 61
-7.99517298 -12.59599113 3.98402786 0 0 60
-8.01517105 -12.60013008 3.97956038 0 0 60
-8.01317596 -12.60452652 3.98120213 0 0 59
-8.01788521 -12.60600471 3.97990990 0 0 58
-8.02495766 -12.60977364 3.97902822 0 0 58
-8.02817535 -12.61252975 3.97920275 0 0 58
-8.02897263 -12.61523819 3.97901154 0 0 58
-8.03793335 -12.61907578 3.97656727 0 0 58
-8.04075241 -12.62048149 3.97683907 0 0 58
-8.04572678 -12.62194824 3.97651339 0 0 58
-8.04804039 -12.62647057 3.97695780 0 0 57
-8.05705643 -12.62807274 3.97447634 0 0 56
-8.05505943 -12.63247108 3.97611475 0 0 56
-8.05976677 -12.63394928 3.97482395 0 0 56
-8.06311798 -12.63807297 3.97393990 0 0 57
-8.07683945 -12.64115429 3.97016716 0 0 56
-8.07341194 -12.64459610 3.97323227 0 0 56
-8.08391190 -12.64492226 3.96928358 0 0 56
-8.09835434 -12.64710999 3.96634054 0 0 56
-8.08765984 -12.65039253 3.96830320 0 0 56
-8.09760857 -12.65333176 3.96765280 0 0 56
-8.09396172 -12.65728760 3.96663046 0 0 56
-8.11401176 -12.65919304 3.96212816 0 0 56
-8.08805656 -12.66291523 3.96936750 0 0 57
-8.08122063 -12.66720963 3.97027206 0 0 57
-8.08613968 -12.67091274 3.96998644 0 0 58
-8.06507492 -12.67524052 3.97483730 0 0 59
-8.08597565 -12.67761421 3.97010326 0 0 58
-8.08187866 -12.68245506 3.96921682 0 0 58
-8.09395218 -12.68235397 3.96586704 0 0 58
-8.08195305 -12.68605423 3.96819687 0 0 59
-8.08732796 -12.68887520 3.96777534 0 0 59
-8.03038406 -12.69982338 3.97953558 0 0 58
-8.06628609 -12.69903564 3.97164488 0 0 59
-8.00872803 -12.70640945 3.98249912 0 0 58
-8.01683998 -12.70977402 3.98028517 0 0 59
-7.97507811 -12.71668816 3.98779106 0 0 59
-7.92816019 -12.72301006 3.99672270 0 0 59
-7.95278978 -12.72502518 3.99198771 0 0 59
-6.51450109 -12.42664528 4.23198080 0 0 61
-6.53984880 -12.42777443 4.22807884 0 0 60
-6.58008909 -12.43020630 4.22109556 0 0 60
-6.62343645 -12.43144417 4.21012354 0 0 61
-6.64639616 -12.43287659 4.21103621 0 0 63
-6.67825460 -12.43469620 4.20222139 0 0 65
-6.71719313 -12.43754005 4.19560289 0 0 65
-6.74815130 -12.43838310 4.19014120 0 0 64
-6.76977396 -12.43986607 4.18623495 0 0 64
-6.80552053 -12.44304848 4.18154478 0 0 61
-6.83863401 -12.44395256 4.17548227 0 0 59
-6.86680269 -12.44648552 4.17185163 0 0 60
-6.90161753 -12.44833279 4.16532850 0 0 60
-6.91462183 -12.44956875 4.16381025 0 0 60
-6.93821573 -12.45198441 4.16040754 0 0 60
-6.97930574 -12.45489502 4.15319204 0 0 59
-7.00945807 -12.45576477 4.14484072 0 0 61
-7.01981401 -12.45731640 4.14717436 0 0 59
-7.05337477 -12.46007729 4.13789558 0 0 59
-7.07741880 -12.46161556 4.13435888 0 0 59
-7.09688425 -12.46303749 4.13104916 0 0 58
-7.12263441 -12.46551704 4.12704992 0 0 57
-7.14837885 -12.46799850 4.12304831 0 0 56
-7.17085314 -12.46995449 4.11891174 0 0 55
-7.19359541 -12.47190094 4.11573887 0 0 56
-7.21588373 -12.47472763 4.11270380 0 0 56
-7.23189402 -12.47649670 4.11035776 0 0 57
-7.24921083 -12.47785664 4.10764742 0 0 57
-7.27338457 -12.48075867 4.10304785 0 0 56
-7.29527330 -12.48223305 4.10010862 0 0 56
-7.30971289 -12.48442173 4.09716368 0 0 57
-7.34184027 -12.48622704 4.08930969 0 0 57
-7.36170626 -12.48900509 4.08590603 0 0 60
-7.36833429 -12.49091339 4.08823824 0 0 59
-7.39889002 -12.49313927 4.07978964 0 0 58
-7.42006063 -12.49550629 4.07601929 0 0 57
-7.43822527 -12.49733734 4.07307673 0 0 57
-7.45319891 -12.49950409 4.07206059 0 0 57
-7.46921301 -12.50127602 4.06971312 0 0 57
-7.48665667 -12.50399971 4.06594419 0 0 56
-7.50266981 -12.50576973 4.06360054 0 0 56
-7.52038336 -12.50848293 4.06078959 0 0 56
-7.53854799 -12.51031208 4.05784845 0 0 55
-7.55998564 -12.51266861 4.05503988 0 0 55
-7.57312536 -12.51526928 4.05246449 0 0 55
-7.58567667 -12.51738358 4.05108023 0 0 57
-7.60038328 -12.51956367 4.04910040 0 0 59
-7.63054323 -12.52043533 4.04074526 0 0 59
-7.63083792 -12.52352333 4.04381323 0 0 58
-7.66399813 -12.52493095 4.03462934 0 0 57
-7.67610025 -12.52792740 4.03338051 0 0 57
-7.68538523 -12.52952099 4.03186274 0 0 58
-7.69748640 -12.53251457 4.03061390 0 0 57
-7.71003962 -12.53463554 4.02922964 0 0 56
-7.72748613 -12.53736115 4.02545881 0 0 55
-7.74089193 -12.53994560 4.02384472 0 0 54
-7.75560045 -12.54212475 4.02186394 0 0 54
-7.77246141 -12.54436779 4.01928711 0 0 54
-7.78174257 -12.54595947 4.01776838 0 0 54
-7.79227495 -12.54938030 4.01592398 0 0 54
-7.82072878 -12.54930687 4.00802851 0 0 54
-7.81581259 -12.55403042 4.01255989 0 0 54
-7.84727335 -12.55449486 4.00383854 0 0 54
-7.85291147 -12.55730629 4.00438166 0 0 54
-7.86690187 -12.56037712 4.00157309 0 0 55
-7.87533331 -12.56149673 4.00028372 0 0 56
-7.89147520 -12.56463051 3.99687767 0 0 57
-7.90142202 -12.56756783 3.99622774 0 0 57
-7.91070509 -12.56915855 3.99470663 0 0 57
-7.91477251 -12.57238960 3.99465132 0 0 59
-7.92921305 -12.57457924 3.99170828 0 0 61
-7.93588877 -12.57699203 3.99092197 0 0 62
-7.94602060 -12.57905674 3.98917150 0 0 64
-7.95655584 -12.58247375 3.98732471 0 0 66
-7.96022558 -12.58435249 3.98736382 0 0 66
-7.97362947 -12.58694077 3.98575068 0 0 64
-7.97769880 -12.59016991 3.98569536 0 0 62
-8.00112915 -12.59086990 3.97816801 0 0 62
-8.01282883 -12.59251213 3.97701502 0 0 61
-8.01650047 -12.59438896 3.97705507 0 0 60
-8.03434563 -12.59846783 3.97318745 0 0 61
-8.03926468 -12.60217094 3.97290182 0 0 59
-8.04266930 -12.60405827 3.97197723 0 0 58
-8.04759026 -12.60775948 3.97169352 0 0 57
-8.04995728 -12.61004829 3.97209692 0 0 58
-8.05290985 -12.61281872 3.97130823 0 0 57
-8.06298637 -12.61711884 3.96959734 0 0 57
-8.06468773 -12.61806202 3.96913719 0 0 57
-8.06920815 -12.62040901 3.96894503 0 0 57
-8.07067108 -12.62446213 3.96962214 0 0 56
-8.08210754 -12.62611389 3.96750641 0 0 56
-8.08056641 -12.62963200 3.96900892 0 0 56
-8.08612251 -12.63158035 3.96748924 0 0 56
-8.09378052 -12.63582897 3.96540880 0 0 56
-8.10449982 -12.63837910 3.96246672 0 0 56
-8.10106850 -12.64181900 3.96552753 0 0 56
-8.11112022 -12.64302540 3.96171665 0 0 56
-8.12601089 -12.64433289 3.95863819 0 0 56
-8.11486816 -12.64850140 3.96073914 0 0 56
-8.12800407 -12.65110016 3.95815897 0 0 56
-8.12834930 -12.65468788 3.95810509 0 0 55
-8.14943695 -12.65619373 3.95227146 0 0 56
-8.12504959 -12.65949631 3.96010876 0 0 56
-8.11449051 -12.66414642 3.96101284 0 0 56
-8.11810684 -12.66825676 3.96109200 0 0 57
-8.09573746 -12.67299652 3.96630955 0 0 58
-8.12055016 -12.67414379 3.96047640 0 0 57
-8.11645126 -12.67898178 3.95958996 0 0 58
-8.13009644 -12.67846489 3.95684004 0 0 58
-8.11849594 -12.68351460 3.95907354 0 0 58
-8.12405396 -12.68546581 3.95755434 0 0 58
-8.07344055 -12.69523811 3.96858120 0 0 59
-8.10673714 -12.69527054 3.96142483 0 0 58
-8.06067085 -12.70205975 3.97012091 0 0 59
-8.06950188 -12.70453453 3.96873665 0 0 59
-8.03896332 -12.71088123 3.97312450 0 0 59
-7.99446535 -12.71725082 3.98242140 0 0 59
-8.01191521 -12.71997356 3.97865105 0 0 59
-7.95605421 -12.72828865 3.98904181 0 0 58
-7.99860811 -12.72681808 3.97826242 0 0 58
-6.51630735 -12.42585945 4.22835970 0 0 61
-6.53962946 -12.42828751 4.22399473 0 0 60
-6.58059072 -12.42982864 4.21783972 0 0 60
-6.62478876 -12.43153954 4.20663595 0 0 61
-6.64833212 -12.43345261 4.20635509 0 0 63
-6.67934084 -12.43480015 4.19776869 0 0 65
-6.72115183 -12.43681335 4.19138622 0 0 64
-6.75080729 -12.43806458 4.18628836 0 0 64
-6.77269793 -12.43954086 4.18334627 0 0 64
-6.80948114 -12.44232082 4.17732620 0 0 62
-6.84317636 -12.44371033 4.17006969 0 0 60
-6.87187815 -12.44622040 4.16836643 0 0 60
-6.90754271 -12.44854259 4.16161203 0 0 61
-6.91943121 -12.44931602 4.15935946 0 0 61
-6.94459486 -12.45131302 4.15655375 0 0 60
-6.98698950 -12.45380783 4.14897490 0 0 60
-7.01557684 -12.45510292 4.14002323 0 0 61
-7.02632475 -12.45800686 4.14226294 0 0 60
-7.06106043 -12.45899582 4.13367796 0 0 59
-7.08438158 -12.46142197 4.12931108 0 0 59
-7.10515642 -12.46243668 4.12563753 0 0 59
-7.13004827 -12.46444511 4.12186766 0 0 58
-7.15691233 -12.46738529 4.11860085 0 0 56
-7.18068933 -12.46893406 4.11409569 0 0 56
-7.20297861 -12.47176170 4.11106253 0 0 57
-7.22571802 -12.47370720 4.10788679 0 0 56
-7.24061251 -12.47501659 4.10481119 0 0 56
-7.25832605 -12.47772980 4.10200262 0 0 57
-7.28537416 -12.47979927 4.09763670 0 0 56
-7.30654383 -12.48216534 4.09386492 0 0 56
-7.32125425 -12.48434639 4.09188366 0 0 57
-7.35298204 -12.48479843 4.08413076 0 0 58
-7.37239695 -12.48845482 4.08085966 0 0 60
-7.37771845 -12.49077415 4.08356190 0 0 59
-7.41087866 -12.49218178 4.07437897 0 0 57
-7.43205023 -12.49454594 4.07060862 0 0 58
-7.44891500 -12.49678802 4.06803131 0 0 57
-7.46519136 -12.49854660 4.06664705 0 0 57
-7.48205423 -12.50078773 4.06407070 0 0 57
-7.50022078 -12.50261879 4.06112957 0 0 56
-7.51551199 -12.50528336 4.05795670 0 0 56
-7.53452826 -12.50758457 4.05478287 0 0 56
-7.55426455 -12.50899696 4.05243587 0 0 56
-7.57413149 -12.51177216 4.04903269 0 0 57
-7.58753633 -12.51436234 4.04741907 0 0 57
-7.59897089 -12.51601791 4.04530382 0 0 58
-7.61453199 -12.51866722 4.04309225 0 0 59
-7.64338541 -12.51995087 4.03510427 0 0 58
-7.64368200 -12.52303505 4.03816605 0 0 58
-7.67684412 -12.52444267 4.02898502 0 0 58
-7.68894148 -12.52743912 4.02773905 0 0 57
-7.69822741 -12.52903366 4.02621889 0 0 57
-7.71293497 -12.53121376 4.02423906 0 0 56
-7.72679281 -12.53291893 4.02249002 0 0 55
-7.74450541 -12.53563309 4.01968288 0 0 55
-7.75875902 -12.53869438 4.01783657 0 0 54
-7.77320051 -12.54088593 4.01489210 0 0 54
-7.78921366 -12.54265404 4.01254940 0 0 56
-7.79934549 -12.54471684 4.01079988 0 0 55
-7.80929422 -12.54765415 4.01014805 0 0 54
-7.83774900 -12.54758072 4.00225496 0 0 54
-7.83471918 -12.55237770 4.00522137 0 0 54
-7.86402464 -12.55278111 3.99709749 0 0 54
-7.86966562 -12.55559158 3.99764013 0 0 54
-7.88365221 -12.55866241 3.99483013 0 0 55
-7.89320326 -12.56024551 3.99427605 0 0 55
-7.90719175 -12.56331635 3.99146795 0 0 56
-7.91817713 -12.56585312 3.98948717 0 0 57
-7.92942667 -12.56838036 3.98846722 0 0 57
-7.93310022 -12.57025433 3.98850918 0 0 58
-7.94623137 -12.57285500 3.98593187 0 0 60
-7.95245695 -12.57614803 3.98528099 0 0 61
-7.96258974 -12.57821083 3.98352957 0 0 62
-7.97442484 -12.58122063 3.98131800 0 0 64
-7.97679090 -12.58350945 3.98172379 0 0 65
-7.98992777 -12.58610725 3.97914600 0 0 64
-7.99687338 -12.58850861 3.97932339 0 0 62
-8.02029991 -12.58920479 3.97179317 0 0 61
-8.03088570 -12.59039021 3.96990776 0 0 62
-8.03495407 -12.59362030 3.96985388 0 0 60
-8.05351830 -12.59680557 3.96681404 0 0 61
-8.05928993 -12.60098076 3.96629858 0 0 60
-8.06399536 -12.60245895 3.96500826 0 0 59
-8.07152367 -12.60534096 3.96398878 0 0 57
-8.07128143 -12.60844803 3.96512890 0 0 58
-8.07553864 -12.61080742 3.96397209 0 0 57
-8.08691788 -12.61469650 3.96189642 0 0 56
-8.08974075 -12.61610222 3.96216917 0 0 56
-8.09426117 -12.61845398 3.96197748 0 0 56
-8.09460258 -12.62203979 3.96191931 0 0 56
-8.10688972 -12.62416744 3.95957327 0 0 56
-8.10535240 -12.62768364 3.96107721 0 0 56
-8.11117554 -12.62962151 3.96052027 0 0 56
-8.12013435 -12.63346100 3.95807552 0 0 56
-8.13143539 -12.63648987 3.95393944 0 0 56
-8.12957573 -12.63951397 3.95760012 0 0 56
-8.13962936 -12.64071941 3.95378637 0 0 56
-8.15497398 -12.64114380 3.95057297 0 0 56
-8.14382935 -12.64531136 3.95267105 0 0 56
-8.15938568 -12.64796162 3.95046234 0 0 56
-8.16161728 -12.65162468 3.94884443 0 0 56
-8.18055344 -12.65306854 3.94360828 0 0 57
-8.16047478 -12.65649414 3.95025253 0 0 56
-8.15148354 -12.66072464 3.95175409 0 0 56
-8.15509987 -12.66483688 3.95183372 0 0 56
-8.12900734 -12.66993523 3.95704889 0 0 57
-8.15754509 -12.67072487 3.95121813 0 0 57
-8.15429688 -12.67603493 3.95010233 0 0 58
-8.16879272 -12.67598915 3.94711685 0 0 58
-8.15679359 -12.67968464 3.94944811 0 0 58
-8.16450691 -12.68169785 3.94733095 0 0 57
-8.11258888 -12.69187927 3.95872545 0 0 58
-8.14719009 -12.69150352 3.95119953 0 0 57
-8.10372543 -12.69747353 3.95917034 0 0 58
-8.11582947 -12.70047188 3.95792103 0 0 59
-8.09032059 -12.70604897 3.96194172 0 0 59
-8.05358887 -12.71219730 3.96908236 0 0 59
-8.06933403 -12.71397972 3.96577311 0 0 60
-8.00211716 -12.72423744 3.97726011 0 0 59
-8.05472565 -12.72123337 3.96575117 0 0 59
-6.51739264 -12.42596436 4.22390938 0 0 61
-6.53883028 -12.42831802 4.22110319 0 0 60
-6.57952166 -12.42987442 4.21398258 0 0 60
-6.62502432 -12.43117428 4.20241690 0 0 61
-6.65013456 -12.43266487 4.20273256 0 0 63
-6.68069410 -12.43489361 4.19428205 0 0 64
-6.72223806 -12.43692017 4.18693399 0 0 64
-6.75301218 -12.43863297 4.18256807 0 0 63
-6.77593470 -12.43970680 4.17829847 0 0 64
-6.81298590 -12.44247818 4.17323971 0 0 63
-6.84668303 -12.44386673 4.16598654 0 0 61
-6.87641954 -12.44597721 4.16295004 0 0 60
-6.91235209 -12.44828606 4.15716076 0 0 61
-6.92424059 -12.44906044 4.15491247 0 0 61
-6.95155764 -12.45111847 4.15150785 0 0 60
-6.99264956 -12.45402813 4.14429522 0 0 61
-7.02150393 -12.45531178 4.13630581 0 0 61
-7.03244066 -12.45734406 4.13744688 0 0 60
-7.06802034 -12.45880318 4.12863159 0 0 60
-7.09179831 -12.46035004 4.12413073 0 0 59
-7.11238432 -12.46223450 4.12155485 0 0 59
-7.13701391 -12.46425438 4.11682081 0 0 58
-7.16603136 -12.46725655 4.11295652 0 0 56
-7.18765116 -12.46874332 4.10905266 0 0 56
-7.20909262 -12.47109795 4.10624552 0 0 57
-7.23528910 -12.47269630 4.10211134 0 0 56
-7.24999666 -12.47487640 4.10012865 0 0 56
-7.26816225 -12.47670937 4.09718943 0 0 56
-7.29821634 -12.47931290 4.09199429 0 0 56
-7.31853437 -12.48120785 4.08845425 0 0 57
-7.33324480 -12.48338318 4.08647490 0 0 57
-7.36340189 -12.48426056 4.07811928 0 0 59
-7.38223124 -12.48743629 4.07604408 0 0 60
-7.38840723 -12.49022484 4.07851505 0 0 59
-7.42372370 -12.49169350 4.06873560 0 0 58
-7.44404268 -12.49359035 4.06519699 0 0 58
-7.46090460 -12.49582863 4.06262064 0 0 58
-7.47673368 -12.49847031 4.06137228 0 0 57
-7.49404478 -12.49983215 4.05866003 0 0 57
-7.51436663 -12.50172424 4.05512094 0 0 56
-7.52992296 -12.50437355 4.05290985 0 0 56
-7.54894018 -12.50667763 4.04973793 0 0 56
-7.56795931 -12.50898170 4.04656267 0 0 57
-7.58612299 -12.51081467 4.04362059 0 0 59
-7.59952974 -12.51340294 4.04200649 0 0 59
-7.61181593 -12.51552963 4.03965998 0 0 58
-7.62782621 -12.51729965 4.03731489 0 0 58
-7.65968466 -12.51911736 4.02849817 0 0 57
-7.65782595 -12.52214050 4.03216028 0 0 58
-7.68798494 -12.52301216 4.02380514 0 0 57
-7.70250654 -12.52606392 4.02292395 0 0 56
-7.71349192 -12.52859879 4.02094269 0 0 56
-7.72864771 -12.52989674 4.01882696 0 0 55
-7.74309206 -12.53208351 4.01588631 0 0 55
-7.76080370 -12.53479767 4.01307917 0 0 55
-7.77636290 -12.53745461 4.01086664 0 0 55
-7.78891802 -12.53956604 4.00948381 0 0 55
-7.80335760 -12.54175472 4.00653934 0 0 57
-7.81461000 -12.54428291 4.00552225 0 0 57
-7.82474184 -12.54634857 4.00377035 0 0 54
-7.85404921 -12.54675007 3.99564791 0 0 54
-7.85173750 -12.55065536 3.99944639 0 0 54
-7.88189268 -12.55152702 3.99109125 0 0 54
-7.88838530 -12.55480957 3.99140072 0 0 54
-7.90152121 -12.55740929 3.98882341 0 0 55
-7.91080523 -12.55900192 3.98730421 0 0 55
-7.92420912 -12.56159019 3.98568964 0 0 56
-7.93734789 -12.56418800 3.98311377 0 0 56
-7.94617891 -12.56666374 3.98172903 0 0 57
-7.95069838 -12.56901169 3.98154068 0 0 58
-7.96384001 -12.57161331 3.97896051 0 0 59
-7.96875811 -12.57531357 3.97867489 0 0 59
-7.97934294 -12.57649803 3.97678947 0 0 60
-7.99229288 -12.57996750 3.97530890 0 0 62
-7.99354410 -12.58179283 3.97498274 0 0 63
-8.00825310 -12.58397293 3.97300291 0 0 63
-8.01447487 -12.58726406 3.97235203 0 0 61
-8.04077530 -12.58713150 3.96505594 0 0 61
-8.04960442 -12.58960533 3.96367168 0 0 61
-8.05412674 -12.59195614 3.96348000 0 0 60
-8.07269096 -12.59513950 3.96044159 0 0 61
-8.07630730 -12.59925270 3.96052122 0 0 61
-8.08316994 -12.60079193 3.95863485 0 0 59
-8.09069252 -12.60367584 3.95761871 0 0 58
-8.09346199 -12.60731888 3.95792818 0 0 58
-8.09713173 -12.60919476 3.95796728 0 0 57
-8.11112022 -12.61226654 3.95515871 0 0 56
-8.11322021 -12.61456490 3.95459986 0 0 56
-8.11774063 -12.61691380 3.95440912 0 0 56
-8.11835480 -12.62049198 3.95531511 0 0 56
-8.13109207 -12.62173843 3.95283318 0 0 56
-8.12928391 -12.62526512 3.95337534 0 0 56
-8.13510895 -12.62720108 3.95281982 0 0 56
-8.14622498 -12.63110352 3.94977808 0 0 56
-8.15935898 -12.63370419 3.94720030 0 0 56
-8.15651512 -12.63762951 3.94906998 0 0 56
-8.16571617 -12.63836098 3.94548845 0 0 56
-8.18218040 -12.63924789 3.94300795 0 0 57
-8.17364120 -12.64259720 3.94437361 0 0 56
-8.19004822 -12.64571953 3.94193125 0 0 57
-8.19013023 -12.64932060 3.94091415 0 0 57
-8.20690918 -12.65069962 3.93627405 0 0 59
-8.18898392 -12.65418816 3.94232035 0 0 58
-8.18587112 -12.65812683 3.94322634 0 0 57
-8.19182777 -12.66142845 3.94160891 0 0 57
-8.17057800 -12.66662979 3.94755888 0 0 56
-8.19454002 -12.66730309 3.94195938 0 0 59
-8.19128990 -12.67261505 3.94084024 0 0 58
-8.20493507 -12.67209721 3.93809080 0 0 59
-8.19724655 -12.67591858 3.93922377 0 0 58
-8.20607567 -12.67839432 3.93784046 0 0 58
-8.15631294 -12.68863678 3.94864273 0 0 57
-8.19397354 -12.68656063 3.94024897 0 0 57
-8.14575005 -12.69328499 3.94954395 0 0 57
-8.16189384 -12.69642067 3.94613791 0 0 58
-8.14141273 -12.70123291 3.94979334 0 0 58
-8.10598373 -12.70697021 3.95657158 0 0 59
-8.12343025 -12.70969296 3.95279884 0 0 59
-8.05823898 -12.71864891 3.96474981 0 0 60
-8.11384964 -12.71618080 3.95241308 0 0 59
-8.02373695 -12.72846031 3.97027206 0 0 60
-8.03620911 -12.72971630 3.96682835 0 0 61
-8.06578255 -12.73010635 3.95966768 0 0 61
-6.52004576 -12.42564774 4.22005510 0 0 60
-6.53775835 -12.42835999 4.21724796 0 0 61
-6.57760286 -12.42944145 4.21036005 0 0 60
-6.62480688 -12.43168640 4.19833183 0 0 61
-6.65148973 -12.43275738 4.19924402 0 0 64
-6.68007803 -12.43405342 4.19029284 0 0 63
-6.72358942 -12.43701172 4.18344593 0 0 63
-6.75566339 -12.43831635 4.17871428 0 0 62
-6.77859449 -12.43939209 4.17444372 0 0 64
-6.81694651 -12.44175148 4.16902304 0 0 63
-6.85018873 -12.44402122 4.16190290 0 0 61
-6.88149881 -12.44571304 4.15946436 0 0 61
-6.95682192 -12.44998837 4.14692450 0 0 61
-6.99791098 -12.45289421 4.13970900 0 0 61
-7.02846766 -12.45511818 4.13126040 0 0 61
-7.04012060 -12.45626068 4.13322735 0 0 61
-7.07413054 -12.45813942 4.12381697 0 0 61
-7.09903097 -12.46015167 4.12004852 0 0 59
-7.11934996 -12.46204472 4.11650658 0 0 58
-7.14424658 -12.46405220 4.11273813 0 0 57
-7.17456484 -12.46664619 4.10850763 0 0 56
-7.19506884 -12.46767044 4.10386896 0 0 56
-7.21735811 -12.47049713 4.10083246 0 0 57
-7.24467325 -12.47255802 4.09742975 0 0 56
-7.25911570 -12.47474670 4.09448481 0 0 56
-7.27885199 -12.47616196 4.09214258 0 0 55
-7.30805445 -12.47829437 4.08717918 0 0 57
-7.32922220 -12.48065948 4.08340979 0 0 57
-7.34393358 -12.48283577 4.08142710 0 0 57
-7.37278700 -12.48411942 4.07343864 0 0 60
-7.39135218 -12.48730469 4.07040167 0 0 59
-7.39927912 -12.48880577 4.07236958 0 0 58
-7.43486547 -12.49026299 4.06355476 0 0 58
-7.45472860 -12.49304104 4.06015205 0 0 59
-7.47289801 -12.49487305 4.05720949 0 0 58
-7.48872328 -12.49751186 4.05596066 0 0 57
-7.50603914 -12.49887276 4.05324841 0 0 57
-7.52720785 -12.50123692 4.04947853 0 0 57
-7.54322004 -12.50300789 4.04713297 0 0 58
-7.56223440 -12.50531006 4.04396057 0 0 57
-7.57994795 -12.50802422 4.04115248 0 0 58
-7.59680986 -12.51026535 4.03857517 0 0 60
-7.61040163 -12.51198292 4.03586197 0 0 60
-7.62595987 -12.51463509 4.03365278 0 0 59
-7.64066935 -12.51681328 4.03167295 0 0 58
-7.67383146 -12.51821899 4.02248907 0 0 58
-7.67197084 -12.52124405 4.02615309 0 0 58
-7.69997454 -12.52205658 4.01839399 0 0 56
-7.71534872 -12.52557373 4.01728010 0 0 55
-7.72893953 -12.52729225 4.01456928 0 0 55
-7.74625254 -12.52865219 4.01185751 0 0 55
-7.75880766 -12.53077126 4.01047659 0 0 55
-7.77652025 -12.53348351 4.00766420 0 0 55
-7.79050875 -12.53655434 4.00485706 0 0 55
-7.80090857 -12.53861046 4.00407219 0 0 55
-7.81534910 -12.54079819 4.00112915 0 0 57
-7.82660151 -12.54332352 4.00010920 0 0 58
-7.84131002 -12.54550362 3.99812841 0 0 55
-7.86976671 -12.54543114 3.99023867 0 0 55
-7.86830473 -12.54981041 3.99380255 0 0 54
-7.89734125 -12.55021954 3.98471785 0 0 55
-7.90383482 -12.55350113 3.98502684 0 0 55
-7.91854239 -12.55568218 3.98304749 0 0 55
-7.92737246 -12.55815792 3.98166561 0 0 55
-7.94266176 -12.56081867 3.97849035 0 0 56
-7.95521688 -12.56293488 3.97710752 0 0 56
-7.96404696 -12.56540966 3.97572184 0 0 57
-7.96856928 -12.56775856 3.97553205 0 0 57
-7.98170519 -12.57035828 3.97295380 0 0 57
-7.98793077 -12.57365036 3.97230196 0 0 57
-7.99721193 -12.57524490 3.97078228 0 0 58
-8.01016426 -12.57871437 3.96930218 0 0 61
-8.01141548 -12.58053970 3.96897602 0 0 61
-8.02612305 -12.58271790 3.96699381 0 0 62
-8.03495026 -12.58519268 3.96561241 0 0 61
-8.05864525 -12.58587933 3.95904636 0 0 62
-8.06877899 -12.58794308 3.95729637 0 0 61
-8.07329941 -12.59029102 3.95710611 0 0 60
-8.09029198 -12.59389973 3.95347071 0 0 60
-8.09436226 -12.59712791 3.95341301 0 0 60
-8.10234070 -12.59913349 3.95226049 0 0 59
-8.11072159 -12.60248756 3.95101309 0 0 58
-8.11524010 -12.60483551 3.95082235 0 0 58
-8.11975861 -12.60718441 3.95063114 0 0 57
-8.13375282 -12.61025620 3.94782305 0 0 56
-8.13611603 -12.61254501 3.94822931 0 0 56
-8.14037132 -12.61490345 3.94707584 0 0 56
-8.14098358 -12.61848259 3.94797945 0 0 56
-8.15457535 -12.62019920 3.94526911 0 0 56
-8.15218353 -12.62324333 3.94700193 0 0 56
-8.15989304 -12.62525558 3.94488478 0 0 56
-8.17473030 -12.62879753 3.94184542 0 0 58
-8.18760109 -12.63140869 3.93830633 0 0 58
-8.18417549 -12.63485336 3.94136763 0 0 57
-8.19337463 -12.63558197 3.93778801 0 0 58
-8.21042252 -12.63695335 3.93411112 0 0 58
-8.20084572 -12.64069939 3.93680811 0 0 58
-8.21770859 -12.64294243 3.93422985 0 0 59
-8.21778488 -12.64653969 3.93321085 0 0 59
-8.23326302 -12.64833355 3.92893744 0 0 60
-8.21533966 -12.65182114 3.93498564 0 0 59
-8.21483231 -12.65493679 3.93515921 0 0 59
-8.21948624 -12.65864944 3.93390894 0 0 59
-8.20515060 -12.66315651 3.93793297 0 0 58
-8.22389984 -12.66547394 3.93379831 0 0 60
-8.22240829 -12.66948891 3.93217707 0 0 60
-8.23474884 -12.66938305 3.92979193 0 0 60
-8.22948074 -12.67325592 3.93129539 0 0 60
-8.23804283 -12.67573929 3.92894697 0 0 60
-8.19936943 -12.68404770 3.93768549 0 0 58
-8.23312187 -12.68320274 3.93039370 0 0 59
-8.19181252 -12.68923569 3.93776226 0 0 57
-8.20652199 -12.69141483 3.93578529 0 0 59
-8.19034767 -12.69635010 3.93824720 0 0 59
-8.15994835 -12.70131969 3.94465780 0 0 58
-8.17608833 -12.70445442 3.94124985 0 0 59
-8.11565781 -12.71265507 3.95187426 0 0 59
-8.16996956 -12.71059418 3.93990183 0 0 59
-8.07724953 -12.72369289 3.95849466 0 0 59
-8.09017563 -12.72406483 3.95491314 0 0 59
-8.12693024 -12.72375298 3.94679213 0 0 59
-6.52440310 -12.42627525 4.21574068 0 0 59
-6.53368616 -12.42786789 4.21422243 0 0 61
-6.57607985 -12.43036652 4.20664072 0 0 60
-6.62315416 -12.43124580 4.19567204 0 0 61
-6.65041971 -12.43280220 4.19539118 0 0 65
-6.67882299 -12.43496609 4.18753767 0 0 63
-6.72467661 -12.43711758 4.17899466 0 0 61
-6.75675249 -12.43841934 4.17426395 0 0 61
-6.77994680 -12.43948555 4.17095757 0 0 63
-6.81960154 -12.44143677 4.16516876 0 0 62
-6.85414743 -12.44329453 4.15768290 0 0 61
-6.88518858 -12.44499683 4.15428162 0 0 62
-6.96163130 -12.44973278 4.14247274 0 0 61
-7.00272036 -12.45263863 4.13525915 0 0 61
-7.03457975 -12.45445728 4.12644386 0 0 61
-7.04708338 -12.45606995 4.12818241 0 0 61
-7.07979631 -12.45836067 4.11913347 0 0 61
-7.10468912 -12.46036720 4.11536503 0 0 60
-7.12631178 -12.46185303 4.11145973 0 0 58
-7.15120745 -12.46386147 4.10769033 0 0 57
-7.18283129 -12.46604538 4.10309410 0 0 56
-7.20445490 -12.46753120 4.09919167 0 0 57
-7.22719526 -12.46947765 4.09601593 0 0 57
-7.25163507 -12.47236443 4.09238291 0 0 57
-7.26764917 -12.47413635 4.09003830 0 0 56
-7.28954172 -12.47561264 4.08709621 0 0 55
-7.31717348 -12.47816372 4.08153486 0 0 57
-7.33775663 -12.48004723 4.07895899 0 0 58
-7.35507250 -12.48140812 4.07624912 0 0 59
-7.38132334 -12.48351097 4.06899214 0 0 60
-7.40249300 -12.48587704 4.06522036 0 0 59
-7.41127157 -12.48784637 4.06695938 0 0 58
-7.44470263 -12.48924446 4.05874014 0 0 59
-7.46541929 -12.49249268 4.05510473 0 0 59
-7.48358583 -12.49432182 4.05216265 0 0 58
-7.50071287 -12.49655342 4.05054998 0 0 58
-7.51973009 -12.49885750 4.04737520 0 0 58
-7.53919935 -12.50028038 4.04406786 0 0 58
-7.55390978 -12.50245857 4.04208803 0 0 59
-7.57507753 -12.50482559 4.03831768 0 0 58
-7.59193850 -12.50706768 4.03573990 0 0 59
-7.60795069 -12.50883484 4.03339386 0 0 60
-7.62265921 -12.51101494 4.03141689 0 0 61
-7.63795137 -12.51367474 4.02824163 0 0 60
-7.65481329 -12.51591873 4.02566481 0 0 58
-7.68366861 -12.51719856 4.01767635 0 0 58
-7.68396330 -12.52028656 4.02074003 0 0 58
-7.71412039 -12.52116013 4.01238680 0 0 55
-7.72994757 -12.52379704 4.01113653 0 0 55
-7.74308538 -12.52639961 4.00856066 0 0 55
-7.76066542 -12.52774811 4.00681162 0 0 56
-7.77510691 -12.52993584 4.00386763 0 0 55
-7.78981638 -12.53211689 4.00189018 0 0 55
-7.80321836 -12.53470421 4.00027657 0 0 55
-7.81420565 -12.53724098 3.99829435 0 0 55
-7.83106470 -12.53948212 3.99571705 0 0 56
-7.83989763 -12.54195595 3.99433279 0 0 57
-7.85787535 -12.54466057 3.99248981 0 0 56
-7.88391066 -12.54453659 3.98422956 0 0 57
-7.88460493 -12.54897499 3.98719883 0 0 55
-7.91305876 -12.54890537 3.97930670 0 0 56
-7.92085123 -12.55177879 3.97925329 0 0 55
-7.93484068 -12.55485058 3.97644520 0 0 55
-7.94412470 -12.55644417 3.97492504 0 0 55
-7.95968199 -12.55909348 3.97271347 0 0 56
-7.97066545 -12.56163025 3.97073126 0 0 56
-7.98106813 -12.56368256 3.96994400 0 0 57
-7.98513460 -12.56691647 3.96988964 0 0 57
-7.99957418 -12.56910324 3.96694469 0 0 57
-8.00737190 -12.57197762 3.96689129 0 0 56
-8.01723480 -12.57405090 3.96417952 0 0 57
-8.02776718 -12.57747078 3.96233368 0 0 59
-8.02973557 -12.57840443 3.96283531 0 0 59
-8.04372597 -12.58147430 3.96002436 0 0 61
-8.05282211 -12.58393860 3.95960379 0 0 61
-8.07494545 -12.58504486 3.95244217 0 0 61
-8.08579826 -12.58621597 3.95151854 0 0 61
-8.09162331 -12.58815861 3.95096397 0 0 61
-8.11188889 -12.59228706 3.94746351 0 0 60
-8.11550522 -12.59639931 3.94754362 0 0 59
-8.12281990 -12.59705925 3.94552088 0 0 59
-8.13119507 -12.60041428 3.94427347 0 0 59
-8.13526535 -12.60364532 3.94421768 0 0 58
-8.14023972 -12.60511208 3.94389248 0 0 57
-8.15593147 -12.60912895 3.94062185 0 0 57
-8.16005325 -12.61012268 3.94052792 0 0 57
-8.16300201 -12.61289310 3.93973827 0 0 56
-8.16491890 -12.61606407 3.94028044 0 0 56
-8.17850876 -12.61778069 3.93756723 0 0 56
-8.17696762 -12.62129402 3.93906927 0 0 56
-8.18494415 -12.62329674 3.93791676 0 0 57
-8.19762802 -12.62677765 3.93547487 0 0 60
-8.21265411 -12.62944984 3.93133497 0 0 61
-8.21183205 -12.63207340 3.93366718 0 0 60
-8.22057915 -12.63368702 3.93022251 0 0 60
-8.23461914 -12.63452339 3.92737389 0 0 62
-8.22693443 -12.63834476 3.92850828 0 0 60
-8.23903465 -12.64134121 3.92726088 0 0 62
-8.24126625 -12.64500427 3.92564392 0 0 61
-8.25674248 -12.64679146 3.92137003 0 0 62
-8.24084473 -12.64897919 3.92788076 0 0 61
-8.23988342 -12.65298080 3.92819023 0 0 62
-8.24453735 -12.65669346 3.92693949 0 0 61
-8.23065376 -12.66031837 3.93082905 0 0 60
-8.24783325 -12.66305065 3.92609549 0 0 61
-8.25006294 -12.66671181 3.92447758 0 0 61
-8.26110268 -12.66701317 3.92245865 0 0 61
-8.25687218 -12.67048836 3.92263031 0 0 61
-8.26570320 -12.67296124 3.92124701 0 0 60
-8.23349190 -12.68145847 3.92819548 0 0 59
-8.26293182 -12.68048668 3.92209578 0 0 60
-8.23253250 -12.68545914 3.92850685 0 0 59
-8.24351501 -12.68799496 3.92652225 0 0 60
-8.22949791 -12.69299126 3.92838907 0 0 60
-8.20627975 -12.69725990 3.93383932 0 0 59
-8.22130013 -12.69993019 3.92970133 0 0 60
-8.17217827 -12.70841980 3.93926668 0 0 59
-8.21975517 -12.70618439 3.92812300 0 0 60
-8.13897896 -12.71782207 3.94442463 0 0 59
-8.15517616 -12.71872044 3.94097996 0 0 59
-8.19453812 -12.71758842 3.93212652 0 0 59
-8.10077477 -12.73381996 3.94896555 0 0 61
-6.52915812 -12.42825508 4.21132946 0 0 61
-6.57285929 -12.43034458 4.20338297 0 0 60
-6.61993170 -12.43122387 4.19241285 0 0 61
-6.64935350 -12.43284416 4.19153547 0 0 65
-6.67775297 -12.43500900 4.18368244 0 0 62
-6.72432470 -12.43626690 4.17596960 0 0 60
-6.75810289 -12.43851471 4.17077589 0 0 61
-6.78102922 -12.43958855 4.16650486 0 0 62
-6.82068586 -12.44154263 4.16071701 0 0 62
-6.85680342 -12.44297886 4.15382910 0 0 62
-6.88869429 -12.44515419 4.15019655 0 0 63
-7.00752974 -12.45238495 4.13080740 0 0 61
-7.03939009 -12.45420361 4.12199259 0 0 61
-7.05319834 -12.45540810 4.12336731 0 0 62
-7.08505678 -12.45722485 4.11455011 0 0 61
-7.11080408 -12.45970345 4.11054850 0 0 60
-7.13269186 -12.46117973 4.10760832 0 0 59
-7.15947676 -12.46326160 4.10227633 0 0 58
-7.18979406 -12.46585464 4.09804773 0 0 57
-7.21383905 -12.46739197 4.09451056 0 0 58
-7.23546267 -12.46887684 4.09060526 0 0 58
-7.26017237 -12.47175694 4.08793592 0 0 57
-7.27663469 -12.47264194 4.08545256 0 0 56
-7.30041265 -12.47418976 4.08095121 0 0 56
-7.32570601 -12.47755241 4.07708502 0 0 58
-7.34687662 -12.47992039 4.07331610 0 0 59
-7.36288977 -12.48168659 4.07096958 0 0 60
-7.38958979 -12.48290634 4.06357813 0 0 59
-7.41402960 -12.48579788 4.05994463 0 0 59
-7.42280912 -12.48776722 4.06168175 0 0 59
-7.45382166 -12.48911381 4.05309534 0 0 59
-7.47498751 -12.49147797 4.04932785 0 0 59
-7.49557638 -12.49336433 4.04674911 0 0 58
-7.51270533 -12.49559593 4.04513788 0 0 58
-7.53217459 -12.49701500 4.04182863 0 0 58
-7.54988813 -12.49972916 4.03902102 0 0 59
-7.56504965 -12.50102806 4.03690481 0 0 59
-7.58576632 -12.50427628 4.03327179 0 0 60
-7.60281324 -12.50564575 4.02959681 0 0 59
-7.61949015 -12.50875854 4.02811718 0 0 60
-7.63308096 -12.51047897 4.02540541 0 0 60
-7.64994383 -12.51271820 4.02282858 0 0 60
-7.66837835 -12.51453972 4.02085018 0 0 58
-7.69565821 -12.51624489 4.01226330 0 0 57
-7.69510317 -12.51885414 4.01555681 0 0 57
-7.72768164 -12.51977921 4.00757074 0 0 55
-7.74409246 -12.52290344 4.00513029 0 0 54
-7.75664568 -12.52502060 4.00374794 0 0 55
-7.77135420 -12.52719879 4.00176764 0 0 56
-7.78709936 -12.52898026 3.99845552 0 0 56
-7.80180597 -12.53115845 3.99647665 0 0 55
-7.81821680 -12.53427982 3.99403524 0 0 55
-7.82991838 -12.53592491 3.99288416 0 0 55
-7.84651613 -12.53817749 3.98934412 0 0 56
-7.85561323 -12.54064178 3.98892164 0 0 57
-7.87116957 -12.54329109 3.98671150 0 0 57
-7.89805555 -12.54364014 3.97822189 0 0 57
-7.90032053 -12.54766083 3.98178720 0 0 56
-7.92850637 -12.54759789 3.97293043 0 0 57
-7.93742037 -12.55093575 3.97360992 0 0 56
-7.95055914 -12.55353165 3.97103453 0 0 56
-7.95938635 -12.55600643 3.96964741 0 0 56
-7.97539759 -12.55777550 3.96730185 0 0 56
-7.98638105 -12.56031227 3.96532059 0 0 56
-7.99736547 -12.56284904 3.96334267 0 0 57
-8.00273514 -12.56567192 3.96291971 0 0 56
-8.01789856 -12.56696892 3.96080351 0 0 56
-8.02497101 -12.57073593 3.95992041 0 0 56
-8.03555870 -12.57192039 3.95803690 0 0 57
-8.04694176 -12.57580757 3.95595789 0 0 58
-8.04891014 -12.57674217 3.95646048 0 0 58
-8.06074333 -12.57974815 3.95424843 0 0 59
-8.06853867 -12.58262253 3.95419216 0 0 60
-8.09066010 -12.58372879 3.94703007 0 0 60
-8.10366821 -12.58496380 3.94551086 0 0 60
-8.10949326 -12.58690453 3.94495726 0 0 61
-8.13452148 -12.59027863 3.94012785 0 0 61
-8.13728523 -12.59391785 3.94043779 0 0 60
-8.14499474 -12.59592915 3.93832111 0 0 60
-8.15167236 -12.59834194 3.93753576 0 0 59
-8.15489006 -12.60110092 3.93770790 0 0 58
-8.16156960 -12.60351086 3.93692160 0 0 58
-8.17882729 -12.60710621 3.93424892 0 0 58
-8.18138123 -12.60852432 3.93355799 0 0 58
-8.18589973 -12.61087227 3.93336630 0 0 58
-8.18997192 -12.61410236 3.93330860 0 0 57
-8.20356178 -12.61581993 3.93059683 0 0 58
-8.20201874 -12.61933708 3.93210030 0 0 58
-8.20887756 -12.62087727 3.93021536 0 0 59
-8.21810532 -12.62470627 3.92873621 0 0 62
-8.22940636 -12.62773323 3.92459536 0 0 64
-8.23100471 -12.63040924 3.92729425 0 0 64
-8.23975182 -12.63202286 3.92384863 0 0 64
-8.25249100 -12.63327026 3.92136526 0 0 64
-8.24897957 -12.63585186 3.92236948 0 0 63
-8.25735855 -12.63920784 3.92111874 0 0 63
-8.26089096 -12.64245987 3.91913748 0 0 62
-8.27721977 -12.64472103 3.91463232 0 0 62
-8.26347351 -12.64697075 3.92054319 0 0 62
-8.25879097 -12.65132713 3.92085314 0 0 62
-8.26716805 -12.65468216 3.91960382 0 0 61
-8.25328636 -12.65830708 3.92349339 0 0 60
-8.27333641 -12.66021156 3.91899014 0 0 60
-8.27484894 -12.66476631 3.91654634 0 0 60
-8.28633881 -12.66418266 3.91439056 0 0 60
-8.28452873 -12.66770935 3.91493130 0 0 60
-8.29466438 -12.66977501 3.91318178 0 0 60
-8.26272011 -12.67825890 3.92109156 0 0 60
-8.29189491 -12.67729950 3.91402912 0 0 60
-8.26319695 -12.68321419 3.91997480 0 0 60
-8.27633476 -12.68581390 3.91739893 0 0 60
-8.26433754 -12.68951035 3.91972780 0 0 60
-8.24412346 -12.69431114 3.92434931 0 0 60
-8.26045036 -12.69657135 3.91984367 0 0 60
-8.22026062 -12.70306778 3.92794847 0 0 60
-8.26308250 -12.70158958 3.91813278 0 0 60
-8.19725227 -12.71229649 3.93131590 0 0 59
-8.21389771 -12.71231270 3.92773581 0 0 59
-8.25065613 -12.71199989 3.91961527 0 0 59
-8.08979416 -12.73128605 3.95094633 0 0 61
-8.15604401 -12.72776318 3.93668318 0 0 59
-8.13426018 -12.73298645 3.94070768 0 0 60
-6.52463198 -12.42864418 4.20843649 0 0 61
-6.56963682 -12.43032455 4.20012712 0 0 60
-6.61625433 -12.43208313 4.18929148 0 0 60
-6.64743090 -12.43241310 4.18791246 0 0 65
-6.67452860 -12.43498993 4.18042564 0 0 62
-6.72437429 -12.43676949 4.17285013 0 0 59
-6.75748491 -12.43767166 4.16678762 0 0 60
-6.78153181 -12.43920994 4.16324949 0 0 62
-6.82203722 -12.44163418 4.15722942 0 0 61
-6.85815668 -12.44307423 4.15034246 0 0 61
-6.89220381 -12.44531059 4.14611197 0 0 63
-7.01234102 -12.45213318 4.12635994 0 0 60
-7.04419851 -12.45394993 4.11754322 0 0 61
-7.05800772 -12.45515251 4.11891413 0 0 61
-7.09071684 -12.45744324 4.10986805 0 0 60
-7.11718035 -12.45903015 4.10669851 0 0 59
-7.13965845 -12.46098900 4.10256147 0 0 58
-7.16670656 -12.46306038 4.09819603 0 0 58
-7.19747877 -12.46477318 4.09383059 0 0 58
-7.21910143 -12.46625710 4.08992720 0 0 58
-7.24269342 -12.46867371 4.08651972 0 0 58
-7.26843882 -12.47115707 4.08252192 0 0 57
-7.28575373 -12.47251511 4.07980967 0 0 57
-7.30849314 -12.47446156 4.07663774 0 0 57
-7.33423948 -12.47694016 4.07263756 0 0 58
-7.35586214 -12.47842407 4.06873226 0 0 59
-7.37142038 -12.48107624 4.06651926 0 0 60
-7.39897490 -12.48276901 4.05889750 0 0 58
-7.42301607 -12.48430538 4.05536079 0 0 59
-7.43349791 -12.48722267 4.05663633 0 0 59
-7.46450567 -12.48856544 4.04804945 0 0 59
-7.48482752 -12.49046135 4.04450893 0 0 58
-7.50626421 -12.49281693 4.04170370 0 0 58
-7.52312708 -12.49505806 4.03912687 0 0 58
-7.54129267 -12.49689102 4.03618431 0 0 59
-7.55945730 -12.49872017 4.03324270 0 0 60
-7.57658815 -12.50095177 4.03162909 0 0 59
-7.59533739 -12.50326443 4.02749348 0 0 59
-7.61461878 -12.50555992 4.02528000 0 0 59
-7.63063383 -12.50732803 4.02293587 0 0 59
-7.64488745 -12.51039124 4.02109241 0 0 59
-7.66193533 -12.51175976 4.01741743 0 0 59
-7.67879725 -12.51400089 4.01483917 0 0 58
-7.70765162 -12.51528454 4.00685167 0 0 56
-7.70821238 -12.51835918 4.01087904 0 0 55
-7.74137449 -12.51976585 4.00169849 0 0 55
-7.75823832 -12.52200794 3.99912214 0 0 54
-7.77209520 -12.52371407 3.99737215 0 0 55
-7.78464937 -12.52583122 3.99598837 0 0 56
-7.79778814 -12.52843094 3.99341249 0 0 56
-7.81465197 -12.53067207 3.99083328 0 0 55
-7.83393240 -12.53296471 3.98862410 0 0 55
-7.84491587 -12.53549957 3.98664427 0 0 56
-7.86092615 -12.53726959 3.98429537 0 0 56
-7.87106276 -12.53933525 3.98254728 0 0 57
-7.88531542 -12.54239464 3.98070288 0 0 57
-7.91292143 -12.54185200 3.97304153 0 0 58
-7.91491938 -12.54588318 3.97564220 0 0 57
-7.94377375 -12.54716301 3.96765327 0 0 59
-7.95156717 -12.55003834 3.96759939 0 0 58
-7.96470308 -12.55263710 3.96502256 0 0 57
-7.97398520 -12.55423164 3.96350384 0 0 56
-7.98954248 -12.55688095 3.96129322 0 0 56
-8.00267982 -12.55948067 3.95871592 0 0 56
-8.01308250 -12.56153679 3.95793009 0 0 56
-8.01976013 -12.56394577 3.95714188 0 0 56
-8.03419685 -12.56613541 3.95419884 0 0 56
-8.04042244 -12.56942940 3.95354414 0 0 56
-8.05270958 -12.57155991 3.95119810 0 0 57
-8.06480980 -12.57455444 3.94995165 0 0 57
-8.06651497 -12.57549858 3.94948959 0 0 57
-8.07861328 -12.57849693 3.94824028 0 0 58
-8.08483696 -12.58178997 3.94758940 0 0 58
-8.10768127 -12.58200455 3.94125605 0 0 58
-8.12042046 -12.58325005 3.93877363 0 0 59
-8.12624550 -12.58518791 3.93821669 0 0 60
-8.15153503 -12.58855152 3.93435097 0 0 63
-8.15946388 -12.59278774 3.93323755 0 0 62
-8.16619301 -12.59296322 3.93241072 0 0 62
-8.17326546 -12.59673214 3.93152905 0 0 60
-8.17648697 -12.59948921 3.93170166 0 0 59
-8.18158913 -12.60231972 3.93031645 0 0 58
-8.19799995 -12.60544205 3.92787552 0 0 59
-8.19970322 -12.60638809 3.92741632 0 0 60
-8.20637894 -12.60879898 3.92662668 0 0 59
-8.21260071 -12.61209297 3.92597437 0 0 60
-8.22273254 -12.61415672 3.92422342 0 0 61
-8.22464943 -12.61732674 3.92476463 0 0 60
-8.22962379 -12.61879539 3.92443991 0 0 61
-8.23813248 -12.62351418 3.92212963 0 0 63
-8.24727631 -12.62648010 3.91858959 0 0 64
-8.24757385 -12.62956619 3.92165422 0 0 65
-8.25565338 -12.62983608 3.91733837 0 0 64
-8.26794052 -12.63196468 3.91499090 0 0 63
-8.26573372 -12.63413620 3.91562700 0 0 63
-8.27653122 -12.63754463 3.91474485 0 0 61
-8.28091812 -12.64126968 3.91253328 0 0 60
-8.29711342 -12.64216614 3.90908575 0 0 59
-8.28395081 -12.64489841 3.91380548 0 0 61
-8.28011894 -12.64972496 3.91388369 0 0 60
-8.29137039 -12.65225220 3.91286612 0 0 59
-8.27833748 -12.65635014 3.91652489 0 0 59
-8.30184746 -12.65790558 3.91105890 0 0 58
-8.30120468 -12.66239548 3.90920973 0 0 59
-8.31484795 -12.66187859 3.90645599 0 0 59
-8.31173325 -12.66581345 3.90736532 0 0 59
-8.31971359 -12.66781712 3.90621138 0 0 59
-8.29383469 -12.67513657 3.91242838 0 0 59
-8.32255745 -12.67505455 3.90549994 0 0 59
-8.29300880 -12.68050003 3.91167974 0 0 60
-8.30790138 -12.68180656 3.90860128 0 0 59
-8.29675484 -12.68597603 3.91070127 0 0 60
-8.27999878 -12.69042778 3.91435719 0 0 60
-8.29744339 -12.69315147 3.91058540 0 0 59
-8.26071358 -12.69930077 3.91772461 0 0 60
-8.30222893 -12.69823074 3.90827560 0 0 60
-8.24515152 -12.70781517 3.92109489 0 0 60
-8.26238060 -12.70831299 3.91632271 0 0 60
-8.29456520 -12.70788383 3.90843153 0 0 60
-8.15264130 -12.72587585 3.93760729 0 0 58
-8.22737885 -12.72123909 3.92201853 0 0 59
-8.19971466 -12.72675514 3.92663717 0 0 58
-8.16702461 -12.73303890 3.93162203 0 0 59
-8.15699768 -12.73766804 3.93445158 0 0 59
-8.16731262 -12.73885918 3.93160295 0 0 58
-6.51925611 -12.42856216 4.20577478 0 0 61
-6.56425714 -12.43024158 4.19746590 0 0 60
-6.61087751 -12.43200016 4.18662977 0 0 60
-6.64532709 -12.43285370 4.18538713 0 0 64
-6.67215586 -12.43544006 4.17693615 0 0 62
-6.72330427 -12.43681335 4.16899538 0 0 59
-6.75753641 -12.43817520 4.16366529 0 0 60
-6.78131342 -12.43972397 4.15916395 0 0 61
-6.82339334 -12.44172764 4.15374231 0 0 61
-6.85839224 -12.44270420 4.14612246 0 0 61
-6.89400721 -12.44452286 4.14248896 0 0 62
-7.06151533 -12.45531082 4.11483049 0 0 61
-7.09494066 -12.45670605 4.10661364 0 0 58
-7.12172556 -12.45878983 4.10128260 0 0 58
-7.14576769 -12.46032333 4.09774685 0 0 58
-7.17281771 -12.46239376 4.09337807 0 0 58
-7.20444155 -12.46457863 4.08878565 0 0 59
-7.22476244 -12.46647644 4.08524656 0 0 58
-7.24880552 -12.46801090 4.08170557 0 0 58
-7.27697134 -12.47054482 4.07807207 0 0 57
-7.29428911 -12.47190380 4.07536173 0 0 57
-7.31545877 -12.47426987 4.07159042 0 0 58
-7.34250689 -12.47634220 4.06722450 0 0 58
-7.36367750 -12.47870827 4.06345463 0 0 59
-7.37883711 -12.48000336 4.06133986 0 0 59
-7.40854406 -12.48175812 4.05311966 0 0 57
-7.43213320 -12.48417664 4.04971743 0 0 58
-7.44203234 -12.48660946 4.05218601 0 0 59
-7.47519445 -12.48801708 4.04300404 0 0 58
-7.49551439 -12.48991203 4.03946590 0 0 58
-7.51695204 -12.49226570 4.03665876 0 0 58
-7.53296423 -12.49403667 4.03431368 0 0 59
-7.55113077 -12.49586868 4.03136778 0 0 59
-7.56929636 -12.49770164 4.02842569 0 0 60
-7.58831072 -12.50000668 4.02525616 0 0 59
-7.60732794 -12.50230789 4.02208185 0 0 59
-7.62549448 -12.50413895 4.01913786 0 0 59
-7.64216948 -12.50725079 4.01765776 0 0 57
-7.65791368 -12.50903225 4.01435089 0 0 57
-7.67392588 -12.51080132 4.01200533 0 0 59
-7.68863535 -12.51297855 4.01002550 0 0 57
-7.72094774 -12.51391602 4.00107622 0 0 56
-7.72366285 -12.51705265 4.00450516 0 0 55
-7.75466967 -12.51839828 3.99592161 0 0 55
-7.77310038 -12.52021980 3.99394226 0 0 55
-7.78623819 -12.52281761 3.99136400 0 0 56
-7.79879332 -12.52493668 3.98998022 0 0 56
-7.81134844 -12.52705193 3.98859835 0 0 55
-7.83121538 -12.52982712 3.98519325 0 0 55
-7.85023260 -12.53212929 3.98201895 0 0 57
-7.85951471 -12.53372383 3.98050070 0 0 57
-7.87592363 -12.53684616 3.97806120 0 0 56
-7.88605547 -12.53890991 3.97630835 0 0 57
-7.89946222 -12.54149818 3.97469616 0 0 58
-7.92791700 -12.54142761 3.96680164 0 0 58
-7.92906427 -12.54498482 3.96963453 0 0 58
-7.95706606 -12.54579926 3.96187782 0 0 60
-7.96270609 -12.54860973 3.96242046 0 0 58
-7.97799921 -12.55126953 3.95924425 0 0 57
-7.98970175 -12.55291557 3.95809364 0 0 56
-8.00499344 -12.55557537 3.95491838 0 0 56
-8.01839828 -12.55816460 3.95330620 0 0 56
-8.02853012 -12.56022835 3.95155668 0 0 56
-8.03520775 -12.56264019 3.95076942 0 0 56
-8.04991531 -12.56481934 3.94878674 0 0 56
-8.05613899 -12.56811523 3.94813728 0 0 56
-8.06842422 -12.57024097 3.94578743 0 0 56
-8.08025742 -12.57324791 3.94357634 0 0 56
-8.08308029 -12.57465267 3.94384718 0 0 57
-8.09778786 -12.57683372 3.94186687 0 0 57
-8.10400963 -12.58012772 3.94121456 0 0 57
-8.12685394 -12.58034229 3.93488264 0 0 57
-8.13914108 -12.58246708 3.93253469 0 0 57
-8.14411545 -12.58393478 3.93220758 0 0 59
-8.16653442 -12.58812523 3.92811203 0 0 64
-8.17563057 -12.59058952 3.92769289 0 0 65
-8.18249130 -12.59213352 3.92580462 0 0 66
-8.19329071 -12.59554005 3.92492342 0 0 62
-8.19696236 -12.59741783 3.92496252 0 0 60
-8.20206833 -12.60024929 3.92358017 0 0 60
-8.21717262 -12.60378075 3.92150068 0 0 61
-8.21887398 -12.60472679 3.92104101 0 0 61
-8.22554779 -12.60713768 3.92025232 0 0 60
-8.23047256 -12.61083984 3.91996479 0 0 62
-8.24060440 -12.61290264 3.91821671 0 0 64
-8.24297142 -12.61519051 3.91862106 0 0 63
-8.24807549 -12.61802101 3.91723680 0 0 64
-8.25645638 -12.62137985 3.91598654 0 0 64
-8.26690102 -12.62393379 3.91207838 0 0 62
-8.26589394 -12.62742996 3.91551018 0 0 62
-8.27352524 -12.62858295 3.91133213 0 0 61
-8.28756714 -12.62941742 3.90848494 0 0 59
-8.28360558 -12.63288307 3.90961933 0 0 61
-8.29916191 -12.63553333 3.90740967 0 0 58
-8.30381584 -12.63924599 3.90615988 0 0 58
-8.32189751 -12.64021873 3.90115452 0 0 57
-8.30612946 -12.64376926 3.90660667 0 0 58
-8.30719376 -12.64646530 3.90737391 0 0 58
-8.31830406 -12.65036583 3.90433598 0 0 58
-8.30599403 -12.65357018 3.90882444 0 0 58
-8.32950401 -12.65512848 3.90335846 0 0 58
-8.33101463 -12.65968037 3.90091181 0 0 58
-8.34250832 -12.65910244 3.89875698 0 0 58
-8.33809090 -12.66344643 3.90002823 0 0 58
-8.34710503 -12.66505051 3.89754581 0 0 57
-8.32319450 -12.67330360 3.90426588 0 0 59
-8.35106659 -12.67275238 3.89757061 0 0 58
-8.32412529 -12.67737389 3.90301609 0 0 59
-8.34013367 -12.67914486 3.90066862 0 0 59
-8.32957268 -12.68379402 3.90157366 0 0 59
-8.31353569 -12.68735790 3.90606070 0 0 59
-8.33358574 -12.68926048 3.90155506 0 0 59
-8.29855728 -12.69635105 3.90823650 0 0 60
-8.33549881 -12.69516754 3.89901400 0 0 59
-8.28820992 -12.70322990 3.91014338 0 0 60
-8.30283546 -12.70454597 3.90610123 0 0 60
-8.33240700 -12.70493889 3.89894056 0 0 59
-8.22285843 -12.71888828 3.92221022 0 0 59
-8.28062248 -12.71648407 3.90927696 0 0 60
-8.26274872 -12.72047329 3.91220188 0 0 59
-8.23117638 -12.72721863 3.91791677 0 0 58
-8.19960213 -12.73396397 3.92363262 0 0 58
-8.20188713 -12.73538876 3.92197895 0 0 59
-8.18840218 -12.74036789 3.92577219 0 0 58
-6.51185846 -12.42978096 4.20265245 0 0 60
-6.55712557 -12.43144989 4.19530439 0 0 59
-6.60393095 -12.43233871 4.18337297 0 0 59
-6.64210463 -12.43283367 4.18213129 0 0 63
-6.66893530 -12.43541908 4.17367887 0 0 62
-6.72008181 -12.43678951 4.16573572 0 0 59
-6.75431395 -12.43815422 4.16040659 0 0 60
-6.78051233 -12.43975449 4.15627241 0 0 61
-6.82362604 -12.44136047 4.14951944 0 0 61
-6.85844088 -12.44321060 4.14300013 0 0 60
-6.89535952 -12.44461632 4.13900423 0 0 61
-7.06547117 -12.45458508 4.11061335 0 0 60
-7.09975195 -12.45645523 4.10216475 0 0 57
-7.12810469 -12.45811462 4.09742975 0 0 57
-7.15214777 -12.45965195 4.09389257 0 0 58
-7.17892885 -12.46173286 4.08856249 0 0 58
-7.21140432 -12.46439075 4.08373594 0 0 59
-7.23172712 -12.46628475 4.08019686 0 0 59
-7.25688887 -12.46828270 4.07738924 0 0 58
-7.28524256 -12.46994305 4.07265711 0 0 57
-7.30255556 -12.47130299 4.06994677 0 0 58
-7.32229280 -12.47271442 4.06760311 0 0 59
-7.35189295 -12.47620106 4.06254530 0 0 59
-7.37135935 -12.47762203 4.05923653 0 0 59
-7.38737345 -12.47939301 4.05689096 0 0 58
-7.41923285 -12.48120975 4.04807234 0 0 57
-7.44151926 -12.48403740 4.04503584 0 0 57
-7.45075083 -12.48512840 4.04663992 0 0 58
-7.48503065 -12.48699570 4.03819036 0 0 58
-7.50620317 -12.48936462 4.03442097 0 0 58
-7.52737570 -12.49173069 4.03065062 0 0 58
-7.54365301 -12.49348545 4.02926731 0 0 59
-7.56181669 -12.49531841 4.02632523 0 0 59
-7.57998228 -12.49715233 4.02338219 0 0 59
-7.59900141 -12.49945641 4.02020741 0 0 60
-7.61931849 -12.50134850 4.01666927 0 0 60
-7.63559866 -12.50310802 4.01528549 0 0 58
-7.65546751 -12.50588608 4.01188421 0 0 57
-7.67147779 -12.50765419 4.00953627 0 0 57
-7.68461370 -12.51025200 4.00695992 0 0 58
-7.70147753 -12.51249409 4.00438166 0 0 57
-7.73405313 -12.51341820 3.99639511 0 0 55
-7.73565531 -12.51609325 3.99909449 0 0 55
-7.76796293 -12.51702881 3.99014425 0 0 55
-7.78594637 -12.51973343 3.98829794 0 0 55
-7.79692984 -12.52226830 3.98631763 0 0 57
-7.81294203 -12.52404022 3.98397303 0 0 56
-7.82764959 -12.52621841 3.98199177 0 0 55
-7.84796762 -12.52811241 3.97845316 0 0 56
-7.86352777 -12.53076172 3.97624111 0 0 59
-7.87392759 -12.53281784 3.97545767 0 0 58
-7.89052248 -12.53506851 3.97191525 0 0 57
-7.89961958 -12.53753281 3.97149372 0 0 57
-7.91360712 -12.54060268 3.96868515 0 0 58
-7.94206476 -12.54053497 3.96079588 0 0 59
-7.94347811 -12.54407787 3.96458960 0 0 59
-7.96905851 -12.54483891 3.95646524 0 0 59
-7.97685385 -12.54771233 3.95641184 0 0 58
-7.99456739 -12.55042648 3.95360374 0 0 57
-8.00645447 -12.55119991 3.95135355 0 0 57
-8.02070808 -12.55426025 3.94951010 0 0 57
-8.03299713 -12.55638695 3.94716167 0 0 56
-8.04424667 -12.55891323 3.94614363 0 0 56
-8.05092239 -12.56132603 3.94535780 0 0 56
-8.06536102 -12.56351089 3.94241238 0 0 56
-8.07315826 -12.56638908 3.94235897 0 0 56
-8.08414268 -12.56892586 3.94037867 0 0 56
-8.09728050 -12.57152271 3.93780041 0 0 56
-8.10009766 -12.57292938 3.93807077 0 0 56
-8.11565590 -12.57557964 3.93586016 0 0 56
-8.12318420 -12.57846260 3.93484068 0 0 56
-8.14687729 -12.57915115 3.92827654 0 0 56
-8.15876770 -12.57992363 3.92602825 0 0 57
-8.16198540 -12.58268261 3.92620182 0 0 58
-8.18225098 -12.58681011 3.92270279 0 0 62
-8.18977928 -12.58969593 3.92168236 0 0 66
-8.19820786 -12.59081554 3.92039537 0 0 67
-8.21246338 -12.59387589 3.91855001 0 0 66
-8.21698570 -12.59622860 3.91835737 0 0 62
-8.22123909 -12.59858513 3.91720486 0 0 61
-8.23607826 -12.60212708 3.91416550 0 0 62
-8.23889923 -12.60353279 3.91443872 0 0 62
-8.24557686 -12.60594368 3.91364765 0 0 62
-8.24748993 -12.60911369 3.91418886 0 0 63
-8.25762367 -12.61117935 3.91243935 0 0 64
-8.26084328 -12.61393642 3.91261435 0 0 64
-8.26639938 -12.61588860 3.91109276 0 0 65
-8.27432251 -12.62012386 3.90998125 0 0 62
-8.28693008 -12.62274361 3.90547514 0 0 60
-8.28852272 -12.62541962 3.90817404 0 0 59
-8.29642296 -12.62656307 3.90496063 0 0 58
-8.31347084 -12.62793159 3.90128374 0 0 57
-8.30650139 -12.63086224 3.90324831 0 0 58
-8.32421303 -12.63357353 3.90044022 0 0 56
-8.32905197 -12.63641739 3.89809227 0 0 56
-8.34825325 -12.63785076 3.89381933 0 0 56
-8.33293724 -12.64051819 3.89913368 0 0 57
-8.33498383 -12.64505196 3.89861679 0 0 57
-8.34381104 -12.64752579 3.89723349 0 0 57
-8.33208466 -12.65121269 3.90052414 0 0 57
-8.35213280 -12.65311813 3.89602280 0 0 57
-8.35737228 -12.65731239 3.89357710 0 0 57
-8.36755562 -12.65714455 3.89178705 0 0 57
-8.36574554 -12.66066742 3.89232779 0 0 57
-8.37588310 -12.66273308 3.89057732 0 0 57
-8.35085297 -12.67052650 3.89656782 0 0 58
-8.38002968 -12.66956425 3.88950253 0 0 58
-8.35393524 -12.67465782 3.89471674 0 0 58
-8.36994743 -12.67642975 3.89237261 0 0 58
-8.36226082 -12.68025017 3.89350843 0 0 58
-8.34680557 -12.68429375 3.89680147 0 0 59
-8.36555481 -12.68660736 3.89266300 0 0 59
-8.33424759 -12.69334221 3.89934444 0 0 59
-8.37033844 -12.69168663 3.89035225 0 0 58
-8.32605553 -12.70028305 3.90065336 0 0 59
-8.33982849 -12.70112610 3.89684057 0 0 59
-8.36985397 -12.70063591 3.88954496 0 0 58
-8.27636719 -12.71412468 3.91043329 0 0 59
-8.32610321 -12.71194839 3.89869070 0 0 60
-8.31253242 -12.71606350 3.90042067 0 0 59
-8.29075050 -12.72128582 3.90444326 0 0 59
-8.25917816 -12.72802925 3.91016293 0 0 59
-8.25912094 -12.73026466 3.91020012 0 0 59
-8.22369385 -12.73600388 3.91697454 0 0 58
-8.22659302 -12.74101067 3.91622591 0 0 58
-6.54802179 -12.43172169 4.19264269 0 0 60
-6.59594774 -12.43307495 4.18144274 0 0 59
-6.63627577 -12.43363285 4.17960548 0 0 62
-6.66570997 -12.43539715 4.17042351 0 0 63
-6.71555471 -12.43717957 4.16284323 0 0 60
-6.75108957 -12.43813515 4.15715218 0 0 61
-6.77728701 -12.43973351 4.15301561 0 0 61
-6.82282305 -12.44139290 4.14663076 0 0 61
-6.85867357 -12.44284058 4.13878059 0 0 60
-6.89644289 -12.44472122 4.13455200 0 0 60
-7.10456228 -12.45620155 4.09771204 0 0 57
-7.13376665 -12.45833206 4.09275103 0 0 57
-7.15696001 -12.45939827 4.08944368 0 0 58
-7.18374205 -12.46147728 4.08411264 0 0 58
-7.21778631 -12.46371746 4.07988214 0 0 60
-7.23810530 -12.46561050 4.07634354 0 0 59
-7.26430368 -12.46721077 4.07221079 0 0 58
-7.29292345 -12.46885967 4.06844282 0 0 57
-7.31108713 -12.47068977 4.06549883 0 0 58
-7.32925367 -12.47252274 4.06255770 0 0 59
-7.35930872 -12.47512817 4.05736208 0 0 60
-7.37962961 -12.47702217 4.05382299 0 0 59
-7.39675665 -12.47925282 4.05220842 0 0 58
-7.42691278 -12.48012733 4.04385614 0 0 57
-7.45050669 -12.48254585 4.04045153 0 0 56
-7.46143961 -12.48457813 4.04159307 0 0 57
-7.49460363 -12.48598576 4.03241110 0 0 58
-7.51734400 -12.48793125 4.02923870 0 0 58
-7.53720903 -12.49070644 4.02583647 0 0 58
-7.55349016 -12.49246597 4.02445269 0 0 58
-7.57165575 -12.49430084 4.02150822 0 0 58
-7.59197474 -12.49619293 4.01797056 0 0 59
-7.60883760 -12.49843407 4.01539421 0 0 60
-7.62915659 -12.50032711 4.01185369 0 0 60
-7.64601755 -12.50256920 4.00927687 0 0 57
-7.66745615 -12.50492573 4.00647116 0 0 56
-7.68104601 -12.50664330 4.00375938 0 0 57
-7.69660807 -12.50929546 4.00154924 0 0 57
-7.71373415 -12.51152515 3.99993372 0 0 56
-7.74735022 -12.51205063 3.99061823 0 0 55
-7.74876547 -12.51559830 3.99441671 0 0 55
-7.78080511 -12.51654434 3.98450184 0 0 55
-7.79663515 -12.51918316 3.98325491 0 0 56
-7.80676413 -12.52124786 3.98150587 0 0 56
-7.82492971 -12.52308083 3.97856236 0 0 56
-7.84049273 -12.52573204 3.97635126 0 0 56
-7.85995722 -12.52715492 3.97304201 0 0 56
-7.87336397 -12.52974319 3.97142792 0 0 60
-7.88591814 -12.53185940 3.97004318 0 0 60
-7.90278006 -12.53410149 3.96746874 0 0 58
-7.91376352 -12.53663635 3.96548605 0 0 58
-7.92716837 -12.53922558 3.96387148 0 0 58
-7.95562315 -12.53915405 3.95598030 0 0 60
-7.95677233 -12.54271030 3.95881319 0 0 59
-7.98347235 -12.54393196 3.95141983 0 0 59
-7.99342012 -12.54687023 3.95076990 0 0 58
-8.01131439 -12.54870987 3.94686413 0 0 58
-8.02086449 -12.55029488 3.94631052 0 0 58
-8.03615570 -12.55295277 3.94313383 0 0 57
-8.04871368 -12.55507088 3.94174910 0 0 57
-8.05969620 -12.55760860 3.93977022 0 0 56
-8.06506920 -12.56042862 3.93934822 0 0 56
-8.08107948 -12.56219673 3.93700171 0 0 56
-8.08972168 -12.56554317 3.93671656 0 0 56
-8.10004044 -12.56673431 3.93386602 0 0 56
-8.11429787 -12.56979561 3.93202257 0 0 55
-8.11881828 -12.57214546 3.93183136 0 0 55
-8.13241005 -12.57386208 3.92911816 0 0 56
-8.14150620 -12.57632828 3.92870045 0 0 56
-8.16493225 -12.57702446 3.92117310 0 0 56
-8.17663765 -12.57866669 3.92001724 0 0 57
-8.17985344 -12.58142853 3.92019510 0 0 58
-8.19796753 -12.58549500 3.91729307 0 0 60
-8.20549393 -12.58837700 3.91627264 0 0 64
-8.21365738 -12.58950996 3.91402054 0 0 66
-8.22706032 -12.59209824 3.91240740 0 0 68
-8.23373795 -12.59451103 3.91161823 0 0 65
-8.23780632 -12.59774113 3.91156292 0 0 63
-8.25264549 -12.60128593 3.90852404 0 0 63
-8.25676537 -12.60227966 3.90842819 0 0 64
-8.26389503 -12.60381031 3.90750456 0 0 64
-8.26535988 -12.60786057 3.90818262 0 0 63
-8.27437592 -12.60946369 3.90569925 0 0 63
-8.27740860 -12.61309242 3.90697384 0 0 63
-8.28471947 -12.61375427 3.90495157 0 0 64
-8.29479790 -12.61805248 3.90324211 0 0 60
-8.30982208 -12.62072372 3.89910507 0 0 58
-8.31115532 -12.62341118 3.90083838 0 0 58
-8.32035828 -12.62414074 3.89725733 0 0 57
-8.33767319 -12.62550163 3.89454508 0 0 57
-8.33128548 -12.62891293 3.89531469 0 0 57
-8.34814835 -12.63115501 3.89273787 0 0 56
-8.35280037 -12.63486862 3.89148951 0 0 56
-8.37173271 -12.63630962 3.88625383 0 0 56
-8.35798645 -12.63855934 3.89216423 0 0 56
-8.35918236 -12.64262104 3.89188051 0 0 56
-8.36756134 -12.64597702 3.89063072 0 0 56
-8.35583115 -12.64966393 3.89392185 0 0 57
-8.37503433 -12.65109825 3.88965082 0 0 56
-8.38287544 -12.65447426 3.88647413 0 0 57
-8.39234352 -12.65519524 3.88385725 0 0 57
-8.39340591 -12.65789032 3.88462734 0 0 57
-8.40439034 -12.66042709 3.88264799 0 0 56
-8.37981415 -12.66733932 3.88850069 0 0 57
-8.40768623 -12.66678619 3.88179970 0 0 57
-8.38374710 -12.67194462 3.88642120 0 0 58
-8.39976120 -12.67371178 3.88407469 0 0 58
-8.39207077 -12.67753601 3.88521051 0 0 58
-8.38034439 -12.68122101 3.88850498 0 0 58
-8.39909172 -12.68353462 3.88436556 0 0 59
-8.36908913 -12.68985939 3.89067984 0 0 58
-8.40603065 -12.68867588 3.88146114 0 0 58
-8.36089706 -12.69679737 3.89198923 0 0 58
-8.37597466 -12.69723320 3.88781309 0 0 58
-8.40815353 -12.69680786 3.87992048 0 0 57
-8.31969452 -12.70952511 3.90044212 0 0 60
-8.36812401 -12.70775986 3.88906431 0 0 59
-8.35801315 -12.71153069 3.88983679 0 0 59
-8.34125710 -12.71598434 3.89349222 0 0 59
-8.31771660 -12.72249603 3.89801455 0 0 59
-8.31870270 -12.72433281 3.89672518 0 0 59
-8.27981377 -12.73041821 3.90446377 0 0 59
-8.26358795 -12.73758793 3.90696383 0 0 59
-8.23879814 -12.74227619 3.91181517 0 0 58
-8.26770592 -12.74132156 3.90378714 0 0 59
-6.53918791 -12.43198586 4.19094563 0 0 60
-6.58581018 -12.43375015 4.18011141 0 0 59
-6.62932634 -12.43396759 4.17634630 0 0 62
-6.65903330 -12.43572426 4.16812658 0 0 63
-6.71103048 -12.43756866 4.15995312 0 0 61
-6.74656439 -12.43852425 4.15425777 0 0 61
-6.77321672 -12.43924141 4.14998674 0 0 61
-6.82175398 -12.44143295 4.14277601 0 0 61
-6.85630274 -12.44329262 4.13529158 0 0 60
-6.89694548 -12.44434071 4.13129473 0 0 60
-7.13857698 -12.45807838 4.08830214 0 0 58
-7.16046476 -12.45955276 4.08535814 0 0 59
-7.18796587 -12.46074200 4.08085823 0 0 58
-7.22389936 -12.46305370 4.07506609 0 0 61
-7.24336863 -12.46447372 4.07175970 0 0 60
-7.27126646 -12.46701908 4.06716251 0 0 59
-7.29988718 -12.46866798 4.06339502 0 0 58
-7.31805468 -12.47049999 4.06045103 0 0 59
-7.33621836 -12.47233200 4.05751038 0 0 60
-7.36653948 -12.47492599 4.05327845 0 0 60
-7.38816214 -12.47641087 4.04937458 0 0 60
-7.40632677 -12.47824287 4.04643106 0 0 58
-7.43387747 -12.47993660 4.03880930 0 0 58
-7.45962477 -12.48241711 4.03481054 0 0 56
-7.47212839 -12.48402977 4.03654575 0 0 56
-7.50529146 -12.48543644 4.02736425 0 0 58
-7.52803087 -12.48738480 4.02419329 0 0 60
-7.54574442 -12.49009705 4.02138615 0 0 59
-7.56287527 -12.49232960 4.01977205 0 0 58
-7.58234358 -12.49374962 4.01646519 0 0 58
-7.60266161 -12.49564362 4.01292324 0 0 59
-7.61952353 -12.49788570 4.01034784 0 0 60
-7.63854265 -12.50018787 4.00717354 0 0 59
-7.65671015 -12.50202274 4.00422955 0 0 57
-7.67814493 -12.50437737 4.00142622 0 0 57
-7.69173574 -12.50609303 3.99871397 0 0 57
-7.70944834 -12.50881004 3.99590683 0 0 56
-7.72657919 -12.51103973 3.99429131 0 0 55
-7.75934076 -12.51109314 3.98520660 0 0 56
-7.76048803 -12.51464844 3.98804140 0 0 55
-7.79194975 -12.51511192 3.97932100 0 0 56
-7.80647039 -12.51816368 3.97843933 0 0 56
-7.82006121 -12.51988316 3.97572470 0 0 55
-7.83692122 -12.52212429 3.97314787 0 0 56
-7.85293436 -12.52388954 3.97080278 0 0 56
-7.87064600 -12.52660561 3.96799612 0 0 57
-7.88405275 -12.52919579 3.96638107 0 0 59
-7.89660501 -12.53131008 3.96500015 0 0 59
-7.91346693 -12.53355217 3.96242285 0 0 58
-7.92575502 -12.53567600 3.96007299 0 0 58
-7.94131517 -12.53832912 3.95786381 0 0 58
-7.96761751 -12.53819656 3.95056581 0 0 61
-7.96961355 -12.54222679 3.95317364 0 0 60
-7.99676561 -12.54256439 3.94564486 0 0 59
-8.00756264 -12.54597378 3.94476175 0 0 59
-8.02442360 -12.54821205 3.94218540 0 0 59
-8.03370857 -12.54980564 3.94066525 0 0 59
-8.05056953 -12.55204773 3.93808889 0 0 58
-8.06285667 -12.55417538 3.93574190 0 0 57
-8.07456207 -12.55581856 3.93459082 0 0 57
-8.07993317 -12.55864048 3.93417168 0 0 56
-8.09652901 -12.56089020 3.93062782 0 0 56
-8.10647583 -12.56382751 3.92997789 0 0 56
-8.11745834 -12.56636429 3.92799616 0 0 56
-8.13301849 -12.56901455 3.92578554 0 0 56
-8.13714218 -12.57001305 3.92569017 0 0 56
-8.15028000 -12.57261276 3.92311382 0 0 56
-8.15937614 -12.57507420 3.92269278 0 0 56
-8.18149948 -12.57617950 3.91552877 0 0 57
-8.19235420 -12.57735443 3.91460752 0 0 57
-8.19687653 -12.57970238 3.91441965 0 0 57
-8.21602058 -12.58336926 3.91018438 0 0 58
-8.22251320 -12.58665276 3.91049576 0 0 61
-8.22937393 -12.58819580 3.90861082 0 0 64
-8.24147606 -12.59119415 3.90736151 0 0 68
-8.24815178 -12.59360504 3.90657663 0 0 67
-8.25482750 -12.59601498 3.90578556 0 0 64
-8.26881218 -12.59908581 3.90297794 0 0 63
-8.27266884 -12.60009193 3.90191889 0 0 64
-8.28019905 -12.60297775 3.90089989 0 0 65
-8.28453255 -12.60619831 3.90181017 0 0 63
-8.29439735 -12.60827255 3.89909697 0 0 61
-8.29546356 -12.61096668 3.89986563 0 0 61
-8.30344200 -12.61297226 3.89871550 0 0 63
-8.31743240 -12.61604023 3.89590406 0 0 59
-8.33115196 -12.61912155 3.89213371 0 0 57
-8.33274841 -12.62180042 3.89483213 0 0 57
-8.34168434 -12.62254143 3.89028883 0 0 57
-8.35814857 -12.62343216 3.88780403 0 0 57
-8.35418510 -12.62689400 3.88894176 0 0 56
-8.37104607 -12.62913609 3.88636684 0 0 56
-8.37542915 -12.63285828 3.88415241 0 0 56
-8.39463234 -12.63429070 3.87988138 0 0 56
-8.38061523 -12.63655090 3.88482904 0 0 56
-8.38226700 -12.63973045 3.88440752 0 0 56
-8.39149475 -12.64355850 3.88292694 0 0 56
-8.37976456 -12.64724350 3.88621998 0 0 56
-8.40112114 -12.64873886 3.88135004 0 0 56
-8.40877914 -12.65298653 3.87927294 0 0 56
-8.41784859 -12.65235519 3.87675095 0 0 56
-8.41904068 -12.65641403 3.87646341 0 0 56
-8.43047905 -12.65806961 3.87434864 0 0 57
-8.40832138 -12.66503143 3.88056707 0 0 57
-8.43489075 -12.66488838 3.87423420 0 0 57
-8.41140747 -12.66916466 3.87871981 0 0 58
-8.42957115 -12.67099857 3.87577868 0 0 58
-8.42057800 -12.67523003 3.87727976 0 0 58
-8.41146088 -12.67809486 3.87983799 0 0 59
-8.43020630 -12.68041039 3.87570333 0 0 59
-8.40366364 -12.68638897 3.88105154 0 0 58
-8.43929863 -12.68561077 3.87220144 0 0 58
-8.39788818 -12.69337845 3.88273096 0 0 57
-8.41296959 -12.69381523 3.87855339 0 0 57
-8.44469452 -12.69426727 3.87079668 0 0 57
-8.35884094 -12.70616913 3.89058638 0 0 59
-8.40857506 -12.70399284 3.87884521 0 0 58
-8.39873123 -12.70775223 3.88057709 0 0 59
-8.38601685 -12.71234322 3.88207817 0 0 59
-8.36795998 -12.71720505 3.88609982 0 0 59
-8.37136269 -12.71909332 3.88517714 0 0 59
-8.33678246 -12.72530174 3.89172077 0 0 59
-8.31643295 -12.73147774 3.89431715 0 0 59
-8.26515198 -12.73990631 3.90448141 0 0 59
-8.30685425 -12.73796558 3.89393282 0 0 60
-6.52662897 -12.43260956 4.18924809 0 0 60
-6.57213068 -12.43390942 4.17767811 0 0 59
-6.62264872 -12.43429756 4.17405224 0 0 62
-6.65234995 -12.43604851 4.16583204 0 0 63
-6.70565176 -12.43748283 4.15729094 0 0 62
-6.74203730 -12.43891430 4.15136576 0 0 60
-6.76953745 -12.44010353 4.14686680 0 0 61
-6.81983519 -12.44100380 4.13915491 0 0 61
-6.85550165 -12.44332314 4.13240099 0 0 60
-6.89672709 -12.44485569 4.12720919 0 0 59
-7.16285276 -12.45924854 4.08054399 0 0 59
-7.19362688 -12.46096039 4.07617712 0 0 57
-7.22870970 -12.46280098 4.07062006 0 0 62
-7.24772501 -12.46510315 4.06744528 0 0 61
-7.27765036 -12.46634674 4.06330967 0 0 59
-7.30554628 -12.46888542 4.05871439 0 0 59
-7.32416487 -12.46983528 4.05563593 0 0 60
-7.34344721 -12.47213173 4.05342531 0 0 61
-7.37350416 -12.47473717 4.04823160 0 0 61
-7.39642954 -12.47581291 4.04396152 0 0 60
-7.41355848 -12.47804070 4.04234982 0 0 59
-7.44110823 -12.47973251 4.03472662 0 0 58
-7.46815825 -12.48180580 4.03035879 0 0 57
-7.48151350 -12.48389244 4.03186703 0 0 57
-7.51355886 -12.48483467 4.02195263 0 0 59
-7.53499651 -12.48719215 4.01914549 0 0 61
-7.55401182 -12.48949814 4.01597261 0 0 60
-7.57244349 -12.49131966 4.01399422 0 0 58
-7.59303141 -12.49320030 4.01141882 0 0 58
-7.61204767 -12.49550629 4.00824499 0 0 59
-7.62805796 -12.49727058 4.00589991 0 0 59
-7.64923143 -12.49964142 4.00212908 0 0 58
-7.66739511 -12.50147152 3.99918509 0 0 57
-7.68883181 -12.50382900 3.99637938 0 0 57
-7.70354223 -12.50600815 3.99439907 0 0 57
-7.72170591 -12.50783730 3.99145555 0 0 56
-7.73902178 -12.50919914 3.98874426 0 0 56
-7.77002859 -12.51054573 3.98016024 0 0 57
-7.77359629 -12.51415253 3.98336172 0 0 56
-7.80133200 -12.51497459 3.97463942 0 0 56
-7.81715918 -12.51761436 3.97339201 0 0 55
-7.83316946 -12.51938438 3.97104788 0 0 55
-7.85003519 -12.52162743 3.96846962 0 0 56
-7.86604643 -12.52339554 3.96612263 0 0 56
-7.88178682 -12.52517509 3.96281576 0 0 56
-7.89604425 -12.52823639 3.96096992 0 0 57
-7.90990019 -12.52993965 3.95922184 0 0 58
-7.92545748 -12.53259468 3.95700979 0 0 57
-7.93774939 -12.53472137 3.95466232 0 0 57
-7.95487738 -12.53694916 3.95304918 0 0 59
-7.97875452 -12.53676605 3.94538593 0 0 60
-7.98160696 -12.54126644 3.94775867 0 0 60
-8.00960732 -12.54207897 3.94000149 0 0 59
-8.02000809 -12.54413223 3.93921614 0 0 59
-8.03641891 -12.54725456 3.93677473 0 0 59
-8.04615211 -12.54796600 3.93511915 0 0 59
-8.06471252 -12.55115223 3.93208122 0 0 59
-8.07727051 -12.55326843 3.93069553 0 0 58
-8.08955765 -12.55539513 3.92834902 0 0 57
-8.09492874 -12.55821800 3.92792940 0 0 57
-8.11094093 -12.55998802 3.92558336 0 0 56
-8.12088585 -12.56292152 3.92493105 0 0 57
-8.13362694 -12.56416512 3.92245197 0 0 56
-8.14846802 -12.56770992 3.91941023 0 0 56
-8.15344048 -12.56918049 3.91908598 0 0 56
-8.16684532 -12.57176590 3.91747236 0 0 57
-8.17567825 -12.57424164 3.91608620 0 0 57
-8.19721603 -12.57486534 3.91012049 0 0 57
-8.20780182 -12.57604599 3.90823221 0 0 57
-8.21232414 -12.57839680 3.90804338 0 0 57
-8.23389244 -12.58211708 3.90417719 0 0 57
-8.24011612 -12.58540916 3.90352440 0 0 59
-8.24639130 -12.58646870 3.90283251 0 0 61
-8.25562096 -12.59029579 3.90135336 0 0 64
-8.26229668 -12.59270668 3.90056705 0 0 65
-8.27157784 -12.59429932 3.89904690 0 0 63
-8.28798485 -12.59742355 3.89660406 0 0 62
-8.29054070 -12.59884071 3.89591217 0 0 63
-8.29591370 -12.60165787 3.89549017 0 0 64
-8.30285645 -12.60406113 3.89566660 0 0 62
-8.31514359 -12.60618877 3.89331770 0 0 60
-8.31791115 -12.60982990 3.89362860 0 0 60
-8.32288361 -12.61129665 3.89330149 0 0 61
-8.33960915 -12.61491394 3.88870382 0 0 59
-8.35077667 -12.61658096 3.88562393 0 0 57
-8.35322952 -12.61972618 3.88809156 0 0 57
-8.36327553 -12.62093163 3.88428307 0 0 57
-8.37947464 -12.62182808 3.88083696 0 0 57
-8.37550926 -12.62528896 3.88197374 0 0 56
-8.39237213 -12.62753391 3.87939787 0 0 56
-8.39747810 -12.63036442 3.87801170 0 0 56
-8.41510582 -12.63221741 3.87314129 0 0 56
-8.40221405 -12.63494110 3.87882519 0 0 56
-8.40471077 -12.63858986 3.87816858 0 0 56
-8.41569519 -12.64112759 3.87618923 0 0 56
-8.40481567 -12.64528465 3.87925100 0 0 56
-8.42747498 -12.64637184 3.87401581 0 0 56
-8.43186188 -12.65009499 3.87180328 0 0 56
-8.44159698 -12.65080833 3.87014675 0 0 56
-8.44239426 -12.65351295 3.86995554 0 0 56
-8.45467949 -12.65563679 3.86761045 0 0 57
-8.43467903 -12.66266441 3.87323284 0 0 57
-8.46124840 -12.66252422 3.86690092 0 0 57
-8.43776131 -12.66679764 3.87138414 0 0 57
-8.45507622 -12.66815948 3.86867237 0 0 57
-8.44908714 -12.67292213 3.86934710 0 0 58
-8.43866348 -12.67620087 3.87227440 0 0 59
-8.45656204 -12.67804146 3.86836815 0 0 60
-8.43589592 -12.68372536 3.87312460 0 0 59
-8.46852875 -12.68241501 3.86509657 0 0 58
-8.43488121 -12.68996048 3.87347174 0 0 57
-8.44865608 -12.69080257 3.86966038 0 0 57
-8.47823334 -12.69119644 3.86250114 0 0 57
-8.39798927 -12.70281029 3.88072920 0 0 58
-8.44471931 -12.70010185 3.86981678 0 0 58
-8.43572807 -12.70433235 3.87131500 0 0 59
-8.42543221 -12.70897293 3.87318420 0 0 59
-8.41213417 -12.71308136 3.87587929 0 0 59
-8.41657257 -12.71456718 3.87362719 0 0 59
-8.38917923 -12.72007370 3.87920904 0 0 59
-8.37340355 -12.72636414 3.88157511 0 0 59
-8.31323814 -12.73455429 3.89316320 0 0 60
-8.35866356 -12.73225403 3.88261461 0 0 60
-8.29440498 -12.74254322 3.89639521 0 0 59
-6.50904322 -12.43399906 4.18791246 0 0 60
-6.55696726 -12.43534946 4.17671061 0 0 59
-6.61354685 -12.43457031 4.17139006 0 0 61
-6.64324808 -12.43632317 4.16316986 0 0 63
-6.69897413 -12.43781281 4.15499544 0 0 61
-6.73666239 -12.43883133 4.14870787 0 0 60
-6.76631403 -12.44008255 4.14360905 0 0 60
-6.81773138 -12.44144630 4.13662958 0 0 61
-6.85358286 -12.44289398 4.12877703 0 0 60
-6.89565802 -12.44489765 4.12335634 0 0 59
-7.16681337 -12.45852280 4.07632208 0 0 59
-7.19758368 -12.46023750 4.07195711 0 0 58
-7.23351717 -12.46254444 4.06616831 0 0 64
-7.25168276 -12.46437836 4.06322670 0 0 62
-7.28245783 -12.46608925 4.05886030 0 0 60
-7.31192827 -12.46821308 4.05486250 0 0 60
-7.33009481 -12.47004509 4.05191994 0 0 62
-7.35041285 -12.47193909 4.04837990 0 0 62
-7.37961626 -12.47407341 4.04341555 0 0 61
-7.40365934 -12.47560978 4.03987932 0 0 61
-7.42052126 -12.47785091 4.03730059 0 0 60
-7.44937563 -12.47913361 4.02931356 0 0 58
-7.47669268 -12.48119354 4.02590990 0 0 58
-7.48977995 -12.48329067 4.02645493 0 0 58
-7.52209139 -12.48422432 4.01750374 0 0 60
-7.54110861 -12.48653030 4.01432848 0 0 61
-7.56384897 -12.48847389 4.01115656 0 0 60
-7.58182955 -12.49117661 4.00931549 0 0 58
-7.60260153 -12.49218941 4.00563860 0 0 58
-7.62031412 -12.49490452 4.00283289 0 0 58
-7.63632631 -12.49667358 4.00048542 0 0 58
-7.65906572 -12.49862194 3.99731255 0 0 57
-7.67853594 -12.50004101 3.99400377 0 0 56
-7.69867086 -12.50280571 3.99156427 0 0 56
-7.71441317 -12.50458717 3.98825550 0 0 57
-7.73284864 -12.50640678 3.98627663 0 0 57
-7.75056219 -12.50912189 3.98346806 0 0 57
-7.78071833 -12.50999451 3.97511339 0 0 58
-7.78558969 -12.51319313 3.97794724 0 0 56
-7.81116915 -12.51395607 3.96982574 0 0 56
-7.83045244 -12.51624584 3.96761370 0 0 55
-7.84646463 -12.51801682 3.96526814 0 0 55
-7.86202288 -12.52066612 3.96305943 0 0 56
-7.87718630 -12.52196598 3.96094179 0 0 56
-7.89489985 -12.52467918 3.95813370 0 0 56
-7.91045523 -12.52732849 3.95592499 0 0 57
-7.92359400 -12.52992630 3.95334768 0 0 57
-7.93960333 -12.53169632 3.95099974 0 0 56
-7.95216036 -12.53381348 3.94961834 0 0 57
-7.96687078 -12.53599167 3.94763517 0 0 59
-7.99029684 -12.53668976 3.94011164 0 0 59
-7.99359751 -12.54030895 3.94234657 0 0 59
-8.02186775 -12.54111099 3.93555260 0 0 58
-8.03226471 -12.54316330 3.93476820 0 0 59
-8.04886055 -12.54541588 3.93122721 0 0 59
-8.06056595 -12.54706097 3.93007326 0 0 58
-8.07827950 -12.54977226 3.92726803 0 0 59
-8.09141541 -12.55237389 3.92469025 0 0 58
-8.10311699 -12.55401611 3.92353630 0 0 58
-8.10979652 -12.55642796 3.92274809 0 0 57
-8.12639046 -12.55868053 3.91920757 0 0 56
-8.13503456 -12.56202602 3.91892195 0 0 56
-8.14777184 -12.56327057 3.91644239 0 0 56
-8.16333389 -12.56591988 3.91423035 0 0 56
-8.16700363 -12.56780052 3.91427183 0 0 56
-8.18144608 -12.56998920 3.91132689 0 0 57
-8.19139290 -12.57292557 3.91067553 0 0 57
-8.21293068 -12.57354736 3.90470791 0 0 57
-8.22221565 -12.57514095 3.90318871 0 0 56
-8.23019218 -12.57714176 3.90203524 0 0 56
-8.25045776 -12.58127213 3.89853621 0 0 57
-8.25798416 -12.58415508 3.89751673 0 0 58
-8.26296043 -12.58562469 3.89719105 0 0 59
-8.27264023 -12.58856964 3.89557695 0 0 60
-8.27846527 -12.59051228 3.89501858 0 0 61
-8.28644371 -12.59251595 3.89386797 0 0 62
-8.30455589 -12.59657860 3.89096308 0 0 62
-8.30710793 -12.59799385 3.89026976 0 0 62
-8.31292915 -12.59993649 3.88971233 0 0 62
-8.32045937 -12.60281944 3.88869572 0 0 62
-8.33431435 -12.60452271 3.88694715 0 0 61
-8.33838654 -12.60775566 3.88688993 0 0 60
-8.34309387 -12.60923672 3.88560152 0 0 60
-8.35793114 -12.61277771 3.88256216 0 0 60
-8.37080002 -12.61538887 3.87902212 0 0 58
-8.37370110 -12.61765289 3.88135290 0 0 57
-8.38375282 -12.61885643 3.87754154 0 0 57
-8.40125275 -12.61934757 3.87373161 0 0 57
-8.39598846 -12.62322044 3.87523413 0 0 57
-8.41284752 -12.62545967 3.87265635 0 0 57
-8.41750336 -12.62917328 3.87140846 0 0 56
-8.43513298 -12.63102627 3.86653662 0 0 56
-8.42354012 -12.63333893 3.87185144 0 0 56
-8.42649269 -12.63610649 3.87106466 0 0 56
-8.43917465 -12.63958740 3.86861944 0 0 57
-8.42901993 -12.64285278 3.87251425 0 0 56
-8.45383072 -12.64400291 3.86668062 0 0 56
-8.45691299 -12.64813614 3.86483288 0 0 56
-8.46768570 -12.64844894 3.86184931 0 0 56
-8.46744537 -12.65155411 3.86298752 0 0 56
-8.48018456 -12.65279770 3.86050510 0 0 57
-8.45973015 -12.66070843 3.86626339 0 0 57
-8.48675537 -12.65968037 3.85979605 0 0 57
-8.46326637 -12.66395855 3.86428213 0 0 57
-8.48097992 -12.66667175 3.86147356 0 0 57
-8.47589684 -12.66967392 3.86187649 0 0 58
-8.46546936 -12.67295265 3.86480570 0 0 58
-8.48336792 -12.67479515 3.86089754 0 0 59
-8.46270561 -12.68047428 3.86565161 0 0 59
-8.49834061 -12.67969990 3.85679817 0 0 58
-8.46599960 -12.68683434 3.86480665 0 0 57
-8.47892189 -12.68720818 3.86122799 0 0 57
-8.50849915 -12.68759918 3.85406637 0 0 58
-8.43413162 -12.69892025 3.87170172 0 0 58
-8.47883987 -12.69751167 3.86032486 0 0 57
-8.47056580 -12.70085144 3.86265326 0 0 58
-8.46130753 -12.70509243 3.86319399 0 0 58
-8.45173454 -12.70884132 3.86589003 0 0 59
-8.45598793 -12.71120262 3.86473465 0 0 59
-8.43335342 -12.71595001 3.86898756 0 0 59
-8.42606163 -12.72112465 3.87002850 0 0 59
-8.37020683 -12.72943592 3.88042116 0 0 59
-8.41432953 -12.72754860 3.87024069 0 0 59
-8.33270264 -12.73871422 3.88677263 0 0 60
-8.32658386 -12.74211693 3.88850451 0 0 59
-8.35458946 -12.74292564 3.88074923 0 0 60
-6.53938055 -12.43673801 4.17537642 0 0 60
-6.60125399 -12.43518162 4.17065382 0 0 60
-6.63441515 -12.43658924 4.16146994 0 0 63
-6.68987226 -12.43808842 4.15233469 0 0 61
-6.72841120 -12.43957806 4.14581442 0 0 60
-6.76048613 -12.44088173 4.14108467 0 0 60
-6.81320333 -12.44183254 4.13373709 0 0 61
-6.84990454 -12.44375515 4.12565374 0 0 60
-6.89400530 -12.44445705 4.12069750 0 0 59
-7.20109129 -12.46039200 4.06787252 0 0 58
-7.23702288 -12.46270180 4.06208324 0 0 63
-7.25649214 -12.46412373 4.05877542 0 0 61
-7.28726721 -12.46583843 4.05441141 0 0 60
-7.31758833 -12.46843338 4.05017900 0 0 61
-7.33405161 -12.46932030 4.04770041 0 0 62
-7.35567617 -12.47080421 4.04379511 0 0 62
-7.38599730 -12.47339821 4.03956270 0 0 61
-7.40977240 -12.47494507 4.03506184 0 0 61
-7.42775393 -12.47764969 4.03321743 0 0 60
-7.45706129 -12.47805214 4.02509546 0 0 58
-7.48495913 -12.48059368 4.02049828 0 0 59
-7.49746370 -12.48220634 4.02223873 0 0 58
-7.52932405 -12.48402405 4.01341867 0 0 60
-7.55049562 -12.48639107 4.00965023 0 0 59
-7.57238340 -12.48786354 4.00670862 0 0 59
-7.58951139 -12.49009514 4.00509548 0 0 59
-7.60983324 -12.49198914 4.00155687 0 0 58
-7.62884760 -12.49429321 3.99838305 0 0 58
-7.64616442 -12.49565315 3.99567080 0 0 57
-7.66890574 -12.49759769 3.99249792 0 0 56
-7.68922472 -12.49949360 3.98895884 0 0 56
-7.70935869 -12.50225925 3.98651838 0 0 56
-7.72537088 -12.50402832 3.98417377 0 0 57
-7.74326944 -12.50586891 3.98026705 0 0 58
-7.76039839 -12.50809956 3.97865391 0 0 58
-7.79055357 -12.50897503 3.97029829 0 0 58
-7.79646158 -12.51177311 3.97180367 0 0 57
-7.82185698 -12.51340485 3.96477842 0 0 56
-7.84244490 -12.51528931 3.96220255 0 0 56
-7.85715151 -12.51746655 3.96022415 0 0 56
-7.87186098 -12.51964760 3.95824480 0 0 56
-7.88787508 -12.52141571 3.95589828 0 0 57
-7.90688944 -12.52372074 3.95272255 0 0 57
-7.92375040 -12.52595901 3.95014668 0 0 57
-7.93630552 -12.52807808 3.94876432 0 0 57
-7.95375109 -12.53080177 3.94499350 0 0 56
-7.96545553 -12.53244400 3.94383907 0 0 57
-7.97885942 -12.53503418 3.94222355 0 0 58
-8.00359154 -12.53532410 3.93433142 0 0 57
-8.00716019 -12.53892899 3.93753433 0 0 58
-8.03359222 -12.54016113 3.92917967 0 0 57
-8.04510880 -12.54267693 3.92912531 0 0 58
-8.06197166 -12.54491901 3.92654657 0 0 59
-8.07556152 -12.54663563 3.92383528 0 0 59
-8.09242439 -12.54887772 3.92125845 0 0 60
-8.10601425 -12.55059719 3.91854668 0 0 58
-8.11726570 -12.55312347 3.91752863 0 0 58
-8.12524223 -12.55512238 3.91637468 0 0 57
-8.14210701 -12.55736542 3.91379929 0 0 57
-8.14989853 -12.56023788 3.91374254 0 0 56
-8.16349030 -12.56195641 3.91103029 0 0 56
-8.17747688 -12.56502724 3.90822268 0 0 56
-8.18245316 -12.56649303 3.90789843 0 0 56
-8.19585609 -12.56908131 3.90628290 0 0 57
-8.20580292 -12.57201672 3.90563154 0 0 57
-8.22753334 -12.57177162 3.89856386 0 0 56
-8.23896790 -12.57342720 3.89644909 0 0 56
-8.24721336 -12.57541847 3.89626026 0 0 56
-8.26721191 -12.57955551 3.89179564 0 0 56
-8.27500343 -12.58243179 3.89173985 0 0 57
-8.27971268 -12.58390808 3.89044905 0 0 57
-8.29050827 -12.58731747 3.88956738 0 0 58
-8.29588318 -12.59013939 3.88914728 0 0 59
-8.30170631 -12.59207726 3.88859129 0 0 60
-8.31915283 -12.59480095 3.88481951 0 0 60
-8.32282257 -12.59667969 3.88485909 0 0 60
-8.33080101 -12.59868336 3.88370657 0 0 60
-8.33832932 -12.60156631 3.88268614 0 0 62
-8.35106850 -12.60281086 3.88020611 0 0 62
-8.35625267 -12.60650349 3.88088417 0 0 62
-8.36383438 -12.60715103 3.87982512 0 0 61
-8.37710381 -12.61111641 3.87618971 0 0 60
-8.39127922 -12.61331463 3.87228107 0 0 58
-8.39372635 -12.61646271 3.87474966 0 0 57
-8.40423012 -12.61678600 3.87080288 0 0 57
-8.42154503 -12.61814499 3.86809111 0 0 57
-8.41673279 -12.62113667 3.86945868 0 0 57
-8.43202209 -12.62379646 3.86628294 0 0 57
-8.43797874 -12.62710190 3.86466885 0 0 56
-8.45561028 -12.62895584 3.85979748 0 0 56
-8.44316673 -12.63079262 3.86534452 0 0 56
-8.44938850 -12.63408661 3.86469126 0 0 56
-8.46122360 -12.63709641 3.86248016 0 0 57
-8.45425606 -12.64002419 3.86444378 0 0 57
-8.47672844 -12.64198303 3.86030865 0 0 58
-8.48326874 -12.64576721 3.85749722 0 0 56
-8.49318886 -12.64560795 3.85474443 0 0 57
-8.49353218 -12.64919662 3.85469007 0 0 56
-8.50496674 -12.65085220 3.85257196 0 0 57
-8.48411751 -12.65740681 3.85842800 0 0 57
-8.51153755 -12.65773296 3.85186243 0 0 57
-8.48917007 -12.66246796 3.85708094 0 0 56
-8.50733566 -12.66430378 3.85413742 0 0 57
-8.50225258 -12.66730785 3.85454130 0 0 57
-8.49267578 -12.67105579 3.85724020 0 0 58
-8.51188087 -12.67248535 3.85296774 0 0 58
-8.49120903 -12.67816925 3.85772276 0 0 59
-8.52945709 -12.67657471 3.84813547 0 0 58
-8.49581146 -12.68412018 3.85651255 0 0 57
-8.51088905 -12.68455505 3.85233355 0 0 58
-8.53987885 -12.68446445 3.84636974 0 0 58
-8.46767044 -12.69584751 3.86340380 0 0 57
-8.51237488 -12.69443798 3.85202932 0 0 57
-8.50599098 -12.69784927 3.85279846 0 0 57
-8.49615097 -12.70161057 3.85453033 0 0 57
-8.48872757 -12.70542049 3.85662889 0 0 58
-8.49298096 -12.70778084 3.85547543 0 0 58
-8.47322083 -12.71170044 3.85996103 0 0 58
-8.46566391 -12.71688461 3.86003780 0 0 58
-8.42417145 -12.72378922 3.86850739 0 0 59
-8.46457100 -12.72225761 3.85832453 0 0 58
-8.38796997 -12.73265457 3.87449026 0 0 59
-8.36919022 -12.73841095 3.87768412 0 0 59
-8.40221977 -12.73845387 3.86956406 0 0 58
-8.35062408 -12.74638748 3.88188410 0 0 59
-8.37953186 -12.74543953 3.87385845 0 0 59
-6.51905489 -12.43758106 4.17583370 0 0 61
-6.58496904 -12.43615913 4.16895437 0 0 60
-6.62140417 -12.43809128 4.15990973 0 0 62
-6.67946672 -12.43876934 4.15004015 0 0 62
-6.71957541 -12.43984413 4.14411354 0 0 61
-6.75183725 -12.44027519 4.13828611 0 0 60
-6.80625582 -12.44216919 4.13047981 0 0 61
-6.84452677 -12.44367313 4.12299299 0 0 61
-6.89163256 -12.44490623 4.11720657 0 0 58
-7.24098253 -12.46197701 4.05786467 0 0 61
-7.26130533 -12.46387100 4.05432606 0 0 60
-7.29122591 -12.46511269 4.05018950 0 0 59
-7.32154799 -12.46770763 4.04596090 0 0 61
-7.33971262 -12.46953773 4.04301977 0 0 62
-7.36160231 -12.47101402 4.04007721 0 0 62
-7.39296198 -12.47321033 4.03451777 0 0 61
-7.41570139 -12.47515297 4.03134394 0 0 61
-7.43431997 -12.47610664 4.02826929 0 0 60
-7.46402216 -12.47786045 4.02004862 0 0 59
-7.49219084 -12.48039150 4.01641703 0 0 59
-7.50442839 -12.48201370 4.01718903 0 0 59
-7.53673887 -12.48295116 4.00823927 0 0 61
-7.56033182 -12.48536873 4.00483704 0 0 59
-7.58064890 -12.48726368 4.00129461 0 0 59
-7.59778070 -12.48949432 3.99968433 0 0 58
-7.61724806 -12.49091721 3.99637556 0 0 58
-7.63626528 -12.49321938 3.99320078 0 0 57
-7.65685320 -12.49510384 3.99062586 0 0 56
-7.67932558 -12.49706268 3.98648882 0 0 56
-7.69860888 -12.49935341 3.98427916 0 0 56
-7.72023153 -12.50083733 3.98037434 0 0 56
-7.73579359 -12.50348854 3.97816229 0 0 57
-7.75265455 -12.50573349 3.97558880 0 0 58
-7.77108526 -12.50755310 3.97360849 0 0 59
-7.79882002 -12.50837326 3.96488571 0 0 58
-7.80611467 -12.51162529 3.96808910 0 0 57
-7.83469915 -12.51291943 3.95913696 0 0 55
-7.85398245 -12.51521301 3.95692778 0 0 56
-7.86698961 -12.51644707 3.95540857 0 0 56
-7.88254881 -12.51909924 3.95319653 0 0 56
-7.89986277 -12.52045631 3.95048571 0 0 56
-7.91888189 -12.52276230 3.94731236 0 0 58
-7.93659449 -12.52547455 3.94450569 0 0 58
-7.94829893 -12.52712059 3.94335079 0 0 57
-7.96600866 -12.52983284 3.94054461 0 0 57
-7.97744703 -12.53148651 3.93842554 0 0 57
-7.99300432 -12.53413677 3.93621635 0 0 57
-8.01688194 -12.53395462 3.92855549 0 0 57
-8.01999855 -12.53844643 3.93189049 0 0 58
-8.04584694 -12.53919220 3.92473269 0 0 56
-8.05840302 -12.54130745 3.92334700 0 0 57
-8.07611656 -12.54402161 3.92054081 0 0 59
-8.08912277 -12.54525566 3.91902447 0 0 60
-8.10571671 -12.54751015 3.91548300 0 0 61
-8.11912537 -12.55009842 3.91386795 0 0 59
-8.13140869 -12.55222416 3.91152048 0 0 59
-8.14050674 -12.55468941 3.91109896 0 0 58
-8.15782166 -12.55604744 3.90838766 0 0 58
-8.16619873 -12.55940437 3.90713835 0 0 56
-8.17763710 -12.56105995 3.90502167 0 0 56
-8.19404602 -12.56418037 3.90258074 0 0 56
-8.19816780 -12.56517887 3.90248632 0 0 56
-8.21130562 -12.56777668 3.89990854 0 0 57
-8.22040367 -12.57024288 3.89948702 0 0 57
-8.24324608 -12.57045460 3.89315462 0 0 56
-8.25468254 -12.57211113 3.89103794 0 0 56
-8.26135635 -12.57452202 3.89025068 0 0 56
-8.28292656 -12.57824135 3.88638544 0 0 56
-8.28941727 -12.58152485 3.88669538 0 0 57
-8.29673004 -12.58218193 3.88467360 0 0 57
-8.30726051 -12.58560181 3.88282824 0 0 57
-8.31290054 -12.58841324 3.88337135 0 0 57
-8.31845856 -12.59036446 3.88185167 0 0 58
-8.33702278 -12.59354973 3.87881422 0 0 58
-8.33984375 -12.59495449 3.87908363 0 0 58
-8.34885788 -12.59655666 3.87659979 0 0 59
-8.35404587 -12.60024929 3.87727594 0 0 61
-8.36678314 -12.60149384 3.87479639 0 0 62
-8.37170410 -12.60519791 3.87451124 0 0 63
-8.38170433 -12.60589790 3.87381887 0 0 62
-8.39627647 -12.60945034 3.86981487 0 0 60
-8.41156960 -12.61211395 3.86664152 0 0 58
-8.41290092 -12.61479950 3.86837721 0 0 57
-8.42425346 -12.61559486 3.86419916 0 0 58
-8.43941689 -12.61689091 3.86208200 0 0 58
-8.43563461 -12.61948204 3.86212206 0 0 58
-8.45231438 -12.62259674 3.86064243 0 0 57
-8.45845222 -12.62502861 3.85793018 0 0 57
-8.47765541 -12.62646103 3.85365582 0 0 56
-8.46364403 -12.62872124 3.85860634 0 0 56
-8.47071648 -12.63248634 3.85772276 0 0 57
-8.48124504 -12.63590622 3.85587692 0 0 58
-8.47585106 -12.63841629 3.85843801 0 0 59
-8.49590111 -12.64031696 3.85393476 0 0 59
-8.50589752 -12.64375687 3.85016108 0 0 58
-8.51608467 -12.64358902 3.84837389 0 0 59
-8.51688194 -12.64629364 3.84818077 0 0 57
-8.52916718 -12.64842033 3.84583616 0 0 58
-8.51001930 -12.65591812 3.85122681 0 0 57
-8.53573799 -12.65530205 3.84512472 0 0 57
-8.51597786 -12.65922165 3.84961176 0 0 56
-8.53413963 -12.66105461 3.84666681 0 0 57
-8.52991104 -12.66452599 3.84684038 0 0 57
-8.52033615 -12.66827869 3.84953547 0 0 57
-8.54039001 -12.67018127 3.84503412 0 0 58
-8.52017403 -12.67498207 3.84965420 0 0 58
-8.55581284 -12.67420769 3.84080029 0 0 58
-8.52719498 -12.68098068 3.84880972 0 0 58
-8.54142189 -12.68094635 3.84486341 0 0 58
-8.56623459 -12.68209553 3.83903313 0 0 58
-8.50093842 -12.69278526 3.85414457 0 0 57
-8.54636383 -12.69048309 3.84359646 0 0 57
-8.54083061 -12.69436836 3.84413528 0 0 57
-8.53359604 -12.69730854 3.84513474 0 0 56
-8.52572250 -12.70200348 3.84737110 0 0 57
-8.52912521 -12.70388889 3.84644556 0 0 58
-8.51151848 -12.70787048 3.85033560 0 0 58
-8.50638199 -12.71310711 3.85078001 0 0 57
-8.46919823 -12.72013855 3.85805464 0 0 58
-8.50874710 -12.71813202 3.84810305 0 0 57
-8.44493675 -12.72753811 3.86175013 0 0 58
-8.42687988 -12.73240185 3.86577272 0 0 58
-8.46310043 -12.73211098 3.85572481 0 0 58
-8.37828064 -12.74361038 3.87418222 0 0 59
-8.41868210 -12.74207878 3.86399841 0 0 58
-8.40551186 -12.74755096 3.86563349 0 0 59
-6.56522989 -12.43748665 4.16821527 0 0 61
-6.60296583 -12.43900871 4.15880442 0 0 62
-6.66802263 -12.43985176 4.14907265 0 0 63
-6.70917177 -12.44052505 4.14181900 0 0 61
-6.74255037 -12.44141865 4.13672304 0 0 60
-6.80042696 -12.44296837 4.12795210 0 0 62
-6.83915091 -12.44358826 4.12033319 0 0 61
-6.88841295 -12.44488907 4.11395073 0 0 58
-7.24448919 -12.46213055 4.05377865 0 0 61
-7.26611376 -12.46361542 4.04987431 0 0 60
-7.29603624 -12.46485710 4.04573965 0 0 59
-7.32550573 -12.46698189 4.04174328 0 0 61
-7.34497309 -12.46840477 4.03843260 0 0 62
-7.36686087 -12.46987534 4.03549242 0 0 62
-7.39907122 -12.47254753 4.02970171 0 0 61
-7.42181158 -12.47449207 4.02653027 0 0 61
-7.44128180 -12.47591209 4.02322054 0 0 59
-7.47125483 -12.47765827 4.01596594 0 0 59
-7.49960756 -12.47932148 4.01123285 0 0 60
-7.51296282 -12.48140526 4.01274014 0 0 60
-7.54396868 -12.48274994 4.00415659 0 0 61
-7.56886530 -12.48476028 4.00038624 0 0 59
-7.58918619 -12.48665428 3.99684715 0 0 59
-7.60716486 -12.48935509 3.99500227 0 0 58
-7.62532854 -12.49118805 3.99206161 0 0 58
-7.64610147 -12.49220085 3.98838520 0 0 56
-7.66538572 -12.49449158 3.98617601 0 0 55
-7.68786001 -12.49645042 3.98204088 0 0 55
-7.70844793 -12.49833393 3.97946501 0 0 55
-7.72961664 -12.50070000 3.97569466 0 0 57
-7.74563074 -12.50246906 3.97334719 0 0 58
-7.76163912 -12.50424004 3.97100306 0 0 58
-7.78065538 -12.50654030 3.96783161 0 0 59
-7.80735445 -12.50776196 3.96043730 0 0 58
-7.81568384 -12.51061535 3.96231031 0 0 57
-7.84669065 -12.51196098 3.95372438 0 0 56
-7.86512232 -12.51378059 3.95174503 0 0 56
-7.87767935 -12.51589584 3.95036316 0 0 56
-7.89454031 -12.51814079 3.94778585 0 0 56
-7.91270685 -12.51997185 3.94484425 0 0 57
-7.92956781 -12.52221298 3.94226599 0 0 58
-7.94643450 -12.52445412 3.93969011 0 0 58
-7.96114016 -12.52663231 3.93770981 0 0 57
-7.97715235 -12.52840233 3.93536425 0 0 57
-7.98970556 -12.53051853 3.93398237 0 0 57
-8.00526428 -12.53317070 3.93176889 0 0 57
-8.02999496 -12.53345871 3.92387390 0 0 57
-8.03199196 -12.53748703 3.92647839 0 0 57
-8.06129646 -12.53788567 3.91835737 0 0 56
-8.07151222 -12.54081154 3.91866779 0 0 57
-8.08810616 -12.54306412 3.91512823 0 0 58
-8.09981155 -12.54471016 3.91397619 0 0 60
-8.11555672 -12.54648972 3.91066599 0 0 60
-8.13111496 -12.54913902 3.90845537 0 0 59
-8.14497185 -12.55084610 3.90670538 0 0 59
-8.15380287 -12.55332375 3.90532160 0 0 59
-8.17066383 -12.55556393 3.90274668 0 0 59
-8.18106270 -12.55762005 3.90195847 0 0 57
-8.19335175 -12.55974388 3.89961290 0 0 56
-8.20891190 -12.56239319 3.89740038 0 0 57
-8.21361732 -12.56387329 3.89611292 0 0 57
-8.22571945 -12.56687260 3.89486265 0 0 57
-8.23481369 -12.56933403 3.89444208 0 0 56
-8.25869560 -12.56914902 3.88678360 0 0 56
-8.26994705 -12.57167435 3.88576174 0 0 56
-8.27577019 -12.57361603 3.88520622 0 0 56
-8.29733849 -12.57733631 3.88134050 0 0 56
-8.30486679 -12.58021927 3.88032103 0 0 56
-8.31244659 -12.58086777 3.87926340 0 0 56
-8.32297707 -12.58428574 3.87741756 0 0 56
-8.32992172 -12.58668900 3.87759304 0 0 56
-8.33632851 -12.58910847 3.87584257 0 0 56
-8.35534668 -12.59141350 3.87267065 0 0 57
-8.35901642 -12.59329033 3.87270832 0 0 57
-8.36672974 -12.59530258 3.87059259 0 0 58
-8.37021255 -12.59805393 3.87172985 0 0 59
-8.38164902 -12.59970760 3.86961460 0 0 60
-8.38656807 -12.60340881 3.86932898 0 0 61
-8.39715385 -12.60459137 3.86744261 0 0 62
-8.41545105 -12.60778809 3.86344147 0 0 61
-8.42988968 -12.60997772 3.86049986 0 0 60
-8.43207359 -12.61313534 3.86200190 0 0 58
-8.44127464 -12.61386871 3.85842133 0 0 58
-8.45616722 -12.61517715 3.85534239 0 0 59
-8.45592880 -12.61828232 3.85648203 0 0 58
-8.47409248 -12.62011528 3.85353613 0 0 58
-8.48004723 -12.62341595 3.85192108 0 0 57
-8.49898529 -12.62486076 3.84668684 0 0 57
-8.48653984 -12.62670040 3.85223484 0 0 56
-8.49119568 -12.63041401 3.85098314 0 0 57
-8.50302887 -12.63342285 3.84877348 0 0 59
-8.49417114 -12.63627815 3.85229731 0 0 60
-8.51422310 -12.63818359 3.84779358 0 0 59
-8.52637482 -12.64168453 3.84342384 0 0 60
-8.53611183 -12.64239693 3.84176970 0 0 61
-8.53820801 -12.64469528 3.84121227 0 0 59
-8.54964828 -12.64634895 3.83909464 0 0 59
-8.53336906 -12.65301704 3.84472036 0 0 58
-8.55863571 -12.65328026 3.83875322 0 0 58
-8.54102707 -12.65726471 3.84264231 0 0 57
-8.55807495 -12.65863323 3.83896494 0 0 58
-8.55496407 -12.66256905 3.83987284 0 0 58
-8.54669189 -12.66590881 3.84220266 0 0 58
-8.56589127 -12.66734314 3.83793306 0 0 58
-8.54783058 -12.67220497 3.84195280 0 0 58
-8.58001137 -12.67177582 3.83406210 0 0 59
-8.55485535 -12.67820454 3.84110928 0 0 59
-8.56620598 -12.67899990 3.83693409 0 0 59
-8.59232330 -12.67973709 3.83073378 0 0 58
-8.53577805 -12.68929958 3.84548187 0 0 57
-8.57748032 -12.68736076 3.83493376 0 0 58
-8.57221413 -12.69123077 3.83643532 0 0 58
-8.56928635 -12.69429779 3.83624315 0 0 57
-8.55926132 -12.69892788 3.83907413 0 0 57
-8.56526947 -12.69999695 3.83741808 0 0 57
-8.54851341 -12.70444965 3.84107542 0 0 57
-8.54840660 -12.70892048 3.84115458 0 0 57
-8.51010323 -12.71548748 3.84769917 0 0 57
-8.55207062 -12.71353722 3.83811235 0 0 57
-8.49414444 -12.72264671 3.85116243 0 0 58
-8.48299599 -12.72681808 3.85326004 0 0 58
-8.51706505 -12.72645950 3.84380960 0 0 58
-8.43094444 -12.73837471 3.86263466 0 0 58
-8.47479820 -12.73649311 3.85148859 0 0 58
-8.44798660 -12.74248314 3.85587692 0 0 58
-8.42875481 -12.74911690 3.85920858 0 0 60
-8.43718529 -12.75024033 3.85792160 0 0 60
-6.54575491 -12.43880272 4.16844034 0 0 62
-6.58237410 -12.43986320 4.15829802 0 0 62
-6.65546465 -12.44047642 4.14737463 0 0 63
-6.69615984 -12.44202995 4.14025688 0 0 62
-6.72999048 -12.44204140 4.13502598 0 0 60
-6.79289579 -12.44282150 4.12588978 0 0 61
-6.83332014 -12.44438744 4.11780596 0 0 61
-6.88415194 -12.44526482 4.11202145 0 0 59
-7.26877069 -12.46330261 4.04602289 0 0 60
-7.29954290 -12.46501350 4.04165697 0 0 60
-7.32900953 -12.46713734 4.03765774 0 0 60
-7.34848070 -12.46855927 4.03434992 0 0 61
-7.37252283 -12.47009468 4.03081179 0 0 61
-7.40500212 -12.47275352 4.02598286 0 0 62
-7.42662287 -12.47423744 4.02207947 0 0 61
-7.44851542 -12.47571373 4.01913595 0 0 60
-7.47736788 -12.47699356 4.01114988 0 0 60
-7.50683737 -12.47911835 4.00715160 0 0 61
-7.51992559 -12.48121262 4.00769424 0 0 60
-7.55093241 -12.48255920 3.99911070 0 0 62
-7.57583094 -12.48456764 3.99533939 0 0 60
-7.59641504 -12.48644829 3.99276400 0 0 60
-7.61700296 -12.48833561 3.99018908 0 0 59
-7.63386583 -12.49057579 3.98761177 0 0 57
-7.65548563 -12.49205780 3.98370695 0 0 55
-7.67392111 -12.49388123 3.98172712 0 0 55
-7.69639444 -12.49583912 3.97759199 0 0 55
-7.71756506 -12.49820423 3.97382069 0 0 55
-7.73815107 -12.50008774 3.97124529 0 0 58
-7.75546408 -12.50144768 3.96853495 0 0 58
-7.77102327 -12.50409698 3.96632099 0 0 58
-7.79049635 -12.50552177 3.96301413 0 0 59
-7.81804419 -12.50721359 3.95539188 0 0 56
-7.82663870 -12.51005363 3.95822811 0 0 57
-7.85783148 -12.51052856 3.94854355 0 0 56
-7.87581396 -12.51323414 3.94670105 0 0 57
-7.88836908 -12.51535034 3.94531631 0 0 57
-7.90653372 -12.51718140 3.94237423 0 0 57
-7.92339468 -12.51942253 3.93979692 0 0 58
-7.94025850 -12.52166462 3.93722010 0 0 58
-7.95712042 -12.52390385 3.93464231 0 0 58
-7.97227716 -12.52520275 3.93253040 0 0 57
-7.98783922 -12.52785492 3.93031931 0 0 57
-8.00142670 -12.52956772 3.92760324 0 0 57
-8.01725578 -12.53221130 3.92635775 0 0 57
-8.04198647 -12.53249550 3.91846418 0 0 57
-8.04685974 -12.53569794 3.92129946 0 0 56
-8.07355499 -12.53691864 3.91390800 0 0 57
-8.08395576 -12.53897285 3.91312075 0 0 57
-8.10140419 -12.54169655 3.90935040 0 0 57
-8.11180305 -12.54375076 3.90856457 0 0 59
-8.12866592 -12.54599190 3.90598679 0 0 59
-8.14395905 -12.54865456 3.90281296 0 0 59
-8.15781212 -12.55035782 3.90106440 0 0 59
-8.16606140 -12.55235004 3.90087271 0 0 60
-8.18310738 -12.55372334 3.89719820 0 0 59
-8.19521141 -12.55672169 3.89594889 0 0 58
-8.20906639 -12.55842590 3.89420271 0 0 57
-8.22220421 -12.56102562 3.89162397 0 0 58
-8.22717667 -12.56249428 3.89129877 0 0 57
-8.24058533 -12.56508255 3.88968515 0 0 57
-8.25026131 -12.56802750 3.88806820 0 0 56
-8.27395821 -12.56871414 3.88150549 0 0 56
-8.28539276 -12.57036972 3.87938881 0 0 56
-8.29121780 -12.57230949 3.87883139 0 0 56
-8.31278801 -12.57603073 3.87496662 0 0 55
-8.32188606 -12.57849407 3.87454367 0 0 55
-8.32874489 -12.58003330 3.87265968 0 0 55
-8.33999634 -12.58256054 3.87164068 0 0 55
-8.34752464 -12.58544540 3.87062311 0 0 56
-8.35465240 -12.58697319 3.86970091 0 0 56
-8.37406731 -12.59063339 3.86642885 0 0 57
-8.37818718 -12.59162712 3.86633635 0 0 57
-8.38401413 -12.59356594 3.86577892 0 0 57
-8.38808250 -12.59679890 3.86572647 0 0 58
-8.40036964 -12.59892654 3.86337614 0 0 57
-8.40358925 -12.60168457 3.86355209 0 0 59
-8.41417313 -12.60286522 3.86166811 0 0 61
-8.43246841 -12.60606194 3.85766459 0 0 62
-8.44776344 -12.60872459 3.85448885 0 0 61
-8.45039749 -12.61100101 3.85586023 0 0 58
-8.46044731 -12.61220551 3.85204649 0 0 58
-8.47449112 -12.61304092 3.84920168 0 0 59
-8.47555542 -12.61573887 3.84997272 0 0 59
-8.49326897 -12.61845016 3.84716606 0 0 60
-8.50052643 -12.62134743 3.84518051 0 0 59
-8.51860809 -12.62231636 3.84017897 0 0 58
-8.50786781 -12.62510204 3.84526110 0 0 57
-8.51193619 -12.62833023 3.84520817 0 0 59
-8.52462387 -12.63181305 3.84276533 0 0 61
-8.51549911 -12.63467979 3.84532595 0 0 61
-8.53424644 -12.63699150 3.84118986 0 0 59
-8.54339218 -12.63995934 3.83764553 0 0 61
-8.55227852 -12.64019871 3.83622456 0 0 61
-8.55653191 -12.64255905 3.83506918 0 0 61
-8.56881714 -12.64468575 3.83272171 0 0 60
-8.55469894 -12.65141678 3.83774996 0 0 58
-8.58126450 -12.65127182 3.83141756 0 0 59
-8.56496048 -12.65484238 3.83493996 0 0 58
-8.57966995 -12.65702343 3.83296156 0 0 58
-8.57674408 -12.66008949 3.83276558 0 0 58
-8.57089233 -12.66347885 3.83546686 0 0 58
-8.58963966 -12.66579247 3.83132696 0 0 59
-8.57418823 -12.66983700 3.83461857 0 0 58
-8.60506248 -12.66981792 3.82709360 0 0 59
-8.57748413 -12.67619419 3.83377361 0 0 59
-8.58910370 -12.67697906 3.83056068 0 0 58
-8.61782646 -12.67689705 3.82363129 0 0 58
-8.56689644 -12.68617439 3.83681917 0 0 58
-8.60383606 -12.68499088 3.82759857 0 0 58
-8.59987259 -12.68845654 3.82873440 0 0 58
-8.59851456 -12.69110012 3.82914019 0 0 57
-8.59252739 -12.69586563 3.82981348 0 0 57
-8.59880638 -12.69692421 3.82912302 0 0 57
-8.58420181 -12.70143795 3.83218288 0 0 57
-8.58625031 -12.70597267 3.83166361 0 0 57
-8.55297279 -12.71177387 3.83784342 0 0 57
-8.59494400 -12.70981979 3.82825613 0 0 57
-8.53720093 -12.71806049 3.84021235 0 0 57
-8.52978134 -12.72187233 3.84230757 0 0 58
-8.56209183 -12.72280884 3.83336020 0 0 58
-8.49051857 -12.73243999 3.84916019 0 0 58
-8.53091621 -12.73090744 3.83898115 0 0 57
-8.50782967 -12.73653793 3.84336662 0 0 57
-8.46385956 -12.74562454 3.85150814 0 0 58
-8.46295738 -12.74738884 3.85177851 0 0 59
-8.45872879 -12.75086403 3.85195255 0 0 59
-6.52431345 -12.43918705 4.16816759 0 0 62
-6.55917788 -12.44153786 4.15852308 0 0 63
-6.63787889 -12.44186306 4.14603949 0 0 63
-6.68189859 -12.44170570 4.13901567 0 0 62
-6.71743155 -12.44266701 4.13332367 0 0 61
-6.78249025 -12.44350719 4.12359333 0 0 61
-6.82506990 -12.44513416 4.11491442 0 0 61
-6.87850809 -12.44519520 4.10839701 0 0 59
-7.30304670 -12.46516991 4.03757334 0 0 60
-7.33297014 -12.46640873 4.03343821 0 0 60
-7.35243940 -12.46783352 4.03013039 0 0 60
-7.37648249 -12.46937180 4.02659321 0 0 60
-7.40980864 -12.47249985 4.02153540 0 0 63
-7.43300200 -12.47356415 4.01822710 0 0 61
-7.45462656 -12.47504997 4.01431990 0 0 60
-7.48348093 -12.47633362 4.00633335 0 0 60
-7.51294947 -12.47845459 4.00233173 0 0 62
-7.52630568 -12.48053932 4.00384092 0 0 61
-7.55731249 -12.48188400 3.99525881 0 0 62
-7.58305883 -12.48436356 3.99125719 0 0 61
-7.60337877 -12.48626137 3.98771620 0 0 60
-7.62396669 -12.48814297 3.98513985 0 0 59
-7.64127874 -12.48950386 3.98243093 0 0 57
-7.66532564 -12.49104118 3.97889090 0 0 55
-7.68218851 -12.49328232 3.97631454 0 0 55
-7.70466089 -12.49523735 3.97217894 0 0 54
-7.72609758 -12.49759483 3.96937227 0 0 55
-7.74583387 -12.49900436 3.96702719 0 0 58
-7.76400042 -12.50083637 3.96408558 0 0 58
-7.78216600 -12.50266743 3.96114111 0 0 58
-7.79772425 -12.50532150 3.95893145 0 0 58
-7.82873201 -12.50666428 3.95034742 0 0 56
-7.83620882 -12.50904465 3.95244884 0 0 56
-7.86766958 -12.50950813 3.94372845 0 0 57
-7.88565016 -12.51221085 3.94188499 0 0 58
-7.90035868 -12.51439095 3.93990612 0 0 57
-7.91767263 -12.51575089 3.93719244 0 0 58
-7.93192816 -12.51880932 3.93534756 0 0 58
-7.95139837 -12.52023506 3.93204069 0 0 58
-7.96826124 -12.52247238 3.92946243 0 0 57
-7.98381853 -12.52512741 3.92725325 0 0 57
-7.99897814 -12.52642059 3.92513752 0 0 57
-8.01238251 -12.52901268 3.92352247 0 0 57
-8.02924728 -12.53125095 3.92094374 0 0 57
-8.05528259 -12.53112984 3.91268730 0 0 57
-8.06100082 -12.53479958 3.91528940 0 0 57
-8.08554840 -12.53595829 3.90849590 0 0 57
-8.09679794 -12.53848648 3.90747976 0 0 56
-8.11496544 -12.54031849 3.90453672 0 0 57
-8.12509918 -12.54238415 3.90278578 0 0 58
-8.14196205 -12.54462528 3.90020752 0 0 58
-8.15751839 -12.54727554 3.89799786 0 0 57
-8.17111015 -12.54899120 3.89528513 0 0 59
-8.18020439 -12.55145359 3.89486647 0 0 61
-8.19752121 -12.55281639 3.89215565 0 0 60
-8.20850372 -12.55535316 3.89017248 0 0 59
-8.22236252 -12.55705833 3.88842154 0 0 58
-8.23504639 -12.56054306 3.88598108 0 0 58
-8.24047470 -12.56112671 3.88551855 0 0 57
-8.25472832 -12.56418610 3.88367462 0 0 57
-8.26597786 -12.56671143 3.88265753 0 0 57
-8.28810501 -12.56781960 3.87549448 0 0 57
-8.30026054 -12.56858158 3.87420845 0 0 56
-8.30608368 -12.57052040 3.87365198 0 0 56
-8.32850647 -12.57471371 3.86955500 0 0 55
-8.33733368 -12.57718658 3.86817074 0 0 55
-8.34445953 -12.57871819 3.86724901 0 0 55
-8.35656357 -12.58171558 3.86599970 0 0 55
-8.36454201 -12.58371830 3.86484671 0 0 56
-8.37121964 -12.58613300 3.86405849 0 0 56
-8.39023590 -12.58843422 3.86088705 0 0 57
-8.39363670 -12.59032249 3.85996151 0 0 57
-8.39946365 -12.59226227 3.85940647 0 0 57
-8.40595436 -12.59554577 3.85971785 0 0 56
-8.41954231 -12.59726524 3.85700369 0 0 56
-8.42361259 -12.60049438 3.85694885 0 0 58
-8.43073845 -12.60202408 3.85602713 0 0 59
-8.44818306 -12.60474777 3.85225725 0 0 62
-8.46451187 -12.60700703 3.84775305 0 0 62
-8.47042084 -12.60980892 3.84925461 0 0 60
-8.47962189 -12.61054230 3.84567595 0 0 60
-8.49393082 -12.61136818 3.84379101 0 0 60
-8.49427414 -12.61495590 3.84373236 0 0 61
-8.51158905 -12.61631775 3.84102106 0 0 63
-8.51839638 -12.62009048 3.83917665 0 0 61
-8.53647995 -12.62106228 3.83417130 0 0 60
-8.52573776 -12.62384605 3.83925486 0 0 59
-8.52953911 -12.62708664 3.83823681 0 0 60
-8.54294395 -12.62967682 3.83662271 0 0 62
-8.53597450 -12.63260460 3.83858824 0 0 62
-8.55472565 -12.63492012 3.83445024 0 0 59
-8.55996323 -12.63911724 3.83200359 0 0 60
-8.56929398 -12.63847256 3.83044815 0 0 59
-8.57440376 -12.64130402 3.82906008 0 0 60
-8.58668900 -12.64343166 3.82671595 0 0 59
-8.57517242 -12.64934254 3.83100939 0 0 58
-8.59958839 -12.64913750 3.82527399 0 0 59
-8.58700943 -12.65235138 3.82879877 0 0 59
-8.60014534 -12.65495014 3.82622051 0 0 58
-8.59833527 -12.65847778 3.82676077 0 0 57
-8.59221840 -12.66187668 3.82849550 0 0 58
-8.61056900 -12.66283798 3.82445288 0 0 58
-8.59793472 -12.66828537 3.82801580 0 0 59
-8.62684250 -12.66733551 3.81998873 0 0 58
-8.60298920 -12.67335606 3.82667017 0 0 58
-8.61676216 -12.67420197 3.82285881 0 0 57
-8.64418030 -12.67452908 3.81629515 0 0 57
-8.59370232 -12.68292618 3.82934713 0 0 59
-8.63018990 -12.68262291 3.82026386 0 0 58
-8.62968636 -12.68574047 3.82043791 0 0 58
-8.62572098 -12.68920422 3.82157564 0 0 58
-8.62306023 -12.69225883 3.82234287 0 0 57
-8.62992096 -12.69379902 3.82045889 0 0 57
-8.61747360 -12.69837475 3.82292509 0 0 57
-8.61997032 -12.70202827 3.82227135 0 0 57
-8.59472847 -12.70759773 3.82725430 0 0 57
-8.62847900 -12.70674896 3.81996250 0 0 58
-8.58137512 -12.71393871 3.82999086 0 0 57
-8.57265282 -12.71815872 3.83245420 0 0 57
-8.60326195 -12.71814919 3.82396364 0 0 57
-8.54187775 -12.72760963 3.83797932 0 0 57
-8.57926941 -12.72554398 3.82862329 0 0 57
-8.56394577 -12.73095131 3.83085680 0 0 58
-8.52128410 -12.73963070 3.83862925 0 0 58
-8.51750565 -12.74222088 3.83866978 0 0 58
-8.49199677 -12.74779987 3.84269094 0 0 58
-8.48633003 -12.75032043 3.84428978 0 0 59
-6.53858423 -12.44239235 4.15801764 0 0 63
-6.61598444 -12.44312859 4.14589643 0 0 63
-6.66458082 -12.44308472 4.13864708 0 0 63
-6.70226717 -12.44410610 4.13235903 0 0 62
-6.76862860 -12.44453812 4.12225723 0 0 61
-6.81623697 -12.44539833 4.11321497 0 0 61
-6.87182665 -12.44552040 4.10610342 0 0 60
-7.30570555 -12.46485519 4.03371859 0 0 60
-7.33732843 -12.46704102 4.02912426 0 0 60
-7.35594606 -12.46798992 4.02604532 0 0 60
-7.37999105 -12.46952534 4.02250814 0 0 59
-7.41376925 -12.47177315 4.01731539 0 0 62
-7.43781137 -12.47331047 4.01377773 0 0 61
-7.45943403 -12.47479534 4.00987005 0 0 60
-7.48855639 -12.47606850 4.00284624 0 0 61
-7.51775980 -12.47820091 3.99788332 0 0 61
-7.53241777 -12.47987747 3.99902487 0 0 62
-7.56427813 -12.48169327 3.99020910 0 0 61
-7.58832312 -12.48323154 3.98667192 0 0 61
-7.61061144 -12.48605919 3.98363256 0 0 61
-7.63034487 -12.48747063 3.98128891 0 0 60
-7.64851236 -12.48930359 3.97834778 0 0 57
-7.67340708 -12.49131012 3.97457695 0 0 55
-7.69072199 -12.49267197 3.97186565 0 0 55
-7.71319628 -12.49462605 3.96772814 0 0 54
-7.73378325 -12.49651146 3.96515226 0 0 54
-7.75279665 -12.49881077 3.96197891 0 0 57
-7.77096224 -12.50064659 3.95903635 0 0 58
-7.78912973 -12.50247574 3.95609522 0 0 58
-7.80514002 -12.50424767 3.95374823 0 0 57
-7.83856916 -12.50564384 3.94553041 0 0 55
-7.84604692 -12.50802326 3.94763517 0 0 56
-7.87705183 -12.50937080 3.93904972 0 0 58
-7.89503431 -12.51207542 3.93720341 0 0 58
-7.91019487 -12.51336861 3.93509102 0 0 58
-7.92705774 -12.51561165 3.93251514 0 0 58
-7.94176817 -12.51779079 3.93053102 0 0 58
-7.96208429 -12.51968479 3.92699480 0 0 57
-7.98110342 -12.52198887 3.92381907 0 0 57
-7.99496031 -12.52369690 3.92207193 0 0 58
-8.01051712 -12.52634621 3.91986084 0 0 58
-8.02307320 -12.52846432 3.91847658 0 0 58
-8.03993416 -12.53070259 3.91589975 0 0 57
-8.06708527 -12.53104401 3.90837288 0 0 58
-8.07169151 -12.53425312 3.91024446 0 0 58
-8.09753799 -12.53500175 3.90308189 0 0 57
-8.10879135 -12.53752899 3.90206575 0 0 57
-8.12695694 -12.53936195 3.89912510 0 0 58
-8.13794136 -12.54189682 3.89714432 0 0 58
-8.15480042 -12.54413795 3.89456701 0 0 57
-8.17081451 -12.54590893 3.89222002 0 0 57
-8.18466949 -12.54761505 3.89047098 0 0 58
-8.19350052 -12.55008507 3.88908625 0 0 61
-8.21036339 -12.55233002 3.88651228 0 0 61
-8.22161293 -12.55485439 3.88549376 0 0 60
-8.23435211 -12.55609989 3.88301277 0 0 59
-8.24991035 -12.55875111 3.88080168 0 0 59
-8.25488472 -12.56022072 3.88047457 0 0 58
-8.27017784 -12.56288338 3.87730122 0 0 57
-8.27927589 -12.56534386 3.87687826 0 0 57
-8.30211639 -12.56555939 3.87054825 0 0 57
-8.31440544 -12.56768417 3.86820173 0 0 57
-8.32049751 -12.56961536 3.86860847 0 0 57
-8.34337044 -12.57292557 3.86437511 0 0 56
-8.35259819 -12.57675171 3.86289501 0 0 55
-8.36148071 -12.57699490 3.86147118 0 0 55
-8.37201309 -12.58041096 3.85962534 0 0 55
-8.38026047 -12.58240223 3.85943747 0 0 55
-8.38608360 -12.58434200 3.85887957 0 0 56
-8.40438080 -12.58753681 3.85487509 0 0 57
-8.40850258 -12.58853436 3.85478258 0 0 56
-8.41648102 -12.59053802 3.85362864 0 0 56
-8.42512512 -12.59387684 3.85334206 0 0 56
-8.43741417 -12.59600830 3.85099602 0 0 56
-8.44193459 -12.59835815 3.85080767 0 0 57
-8.44906235 -12.59988785 3.84988403 0 0 58
-8.46390152 -12.60343170 3.84684420 0 0 61
-8.48022842 -12.60569286 3.84233904 0 0 63
-8.48744011 -12.60808372 3.84347820 0 0 62
-8.49664116 -12.60881615 3.83990002 0 0 62
-8.51265144 -12.61058521 3.83755207 0 0 62
-8.51129532 -12.61323166 3.83795595 0 0 63
-8.52730560 -12.61499882 3.83561182 0 0 64
-8.53541756 -12.61836529 3.83339834 0 0 63
-8.55349922 -12.61933899 3.82839441 0 0 61
-8.54360962 -12.62259102 3.83324862 0 0 60
-8.54655838 -12.62536240 3.83245802 0 0 61
-8.55969810 -12.62796021 3.82988214 0 0 63
-8.55169106 -12.63128853 3.83317614 0 0 62
-8.57304955 -12.63278580 3.82830572 0 0 59
-8.57958794 -12.63656902 3.82549620 0 0 58
-8.59062386 -12.63687325 3.82347679 0 0 58
-8.59384346 -12.63963127 3.82365370 0 0 58
-8.60527992 -12.64128494 3.82153511 0 0 58
-8.59591675 -12.64726067 3.82523489 0 0 58
-8.61876297 -12.64747429 3.81890202 0 0 58
-8.60703087 -12.65115929 3.82219553 0 0 59
-8.62147331 -12.65335083 3.81924868 0 0 57
-8.62096786 -12.65646553 3.81942272 0 0 57
-8.61400032 -12.65939426 3.82138920 0 0 57
-8.63301659 -12.66169930 3.81821442 0 0 57
-8.61886597 -12.66533375 3.82114124 0 0 59
-8.64889145 -12.66484261 3.81384802 0 0 57
-8.63019180 -12.67145920 3.81910276 0 0 57
-8.64311790 -12.67183113 3.81552362 0 0 57
-8.66707993 -12.67250824 3.80992126 0 0 57
-8.61745071 -12.68137836 3.82274532 0 0 59
-8.65654373 -12.68025494 3.81293058 0 0 58
-8.65864754 -12.68255234 3.81237173 0 0 58
-8.65337944 -12.68642807 3.81387377 0 0 58
-8.65026855 -12.69036293 3.81477976 0 0 58
-8.65758133 -12.69102287 3.81275892 0 0 58
-8.64669991 -12.69517899 3.81582117 0 0 57
-8.65005112 -12.69930077 3.81493616 0 0 57
-8.62826538 -12.70452309 3.81895733 0 0 58
-8.65613937 -12.70396996 3.81225967 0 0 58
-8.62079048 -12.71056938 3.82109690 0 0 58
-8.61225128 -12.71391964 3.82246542 0 0 58
-8.63940430 -12.71425724 3.81493711 0 0 57
-8.58650589 -12.72260475 3.82762146 0 0 57
-8.62272644 -12.72230911 3.81757402 0 0 57
-8.60942650 -12.72641563 3.82026911 0 0 57
-8.57740211 -12.73404408 3.82611942 0 0 58
-8.57434273 -12.73574257 3.82698870 0 0 58
-8.54595757 -12.74215031 3.83077669 0 0 58
-8.52835083 -12.74613380 3.83466482 0 0 59
-8.50872231 -12.75141525 3.83809280 0 0 59
-6.59063387 -12.44474125 4.14671898 0 0 63
-6.64353609 -12.44481850 4.13827324 0 0 63
-6.68428087 -12.44413853 4.13111925 0 0 63
-6.75306749 -12.44462681 4.12138700 0 0 61
-6.80282736 -12.44554710 4.11174679 0 0 61
-6.86384344 -12.44625473 4.10417223 0 0 60
-7.34043646 -12.46584320 4.02513456 0 0 60
-7.35945177 -12.46814823 4.02196264 0 0 61
-7.38349867 -12.46968460 4.01842260 0 0 59
-7.41772795 -12.47105026 4.01309538 0 0 61
-7.44177198 -12.47258568 4.00955629 0 0 60
-7.46536398 -12.47500420 4.00615454 0 0 61
-7.49336672 -12.47581482 3.99839830 0 0 60
-7.52257013 -12.47794724 3.99343586 0 0 60
-7.53807974 -12.48009300 3.99434566 0 0 61
-7.57065821 -12.48101997 3.98635674 0 0 61
-7.59398222 -12.48344803 3.98199034 0 0 61
-7.61672258 -12.48539448 3.97881937 0 0 60
-7.63645697 -12.48680687 3.97647142 0 0 60
-7.65592718 -12.48822975 3.97316504 0 0 58
-7.67997217 -12.48976517 3.96962500 0 0 56
-7.69898844 -12.49206829 3.96645260 0 0 55
-7.72172976 -12.49401665 3.96328115 0 0 55
-7.74204779 -12.49590874 3.95973969 0 0 54
-7.76263571 -12.49779320 3.95716238 0 0 56
-7.77949667 -12.50003719 3.95458937 0 0 57
-7.79635954 -12.50227547 3.95201349 0 0 57
-7.81452417 -12.50410938 3.94906998 0 0 56
-7.84925890 -12.50509644 3.94048500 0 0 55
-7.85588503 -12.50700569 3.94281816 0 0 56
-7.88558912 -12.50875759 3.93460131 0 0 58
-7.90487242 -12.51105118 3.93238974 0 0 58
-7.92003107 -12.51234913 3.93027401 0 0 59
-7.93689680 -12.51459026 3.92769766 0 0 58
-7.95375681 -12.51683426 3.92512131 0 0 57
-7.97407770 -12.51872635 3.92158175 0 0 58
-7.99309301 -12.52102947 3.91840982 0 0 58
-8.00434494 -12.52355385 3.91739225 0 0 58
-8.02165985 -12.52491760 3.91468191 0 0 58
-8.03264236 -12.52745247 3.91269827 0 0 58
-8.05192757 -12.52974510 3.91048956 0 0 57
-8.07665825 -12.53003502 3.90259504 0 0 59
-8.08237839 -12.53370285 3.90520000 0 0 58
-8.10953331 -12.53404522 3.89767122 0 0 58
-8.11993027 -12.53609753 3.89688635 0 0 57
-8.13894844 -12.53840065 3.89371109 0 0 58
-8.14934921 -12.54045582 3.89292669 0 0 58
-8.16705894 -12.54316902 3.89012098 0 0 57
-8.18365479 -12.54541969 3.88657904 0 0 57
-8.19535828 -12.54706573 3.88542700 0 0 57
-8.20333672 -12.54906845 3.88427210 0 0 61
-8.22019958 -12.55130959 3.88169622 0 0 61
-8.23275566 -12.55342579 3.88031340 0 0 60
-8.24634743 -12.55514336 3.87759924 0 0 60
-8.26275253 -12.55826759 3.87515783 0 0 59
-8.26902962 -12.55932522 3.87446642 0 0 59
-8.28459167 -12.56197548 3.87225628 0 0 58
-8.29368782 -12.56443977 3.87183523 0 0 57
-8.31653214 -12.56465530 3.86550331 0 0 58
-8.32796860 -12.56630802 3.86338568 0 0 58
-8.33464241 -12.56871796 3.86259890 0 0 57
-8.35536194 -12.57196808 3.85896397 0 0 56
-8.36660957 -12.57449341 3.85794592 0 0 55
-8.37719536 -12.57567883 3.85606194 0 0 55
-8.38687897 -12.57862377 3.85444689 0 0 55
-8.39597511 -12.58108521 3.85402536 0 0 55
-8.40022850 -12.58344650 3.85287046 0 0 55
-8.41879272 -12.58663177 3.84983301 0 0 56
-8.42291451 -12.58762836 3.84973764 0 0 56
-8.43219757 -12.58922005 3.84821892 0 0 56
-8.44142723 -12.59305000 3.84673929 0 0 56
-8.45443153 -12.59428120 3.84522009 0 0 57
-8.45895195 -12.59663105 3.84502935 0 0 57
-8.46608162 -12.59815979 3.84410763 0 0 57
-8.48177147 -12.60217762 3.84083414 0 0 59
-8.49594498 -12.60437775 3.83692932 0 0 62
-8.50315666 -12.60676956 3.83806753 0 0 63
-8.51235390 -12.60749817 3.83448839 0 0 63
-8.52855301 -12.60840034 3.83104467 0 0 64
-8.52831459 -12.61150551 3.83218145 0 0 64
-8.54387093 -12.61415482 3.82996941 0 0 64
-8.55113220 -12.61705208 3.82798862 0 0 63
-8.57006454 -12.61849213 3.82275200 0 0 62
-8.56192970 -12.62045765 3.82710695 0 0 61
-8.56442833 -12.62410927 3.82645273 0 0 60
-8.57671547 -12.62623405 3.82410574 0 0 62
-8.56956291 -12.63003349 3.82716894 0 0 61
-8.59333801 -12.63158226 3.82266665 0 0 58
-8.60118294 -12.63495827 3.81949043 0 0 57
-8.61110115 -12.63480091 3.81673765 0 0 57
-8.61431885 -12.63755798 3.81691170 0 0 57
-8.62575531 -12.63921356 3.81479692 0 0 57
-8.61508942 -12.64559650 3.81886244 0 0 57
-8.63950539 -12.64539146 3.81312513 0 0 57
-8.62490273 -12.64990425 3.81618738 0 0 59
-8.64136505 -12.65079308 3.81370592 0 0 57
-8.64274788 -12.65398407 3.81231928 0 0 56
-8.63689804 -12.65737438 3.81501627 0 0 57
-8.65609932 -12.65880775 3.81074476 0 0 56
-8.64104271 -12.66420364 3.81394053 0 0 58
-8.67152023 -12.66283226 3.80650997 0 0 57
-8.65223885 -12.66896629 3.81296206 0 0 57
-8.66489601 -12.66934967 3.80841732 0 0 57
-8.68970871 -12.67049789 3.80258894 0 0 56
-8.64295387 -12.67853737 3.81564093 0 0 58
-8.67989540 -12.67735291 3.80641890 0 0 58
-8.68154526 -12.68053436 3.80599880 0 0 58
-8.67888451 -12.68358612 3.80676794 0 0 58
-8.67707253 -12.68711281 3.80730867 0 0 57
-8.68478584 -12.68912697 3.80519152 0 0 57
-8.67521095 -12.69287395 3.80788612 0 0 57
-8.67986298 -12.69658756 3.80663824 0 0 57
-8.65507317 -12.70127296 3.81148863 0 0 58
-8.68770790 -12.69996548 3.80346251 0 0 57
-8.65105629 -12.70697403 3.81266546 0 0 58
-8.64448738 -12.71125412 3.81453085 0 0 57
-8.67770386 -12.71042824 3.80531073 0 0 57
-8.62695503 -12.71883774 3.81740141 0 0 57
-8.66474724 -12.71812439 3.80795145 0 0 57
-8.65144539 -12.72222900 3.81064510 0 0 57
-8.62660408 -12.72914982 3.81553555 0 0 58
-8.62570190 -12.73091125 3.81580544 0 0 58
-8.60122681 -12.73609161 3.81849909 0 0 58
-8.58447075 -12.74054718 3.82215834 0 0 58
-8.55635643 -12.74694252 3.82690716 0 0 59
-8.53542328 -12.75263786 3.83069944 0 0 62
-6.56573248 -12.44546890 4.14740515 0 0 63
-6.61706305 -12.44597340 4.13836622 0 0 63
-6.66238737 -12.44540405 4.13097954 0 0 63
-6.73502398 -12.44689655 4.12018919 0 0 61
-6.78766108 -12.44698906 4.11078167 0 0 61
-6.85213614 -12.44734955 4.10224199 0 0 60
-7.34263945 -12.46640778 4.02141762 0 0 61
-7.36282969 -12.46693993 4.01893663 0 0 61
-7.38772440 -12.46894741 4.01516867 0 0 59
-7.42123461 -12.47120476 4.00901222 0 0 60
-7.44658136 -12.47233295 4.00510836 0 0 59
-7.46932268 -12.47427845 4.00193357 0 0 60
-7.49817514 -12.47555923 3.99394464 0 0 60
-7.52764654 -12.47768211 3.98994875 0 0 60
-7.54445982 -12.47942257 3.99049330 0 0 60
-7.57546854 -12.48076820 3.98190737 0 0 61
-7.60166693 -12.48236656 3.97777128 0 0 61
-7.62283659 -12.48473167 3.97400141 0 0 60
-7.64283895 -12.48613358 3.97262144 0 0 59
-7.66315985 -12.48802757 3.96908188 0 0 57
-7.68720198 -12.48956490 3.96554184 0 0 56
-7.70622015 -12.49186897 3.96236849 0 0 55
-7.73026514 -12.49340439 3.95883274 0 0 56
-7.75143194 -12.49577141 3.95506096 0 0 55
-7.77332640 -12.49724388 3.95211887 0 0 55
-7.78803301 -12.49942207 3.95014000 0 0 56
-7.80489492 -12.50166512 3.94756269 0 0 55
-7.82651758 -12.50315094 3.94365644 0 0 55
-7.85779238 -12.50448227 3.93603563 0 0 55
-7.86527109 -12.50686550 3.93813944 0 0 56
-7.89542723 -12.50773621 3.92978525 0 0 58
-7.91340685 -12.51043987 3.92794037 0 0 58
-7.92915201 -12.51222229 3.92463255 0 0 58
-7.94627905 -12.51445007 3.92301607 0 0 58
-7.96359682 -12.51581192 3.92030764 0 0 58
-7.98391485 -12.51770687 3.91676855 0 0 59
-8.00293159 -12.52000618 3.91359377 0 0 59
-8.01418304 -12.52253532 3.91257524 0 0 58
-8.03104210 -12.52477741 3.91000080 0 0 58
-8.04404831 -12.52601433 3.90848446 0 0 57
-8.06391907 -12.52878761 3.90507841 0 0 58
-8.08649635 -12.52901077 3.89778042 0 0 58
-8.09351921 -12.53227425 3.90001917 0 0 58
-8.12067223 -12.53261375 3.89248991 0 0 58
-8.13173866 -12.53601265 3.89257288 0 0 57
-8.15075493 -12.53831291 3.88940001 0 0 58
-8.16133881 -12.53949833 3.88751650 0 0 58
-8.17905235 -12.54221153 3.88470793 0 0 57
-8.19636917 -12.54357147 3.88199377 0 0 57
-8.20735168 -12.54610634 3.88001299 0 0 57
-8.21429253 -12.54850769 3.88019133 0 0 59
-8.23219109 -12.55035114 3.87628460 0 0 59
-8.24344063 -12.55287743 3.87526798 0 0 59
-8.25815010 -12.55505562 3.87328959 0 0 59
-8.27389526 -12.55683517 3.86997890 0 0 59
-8.27972221 -12.55877495 3.86942053 0 0 59
-8.29815292 -12.56059647 3.86744118 0 0 59
-8.30828667 -12.56266212 3.86569309 0 0 58
-8.32937431 -12.56416607 3.85985899 0 0 59
-8.34126472 -12.56493950 3.85760927 0 0 58
-8.34905434 -12.56781387 3.85755301 0 0 58
-8.37192917 -12.57112312 3.85332108 0 0 56
-8.38075638 -12.57359695 3.85193968 0 0 55
-8.39004135 -12.57519150 3.85042048 0 0 56
-8.39998627 -12.57812405 3.84976768 0 0 55
-8.41012001 -12.58019257 3.84801722 0 0 55
-8.41509247 -12.58166027 3.84769106 0 0 55
-8.43450737 -12.58531570 3.84442091 0 0 55
-8.43836403 -12.58632278 3.84336519 0 0 55
-8.44634056 -12.58832455 3.84220982 0 0 56
-8.45629311 -12.59126091 3.84155798 0 0 56
-8.46903229 -12.59250546 3.83907557 0 0 57
-8.47682190 -12.59537888 3.83902311 0 0 57
-8.48480225 -12.59738255 3.83786821 0 0 57
-8.49964333 -12.60092354 3.83482695 0 0 59
-8.51296616 -12.60265064 3.83115435 0 0 61
-8.51802063 -12.60498047 3.83288860 0 0 63
-8.52721977 -12.60571384 3.82930660 0 0 63
-8.54296494 -12.60749435 3.82599688 0 0 64
-8.54402924 -12.61018753 3.82677031 0 0 64
-8.56219101 -12.61202240 3.82382727 0 0 65
-8.56873512 -12.61580658 3.82101488 0 0 63
-8.58838844 -12.61635876 3.81660843 0 0 62
-8.57894897 -12.61873055 3.82132864 0 0 62
-8.58517265 -12.62202644 3.82067537 0 0 60
-8.59570312 -12.62544250 3.81883001 0 0 61
-8.59004021 -12.62796402 3.82043028 0 0 59
-8.61381721 -12.62951279 3.81592703 0 0 58
-8.62165833 -12.63288689 3.81275034 0 0 57
-8.63053894 -12.63312340 3.81132555 0 0 57
-8.63564682 -12.63595772 3.80994225 0 0 57
-8.64708519 -12.63761330 3.80782843 0 0 56
-8.63641930 -12.64399624 3.81189203 0 0 56
-8.66083336 -12.64378929 3.80615759 0 0 56
-8.64322662 -12.64776993 3.81004286 0 0 57
-8.66184044 -12.64871788 3.80696535 0 0 56
-8.66304016 -12.65278244 3.80667925 0 0 56
-8.65737343 -12.65530109 3.80827665 0 0 56
-8.67769241 -12.65719604 3.80473804 0 0 56
-8.66439247 -12.66130257 3.80743504 0 0 57
-8.69527054 -12.66128445 3.79990816 0 0 56
-8.67486954 -12.66695404 3.80562639 0 0 56
-8.68864632 -12.66780281 3.80181503 0 0 56
-8.71521568 -12.66765881 3.79548311 0 0 56
-8.66774178 -12.67659092 3.80770874 0 0 57
-8.70494843 -12.67539406 3.79945087 0 0 57
-8.70489311 -12.67762852 3.79949093 0 0 58
-8.70281792 -12.68116474 3.79906750 0 0 58
-8.70342827 -12.68474388 3.79997492 0 0 57
-8.71159554 -12.68587685 3.79772234 0 0 57
-8.70201683 -12.68962479 3.80041742 0 0 57
-8.70752144 -12.69380951 3.79893827 0 0 58
-8.68515396 -12.69854832 3.80415630 0 0 57
-8.71863937 -12.69771099 3.79589891 0 0 58
-8.68243980 -12.70383739 3.80496502 0 0 58
-8.67820930 -12.70731163 3.80513763 0 0 57
-8.71209145 -12.70782852 3.79678440 0 0 57
-8.66637039 -12.71546745 3.80851030 0 0 57
-8.70219421 -12.71382332 3.79855585 0 0 58
-8.69275284 -12.71893406 3.80019474 0 0 58
-8.67181778 -12.72462749 3.80398464 0 0 58
-8.67221451 -12.72598076 3.80388832 0 0 58
-8.65127945 -12.73167229 3.80767918 0 0 58
-8.63713074 -12.73530865 3.81060743 0 0 58
-8.61292458 -12.74047470 3.81426191 0 0 59
-8.57241631 -12.74921799 3.82143927 0 0 60
-8.55826569 -12.75285149 3.82436657 0 0 60
-8.56018257 -12.75602150 3.82490778 0 0 57
-6.58798647 -12.44794083 4.13918543 0 0 63
-6.63573122 -12.44742393 4.13216639 0 0 64
-6.71470308 -12.44774246 4.12064505 0 0 62
-6.76837206 -12.44743347 4.10990953 0 0 61
-6.83957911 -12.44796944 4.10054350 0 0 60
-7.36476469 -12.46751308 4.01425457 0 0 62
-7.39037752 -12.46862793 4.01131439 0 0 60
-7.42473936 -12.47136116 4.00492620 0 0 59
-7.45139265 -12.47207832 4.00065756 0 0 59
-7.47327852 -12.47355270 3.99771643 0 0 60
-7.50428915 -12.47489929 3.98913193 0 0 60
-7.53160429 -12.47695827 3.98572636 0 0 60
-7.54926825 -12.47916889 3.98604345 0 0 60
-7.58027601 -12.48051262 3.97745705 0 0 60
-7.60777807 -12.48170280 3.97295475 0 0 61
-7.62790918 -12.48446655 3.97051668 0 0 61
-7.64850092 -12.48635292 3.96793890 0 0 58
-7.67012262 -12.48783684 3.96403599 0 0 57
-7.69416571 -12.48937225 3.96049547 0 0 56
-7.71344995 -12.49166489 3.95828772 0 0 56
-7.73722696 -12.49321365 3.95378399 0 0 57
-7.75911856 -12.49468613 3.95084476 0 0 56
-7.78185606 -12.49663353 3.94766951 0 0 56
-7.79544973 -12.49835205 3.94495726 0 0 55
-7.81316042 -12.50106430 3.94215155 0 0 54
-7.83662271 -12.50211811 3.93980837 0 0 54
-7.86605978 -12.50388527 3.93062305 0 0 55
-7.87465525 -12.50672531 3.93345737 0 0 56
-7.90323877 -12.50801849 3.92450857 0 0 58
-7.92409277 -12.50989246 3.92289400 0 0 58
-7.93898630 -12.51119995 3.91981554 0 0 59
-7.95741892 -12.51302147 3.91783714 0 0 59
-7.97428370 -12.51526356 3.91526031 0 0 59
-7.99329996 -12.51756477 3.91208696 0 0 60
-8.01146698 -12.51939964 3.90914392 0 0 60
-8.02401733 -12.52151203 3.90776205 0 0 58
-8.04088402 -12.52375793 3.90518427 0 0 57
-8.05689240 -12.52552414 3.90283823 0 0 57
-8.07245255 -12.52817726 3.90062618 0 0 58
-8.09790230 -12.52756977 3.89356279 0 0 58
-8.10550880 -12.53131485 3.89460993 0 0 58
-8.13247681 -12.53252602 3.88817978 0 0 58
-8.14503098 -12.53464222 3.88679409 0 0 57
-8.16319656 -12.53647232 3.88385344 0 0 58
-8.17247963 -12.53806686 3.88233232 0 0 58
-8.19104385 -12.54125214 3.87929440 0 0 57
-8.20920944 -12.54308510 3.87635279 0 0 57
-8.22091293 -12.54472828 3.87519979 0 0 57
-8.22843742 -12.54761124 3.87418032 0 0 57
-8.24575615 -12.54897118 3.87146854 0 0 58
-8.25700188 -12.55149841 3.87045383 0 0 58
-8.26929092 -12.55362511 3.86810684 0 0 58
-8.28615379 -12.55586815 3.86552763 0 0 58
-8.29197693 -12.55780602 3.86497498 0 0 59
-8.30929375 -12.55916595 3.86226273 0 0 60
-8.32139397 -12.56216526 3.86101294 0 0 59
-8.34181786 -12.56232738 3.85431194 0 0 59
-8.35437393 -12.56444550 3.85292912 0 0 59
-8.36280251 -12.56556511 3.85164022 0 0 59
-8.38809586 -12.56892586 3.84777641 0 0 57
-8.39516830 -12.57269096 3.84689283 0 0 55
-8.40360260 -12.57381153 3.84560442 0 0 55
-8.41413307 -12.57723045 3.84375954 0 0 55
-8.42498589 -12.57840157 3.84283781 0 0 55
-8.43166161 -12.58081436 3.84204817 0 0 54
-8.44995689 -12.58401108 3.83804750 0 0 55
-8.45538330 -12.58459663 3.83758783 0 0 55
-8.46120834 -12.58653450 3.83702803 0 0 55
-8.46985435 -12.58988190 3.83674431 0 0 56
-8.48344421 -12.59159851 3.83402920 0 0 57
-8.49253845 -12.59406090 3.83361292 0 0 58
-8.50182152 -12.59565544 3.83208990 0 0 58
-8.51666069 -12.59919930 3.82905245 0 0 59
-8.52868080 -12.60133743 3.82574224 0 0 60
-8.53432083 -12.60414505 3.82628345 0 0 61
-8.54221725 -12.60528946 3.82306671 0 0 62
-8.55783081 -12.60570335 3.82081890 0 0 62
-8.55862617 -12.60841179 3.82062578 0 0 64
-8.57849312 -12.61118698 3.81722212 0 0 65
-8.58817291 -12.61413002 3.81560898 0 0 63
-8.60625839 -12.61510468 3.81060076 0 0 63
-8.59812164 -12.61706734 3.81495476 0 0 62
-8.60304070 -12.62077236 3.81467009 0 0 61
-8.61532974 -12.62289810 3.81232214 0 0 61
-8.61032867 -12.62676144 3.81478834 0 0 59
-8.63168716 -12.62825680 3.80991888 0 0 58
-8.64083099 -12.63122368 3.80637693 0 0 57
-8.65101814 -12.63105488 3.80458975 0 0 57
-8.65639114 -12.63387680 3.80416775 0 0 57
-8.66867638 -12.63600159 3.80181932 0 0 56
-8.65846443 -12.64150429 3.80574846 0 0 56
-8.68130875 -12.64171600 3.79941607 0 0 56
-8.66500473 -12.64528656 3.80294132 0 0 56
-8.68473816 -12.64670086 3.80059528 0 0 56
-8.68396759 -12.64982986 3.79980516 0 0 56
-8.67941856 -12.65280914 3.80213547 0 0 56
-8.69947243 -12.65471649 3.79763269 0 0 56
-8.68729210 -12.65928268 3.80106020 0 0 56
-8.71947289 -12.65885544 3.79316950 0 0 56
-8.69906998 -12.66452599 3.79888678 0 0 56
-8.71414948 -12.66496086 3.79470968 0 0 56
-8.73941422 -12.66522884 3.78874302 0 0 56
-8.69351006 -12.67374134 3.80156851 0 0 57
-8.72973251 -12.67344666 3.79151869 0 0 57
-8.73053360 -12.67615509 3.79132748 0 0 57
-8.72786903 -12.67920876 3.79209757 0 0 57
-8.72978592 -12.68237686 3.79263735 0 0 57
-8.73664284 -12.68391705 3.79075336 0 0 57
-8.72837257 -12.68725586 3.79308319 0 0 57
-8.73433113 -12.69055939 3.79146671 0 0 58
-8.71627045 -12.69542694 3.79548931 0 0 58
-8.74499321 -12.69534206 3.78856230 0 0 58
-8.71355438 -12.70071220 3.79630041 0 0 58
-8.71089363 -12.70376682 3.79707098 0 0 57
-8.73974991 -12.70504951 3.78908253 0 0 58
-8.70251465 -12.71157646 3.79948187 0 0 57
-8.73227310 -12.71109390 3.79122257 0 0 58
-8.72588921 -12.71450806 3.79199171 0 0 58
-8.70907974 -12.72119522 3.79568958 0 0 58
-8.70947838 -12.72255135 3.79559231 0 0 58
-8.69330406 -12.72748566 3.79805470 0 0 58
-8.68391418 -12.73036289 3.79965353 0 0 58
-8.66343307 -12.73517227 3.80330896 0 0 58
-8.62664795 -12.74355888 3.81049204 0 0 59
-8.60374451 -12.74831676 3.81377983 0 0 59
-8.58829117 -12.75236320 3.81707191 0 0 59
-8.58706284 -12.75636864 3.81642056 0 0 57
-8.59504318 -12.75837135 3.81526470 0 0 55
-6.57197237 -12.44890976 4.13844872 0 0 63
-6.60580397 -12.44892311 4.13321733 0 0 63
-6.69038820 -12.44895363 4.12013769 0 0 63
-6.74602365 -12.44957733 4.10990143 0 0 62
-6.82356024 -12.44894028 4.09980869 0 0 61
-6.87489367 -12.44944382 4.09076548 0 0 60
-7.39231253 -12.46920681 4.00663233 0 0 61
-7.42869997 -12.47063637 4.00070620 0 0 60
-7.45489645 -12.47223473 3.99657345 0 0 59
-7.47763586 -12.47418118 3.99340296 0 0 59
-7.50806284 -12.47504330 3.98601007 0 0 61
-7.53596258 -12.47758675 3.98141432 0 0 60
-7.55322886 -12.47844219 3.98182154 0 0 59
-7.58580542 -12.47936630 3.97383595 0 0 59
-7.61370707 -12.48191071 3.96923780 0 0 60
-7.63271952 -12.48421669 3.96606684 0 0 61
-7.65461302 -12.48568916 3.96312428 0 0 58
-7.67780352 -12.48675156 3.95981598 0 0 57
-7.70054579 -12.48870087 3.95664454 0 0 57
-7.71956301 -12.49100113 3.95346975 0 0 56
-7.74445868 -12.49301338 3.94970083 0 0 57
-7.76607752 -12.49449539 3.94579458 0 0 58
-7.78823709 -12.49595642 3.94381762 0 0 57
-7.80352926 -12.49862099 3.94064188 0 0 55
-7.82299852 -12.50004387 3.93733406 0 0 53
-7.84704351 -12.50158119 3.93379784 0 0 54
-7.87459135 -12.50327110 3.92617512 0 0 56
-7.88422441 -12.50571632 3.92768097 0 0 57
-7.91092634 -12.50693607 3.92028856 0 0 58
-7.93262911 -12.50927925 3.91844702 0 0 58
-7.94882536 -12.51017761 3.91500139 0 0 59
-7.96568918 -12.51242065 3.91242361 0 0 60
-7.98281717 -12.51465416 3.91081095 0 0 60
-8.00183487 -12.51695633 3.90763569 0 0 60
-8.02000046 -12.51878929 3.90469599 0 0 60
-8.03255463 -12.52090359 3.90331268 0 0 58
-8.05287361 -12.52279854 3.89977169 0 0 57
-8.06758308 -12.52497482 3.89779234 0 0 57
-8.08229065 -12.52715492 3.89581394 0 0 58
-8.10944176 -12.52749443 3.88828659 0 0 58
-8.11646652 -12.53075600 3.89052486 0 0 58
-8.14361572 -12.53109550 3.88299942 0 0 57
-8.15702438 -12.53368568 3.88138342 0 0 58
-8.17518806 -12.53551674 3.87844229 0 0 58
-8.18446922 -12.53710842 3.87692356 0 0 58
-8.20433807 -12.53988266 3.87351847 0 0 57
-8.22120094 -12.54212570 3.87094212 0 0 57
-8.23290253 -12.54377079 3.86979008 0 0 57
-8.24173355 -12.54624557 3.86840343 0 0 57
-8.25774384 -12.54801178 3.86605883 0 0 57
-8.27029800 -12.55012894 3.86467505 0 0 57
-8.28258705 -12.55225849 3.86232996 0 0 57
-8.29899597 -12.55537987 3.85988617 0 0 57
-8.30396843 -12.55684853 3.85956192 0 0 58
-8.32213593 -12.55867958 3.85661936 0 0 60
-8.33338547 -12.56120682 3.85560083 0 0 59
-8.35362244 -12.56224060 3.84999895 0 0 59
-8.36636162 -12.56348610 3.84751797 0 0 59
-8.37676239 -12.56553841 3.84673071 0 0 59
-8.40093803 -12.56843758 3.84213543 0 0 58
-8.41088676 -12.57137489 3.84148169 0 0 55
-8.41905022 -12.57250404 3.83923006 0 0 55
-8.42984772 -12.57591438 3.83834791 0 0 55
-8.43913078 -12.57750702 3.83682680 0 0 54
-8.44710922 -12.57950974 3.83567286 0 0 55
-8.46567345 -12.58269501 3.83263540 0 0 55
-8.47064590 -12.58416176 3.83231068 0 0 55
-8.47777557 -12.58569145 3.83138704 0 0 55
-8.48615265 -12.58904934 3.83013678 0 0 55
-8.49888992 -12.59029293 3.82765818 0 0 56
-8.50583458 -12.59269524 3.82783175 0 0 58
-8.51511574 -12.59428787 3.82631445 0 0 59
-8.53125763 -12.59741974 3.82291126 0 0 59
-8.54413223 -12.60003090 3.81936646 0 0 59
-8.54918671 -12.60235786 3.82110357 0 0 60
-8.55838585 -12.60309315 3.81752253 0 0 60
-8.57327843 -12.60439873 3.81444263 0 0 60
-8.57304001 -12.60750580 3.81558228 0 0 63
-8.59290886 -12.61028099 3.81217718 0 0 64
-8.60407639 -12.61194706 3.80909824 0 0 64
-8.62197495 -12.61378860 3.80519295 0 0 65
-8.61469078 -12.61622429 3.80931425 0 0 64
-8.61849022 -12.61946678 3.80829525 0 0 62
-8.63319778 -12.62164307 3.80631638 0 0 61
-8.62865448 -12.62462807 3.80864525 0 0 60
-8.65000534 -12.62612343 3.80377913 0 0 58
-8.66027260 -12.62955093 3.80096865 0 0 57
-8.67019081 -12.62938881 3.79821348 0 0 58
-8.67556572 -12.63220978 3.79779339 0 0 57
-8.68700027 -12.63386440 3.79567814 0 0 57
-8.67763901 -12.63984108 3.79937601 0 0 56
-8.70075035 -12.64004517 3.79400682 0 0 57
-8.68790245 -12.64326859 3.79656696 0 0 56
-8.70606613 -12.64509964 3.79362345 0 0 56
-8.70556259 -12.64821815 3.79379845 0 0 56
-8.70205307 -12.65080070 3.79480124 0 0 56
-8.72236824 -12.65269279 3.79126167 0 0 56
-8.71077347 -12.65774345 3.79349327 0 0 56
-8.74236870 -12.65683365 3.78679562 0 0 57
-8.72197151 -12.66250610 3.79251623 0 0 56
-8.73705101 -12.66294193 3.78833866 0 0 56
-8.76361656 -12.66279602 3.78200674 0 0 57
-8.71744728 -12.67131996 3.79386473 0 0 56
-8.75393105 -12.67101574 3.78478241 0 0 56
-8.75603485 -12.67331505 3.78422260 0 0 57
-8.75422478 -12.67683983 3.78476334 0 0 57
-8.75398445 -12.67994499 3.78590202 0 0 57
-8.76214981 -12.68107605 3.78364897 0 0 57
-8.75387955 -12.68441582 3.78597879 0 0 57
-8.76068687 -12.68819237 3.78413105 0 0 58
-8.74262428 -12.69305611 3.78815508 0 0 58
-8.77179718 -12.69209290 3.78109312 0 0 57
-8.74121284 -12.69793510 3.78859901 0 0 58
-8.74070740 -12.70105171 3.78877306 0 0 57
-8.77028084 -12.70144367 3.78161526 0 0 57
-8.73147583 -12.70839119 3.79141521 0 0 58
-8.75908279 -12.70784569 3.78375101 0 0 58
-8.75440025 -12.71220398 3.78406239 0 0 58
-8.74019623 -12.71807098 3.78702497 0 0 58
-8.74274445 -12.71948814 3.78633213 0 0 58
-8.72944832 -12.72359467 3.78902769 0 0 58
-8.72247887 -12.72652340 3.79099321 0 0 58
-8.70760727 -12.73104858 3.79308844 0 0 58
-8.67688370 -12.73826885 3.79857731 0 0 59
-8.65856171 -12.74314022 3.80163240 0 0 59
-8.63677406 -12.74835968 3.80565691 0 0 59
-8.62060356 -12.75329590 3.80812120 0 0 59
-8.61493683 -12.75581646 3.80971909 0 0 58
-8.64418983 -12.75845337 3.80163622 0 0 58
-6.58391047 -12.45018578 4.13307571 0 0 62
-6.66157579 -12.45091248 4.12192154 0 0 63
-6.72112703 -12.45030975 4.11058950 0 0 63
-6.80512476 -12.44985771 4.09870195 0 0 61
-6.85730791 -12.45083046 4.08943129 0 0 60
-7.43135500 -12.47031879 3.99685431 0 0 60
-7.45885706 -12.47150803 3.99235344 0 0 60
-7.48186445 -12.47344398 3.99014473 0 0 60
-7.51202154 -12.47431564 3.98179102 0 0 63
-7.53992319 -12.47686005 3.97719383 0 0 61
-7.55803728 -12.47819138 3.97737455 0 0 59
-7.59016371 -12.47999668 3.96952009 0 0 59
-7.61766291 -12.48118401 3.96501970 0 0 60
-7.63798571 -12.48307991 3.96147871 0 0 60
-7.65968943 -12.48542500 3.95963717 0 0 58
-7.68346453 -12.48697281 3.95513439 0 0 57
-7.70751333 -12.48850822 3.95159578 0 0 57
-7.72594500 -12.49032784 3.94961739 0 0 57
-7.75187445 -12.49194145 3.94451809 0 0 58
-7.77245951 -12.49382210 3.94194412 0 0 59
-7.79520273 -12.49576950 3.93876886 0 0 57
-7.81206274 -12.49800968 3.93619490 0 0 55
-7.83283567 -12.49902344 3.93252039 0 0 54
-7.85557604 -12.50097084 3.92934704 0 0 55
-7.88312864 -12.50266075 3.92172289 0 0 56
-7.89190722 -12.50463200 3.92346191 0 0 56
-7.91945887 -12.50632286 3.91583872 0 0 58
-7.94089556 -12.50867844 3.91303492 0 0 59
-7.95735979 -12.50956917 3.91055250 0 0 60
-7.97422171 -12.51181030 3.90797710 0 0 61
-7.98978186 -12.51446152 3.90576315 0 0 60
-8.00951576 -12.51587296 3.90342236 0 0 60
-8.02853394 -12.51817894 3.90024614 0 0 59
-8.04323769 -12.52035427 3.89826632 0 0 57
-8.06356239 -12.52225113 3.89472723 0 0 57
-8.07826996 -12.52442741 3.89274931 0 0 58
-8.09428215 -12.52619743 3.89040232 0 0 58
-8.11927795 -12.52647305 3.88347197 0 0 59
-8.12630272 -12.52973461 3.88570976 0 0 58
-8.15430641 -12.53054619 3.87795210 0 0 57
-8.16771126 -12.53313446 3.87633944 0 0 59
-8.18457413 -12.53537941 3.87376261 0 0 59
-8.19627571 -12.53702164 3.87261105 0 0 58
-8.21789932 -12.53850651 3.86870432 0 0 58
-8.23234177 -12.54069519 3.86576128 0 0 58
-8.24359322 -12.54322243 3.86474180 0 0 58
-8.25314140 -12.54480362 3.86418724 0 0 57
-8.27085495 -12.54751778 3.86137819 0 0 57
-8.28340721 -12.54963303 3.85999775 0 0 57
-8.29484367 -12.55128670 3.85787916 0 0 57
-8.31229019 -12.55401421 3.85410929 0 0 57
-8.31726456 -12.55547905 3.85378408 0 0 57
-8.33524513 -12.55818272 3.85193872 0 0 60
-8.34452629 -12.55977440 3.85042143 0 0 59
-8.36606979 -12.56040001 3.84445238 0 0 59
-8.37835503 -12.56252670 3.84210682 0 0 59
-8.38790321 -12.56410789 3.84155035 0 0 60
-8.41293144 -12.56748199 3.83671904 0 0 59
-8.42502975 -12.57048035 3.83547306 0 0 56
-8.43476677 -12.57119179 3.83381987 0 0 57
-8.44601440 -12.57371712 3.83280182 0 0 55
-8.45269203 -12.57612801 3.83201599 0 0 54
-8.46067238 -12.57813072 3.83086061 0 0 55
-8.48053932 -12.58090591 3.82745695 0 0 55
-8.48550987 -12.58237457 3.82713032 0 0 55
-8.49349022 -12.58437729 3.82597589 0 0 55
-8.50101662 -12.58725929 3.82495928 0 0 55
-8.51375771 -12.58850288 3.82247686 0 0 55
-8.52024651 -12.59178925 3.82278776 0 0 57
-8.52822495 -12.59379005 3.82163668 0 0 59
-8.54567146 -12.59651566 3.81786537 0 0 59
-8.56069756 -12.59918594 3.81372499 0 0 58
-8.56490135 -12.60104370 3.81569338 0 0 58
-8.57495308 -12.60224724 3.81188154 0 0 58
-8.58984566 -12.60355568 3.80880404 0 0 58
-8.58875465 -12.60618973 3.81017160 0 0 60
-8.60647011 -12.60890198 3.80736494 0 0 62
-8.61718559 -12.61144924 3.80441856 0 0 64
-8.63396454 -12.61283112 3.79978037 0 0 64
-8.62955284 -12.61443806 3.80413198 0 0 65
-8.63551140 -12.61774254 3.80251741 0 0 62
-8.65021896 -12.61991978 3.80053854 0 0 61
-8.64567184 -12.62290192 3.80287027 0 0 60
-8.66787910 -12.62486839 3.79776812 0 0 59
-8.67814064 -12.62829590 3.79495907 0 0 59
-8.68590736 -12.62807465 3.79280329 0 0 59
-8.69258308 -12.63048553 3.79201651 0 0 58
-8.70487022 -12.63261223 3.78967142 0 0 58
-8.69681358 -12.63817692 3.79300165 0 0 57
-8.71992111 -12.63838005 3.78763247 0 0 57
-8.70837975 -12.64119530 3.78982782 0 0 56
-8.72524261 -12.64343739 3.78724957 0 0 56
-8.72603798 -12.64614296 3.78705931 0 0 56
-8.72279739 -12.64871693 3.78902483 0 0 56
-8.74499893 -12.65068340 3.78392649 0 0 57
-8.73281860 -12.65525055 3.78735256 0 0 57
-8.76499748 -12.65482235 3.77946281 0 0 58
-8.74590111 -12.66008377 3.78481245 0 0 57
-8.76124954 -12.66051102 3.78159952 0 0 57
-8.78997231 -12.66042995 3.77467299 0 0 59
-8.74164963 -12.66888905 3.78712797 0 0 56
-8.78074074 -12.66776657 3.77730894 0 0 57
-8.78396034 -12.67052650 3.77748537 0 0 58
-8.78318596 -12.67365265 3.77669954 0 0 57
-8.78034019 -12.67757797 3.77856588 0 0 57
-8.78850365 -12.67871094 3.77631426 0 0 57
-8.78023338 -12.68204975 3.77864313 0 0 57
-8.78573608 -12.68623352 3.77716208 0 0 57
-8.76898193 -12.69068813 3.78082037 0 0 58
-8.79945755 -12.68931389 3.77339029 0 0 57
-8.76914024 -12.69514656 3.78186274 0 0 58
-8.77078629 -12.69832611 3.78144217 0 0 58
-8.80139542 -12.69831944 3.77295208 0 0 58
-8.75998688 -12.70608330 3.78348160 0 0 58
-8.78804207 -12.70466042 3.77568626 0 0 57
-8.78493118 -12.70859528 3.77658987 0 0 57
-8.77288246 -12.71452618 3.77895975 0 0 57
-8.77628326 -12.71641541 3.77803469 0 0 57
-8.76689148 -12.71929169 3.77963209 0 0 58
-8.76077843 -12.72269249 3.78136539 0 0 57
-8.74747849 -12.72679996 3.78406334 0 0 58
-8.72348404 -12.73419380 3.78872347 0 0 58
-8.70821762 -12.73736763 3.79091454 0 0 59
-8.68773460 -12.74217701 3.79457140 0 0 59
-8.66738319 -12.74835396 3.79716825 0 0 59
-8.65323257 -12.75198555 3.80009413 0 0 59
-8.63530731 -12.75821495 3.80305815 0 0 58
-8.66205978 -12.75720024 3.79562759 0 0 59
-6.62922430 -12.45235729 4.12260771 0 0 63
-6.69204950 -12.45227814 4.11140966 0 0 63
-6.78237772 -12.45064926 4.09879637 0 0 62
-6.83868551 -12.45261955 4.08942509 0 0 61
-6.86839342 -12.45163536 4.08429050 0 0 60
-7.43270731 -12.47041321 3.99336672 0 0 61
-7.46106005 -12.47207355 3.98863602 0 0 62
-7.48537207 -12.47360229 3.98606157 0 0 62
-7.51422453 -12.47488403 3.97807074 0 0 65
-7.54388094 -12.47613525 3.97297335 0 0 62
-7.56226397 -12.47745323 3.97411776 0 0 59
-7.59497213 -12.47974300 3.96507168 0 0 60
-7.62117052 -12.48134041 3.96093512 0 0 59
-7.64306116 -12.48281479 3.95799303 0 0 58
-7.66580057 -12.48476028 3.95482063 0 0 57
-7.68984842 -12.48629761 3.95128345 0 0 58
-7.71277285 -12.48737335 3.94701242 0 0 58
-7.73205519 -12.48966408 3.94480419 0 0 57
-7.75825548 -12.49126434 3.94066620 0 0 58
-7.77727079 -12.49356937 3.93749571 0 0 58
-7.80243158 -12.49556923 3.93469000 0 0 57
-7.82033014 -12.49741077 3.93078184 0 0 55
-7.84136820 -12.49841213 3.92807150 0 0 55
-7.86150408 -12.50117683 3.92562819 0 0 56
-7.89081144 -12.50157833 3.91750813 0 0 57
-7.89999151 -12.50490379 3.91914940 0 0 56
-7.92929792 -12.50530243 3.91102457 0 0 58
-7.94857740 -12.50759697 3.90881538 0 0 59
-7.96459246 -12.50936699 3.90646791 0 0 60
-7.98145533 -12.51160717 3.90389109 0 0 60
-7.99746561 -12.51337814 3.90154648 0 0 59
-8.01908684 -12.51486206 3.89764166 0 0 59
-8.03706741 -12.51756477 3.89579678 0 0 58
-8.05438042 -12.51892567 3.89308548 0 0 57
-8.07339668 -12.52122784 3.88991213 0 0 58
-8.08810806 -12.52340698 3.88793230 0 0 58
-8.10523605 -12.52563667 3.88631916 0 0 59
-8.12911606 -12.52545357 3.87865782 0 0 59
-8.13698959 -12.52918625 3.88066339 0 0 58
-8.16499329 -12.52999878 3.87290621 0 0 58
-8.17754936 -12.53211784 3.87152243 0 0 59
-8.19441032 -12.53435802 3.86894751 0 0 60
-8.20741653 -12.53559113 3.86742973 0 0 59
-8.22859001 -12.53795815 3.86365652 0 0 59
-8.24329758 -12.54013443 3.86167860 0 0 59
-8.25428009 -12.54267311 3.85969782 0 0 58
-8.26383018 -12.54425430 3.85914326 0 0 57
-8.28284645 -12.54655838 3.85596609 0 0 57
-8.29454994 -12.54820347 3.85481548 0 0 57
-8.30683517 -12.55032921 3.85246801 0 0 56
-8.32585144 -12.55263329 3.84929419 0 0 56
-8.33082390 -12.55410194 3.84896994 0 0 57
-8.34638405 -12.55675030 3.84675837 0 0 60
-8.35606575 -12.55969810 3.84514380 0 0 59
-8.37891006 -12.55991364 3.83881044 0 0 59
-8.39061546 -12.56155777 3.83765841 0 0 60
-8.39904404 -12.56267834 3.83636904 0 0 59
-8.42492104 -12.56652355 3.83131075 0 0 59
-8.43832779 -12.56910992 3.82969522 0 0 58
-8.44806099 -12.56982231 3.82804155 0 0 58
-8.46016121 -12.57282066 3.82679224 0 0 55
-8.46840858 -12.57481384 3.82660484 0 0 55
-8.47566795 -12.57770920 3.82461977 0 0 55
-8.49553490 -12.58048344 3.82121563 0 0 55
-8.49880600 -12.58100510 3.82135439 0 0 55
-8.50809097 -12.58259964 3.81983280 0 0 55
-8.51542854 -12.58635235 3.81991529 0 0 55
-8.52947235 -12.58718967 3.81706667 0 0 55
-8.53484535 -12.59001160 3.81664276 0 0 56
-8.54282379 -12.59201431 3.81548977 0 0 57
-8.56138611 -12.59519958 3.81245470 0 0 58
-8.57771683 -12.59746170 3.80794811 0 0 57
-8.58147049 -12.60019779 3.81005239 0 0 57
-8.59066772 -12.60093212 3.80646992 0 0 57
-8.60686493 -12.60182762 3.80302763 0 0 57
-8.60577393 -12.60446167 3.80439425 0 0 58
-8.62106705 -12.60712528 3.80122185 0 0 59
-8.63074684 -12.61007023 3.79960442 0 0 62
-8.64667702 -12.61098099 3.79519558 0 0 61
-8.64154625 -12.61347866 3.79872465 0 0 64
-8.65122414 -12.61642456 3.79710722 0 0 62
-8.66593552 -12.61860466 3.79512596 0 0 61
-8.66223717 -12.62205696 3.79722691 0 0 60
-8.68359566 -12.62355042 3.79235840 0 0 59
-8.69404221 -12.62610817 3.78845024 0 0 59
-8.70508194 -12.62640953 3.78643227 0 0 59
-8.71175385 -12.62882042 3.78564215 0 0 59
-8.72319221 -12.63047791 3.78352785 0 0 59
-8.71728706 -12.63610268 3.78626490 0 0 57
-8.74039841 -12.63630676 3.78089428 0 0 58
-8.72867203 -12.63999462 3.78418350 0 0 57
-8.74598312 -12.64135361 3.78147459 0 0 57
-8.74651337 -12.64406967 3.78032064 0 0 56
-8.74412346 -12.64711380 3.78205490 0 0 56
-8.76704407 -12.64819145 3.77778292 0 0 59
-8.75702095 -12.65282059 3.78061533 0 0 58
-8.78619576 -12.65185738 3.77354956 0 0 60
-8.77010536 -12.65765381 3.77807283 0 0 58
-8.78387833 -12.65850067 3.77426529 0 0 60
-8.81044960 -12.65835857 3.76793242 0 0 63
-8.76584816 -12.66646099 3.78038931 0 0 57
-8.80709648 -12.66539955 3.76997471 0 0 59
-8.80789375 -12.66810608 3.76978397 0 0 60
-8.80738831 -12.67122078 3.76995707 0 0 59
-8.80669594 -12.67521095 3.77123117 0 0 59
-8.81400871 -12.67587090 3.76921177 0 0 59
-8.80704308 -12.67880058 3.77117491 0 0 57
-8.81208992 -12.68386555 3.76982832 0 0 57
-8.79448318 -12.68784904 3.77371740 0 0 57
-8.82450867 -12.68735886 3.76642179 0 0 57
-8.79679680 -12.69236946 3.77416229 0 0 58
-8.79974747 -12.69513893 3.77337503 0 0 58
-8.82931900 -12.69552803 3.76621294 0 0 59
-8.79051971 -12.70247650 3.77601290 0 0 57
-8.82373428 -12.70164967 3.76679134 0 0 56
-8.81931877 -12.70599461 3.76806307 0 0 56
-8.80772209 -12.71104431 3.77029562 0 0 57
-8.81184387 -12.71203995 3.77020121 0 0 57
-8.80303574 -12.71540070 3.77060604 0 0 57
-8.79907417 -12.71886444 3.77173853 0 0 57
-8.78577423 -12.72297096 3.77443695 0 0 58
-8.76569176 -12.72913456 3.77799797 0 0 58
-8.75369453 -12.73282909 3.78032827 0 0 58
-8.73693657 -12.73728466 3.78398466 0 0 58
-8.71789169 -12.74304962 3.78621817 0 0 58
-8.70086670 -12.74751568 3.78891182 0 0 58
-8.66453552 -12.75501823 3.79595327 0 0 59
-8.70453453 -12.75213242 3.78586817 0 0 59
-8.68445206 -12.75829506 3.78942966 0 0 60
-8.68655205 -12.76059341 3.78887081 0 0 59
-6.65866709 -12.45412064 4.11342573 0 0 62
-6.75787497 -12.45273209 4.09938717 0 0 63
-6.81594133 -12.45341301 4.08951759 0 0 63
-6.84734869 -12.45337105 4.08391953 0 0 62
-7.46371412 -12.47175598 3.98478174 0 0 63
-7.48802614 -12.47328472 3.98220825 0 0 63
-7.51687956 -12.47456741 3.97422028 0 0 67
-7.54653597 -12.47582054 3.96912098 0 0 63
-7.56577063 -12.47760963 3.97003269 0 0 60
-7.59893274 -12.47901917 3.96085215 0 0 60
-7.62512922 -12.48061752 3.95671558 0 0 59
-7.64872408 -12.48303413 3.95331335 0 0 57
-7.67218161 -12.48408890 3.95096922 0 0 57
-7.69465685 -12.48604488 3.94683266 0 0 58
-7.71739817 -12.48799038 3.94365978 0 0 58
-7.73713255 -12.48940277 3.94131708 0 0 57
-7.76436758 -12.49060440 3.93585205 0 0 58
-7.78450251 -12.49336910 3.93341064 0 0 57
-7.80984831 -12.49449348 3.92950439 0 0 56
-7.82801390 -12.49632740 3.92656422 0 0 56
-7.84860086 -12.49820900 3.92398787 0 0 56
-7.86761808 -12.50051117 3.92081308 0 0 56
-7.89862490 -12.50186062 3.91222811 0 0 58
-7.90897608 -12.50341034 3.91456509 0 0 56
-7.93652582 -12.50510216 3.90694189 0 0 59
-7.95711184 -12.50698757 3.90436554 0 0 59
-7.97312498 -12.50875473 3.90201998 0 0 59
-7.98913622 -12.51052475 3.89967251 0 0 59
-8.00730133 -12.51235485 3.89673042 0 0 58
-8.02847290 -12.51472282 3.89296293 0 0 58
-8.04775810 -12.51701736 3.89075041 0 0 57
-8.06507111 -12.51837635 3.88804102 0 0 57
-8.08408546 -12.52067947 3.88486576 0 0 58
-8.09879303 -12.52285767 3.88288641 0 0 59
-8.11507225 -12.52461624 3.88150454 0 0 60
-8.13850212 -12.52531433 3.87397766 0 0 59
-8.14813232 -12.52775574 3.87548304 0 0 58
-8.17568207 -12.52944946 3.86785984 0 0 59
-8.18738556 -12.53109550 3.86670637 0 0 59
-8.20510101 -12.53380871 3.86390257 0 0 59
-8.21810722 -12.53504372 3.86238146 0 0 59
-8.23797417 -12.53781700 3.85897779 0 0 60
-8.25313568 -12.53911686 3.85686302 0 0 60
-8.26542091 -12.54124260 3.85451555 0 0 58
-8.27536774 -12.54417706 3.85386515 0 0 57
-8.29398537 -12.54512691 3.85078573 0 0 57
-8.30608749 -12.54812622 3.84953737 0 0 57
-8.31882668 -12.54937172 3.84705734 0 0 56
-8.33869553 -12.55214882 3.84365463 0 0 57
-8.34366989 -12.55361557 3.84332657 0 0 57
-8.35707283 -12.55620289 3.84171438 0 0 59
-8.36747551 -12.55825806 3.84092569 0 0 58
-8.39247131 -12.55853367 3.83399725 0 0 58
-8.40175438 -12.56012726 3.83247662 0 0 59
-8.41058159 -12.56260109 3.83109236 0 0 59
-8.43717957 -12.56555557 3.82686281 0 0 59
-8.44973373 -12.56767082 3.82547903 0 0 60
-8.45901299 -12.56926346 3.82395744 0 0 60
-8.47327042 -12.57232285 3.82211447 0 0 57
-8.48470879 -12.57397652 3.81999969 0 0 56
-8.49183846 -12.57551003 3.81907606 0 0 56
-8.50909805 -12.57910347 3.81640530 0 0 55
-8.51321983 -12.58009720 3.81630898 0 0 55
-8.52250099 -12.58169174 3.81478882 0 0 55
-8.52957535 -12.58545876 3.81390572 0 0 55
-8.54388237 -12.58628464 3.81202316 0 0 55
-8.55010986 -12.58957863 3.81137037 0 0 56
-8.55854034 -12.59069729 3.81007814 0 0 56
-8.57553291 -12.59430313 3.80644560 0 0 57
-8.59258080 -12.59567451 3.80277014 0 0 57
-8.59763908 -12.59800148 3.80450439 0 0 57
-8.60638428 -12.59961605 3.80105925 0 0 56
-8.62258148 -12.60051346 3.79761553 0 0 56
-8.62279320 -12.60273933 3.79861832 0 0 57
-8.63893890 -12.60587120 3.79521322 0 0 57
-8.64619255 -12.60876465 3.79323053 0 0 59
-8.66324615 -12.61013603 3.78955412 0 0 58
-8.65641022 -12.61169052 3.79354239 0 0 60
-8.66609192 -12.61463642 3.79192877 0 0 61
-8.68053627 -12.61682510 3.78898478 0 0 60
-8.67813873 -12.61987114 3.79071760 0 0 60
-8.70061302 -12.62182617 3.78658342 0 0 59
-8.71348572 -12.62443542 3.78304100 0 0 60
-8.72367096 -12.62426567 3.78124952 0 0 60
-8.72877502 -12.62709808 3.77986622 0 0 60
-8.74106216 -12.62922287 3.77752113 0 0 60
-8.73757935 -12.63490200 3.78062439 0 0 59
-8.75957298 -12.63464451 3.77452374 0 0 60
-8.74829483 -12.63745117 3.77767801 0 0 58
-8.76646042 -12.63928223 3.77473593 0 0 58
-8.76896095 -12.64293098 3.77408314 0 0 58
-8.76616859 -12.64462280 3.77591228 0 0 57
-8.78361511 -12.64734459 3.77214003 0 0 61
-8.77749443 -12.65074730 3.77387476 0 0 61
-8.80491638 -12.65107918 3.76731396 0 0 63
-8.78954506 -12.65597916 3.77266645 0 0 61
-8.80220032 -12.65636444 3.76812315 0 0 63
-8.82486153 -12.65745163 3.76288509 0 0 67
-8.79220200 -12.66409206 3.77305412 0 0 58
-8.82914352 -12.66290665 3.76383448 0 0 64
-8.82863617 -12.66602325 3.76400948 0 0 63
-8.82682800 -12.66954994 3.76455021 0 0 62
-8.82632446 -12.67266464 3.76472187 0 0 60
-8.83448601 -12.67379570 3.76247072 0 0 60
-8.83209038 -12.67684078 3.76420546 0 0 59
-8.84046936 -12.68019485 3.76295567 0 0 57
-8.81999016 -12.68500900 3.76661348 0 0 57
-8.85216904 -12.68457985 3.75872183 0 0 57
-8.82400131 -12.69047356 3.76659632 0 0 58
-8.82740784 -12.69236088 3.76567316 0 0 59
-8.85352135 -12.69309998 3.75947618 0 0 60
-8.82320404 -12.69893265 3.76794863 0 0 57
-8.85511780 -12.69851303 3.75909138 0 0 58
-8.85330391 -12.70203781 3.75963354 0 0 57
-8.84170914 -12.70709038 3.76186752 0 0 57
-8.84511375 -12.70897579 3.76094007 0 0 57
-8.83657646 -12.71232891 3.76230812 0 0 58
-8.83391190 -12.71538162 3.76307917 0 0 58
-8.82407188 -12.71914101 3.76481390 0 0 58
-8.80640984 -12.72535896 3.76873875 0 0 58
-8.79571724 -12.72864437 3.77070189 0 0 58
-8.78241920 -12.73275089 3.77339792 0 0 58
-8.77185631 -12.73740196 3.77430296 0 0 58
-8.75855637 -12.74150944 3.77699804 0 0 57
-8.71216774 -12.75054550 3.78477192 0 0 58
-8.76437759 -12.74618721 3.77335978 0 0 58
-8.72647285 -12.75410652 3.77980423 0 0 58
-8.71205521 -12.75775528 3.78176832 0 0 59
-8.70548630 -12.76203537 3.78363466 0 0 58
-8.71907616 -12.76375484 3.78092289 0 0 56
-6.72925138 -12.45382023 4.10007048 0 0 64
-6.78973436 -12.45455170 4.09057093 0 0 64
-6.82329988 -12.45457458 4.08437395 0 0 63
-7.46551943 -12.47097206 3.98115969 0 0 64
-7.49068213 -12.47296715 3.97835398 0 0 65
-7.51868391 -12.47378159 3.97059536 0 0 67
-7.55004358 -12.47597504 3.96503592 0 0 65
-7.56927443 -12.47776604 3.96594858 0 0 61
-7.60158777 -12.47870064 3.95699739 0 0 61
-7.62863588 -12.48077106 3.95263147 0 0 59
-7.65267992 -12.48230934 3.94909334 0 0 57
-7.67568827 -12.48424339 3.94688559 0 0 57
-7.69946814 -12.48579121 3.94238329 0 0 57
-7.72220564 -12.48773766 3.93921137 0 0 58
-7.74194479 -12.48914909 3.93686628 0 0 57
-7.77029371 -12.49081135 3.93213224 0 0 58
-7.79106569 -12.49182129 3.92845964 0 0 57
-7.81708097 -12.49429226 3.92542315 0 0 56
-7.83524561 -12.49612427 3.92247820 0 0 57
-7.85471582 -12.49754810 3.91917086 0 0 57
-7.87615061 -12.49990082 3.91636705 0 0 57
-7.90500498 -12.50118637 3.90837860 0 0 59
-7.91751146 -12.50279903 3.91011381 0 0 57
-7.94421053 -12.50401878 3.90272331 0 0 59
-7.96407747 -12.50679398 3.89931726 0 0 59
-7.98035574 -12.50855350 3.89793634 0 0 59
-7.99767160 -12.50991440 3.89522409 0 0 58
-8.01583481 -12.51174545 3.89228392 0 0 57
-8.03700638 -12.51411247 3.88851166 0 0 57
-8.05844307 -12.51646614 3.88570642 0 0 57
-8.07360458 -12.51776505 3.88359022 0 0 58
-8.09392548 -12.51965714 3.88005209 0 0 59
-8.10733032 -12.52224922 3.87843561 0 0 60
-8.12419128 -12.52449036 3.87586117 0 0 60
-8.14834023 -12.52429390 3.86916256 0 0 59
-8.15882111 -12.52720833 3.87043762 0 0 59
-8.18552017 -12.52842903 3.86304712 0 0 60
-8.19677162 -12.53095341 3.86202669 0 0 59
-8.21578789 -12.53325844 3.85885525 0 0 59
-8.22879410 -12.53449440 3.85733700 0 0 59
-8.24695969 -12.53632545 3.85439539 0 0 60
-8.26252174 -12.53897667 3.85218477 0 0 60
-8.27682686 -12.53980255 3.85029745 0 0 58
-8.28650665 -12.54274654 3.84868336 0 0 57
-8.30382538 -12.54410744 3.84597158 0 0 56
-8.31722832 -12.54669476 3.84435892 0 0 56
-8.33082008 -12.54841423 3.84164715 0 0 56
-8.35010147 -12.55070782 3.83943605 0 0 57
-8.35480690 -12.55218315 3.83814669 0 0 58
-8.37036705 -12.55483437 3.83593369 0 0 58
-8.38162041 -12.55736256 3.83491993 0 0 57
-8.40316200 -12.55798817 3.82895041 0 0 58
-8.41459656 -12.55964184 3.82683420 0 0 58
-8.42414474 -12.56122398 3.82628012 0 0 58
-8.45074272 -12.56417656 3.82204723 0 0 59
-8.46127510 -12.56759357 3.82020283 0 0 60
-8.47100639 -12.56830406 3.81854820 0 0 60
-8.48656654 -12.57095623 3.81633711 0 0 58
-8.49827003 -12.57260132 3.81518412 0 0 58
-8.50624657 -12.57460403 3.81403017 0 0 58
-8.52396393 -12.57731438 3.81122303 0 0 56
-8.52651596 -12.57873154 3.81053162 0 0 56
-8.53534508 -12.58120728 3.80914879 0 0 55
-8.54443932 -12.58366966 3.80872440 0 0 55
-8.55718040 -12.58491707 3.80624342 0 0 55
-8.56497383 -12.58778954 3.80618906 0 0 56
-8.57425499 -12.58938313 3.80466938 0 0 56
-8.58909607 -12.59292221 3.80163002 0 0 57
-8.60699463 -12.59476566 3.79772472 0 0 56
-8.61178207 -12.59710503 3.79849815 0 0 56
-8.62098122 -12.59783745 3.79491568 0 0 56
-8.63744545 -12.59872627 3.79243326 0 0 56
-8.63909721 -12.60190392 3.79201174 0 0 57
-8.65595627 -12.60414505 3.78943682 0 0 56
-8.66321564 -12.60703850 3.78745413 0 0 56
-8.68241692 -12.60847187 3.78318024 0 0 56
-8.67428398 -12.61043644 3.78753614 0 0 57
-8.68181038 -12.61332035 3.78651667 0 0 59
-8.69840240 -12.61557388 3.78297663 0 0 59
-8.69470406 -12.61902618 3.78507900 0 0 59
-8.71763039 -12.62010193 3.78080511 0 0 59
-8.73135567 -12.62317848 3.77703428 0 0 61
-8.73912048 -12.62296009 3.77487803 0 0 61
-8.74449158 -12.62578392 3.77445555 0 0 61
-8.75677681 -12.62790680 3.77210855 0 0 60
-8.75459862 -12.63317680 3.77484846 0 0 60
-8.77659225 -12.63292027 3.76874447 0 0 62
-8.76746941 -12.63578415 3.77130461 0 0 60
-8.78433228 -12.63802719 3.76872778 0 0 60
-8.78643036 -12.64032555 3.76817083 0 0 60
-8.78403854 -12.64336777 3.76990652 0 0 59
-8.80324173 -12.64480209 3.76563358 0 0 62
-8.79451561 -12.64902306 3.76809978 0 0 63
-8.82108498 -12.64888000 3.76176786 0 0 64
-8.80871582 -12.65431786 3.76629496 0 0 62
-8.81792068 -12.65505028 3.76271009 0 0 64
-8.83712196 -12.65648079 3.75844049 0 0 64
-8.81725693 -12.66213322 3.76608562 0 0 62
-8.84570885 -12.66206264 3.75819349 0 0 69
-8.84911537 -12.66395092 3.75727034 0 0 67
-8.84730721 -12.66747761 3.75780821 0 0 63
-8.84419250 -12.67141151 3.75871515 0 0 60
-8.85177231 -12.67206097 3.75765800 0 0 60
-8.85126686 -12.67517853 3.75782967 0 0 60
-8.86395073 -12.67865753 3.75538969 0 0 59
-8.84764671 -12.68223190 3.75891304 0 0 57
-8.87636948 -12.68214989 3.75198507 0 0 58
-8.84996033 -12.68675232 3.75935745 0 0 58
-8.85160828 -12.68992996 3.75893402 0 0 60
-8.87484932 -12.69149876 3.75250769 0 0 60
-8.85216522 -12.69574356 3.75987911 0 0 58
-8.87559319 -12.69644070 3.75235128 0 0 58
-8.87751007 -12.69961071 3.75289536 0 0 58
-8.86806488 -12.70472336 3.75452995 0 0 58
-8.87173653 -12.70659828 3.75457144 0 0 58
-8.86423302 -12.70954895 3.75460863 0 0 58
-8.86314011 -12.71218491 3.75597668 0 0 58
-8.85675812 -12.71559525 3.75674486 0 0 59
-8.84412384 -12.72104645 3.76030779 0 0 58
-8.83558655 -12.72439480 3.76167488 0 0 58
-8.82574272 -12.72815418 3.76340866 0 0 58
-8.81890297 -12.73244667 3.76431561 0 0 58
-8.81251907 -12.73585892 3.76508379 0 0 58
-8.77246475 -12.74371719 3.77212715 0 0 58
-8.81834221 -12.74053764 3.76144266 0 0 59
-8.78846931 -12.74822617 3.76670218 0 0 58
-8.76844215 -12.75215530 3.77022028 0 0 58
-8.73947525 -12.75808239 3.77520609 0 0 58
-8.73048401 -12.76231384 3.77670717 0 0 57
-8.73676109 -12.76337051 3.77601480 0 0 57
-6.69586706 -12.45566368 4.10208750 0 0 63
-6.75693369 -12.45687866 4.09138870 0 0 65
-6.79422331 -12.45654488 4.08519554 0 0 64
-6.85327196 -12.45631790 4.07711840 0 0 61
-7.49203348 -12.47306252 3.97486830 0 0 66
-7.51977015 -12.47388363 3.96614504 0 0 66
-7.55224466 -12.47654057 3.96131802 0 0 65
-7.57193232 -12.47744942 3.96209431 0 0 62
-7.60424089 -12.47838593 3.95314360 0 0 61
-7.63259554 -12.48004913 3.94841480 0 0 59
-7.65618849 -12.48246670 3.94500971 0 0 58
-7.68049860 -12.48399162 3.94243431 0 0 57
-7.70369196 -12.48505592 3.93912745 0 0 57
-7.72746897 -12.48660278 3.93462372 0 0 57
-7.74805593 -12.48848534 3.93204737 0 0 57
-7.77640963 -12.49014759 3.92731857 0 0 58
-7.79699564 -12.49203396 3.92474127 0 0 58
-7.82319212 -12.49363041 3.92060566 0 0 57
-7.84135771 -12.49546432 3.91766405 0 0 57
-7.86064100 -12.49775410 3.91545248 0 0 58
-7.88383532 -12.49881935 3.91214705 0 0 58
-7.91268873 -12.50010490 3.90415668 0 0 60
-7.92447329 -12.50260735 3.90506792 0 0 58
-7.95117426 -12.50382805 3.89767694 0 0 60
-7.97175932 -12.50571251 3.89510107 0 0 59
-7.98862219 -12.50795364 3.89252472 0 0 58
-8.00593758 -12.50931549 3.88981104 0 0 57
-8.02436829 -12.51113510 3.88783312 0 0 57
-8.04554176 -12.51350021 3.88406372 0 0 56
-8.06743240 -12.51497459 3.88112068 0 0 58
-8.08213806 -12.51715279 3.87914085 0 0 58
-8.10245895 -12.51904774 3.87560177 0 0 60
-8.11501312 -12.52116203 3.87421751 0 0 60
-8.13317680 -12.52299690 3.87127733 0 0 59
-8.15687180 -12.52368259 3.86471224 0 0 59
-8.16865730 -12.52618599 3.86562443 0 0 60
-8.19405556 -12.52781773 3.85859537 0 0 61
-8.20660782 -12.52993584 3.85721350 0 0 60
-8.22719574 -12.53181839 3.85463762 0 0 59
-8.23948097 -12.53394508 3.85228968 0 0 59
-8.25634575 -12.53618813 3.84971333 0 0 60
-8.27235603 -12.53795624 3.84736919 0 0 60
-8.28751755 -12.53925323 3.84525442 0 0 58
-8.29765129 -12.54131699 3.84350300 0 0 57
-8.31666565 -12.54361916 3.84033060 0 0 57
-8.33033943 -12.54620075 3.83968019 0 0 57
-8.34222794 -12.54697227 3.83742666 0 0 57
-8.35993958 -12.54968643 3.83462000 0 0 57
-8.36576653 -12.55162811 3.83406210 0 0 57
-8.38392830 -12.55345726 3.83112192 0 0 58
-8.39518166 -12.55598450 3.83010244 0 0 57
-8.41645432 -12.55661869 3.82317305 0 0 57
-8.42815590 -12.55826187 3.82202005 0 0 57
-8.43744087 -12.55985546 3.82050037 0 0 58
-8.46403694 -12.56280804 3.81626987 0 0 59
-8.47483444 -12.56621456 3.81538677 0 0 59
-8.48542213 -12.56739807 3.81350183 0 0 60
-8.50012779 -12.56957817 3.81152391 0 0 60
-8.50895882 -12.57205200 3.81013823 0 0 61
-8.51824379 -12.57364464 3.80861998 0 0 61
-8.53680420 -12.57682991 3.80558062 0 0 57
-8.54092789 -12.57782459 3.80548906 0 0 56
-8.54805374 -12.57935429 3.80456495 0 0 55
-8.55885506 -12.58276176 3.80368090 0 0 55
-8.57159042 -12.58400917 3.80119848 0 0 55
-8.57911873 -12.58689308 3.80017900 0 0 56
-8.58781815 -12.58800316 3.79985762 0 0 56
-8.60396194 -12.59113693 3.79645014 0 0 56
-8.62159348 -12.59298897 3.79158115 0 0 56
-8.62664795 -12.59531593 3.79331827 0 0 56
-8.63539505 -12.59693146 3.78987169 0 0 55
-8.65159225 -12.59782982 3.78642750 0 0 55
-8.65395927 -12.60011292 3.78683233 0 0 57
-8.67082214 -12.60235786 3.78425646 0 0 56
-8.68023491 -12.60531425 3.78167915 0 0 56
-8.70028877 -12.60721779 3.77717495 0 0 56
-8.69345474 -12.60877514 3.78116179 0 0 56
-8.70097923 -12.61165810 3.78014374 0 0 57
-8.71411514 -12.61425400 3.77756739 0 0 59
-8.71172523 -12.61730003 3.77930164 0 0 59
-8.73334694 -12.61878586 3.77539444 0 0 59
-8.74621582 -12.62139511 3.77185297 0 0 62
-8.75353241 -12.62205315 3.76983309 0 0 62
-8.76150894 -12.62405396 3.76867867 0 0 61
-8.77425003 -12.62530231 3.76620007 0 0 60
-8.76946449 -12.63138771 3.76966524 0 0 61
-8.79361153 -12.63119125 3.76296854 0 0 63
-8.78403473 -12.63494110 3.76566458 0 0 62
-8.80049896 -12.63582897 3.76318312 0 0 62
-8.80214691 -12.63900757 3.76276064 0 0 61
-8.79975510 -12.64204979 3.76449442 0 0 60
-8.82268143 -12.64312649 3.76022625 0 0 63
-8.81238747 -12.64776802 3.76209259 0 0 64
-8.83679962 -12.64756393 3.75635576 0 0 64
-8.82573891 -12.65259171 3.76051569 0 0 64
-8.83493805 -12.65332508 3.75693464 0 0 63
-8.85674667 -12.65393639 3.75193119 0 0 60
-8.83342361 -12.65993500 3.76053810 0 0 68
-8.85927200 -12.66068459 3.75337839 0 0 70
-8.86613274 -12.66222572 3.75149345 0 0 70
-8.86935043 -12.66498375 3.75166988 0 0 65
-8.86493492 -12.66932869 3.75293922 0 0 59
-8.87094688 -12.67039871 3.75128412 0 0 58
-8.86828423 -12.67345238 3.75205517 0 0 59
-8.88012123 -12.67646027 3.74984264 0 0 59
-8.87269974 -12.68027115 3.75194359 0 0 58
-8.89469147 -12.68001366 3.74583960 0 0 58
-8.87370682 -12.68520355 3.75275373 0 0 58
-8.87320137 -12.68832207 3.75292730 0 0 59
-8.89904976 -12.68906784 3.74576664 0 0 58
-8.87349319 -12.69414330 3.75291061 0 0 59
-8.89979362 -12.69400978 3.74561357 0 0 58
-8.90013695 -12.69759750 3.74555874 0 0 58
-8.89226341 -12.70229149 3.74779081 0 0 57
-8.89611816 -12.70329857 3.74673510 0 0 57
-8.88843155 -12.70711899 3.74787092 0 0 57
-8.88864899 -12.70934582 3.74887276 0 0 58
-8.88311386 -12.71322823 3.74941158 0 0 58
-8.87393761 -12.71832943 3.75201273 0 0 58
-8.86800385 -12.72086143 3.75264597 0 0 59
-8.86143303 -12.72514343 3.75451469 0 0 59
-8.85504913 -12.72855568 3.75528574 0 0 59
-8.85023499 -12.73154640 3.75665331 0 0 60
-8.82382202 -12.73888874 3.76094484 0 0 59
-8.85775566 -12.73716927 3.75255251 0 0 60
-8.83942986 -12.74204445 3.75561190 0 0 59
-8.82828522 -12.74621010 3.75771189 0 0 59
-8.79931831 -12.75213623 3.76269484 0 0 58
-8.77465820 -12.75818634 3.76648664 0 0 58
-8.76657295 -12.76065445 3.76771736 0 0 58
-8.76561546 -12.76465607 3.76802778 0 0 58
-6.66979456 -12.45816803 4.10207701 0 0 62
-6.72269583 -12.45825100 4.09363604 0 0 65
-6.76083612 -12.45838737 4.08720922 0 0 65
-6.82334566 -12.45781803 4.07816887 0 0 62
-7.52027273 -12.47350502 3.96288776 0 0 64
-7.55405092 -12.47575569 3.95769596 0 0 65
-7.57458830 -12.47713470 3.95824480 0 0 62
-7.60775042 -12.47854233 3.94905901 0 0 62
-7.63636923 -12.48019218 3.94529104 0 0 60
-7.65911055 -12.48213673 3.94211912 0 0 58
-7.68445730 -12.48326588 3.93821573 0 0 58
-7.70719862 -12.48521233 3.93504143 0 0 57
-7.73254442 -12.48633862 3.93113852 0 0 57
-7.75313330 -12.48822403 3.92856121 0 0 57
-7.78148413 -12.48988342 3.92383242 0 0 58
-7.80310678 -12.49136734 3.91992569 0 0 58
-7.82827139 -12.49336624 3.91711998 0 0 57
-7.84728479 -12.49566841 3.91394711 0 0 58
-7.86675501 -12.49709320 3.91063881 0 0 58
-7.89080000 -12.49862766 3.90710068 0 0 60
-7.91834784 -12.50031948 3.89947844 0 0 61
-7.93170500 -12.50240707 3.90098619 0 0 60
-7.95755243 -12.50315475 3.89382601 0 0 61
-7.97899199 -12.50551033 3.89101934 0 0 60
-7.99630785 -12.50687027 3.88830709 0 0 58
-8.01447296 -12.50870132 3.88536358 0 0 57
-8.03263855 -12.51053429 3.88242292 0 0 57
-8.05537987 -12.51248169 3.87924623 0 0 56
-8.07681465 -12.51483536 3.87644053 0 0 58
-8.09152412 -12.51701355 3.87446260 0 0 59
-8.10969162 -12.51884842 3.87151909 0 0 60
-8.12354851 -12.52055454 3.86977053 0 0 60
-8.14256477 -12.52285862 3.86659765 0 0 59
-8.16514015 -12.52308178 3.85929966 0 0 59
-8.17719078 -12.52557564 3.86117411 0 0 61
-8.20258713 -12.52720833 3.85414743 0 0 61
-8.21644783 -12.52891350 3.85239792 0 0 61
-8.23703194 -12.53079605 3.84982157 0 0 60
-8.24847031 -12.53245258 3.84770679 0 0 60
-8.26618385 -12.53516579 3.84489870 0 0 59
-8.28434753 -12.53699780 3.84195709 0 0 59
-8.29735374 -12.53823090 3.84043837 0 0 58
-8.30860519 -12.54075623 3.83942080 0 0 57
-8.32892609 -12.54265213 3.83588123 0 0 57
-8.34148026 -12.54476929 3.83449793 0 0 57
-8.35376740 -12.54689789 3.83215189 0 0 57
-8.37147903 -12.54961014 3.82934284 0 0 57
-8.37775612 -12.55066776 3.82865334 0 0 57
-8.39677238 -12.55297184 3.82548046 0 0 58
-8.40717506 -12.55502510 3.82469177 0 0 58
-8.42786217 -12.55517960 3.81895494 0 0 57
-8.44014740 -12.55730343 3.81660843 0 0 57
-8.44969749 -12.55888748 3.81605387 0 0 58
-8.47602844 -12.56184864 3.81086111 0 0 60
-8.48727989 -12.56437588 3.80984163 0 0 60
-8.49786377 -12.56555939 3.80795765 0 0 61
-8.51127052 -12.56814671 3.80634165 0 0 61
-8.52036667 -12.57061005 3.80592203 0 0 62
-8.52919769 -12.57308388 3.80453825 0 0 62
-8.54879570 -12.57587051 3.80016899 0 0 59
-8.55337334 -12.57598495 3.79993725 0 0 57
-8.56219864 -12.57845879 3.79855585 0 0 55
-8.57345200 -12.58098698 3.79753828 0 0 55
-8.58515358 -12.58263206 3.79638529 0 0 55
-8.59268188 -12.58551407 3.79536629 0 0 56
-8.60111237 -12.58663368 3.79407787 0 0 56
-8.61895752 -12.59071255 3.79020882 0 0 55
-8.63600349 -12.59208298 3.78653765 0 0 55
-8.64191246 -12.59488487 3.78804159 0 0 55
-8.65025902 -12.59514427 3.78468990 0 0 55
-8.66515350 -12.59644985 3.78161287 0 0 55
-8.66595078 -12.59915733 3.78142166 0 0 56
-8.68523598 -12.60144997 3.77921343 0 0 56
-8.69595146 -12.60399818 3.77626753 0 0 56
-8.71645546 -12.60502052 3.77162743 0 0 57
-8.70917130 -12.60745907 3.77574968 0 0 57
-8.71669769 -12.61034393 3.77473354 0 0 57
-8.72898293 -12.61246872 3.77238750 0 0 58
-8.72743988 -12.61598396 3.77389145 0 0 59
-8.74951744 -12.61658478 3.76984835 0 0 59
-8.76166725 -12.62008858 3.76547909 0 0 61
-8.77054977 -12.62032890 3.76405478 0 0 61
-8.77807808 -12.62321281 3.76303816 0 0 62
-8.79211998 -12.62404823 3.76018953 0 0 60
-8.78648376 -12.62966347 3.76388836 0 0 62
-8.80847549 -12.62940598 3.75778627 0 0 64
-8.80020332 -12.63274479 3.76011801 0 0 63
-8.81836891 -12.63457584 3.75717592 0 0 62
-8.81916618 -12.63728333 3.75698423 0 0 61
-8.81677437 -12.64032745 3.75871897 0 0 61
-8.83812904 -12.64182281 3.75385046 0 0 64
-8.83070946 -12.64563274 3.75594950 0 0 65
-8.85225105 -12.64625835 3.74998140 0 0 62
-8.84145164 -12.65127659 3.75510693 0 0 63
-8.85195923 -12.65159798 3.75115728 0 0 60
-8.87964249 -12.65191650 3.74555635 0 0 58
-8.84411240 -12.65938759 3.75549221 0 0 69
-8.87256813 -12.65931702 3.74760199 0 0 65
-8.87839127 -12.66125488 3.74704409 0 0 69
-8.88506508 -12.66366863 3.74625874 0 0 66
-8.88756561 -12.66732025 3.74560213 0 0 58
-8.89272499 -12.66791630 3.74417925 0 0 56
-8.88817787 -12.67089748 3.74650955 0 0 57
-8.89955902 -12.67478752 3.74443245 0 0 58
-8.88971710 -12.67854691 3.74616480 0 0 58
-8.91543388 -12.67792988 3.74006557 0 0 57
-8.89548874 -12.68272018 3.74564743 0 0 58
-8.89524841 -12.68582630 3.74678612 0 0 58
-8.92540550 -12.68669891 3.73843193 0 0 58
-8.89639282 -12.69212341 3.74653864 0 0 58
-8.92772102 -12.69122410 3.73887777 0 0 57
-8.92564392 -12.69475937 3.73845387 0 0 57
-8.91992378 -12.69951630 3.74009085 0 0 57
-8.92359352 -12.70139122 3.74013090 0 0 56
-8.91766357 -12.70392227 3.74076653 0 0 56
-8.91715622 -12.70703697 3.74093914 0 0 57
-8.91234398 -12.71003246 3.74230671 0 0 57
-8.90289879 -12.71514320 3.74394369 0 0 58
-8.89723206 -12.71766376 3.74554491 0 0 58
-8.89169693 -12.72154617 3.74608278 0 0 59
-8.88643074 -12.72542000 3.74758291 0 0 59
-8.88135338 -12.72842407 3.74798965 0 0 59
-8.86126709 -12.73458672 3.75154924 0 0 60
-8.89304924 -12.73280716 3.74375296 0 0 59
-8.87772751 -12.73821259 3.74598551 0 0 59
-8.87160873 -12.74161339 3.74772072 0 0 59
-8.85458565 -12.74608040 3.75041628 0 0 59
-8.83122826 -12.75171947 3.75383902 0 0 59
-8.82053757 -12.75500679 3.75580502 0 0 58
-8.79242134 -12.76140404 3.76055431 0 0 58
-8.78369904 -12.76562309 3.76302195 0 0 56
-8.80231476 -12.76657486 3.75994492 0 0 56
-6.70295763 -12.45957756 4.09289694 0 0 64
-6.72875643 -12.45982265 4.08885717 0 0 65
-6.78865385 -12.46006966 4.08054972 0 0 64
-7.55540228 -12.47584820 3.95420933 0 0 64
-7.57639360 -12.47634506 3.95462084 0 0 62
-7.60910273 -12.47863579 3.94557476 0 0 62
-7.63902617 -12.47987843 3.94143915 0 0 61
-7.66306925 -12.48141289 3.93790007 0 0 59
-7.68823004 -12.48341084 3.93509436 0 0 59
-7.70985460 -12.48489571 3.93118906 0 0 57
-7.73735476 -12.48608303 3.92669058 0 0 57
-7.75924253 -12.48755932 3.92374706 0 0 57
-7.78629351 -12.48962784 3.91937971 0 0 58
-7.80733061 -12.49062920 3.91667175 0 0 58
-7.83307695 -12.49311066 3.91267061 0 0 57
-7.85339594 -12.49500847 3.90913057 0 0 58
-7.87313318 -12.49641895 3.90678644 0 0 59
-7.89717913 -12.49795341 3.90324640 0 0 60
-7.92473173 -12.49964714 3.89562464 0 0 62
-7.93808699 -12.50173378 3.89713240 0 0 61
-7.96321535 -12.50337410 3.88914347 0 0 61
-7.98595476 -12.50532055 3.88597202 0 0 60
-8.00268555 -12.50619507 3.88445139 0 0 58
-8.02170181 -12.50850105 3.88128042 0 0 58
-8.04117012 -12.50992203 3.87797022 0 0 57
-8.06391335 -12.51186657 3.87479639 0 0 56
-8.08423233 -12.51376343 3.87126064 0 0 58
-8.09920692 -12.51592922 3.87024355 0 0 59
-8.11710739 -12.51777458 3.86633539 0 0 59
-8.13338280 -12.51953125 3.86495399 0 0 59
-8.15154839 -12.52136421 3.86201239 0 0 58
-8.17367363 -12.52247047 3.85485125 0 0 58
-8.18657684 -12.52543831 3.85649490 0 0 60
-8.21112442 -12.52659512 3.84969854 0 0 60
-8.22498322 -12.52830029 3.84794950 0 0 61
-8.24529839 -12.53019524 3.84441042 0 0 60
-8.25830650 -12.53143215 3.84289169 0 0 60
-8.27687263 -12.53461647 3.83985233 0 0 59
-8.29418373 -12.53597641 3.83714104 0 0 59
-8.30804062 -12.53768349 3.83539295 0 0 58
-8.31929398 -12.54020882 3.83437443 0 0 58
-8.33876419 -12.54163170 3.83106756 0 0 58
-8.35216904 -12.54421997 3.82945251 0 0 58
-8.36490631 -12.54546738 3.82696867 0 0 58
-8.38347244 -12.54865265 3.82393122 0 0 57
-8.38974762 -12.54970932 3.82323885 0 0 57
-8.40687752 -12.55193996 3.82162666 0 0 58
-8.41916466 -12.55406761 3.81928062 0 0 58
-8.43855095 -12.55462933 3.81391096 0 0 57
-8.45083809 -12.55675507 3.81156158 0 0 56
-8.46038818 -12.55833626 3.81100607 0 0 57
-8.48698425 -12.56128883 3.80677843 0 0 60
-8.49953842 -12.56340790 3.80539274 0 0 61
-8.50855064 -12.56500816 3.80290937 0 0 62
-8.52326012 -12.56719112 3.80093050 0 0 62
-8.53235626 -12.56965256 3.80051088 0 0 63
-8.54033661 -12.57165432 3.79935598 0 0 63
-8.56150818 -12.57402229 3.79558611 0 0 59
-8.56647873 -12.57549095 3.79525995 0 0 58
-8.57576180 -12.57708168 3.79374027 0 0 56
-8.58701515 -12.57960796 3.79272318 0 0 55
-8.59714699 -12.58167267 3.79097509 0 0 55
-8.60579300 -12.58501816 3.79068899 0 0 56
-8.61422157 -12.58613968 3.78939962 0 0 56
-8.63467216 -12.58939552 3.78480196 0 0 55
-8.65041733 -12.59117508 3.78149176 0 0 55
-8.65650940 -12.59310722 3.78189945 0 0 55
-8.66525459 -12.59472084 3.77845287 0 0 54
-8.68001938 -12.59466457 3.77643108 0 0 54
-8.68081665 -12.59737015 3.77624273 0 0 55
-8.69964790 -12.60054493 3.77416754 0 0 55
-8.71166611 -12.60268211 3.77085686 0 0 56
-8.73086739 -12.60411549 3.76658297 0 0 57
-8.72403336 -12.60566902 3.77057171 0 0 57
-8.73156357 -12.60855293 3.76955271 0 0 57
-8.74469757 -12.61115265 3.76697397 0 0 57
-8.74446106 -12.61426163 3.76811504 0 0 58
-8.76608467 -12.61574364 3.76420927 0 0 59
-8.77738380 -12.61877537 3.76006889 0 0 60
-8.78626823 -12.61901093 3.75864410 0 0 61
-8.79294205 -12.62142372 3.75785875 0 0 62
-8.80698586 -12.62226009 3.75501108 0 0 61
-8.80305099 -12.62881851 3.75824690 0 0 61
-8.82288742 -12.62849808 3.75274229 0 0 62
-8.81676865 -12.63190079 3.75447607 0 0 64
-8.83539009 -12.63285065 3.75139904 0 0 63
-8.83703613 -12.63602924 3.75097513 0 0 61
-8.83379364 -12.63860130 3.75294209 0 0 60
-8.85384750 -12.64050674 3.74843836 0 0 64
-8.84557343 -12.64384365 3.75077057 0 0 64
-8.87083817 -12.64411163 3.74480104 0 0 59
-8.85847473 -12.64954948 3.74932766 0 0 60
-8.87270164 -12.64951515 3.74538088 0 0 58
-8.89796638 -12.64978313 3.73941755 0 0 57
-8.85767365 -12.65800476 3.75067997 0 0 63
-8.89330864 -12.65723228 3.74182558 0 0 59
-8.89280128 -12.66034985 3.74200010 0 0 62
-8.89835930 -12.66230011 3.74047947 0 0 63
-8.90876007 -12.66435528 3.73969316 0 0 57
-8.91647148 -12.66636753 3.73757648 0 0 56
-8.91322899 -12.66893768 3.73954248 0 0 56
-8.92376137 -12.67235756 3.73769426 0 0 57
-8.91046143 -12.67646599 3.74039125 0 0 57
-8.93806267 -12.67592144 3.73272991 0 0 57
-8.91753769 -12.68022728 3.73950577 0 0 57
-8.92075348 -12.68298531 3.73968363 0 0 57
-8.94875717 -12.68379784 3.73192501 0 0 57
-8.92189598 -12.68928146 3.73943090 0 0 58
-8.95034981 -12.68921280 3.73154068 0 0 57
-8.94984436 -12.69232750 3.73171520 0 0 57
-8.94569397 -12.69666386 3.73395061 0 0 57
-8.95040321 -12.69814301 3.73266172 0 0 56
-8.94747543 -12.70120716 3.73246956 0 0 56
-8.94638443 -12.70384026 3.73383808 0 0 57
-8.94260788 -12.70643234 3.73387623 0 0 57
-8.93297768 -12.71241951 3.73661089 0 0 57
-8.92704582 -12.71494865 3.73724604 0 0 57
-8.92092705 -12.71835041 3.73897886 0 0 58
-8.91754532 -12.72229385 3.73892069 0 0 58
-8.91403770 -12.72487736 3.73992395 0 0 58
-8.89525795 -12.73063374 3.74311781 0 0 59
-8.92918968 -12.72891331 3.73472548 0 0 58
-8.91543770 -12.73390198 3.73755598 0 0 58
-8.90775299 -12.73772240 3.73869181 0 0 59
-8.89660835 -12.74188995 3.74079084 0 0 59
-8.87958336 -12.74635506 3.74348402 0 0 59
-8.87104607 -12.74970436 3.74485064 0 0 59
-8.84162521 -12.75651264 3.74997139 0 0 59
-8.81553268 -12.76160812 3.75518656 0 0 58
-8.81215286 -12.76555252 3.75512838 0 0 58
-8.82515717 -12.76678944 3.75361061 0 0 57
-6.72051001 -12.46056843 4.08596277 0 0 63
-6.75715971 -12.46198750 4.08100462 0 0 64
-7.57859468 -12.47691154 3.95090151 0 0 62
-7.61090708 -12.47784710 3.94195127 0 0 62
-7.64037752 -12.47997093 3.93795013 0 0 61
-7.66657495 -12.48156738 3.93381596 0 0 60
-7.69219065 -12.48268509 3.93087626 0 0 60
-7.71381235 -12.48416901 3.92697239 0 0 58
-7.74113131 -12.48623085 3.92356730 0 0 57
-7.76405191 -12.48730564 3.91929770 0 0 57
-7.79025221 -12.48890400 3.91516161 0 0 58
-7.81084299 -12.49078941 3.91258574 0 0 57
-7.83919001 -12.49245071 3.90785503 0 0 57
-7.85977888 -12.49433327 3.90527725 0 0 58
-7.87924623 -12.49575424 3.90196943 0 0 60
-7.90198946 -12.49770355 3.89879847 0 0 61
-7.92999029 -12.49851036 3.89103794 0 0 63
-7.94334650 -12.50059700 3.89254618 0 0 63
-7.96959448 -12.50270081 3.88529253 0 0 61
-7.99233866 -12.50464630 3.88211966 0 0 60
-8.00965118 -12.50600433 3.87940502 0 0 58
-8.02911758 -12.50742817 3.87609911 0 0 58
-8.04970551 -12.50931168 3.87352085 0 0 57
-8.07114029 -12.51166630 3.87071800 0 0 56
-8.09146118 -12.51355934 3.86717463 0 0 57
-8.10662460 -12.51485634 3.86506224 0 0 58
-8.12563705 -12.51716232 3.86188745 0 0 58
-8.14322090 -12.51851177 3.86013842 0 0 59
-8.16008568 -12.52075195 3.85756159 0 0 58
-8.18220711 -12.52185631 3.85040140 0 0 58
-8.19511223 -12.52482605 3.85204363 0 0 59
-8.22010994 -12.52510357 3.84511328 0 0 60
-8.23481941 -12.52727890 3.84313583 0 0 61
-8.25495148 -12.53004837 3.84069204 0 0 60
-8.26769257 -12.53129387 3.83821154 0 0 59
-8.28670502 -12.53359413 3.83503914 0 0 59
-8.30356789 -12.53583908 3.83246136 0 0 59
-8.31788063 -12.53666306 3.83057833 0 0 58
-8.32913208 -12.53918934 3.82955980 0 0 58
-8.34859848 -12.54061031 3.82625246 0 0 58
-8.36200523 -12.54319954 3.82463789 0 0 59
-8.37559319 -12.54491615 3.82192659 0 0 58
-8.39487648 -12.54721069 3.81971598 0 0 58
-8.40115547 -12.54826927 3.81902456 0 0 58
-8.41671562 -12.55091858 3.81681156 0 0 58
-8.43012047 -12.55350876 3.81519747 0 0 59
-8.44923782 -12.55408001 3.80886412 0 0 57
-8.46224594 -12.55531502 3.80734491 0 0 56
-8.47237587 -12.55738068 3.80559683 0 0 56
-8.49812508 -12.55986023 3.80159569 0 0 59
-8.51107788 -12.56332970 3.80011702 0 0 61
-8.51950645 -12.56445122 3.79882956 0 0 62
-8.53421593 -12.56662941 3.79684877 0 0 63
-8.54349899 -12.56822395 3.79533052 0 0 63
-8.55147934 -12.57022381 3.79417706 0 0 62
-8.57349586 -12.57306194 3.79017496 0 0 60
-8.57847214 -12.57452965 3.78984928 0 0 59
-8.58887291 -12.57658577 3.78906250 0 0 57
-8.59985542 -12.57912254 3.78708124 0 0 55
-8.61043930 -12.58030510 3.78519630 0 0 55
-8.61908531 -12.58365059 3.78491211 0 0 55
-8.62751770 -12.58476830 3.78362226 0 0 55
-8.64738464 -12.58754635 3.78021622 0 0 55
-8.66501617 -12.58939934 3.77534866 0 0 54
-8.67007065 -12.59172630 3.77708483 0 0 54
-8.68012428 -12.59293079 3.77327251 0 0 54
-8.69573402 -12.59334755 3.77102423 0 0 54
-8.69738197 -12.59652519 3.77059984 0 0 55
-8.71509743 -12.59923935 3.76779127 0 0 55
-8.72608185 -12.60177422 3.76581144 0 0 56
-8.74573517 -12.60232639 3.76140356 0 0 57
-8.73844719 -12.60476112 3.76552677 0 0 57
-8.74727631 -12.60723782 3.76414537 0 0 56
-8.76172066 -12.60942745 3.76119757 0 0 57
-8.76017761 -12.61294365 3.76270247 0 0 57
-8.78094864 -12.61395645 3.75902891 0 0 58
-8.79355240 -12.61657715 3.75452328 0 0 60
-8.80198479 -12.61769676 3.75323486 0 0 60
-8.80780792 -12.61963654 3.75267696 0 0 61
-8.82139778 -12.62135315 3.74996519 0 0 60
-8.81895256 -12.62663269 3.75173855 0 0 60
-8.83990860 -12.62677383 3.74696684 0 0 61
-8.83163643 -12.63011265 3.74929571 0 0 63
-8.85110664 -12.63153458 3.74598694 0 0 62
-8.85405540 -12.63430500 3.74520063 0 0 61
-8.85211182 -12.63646698 3.74679852 0 0 60
-8.87086487 -12.63878250 3.74266338 0 0 62
-8.86214066 -12.64300060 3.74512625 0 0 62
-8.89261627 -12.64162922 3.73769617 0 0 59
-8.87894821 -12.64747715 3.74258947 0 0 58
-8.89317513 -12.64744186 3.73864460 0 0 57
-8.91668701 -12.64900208 3.73317862 0 0 57
-8.88057327 -12.65599060 3.74430609 0 0 58
-8.91750908 -12.65480232 3.73508787 0 0 57
-8.91700363 -12.65792084 3.73526144 0 0 57
-8.91780281 -12.66062737 3.73506927 0 0 58
-8.92793274 -12.66269112 3.73331976 0 0 56
-8.93851852 -12.66387367 3.73143625 0 0 56
-8.93500710 -12.66645622 3.73243475 0 0 56
-8.94554138 -12.66987228 3.73059225 0 0 57
-8.93466187 -12.67403221 3.73365068 0 0 57
-8.95880890 -12.67383671 3.72695255 0 0 57
-8.94043350 -12.67820835 3.73313522 0 0 57
-8.94338417 -12.68097591 3.73234558 0 0 57
-8.96923447 -12.68172646 3.72518682 0 0 57
-8.94524765 -12.68638229 3.73292542 0 0 58
-8.97109604 -12.68712997 3.72576380 0 0 57
-8.97274208 -12.69030666 3.72534323 0 0 57
-8.97047997 -12.69471550 3.72601986 0 0 56
-8.97545624 -12.69618416 3.72569418 0 0 56
-8.97252846 -12.69925117 3.72549868 0 0 57
-8.97274208 -12.70147324 3.72650290 0 0 57
-8.96922874 -12.70405579 3.72750711 0 0 57
-8.96305656 -12.70969009 3.72927666 0 0 57
-8.95712471 -12.71222115 3.72991276 0 0 57
-8.95231056 -12.71521378 3.73127985 0 0 57
-8.95108223 -12.71922302 3.73062611 0 0 58
-8.94842148 -12.72227669 3.73139524 0 0 58
-8.93094635 -12.72762299 3.73422480 0 0 58
-8.96403313 -12.72543144 3.72606421 0 0 58
-8.95243454 -12.73048019 3.72829676 0 0 58
-8.94519806 -12.73342133 3.72929621 0 0 58
-8.93274879 -12.73799896 3.73176289 0 0 59
-8.91873360 -12.74299812 3.73362827 0 0 59
-8.91306496 -12.74551678 3.73522615 0 0 59
-8.88867378 -12.75155640 3.73998308 0 0 59
-8.86016273 -12.75660324 3.74483061 0 0 60
-8.84829712 -12.76166058 3.74610090 0 0 60
-8.83845329 -12.76542091 3.74783278 0 0 59
-8.84688568 -12.76654243 3.74654341 0 0 59
-6.75178289 -12.46190357 4.07834291 0 0 63
-6.82917738 -12.46264076 4.06622648 0 0 63
-7.58039904 -12.47612572 3.94727945 0 0 61
-7.61095476 -12.47834778 3.93882990 0 0 62
-7.64146185 -12.48007393 3.93349981 0 0 61
-7.66922998 -12.48125267 3.92996311 0 0 62
-7.69439363 -12.48325062 3.92715645 0 0 61
-7.71731997 -12.48432732 3.92288637 0 0 60
-7.74351740 -12.48592377 3.91875219 0 0 58
-7.76782942 -12.48745155 3.91617680 0 0 57
-7.79402494 -12.48904991 3.91204119 0 0 58
-7.81479788 -12.49006271 3.90836716 0 0 57
-7.84427023 -12.49218369 3.90436649 0 0 57
-7.86458921 -12.49407768 3.90082836 0 0 59
-7.88432360 -12.49549389 3.89848375 0 0 60
-7.90836763 -12.49702740 3.89494467 0 0 61
-7.93480444 -12.49825859 3.88658857 0 0 63
-7.94900751 -12.50081444 3.88786650 0 0 63
-7.97570658 -12.50203609 3.88047457 0 0 61
-7.99956560 -12.50444412 3.87803555 0 0 60
-8.01603127 -12.50533295 3.87555361 0 0 59
-8.03661728 -12.50721359 3.87298012 0 0 58
-8.05693626 -12.50911045 3.86943960 0 0 57
-8.07725906 -12.51100349 3.86590052 0 0 56
-8.09869385 -12.51335812 3.86309719 0 0 57
-8.11470413 -12.51512909 3.86074638 0 0 58
-8.13417435 -12.51655006 3.85743952 0 0 57
-8.15130424 -12.51878452 3.85582685 0 0 59
-8.16861916 -12.52014160 3.85311413 0 0 58
-8.19074249 -12.52124786 3.84595203 0 0 58
-8.20409966 -12.52333260 3.84746122 0 0 59
-8.22949409 -12.52496433 3.84043360 0 0 60
-8.24420357 -12.52714252 3.83845282 0 0 60
-8.26452255 -12.52903557 3.83491421 0 0 60
-8.27667999 -12.52980042 3.83362913 0 0 59
-8.29654694 -12.53257561 3.83022404 0 0 60
-8.31340790 -12.53481674 3.82764959 0 0 59
-8.32856750 -12.53611374 3.82553148 0 0 58
-8.33897018 -12.53816700 3.82474422 0 0 58
-8.35798454 -12.54047203 3.82157087 0 0 58
-8.37184143 -12.54217815 3.81982136 0 0 59
-8.38654900 -12.54435730 3.81784344 0 0 59
-8.40556717 -12.54666519 3.81466818 0 0 59
-8.41184425 -12.54771805 3.81397867 0 0 58
-8.42740250 -12.55037117 3.81176615 0 0 58
-8.44126320 -12.55207920 3.81001425 0 0 58
-8.45992851 -12.55353165 3.80381918 0 0 57
-8.47423744 -12.55435753 3.80193472 0 0 56
-8.48378754 -12.55593872 3.80137873 0 0 56
-8.51011658 -12.55890179 3.79618406 0 0 58
-8.52221870 -12.56189919 3.79493475 0 0 61
-8.53064919 -12.56301975 3.79364777 0 0 61
-8.54405403 -12.56561089 3.79203224 0 0 62
-8.55445480 -12.56766319 3.79124784 0 0 62
-8.56458664 -12.56972885 3.78949642 0 0 60
-8.58660698 -12.57256699 3.78549576 0 0 60
-8.59073067 -12.57356453 3.78540230 0 0 60
-8.60086441 -12.57562733 3.78365040 0 0 58
-8.61211395 -12.57815361 3.78263378 0 0 56
-8.62485313 -12.57939911 3.78015280 0 0 56
-8.63395119 -12.58186150 3.77973032 0 0 55
-8.64107895 -12.58338928 3.77880716 0 0 55
-8.66022682 -12.58705997 3.77457523 0 0 55
-8.67812538 -12.58890152 3.77066946 0 0 54
-8.68448257 -12.59082317 3.77203846 0 0 54
-8.69498634 -12.59114361 3.76809454 0 0 54
-8.71073151 -12.59292316 3.76478291 0 0 54
-8.71309853 -12.59521103 3.76518917 0 0 55
-8.73081207 -12.59792328 3.76238012 0 0 55
-8.74224663 -12.59957790 3.76026583 0 0 56
-8.75988007 -12.60143089 3.75539494 0 0 57
-8.75546837 -12.60303879 3.75975084 0 0 57
-8.76384544 -12.60639381 3.75850010 0 0 56
-8.78044128 -12.60864449 3.75496054 0 0 57
-8.77634430 -12.61074638 3.75715494 0 0 57
-8.79666519 -12.61263943 3.75361776 0 0 58
-8.80796623 -12.61566925 3.74947786 0 0 59
-8.81527901 -12.61632919 3.74745750 0 0 59
-8.82325554 -12.61833000 3.74630451 0 0 59
-8.83581161 -12.62044811 3.74492073 0 0 59
-8.83623695 -12.62489891 3.74692488 0 0 60
-8.85777855 -12.62552071 3.74095678 0 0 60
-8.84865570 -12.62838745 3.74351931 0 0 61
-8.86682129 -12.63022041 3.74057770 0 0 62
-8.86977005 -12.63299084 3.73978806 0 0 60
-8.86998558 -12.63521385 3.74079084 0 0 60
-8.88815117 -12.63704491 3.73784781 0 0 61
-8.88203430 -12.64044571 3.73958063 0 0 61
-8.91049004 -12.64037609 3.73169088 0 0 60
-8.89969444 -12.64539528 3.73681355 0 0 57
-8.91261673 -12.64576912 3.73323345 0 0 57
-8.93657875 -12.64644241 3.72763395 0 0 57
-8.90365410 -12.65309525 3.73683500 0 0 57
-8.93798637 -12.65272808 3.72834682 0 0 57
-8.94093704 -12.65549850 3.72756052 0 0 56
-8.94330597 -12.65778637 3.72796297 0 0 56
-8.94737434 -12.66101837 3.72791052 0 0 56
-8.95684242 -12.66174030 3.72529364 0 0 56
-8.95444870 -12.66478157 3.72702646 0 0 57
-8.96583366 -12.66867447 3.72495031 0 0 57
-8.95514107 -12.67196083 3.72691393 0 0 57
-8.97928429 -12.67176342 3.72021294 0 0 56
-8.95960617 -12.67654419 3.72676039 0 0 57
-8.96327782 -12.67842197 3.72680140 0 0 57
-8.99127769 -12.67923546 3.71904373 0 0 56
-8.96684074 -12.68477058 3.72691822 0 0 57
-8.99359322 -12.68375587 3.71949148 0 0 57
-8.99694443 -12.68787575 3.71860266 0 0 56
-8.99383163 -12.69181442 3.71951199 0 0 56
-8.99880409 -12.69328213 3.71918821 0 0 56
-8.99587631 -12.69634628 3.71899319 0 0 57
-8.99609184 -12.69857216 3.71999693 0 0 57
-8.99427986 -12.70209694 3.72053623 0 0 57
-8.98986435 -12.70644188 3.72180700 0 0 57
-8.98523712 -12.70856285 3.72207403 0 0 57
-8.98212242 -12.71249962 3.72298098 0 0 57
-8.98246574 -12.71608448 3.72292471 0 0 58
-8.98025894 -12.71826172 3.72356176 0 0 58
-8.96650696 -12.72324753 3.72639132 0 0 58
-8.99541473 -12.72229671 3.71836376 0 0 58
-8.98597145 -12.72740650 3.72000122 0 0 58
-8.98160744 -12.72951794 3.72123384 0 0 58
-8.97131348 -12.73415661 3.72309971 0 0 58
-8.95644379 -12.73868561 3.72519827 0 0 58
-8.95293236 -12.74126720 3.72620058 0 0 58
-8.93200111 -12.74696064 3.72998953 0 0 58
-8.90563965 -12.75206757 3.73424292 0 0 59
-8.89319229 -12.75664711 3.73671055 0 0 60
-8.87199020 -12.76234818 3.73953438 0 0 61
-8.86847878 -12.76493073 3.74053812 0 0 61
-8.87255096 -12.76815987 3.74048233 0 0 60
-6.77887106 -12.41124439 4.07028437 0 0 59
-6.80356073 -12.46426010 4.06608295 0 0 65
-7.58175230 -12.47621918 3.94379139 0 0 61
-7.61145830 -12.47797203 3.93557119 0 0 62
-7.64196253 -12.47969818 3.93024492 0 0 60
-7.67058325 -12.48134708 3.92647457 0 0 62
-7.69619799 -12.48246384 3.92353535 0 0 62
-7.72109270 -12.48447418 3.91976547 0 0 61
-7.74643946 -12.48560143 3.91586256 0 0 59
-7.77048349 -12.48713493 3.91232347 0 0 58
-7.79641390 -12.48874569 3.90722466 0 0 58
-7.81915712 -12.49069118 3.90405083 0 0 56
-7.84907770 -12.49193287 3.89991665 0 0 57
-7.86881495 -12.49334335 3.89757299 0 0 58
-7.88913393 -12.49523735 3.89403486 0 0 60
-7.91317797 -12.49677277 3.89049482 0 0 61
-7.93987989 -12.49799538 3.88310337 0 0 63
-7.95408583 -12.50055313 3.88437891 0 0 63
-7.98078299 -12.50177383 3.87698841 0 0 61
-8.00482750 -12.50330925 3.87345219 0 0 61
-8.02214241 -12.50466728 3.87074041 0 0 60
-8.04358101 -12.50702572 3.86792994 0 0 59
-8.06304932 -12.50844574 3.86462259 0 0 58
-8.08363342 -12.51033115 3.86205053 0 0 56
-8.10480881 -12.51269722 3.85827637 0 0 57
-8.12239075 -12.51404476 3.85652971 0 0 57
-8.14355850 -12.51641083 3.85276031 0 0 57
-8.15786934 -12.51723480 3.85087490 0 0 58
-8.17715073 -12.51953125 3.84866619 0 0 58
-8.19927597 -12.52063656 3.84150219 0 0 58
-8.21263123 -12.52272415 3.84300947 0 0 59
-8.23717690 -12.52388191 3.83621645 0 0 60
-8.25273705 -12.52653122 3.83400631 0 0 60
-8.27332497 -12.52841377 3.83142948 0 0 59
-8.28606415 -12.52966213 3.82894659 0 0 59
-8.30508041 -12.53196430 3.82577324 0 0 60
-8.32324409 -12.53379440 3.82283020 0 0 60
-8.33795166 -12.53597355 3.82085085 0 0 58
-8.34835434 -12.53802681 3.82006407 0 0 58
-8.36782074 -12.53945160 3.81675768 0 0 58
-8.38253021 -12.54162979 3.81477547 0 0 59
-8.39638710 -12.54333496 3.81302786 0 0 59
-8.41540527 -12.54564095 3.80985403 0 0 59
-8.42168236 -12.54669857 3.80916071 0 0 59
-8.43854332 -12.54894066 3.80658579 0 0 57
-8.45109558 -12.55105782 3.80520391 0 0 57
-8.47263908 -12.55168152 3.79923391 0 0 56
-8.48622894 -12.55340004 3.79652166 0 0 56
-8.49577904 -12.55498219 3.79596567 0 0 56
-8.52192307 -12.55881500 3.79187155 0 0 58
-8.53317261 -12.56134224 3.79085398 0 0 60
-8.54133797 -12.56247139 3.78860235 0 0 60
-8.55604553 -12.56464958 3.78662205 0 0 60
-8.56559563 -12.56623077 3.78606462 0 0 60
-8.57657433 -12.56876755 3.78408480 0 0 60
-8.59774971 -12.57113647 3.78031492 0 0 61
-8.60187149 -12.57213211 3.78021955 0 0 61
-8.61200714 -12.57419586 3.77847099 0 0 59
-8.62455750 -12.57631207 3.77708912 0 0 57
-8.63971901 -12.57761097 3.77497005 0 0 57
-8.64679337 -12.58137417 3.77408838 0 0 56
-8.65464020 -12.58201218 3.77399397 0 0 55
-8.67639732 -12.58486176 3.76903009 0 0 55
-8.69141960 -12.58753395 3.76489019 0 0 55
-8.69778061 -12.58945465 3.76626253 0 0 54
-8.70809364 -12.59064674 3.76341248 0 0 54
-8.72344208 -12.59107208 3.76019859 0 0 55
-8.72665787 -12.59383297 3.76037741 0 0 55
-8.74567604 -12.59613419 3.75720167 0 0 55
-8.75724220 -12.59915257 3.75402641 0 0 56
-8.77343941 -12.60004997 3.75058174 0 0 58
-8.76961327 -12.60214043 3.75374365 0 0 58
-8.78086472 -12.60466862 3.75272369 0 0 57
-8.79615784 -12.60732841 3.74954939 0 0 59
-8.79421616 -12.60949135 3.75114775 0 0 58
-8.81583595 -12.61097527 3.74724340 0 0 59
-8.82368088 -12.61435318 3.74406719 0 0 58
-8.83256721 -12.61458969 3.74264383 0 0 58
-8.83766747 -12.61742401 3.74125862 0 0 57
-8.85125923 -12.61914158 3.73854589 0 0 58
-8.85280609 -12.62405396 3.74128294 0 0 60
-8.87264061 -12.62373066 3.73577929 0 0 61
-8.86697769 -12.62625122 3.73737621 0 0 61
-8.88384056 -12.62849426 3.73480082 0 0 62
-8.88679123 -12.63126373 3.73401308 0 0 60
-8.88570023 -12.63389397 3.73537970 0 0 59
-8.90647507 -12.63491058 3.73170662 0 0 60
-8.89990425 -12.63919449 3.73357487 0 0 61
-8.92490005 -12.63946915 3.72664547 0 0 60
-8.91886520 -12.64373016 3.73044062 0 0 57
-8.93048859 -12.64451408 3.72722626 0 0 57
-8.95359802 -12.64472008 3.72185755 0 0 57
-8.92309570 -12.65142155 3.73142576 0 0 56
-8.95585823 -12.65147591 3.72233868 0 0 57
-8.95952988 -12.65335274 3.72237921 0 0 56
-8.96248055 -12.65612221 3.72159290 0 0 56
-8.96654510 -12.65935421 3.72153807 0 0 56
-8.97628212 -12.66006470 3.71988297 0 0 56
-8.97362328 -12.66311836 3.72065544 0 0 57
-8.98415375 -12.66653633 3.71880674 0 0 57
-8.97587967 -12.66987610 3.72113800 0 0 56
-8.99917984 -12.66920757 3.71466970 0 0 56
-8.98034859 -12.67446136 3.72098589 0 0 56
-8.98460197 -12.67682266 3.71983099 0 0 56
-9.01417542 -12.67721176 3.71267176 0 0 56
-8.98992348 -12.68187904 3.71944857 0 0 57
-9.01707458 -12.68221664 3.71192312 0 0 57
-9.02114296 -12.68544960 3.71186686 0 0 56
-9.01672745 -12.68979263 3.71313715 0 0 56
-9.02273941 -12.69086170 3.71148205 0 0 56
-9.02007675 -12.69391537 3.71225500 0 0 57
-9.02114105 -12.69661331 3.71302462 0 0 57
-9.01893425 -12.69878483 3.71366262 0 0 57
-9.01621819 -12.70407295 3.71447420 0 0 57
-9.01270866 -12.70665741 3.71547365 0 0 57
-9.00892830 -12.70924950 3.71551275 0 0 57
-9.00927353 -12.71283817 3.71545458 0 0 58
-9.00791931 -12.71548080 3.71586084 0 0 58
-8.99632072 -12.72053051 3.71809244 0 0 58
-9.02594757 -12.71868610 3.71089315 0 0 58
-9.01735687 -12.72427559 3.71229982 0 0 58
-9.01514626 -12.72644711 3.71293592 0 0 58
-9.00660515 -12.72979450 3.71430206 0 0 58
-8.99761581 -12.73402596 3.71580553 0 0 58
-8.99383736 -12.73662090 3.71584225 0 0 58
-8.98008537 -12.74160767 3.71867132 0 0 58
-8.95484543 -12.74717712 3.72365665 0 0 58
-8.93997383 -12.75170135 3.72575665 0 0 58
-8.91446495 -12.75727940 3.72977829 0 0 60
-8.90592766 -12.76062870 3.73114538 0 0 60
-8.88368797 -12.76673222 3.73530245 0 0 61
-8.89709473 -12.76931763 3.73368788 0 0 58
-6.82163572 -12.41199970 4.06050539 0 0 59
-6.81640482 -12.46377563 4.06044292 0 0 67
-7.64331579 -12.47978687 3.92675781 0 0 60
-7.67193556 -12.48144150 3.92298889 0 0 61
-7.69754934 -12.48255730 3.92004728 0 0 62
-7.72289610 -12.48368359 3.91614389 0 0 62
-7.74882841 -12.48529243 3.91104460 0 0 60
-7.77313852 -12.48681831 3.90847254 0 0 60
-7.79933882 -12.48841858 3.90433645 0 0 58
-7.82337904 -12.48995399 3.90079498 0 0 55
-7.85285425 -12.49207687 3.89679527 0 0 57
-7.87232256 -12.49350071 3.89348936 0 0 58
-7.89421225 -12.49497223 3.89054632 0 0 58
-7.91825533 -12.49651051 3.88700914 0 0 61
-7.94468737 -12.49774361 3.87865591 0 0 62
-7.95934916 -12.49941635 3.87979555 0 0 63
-7.98689699 -12.50111008 3.87217283 0 0 60
-8.01075554 -12.50351906 3.86973381 0 0 60
-8.02807045 -12.50487709 3.86702013 0 0 60
-8.05081177 -12.50682449 3.86384916 0 0 60
-8.07028008 -12.50824547 3.86053944 0 0 59
-8.09060097 -12.51014137 3.85700083 0 0 57
-8.11248970 -12.51161385 3.85405874 0 0 57
-8.13092422 -12.51343536 3.85207987 0 0 57
-8.15124321 -12.51532745 3.84853935 0 0 57
-8.16595078 -12.51750946 3.84656000 0 0 57
-8.18438148 -12.51933002 3.84458208 0 0 57
-8.20781136 -12.52002811 3.83705378 0 0 57
-8.22089958 -12.52212143 3.83759737 0 0 58
-8.24414062 -12.52368927 3.83117056 0 0 58
-8.26041985 -12.52544689 3.82978630 0 0 59
-8.28185844 -12.52780247 3.82698011 0 0 59
-8.29459763 -12.52904987 3.82449770 0 0 59
-8.31361580 -12.53135300 3.82132578 0 0 60
-8.33177757 -12.53318596 3.81838369 0 0 59
-8.34693909 -12.53448200 3.81626987 0 0 58
-8.35819054 -12.53700733 3.81524849 0 0 58
-8.37766075 -12.53843117 3.81193876 0 0 59
-8.39263535 -12.54060173 3.81092358 0 0 59
-8.40622330 -12.54231644 3.80821323 0 0 59
-8.42524147 -12.54461861 3.80503988 0 0 59
-8.43151855 -12.54567814 3.80434799 0 0 59
-8.45053482 -12.54798317 3.80117512 0 0 57
-8.46309090 -12.55010033 3.79979372 0 0 57
-8.48462868 -12.55072403 3.79382420 0 0 57
-8.49848747 -12.55243015 3.79207277 0 0 57
-8.50776863 -12.55402184 3.79055691 0 0 57
-8.53306007 -12.55738449 3.78669024 0 0 58
-8.54301262 -12.56031990 3.78603697 0 0 58
-8.55117607 -12.56145096 3.78378630 0 0 58
-8.56830406 -12.56368065 3.78217268 0 0 59
-8.57758713 -12.56527424 3.78065348 0 0 58
-8.58856964 -12.56781197 3.77867079 0 0 59
-8.60758400 -12.57011414 3.77550220 0 0 60
-8.61256027 -12.57158279 3.77517509 0 0 60
-8.62341118 -12.57275581 3.77425241 0 0 59
-8.63766861 -12.57581329 3.77240849 0 0 58
-8.65040779 -12.57706070 3.76992798 0 0 59
-8.65820122 -12.57993507 3.76987028 0 0 57
-8.66878510 -12.58111763 3.76798725 0 0 56
-8.69211197 -12.58354759 3.76361704 0 0 56
-8.70498085 -12.58615494 3.76007748 0 0 55
-8.71133995 -12.58807373 3.76144838 0 0 55
-8.72008705 -12.58968830 3.75800180 0 0 55
-8.73785400 -12.59016514 3.75515223 0 0 55
-8.73995590 -12.59246349 3.75459576 0 0 55
-8.76008797 -12.59522915 3.75215578 0 0 56
-8.76995659 -12.59730530 3.74944258 0 0 56
-8.78830719 -12.59826374 3.74540281 0 0 58
-8.78232574 -12.60029221 3.74915743 0 0 58
-8.79416084 -12.60329914 3.74694681 0 0 59
-8.80886841 -12.60547924 3.74496603 0 0 61
-8.80908203 -12.60770321 3.74596930 0 0 60
-8.83070374 -12.60918808 3.74206305 0 0 61
-8.84025002 -12.61350918 3.73842669 0 0 58
-8.84801292 -12.61328697 3.73626900 0 0 57
-8.85338593 -12.61610603 3.73584795 0 0 56
-8.86612701 -12.61735249 3.73336697 0 0 57
-8.86740303 -12.62227535 3.73514032 0 0 60
-8.88620567 -12.62235451 3.73096371 0 0 59
-8.88138962 -12.62534618 3.73233223 0 0 62
-8.89740372 -12.62711716 3.72998524 0 0 62
-8.90381241 -12.62953758 3.72823668 0 0 60
-8.90402412 -12.63176250 3.72923803 0 0 59
-8.92304039 -12.63406563 3.72606516 0 0 60
-8.91561890 -12.63787651 3.72816229 0 0 61
-8.94107056 -12.63727093 3.72109890 0 0 60
-8.93503380 -12.64153290 3.72489405 0 0 58
-8.94665527 -12.64231777 3.72168112 0 0 58
-8.96931648 -12.64340401 3.71644640 0 0 57
-8.94141769 -12.64928436 3.72528410 0 0 57
-8.97287750 -12.64974976 3.71656084 0 0 57
-8.97739792 -12.65209961 3.71637392 0 0 56
-8.97949791 -12.65439606 3.71581459 0 0 56
-8.98617554 -12.65680885 3.71503019 0 0 56
-8.99675941 -12.65799141 3.71314144 0 0 57
-8.99652290 -12.66110039 3.71428013 0 0 58
-9.00619888 -12.66404343 3.71266508 0 0 57
-8.99635887 -12.66780472 3.71439934 0 0 56
-9.02077103 -12.66759968 3.70866489 0 0 56
-9.00324821 -12.67243958 3.71461487 0 0 56
-9.00664902 -12.67432594 3.71368837 0 0 56
-9.03550529 -12.67561054 3.70570374 0 0 56
-9.01282120 -12.67985725 3.71307802 0 0 57
-9.03912354 -12.67972374 3.70577955 0 0 57
-9.04449272 -12.68254662 3.70535803 0 0 57
-9.04092789 -12.68736267 3.70640087 0 0 57
-9.04635620 -12.68794823 3.70593691 0 0 57
-9.04427719 -12.69148350 3.70551777 0 0 57
-9.04534340 -12.69418144 3.70628786 0 0 57
-9.04443741 -12.69594383 3.70655775 0 0 57
-9.04172325 -12.70123482 3.70736742 0 0 57
-9.03821373 -12.70381737 3.70836973 0 0 57
-9.03685570 -12.70646095 3.70877504 0 0 57
-9.03608322 -12.70958710 3.70798588 0 0 58
-9.03557777 -12.71270466 3.70816088 0 0 58
-9.02555084 -12.71733665 3.71098852 0 0 58
-9.05360413 -12.71591187 3.70319510 0 0 59
-9.04788589 -12.72066593 3.70483255 0 0 58
-9.04626083 -12.72332287 3.70427465 0 0 58
-9.03884125 -12.72713280 3.70637274 0 0 58
-9.03115463 -12.73095417 3.70750809 0 0 58
-9.02939415 -12.73224449 3.70800829 0 0 58
-9.02080536 -12.73782730 3.70941353 0 0 59
-9.00189209 -12.74221992 3.71366930 0 0 58
-8.99178505 -12.74598980 3.71443796 0 0 58
-8.96712685 -12.75204086 3.71822977 0 0 58
-8.95643425 -12.75532722 3.72019339 0 0 58
-8.91852951 -12.76324844 3.72663927 0 0 60
-8.90719795 -12.76828957 3.72983646 0 0 60
-8.91451263 -12.76894855 3.72781563 0 0 59
-8.92536354 -12.77011967 3.72689199 0 0 58
-7.64381742 -12.47941017 3.92350149 0 0 60
-7.67243624 -12.48106384 3.91973257 0 0 60
-7.69805098 -12.48217964 3.91679001 0 0 62
-7.72398138 -12.48378849 3.91169262 0 0 62
-7.75089884 -12.48449516 3.90838528 0 0 61
-7.77449083 -12.48691368 3.90498209 0 0 60
-7.80199289 -12.48810196 3.90048027 0 0 58
-7.82734060 -12.48922729 3.89657688 0 0 55
-7.85550547 -12.49176121 3.89294624 0 0 56
-7.87713099 -12.49324417 3.88903952 0 0 57
-7.89902067 -12.49472046 3.88610029 0 0 58
-7.92306566 -12.49625587 3.88256073 0 0 60
-7.94976377 -12.49747849 3.87516785 0 0 60
-7.96397066 -12.50003242 3.87644386 0 0 62
-7.99197435 -12.50084686 3.86868620 0 0 60
-8.01601791 -12.50238419 3.86514711 0 0 60
-8.03445053 -12.50420284 3.86316872 0 0 60
-8.05607224 -12.50568581 3.85926199 0 0 61
-8.07580948 -12.50710106 3.85691833 0 0 60
-8.09828186 -12.50905609 3.85278177 0 0 57
-8.12102127 -12.51100159 3.84960938 0 0 57
-8.13945580 -12.51282501 3.84763098 0 0 57
-8.15847397 -12.51512814 3.84445667 0 0 57
-8.17448235 -12.51689529 3.84211159 0 0 57
-8.19291687 -12.51871872 3.84013271 0 0 57
-8.21549416 -12.51894188 3.83283520 0 0 57
-8.22813034 -12.52191925 3.83351469 0 0 58
-8.25312805 -12.52219582 3.82658434 0 0 57
-8.26895523 -12.52483749 3.82533884 0 0 58
-8.29012299 -12.52720261 3.82156610 0 0 59
-8.30312920 -12.52843857 3.82004833 0 0 60
-8.32214546 -12.53074074 3.81687546 0 0 60
-8.34031296 -12.53257370 3.81393242 0 0 59
-8.35632324 -12.53434563 3.81158686 0 0 58
-8.36717987 -12.53551579 3.81066513 0 0 59
-8.38749695 -12.53740883 3.80712605 0 0 60
-8.40332222 -12.54004955 3.80587959 0 0 59
-8.41606331 -12.54129791 3.80339670 0 0 59
-8.43377495 -12.54401016 3.80059052 0 0 58
-8.44090271 -12.54553890 3.79966879 0 0 58
-8.46148872 -12.54742050 3.79709387 0 0 58
-8.47404480 -12.54954052 3.79570913 0 0 57
-8.49558640 -12.55016518 3.78974199 0 0 58
-8.50832367 -12.55140591 3.78725863 0 0 58
-8.51872253 -12.55346298 3.78647423 0 0 58
-8.54290009 -12.55636215 3.78187370 0 0 57
-8.55500031 -12.55936337 3.78062534 0 0 57
-8.56388474 -12.55959988 3.77920341 0 0 57
-8.57899094 -12.56313133 3.77712870 0 0 58
-8.58939171 -12.56518745 3.77634144 0 0 57
-8.59997559 -12.56637096 3.77445507 0 0 58
-8.61853981 -12.56955719 3.77141809 0 0 58
-8.62324715 -12.57103348 3.77012825 0 0 58
-8.63495255 -12.57267952 3.76897573 0 0 59
-8.64880943 -12.57438469 3.76722622 0 0 59
-8.66154861 -12.57563210 3.76474667 0 0 59
-8.67149544 -12.57856750 3.76409101 0 0 57
-8.68365288 -12.57933235 3.76280499 0 0 57
-8.70410156 -12.58258724 3.75820780 0 0 58
-8.71939468 -12.58524895 3.75503540 0 0 56
-8.72705650 -12.58675766 3.75603676 0 0 55
-8.73410416 -12.58742905 3.75305271 0 0 55
-8.75115013 -12.58879662 3.74937773 0 0 55
-8.75351906 -12.59108639 3.74978495 0 0 56
-8.77253151 -12.59338951 3.74660826 0 0 57
-8.78567123 -12.59599018 3.74403238 0 0 57
-8.80401993 -12.59694862 3.73999166 0 0 58
-8.79673576 -12.59938335 3.74411297 0 0 58
-8.80641556 -12.60233402 3.74249887 0 0 59
-8.82085609 -12.60452080 3.73955393 0 0 61
-8.82349396 -12.60680008 3.74092388 0 0 62
-8.84138870 -12.60863972 3.73701906 0 0 62
-8.85268974 -12.61166859 3.73288012 0 0 58
-8.86157417 -12.61190796 3.73145533 0 0 56
-8.86955452 -12.61390877 3.73030233 0 0 56
-8.88098907 -12.61556721 3.72818518 0 0 56
-8.88226891 -12.62048531 3.72995949 0 0 59
-8.90277290 -12.62150764 3.72532225 0 0 58
-8.89495277 -12.62396812 3.72752142 0 0 60
-8.91181564 -12.62620735 3.72494078 0 0 60
-8.91737175 -12.62816048 3.72342205 0 0 60
-8.91888809 -12.62997437 3.72405863 0 0 60
-8.93790436 -12.63227558 3.72088671 0 0 60
-8.93133545 -12.63656044 3.72275400 0 0 61
-8.95678520 -12.63595772 3.71568918 0 0 59
-8.95160294 -12.64068985 3.71925402 0 0 58
-8.96237183 -12.64100266 3.71626902 0 0 58
-8.98633194 -12.64167976 3.71067095 0 0 57
-8.95928764 -12.64803410 3.71927929 0 0 57
-8.99146652 -12.64760590 3.71138668 0 0 57
-8.99572182 -12.64996433 3.71023226 0 0 56
-9.00024223 -12.65231514 3.71003866 0 0 56
-9.00561523 -12.65513611 3.70962000 0 0 57
-9.01508141 -12.65585709 3.70700121 0 0 58
-9.01614761 -12.65855312 3.70777178 0 0 60
-9.02883148 -12.66203499 3.70533276 0 0 58
-9.01580048 -12.66613007 3.70898676 0 0 56
-9.04255295 -12.66511726 3.70155954 0 0 56
-9.02502823 -12.66995716 3.70750999 0 0 56
-9.02824593 -12.67271614 3.70768261 0 0 56
-9.05885506 -12.67270851 3.69919348 0 0 57
-9.03441429 -12.67824554 3.70707083 0 0 57
-9.06116867 -12.67723083 3.69963980 0 0 57
-9.06582069 -12.68094444 3.69839001 0 0 58
-9.06427956 -12.68446064 3.69989443 0 0 58
-9.06898689 -12.68593788 3.69860601 0 0 57
-9.06762886 -12.68858242 3.69900703 0 0 57
-9.06999588 -12.69087029 3.69941568 0 0 57
-9.06949043 -12.69398689 3.69958735 0 0 57
-9.06722641 -12.69839478 3.70026398 0 0 57
-9.06371689 -12.70097542 3.70126390 0 0 58
-9.06235886 -12.70362186 3.70167160 0 0 57
-9.06355476 -12.70768452 3.70138359 0 0 58
-9.06350136 -12.70991707 3.70142317 0 0 58
-9.05451012 -12.71414852 3.70292187 0 0 59
-9.08126259 -12.71313286 3.69549227 0 0 59
-9.07769966 -12.71794891 3.69653177 0 0 58
-9.07548904 -12.72012329 3.69716978 0 0 58
-9.06910706 -12.72353458 3.69793987 0 0 58
-9.06168556 -12.72734642 3.70003939 0 0 58
-9.05920982 -12.72952652 3.69971132 0 0 59
-9.05133629 -12.73422146 3.70194578 0 0 59
-9.03803635 -12.73832989 3.70463800 0 0 59
-9.03295517 -12.74133110 3.70504522 0 0 59
-9.01835251 -12.74584579 3.70810747 0 0 58
-9.01066399 -12.74966908 3.70924425 0 0 58
-8.96948814 -12.75706673 3.71555090 0 0 58
-8.94118881 -12.76433372 3.72140169 0 0 60
-8.93956566 -12.76698971 3.72084665 0 0 60
-8.93147659 -12.76945782 3.72207737 0 0 59
-8.94618416 -12.77163601 3.72009897 0 0 57
-8.96471977 -12.77172565 3.71495724 0 0 57
-6.84178400 -12.41491127 4.04975843 0 0 63
-7.67266989 -12.48069382 3.91551304 0 0 61
-7.69913721 -12.48228264 3.91234064 0 0 61
-7.72533369 -12.48388100 3.90820551 0 0 60
-7.75310469 -12.48506069 3.90466833 0 0 60
-7.77629614 -12.48612595 3.90136194 0 0 60
-7.80464983 -12.48778725 3.89662838 0 0 57
-7.83169985 -12.48985577 3.89226151 0 0 56
-7.85816240 -12.49144554 3.88909006 0 0 56
-7.88265944 -12.49210167 3.88541937 0 0 57
-7.90298128 -12.49399567 3.88187599 0 0 58
-7.92787409 -12.49600220 3.87810898 0 0 60
-7.95372534 -12.49675083 3.87094784 0 0 59
-7.96877813 -12.49978065 3.87199450 0 0 60
-7.99678373 -12.50059319 3.86423683 0 0 59
-8.02194405 -12.50259018 3.86142969 0 0 59
-8.04141235 -12.50401115 3.85812330 0 0 59
-8.06115150 -12.50542450 3.85577726 0 0 61
-8.08146858 -12.50732040 3.85223627 0 0 60
-8.10466385 -12.50838089 3.84892988 0 0 59
-8.12825584 -12.51080036 3.84552717 0 0 58
-8.14557076 -12.51216030 3.84281683 0 0 58
-8.16458702 -12.51446342 3.83964205 0 0 58
-8.18086433 -12.51622200 3.83826065 0 0 58
-8.20118332 -12.51811790 3.83471918 0 0 57
-8.22245979 -12.51875210 3.82778788 0 0 58
-8.23536301 -12.52172089 3.82942963 0 0 57
-8.26251411 -12.52205849 3.82190609 0 0 56
-8.27663803 -12.52375317 3.82111931 0 0 57
-8.29780769 -12.52611923 3.81734896 0 0 59
-8.31166840 -12.52782726 3.81559992 0 0 59
-8.33068085 -12.53013134 3.81242800 0 0 59
-8.35015106 -12.53155136 3.80911636 0 0 58
-8.36485863 -12.53373337 3.80713797 0 0 58
-8.37656403 -12.53537560 3.80598688 0 0 59
-8.39760399 -12.53637791 3.80327368 0 0 60
-8.41185570 -12.53943920 3.80142975 0 0 61
-8.42544937 -12.54115677 3.79871893 0 0 59
-8.44446564 -12.54346085 3.79554415 0 0 57
-8.45074081 -12.54451561 3.79485226 0 0 58
-8.47002411 -12.54681110 3.79264116 0 0 58
-8.48388100 -12.54852104 3.79089212 0 0 58
-8.50542450 -12.54914379 3.78492689 0 0 59
-8.51771164 -12.55127144 3.78257895 0 0 60
-8.52771187 -12.55197048 3.78188801 0 0 60
-8.55273628 -12.55534172 3.77706099 0 0 57
-8.56614304 -12.55793285 3.77544451 0 0 57
-8.57672882 -12.55911255 3.77356005 0 0 56
-8.59098244 -12.56217384 3.77171564 0 0 57
-8.60053062 -12.56375694 3.77115965 0 0 57
-8.60981560 -12.56534958 3.76964331 0 0 57
-8.63053131 -12.56859779 3.76600647 0 0 57
-8.63465691 -12.56959343 3.76591063 0 0 57
-8.64608955 -12.57124710 3.76379490 0 0 58
-8.65976334 -12.57382774 3.76314592 0 0 59
-8.67380714 -12.57466125 3.76029539 0 0 59
-8.68460274 -12.57806969 3.75941563 0 0 58
-8.69433784 -12.57878017 3.75776052 0 0 59
-8.71505737 -12.58202934 3.75412321 0 0 60
-8.73269081 -12.58388042 3.74925470 0 0 58
-8.74147034 -12.58585167 3.75099087 0 0 56
-8.74824715 -12.58653259 3.74704456 0 0 56
-8.76470947 -12.58741951 3.74456406 0 0 56
-8.76577568 -12.59011745 3.74533510 0 0 57
-8.78609657 -12.59201050 3.74179506 0 0 58
-8.80138588 -12.59467030 3.73862171 0 0 59
-8.81816673 -12.59605217 3.73398256 0 0 60
-8.81133461 -12.59760857 3.73797083 0 0 59
-8.81971359 -12.60096359 3.73672152 0 0 59
-8.83442307 -12.60314083 3.73473930 0 0 60
-8.83463478 -12.60536766 3.73574352 0 0 63
-8.85123253 -12.60762119 3.73220396 0 0 61
-8.86625290 -12.61028957 3.72806644 0 0 56
-8.87598991 -12.61100197 3.72641039 0 0 56
-8.88526917 -12.61259460 3.72489309 0 0 55
-8.89670753 -12.61425018 3.72277546 0 0 56
-8.89798164 -12.61916924 3.72454929 0 0 58
-8.91848946 -12.62019348 3.71991205 0 0 58
-8.90936661 -12.62306023 3.72247267 0 0 58
-8.92668152 -12.62442017 3.71976280 0 0 58
-8.93223572 -12.62636948 3.71824265 0 0 59
-8.93200111 -12.62947845 3.71937895 0 0 60
-8.95119858 -12.63090992 3.71510887 0 0 59
-8.94619942 -12.63477230 3.71757603 0 0 60
-8.97250366 -12.63464165 3.71027756 0 0 57
-8.96646500 -12.63890266 3.71407270 0 0 58
-8.97893906 -12.64015770 3.71062803 0 0 58
-9.00335121 -12.63994980 3.70489264 0 0 57
-8.97630501 -12.64630795 3.71350241 0 0 57
-9.00933647 -12.64635277 3.70537901 0 0 57
-9.01516151 -12.64829159 3.70482016 0 0 57
-9.01941681 -12.65065098 3.70366669 0 0 57
-9.02348518 -12.65388107 3.70360994 0 0 57
-9.03079796 -12.65454102 3.70158768 0 0 58
-9.02970886 -12.65717506 3.70295954 0 0 61
-9.04742050 -12.65988827 3.70015192 0 0 61
-9.03758049 -12.66364765 3.70188427 0 0 57
-9.06459999 -12.66262245 3.69541597 0 0 58
-9.04577446 -12.66787529 3.70173311 0 0 57
-9.05002594 -12.67023563 3.70057821 0 0 57
-9.07959938 -12.67062473 3.69341850 0 0 59
-9.05646133 -12.67575169 3.70092916 0 0 57
-9.08164597 -12.67515945 3.69289875 0 0 59
-9.08571434 -12.67838955 3.69284582 0 0 59
-9.08502197 -12.68237686 3.69411802 0 0 59
-9.09057999 -12.68432808 3.69259596 0 0 58
-9.09052467 -12.68656445 3.69263458 0 0 58
-9.09289169 -12.68885136 3.69304323 0 0 59
-9.09368896 -12.69155598 3.69285059 0 0 59
-9.09430504 -12.69513416 3.69375753 0 0 59
-9.09007263 -12.69860840 3.69392967 0 0 58
-9.08656120 -12.70119190 3.69493198 0 0 58
-9.08905983 -12.70484257 3.69427967 0 0 58
-9.08900452 -12.70707798 3.69431829 0 0 59
-9.08198357 -12.71224308 3.69632101 0 0 59
-9.10573006 -12.71069145 3.68971634 0 0 60
-9.10320282 -12.71511078 3.68942976 0 0 59
-9.10099411 -12.71728325 3.69006443 0 0 58
-9.09703064 -12.72074795 3.69120169 0 0 58
-9.09064674 -12.72415924 3.69197130 0 0 58
-9.08843803 -12.72633076 3.69260836 0 0 58
-9.08029747 -12.73103619 3.69387770 0 0 59
-9.06942177 -12.73519230 3.69694090 0 0 60
-9.06779480 -12.73784924 3.69638300 0 0 59
-9.05750084 -12.74248886 3.69824934 0 0 59
-9.05398750 -12.74506950 3.69925356 0 0 59
-9.02326775 -12.75228882 3.70473623 0 0 58
-8.99169350 -12.75903130 3.71045446 0 0 59
-8.98576164 -12.76156330 3.71108770 0 0 59
-8.96416473 -12.76591301 3.71401167 0 0 59
-8.95171165 -12.77049065 3.71647692 0 0 59
-8.97541046 -12.77117538 3.70991182 0 0 58
-7.69833326 -12.48231220 3.90945148 0 0 60
-7.72583532 -12.48350239 3.90494871 0 0 59
-7.75418806 -12.48516464 3.90021563 0 0 59
-7.77764940 -12.48622036 3.89787340 0 0 59
-7.80730581 -12.48746872 3.89277506 0 0 56
-7.83435392 -12.48954201 3.88840723 0 0 56
-7.86081743 -12.49112797 3.88523865 0 0 55
-7.88702059 -12.49272919 3.88110256 0 0 57
-7.90648317 -12.49414825 3.87779236 0 0 58
-7.93052912 -12.49568748 3.87425280 0 0 60
-7.95808268 -12.49737930 3.86663342 0 0 59
-7.97431231 -12.49863625 3.86837149 0 0 59
-8.00100899 -12.49985504 3.86097860 0 0 58
-8.02721024 -12.50145531 3.85684729 0 0 59
-8.04779243 -12.50333691 3.85426950 0 0 59
-8.06595993 -12.50517178 3.85132647 0 0 60
-8.08784866 -12.50664520 3.84838486 0 0 60
-8.11032295 -12.50860023 3.84424877 0 0 60
-8.13436890 -12.51013851 3.84071159 0 0 59
-8.15149689 -12.51236725 3.83909702 0 0 58
-8.17181778 -12.51426411 3.83555841 0 0 58
-8.18854904 -12.51513863 3.83404064 0 0 58
-8.20971680 -12.51750755 3.83026981 0 0 58
-8.23014259 -12.51766777 3.82356882 0 0 58
-8.24304390 -12.52063465 3.82521486 0 0 56
-8.27019691 -12.52097321 3.81768751 0 0 56
-8.28471947 -12.52402401 3.81680346 0 0 56
-8.30503654 -12.52591896 3.81326532 0 0 58
-8.31889534 -12.52762604 3.81151628 0 0 59
-8.33921814 -12.52951908 3.80797720 0 0 58
-8.35998726 -12.53053379 3.80430365 0 0 58
-8.37254143 -12.53264713 3.80292130 0 0 59
-8.38509369 -12.53476715 3.80153751 0 0 59
-8.40568352 -12.53664780 3.79896164 0 0 60
-8.41954041 -12.53835678 3.79721260 0 0 61
-8.43398094 -12.54054642 3.79426765 0 0 59
-8.45430183 -12.54244041 3.79072809 0 0 57
-8.46084404 -12.54348564 3.79100180 0 0 57
-8.47986412 -12.54579353 3.78782749 0 0 58
-8.49326515 -12.54837990 3.78621435 0 0 59
-8.51525879 -12.54812241 3.78011084 0 0 60
-8.52669525 -12.54977798 3.77799463 0 0 60
-8.53624535 -12.55135727 3.77743912 0 0 60
-8.56369209 -12.55478382 3.77297831 0 0 58
-8.57794952 -12.55784416 3.77113390 0 0 57
-8.58768272 -12.55855751 3.76947880 0 0 57
-8.60239220 -12.56073380 3.76749945 0 0 57
-8.61122131 -12.56320763 3.76611567 0 0 56
-8.62050438 -12.56480026 3.76459551 0 0 56
-8.64279175 -12.56762695 3.76155663 0 0 56
-8.64664650 -12.56863499 3.76049852 0 0 56
-8.65834808 -12.57027912 3.75934792 0 0 57
-8.67090607 -12.57239628 3.75796318 0 0 59
-8.68579865 -12.57370567 3.75488281 0 0 60
-8.69704819 -12.57623005 3.75386572 0 0 59
-8.70659637 -12.57781315 3.75331259 0 0 60
-8.72619820 -12.58059883 3.74894476 0 0 62
-8.74494553 -12.58291435 3.74480581 0 0 60
-8.75345993 -12.58489418 3.74558020 0 0 58
-8.76136017 -12.58603573 3.74236536 0 0 57
-8.77782249 -12.58692455 3.73988390 0 0 56
-8.77776718 -12.58915806 3.73992252 0 0 57
-8.79835510 -12.59104347 3.73734808 0 0 59
-8.81337738 -12.59371281 3.73321009 0 0 62
-8.82957649 -12.59461308 3.72976446 0 0 62
-8.82444572 -12.59711075 3.73329067 0 0 60
-8.83327484 -12.59958553 3.73190832 0 0 59
-8.84771729 -12.60177612 3.72896242 0 0 60
-8.84558868 -12.60480690 3.73165989 0 0 61
-8.86478806 -12.60624123 3.72739077 0 0 58
-8.88197136 -12.60897636 3.72265434 0 0 55
-8.88928413 -12.60963345 3.72063351 0 0 55
-8.89837837 -12.61209679 3.72021437 0 0 55
-8.91242218 -12.61293411 3.71736479 0 0 55
-8.91370010 -12.61785507 3.71913958 0 0 57
-8.93250275 -12.61793327 3.71496153 0 0 58
-8.92396355 -12.62128258 3.71633005 0 0 57
-8.94369888 -12.62269497 3.71398544 0 0 57
-8.94880295 -12.62552643 3.71259975 0 0 58
-8.94641113 -12.62857246 3.71433353 0 0 58
-8.96561241 -12.63000298 3.71006203 0 0 57
-8.96164894 -12.63346767 3.71119976 0 0 58
-8.98952293 -12.63291264 3.70450163 0 0 56
-8.98218346 -12.63758564 3.70866203 0 0 58
-8.99510765 -12.63796234 3.70508194 0 0 57
-9.02037239 -12.63822556 3.69911528 0 0 57
-8.99574661 -12.64463425 3.70808935 0 0 57
-9.02635574 -12.64462471 3.69960070 0 0 58
-9.03087807 -12.64697647 3.69941092 0 0 58
-9.03558350 -12.64845657 3.69812107 0 0 58
-9.04180717 -12.65174675 3.69746828 0 0 58
-9.04938698 -12.65239525 3.69641256 0 0 58
-9.04412270 -12.65626907 3.69791365 0 0 60
-9.06183434 -12.65898132 3.69510698 0 0 63
-9.05832100 -12.66156578 3.69610786 0 0 59
-9.08246994 -12.66136742 3.68940973 0 0 61
-9.06539536 -12.66532898 3.69522429 0 0 57
-9.07076836 -12.66814995 3.69480276 0 0 58
-9.09531403 -12.66930962 3.68800640 0 0 61
-9.07824135 -12.67327309 3.69382334 0 0 58
-9.10108566 -12.67348576 3.68749046 0 0 60
-9.10619164 -12.67631626 3.68610334 0 0 61
-9.10634995 -12.68077469 3.68714857 0 0 60
-9.11262512 -12.68183422 3.68645573 0 0 60
-9.11212158 -12.68495178 3.68662882 0 0 60
-9.11467361 -12.68636703 3.68593645 0 0 61
-9.11658859 -12.68953514 3.68647623 0 0 62
-9.11778450 -12.69359779 3.68618965 0 0 62
-9.11557579 -12.69576931 3.68682528 0 0 60
-9.11161041 -12.69923306 3.68796539 0 0 59
-9.11241150 -12.70194149 3.68777132 0 0 58
-9.11190414 -12.70505619 3.68794489 0 0 59
-9.10506821 -12.70935059 3.68885183 0 0 60
-9.12836075 -12.70868301 3.68238258 0 0 59
-9.12740517 -12.71267891 3.68269062 0 0 59
-9.12649918 -12.71444321 3.68296385 0 0 58
-9.12384033 -12.71749878 3.68373251 0 0 58
-9.11942482 -12.72184181 3.68500376 0 0 58
-9.11851883 -12.72360802 3.68527365 0 0 57
-9.11168098 -12.72789955 3.68617964 0 0 58
-9.10125542 -12.73117542 3.68910646 0 0 59
-9.09917831 -12.73471069 3.68868208 0 0 59
-9.09063721 -12.73806190 3.69004774 0 0 60
-9.09013176 -12.74117947 3.69022226 0 0 59
-9.06919861 -12.74687195 3.69401312 0 0 59
-9.04566002 -12.75338364 3.69853592 0 0 59
-9.04018021 -12.75503349 3.69903660 0 0 59
-9.01623917 -12.76019096 3.70365620 0 0 58
-8.98655510 -12.76700783 3.70781231 0 0 59
-9.01312447 -12.76686478 3.70148373 0 0 58
-8.98469162 -12.77276993 3.70839262 0 0 58
-8.99774933 -12.77450752 3.70375061 0 0 58
-9.01793861 -12.77503872 3.70127392 0 0 57
-7.69838572 -12.48281860 3.90632772 0 0 60
-7.72633600 -12.48312378 3.90169191 0 0 59
-7.75495768 -12.48477554 3.89792252 0 0 59
-7.77900171 -12.48631382 3.89438581 0 0 58
-7.80950594 -12.48803711 3.88905716 0 0 55
-7.83615828 -12.48875427 3.88478708 0 0 56
-7.86477900 -12.49040413 3.88101768 0 0 55
-7.88967180 -12.49241447 3.87724924 0 0 57
-7.91071177 -12.49341583 3.87453604 0 0 58
-7.93345404 -12.49536133 3.87136602 0 0 60
-7.96230459 -12.49664402 3.86337757 0 0 60
-7.97827005 -12.49790859 3.86415339 0 0 59
-8.00581932 -12.49960327 3.85653257 0 0 58
-8.03313637 -12.50166130 3.85312605 0 0 58
-8.05260658 -12.50308609 3.84981918 0 0 60
-8.07233810 -12.50449657 3.84747362 0 0 60
-8.09265900 -12.50639248 3.84393835 0 0 59
-8.11670303 -12.50792789 3.84039783 0 0 60
-8.13944435 -12.50987244 3.83722544 0 0 60
-8.15787697 -12.51169777 3.83524513 0 0 59
-8.17819786 -12.51358986 3.83170557 0 0 59
-8.19551086 -12.51494789 3.82899427 0 0 59
-8.21610069 -12.51683235 3.82641792 0 0 59
-8.23606682 -12.51787567 3.81985378 0 0 59
-8.25027657 -12.52043343 3.82112932 0 0 56
-8.27873039 -12.52036476 3.81323910 0 0 56
-8.29240417 -12.52294159 3.81258726 0 0 56
-8.31402588 -12.52442551 3.80868149 0 0 57
-8.32658005 -12.52654076 3.80730104 0 0 57
-8.34820366 -12.52802849 3.80339384 0 0 57
-8.36852264 -12.52992153 3.79985476 0 0 58
-8.38107681 -12.53203583 3.79847193 0 0 58
-8.39362907 -12.53415489 3.79708862 0 0 58
-8.41394997 -12.53604889 3.79354620 0 0 59
-8.42807770 -12.53774643 3.79276276 0 0 60
-8.44251633 -12.53993511 3.78982019 0 0 59
-8.46440697 -12.54140854 3.78687859 0 0 57
-8.47068214 -12.54246712 3.78618622 0 0 57
-8.49054909 -12.54524040 3.78278017 0 0 57
-8.50310326 -12.54735756 3.78139925 0 0 59
-8.52464104 -12.54798412 3.77543211 0 0 60
-8.53523064 -12.54916573 3.77354527 0 0 60
-8.54608345 -12.55033779 3.77262306 0 0 60
-8.57438087 -12.55423355 3.76793098 0 0 58
-8.58909035 -12.55641365 3.76595116 0 0 58
-8.59752083 -12.55753517 3.76466417 0 0 58
-8.61223030 -12.55971336 3.76268244 0 0 56
-8.62262917 -12.56176758 3.76189661 0 0 56
-8.63190842 -12.56336021 3.76037836 0 0 56
-8.65523529 -12.56578827 3.75600958 0 0 55
-8.65890694 -12.56766701 3.75605154 0 0 55
-8.66949272 -12.56884956 3.75416517 0 0 56
-8.68159485 -12.57184792 3.75291777 0 0 59
-8.69675255 -12.57314491 3.75080252 0 0 61
-8.70800400 -12.57566929 3.74978447 0 0 60
-8.71728516 -12.57726288 3.74826574 0 0 60
-8.73603630 -12.57957840 3.74412966 0 0 61
-8.75608635 -12.58148193 3.73962593 0 0 62
-8.76486778 -12.58345413 3.74136209 0 0 59
-8.77406693 -12.58418465 3.73778152 0 0 58
-8.79026604 -12.58508301 3.73433733 0 0 57
-8.79087639 -12.58865929 3.73524427 0 0 57
-8.80819130 -12.59002113 3.73253441 0 0 59
-8.82263565 -12.59221077 3.72958946 0 0 64
-8.83810997 -12.59400177 3.72531796 0 0 61
-8.83558273 -12.59567928 3.72810888 0 0 60
-8.84395981 -12.59903526 3.72686005 0 0 59
-8.85997200 -12.60080338 3.72451353 0 0 59
-8.85758018 -12.60385132 3.72624922 0 0 59
-8.87920380 -12.60533237 3.72234297 0 0 56
-8.89638138 -12.60807037 3.71760893 0 0 55
-8.90441704 -12.60783386 3.71641588 0 0 55
-8.91167259 -12.61072922 3.71443558 0 0 55
-8.92683411 -12.61202621 3.71232080 0 0 55
-8.92726326 -12.61647606 3.71432543 0 0 57
-8.94664764 -12.61703682 3.70895433 0 0 57
-8.93968010 -12.61996746 3.71092033 0 0 56
-8.95941544 -12.62137985 3.70857477 0 0 56
-8.96366882 -12.62373924 3.70742083 0 0 57
-8.96172905 -12.62590122 3.70901966 0 0 57
-8.98393250 -12.62786674 3.70391941 0 0 56
-8.97893524 -12.63173103 3.70638609 0 0 57
-9.00680351 -12.63117599 3.69968557 0 0 56
-8.99835014 -12.63538742 3.70311975 0 0 57
-9.01212502 -12.63623619 3.69930601 0 0 57
-9.03608704 -12.63691044 3.69370508 0 0 57
-9.01361465 -12.64337921 3.70208311 0 0 57
-9.04252434 -12.64242744 3.69405603 0 0 58
-9.04789734 -12.64525223 3.69363546 0 0 58
-9.05130005 -12.64713860 3.69271135 0 0 59
-9.05909348 -12.65001011 3.69265652 0 0 59
-9.06856155 -12.65073299 3.69003963 0 0 59
-9.06459618 -12.65419769 3.69117451 0 0 59
-9.07885361 -12.65725803 3.68933010 0 0 63
-9.07403946 -12.66024780 3.69069862 0 0 62
-9.09863853 -12.65917397 3.68386364 0 0 63
-9.08568764 -12.66413021 3.68958426 0 0 59
-9.08908844 -12.66601562 3.68866062 0 0 60
-9.11103058 -12.66799355 3.68259716 0 0 61
-9.09638023 -12.67200661 3.68878031 0 0 60
-9.11810493 -12.67175865 3.68171406 0 0 62
-9.12563133 -12.67464256 3.68069696 0 0 63
-9.12754631 -12.67781258 3.68123531 0 0 61
-9.13310242 -12.67976379 3.67971659 0 0 61
-9.13044167 -12.68281555 3.68048525 0 0 61
-9.13195992 -12.68463326 3.68112516 0 0 61
-9.13275719 -12.68733788 3.68093061 0 0 64
-9.13506889 -12.69185925 3.68137836 0 0 65
-9.13546944 -12.69321251 3.68128157 0 0 63
-9.13496208 -12.69633102 3.68145657 0 0 60
-9.13530731 -12.69992256 3.68139839 0 0 59
-9.13525581 -12.70215225 3.68143797 0 0 58
-9.12711334 -12.70685673 3.68270826 0 0 59
-9.15256500 -12.70625114 3.67564440 0 0 58
-9.15232277 -12.70935822 3.67678165 0 0 58
-9.15442467 -12.71165466 3.67622566 0 0 57
-9.15019226 -12.71513081 3.67639685 0 0 57
-9.14753151 -12.71818542 3.67716932 0 0 57
-9.14878082 -12.72000980 3.67684126 0 0 57
-9.14221382 -12.72429276 3.67870903 0 0 58
-9.13191795 -12.72893238 3.68057823 0 0 59
-9.13056183 -12.73157883 3.68098259 0 0 59
-9.12202263 -12.73493004 3.68234682 0 0 59
-9.12281990 -12.73763466 3.68215799 0 0 60
-9.10691261 -12.74255943 3.68558359 0 0 60
-9.09185791 -12.74795628 3.68878078 0 0 60
-9.08807945 -12.75055027 3.68882132 0 0 60
-9.06805038 -12.75448036 3.69233990 0 0 59
-9.03706169 -12.76170826 3.69686174 0 0 59
-9.06493378 -12.76115322 3.69016361 0 0 58
-9.01391792 -12.76957321 3.70128918 0 0 58
-9.02828026 -12.77090073 3.69628286 0 0 58
-9.02431679 -12.77436256 3.69742107 0 0 58
-9.04051399 -12.77526093 3.69397736 0 0 58
-6.76744890 -12.42926025 4.04770088 0 0 72
-7.72553492 -12.48315525 3.89880133 0 0 59
-7.75519133 -12.48440647 3.89370394 0 0 59
-7.78035307 -12.48640633 3.89089823 0 0 58
-7.81131411 -12.48724651 3.88543415 0 0 54
-7.83836031 -12.48932076 3.88106823 0 0 55
-7.86828470 -12.49056053 3.87693310 0 0 56
-7.89147615 -12.49162292 3.87362623 0 0 58
-7.91421938 -12.49357033 3.87045336 0 0 59
-7.93695879 -12.49551582 3.86728144 0 0 60
-7.96496248 -12.49632645 3.85952234 0 0 61
-7.98177385 -12.49806404 3.86007023 0 0 59
-8.00977516 -12.49887657 3.85231066 0 0 58
-8.03794479 -12.50140953 3.84868002 0 0 58
-8.05682945 -12.50234985 3.84656334 0 0 59
-8.07714844 -12.50424385 3.84302664 0 0 59
-8.09818840 -12.50524712 3.84031534 0 0 59
-8.12308502 -12.50725365 3.83654308 0 0 60
-8.14425659 -12.50962067 3.83277512 0 0 60
-8.16399002 -12.51103020 3.83042860 0 0 60
-8.18561172 -12.51251602 3.82652378 0 0 60
-8.20189095 -12.51427650 3.82514286 0 0 60
-8.22117233 -12.51656914 3.82293272 0 0 59
-8.24244881 -12.51720238 3.81600094 0 0 59
-8.25854492 -12.51983452 3.81571627 0 0 57
-8.28465843 -12.52057076 3.80952024 0 0 57
-8.30067062 -12.52234077 3.80717325 0 0 56
-8.32210732 -12.52469635 3.80436897 0 0 57
-8.33484650 -12.52594376 3.80188560 0 0 56
-8.35673523 -12.52741528 3.79894495 0 0 56
-8.37490273 -12.52924728 3.79600286 0 0 58
-8.38961029 -12.53142738 3.79402256 0 0 58
-8.40216255 -12.53354073 3.79263973 0 0 58
-8.42163086 -12.53496552 3.78932905 0 0 58
-8.43746185 -12.53760529 3.78808165 0 0 59
-8.45280457 -12.53803253 3.78486872 0 0 58
-8.47424507 -12.54038620 3.78206205 0 0 57
-8.48222542 -12.54238796 3.78090811 0 0 57
-8.50038719 -12.54422188 3.77796793 0 0 58
-8.51424408 -12.54592896 3.77621889 0 0 59
-8.53318024 -12.54737377 3.77098083 0 0 60
-8.54591751 -12.54861546 3.76850176 0 0 60
-8.55677223 -12.54978943 3.76757908 0 0 60
-8.58421707 -12.55321598 3.76311827 0 0 59
-8.59892654 -12.55539322 3.76113653 0 0 59
-8.60735703 -12.55651283 3.75984812 0 0 58
-8.62161064 -12.55957603 3.75800228 0 0 56
-8.63331795 -12.56121826 3.75685167 0 0 56
-8.64259911 -12.56281281 3.75533152 0 0 56
-8.66677475 -12.56571198 3.75073576 0 0 56
-8.67004395 -12.56623650 3.75086880 0 0 55
-8.68175125 -12.56788063 3.74971628 0 0 56
-8.69385147 -12.57088089 3.74846888 0 0 58
-8.70659065 -12.57212448 3.74598598 0 0 61
-8.71914482 -12.57423973 3.74460506 0 0 61
-8.72869301 -12.57582378 3.74404907 0 0 60
-8.74829483 -12.57860851 3.73968077 0 0 60
-8.76704407 -12.58092308 3.73554373 0 0 61
-8.77555466 -12.58290482 3.73631716 0 0 60
-8.78606033 -12.58322716 3.73237038 0 0 59
-8.80207253 -12.58499622 3.73002291 0 0 59
-8.80574036 -12.58687305 3.73006439 0 0 58
-8.82018280 -12.58906460 3.72712088 0 0 57
-8.83201790 -12.59207344 3.72490931 0 0 61
-8.84794617 -12.59297752 3.72050238 0 0 58
-8.84438515 -12.59506035 3.72462511 0 0 59
-8.85536957 -12.59759426 3.72264528 0 0 57
-8.87196541 -12.59984684 3.71910334 0 0 57
-8.87114334 -12.60247231 3.72143507 0 0 57
-8.89537239 -12.60313702 3.71679688 0 0 55
-8.90994263 -12.60668945 3.71279621 0 0 55
-8.91725731 -12.60735035 3.71077299 0 0 54
-8.92653847 -12.60894203 3.70925474 0 0 54
-8.93928146 -12.61018753 3.70677328 0 0 55
-8.94082260 -12.61509895 3.70951271 0 0 56
-8.96105957 -12.61613083 3.70391035 0 0 56
-8.95539474 -12.61865044 3.70550919 0 0 56
-8.97513390 -12.62006187 3.70316267 0 0 56
-8.97808075 -12.62283325 3.70237589 0 0 56
-8.97959709 -12.62464714 3.70301294 0 0 56
-9.00122452 -12.62613106 3.69910574 0 0 56
-8.99595451 -12.63000488 3.70061111 0 0 56
-9.02167130 -12.62939072 3.69450903 0 0 56
-9.01491928 -12.63454247 3.69747496 0 0 57
-9.02784157 -12.63491917 3.69389486 0 0 57
-9.05180359 -12.63559151 3.68829346 0 0 58
-9.02978516 -12.64118290 3.69653940 0 0 58
-9.06066132 -12.64116669 3.68901157 0 0 59
-9.06621933 -12.64311409 3.68749142 0 0 59
-9.06917000 -12.64588451 3.68670416 0 0 60
-9.07741547 -12.64787483 3.68651390 0 0 60
-9.08558083 -12.64900589 3.68426132 0 0 61
-9.08534050 -12.65211201 3.68539906 0 0 60
-9.09717560 -12.65512085 3.68318605 0 0 63
-9.09020615 -12.65805054 3.68515158 0 0 63
-9.11435509 -12.65785599 3.67845106 0 0 64
-9.10270691 -12.66240311 3.68380690 0 0 61
-9.10611153 -12.66429138 3.68288469 0 0 61
-9.13065720 -12.66544819 3.67608929 0 0 61
-9.11209488 -12.67068863 3.68337011 0 0 61
-9.13512421 -12.67003155 3.67593813 0 0 62
-9.14134407 -12.67332745 3.67528439 0 0 64
-9.14541626 -12.67655849 3.67522717 0 0 63
-9.15039062 -12.67802811 3.67490244 0 0 63
-9.14746475 -12.68109131 3.67471170 0 0 61
-9.14897919 -12.68290329 3.67534685 0 0 60
-9.14762115 -12.68555069 3.67575169 0 0 63
-9.14993668 -12.69007111 3.67619753 0 0 64
-9.15118599 -12.69189739 3.67586994 0 0 63
-9.15283203 -12.69507885 3.67544889 0 0 60
-9.15708733 -12.69743538 3.67429495 0 0 59
-9.15860367 -12.69925117 3.67493105 0 0 58
-9.15131378 -12.70442772 3.67596960 0 0 58
-9.17748451 -12.70293140 3.66973734 0 0 58
-9.17782974 -12.70652008 3.66967869 0 0 58
-9.17992973 -12.70881557 3.66912222 0 0 58
-9.17596626 -12.71227932 3.67025805 0 0 57
-9.17545891 -12.71539783 3.67043066 0 0 57
-9.17670822 -12.71722221 3.67010403 0 0 57
-9.17144203 -12.72109604 3.67160702 0 0 58
-9.16159821 -12.72485542 3.67334175 0 0 58
-9.16109467 -12.72797012 3.67351198 0 0 59
-9.15255356 -12.73131943 3.67487860 0 0 59
-9.15420151 -12.73450184 3.67445707 0 0 60
-9.13959885 -12.73901558 3.67751837 0 0 61
-9.12669754 -12.74447250 3.68011665 0 0 61
-9.12422180 -12.74665928 3.67979145 0 0 61
-9.11137390 -12.74988270 3.68234968 0 0 60
-9.08783722 -12.75639343 3.68687439 0 0 59
-9.11544037 -12.75585175 3.67921114 0 0 58
-9.06442833 -12.76426983 3.69034052 0 0 58
-9.07878685 -12.76559830 3.68533230 0 0 59
-9.06333351 -12.76964188 3.68862391 0 0 59
-9.04558754 -12.77499962 3.69049025 0 0 59
-9.05644035 -12.77616882 3.68956661 0 0 57
-6.77587557 -12.43312073 4.04332876 0 0 76
-7.75523996 -12.48491096 3.89058113 0 0 59
-7.77973509 -12.48556614 3.88690996 0 0 59
-7.81136274 -12.48774910 3.88231230 0 0 54
-7.84016466 -12.48853111 3.87744665 0 0 55
-7.87035513 -12.48976421 3.87427330 0 0 56
-7.89283037 -12.49171829 3.87013769 0 0 58
-7.91687250 -12.49325371 3.86660242 0 0 60
-7.93961382 -12.49520111 3.86342955 0 0 61
-7.96761465 -12.49601173 3.85567188 0 0 61
-7.98554850 -12.49821091 3.85695028 0 0 59
-8.01355171 -12.49902344 3.84919071 0 0 58
-8.04105568 -12.50021267 3.84468794 0 0 58
-8.06033707 -12.50250340 3.84247828 0 0 59
-8.08110809 -12.50351906 3.83880758 0 0 58
-8.10299873 -12.50499249 3.83586407 0 0 59
-8.12874603 -12.50747395 3.83186150 0 0 60
-8.15063667 -12.50894547 3.82892179 0 0 60
-8.16906929 -12.51076794 3.82694387 0 0 60
-8.19199371 -12.51184273 3.82267189 0 0 61
-8.20827293 -12.51360512 3.82129049 0 0 61
-8.22728920 -12.51590538 3.81811476 0 0 60
-8.24856186 -12.51653862 3.81118345 0 0 60
-8.26622772 -12.51874924 3.81149912 0 0 58
-8.28992081 -12.51943779 3.80493641 0 0 58
-8.30835342 -12.52125740 3.80295753 0 0 56
-8.32979012 -12.52361298 3.80014753 0 0 57
-8.34338188 -12.52533150 3.79743719 0 0 56
-8.36526871 -12.52680588 3.79449511 0 0 56
-8.38213158 -12.52904510 3.79191923 0 0 57
-8.39814377 -12.53081608 3.78957129 0 0 57
-8.41114998 -12.53205013 3.78805494 0 0 58
-8.43016815 -12.53435326 3.78488302 0 0 58
-8.44729805 -12.53658295 3.78326845 0 0 58
-8.46304131 -12.53836346 3.77995729 0 0 59
-8.48362923 -12.54024696 3.77738190 0 0 58
-8.49120903 -12.54089832 3.77632475 0 0 58
-8.50892067 -12.54361057 3.77351904 0 0 58
-8.52304649 -12.54530716 3.77273321 0 0 59
-8.54216766 -12.54588127 3.76639748 0 0 60
-8.55445290 -12.54800415 3.76405048 0 0 60
-8.56530762 -12.54917908 3.76312780 0 0 60
-8.59405708 -12.55219460 3.75830221 0 0 60
-8.60746002 -12.55478096 3.75669003 0 0 59
-8.61589241 -12.55590439 3.75539827 0 0 58
-8.63145065 -12.55855370 3.75318861 0 0 56
-8.64400291 -12.56066895 3.75180340 0 0 56
-8.65328789 -12.56226158 3.75028563 0 0 56
-8.67818069 -12.56427002 3.74651766 0 0 56
-8.68230629 -12.56526947 3.74642134 0 0 56
-8.69374275 -12.56692123 3.74430609 0 0 56
-8.70499229 -12.56944942 3.74328756 0 0 58
-8.71858215 -12.57116508 3.74057531 0 0 60
-8.72983360 -12.57369328 3.73955870 0 0 61
-8.73983574 -12.57439327 3.73886681 0 0 60
-8.76140404 -12.57811356 3.73500109 0 0 61
-8.77903366 -12.57996559 3.73013163 0 0 61
-8.78754807 -12.58194828 3.73090601 0 0 60
-8.79674721 -12.58267975 3.72732496 0 0 60
-8.81236076 -12.58309174 3.72507334 0 0 61
-8.81773376 -12.58591747 3.72465086 0 0 60
-8.83459473 -12.58815670 3.72207642 0 0 57
-8.84315681 -12.59064102 3.71972847 0 0 57
-8.86150932 -12.59160042 3.71568632 0 0 55
-8.85768127 -12.59369087 3.71884632 0 0 56
-8.86866379 -12.59622955 3.71686792 0 0 56
-8.88552666 -12.59846783 3.71428919 0 0 56
-8.88555717 -12.60156631 3.71638823 0 0 56
-8.91063499 -12.60270119 3.71152210 0 0 55
-8.92323685 -12.60532188 3.70701742 0 0 55
-8.92997169 -12.60549927 3.70619249 0 0 54
-8.94095039 -12.60803604 3.70421028 0 0 54
-8.95238686 -12.60968971 3.70209408 0 0 55
-8.95496941 -12.61420250 3.70350552 0 0 56
-8.97592735 -12.61434555 3.69872999 0 0 56
-8.96940994 -12.61639023 3.70055962 0 0 56
-8.98999977 -12.61827660 3.69798422 0 0 56
-8.99294853 -12.62104416 3.69719553 0 0 56
-8.99616623 -12.62380219 3.69737196 0 0 56
-9.01451302 -12.62476349 3.69333029 0 0 56
-9.01167107 -12.62869072 3.69519758 0 0 56
-9.03712082 -12.62808418 3.68813467 0 0 56
-9.03108406 -12.63234901 3.69193029 0 0 57
-9.04355812 -12.63360310 3.68848419 0 0 57
-9.06797218 -12.63339710 3.68274927 0 0 58
-9.04550171 -12.63986778 3.69112396 0 0 58
-9.07768250 -12.63943768 3.68323374 0 0 61
-9.08408737 -12.64186192 3.68148470 0 0 62
-9.08776093 -12.64373684 3.68152428 0 0 63
-9.09443665 -12.64615059 3.68073606 0 0 63
-9.10129547 -12.64768982 3.67885065 0 0 63
-9.10151100 -12.64991760 3.67985296 0 0 62
-9.11289215 -12.65380669 3.67777681 0 0 64
-9.10592270 -12.65673542 3.67974138 0 0 64
-9.12921906 -12.65606880 3.67327309 0 0 64
-9.11842537 -12.66108704 3.67839622 0 0 64
-9.12555122 -12.66261673 3.67747355 0 0 62
-9.14794350 -12.66371155 3.67127609 0 0 61
-9.12911415 -12.66896439 3.67759323 0 0 61
-9.15129280 -12.66783714 3.67039251 0 0 60
-9.15536118 -12.67106628 3.67033768 0 0 62
-9.16028214 -12.67476940 3.67004871 0 0 64
-9.16525459 -12.67623901 3.66972399 0 0 62
-9.16448212 -12.67936516 3.66893244 0 0 59
-9.16730118 -12.68076897 3.66920662 0 0 58
-9.16549110 -12.68429756 3.66974640 0 0 59
-9.16825867 -12.68793678 3.67005396 0 0 61
-9.16820526 -12.69017220 3.67009211 0 0 61
-9.17272568 -12.69252110 3.66990423 0 0 59
-9.17868423 -12.69582462 3.66828918 0 0 58
-9.18019867 -12.69764137 3.66892385 0 0 58
-9.17681885 -12.70158672 3.66886663 0 0 58
-9.19926453 -12.70044708 3.66262960 0 0 58
-9.20072746 -12.70449829 3.66330385 0 0 58
-9.20197678 -12.70632362 3.66297817 0 0 58
-9.20016670 -12.70984745 3.66351795 0 0 58
-9.19965935 -12.71296692 3.66369343 0 0 58
-9.20005989 -12.71431923 3.66359520 0 0 58
-9.19649315 -12.71913719 3.66463757 0 0 58
-9.18925667 -12.72207451 3.66563702 0 0 58
-9.18790054 -12.72471905 3.66604233 0 0 58
-9.18178368 -12.72812271 3.66777802 0 0 59
-9.18388557 -12.73042011 3.66722155 0 0 60
-9.17012978 -12.73540783 3.67004967 0 0 61
-9.15853500 -12.74045944 3.67228413 0 0 61
-9.15690994 -12.74311352 3.67172527 0 0 61
-9.14752007 -12.74599266 3.67332506 0 0 61
-9.13116074 -12.75179768 3.67688227 0 0 60
-9.15876579 -12.75125599 3.66922188 0 0 59
-9.11493301 -12.75896645 3.67938757 0 0 59
-9.12844276 -12.75982475 3.67461205 0 0 59
-9.11226845 -12.76476002 3.67707205 0 0 59
-9.08258438 -12.77157784 3.68122959 0 0 59
-9.06367302 -12.77597237 3.68548536 0 0 59
-9.07080269 -12.77750015 3.68455935 0 0 58
-6.78018045 -12.43598557 4.03905249 0 0 75
-7.75444078 -12.48494339 3.88769197 0 0 60
-7.77893686 -12.48559856 3.88401604 0 0 59
-7.81029367 -12.48779297 3.87845755 0 0 54
-7.84152079 -12.48862553 3.87395716 0 0 54
-7.87170839 -12.48985863 3.87078619 0 0 57
-7.89418459 -12.49181366 3.86665297 0 0 58
-7.91822672 -12.49334908 3.86311388 0 0 61
-7.94142008 -12.49441338 3.85980558 0 0 61
-7.97027254 -12.49569702 3.85181761 0 0 62
-7.98865557 -12.49701500 3.85296106 0 0 60
-8.01705933 -12.49917889 3.84510469 0 0 59
-8.04437447 -12.50123787 3.84170103 0 0 58
-8.06344223 -12.50130844 3.83849144 0 0 58
-8.08618546 -12.50325584 3.83532047 0 0 58
-8.10807800 -12.50472641 3.83237600 0 0 59
-8.13297081 -12.50673676 3.82860804 0 0 61
-8.15571022 -12.50868225 3.82543659 0 0 60
-8.17432976 -12.50963211 3.82235813 0 0 60
-8.19707108 -12.51157951 3.81918526 0 0 61
-8.21308327 -12.51334953 3.81683922 0 0 62
-8.23366928 -12.51523304 3.81426096 0 0 60
-8.25363922 -12.51627731 3.80769920 0 0 60
-8.27260590 -12.51807594 3.80764627 0 0 58
-8.29714966 -12.51923370 3.80085230 0 0 58
-8.31558609 -12.52105522 3.79887438 0 0 57
-8.33702278 -12.52341270 3.79606533 0 0 57
-8.35106468 -12.52424622 3.79321909 0 0 57
-8.37250328 -12.52659988 3.79041243 0 0 56
-8.38981819 -12.52796364 3.78770065 0 0 56
-8.40713120 -12.52932262 3.78498983 0 0 56
-8.41923332 -12.53232002 3.78373861 0 0 57
-8.43785095 -12.53327084 3.78066206 0 0 58
-8.45713234 -12.53556252 3.77845240 0 0 58
-8.47072601 -12.53728104 3.77573824 0 0 59
-8.49216270 -12.53963852 3.77293301 0 0 60
-8.49974251 -12.54028606 3.77187586 0 0 59
-8.51745605 -12.54299831 3.76906872 0 0 59
-8.53157997 -12.54469490 3.76828194 0 0 60
-8.55154991 -12.54574013 3.76171923 0 0 60
-8.56370544 -12.54650307 3.76042986 0 0 61
-8.57384109 -12.54856873 3.75868177 0 0 60
-8.60259056 -12.55158043 3.75385427 0 0 60
-8.61756516 -12.55375099 3.75283670 0 0 59
-8.62573242 -12.55488300 3.75058603 0 0 57
-8.64285851 -12.55711269 3.74897242 0 0 56
-8.65456390 -12.55875492 3.74781752 0 0 56
-8.66469383 -12.56082153 3.74607134 0 0 56
-8.68887138 -12.56372261 3.74147081 0 0 56
-8.69429779 -12.56431007 3.74101114 0 0 56
-8.70599747 -12.56595230 3.73985815 0 0 56
-8.71725082 -12.56848145 3.73884344 0 0 57
-8.73084259 -12.57019711 3.73612642 0 0 59
-8.74209404 -12.57272434 3.73510885 0 0 61
-8.75182343 -12.57343483 3.73345709 0 0 60
-8.77254486 -12.57668304 3.72982264 0 0 62
-8.79044342 -12.57852459 3.72591448 0 0 62
-8.79980850 -12.58097649 3.72645760 0 0 61
-8.80900764 -12.58170795 3.72287655 0 0 62
-8.82304955 -12.58254433 3.72002888 0 0 61
-8.82626915 -12.58530426 3.72020340 0 0 61
-8.84600449 -12.58671284 3.71785975 0 0 57
-8.85757065 -12.58973503 3.71468592 0 0 55
-8.87677193 -12.59116650 3.71041203 0 0 54
-8.87209511 -12.59278488 3.71380329 0 0 55
-8.88222694 -12.59484863 3.71205282 0 0 55
-8.89993858 -12.59756279 3.70924473 0 0 55
-8.90015221 -12.59978867 3.71024656 0 0 55
-8.92308044 -12.60086155 3.70597601 0 0 55
-8.93549728 -12.60435390 3.70256710 0 0 54
-8.94437790 -12.60459328 3.70114660 0 0 54
-8.95451164 -12.60665512 3.69939947 0 0 55
-8.96640396 -12.60743237 3.69714499 0 0 55
-8.97068596 -12.61288452 3.69809294 0 0 56
-8.99078941 -12.61255550 3.69355059 0 0 56
-8.98597717 -12.61554909 3.69491816 0 0 56
-9.00329208 -12.61690617 3.69220924 0 0 56
-9.00866318 -12.61973000 3.69178581 0 0 56
-9.00972748 -12.62242317 3.69255590 0 0 56
-9.02892685 -12.62385750 3.68828392 0 0 56
-9.02653694 -12.62690163 3.69002056 0 0 56
-9.05198479 -12.62629604 3.68295431 0 0 56
-9.04765511 -12.63150406 3.68628883 0 0 57
-9.05927467 -12.63228703 3.68307114 0 0 57
-9.08480644 -12.63254356 3.67807055 0 0 59
-9.06251907 -12.63814163 3.68534899 0 0 59
-9.09012604 -12.63759804 3.67768574 0 0 63
-9.09679985 -12.64001083 3.67690039 0 0 65
-9.10262680 -12.64195251 3.67634535 0 0 67
-9.10885048 -12.64524269 3.67569160 0 0 66
-9.11701202 -12.64637661 3.67344141 0 0 65
-9.11722755 -12.64859772 3.67444229 0 0 64
-9.12906075 -12.65160751 3.67222977 0 0 64
-9.12163734 -12.65542030 3.67433167 0 0 64
-9.14578629 -12.65522385 3.66763067 0 0 63
-9.13329124 -12.65929985 3.67321587 0 0 65
-9.14126968 -12.66129875 3.67206240 0 0 64
-9.16366005 -12.66239738 3.66586494 0 0 61
-9.14658356 -12.66635799 3.67168093 0 0 60
-9.17073250 -12.66616249 3.66497993 0 0 59
-9.17323303 -12.66981316 3.66432714 0 0 60
-9.17469406 -12.67386341 3.66500521 0 0 61
-9.18227577 -12.67451096 3.66394615 0 0 59
-9.18437386 -12.67680931 3.66338682 0 0 58
-9.18889618 -12.67915916 3.66319847 0 0 57
-9.18884277 -12.68139362 3.66323566 0 0 57
-9.19115639 -12.68591499 3.66368103 0 0 58
-9.19240379 -12.68774223 3.66335535 0 0 59
-9.19477272 -12.69002819 3.66376066 0 0 58
-9.19942474 -12.69374180 3.66251230 0 0 58
-9.20067215 -12.69556618 3.66218376 0 0 57
-9.19841385 -12.69997406 3.66285944 0 0 58
-9.22085762 -12.69883347 3.65662146 0 0 57
-9.22120285 -12.70242405 3.65656519 0 0 58
-9.22200012 -12.70513248 3.65637302 0 0 58
-9.22136497 -12.70688438 3.65760851 0 0 58
-9.22058868 -12.71001053 3.65681839 0 0 58
-9.22165298 -12.71270943 3.65759087 0 0 57
-9.21899414 -12.71576214 3.65836287 0 0 58
-9.21372604 -12.71963501 3.65986300 0 0 58
-9.21452332 -12.72234154 3.65967226 0 0 58
-9.20899010 -12.72622681 3.66021109 0 0 59
-9.21023750 -12.72805119 3.65988493 0 0 60
-9.19909286 -12.73221970 3.66198254 0 0 61
-9.19076729 -12.73779392 3.66435099 0 0 61
-9.19116592 -12.73914719 3.66425562 0 0 61
-9.18177605 -12.74202633 3.66585207 0 0 62
-9.17017937 -12.74707603 3.66808653 0 0 61
-9.19432640 -12.74687862 3.66138887 0 0 61
-9.16086578 -12.75355148 3.66866446 0 0 59
-9.17307091 -12.75481892 3.66425657 0 0 59
-9.15931892 -12.75980663 3.66708422 0 0 59
-9.13165665 -12.76532459 3.67170429 0 0 59
-9.10223961 -12.77213097 3.67682219 0 0 59
-9.09760666 -12.77425003 3.67709255 0 0 59
-9.09234238 -12.77812576 3.67859411 0 0 58
-6.78363180 -12.43837738 4.03500605 0 0 74
-7.77741575 -12.48651886 3.88029909 0 0 59
-7.80864000 -12.48735142 3.87579679 0 0 53
-7.84156656 -12.48912811 3.87083721 0 0 54
-7.87149096 -12.49036980 3.86670113 0 0 56
-7.89553213 -12.49190521 3.86316347 0 0 58
-7.92003012 -12.49256039 3.85949373 0 0 60
-7.94362307 -12.49497795 3.85608530 0 0 62
-7.97247744 -12.49626160 3.84809780 0 0 62
-7.99216413 -12.49717045 3.84887409 0 0 60
-8.02101898 -12.49845314 3.84088659 0 0 59
-8.04748535 -12.50004196 3.83771610 0 0 58
-8.06721878 -12.50145435 3.83537149 0 0 58
-8.08995819 -12.50340080 3.83219767 0 0 58
-8.11288643 -12.50447464 3.82792854 0 0 58
-8.13778114 -12.50648403 3.82415771 0 0 60
-8.16052055 -12.50843239 3.82098627 0 0 61
-8.17940903 -12.50936890 3.81887054 0 0 61
-8.20272827 -12.51179886 3.81450510 0 0 61
-8.21815681 -12.51308441 3.81335354 0 0 61
-8.23932838 -12.51545143 3.80958033 0 0 61
-8.25975037 -12.51561356 3.80288267 0 0 59
-8.27983475 -12.51787567 3.80356359 0 0 59
-8.30353355 -12.51856136 3.79699898 0 0 59
-8.32281685 -12.52085304 3.79478979 0 0 58
-8.34443855 -12.52233696 3.79088259 0 0 58
-8.35829544 -12.52404594 3.78913307 0 0 57
-8.37888145 -12.52592850 3.78656006 0 0 57
-8.39834976 -12.52735138 3.78325319 0 0 56
-8.41566467 -12.52871132 3.78053856 0 0 56
-8.42777061 -12.53170967 3.77929163 0 0 57
-8.44723701 -12.53313065 3.77598286 0 0 57
-8.46566772 -12.53495312 3.77400446 0 0 59
-8.47925568 -12.53667068 3.77129078 0 0 60
-8.50069809 -12.53902912 3.76848459 0 0 60
-8.50697517 -12.54008484 3.76779127 0 0 60
-8.52598953 -12.54238701 3.76462126 0 0 60
-8.54011536 -12.54408455 3.76383305 0 0 60
-8.56053734 -12.54424667 3.75713396 0 0 60
-8.57308960 -12.54636383 3.75575018 0 0 61
-8.58237267 -12.54795742 3.75423241 0 0 60
-8.61269569 -12.55055046 3.75000048 0 0 60
-8.62740326 -12.55273056 3.74802065 0 0 58
-8.63713646 -12.55344200 3.74636745 0 0 57
-8.65485191 -12.55615520 3.74355888 0 0 56
-8.66525078 -12.55820847 3.74277020 0 0 56
-8.67538071 -12.56027603 3.74102449 0 0 56
-8.70027733 -12.56228065 3.73725510 0 0 57
-8.70413208 -12.56328964 3.73619509 0 0 57
-8.71668816 -12.56540298 3.73481035 0 0 58
-8.72924232 -12.56751823 3.73342896 0 0 58
-8.74413490 -12.56882858 3.73035002 0 0 60
-8.75435257 -12.57175446 3.73066235 0 0 61
-8.76363182 -12.57334709 3.72914219 0 0 61
-8.78264999 -12.57565117 3.72596979 0 0 62
-8.80113029 -12.57797527 3.72086954 0 0 62
-8.81094742 -12.57954788 3.72127581 0 0 63
-8.81884384 -12.58068848 3.71806097 0 0 63
-8.83400536 -12.58198547 3.71594620 0 0 61
-8.83610535 -12.58428383 3.71538830 0 0 60
-8.85584068 -12.58569336 3.71304464 0 0 57
-8.87027931 -12.58788490 3.71010065 0 0 54
-8.88791275 -12.58973598 3.70522928 0 0 54
-8.88480759 -12.59093285 3.70921755 0 0 54
-8.89664078 -12.59394264 3.70700884 0 0 54
-8.91265106 -12.59571266 3.70466232 0 0 55
-8.91241074 -12.59881878 3.70579910 0 0 55
-8.93533707 -12.59989357 3.70152903 0 0 54
-8.94905853 -12.60297394 3.69775677 0 0 54
-8.96028328 -12.60240555 3.69463682 0 0 55
-8.96937752 -12.60487175 3.69421625 0 0 55
-8.98211670 -12.60611343 3.69173479 0 0 55
-8.98555183 -12.61109829 3.69291162 0 0 57
-9.00304985 -12.61158657 3.68910217 0 0 56
-8.99954033 -12.61417007 3.69010115 0 0 56
-9.01685333 -12.61553001 3.68739367 0 0 56
-9.02195930 -12.61836243 3.68600655 0 0 55
-9.02217293 -12.62058640 3.68701172 0 0 56
-9.04464531 -12.62254143 3.68287516 0 0 55
-9.04140091 -12.62511444 3.68483925 0 0 55
-9.06725121 -12.62586021 3.67767763 0 0 56
-9.06251717 -12.62971497 3.68110800 0 0 57
-9.07544136 -12.63008881 3.67752886 0 0 58
-9.09724808 -12.63070297 3.67252541 0 0 61
-9.07738686 -12.63635445 3.68016815 0 0 60
-9.10323334 -12.63710117 3.67301035 0 0 63
-9.10906029 -12.63904381 3.67245054 0 0 66
-9.11461639 -12.64099216 3.67093325 0 0 68
-9.12240791 -12.64386654 3.67087460 0 0 68
-9.13057327 -12.64499760 3.66862440 0 0 66
-9.13163948 -12.64769363 3.66939831 0 0 65
-9.14477730 -12.65029240 3.66682053 0 0 64
-9.13780785 -12.65321922 3.66878414 0 0 63
-9.16176987 -12.65389633 3.66318464 0 0 63
-9.14815521 -12.65750980 3.66803598 0 0 64
-9.15482903 -12.65992355 3.66724873 0 0 63
-9.17937469 -12.66107750 3.66045237 0 0 59
-9.16360664 -12.66463280 3.66590405 0 0 59
-9.18775177 -12.66443539 3.65920591 0 0 58
-9.19155502 -12.66767693 3.65818548 0 0 58
-9.19301605 -12.67172813 3.65886402 0 0 58
-9.20144653 -12.67284966 3.65757322 0 0 58
-9.20400238 -12.67426682 3.65688086 0 0 57
-9.20721817 -12.67702103 3.65705538 0 0 56
-9.20958519 -12.67931175 3.65746164 0 0 56
-9.21189690 -12.68383408 3.65790796 0 0 57
-9.21229935 -12.68518543 3.65780926 0 0 58
-9.21439934 -12.68748283 3.65725422 0 0 58
-9.21775055 -12.69160652 3.65636969 0 0 58
-9.22141647 -12.69348526 3.65640926 0 0 57
-9.21830559 -12.69742012 3.65731668 0 0 57
-9.24205399 -12.69587231 3.65071344 0 0 57
-9.24194717 -12.70034027 3.65078974 0 0 57
-9.24189186 -12.70257759 3.65082979 0 0 57
-9.24138832 -12.70569229 3.65100241 0 0 57
-9.24133301 -12.70792866 3.65104198 0 0 57
-9.24473572 -12.70981693 3.65011930 0 0 57
-9.24189377 -12.71374226 3.65198803 0 0 57
-9.23550606 -12.71715450 3.65275717 0 0 58
-9.23872185 -12.71991253 3.65293312 0 0 57
-9.23449326 -12.72338867 3.65310574 0 0 58
-9.23489189 -12.72474003 3.65301180 0 0 59
-9.22441101 -12.73025131 3.65597725 0 0 61
-9.21757507 -12.73454475 3.65688229 0 0 61
-9.21882629 -12.73637009 3.65655327 0 0 61
-9.21073723 -12.73883724 3.65778494 0 0 62
-9.20201302 -12.74306011 3.66025257 0 0 61
-9.22198486 -12.74410248 3.65368700 0 0 61
-9.19943047 -12.74971390 3.66000366 0 0 61
-9.21078300 -12.75050735 3.65582561 0 0 60
-9.20291138 -12.75519753 3.65805960 0 0 60
-9.17928886 -12.76085091 3.66052198 0 0 59
-9.15234375 -12.76547432 3.66596699 0 0 60
-9.14595985 -12.76888657 3.66674042 0 0 60
-9.12475967 -12.77458954 3.66956663 0 0 59
-9.11015892 -12.77910709 3.67262602 0 0 58
-9.11813545 -12.78110695 3.67147493 0 0 56
-7.80783701 -12.48738480 3.87290716 0 0 54
-7.84121847 -12.48827648 3.86781073 0 0 54
-7.87284422 -12.49046326 3.86321497 0 0 56
-7.89733934 -12.49111748 3.85954285 0 0 57
-7.92138147 -12.49265480 3.85600424 0 0 60
-7.94628000 -12.49466228 3.85223436 0 0 61
-7.97428083 -12.49547482 3.84447527 0 0 62
-7.99481726 -12.49685478 3.84502125 0 0 61
-8.02367210 -12.49813747 3.83703566 0 0 60
-8.05098915 -12.50019836 3.83363199 0 0 58
-8.07072639 -12.50160789 3.83128786 0 0 59
-8.09391785 -12.50267601 3.82797861 0 0 58
-8.11665726 -12.50462055 3.82480621 0 0 58
-8.14173698 -12.50575733 3.81994009 0 0 59
-8.16448021 -12.50770187 3.81676579 0 0 60
-8.18421555 -12.50911808 3.81442261 0 0 61
-8.20695877 -12.51106071 3.81124735 0 0 61
-8.22296906 -12.51283360 3.80890465 0 0 60
-8.24485970 -12.51430702 3.80596113 0 0 60
-8.26613235 -12.51494026 3.79902983 0 0 59
-8.28464508 -12.51762104 3.79911423 0 0 60
-8.30919266 -12.51877975 3.79231882 0 0 60
-8.32834435 -12.51970959 3.79116869 0 0 59
-8.35036659 -12.52254677 3.78716707 0 0 59
-8.36467552 -12.52337360 3.78528404 0 0 58
-8.38584709 -12.52573776 3.78151178 0 0 57
-8.40558434 -12.52715015 3.77916718 0 0 56
-8.42289543 -12.52850723 3.77645588 0 0 56
-8.43460083 -12.53015423 3.77530479 0 0 56
-8.45577049 -12.53252125 3.77153349 0 0 57
-8.47289848 -12.53475189 3.76992035 0 0 60
-8.48694229 -12.53558731 3.76707363 0 0 61
-8.50923157 -12.53841400 3.76403713 0 0 61
-8.51550865 -12.53947449 3.76334429 0 0 61
-8.53367615 -12.54130554 3.76040030 0 0 60
-8.54995155 -12.54306221 3.75901890 0 0 60
-8.56907272 -12.54363632 3.75268459 0 0 61
-8.58162498 -12.54575157 3.75130320 0 0 61
-8.59247780 -12.54692364 3.75038099 0 0 61
-8.62208176 -12.55041313 3.74532270 0 0 60
-8.63724136 -12.55170822 3.74320555 0 0 59
-8.64652252 -12.55330181 3.74168825 0 0 58
-8.66423607 -12.55601501 3.73887920 0 0 58
-8.67593765 -12.55766201 3.73772860 0 0 57
-8.68652153 -12.55884171 3.73584032 0 0 56
-8.71011543 -12.56126213 3.73243952 0 0 57
-8.71378708 -12.56313801 3.73247910 0 0 58
-8.72567368 -12.56391144 3.73022938 0 0 59
-8.74020004 -12.56696129 3.72934580 0 0 59
-8.75424004 -12.56779766 3.72649956 0 0 61
-8.76418686 -12.57073498 3.72584724 0 0 61
-8.77346992 -12.57232475 3.72432756 0 0 61
-8.79221916 -12.57464027 3.72019243 0 0 60
-8.81096649 -12.57695580 3.71605492 0 0 61
-8.82105255 -12.57851601 3.71742535 0 0 63
-8.82783318 -12.57919407 3.71347523 0 0 63
-8.84299088 -12.58049393 3.71136236 0 0 60
-8.84751129 -12.58284283 3.71117210 0 0 58
-8.86738014 -12.58562088 3.70776558 0 0 55
-8.88182068 -12.58780861 3.70482302 0 0 54
-8.90062523 -12.58788776 3.70064688 0 0 54
-8.89764595 -12.59044743 3.70357561 0 0 54
-8.90935326 -12.59209061 3.70242548 0 0 54
-8.92549324 -12.59522629 3.69901943 0 0 55
-8.92466927 -12.59784698 3.70135069 0 0 55
-8.94818115 -12.59940624 3.69588709 0 0 55
-8.96607590 -12.60124969 3.69197845 0 0 55
-8.97496033 -12.60148811 3.69055653 0 0 56
-8.98266983 -12.60350037 3.68843985 0 0 56
-8.99522591 -12.60561752 3.68705606 0 0 56
-8.99695969 -12.60965538 3.68869543 0 0 57
-9.01634407 -12.61021900 3.68332481 0 0 56
-9.01179695 -12.61319923 3.68565607 0 0 56
-9.02996445 -12.61503124 3.68271351 0 0 56
-9.03682137 -12.61657333 3.68082714 0 0 55
-9.03573418 -12.61920738 3.68219662 0 0 56
-9.05820656 -12.62116337 3.67806005 0 0 55
-9.05711555 -12.62379932 3.67943001 0 0 55
-9.08341980 -12.62366486 3.67213202 0 0 57
-9.07823372 -12.62839890 3.67569828 0 0 58
-9.08985519 -12.62918282 3.67248344 0 0 59
-9.10950851 -12.62973499 3.66807556 0 0 61
-9.09179688 -12.63544655 3.67512512 0 0 61
-9.11809731 -12.63531494 3.66782999 0 0 63
-9.12392616 -12.63725471 3.66727400 0 0 64
-9.12817764 -12.63961411 3.66612005 0 0 67
-9.13597107 -12.64248848 3.66606379 0 0 67
-9.14544106 -12.64320850 3.66344500 0 0 66
-9.14650345 -12.64590645 3.66421843 0 0 65
-9.16049194 -12.64897728 3.66140795 0 0 63
-9.15594673 -12.65195847 3.66374159 0 0 63
-9.17663383 -12.65211105 3.65800619 0 0 61
-9.16386986 -12.65619278 3.66262579 0 0 62
-9.16969490 -12.65813541 3.66206932 0 0 61
-9.19684601 -12.65847397 3.65454531 0 0 58
-9.18174171 -12.66336823 3.66086102 0 0 58
-9.20346832 -12.66312027 3.65379524 0 0 57
-9.20969200 -12.66641235 3.65314341 0 0 57
-9.21160698 -12.66958237 3.65368462 0 0 57
-9.21846771 -12.67112350 3.65179586 0 0 56
-9.22213936 -12.67300224 3.65183735 0 0 56
-9.22665977 -12.67535114 3.65164423 0 0 56
-9.22790527 -12.67717361 3.65132093 0 0 56
-9.23022270 -12.68169785 3.65176344 0 0 57
-9.23101997 -12.68440437 3.65157175 0 0 57
-9.23253441 -12.68622208 3.65220976 0 0 58
-9.23633575 -12.68946075 3.65118980 0 0 57
-9.24104309 -12.69093990 3.64990139 0 0 56
-9.23878288 -12.69534779 3.65057611 0 0 57
-9.26279831 -12.69378757 3.64493704 0 0 56
-9.26314354 -12.69737816 3.64488173 0 0 56
-9.26394081 -12.70008278 3.64468718 0 0 56
-9.26473808 -12.70278931 3.64449835 0 0 56
-9.26423073 -12.70590591 3.64466906 0 0 56
-9.26790237 -12.70778370 3.64471197 0 0 56
-9.26609421 -12.71131134 3.64525080 0 0 56
-9.25840759 -12.71513462 3.64638758 0 0 56
-9.26207542 -12.71701050 3.64642763 0 0 56
-9.25869370 -12.72095585 3.64636803 0 0 57
-9.25864029 -12.72319126 3.64640951 0 0 58
-9.24906540 -12.72693920 3.64910221 0 0 59
-9.24177742 -12.73211670 3.65014505 0 0 59
-9.24302864 -12.73394012 3.64981699 0 0 60
-9.23493958 -12.73640823 3.65104914 0 0 61
-9.22836876 -12.74069118 3.65291739 0 0 61
-9.24833870 -12.74173737 3.64635229 0 0 60
-9.22780800 -12.74604607 3.65313005 0 0 61
-9.24086380 -12.74778175 3.64849043 0 0 60
-9.23578072 -12.75078201 3.64889383 0 0 60
-9.21830559 -12.75612831 3.65172482 0 0 60
-9.19809151 -12.76093006 3.65634632 0 0 60
-9.19301224 -12.76393223 3.65674925 0 0 60
-9.17311287 -12.76922607 3.65921068 0 0 60
-9.14153862 -12.77597046 3.66492558 0 0 59
-9.13542366 -12.77937317 3.66665936 0 0 58
-9.14555550 -12.78143692 3.66490984 0 0 56
-6.78760862 -12.44622040 4.02672482 0 0 76
-7.84041739 -12.48830986 3.86491966 0 0 55
-7.87249231 -12.48961067 3.86019039 0 0 57
-7.89738894 -12.49162197 3.85642099 0 0 57
-7.92273569 -12.49274921 3.85251570 0 0 60
-7.94789553 -12.49474621 3.84970808 0 0 61
-7.97478437 -12.49509811 3.84122038 0 0 62
-7.99617147 -12.49694729 3.84153605 0 0 61
-8.02502441 -12.49823284 3.83354712 0 0 60
-8.05521584 -12.49946404 3.83037806 0 0 59
-8.07468605 -12.50088406 3.82706594 0 0 60
-8.09742546 -12.50283337 3.82389450 0 0 58
-8.12061691 -12.50389671 3.82058477 0 0 58
-8.14681625 -12.50549412 3.81645060 0 0 58
-8.16955376 -12.50743961 3.81328249 0 0 59
-8.18929291 -12.50885391 3.81093693 0 0 61
-8.21091652 -12.51033592 3.80702925 0 0 61
-8.22804642 -12.51256561 3.80541611 0 0 60
-8.24993515 -12.51404190 3.80247545 0 0 60
-8.27251244 -12.51426601 3.79517698 0 0 59
-8.29102707 -12.51694679 3.79526329 0 0 61
-8.31472206 -12.51763439 3.78869772 0 0 61
-8.33400536 -12.51992607 3.78648806 0 0 60
-8.35674667 -12.52187443 3.78331375 0 0 60
-8.37190628 -12.52317238 3.78120041 0 0 59
-8.39222527 -12.52506447 3.77766132 0 0 58
-8.41169548 -12.52648926 3.77435350 0 0 57
-8.42882347 -12.52871895 3.77273893 0 0 57
-8.44183159 -12.52995491 3.77122021 0 0 57
-8.46345329 -12.53143692 3.76731443 0 0 57
-8.47973061 -12.53319550 3.76593494 0 0 59
-8.49547768 -12.53497505 3.76262379 0 0 61
-8.51691246 -12.53733253 3.75981760 0 0 61
-8.52318954 -12.53838921 3.75912571 0 0 61
-8.54220581 -12.54069710 3.75595236 0 0 61
-8.55848503 -12.54245186 3.75456953 0 0 60
-8.57760620 -12.54302406 3.74823427 0 0 61
-8.58930969 -12.54467201 3.74708319 0 0 61
-8.60101128 -12.54631329 3.74593019 0 0 61
-8.63106537 -12.54891777 3.74073696 0 0 60
-8.64662552 -12.55157089 3.73852682 0 0 59
-8.65550995 -12.55181026 3.73710299 0 0 59
-8.67276955 -12.55540466 3.73442984 0 0 59
-8.68492508 -12.55616760 3.73314476 0 0 58
-8.69617653 -12.55869484 3.73212719 0 0 57
-8.72080421 -12.56071186 3.72739172 0 0 58
-8.72492981 -12.56170750 3.72729731 0 0 58
-8.73663139 -12.56335163 3.72614479 0 0 60
-8.75003433 -12.56594086 3.72453070 0 0 61
-8.76277542 -12.56718826 3.72205114 0 0 63
-8.77487564 -12.57018471 3.72080183 0 0 62
-8.78330803 -12.57130718 3.71951103 0 0 61
-8.80317497 -12.57408142 3.71610880 0 0 57
-8.82107162 -12.57592392 3.71220303 0 0 59
-8.82958794 -12.57790375 3.71297503 0 0 61
-8.83748436 -12.57904816 3.70976257 0 0 60
-8.85152626 -12.57988071 3.70691299 0 0 57
-8.85820198 -12.58229256 3.70612669 0 0 56
-8.88009262 -12.58376694 3.70318222 0 0 55
-8.89453125 -12.58595657 3.70024347 0 0 55
-8.91373444 -12.58738995 3.69597006 0 0 55
-8.91120911 -12.58907032 3.69876242 0 0 54
-8.92219162 -12.59160709 3.69677877 0 0 55
-8.93905640 -12.59384727 3.69420385 0 0 55
-8.93953514 -12.59606171 3.69617176 0 0 55
-8.96174240 -12.59802818 3.69107199 0 0 56
-8.97918892 -12.60074997 3.68730021 0 0 57
-8.98565102 -12.60093880 3.68550873 0 0 58
-8.99493408 -12.60253143 3.68399048 0 0 57
-9.00722122 -12.60465813 3.68164587 0 0 57
-9.01052094 -12.60828114 3.68388128 0 0 57
-9.03075790 -12.60931396 3.67828035 0 0 57
-9.02424431 -12.61135960 3.68010855 0 0 56
-9.04482841 -12.61324120 3.67753458 0 0 56
-9.05038643 -12.61519432 3.67601538 0 0 55
-9.05014610 -12.61830044 3.67715216 0 0 55
-9.07176781 -12.61978340 3.67324638 0 0 55
-9.07067871 -12.62242126 3.67461395 0 0 56
-9.09567642 -12.62269783 3.66768360 0 0 58
-9.09179497 -12.62701988 3.67088509 0 0 59
-9.10211372 -12.62821388 3.66803455 0 0 60
-9.12280464 -12.62836742 3.66229820 0 0 60
-9.10536003 -12.63407135 3.67031240 0 0 62
-9.13296700 -12.63352585 3.66264963 0 0 62
-9.13833809 -12.63635063 3.66222715 0 0 63
-9.14259148 -12.63870621 3.66107225 0 0 64
-9.15083694 -12.64069939 3.66088629 0 0 65
-9.15985489 -12.64230347 3.65840006 0 0 65
-9.16222191 -12.64459038 3.65880632 0 0 65
-9.17535782 -12.64718914 3.65622854 0 0 62
-9.17080879 -12.65016747 3.65856028 0 0 62
-9.19280243 -12.64990997 3.65246010 0 0 59
-9.17873383 -12.65440750 3.65744829 0 0 60
-9.18671417 -12.65640831 3.65629435 0 0 59
-9.21341515 -12.65762997 3.64890146 0 0 58
-9.19921303 -12.66075897 3.65494967 0 0 58
-9.21963692 -12.66092396 3.64825010 0 0 56
-9.22716522 -12.66380692 3.64723110 0 0 56
-9.23078156 -12.66792107 3.64731073 0 0 56
-9.23705673 -12.66897678 3.64661646 0 0 56
-9.23915672 -12.67127514 3.64606237 0 0 55
-9.24498177 -12.67321301 3.64550352 0 0 56
-9.24604607 -12.67591190 3.64627504 0 0 56
-9.24854469 -12.67956352 3.64562082 0 0 56
-9.25091171 -12.68185043 3.64602661 0 0 56
-9.25170898 -12.68455696 3.64583683 0 0 57
-9.25596046 -12.68691730 3.64468193 0 0 56
-9.26178932 -12.68885708 3.64412737 0 0 56
-9.25867462 -12.69279289 3.64502954 0 0 56
-9.28282166 -12.69259548 3.63833237 0 0 56
-9.28362083 -12.69530582 3.63814163 0 0 56
-9.28683853 -12.69806194 3.63831568 0 0 56
-9.28678322 -12.70029831 3.63835478 0 0 56
-9.28758430 -12.70300484 3.63816214 0 0 56
-9.28994942 -12.70529079 3.63856936 0 0 56
-9.29029083 -12.70888042 3.63851404 0 0 56
-9.28305817 -12.71182156 3.63951445 0 0 56
-9.28627586 -12.71458054 3.63968945 0 0 56
-9.28204346 -12.71805573 3.63986111 0 0 56
-9.28441238 -12.72034073 3.64026690 0 0 57
-9.27541924 -12.72457123 3.64176893 0 0 57
-9.27015495 -12.72844601 3.64327192 0 0 58
-9.27009773 -12.73068047 3.64331150 0 0 58
-9.26156044 -12.73402977 3.64467812 0 0 58
-9.25517654 -12.73744297 3.64544916 0 0 59
-9.27886963 -12.73812771 3.63888216 0 0 58
-9.25461578 -12.74279594 3.64566088 0 0 60
-9.26982498 -12.74459362 3.64042377 0 0 59
-9.26613045 -12.74804878 3.64252520 0 0 59
-9.25256157 -12.75216484 3.64425611 0 0 59
-9.23423576 -12.75703907 3.64731741 0 0 60
-9.23157692 -12.76009178 3.64808607 0 0 60
-9.21670532 -12.76461792 3.65018415 0 0 60
-9.18859100 -12.77101707 3.65493631 0 0 60
-9.17789650 -12.77430344 3.65690041 0 0 59
-9.16087341 -12.77876759 3.65959454 0 0 58
-9.16278839 -12.78193569 3.66013908 0 0 57
-9.20555115 -12.78269100 3.65035963 0 0 56
-7.83889627 -12.48922920 3.86120033 0 0 56
-7.87123823 -12.49052429 3.85743475 0 0 57
-7.89703798 -12.49077034 3.85339546 0 0 57
-7.92323732 -12.49236870 3.84925795 0 0 60
-7.94885111 -12.49348640 3.84631968 0 0 61
-7.97483015 -12.49559784 3.83809900 0 0 62
-7.99882555 -12.49663067 3.83768320 0 0 61
-8.02637863 -12.49832439 3.83006001 0 0 60
-8.05656815 -12.49955559 3.82688761 0 0 60
-8.07733917 -12.50056839 3.82321405 0 0 62
-8.10008240 -12.50251389 3.82004166 0 0 60
-8.12438965 -12.50403881 3.81746578 0 0 58
-8.14947128 -12.50517654 3.81259823 0 0 58
-8.17351532 -12.50671387 3.80906057 0 0 58
-8.19410133 -12.50859642 3.80648613 0 0 60
-8.21527290 -12.51096535 3.80271482 0 0 60
-8.23285484 -12.51231575 3.80096674 0 0 59
-8.25474358 -12.51378822 3.79802752 0 0 59
-8.27817345 -12.51448345 3.79049635 0 0 59
-8.29610252 -12.51668358 3.79177618 0 0 61
-8.31979942 -12.51737118 3.78521204 0 0 61
-8.33908081 -12.51966095 3.78300190 0 0 60
-8.36200714 -12.52073860 3.77873039 0 0 60
-8.37671661 -12.52291870 3.77674961 0 0 59
-8.39860725 -12.52439213 3.77380753 0 0 59
-8.41892624 -12.52628517 3.77026939 0 0 57
-8.43493462 -12.52805519 3.76792383 0 0 57
-8.44906044 -12.52975082 3.76714039 0 0 57
-8.46983337 -12.53076363 3.76346207 0 0 57
-8.48696327 -12.53299522 3.76184845 0 0 58
-8.50185204 -12.53430176 3.75877142 0 0 60
-8.52414513 -12.53713226 3.75573540 0 0 60
-8.53172493 -12.53777695 3.75467825 0 0 60
-8.55074120 -12.54008293 3.75150204 0 0 61
-8.56571770 -12.54225063 3.75048685 0 0 61
-8.58483505 -12.54282379 3.74415255 0 0 61
-8.59784508 -12.54405785 3.74263382 0 0 61
-8.60869789 -12.54523087 3.74171400 0 0 61
-8.63959885 -12.54830933 3.73628950 0 0 61
-8.65515900 -12.55095863 3.73407841 0 0 60
-8.66489410 -12.55167103 3.73242474 0 0 60
-8.68045235 -12.55432129 3.73021078 0 0 59
-8.69457817 -12.55601883 3.72942638 0 0 58
-8.70601273 -12.55767250 3.72730970 0 0 58
-8.72960663 -12.56009102 3.72390699 0 0 60
-8.73476219 -12.56068611 3.72248363 0 0 60
-8.74731827 -12.56280327 3.72109842 0 0 61
-8.75987244 -12.56491852 3.71971607 0 0 62
-8.77261353 -12.56616592 3.71723318 0 0 63
-8.78386307 -12.56869221 3.71621847 0 0 62
-8.79256248 -12.56980133 3.71589231 0 0 60
-8.81431580 -12.57265091 3.71092796 0 0 56
-8.83221245 -12.57449150 3.70702362 0 0 56
-8.83811951 -12.57729340 3.70852804 0 0 58
-8.84862518 -12.57761574 3.70457983 0 0 57
-8.86378479 -12.57891464 3.70246458 0 0 55
-8.86960793 -12.58085251 3.70190859 0 0 55
-8.89078140 -12.58321762 3.69813871 0 0 54
-8.90737534 -12.58547115 3.69460011 0 0 55
-8.92572594 -12.58643150 3.69055796 0 0 56
-8.92346573 -12.58810234 3.69431448 0 0 55
-8.93445015 -12.59063721 3.69233370 0 0 57
-8.94889450 -12.59282589 3.68938732 0 0 56
-8.95237732 -12.59557533 3.69052792 0 0 56
-8.97400093 -12.59706116 3.68662214 0 0 57
-8.98817444 -12.59925938 3.68271637 0 0 59
-8.99463654 -12.59944534 3.68092489 0 0 59
-9.00588989 -12.60197449 3.67990828 0 0 58
-9.01947784 -12.60369205 3.67719507 0 0 58
-9.02466583 -12.60738468 3.67787457 0 0 58
-9.04216385 -12.60787010 3.67406321 0 0 58
-9.03734970 -12.61086559 3.67543030 0 0 56
-9.05812263 -12.61187744 3.67175627 0 0 56
-9.06349373 -12.61469555 3.67133570 0 0 56
-9.06370926 -12.61692238 3.67233801 0 0 55
-9.08533287 -12.61841011 3.66843128 0 0 55
-9.08509254 -12.62151337 3.66956949 0 0 56
-9.10793495 -12.62172890 3.66323662 0 0 58
-9.10320282 -12.62557983 3.66666555 0 0 59
-9.11455727 -12.62637520 3.66248894 0 0 59
-9.14009094 -12.62662983 3.65748549 0 0 60
-9.11892128 -12.63268852 3.66549492 0 0 61
-9.14652443 -12.63214779 3.65783453 0 0 61
-9.15208244 -12.63409901 3.65631533 0 0 61
-9.15745544 -12.63692093 3.65589285 0 0 62
-9.16498375 -12.63980293 3.65487337 0 0 63
-9.17341232 -12.64092350 3.65358925 0 0 63
-9.17578316 -12.64320946 3.65399265 0 0 64
-9.18976974 -12.64628220 3.65118408 0 0 61
-9.18567467 -12.64838028 3.65338039 0 0 61
-9.20852089 -12.64859581 3.64704466 0 0 59
-9.19705582 -12.65227127 3.65130377 0 0 59
-9.20373344 -12.65468502 3.65051651 0 0 58
-9.22827721 -12.65584183 3.64372301 0 0 57
-9.21578026 -12.65991783 3.64930630 0 0 58
-9.23646927 -12.66006756 3.64357138 0 0 56
-9.24418068 -12.66208076 3.64145470 0 0 55
-9.24910164 -12.66578484 3.64116907 0 0 55
-9.25407791 -12.66725159 3.64084196 0 0 55
-9.25702477 -12.67002106 3.64005423 0 0 55
-9.26115036 -12.67101860 3.63995886 0 0 55
-9.26306534 -12.67418575 3.64049864 0 0 55
-9.26798248 -12.67788887 3.64021397 0 0 56
-9.26923370 -12.67971516 3.63988447 0 0 56
-9.27029800 -12.68241310 3.64065742 0 0 56
-9.27540207 -12.68524170 3.63927078 0 0 56
-9.28122711 -12.68718338 3.63871527 0 0 56
-9.27896500 -12.69158936 3.63938904 0 0 56
-9.30186653 -12.68957043 3.63301897 0 0 56
-9.30436516 -12.69322300 3.63236332 0 0 56
-9.30776787 -12.69510937 3.63144064 0 0 56
-9.30752754 -12.69821548 3.63258076 0 0 56
-9.31047821 -12.70098686 3.63179159 0 0 56
-9.31172752 -12.70281029 3.63146448 0 0 56
-9.31233978 -12.70638752 3.63237238 0 0 56
-9.30752182 -12.70938110 3.63373804 0 0 56
-9.31178093 -12.71173954 3.63258505 0 0 55
-9.30624390 -12.71562386 3.63312387 0 0 55
-9.30991745 -12.71750259 3.63316298 0 0 56
-9.30092430 -12.72173500 3.63466501 0 0 56
-9.29938126 -12.72524738 3.63616896 0 0 57
-9.30036354 -12.72708321 3.63487959 0 0 57
-9.29209328 -12.73042202 3.63720846 0 0 57
-9.28571129 -12.73383522 3.63797808 0 0 57
-9.30724716 -12.73445892 3.63200998 0 0 57
-9.28384590 -12.73959637 3.63855696 0 0 58
-9.29905319 -12.74139500 3.63332224 0 0 57
-9.29639626 -12.74445152 3.63409185 0 0 58
-9.28524780 -12.74862099 3.63619041 0 0 58
-9.26849365 -12.75307369 3.63984776 0 0 59
-9.26772118 -12.75620079 3.63905811 0 0 59
-9.25572014 -12.75989628 3.64138794 0 0 59
-9.23236656 -12.76553535 3.64481401 0 0 59
-9.22122002 -12.76970482 3.64691019 0 0 59
-9.19813347 -12.77533531 3.65129995 0 0 60
-9.18671989 -12.77951431 3.65243292 0 0 59
-9.18778801 -12.78221321 3.65320730 0 0 58
-9.21063042 -12.78242779 3.64687395 0 0 59
-6.58338690 -12.52002907 4.05303001 0 0 50
-7.86932039 -12.49009514 3.85380936 0 0 57
-7.89551973 -12.49169540 3.84967566 0 0 57
-7.92243528 -12.49240017 3.84636831 0 0 59
-7.94948244 -12.49447250 3.84200191 0 0 61
-7.97533464 -12.49522114 3.83484030 0 0 62
-8.00017738 -12.49672604 3.83419466 0 0 61
-8.02687645 -12.49794769 3.82679987 0 0 59
-8.05791855 -12.49965096 3.82340097 0 0 60
-8.08026123 -12.50024223 3.82032347 0 0 62
-8.10300255 -12.50218773 3.81715298 0 0 61
-8.12677956 -12.50373650 3.81264782 0 0 60
-8.15297890 -12.50533390 3.80851650 0 0 59
-8.17729187 -12.50686264 3.80594063 0 0 58
-8.19832611 -12.50786400 3.80323076 0 0 59
-8.21949577 -12.51023102 3.79945898 0 0 59
-8.23708153 -12.51157951 3.79771137 0 0 59
-8.25982094 -12.51352310 3.79453802 0 0 59
-8.28239632 -12.51374722 3.78724146 0 0 59
-8.30136681 -12.51555061 3.78719187 0 0 62
-8.32545853 -12.51758671 3.78053188 0 0 61
-8.34519577 -12.51900005 3.77818394 0 0 60
-8.36793709 -12.52094650 3.77501249 0 0 59
-8.38224602 -12.52177238 3.77312899 0 0 59
-8.40498734 -12.52371788 3.76995516 0 0 59
-8.42400360 -12.52602005 3.76678419 0 0 58
-8.44131660 -12.52738190 3.76407051 0 0 57
-8.45674324 -12.52866936 3.76291895 0 0 57
-8.47621155 -12.53009129 3.75961256 0 0 57
-8.49392700 -12.53280544 3.75680494 0 0 58
-8.50823593 -12.53363037 3.75491858 0 0 59
-8.53025818 -12.53646851 3.75091791 0 0 59
-8.53895569 -12.53757668 3.75059223 0 0 59
-8.55797386 -12.53988075 3.74742031 0 0 60
-8.57339859 -12.54116726 3.74626875 0 0 61
-8.59337044 -12.54221153 3.73970222 0 0 60
-8.60637665 -12.54344749 3.73818541 0 0 61
-8.61722946 -12.54462051 3.73726130 0 0 61
-8.64813614 -12.54769897 3.73183775 0 0 61
-8.66369438 -12.55034637 3.72962999 0 0 60
-8.67257500 -12.55058861 3.72820377 0 0 60
-8.69029045 -12.55329990 3.72539663 0 0 58
-8.70441437 -12.55499840 3.72460985 0 0 58
-8.71584892 -12.55665207 3.72249651 0 0 59
-8.73787308 -12.55948925 3.71849298 0 0 61
-8.74414825 -12.56054878 3.71780157 0 0 62
-8.75715637 -12.56178284 3.71628380 0 0 64
-8.76970863 -12.56389904 3.71490192 0 0 63
-8.78226280 -12.56601620 3.71352005 0 0 63
-8.79396629 -12.56765938 3.71236706 0 0 61
-8.80325127 -12.56925297 3.71084881 0 0 59
-8.82526970 -12.57208824 3.70684576 0 0 55
-8.84290123 -12.57394600 3.70197630 0 0 55
-8.85011292 -12.57633591 3.70311594 0 0 56
-8.86088371 -12.57664871 3.70013094 0 0 55
-8.87707901 -12.57754707 3.69668818 0 0 55
-8.88160133 -12.57989502 3.69649744 0 0 54
-8.90303612 -12.58224869 3.69369078 0 0 54
-8.92008591 -12.58362007 3.69001627 0 0 56
-8.93713188 -12.58499050 3.68633938 0 0 58
-8.93460846 -12.58666992 3.68913364 0 0 57
-8.94428825 -12.58961678 3.68751860 0 0 58
-8.95984650 -12.59226608 3.68530846 0 0 56
-8.96378708 -12.59413528 3.68631268 0 0 56
-8.98383904 -12.59603786 3.68180847 0 0 58
-8.99801254 -12.59823895 3.67790079 0 0 58
-9.00604630 -12.59800434 3.67670870 0 0 58
-9.01833153 -12.60013199 3.67436218 0 0 58
-9.02976799 -12.60178852 3.67224598 0 0 59
-9.03561783 -12.60682297 3.67379093 0 0 58
-9.05330658 -12.60644054 3.66888189 0 0 57
-9.04961014 -12.60989380 3.67098093 0 0 57
-9.07168388 -12.61049843 3.66694355 0 0 56
-9.07678986 -12.61332989 3.66555738 0 0 56
-9.07857323 -12.61513519 3.66715717 0 0 55
-9.09862518 -12.61703873 3.66265297 0 0 56
-9.09838676 -12.62014389 3.66379166 0 0 57
-9.12064934 -12.61987686 3.65865326 0 0 58
-9.11604500 -12.62509346 3.66102219 0 0 58
-9.12942123 -12.62458801 3.65730906 0 0 58
-9.15365028 -12.62524796 3.65267134 0 0 61
-9.13378525 -12.63090229 3.66031599 0 0 60
-9.16008949 -12.63076973 3.65302181 0 0 59
-9.16519356 -12.63360405 3.65163755 0 0 59
-9.17101860 -12.63554192 3.65107965 0 0 60
-9.17854691 -12.63842583 3.65005875 0 0 61
-9.18612289 -12.63907623 3.64900351 0 0 62
-9.18934250 -12.64183426 3.64918041 0 0 63
-9.20378304 -12.64402294 3.64623547 0 0 60
-9.20139122 -12.64706421 3.64797020 0 0 60
-9.22208214 -12.64721966 3.64223242 0 0 58
[truncated: 2,976,156 more chars]
